# Supplementary material for: An Empirical Study of Machine Learning Algorithms for Stock Daily Trading Strategy
Source: Hindawi journal article supplement (doi:10.1155/2019/7816154), 2019-01-01
Supplement: f1 [file 7816154.f1.zip]

Archive with 810 entries (807 files):
- Optional Supplementary Materials(Data, code, and results)/
- Optional Supplementary Materials(Data, code, and results)/.CART.R
- Optional Supplementary Materials(Data, code, and results)/.DBN.R
- Optional Supplementary Materials(Data, code, and results)/.DataProcess.R
- Optional Supplementary Materials(Data, code, and results)/.DownLoad_CSI300.R
- Optional Supplementary Materials(Data, code, and results)/.DownLoad_Divid_Split_CSI300.R
- Optional Supplementary Materials(Data, code, and results)/.DownLoad_SP500.R
- Optional Supplementary Materials(Data, code, and results)/.Eva_Direction_ML.R
- Optional Supplementary Materials(Data, code, and results)/.Eva_Performance.R
- Optional Supplementary Materials(Data, code, and results)/.Eva_Performance_Cost.R
- Optional Supplementary Materials(Data, code, and results)/.FuQuan.R
- Optional Supplementary Materials(Data, code, and results)/.GRU.R
- Optional Supplementary Materials(Data, code, and results)/.LSTM.R
- Optional Supplementary Materials(Data, code, and results)/.LogitReg.R
- Optional Supplementary Materials(Data, code, and results)/.MLP.R
- Optional Supplementary Materials(Data, code, and results)/.NaiveBayes.R
- Optional Supplementary Materials(Data, code, and results)/.NewHS300.csv
- Optional Supplementary Materials(Data, code, and results)/.NewSP500.csv
- Optional Supplementary Materials(Data, code, and results)/.RNN.R
- Optional Supplementary Materials(Data, code, and results)/.RandomForest.R
- Optional Supplementary Materials(Data, code, and results)/.SAE.R
- Optional Supplementary Materials(Data, code, and results)/.SVM.R
- Optional Supplementary Materials(Data, code, and results)/.TechIndi.R
- Optional Supplementary Materials(Data, code, and results)/.XGBboost.R
- Optional Supplementary Materials(Data, code, and results)/CSICS/
- Optional Supplementary Materials(Data, code, and results)/CSICS/.218ARR_Cost.csv
- Optional Supplementary Materials(Data, code, and results)/CSICS/.218ASR_Cost.csv
- Optional Supplementary Materials(Data, code, and results)/CSICS/.218MDD_Cost.csv
- Optional Supplementary Materials(Data, code, and results)/CSICS/.218NewHS300_Performance_CART_Cost_0.01_0.001.csv
- Optional Supplementary Materials(Data, code, and results)/CSICS/.218NewHS300_Performance_CART_Cost_0.01_0.002.csv
- Optional Supplementary Materials(Data, code, and results)/CSICS/.218NewHS300_Performance_CART_Cost_0.01_0.003.csv
- Optional Supplementary Materials(Data, code, and results)/CSICS/.218NewHS300_Performance_CART_Cost_0.01_0.004.csv
- Optional Supplementary Materials(Data, code, and results)/CSICS/.218NewHS300_Performance_CART_Cost_0.01_0.005.csv
- Optional Supplementary Materials(Data, code, and results)/CSICS/.218NewHS300_Performance_CART_Cost_0.01_0.csv
- Optional Supplementary Materials(Data, code, and results)/CSICS/.218NewHS300_Performance_CART_Cost_0.02_0.001.csv
- Optional Supplementary Materials(Data, code, and results)/CSICS/.218NewHS300_Performance_CART_Cost_0.02_0.002.csv
- Optional Supplementary Materials(Data, code, and results)/CSICS/.218NewHS300_Performance_CART_Cost_0.02_0.003.csv
- Optional Supplementary Materials(Data, code, and results)/CSICS/.218NewHS300_Performance_CART_Cost_0.02_0.004.csv
- Optional Supplementary Materials(Data, code, and results)/CSICS/.218NewHS300_Performance_CART_Cost_0.02_0.005.csv
- Optional Supplementary Materials(Data, code, and results)/CSICS/.218NewHS300_Performance_CART_Cost_0.02_0.csv
- Optional Supplementary Materials(Data, code, and results)/CSICS/.218NewHS300_Performance_CART_Cost_0.03_0.001.csv
- Optional Supplementary Materials(Data, code, and results)/CSICS/.218NewHS300_Performance_CART_Cost_0.03_0.002.csv
- Optional Supplementary Materials(Data, code, and results)/CSICS/.218NewHS300_Performance_CART_Cost_0.03_0.003.csv
- Optional Supplementary Materials(Data, code, and results)/CSICS/.218NewHS300_Performance_CART_Cost_0.03_0.004.csv
- Optional Supplementary Materials(Data, code, and results)/CSICS/.218NewHS300_Performance_CART_Cost_0.03_0.005.csv
- Optional Supplementary Materials(Data, code, and results)/CSICS/.218NewHS300_Performance_CART_Cost_0.03_0.csv
- Optional Supplementary Materials(Data, code, and results)/CSICS/.218NewHS300_Performance_CART_Cost_0.04_0.001.csv
- Optional Supplementary Materials(Data, code, and results)/CSICS/.218NewHS300_Performance_CART_Cost_0.04_0.002.csv
- Optional Supplementary Materials(Data, code, and results)/CSICS/.218NewHS300_Performance_CART_Cost_0.04_0.003.csv
- Optional Supplementary Materials(Data, code, and results)/CSICS/.218NewHS300_Performance_CART_Cost_0.04_0.004.csv
- Optional Supplementary Materials(Data, code, and results)/CSICS/.218NewHS300_Performance_CART_Cost_0.04_0.005.csv
- Optional Supplementary Materials(Data, code, and results)/CSICS/.218NewHS300_Performance_CART_Cost_0.04_0.csv
- Optional Supplementary Materials(Data, code, and results)/CSICS/.218NewHS300_Performance_CART_Cost_0_0.001.csv
- Optional Supplementary Materials(Data, code, and results)/CSICS/.218NewHS300_Performance_CART_Cost_0_0.002.csv
- Optional Supplementary Materials(Data, code, and results)/CSICS/.218NewHS300_Performance_CART_Cost_0_0.003.csv
- Optional Supplementary Materials(Data, code, and results)/CSICS/.218NewHS300_Performance_CART_Cost_0_0.004.csv
- Optional Supplementary Materials(Data, code, and results)/CSICS/.218NewHS300_Performance_CART_Cost_0_0.005.csv
- Optional Supplementary Materials(Data, code, and results)/CSICS/.218NewHS300_Performance_CART_Cost_0_0.csv
- Optional Supplementary Materials(Data, code, and results)/CSICS/.218NewHS300_Performance_DBN_Cost_0.01_0.001.csv
- Optional Supplementary Materials(Data, code, and results)/CSICS/.218NewHS300_Performance_DBN_Cost_0.01_0.002.csv
- Optional Supplementary Materials(Data, code, and results)/CSICS/.218NewHS300_Performance_DBN_Cost_0.01_0.003.csv
- Optional Supplementary Materials(Data, code, and results)/CSICS/.218NewHS300_Performance_DBN_Cost_0.01_0.004.csv
- Optional Supplementary Materials(Data, code, and results)/CSICS/.218NewHS300_Performance_DBN_Cost_0.01_0.005.csv
- Optional Supplementary Materials(Data, code, and results)/CSICS/.218NewHS300_Performance_DBN_Cost_0.01_0.csv
- Optional Supplementary Materials(Data, code, and results)/CSICS/.218NewHS300_Performance_DBN_Cost_0.02_0.001.csv
- Optional Supplementary Materials(Data, code, and results)/CSICS/.218NewHS300_Performance_DBN_Cost_0.02_0.002.csv
- Optional Supplementary Materials(Data, code, and results)/CSICS/.218NewHS300_Performance_DBN_Cost_0.02_0.003.csv
- Optional Supplementary Materials(Data, code, and results)/CSICS/.218NewHS300_Performance_DBN_Cost_0.02_0.004.csv
- Optional Supplementary Materials(Data, code, and results)/CSICS/.218NewHS300_Performance_DBN_Cost_0.02_0.005.csv
- Optional Supplementary Materials(Data, code, and results)/CSICS/.218NewHS300_Performance_DBN_Cost_0.02_0.csv
- Optional Supplementary Materials(Data, code, and results)/CSICS/.218NewHS300_Performance_DBN_Cost_0.03_0.001.csv
- Optional Supplementary Materials(Data, code, and results)/CSICS/.218NewHS300_Performance_DBN_Cost_0.03_0.002.csv
- Optional Supplementary Materials(Data, code, and results)/CSICS/.218NewHS300_Performance_DBN_Cost_0.03_0.003.csv
- Optional Supplementary Materials(Data, code, and results)/CSICS/.218NewHS300_Performance_DBN_Cost_0.03_0.004.csv
- Optional Supplementary Materials(Data, code, and results)/CSICS/.218NewHS300_Performance_DBN_Cost_0.03_0.005.csv
- Optional Supplementary Materials(Data, code, and results)/CSICS/.218NewHS300_Performance_DBN_Cost_0.03_0.csv
- Optional Supplementary Materials(Data, code, and results)/CSICS/.218NewHS300_Performance_DBN_Cost_0.04_0.001.csv
- Optional Supplementary Materials(Data, code, and results)/CSICS/.218NewHS300_Performance_DBN_Cost_0.04_0.002.csv
- Optional Supplementary Materials(Data, code, and results)/CSICS/.218NewHS300_Performance_DBN_Cost_0.04_0.003.csv
- Optional Supplementary Materials(Data, code, and results)/CSICS/.218NewHS300_Performance_DBN_Cost_0.04_0.004.csv
- Optional Supplementary Materials(Data, code, and results)/CSICS/.218NewHS300_Performance_DBN_Cost_0.04_0.005.csv
- Optional Supplementary Materials(Data, code, and results)/CSICS/.218NewHS300_Performance_DBN_Cost_0.04_0.csv
- Optional Supplementary Materials(Data, code, and results)/CSICS/.218NewHS300_Performance_DBN_Cost_0_0.001.csv
- Optional Supplementary Materials(Data, code, and results)/CSICS/.218NewHS300_Performance_DBN_Cost_0_0.002.csv
- Optional Supplementary Materials(Data, code, and results)/CSICS/.218NewHS300_Performance_DBN_Cost_0_0.003.csv
- Optional Supplementary Materials(Data, code, and results)/CSICS/.218NewHS300_Performance_DBN_Cost_0_0.004.csv
- Optional Supplementary Materials(Data, code, and results)/CSICS/.218NewHS300_Performance_DBN_Cost_0_0.005.csv
- Optional Supplementary Materials(Data, code, and results)/CSICS/.218NewHS300_Performance_DBN_Cost_0_0.csv
- Optional Supplementary Materials(Data, code, and results)/CSICS/.218NewHS300_Performance_GRU_Cost_0.01_0.001.csv
- Optional Supplementary Materials(Data, code, and results)/CSICS/.218NewHS300_Performance_GRU_Cost_0.01_0.002.csv
- Optional Supplementary Materials(Data, code, and results)/CSICS/.218NewHS300_Performance_GRU_Cost_0.01_0.003.csv
- Optional Supplementary Materials(Data, code, and results)/CSICS/.218NewHS300_Performance_GRU_Cost_0.01_0.004.csv
- Optional Supplementary Materials(Data, code, and results)/CSICS/.218NewHS300_Performance_GRU_Cost_0.01_0.005.csv
- Optional Supplementary Materials(Data, code, and results)/CSICS/.218NewHS300_Performance_GRU_Cost_0.01_0.csv
- Optional Supplementary Materials(Data, code, and results)/CSICS/.218NewHS300_Performance_GRU_Cost_0.02_0.001.csv
- Optional Supplementary Materials(Data, code, and results)/CSICS/.218NewHS300_Performance_GRU_Cost_0.02_0.002.csv
- Optional Supplementary Materials(Data, code, and results)/CSICS/.218NewHS300_Performance_GRU_Cost_0.02_0.003.csv
- Optional Supplementary Materials(Data, code, and results)/CSICS/.218NewHS300_Performance_GRU_Cost_0.02_0.004.csv
- Optional Supplementary Materials(Data, code, and results)/CSICS/.218NewHS300_Performance_GRU_Cost_0.02_0.005.csv
- Optional Supplementary Materials(Data, code, and results)/CSICS/.218NewHS300_Performance_GRU_Cost_0.02_0.csv
- Optional Supplementary Materials(Data, code, and results)/CSICS/.218NewHS300_Performance_GRU_Cost_0.03_0.001.csv
- Optional Supplementary Materials(Data, code, and results)/CSICS/.218NewHS300_Performance_GRU_Cost_0.03_0.002.csv
- Optional Supplementary Materials(Data, code, and results)/CSICS/.218NewHS300_Performance_GRU_Cost_0.03_0.003.csv
- Optional Supplementary Materials(Data, code, and results)/CSICS/.218NewHS300_Performance_GRU_Cost_0.03_0.004.csv
- Optional Supplementary Materials(Data, code, and results)/CSICS/.218NewHS300_Performance_GRU_Cost_0.03_0.005.csv
- Optional Supplementary Materials(Data, code, and results)/CSICS/.218NewHS300_Performance_GRU_Cost_0.03_0.csv
- Optional Supplementary Materials(Data, code, and results)/CSICS/.218NewHS300_Performance_GRU_Cost_0.04_0.001.csv
- Optional Supplementary Materials(Data, code, and results)/CSICS/.218NewHS300_Performance_GRU_Cost_0.04_0.002.csv
- Optional Supplementary Materials(Data, code, and results)/CSICS/.218NewHS300_Performance_GRU_Cost_0.04_0.003.csv
- Optional Supplementary Materials(Data, code, and results)/CSICS/.218NewHS300_Performance_GRU_Cost_0.04_0.004.csv
- Optional Supplementary Materials(Data, code, and results)/CSICS/.218NewHS300_Performance_GRU_Cost_0.04_0.005.csv
- Optional Supplementary Materials(Data, code, and results)/CSICS/.218NewHS300_Performance_GRU_Cost_0.04_0.csv
- Optional Supplementary Materials(Data, code, and results)/CSICS/.218NewHS300_Performance_GRU_Cost_0_0.001.csv
- Optional Supplementary Materials(Data, code, and results)/CSICS/.218NewHS300_Performance_GRU_Cost_0_0.002.csv
- Optional Supplementary Materials(Data, code, and results)/CSICS/.218NewHS300_Performance_GRU_Cost_0_0.003.csv
- Optional Supplementary Materials(Data, code, and results)/CSICS/.218NewHS300_Performance_GRU_Cost_0_0.004.csv
- Optional Supplementary Materials(Data, code, and results)/CSICS/.218NewHS300_Performance_GRU_Cost_0_0.005.csv
- Optional Supplementary Materials(Data, code, and results)/CSICS/.218NewHS300_Performance_GRU_Cost_0_0.csv
- Optional Supplementary Materials(Data, code, and results)/CSICS/.218NewHS300_Performance_LR_Cost_0.01_0.001.csv
- Optional Supplementary Materials(Data, code, and results)/CSICS/.218NewHS300_Performance_LR_Cost_0.01_0.002.csv
- Optional Supplementary Materials(Data, code, and results)/CSICS/.218NewHS300_Performance_LR_Cost_0.01_0.003.csv
- Optional Supplementary Materials(Data, code, and results)/CSICS/.218NewHS300_Performance_LR_Cost_0.01_0.004.csv
- Optional Supplementary Materials(Data, code, and results)/CSICS/.218NewHS300_Performance_LR_Cost_0.01_0.005.csv
- Optional Supplementary Materials(Data, code, and results)/CSICS/.218NewHS300_Performance_LR_Cost_0.01_0.csv
- Optional Supplementary Materials(Data, code, and results)/CSICS/.218NewHS300_Performance_LR_Cost_0.02_0.001.csv
- Optional Supplementary Materials(Data, code, and results)/CSICS/.218NewHS300_Performance_LR_Cost_0.02_0.002.csv
- Optional Supplementary Materials(Data, code, and results)/CSICS/.218NewHS300_Performance_LR_Cost_0.02_0.003.csv
- Optional Supplementary Materials(Data, code, and results)/CSICS/.218NewHS300_Performance_LR_Cost_0.02_0.004.csv
- Optional Supplementary Materials(Data, code, and results)/CSICS/.218NewHS300_Performance_LR_Cost_0.02_0.005.csv
- Optional Supplementary Materials(Data, code, and results)/CSICS/.218NewHS300_Performance_LR_Cost_0.02_0.csv
- Optional Supplementary Materials(Data, code, and results)/CSICS/.218NewHS300_Performance_LR_Cost_0.03_0.001.csv
- Optional Supplementary Materials(Data, code, and results)/CSICS/.218NewHS300_Performance_LR_Cost_0.03_0.002.csv
- Optional Supplementary Materials(Data, code, and results)/CSICS/.218NewHS300_Performance_LR_Cost_0.03_0.003.csv
- Optional Supplementary Materials(Data, code, and results)/CSICS/.218NewHS300_Performance_LR_Cost_0.03_0.004.csv
- Optional Supplementary Materials(Data, code, and results)/CSICS/.218NewHS300_Performance_LR_Cost_0.03_0.005.csv
- Optional Supplementary Materials(Data, code, and results)/CSICS/.218NewHS300_Performance_LR_Cost_0.03_0.csv
- Optional Supplementary Materials(Data, code, and results)/CSICS/.218NewHS300_Performance_LR_Cost_0.04_0.001.csv
- Optional Supplementary Materials(Data, code, and results)/CSICS/.218NewHS300_Performance_LR_Cost_0.04_0.002.csv
- Optional Supplementary Materials(Data, code, and results)/CSICS/.218NewHS300_Performance_LR_Cost_0.04_0.003.csv
- Optional Supplementary Materials(Data, code, and results)/CSICS/.218NewHS300_Performance_LR_Cost_0.04_0.004.csv
- Optional Supplementary Materials(Data, code, and results)/CSICS/.218NewHS300_Performance_LR_Cost_0.04_0.005.csv
- Optional Supplementary Materials(Data, code, and results)/CSICS/.218NewHS300_Performance_LR_Cost_0.04_0.csv
- Optional Supplementary Materials(Data, code, and results)/CSICS/.218NewHS300_Performance_LR_Cost_0_0.001.csv
- Optional Supplementary Materials(Data, code, and results)/CSICS/.218NewHS300_Performance_LR_Cost_0_0.002.csv
- Optional Supplementary Materials(Data, code, and results)/CSICS/.218NewHS300_Performance_LR_Cost_0_0.003.csv
- Optional Supplementary Materials(Data, code, and results)/CSICS/.218NewHS300_Performance_LR_Cost_0_0.004.csv
- Optional Supplementary Materials(Data, code, and results)/CSICS/.218NewHS300_Performance_LR_Cost_0_0.005.csv
- Optional Supplementary Materials(Data, code, and results)/CSICS/.218NewHS300_Performance_LR_Cost_0_0.csv
- Optional Supplementary Materials(Data, code, and results)/CSICS/.218NewHS300_Performance_LSTM_Cost_0.01_0.001.csv
- Optional Supplementary Materials(Data, code, and results)/CSICS/.218NewHS300_Performance_LSTM_Cost_0.01_0.002.csv
- Optional Supplementary Materials(Data, code, and results)/CSICS/.218NewHS300_Performance_LSTM_Cost_0.01_0.003.csv
- Optional Supplementary Materials(Data, code, and results)/CSICS/.218NewHS300_Performance_LSTM_Cost_0.01_0.004.csv
- Optional Supplementary Materials(Data, code, and results)/CSICS/.218NewHS300_Performance_LSTM_Cost_0.01_0.005.csv
- Optional Supplementary Materials(Data, code, and results)/CSICS/.218NewHS300_Performance_LSTM_Cost_0.01_0.csv
- Optional Supplementary Materials(Data, code, and results)/CSICS/.218NewHS300_Performance_LSTM_Cost_0.02_0.001.csv
- Optional Supplementary Materials(Data, code, and results)/CSICS/.218NewHS300_Performance_LSTM_Cost_0.02_0.002.csv
- Optional Supplementary Materials(Data, code, and results)/CSICS/.218NewHS300_Performance_LSTM_Cost_0.02_0.003.csv
- Optional Supplementary Materials(Data, code, and results)/CSICS/.218NewHS300_Performance_LSTM_Cost_0.02_0.004.csv
- Optional Supplementary Materials(Data, code, and results)/CSICS/.218NewHS300_Performance_LSTM_Cost_0.02_0.005.csv
- Optional Supplementary Materials(Data, code, and results)/CSICS/.218NewHS300_Performance_LSTM_Cost_0.02_0.csv
- Optional Supplementary Materials(Data, code, and results)/CSICS/.218NewHS300_Performance_LSTM_Cost_0.03_0.001.csv
- Optional Supplementary Materials(Data, code, and results)/CSICS/.218NewHS300_Performance_LSTM_Cost_0.03_0.002.csv
- Optional Supplementary Materials(Data, code, and results)/CSICS/.218NewHS300_Performance_LSTM_Cost_0.03_0.003.csv
- Optional Supplementary Materials(Data, code, and results)/CSICS/.218NewHS300_Performance_LSTM_Cost_0.03_0.004.csv
- Optional Supplementary Materials(Data, code, and results)/CSICS/.218NewHS300_Performance_LSTM_Cost_0.03_0.005.csv
- Optional Supplementary Materials(Data, code, and results)/CSICS/.218NewHS300_Performance_LSTM_Cost_0.03_0.csv
- Optional Supplementary Materials(Data, code, and results)/CSICS/.218NewHS300_Performance_LSTM_Cost_0.04_0.001.csv
- Optional Supplementary Materials(Data, code, and results)/CSICS/.218NewHS300_Performance_LSTM_Cost_0.04_0.002.csv
- Optional Supplementary Materials(Data, code, and results)/CSICS/.218NewHS300_Performance_LSTM_Cost_0.04_0.003.csv
- Optional Supplementary Materials(Data, code, and results)/CSICS/.218NewHS300_Performance_LSTM_Cost_0.04_0.004.csv
- Optional Supplementary Materials(Data, code, and results)/CSICS/.218NewHS300_Performance_LSTM_Cost_0.04_0.005.csv
- Optional Supplementary Materials(Data, code, and results)/CSICS/.218NewHS300_Performance_LSTM_Cost_0.04_0.csv
- Optional Supplementary Materials(Data, code, and results)/CSICS/.218NewHS300_Performance_LSTM_Cost_0_0.001.csv
- Optional Supplementary Materials(Data, code, and results)/CSICS/.218NewHS300_Performance_LSTM_Cost_0_0.002.csv
- Optional Supplementary Materials(Data, code, and results)/CSICS/.218NewHS300_Performance_LSTM_Cost_0_0.003.csv
- Optional Supplementary Materials(Data, code, and results)/CSICS/.218NewHS300_Performance_LSTM_Cost_0_0.004.csv
- Optional Supplementary Materials(Data, code, and results)/CSICS/.218NewHS300_Performance_LSTM_Cost_0_0.005.csv
- Optional Supplementary Materials(Data, code, and results)/CSICS/.218NewHS300_Performance_LSTM_Cost_0_0.csv
- Optional Supplementary Materials(Data, code, and results)/CSICS/.218NewHS300_Performance_MLP_Cost_0.01_0.001.csv
- Optional Supplementary Materials(Data, code, and results)/CSICS/.218NewHS300_Performance_MLP_Cost_0.01_0.002.csv
- Optional Supplementary Materials(Data, code, and results)/CSICS/.218NewHS300_Performance_MLP_Cost_0.01_0.003.csv
- Optional Supplementary Materials(Data, code, and results)/CSICS/.218NewHS300_Performance_MLP_Cost_0.01_0.004.csv
- Optional Supplementary Materials(Data, code, and results)/CSICS/.218NewHS300_Performance_MLP_Cost_0.01_0.005.csv
- Optional Supplementary Materials(Data, code, and results)/CSICS/.218NewHS300_Performance_MLP_Cost_0.01_0.csv
- Optional Supplementary Materials(Data, code, and results)/CSICS/.218NewHS300_Performance_MLP_Cost_0.02_0.001.csv
- Optional Supplementary Materials(Data, code, and results)/CSICS/.218NewHS300_Performance_MLP_Cost_0.02_0.002.csv
- Optional Supplementary Materials(Data, code, and results)/CSICS/.218NewHS300_Performance_MLP_Cost_0.02_0.003.csv
- Optional Supplementary Materials(Data, code, and results)/CSICS/.218NewHS300_Performance_MLP_Cost_0.02_0.004.csv
- Optional Supplementary Materials(Data, code, and results)/CSICS/.218NewHS300_Performance_MLP_Cost_0.02_0.005.csv
- Optional Supplementary Materials(Data, code, and results)/CSICS/.218NewHS300_Performance_MLP_Cost_0.02_0.csv
- Optional Supplementary Materials(Data, code, and results)/CSICS/.218NewHS300_Performance_MLP_Cost_0.03_0.001.csv
- Optional Supplementary Materials(Data, code, and results)/CSICS/.218NewHS300_Performance_MLP_Cost_0.03_0.002.csv
- Optional Supplementary Materials(Data, code, and results)/CSICS/.218NewHS300_Performance_MLP_Cost_0.03_0.003.csv
- Optional Supplementary Materials(Data, code, and results)/CSICS/.218NewHS300_Performance_MLP_Cost_0.03_0.004.csv
- Optional Supplementary Materials(Data, code, and results)/CSICS/.218NewHS300_Performance_MLP_Cost_0.03_0.005.csv
- Optional Supplementary Materials(Data, code, and results)/CSICS/.218NewHS300_Performance_MLP_Cost_0.03_0.csv
- Optional Supplementary Materials(Data, code, and results)/CSICS/.218NewHS300_Performance_MLP_Cost_0.04_0.001.csv
- Optional Supplementary Materials(Data, code, and results)/CSICS/.218NewHS300_Performance_MLP_Cost_0.04_0.002.csv
- Optional Supplementary Materials(Data, code, and results)/CSICS/.218NewHS300_Performance_MLP_Cost_0.04_0.003.csv
- Optional Supplementary Materials(Data, code, and results)/CSICS/.218NewHS300_Performance_MLP_Cost_0.04_0.004.csv
- Optional Supplementary Materials(Data, code, and results)/CSICS/.218NewHS300_Performance_MLP_Cost_0.04_0.005.csv
- Optional Supplementary Materials(Data, code, and results)/CSICS/.218NewHS300_Performance_MLP_Cost_0.04_0.csv
- Optional Supplementary Materials(Data, code, and results)/CSICS/.218NewHS300_Performance_MLP_Cost_0_0.001.csv
- Optional Supplementary Materials(Data, code, and results)/CSICS/.218NewHS300_Performance_MLP_Cost_0_0.002.csv
- Optional Supplementary Materials(Data, code, and results)/CSICS/.218NewHS300_Performance_MLP_Cost_0_0.003.csv
- Optional Supplementary Materials(Data, code, and results)/CSICS/.218NewHS300_Performance_MLP_Cost_0_0.004.csv
- Optional Supplementary Materials(Data, code, and results)/CSICS/.218NewHS300_Performance_MLP_Cost_0_0.005.csv
- Optional Supplementary Materials(Data, code, and results)/CSICS/.218NewHS300_Performance_MLP_Cost_0_0.csv
- Optional Supplementary Materials(Data, code, and results)/CSICS/.218NewHS300_Performance_NB_Cost_0.01_0.001.csv
- Optional Supplementary Materials(Data, code, and results)/CSICS/.218NewHS300_Performance_NB_Cost_0.01_0.002.csv
- Optional Supplementary Materials(Data, code, and results)/CSICS/.218NewHS300_Performance_NB_Cost_0.01_0.003.csv
- Optional Supplementary Materials(Data, code, and results)/CSICS/.218NewHS300_Performance_NB_Cost_0.01_0.004.csv
- Optional Supplementary Materials(Data, code, and results)/CSICS/.218NewHS300_Performance_NB_Cost_0.01_0.005.csv
- Optional Supplementary Materials(Data, code, and results)/CSICS/.218NewHS300_Performance_NB_Cost_0.01_0.csv
- Optional Supplementary Materials(Data, code, and results)/CSICS/.218NewHS300_Performance_NB_Cost_0.02_0.001.csv
- Optional Supplementary Materials(Data, code, and results)/CSICS/.218NewHS300_Performance_NB_Cost_0.02_0.002.csv
- Optional Supplementary Materials(Data, code, and results)/CSICS/.218NewHS300_Performance_NB_Cost_0.02_0.003.csv
- Optional Supplementary Materials(Data, code, and results)/CSICS/.218NewHS300_Performance_NB_Cost_0.02_0.004.csv
- Optional Supplementary Materials(Data, code, and results)/CSICS/.218NewHS300_Performance_NB_Cost_0.02_0.005.csv
- Optional Supplementary Materials(Data, code, and results)/CSICS/.218NewHS300_Performance_NB_Cost_0.02_0.csv
- Optional Supplementary Materials(Data, code, and results)/CSICS/.218NewHS300_Performance_NB_Cost_0.03_0.001.csv
- Optional Supplementary Materials(Data, code, and results)/CSICS/.218NewHS300_Performance_NB_Cost_0.03_0.002.csv
- Optional Supplementary Materials(Data, code, and results)/CSICS/.218NewHS300_Performance_NB_Cost_0.03_0.003.csv
- Optional Supplementary Materials(Data, code, and results)/CSICS/.218NewHS300_Performance_NB_Cost_0.03_0.004.csv
- Optional Supplementary Materials(Data, code, and results)/CSICS/.218NewHS300_Performance_NB_Cost_0.03_0.005.csv
- Optional Supplementary Materials(Data, code, and results)/CSICS/.218NewHS300_Performance_NB_Cost_0.03_0.csv
- Optional Supplementary Materials(Data, code, and results)/CSICS/.218NewHS300_Performance_NB_Cost_0.04_0.001.csv
- Optional Supplementary Materials(Data, code, and results)/CSICS/.218NewHS300_Performance_NB_Cost_0.04_0.002.csv
- Optional Supplementary Materials(Data, code, and results)/CSICS/.218NewHS300_Performance_NB_Cost_0.04_0.003.csv
- Optional Supplementary Materials(Data, code, and results)/CSICS/.218NewHS300_Performance_NB_Cost_0.04_0.004.csv
- Optional Supplementary Materials(Data, code, and results)/CSICS/.218NewHS300_Performance_NB_Cost_0.04_0.005.csv
- Optional Supplementary Materials(Data, code, and results)/CSICS/.218NewHS300_Performance_NB_Cost_0.04_0.csv
- Optional Supplementary Materials(Data, code, and results)/CSICS/.218NewHS300_Performance_NB_Cost_0_0.001.csv
- Optional Supplementary Materials(Data, code, and results)/CSICS/.218NewHS300_Performance_NB_Cost_0_0.002.csv
- Optional Supplementary Materials(Data, code, and results)/CSICS/.218NewHS300_Performance_NB_Cost_0_0.003.csv
- Optional Supplementary Materials(Data, code, and results)/CSICS/.218NewHS300_Performance_NB_Cost_0_0.004.csv
- Optional Supplementary Materials(Data, code, and results)/CSICS/.218NewHS300_Performance_NB_Cost_0_0.005.csv
- Optional Supplementary Materials(Data, code, and results)/CSICS/.218NewHS300_Performance_NB_Cost_0_0.csv
- Optional Supplementary Materials(Data, code, and results)/CSICS/.218NewHS300_Performance_RF_Cost_0.01_0.001.csv
- Optional Supplementary Materials(Data, code, and results)/CSICS/.218NewHS300_Performance_RF_Cost_0.01_0.002.csv
- Optional Supplementary Materials(Data, code, and results)/CSICS/.218NewHS300_Performance_RF_Cost_0.01_0.003.csv
- Optional Supplementary Materials(Data, code, and results)/CSICS/.218NewHS300_Performance_RF_Cost_0.01_0.004.csv
- Optional Supplementary Materials(Data, code, and results)/CSICS/.218NewHS300_Performance_RF_Cost_0.01_0.005.csv
- Optional Supplementary Materials(Data, code, and results)/CSICS/.218NewHS300_Performance_RF_Cost_0.01_0.csv
- Optional Supplementary Materials(Data, code, and results)/CSICS/.218NewHS300_Performance_RF_Cost_0.02_0.001.csv
- Optional Supplementary Materials(Data, code, and results)/CSICS/.218NewHS300_Performance_RF_Cost_0.02_0.002.csv
- Optional Supplementary Materials(Data, code, and results)/CSICS/.218NewHS300_Performance_RF_Cost_0.02_0.003.csv
- Optional Supplementary Materials(Data, code, and results)/CSICS/.218NewHS300_Performance_RF_Cost_0.02_0.004.csv
- Optional Supplementary Materials(Data, code, and results)/CSICS/.218NewHS300_Performance_RF_Cost_0.02_0.005.csv
- Optional Supplementary Materials(Data, code, and results)/CSICS/.218NewHS300_Performance_RF_Cost_0.02_0.csv
- Optional Supplementary Materials(Data, code, and results)/CSICS/.218NewHS300_Performance_RF_Cost_0.03_0.001.csv
- Optional Supplementary Materials(Data, code, and results)/CSICS/.218NewHS300_Performance_RF_Cost_0.03_0.002.csv
- Optional Supplementary Materials(Data, code, and results)/CSICS/.218NewHS300_Performance_RF_Cost_0.03_0.003.csv
- Optional Supplementary Materials(Data, code, and results)/CSICS/.218NewHS300_Performance_RF_Cost_0.03_0.004.csv
- Optional Supplementary Materials(Data, code, and results)/CSICS/.218NewHS300_Performance_RF_Cost_0.03_0.005.csv
- Optional Supplementary Materials(Data, code, and results)/CSICS/.218NewHS300_Performance_RF_Cost_0.03_0.csv
- Optional Supplementary Materials(Data, code, and results)/CSICS/.218NewHS300_Performance_RF_Cost_0.04_0.001.csv
- Optional Supplementary Materials(Data, code, and results)/CSICS/.218NewHS300_Performance_RF_Cost_0.04_0.002.csv
- Optional Supplementary Materials(Data, code, and results)/CSICS/.218NewHS300_Performance_RF_Cost_0.04_0.003.csv
- Optional Supplementary Materials(Data, code, and results)/CSICS/.218NewHS300_Performance_RF_Cost_0.04_0.004.csv
- Optional Supplementary Materials(Data, code, and results)/CSICS/.218NewHS300_Performance_RF_Cost_0.04_0.005.csv
- Optional Supplementary Materials(Data, code, and results)/CSICS/.218NewHS300_Performance_RF_Cost_0.04_0.csv
- Optional Supplementary Materials(Data, code, and results)/CSICS/.218NewHS300_Performance_RF_Cost_0_0.001.csv
- Optional Supplementary Materials(Data, code, and results)/CSICS/.218NewHS300_Performance_RF_Cost_0_0.002.csv
- Optional Supplementary Materials(Data, code, and results)/CSICS/.218NewHS300_Performance_RF_Cost_0_0.003.csv
- Optional Supplementary Materials(Data, code, and results)/CSICS/.218NewHS300_Performance_RF_Cost_0_0.004.csv
- Optional Supplementary Materials(Data, code, and results)/CSICS/.218NewHS300_Performance_RF_Cost_0_0.005.csv
- Optional Supplementary Materials(Data, code, and results)/CSICS/.218NewHS300_Performance_RF_Cost_0_0.csv
- Optional Supplementary Materials(Data, code, and results)/CSICS/.218NewHS300_Performance_RNN_Cost_0.01_0.001.csv
- Optional Supplementary Materials(Data, code, and results)/CSICS/.218NewHS300_Performance_RNN_Cost_0.01_0.002.csv
- Optional Supplementary Materials(Data, code, and results)/CSICS/.218NewHS300_Performance_RNN_Cost_0.01_0.003.csv
- Optional Supplementary Materials(Data, code, and results)/CSICS/.218NewHS300_Performance_RNN_Cost_0.01_0.004.csv
- Optional Supplementary Materials(Data, code, and results)/CSICS/.218NewHS300_Performance_RNN_Cost_0.01_0.005.csv
- Optional Supplementary Materials(Data, code, and results)/CSICS/.218NewHS300_Performance_RNN_Cost_0.01_0.csv
- Optional Supplementary Materials(Data, code, and results)/CSICS/.218NewHS300_Performance_RNN_Cost_0.02_0.001.csv
- Optional Supplementary Materials(Data, code, and results)/CSICS/.218NewHS300_Performance_RNN_Cost_0.02_0.002.csv
- Optional Supplementary Materials(Data, code, and results)/CSICS/.218NewHS300_Performance_RNN_Cost_0.02_0.003.csv
- Optional Supplementary Materials(Data, code, and results)/CSICS/.218NewHS300_Performance_RNN_Cost_0.02_0.004.csv
- Optional Supplementary Materials(Data, code, and results)/CSICS/.218NewHS300_Performance_RNN_Cost_0.02_0.005.csv
- Optional Supplementary Materials(Data, code, and results)/CSICS/.218NewHS300_Performance_RNN_Cost_0.02_0.csv
- Optional Supplementary Materials(Data, code, and results)/CSICS/.218NewHS300_Performance_RNN_Cost_0.03_0.001.csv
- Optional Supplementary Materials(Data, code, and results)/CSICS/.218NewHS300_Performance_RNN_Cost_0.03_0.002.csv
- Optional Supplementary Materials(Data, code, and results)/CSICS/.218NewHS300_Performance_RNN_Cost_0.03_0.003.csv
- Optional Supplementary Materials(Data, code, and results)/CSICS/.218NewHS300_Performance_RNN_Cost_0.03_0.004.csv
- Optional Supplementary Materials(Data, code, and results)/CSICS/.218NewHS300_Performance_RNN_Cost_0.03_0.005.csv
- Optional Supplementary Materials(Data, code, and results)/CSICS/.218NewHS300_Performance_RNN_Cost_0.03_0.csv
- Optional Supplementary Materials(Data, code, and results)/CSICS/.218NewHS300_Performance_RNN_Cost_0.04_0.001.csv
- Optional Supplementary Materials(Data, code, and results)/CSICS/.218NewHS300_Performance_RNN_Cost_0.04_0.002.csv
- Optional Supplementary Materials(Data, code, and results)/CSICS/.218NewHS300_Performance_RNN_Cost_0.04_0.003.csv
- Optional Supplementary Materials(Data, code, and results)/CSICS/.218NewHS300_Performance_RNN_Cost_0.04_0.004.csv
- Optional Supplementary Materials(Data, code, and results)/CSICS/.218NewHS300_Performance_RNN_Cost_0.04_0.005.csv
- Optional Supplementary Materials(Data, code, and results)/CSICS/.218NewHS300_Performance_RNN_Cost_0.04_0.csv
- Optional Supplementary Materials(Data, code, and results)/CSICS/.218NewHS300_Performance_RNN_Cost_0_0.001.csv
- Optional Supplementary Materials(Data, code, and results)/CSICS/.218NewHS300_Performance_RNN_Cost_0_0.002.csv
- Optional Supplementary Materials(Data, code, and results)/CSICS/.218NewHS300_Performance_RNN_Cost_0_0.003.csv
- Optional Supplementary Materials(Data, code, and results)/CSICS/.218NewHS300_Performance_RNN_Cost_0_0.004.csv
- Optional Supplementary Materials(Data, code, and results)/CSICS/.218NewHS300_Performance_RNN_Cost_0_0.005.csv
- Optional Supplementary Materials(Data, code, and results)/CSICS/.218NewHS300_Performance_RNN_Cost_0_0.csv
- Optional Supplementary Materials(Data, code, and results)/CSICS/.218NewHS300_Performance_SAE_Cost_0.01_0.001.csv
- Optional Supplementary Materials(Data, code, and results)/CSICS/.218NewHS300_Performance_SAE_Cost_0.01_0.002.csv
[truncated: 510 more entries]
