# Supplementary material for: An Empirical Study of Machine Learning Algorithms for Stock Daily Trading Strategy
Source: Hindawi journal article supplement (doi:10.1155/2019/7816154), 2019-01-01
Supplement: f1 [file 7816154.f1.zip › Optional Supplementary Materials(Data, code, and results)/CSICS/000001_DatasetNew.csv]

	ATR	ADX	OBV	WR	RSI	CMF	BandPer	BandWid	CO	DIS	EOM	FI	MAO	MFI	MI	MOM	NCO	PO	PSY	RMI	ROC	SROC	SONAR	SONSIG	TRIX	VMA	VOS	VROC	Return	Sigma	CCI	RSV	Kvalue	Dvalue	Jvalue	MACD	AD	VOLA	NBIAS	Ret	SMA_5	SMA_10	EMA_5	EMA_10	Label
2009-06-25	0.318025806511145	0.71814783532538	0.166928920992447	0.299180327868854	0.651129027924739	0.799655992944066	0.546319849807247	0.643984426015993	0.410382321797751	0.602735375801494	0.566504856621068	0.314958231042772	0.685371981639715	0.663033612368521	0.0887351286053849	0.453403612790858	0.573348801072049	0.510574312199204	0.444444444444444	1.26205209352252e-12	0.716506738289476	0.219539533968302	0.677465898579254	0.659255656693612	0.792922896328551	0.177513284969442	0.496826084452742	0.498557446741363	0.706668464036557	0.429706907262295	0.501747447124373	0.700819672131147	0.823444470636235	0.906077148519248	0.644396165985957	0.762972429794583	0.19890851024948	0.180319703857996	0.381001016748809	0.504249009121368	0.470228980913382	0.48495513924975	0.472333871240703	0.479792346006299	1
2009-06-26	0.310029509411801	0.723311297267657	0.168428571007671	0.274336283185841	0.66945801257432	0.817565093345603	0.549085136402912	0.626481318461278	0.393905799049475	0.603072198445398	0.566287772432939	0.335270975636285	0.683248950412893	0.666370027951248	0.0851704812642068	0.344394433750461	0.503182647620676	0.464177549273545	0.555555555555556	1.262077145492e-12	0.637352501433989	0.238074634028506	0.67868675052842	0.665567449027872	0.779967497546818	0.180734852474955	0.453025870177311	0.503413056792011	0.688698485858231	0.427655339465091	0.497528661069528	0.725663716814159	0.800610598196769	0.880960001592355	0.630103789220312	0.748047057180332	0.200584079940618	0.153679896624777	0.410951344408514	0.546688931267329	0.467744417817012	0.489343472588766	0.471967694867037	0.481144311320249	1
2009-06-30	0.315776847951954	0.733471754902495	0.170239600371734	0.23394495412844	0.687606851355701	0.821167525535465	0.551601894865474	0.592474600132537	0.371187040300498	0.599648469873484	0.581907282549021	0.339395733663467	0.678967206762159	0.668269112328762	0.0810676545232114	0.32472576824843	0.492045162945855	0.457471649238078	0.555555555555556	1.26207272219673e-12	0.624687103950743	0.251366698585057	0.681340994456331	0.671179594836579	0.765337972226617	0.183266699563639	0.425587534378239	0.475605932572769	0.688924199226806	0.4276421212392	0.520953188626749	0.76605504587156	0.799971966182516	0.86398531554289	0.649287162783538	0.736835327799762	0.199168136640663	0.133715254766666	0.439768005732966	0.546295373585019	0.466317115612714	0.488849785088126	0.473690094771276	0.483367679107849	1
2009-07-01	0.322273839345171	0.752619379948713	0.173749807419949	0.0379403794037911	0.781801260141907	0.856445660657967	0.622069551871318	0.555947523616866	0.404825409223849	0.686042587002227	0.605143128134953	0.380918689924182	0.687700179749802	0.677609417058173	0.0791829258178539	0.425698333841208	0.592839399252987	0.487718228588996	0.555555555555556	1.26207826798159e-12	0.720926309829485	0.236564932136883	0.693882179289445	0.678328100447682	0.757707468456328	0.1923261081263	0.453273097741947	0.516394901275968	0.671184846287902	0.402276837000032	0.634006941004524	0.96205962059621	0.870316867194727	0.87799455432252	0.769581772520212	0.748715894742445	0.207235596318039	0.166175957118581	0.574759879222158	0.732473210580745	0.472396365742131	0.49065997259047	0.487620725037532	0.492448691474723	1
2009-07-02	0.309029972274383	0.772116397810555	0.175901123912315	0.0947368421052608	0.783981941394047	0.838365916780866	0.613953799671999	0.51684657291872	0.406197118005099	0.662265094241679	0.599786418079841	0.378152892939642	0.671242227592293	0.675978699277406	0.0806514906522182	0.44465098029791	0.48369204943974	0.53516244129278	0.666666666666667	1.2621265853804e-12	0.61105356783905	0.229438059130468	0.705240471358771	0.686454915184977	0.753512821302629	0.195437287435743	0.435020912930751	0.446701349579381	0.649233497704056	0.401962635248802	0.711288738951561	0.90526315789474	0.896706176589162	0.896834772859481	0.798360430194956	0.754886361950952	0.206606941206626	0.159448715878521	0.556234357976356	0.516790757306546	0.482281755083009	0.493649524677675	0.497265360515645	0.500081740565603	1
2009-07-03	0.310279393696155	0.786730905853599	0.177555673741053	0.0405904059040591	0.801092394277136	0.858716642142143	0.627475163711853	0.462623791356043	0.417160911951827	0.658138243574189	0.564722667950321	0.338250130558692	0.650306285200058	0.713237820676458	0.0840933271482033	0.453084629339139	0.46809957089499	0.582576914449555	0.777777777777778	1.26197184567279e-12	0.595528153596023	0.222766785336838	0.715288676177207	0.695086632690227	0.751994543660406	0.198674212034709	0.405110651578672	0.495441829209166	0.685266998649863	0.38959908424891	0.70263967101608	0.959409594095942	0.933849505412641	0.922767325734487	0.839571219999986	0.760996032591655	0.209861868699379	0.159443413863054	0.548371863203554	0.556834077035239	0.494017350985014	0.498257274683642	0.506466119414106	0.507901219131609	1
2009-07-06	0.288289576672961	0.805833203795482	0.179102798970255	0.188953488372094	0.816066936908486	0.825983110585585	0.637940811054568	0.41932329901393	0.407796443977957	0.653858609847106	0.629127001900171	0.341323773144258	0.637728663226027	0.658920462876021	0.0838855548688548	0.467617838042264	0.505410144555641	0.627794139436241	0.777777777777778	1.26221267452277e-12	0.629566608697066	0.217206064053566	0.727673096057281	0.704617560766273	0.752333164725783	0.198736131139697	0.377008952811885	0.219401780592985	0.585084102527551	0.249191276525247	0.697481642704022	0.811046511627907	0.905042808489667	0.929684656150995	0.7750808231116	0.766426465291662	0.209187180037726	0.182106802703463	0.531818289866014	0.551824133548136	0.50607012515464	0.503221576773403	0.515102799117341	0.51572088349332	0
2009-07-07	0.284291428123289	0.796341584036538	0.176829076652785	0.505813953488375	0.641707486880089	0.785536892309301	0.551125547185478	0.363172708843769	0.370009931458201	0.554544235437769	0.511936141113645	0.31483871141435	0.620039709768932	0.533824318980924	0.0815603556704972	0.40575578933044	0.460303331622616	0.647638734330253	0.666666666666667	1.26936658298977e-12	0.59003353334722	0.238107580259064	0.736704819634477	0.714157070236267	0.746278008261115	0.20221908729448	0.378014039131157	0.316527804363109	0.503857807982575	0.285678811887789	0.555585614722013	0.494186046511625	0.771430693392183	0.886192938882596	0.566912851798692	0.749590769934867	0.205004363029291	0.20194157117826	0.397873567326602	0.348100784323641	0.511197840481192	0.505141472609222	0.511117385311241	0.516583501424201	0
2009-07-08	0.281292816711035	0.772084477278424	0.175178228724242	0.566860465116281	0.612773106985127	0.800650242744225	0.528212782533612	0.291351992435664	0.358281509244726	0.523387473542839	0.519545905201902	0.307933616472882	0.595821097244467	0.555818255696009	0.0807384771927887	0.434408720163212	0.440255859207937	0.617591002064535	0.555555555555556	1.26566938884501e-12	0.571264189506149	0.26157139658433	0.743078119100729	0.723139846662058	0.734464172956434	0.201298195586083	0.358466540814558	0.396865605686254	0.512905190130404	0.281330493182539	0.4807222418537	0.433139534883719	0.660314109075277	0.817194070752269	0.433302447158487	0.729863231896102	0.20657510037336	0.176802384124321	0.363511052071229	0.478494900894558	0.507656016492748	0.506457972610927	0.506583312445646	0.516222847852778	1
2009-07-09	0.275295593886527	0.749560021003034	0.176583021277694	0.543604651162789	0.619608111617631	0.777471539711406	0.530335670267424	0.242985126550161	0.363261814973598	0.519120864488306	0.56683883513017	0.330872361305134	0.572672920632685	0.637253107472325	0.0816852526973817	0.44153470420857	0.443597104610385	0.575509510751686	0.666666666666667	1.26355068499204e-12	0.574331109550573	0.28102899816391	0.749015711321427	0.731584864709042	0.719328411889205	0.196045799706713	0.334155744379862	0.367126912995794	0.531068487888377	0.277266835577136	0.482066775903039	0.456395348837211	0.594633277975849	0.74754829591625	0.389058515885982	0.712738561506852	0.209012183986493	0.165896600289329	0.381591725452445	0.523149365849316	0.504325644682721	0.509858930948664	0.504275694469799	0.516334027421219	1
2009-07-10	0.270297908199437	0.73266775650617	0.177878719972156	0.508720930232563	0.630256277120289	0.776203262757387	0.536884684540296	0.215210434728007	0.360014538877022	0.518917986354536	0.584377721651075	0.33531856610859	0.550532737838681	0.715260151902598	0.0811788082569326	0.434952414850424	0.449722721181535	0.523677466925652	0.777777777777778	1.26362575909392e-12	0.579961170216014	0.296387522991067	0.755587496869808	0.739734127960297	0.702801271806618	0.190851474592156	0.310405741644762	0.377325971179185	0.529310695409509	0.277060953458505	0.50868285540311	0.491279069767437	0.563441394910656	0.689888022242724	0.397634890661396	0.698470121297793	0.208950502813154	0.170088415891401	0.402618060994343	0.529234520318095	0.499990875025223	0.513698722620303	0.503809928387728	0.517034382167531	0
2009-07-13	0.266049875365411	0.706061568696408	0.176651144302754	0.697674418604657	0.535944197664115	0.771678444308794	0.430318688008981	0.169080178130516	0.334723700381257	0.464199829633706	0.543468568781771	0.327258588022994	0.531791189067446	0.647859409115169	0.0798735854586587	0.384644080357281	0.451393343882758	0.453402474401145	0.666666666666667	1.28948586758485e-12	0.582742764197594	0.32344870786537	0.754017242117221	0.745920637319305	0.682058459485241	0.189740147093774	0.288561903873271	0.347842381222316	0.496267207671894	0.293768617229755	0.441873253520168	0.302325581395343	0.474422060500152	0.619398940982935	0.308901822947318	0.674414648787699	0.205619525052258	0.182904211921499	0.359888016381686	0.4096881645162	0.490739842219589	0.515152358038851	0.497689252364787	0.51430653911091	1
2009-07-14	0.257803693981713	0.685424115024788	0.177923510199711	0.488372093023258	0.603766176745784	0.646099296710646	0.540866950347995	0.163853061816851	0.338078811757652	0.512985448423074	0.579319998120065	0.333993209813345	0.522023461364209	0.627108666456439	0.0790966329737161	0.345701566360784	0.493715785647079	0.437498666666739	0.666666666666667	1.26412143729383e-12	0.62229840591213	0.331904978369293	0.753985986739818	0.750863218522501	0.663114153197407	0.163953234307107	0.272935740642881	0.36280717559685	0.532356313318761	0.310612451728941	0.487322934806702	0.511627906976742	0.490647863566387	0.578247862568699	0.390062057271211	0.664721870543266	0.208350618423813	0.187524474191922	0.453443238437961	0.622621747478861	0.491057020487211	0.517977347625843	0.500044677093785	0.515731005388296	1
2009-07-15	0.246309016901407	0.671977540048872	0.179158146419897	0.472560975609754	0.615115662935206	0.546887740323069	0.554610463138285	0.167092017202307	0.332207150880192	0.52090129710399	0.592894978740253	0.342479242282164	0.512978277902033	0.725440393674181	0.0786776735140226	0.350520211639633	0.48870391754341	0.456415455925173	0.666666666666667	1.26258383996792e-12	0.616917879100709	0.337997060650757	0.75368440282451	0.75475334630556	0.646299975455163	0.144393198460745	0.259277820114856	0.350149095664111	0.573355813643468	0.289107619732565	0.526895432701519	0.527439024390246	0.507173928008738	0.556763553351851	0.448139339320115	0.656953793661891	0.207558768029256	0.112432064150291	0.463773781118351	0.530587367372343	0.493171542271355	0.517236816374884	0.502776993306763	0.517556649912333	1
2009-07-16	0.25655427255994	0.666451828120604	0.181557563719189	0.305993690851736	0.663170636005982	0.550930280724476	0.631083029616282	0.175074691186994	0.34141678956968	0.557464881286499	0.58369847659224	0.34668989793374	0.505966922673956	0.805372210903805	0.0763429249505217	0.364888141359696	0.508751389958088	0.483280951698748	0.666666666666667	1.26232406594018e-12	0.634070678012042	0.33345088057762	0.74849682731325	0.756765658623519	0.634069859089619	0.142686519530159	0.298603093009034	0.538708333333739	0.60376930259277	0.29435039170934	0.58019399080257	0.694006309148265	0.578333145253616	0.568059548262302	0.573286964605392	0.65781748160814	0.209869024727385	0.137426311278795	0.507098250341113	0.597626199975929	0.497929216285682	0.517977347625843	0.509782992640909	0.521995742351858	0
2009-07-17	0.266799528218475	0.661320809901499	0.180308371939871	0.356902356902354	0.649228653799944	0.609802205270157	0.603035480638994	0.179792795419433	0.347307373177128	0.545237639344934	0.564091289944105	0.344273341604015	0.489731977998256	0.747770783029925	0.0778883300970683	0.345787707260672	0.424106506429447	0.509361455656358	0.555555555555556	1.26245897052815e-12	0.555545788280508	0.334307696692643	0.740926421535507	0.756770547574769	0.624113180649407	0.136479794823326	0.282949522019742	0.454735503474982	0.587885145633166	0.296145733910932	0.558576857917876	0.643097643097647	0.607391217362013	0.586051750243289	0.608289580955304	0.654829316141943	0.210727731555318	0.140994957371127	0.483227216439805	0.497482553778278	0.501576766363331	0.517620795542047	0.513649174437303	0.52517068484146	1
2009-07-20	0.270048023915084	0.654812646917287	0.181967782691168	0.286195286195284	0.666975380724631	0.648365226930428	0.62174311720378	0.182411620308738	0.372760890121803	0.554212773613848	0.56218095133907	0.335036843314521	0.476592377170066	0.747514214871357	0.0864966838751991	0.415362155700582	0.433573368403045	0.565177615990461	0.555555555555556	1.26246296612253e-12	0.563903014246516	0.333288230591134	0.73715660167665	0.755975239557447	0.616501683595929	0.13323251656689	0.288690102689863	0.469673336069034	0.58642423192665	0.295990716382208	0.553299971744088	0.713804713804716	0.652293209124488	0.614212246352919	0.661946487316122	0.653568277022353	0.215230476637788	0.126975935967592	0.48905042336248	0.541800280089871	0.509770538276894	0.517072253874671	0.518103759296428	0.528834796938733	0
2009-07-21	0.250557049735435	0.653059210365564	0.179903625884851	0.639676113360329	0.556523247005941	0.578020441820707	0.50328967897911	0.181365184906011	0.3446629317297	0.499215088820008	0.575817186591672	0.322690586210099	0.453265794572837	0.632433817484032	0.0871205863842543	0.387297059553216	0.375658448093975	0.565798194927733	0.555555555555556	1.25454319767037e-12	0.512079668321404	0.349042251767389	0.718785557206153	0.751444247077105	0.606344173543835	0.130127553720552	0.311503724719983	0.400155157167548	0.478122562287348	0.24015203211114	0.515067309156862	0.360323886639671	0.554597839485733	0.597813450009765	0.491201317063578	0.639131360915752	0.209736155086264	0.131059676009928	0.39979862133658	0.401749464522206	0.51029916872293	0.517511087208572	0.514548219966401	0.528125586496929	1
2009-07-22	0.248058206891889	0.642676430620712	0.181736632058826	0.587044534412956	0.569587312640633	0.597517481365282	0.516688196370799	0.177481496556432	0.340986471711054	0.504915032506859	0.546163413735135	0.321714990307947	0.438208329401088	0.538825507366387	0.0873761139092321	0.389954496414213	0.36730533458786	0.560669887643475	0.666666666666667	1.25100861030282e-12	0.504952210497801	0.360282979400074	0.699318528263741	0.743692353268902	0.595357911278706	0.126794738998705	0.320739110081975	0.45827980405891	0.482548401006899	0.240875666306056	0.458146083493581	0.412955465587044	0.508471084979679	0.570274283068087	0.434408689297765	0.627952164977536	0.211635238295834	0.125760841824054	0.4092370090266	0.530494769049484	0.510827799168966	0.518882441377015	0.513339893473362	0.528205495523447	1
2009-07-23	0.252806008294624	0.637456706169959	0.184128406482992	0.55465587044535	0.577906966511944	0.630223477872367	0.521362003746016	0.15908847344559	0.345548200040247	0.504336585769329	0.56953292641136	0.336750858305479	0.439448250999948	0.553702814814444	0.0869541250849769	0.387648632335772	0.432459619935563	0.538820844098494	0.666666666666667	1.25697465511424e-12	0.56335067600715	0.368942712142322	0.683912651384547	0.734224721346276	0.584400671346613	0.124980995139499	0.35146592247933	0.54113809139864	0.47152163516316	0.236966381448765	0.480546763084536	0.445344129554651	0.489414371874992	0.54505400675691	0.427604907253229	0.618665923106667	0.213143012538647	0.15446374096053	0.414377861112129	0.522861854516999	0.508713277384822	0.520253795545457	0.513249439745887	0.528677135399293	0
2009-07-24	0.247058669754471	0.630697005739041	0.182157967412612	0.668393782383421	0.509550837534914	0.622104455454572	0.427326447132396	0.135449724348489	0.326648555636944	0.46730141617041	0.559688296866559	0.326615604256484	0.438163727904728	0.471181256809004	0.0857659750031707	0.398965652406819	0.418537764092037	0.514118635628932	0.555555555555556	1.25972823748737e-12	0.550769557765278	0.386158823789692	0.668710003885865	0.723427584497097	0.571309266037355	0.126020282082096	0.359085540474415	0.521286949962267	0.435979372503447	0.239403746769714	0.442753511183795	0.33160621761658	0.435642964152599	0.50888161154736	0.366297026378397	0.602614599649441	0.210199319338516	0.177187911745073	0.381682419695578	0.440845115596229	0.504642822950343	0.520034378878506	0.509077327970569	0.526727028931805	1
2009-07-27	0.236063761242874	0.626860908603744	0.183836468978248	0.461139896373052	0.55477271870576	0.594227270740225	0.493233295244174	0.108895457410049	0.312243047450266	0.490124957710755	0.578856976595887	0.330866104223548	0.436950567203686	0.563724630218341	0.0822349897420576	0.380533672552366	0.436357739571751	0.477574245179155	0.666666666666667	1.26615429428574e-12	0.567000630065298	0.392471104600519	0.656040454798677	0.712103872240355	0.559300702692384	0.126673238581969	0.353980569567419	0.435803945804866	0.506805618556941	0.201527546927707	0.518501794306344	0.538860103626949	0.47462776241902	0.498802057689371	0.454437726151144	0.594782670946255	0.209337648237547	0.191718718210712	0.429189988388956	0.571721867554575	0.501576766363332	0.522694805965285	0.509871406459778	0.527162786092793	1
2009-07-28	0.243810174057863	0.628589377463818	0.183836468978248	0.478494623655904	0.55477271870576	0.573372695241468	0.478981396705072	0.0880125063113364	0.287003360192053	0.485637872867747	0.574879059856211	0.338891501484045	0.435148666750668	0.656266092779158	0.0773972124183613	0.373447305932123	0.429675248766859	0.478469526148453	0.666666666666667	1.26417534892181e-12	0.560841631410775	0.398488785039887	0.644236393291421	0.700542387011967	0.548258858372334	0.12974259084194	0.388269330762892	0.55766286577887	0.517146900579597	0.198667697043926	0.540750600129444	0.521505376344097	0.494351419955863	0.499183301319265	0.492434929566901	0.587260502817495	0.206139676467271	0.217094399510774	0.43920641864509	0.510803330614803	0.502369712032386	0.523380483049506	0.510400792119251	0.527519314679054	1
2009-07-29	0.289289113810379	0.645478340825122	0.189836671925578	0.456026058631918	0.628229455098279	0.464924622333765	0.640073487947997	0.0973131031642303	0.263702955543184	0.532539560366845	0.600370212805943	0.37013542275037	0.445362409417524	0.718514862796264	0.0699547152915898	0.379570056482641	0.504853270321901	0.489208611503537	0.666666666666667	1.26286350177334e-12	0.629357789563403	0.390351824793561	0.637104049123808	0.689781109005719	0.541558162581776	0.138833141095708	0.520629095607384	0.710951690150648	0.547140610415429	0.217348261284972	0.693001042368823	0.543973941368082	0.515613167664191	0.507092155895194	0.524371749479303	0.590856193525182	0.203660628948536	0.345926093869925	0.496652073311896	0.614727064423145	0.506175851243848	0.525629503885751	0.51701081698622	0.531365792814353	1
2009-07-30	0.334518169278541	0.668808550455758	0.198063926760245	0	0.784624287221145	0.665550432739772	0.93096909467162	0.167511371594024	0.392710990706005	0.687088288035475	0.603430325851093	0.543506881781744	0.462141492348838	0.784805629880169	0.0638019849734965	0.509705497771959	0.597294393122916	0.546315207736625	0.666666666666667	1.2620994808095e-12	0.702361119861974	0.340305082380581	0.647211594034715	0.683314932689126	0.549218906979515	0.16101535547571	0.646338739389104	0.773099601541675	0.653051914181538	0.371488201452012	0.878556208448178	1	0.69444332902441	0.576747477783133	0.789216052261928	0.628351458867867	0.225984957762295	0.36772415706157	0.682503540849685	0.841088791422248	0.522140490714143	0.532815399728389	0.542691643950423	0.5465991392451	0
2009-08-03	0.350010994908519	0.690472316541349	0.193690410687794	0.083969465648856	0.738576269969206	0.72166686054001	0.785274483400487	0.211763415080696	0.505454845283257	0.655540282358814	0.56918318924956	0.49353948621477	0.471712973468084	0.708106404317435	0.0560168111738367	0.480176807090012	0.571678178370827	0.60833661097866	0.666666666666667	1.26200504509051e-12	0.681103075276213	0.313332226475846	0.654959785264255	0.679784643873841	0.562858534321261	0.170941837397047	0.64194187091736	0.682522241224003	0.671070954652475	0.356548231525594	0.732849062650445	0.916030534351145	0.783344888420529	0.655190856282768	0.868146724096326	0.650120282046908	0.237357846285572	0.346942686147642	0.600754245707741	0.466971335861532	0.538792349764284	0.539343045570175	0.556862419029869	0.557386964801435	0
2009-08-04	0.362755093410597	0.697537732794513	0.190668264712529	0.309782608695653	0.635321808087873	0.711879558753679	0.658899478260339	0.231368613623835	0.527230757794601	0.595421050803061	0.552032589257154	0.298493673592333	0.469286652066001	0.639306587927686	0.0543625217590292	0.479740053185349	0.494272659880821	0.646530300146585	0.555555555555556	1.26247201006114e-12	0.615274344101138	0.31139838861782	0.65649366615113	0.677285602636497	0.574659117529425	0.17632688651388	0.607967119413432	0.618973325398335	0.599628286454994	0.372565468826255	0.620580950000286	0.690217391304347	0.761079068138477	0.699470261802666	0.771445171430811	0.652711616768664	0.236269287933401	0.343631680513759	0.481583019131664	0.400629593827346	0.549047780417387	0.543073128908339	0.559069242578838	0.562099987426532	1
2009-08-05	0.375249307628321	0.704800723668205	0.192718384856065	0.277173913043485	0.643409765331403	0.740276259743257	0.645760938097877	0.250643279635166	0.512205834240437	0.594921572498663	0.573166324388731	0.313450724804052	0.469830790321615	0.648396598433921	0.0508327327843212	0.478519815003625	0.505967018789381	0.673783130832356	0.666666666666667	1.26247548555681e-12	0.625259556790213	0.310659851561225	0.657364090605146	0.675470903641077	0.584578930147653	0.175510553121638	0.558013643452377	0.562864927897387	0.598585530724579	0.372613431401671	0.598488043887771	0.722826086956515	0.758009090552912	0.727884606702102	0.731263674217144	0.654270978250498	0.235580545521512	0.303585089354955	0.459507579842118	0.527363928921118	0.559937567605734	0.549134514332854	0.561613104179977	0.566565486491927	0
2009-08-06	0.392241438964426	0.675540989316103	0.190584855058103	0.595108695652177	0.514099850860322	0.713737653406544	0.512428885817468	0.244159416008934	0.478369945422163	0.510033001885045	0.485402126592398	0.313023144684014	0.461811441275761	0.590715522002015	0.0465973822272529	0.411324517990517	0.429118374533116	0.665270285620732	0.555555555555556	1.26724103987803e-12	0.559698396533757	0.334021548473017	0.643985453851331	0.671182811815123	0.586434047284281	0.177272742285121	0.517845185841532	0.464968683772567	0.518470584366117	0.402220058398314	0.485887448468474	0.404891304347823	0.641166888455094	0.70476176627214	0.531279335589239	0.636222141321607	0.234036745985269	0.330258152552413	0.334281615133194	0.345604396694575	0.560941965453203	0.551630378919419	0.552850714371263	0.564277527598945	0
2009-08-07	0.400987388916833	0.645704521597738	0.189160863779211	0.720108695652174	0.470575880435416	0.669031630401039	0.454407015738042	0.235492689891621	0.429450594229703	0.47573905585916	0.550300168679138	0.305045130870737	0.467038736649365	0.587642046677084	0.0430640928241439	0.412293490776212	0.444153978844126	0.578796146269291	0.444444444444444	1.29361457279036e-12	0.573640285901369	0.362246313622004	0.628908615024618	0.664555979061362	0.58055902395212	0.177342833556551	0.466089593334383	0.503905703139472	0.501311223948962	0.407442045461293	0.457485159201594	0.279891304347827	0.51813879374707	0.645053746249888	0.36326330844429	0.613498538129194	0.230734830454496	0.302375551736937	0.294658222114824	0.443471442748008	0.546933258633242	0.552645181004067	0.542897311875119	0.560069567593326	0
2009-08-10	0.422227553086963	0.595554581793904	0.187138057671479	0.875000000000004	0.42014286642673	0.64898522814904	0.386481660287925	0.231380699659954	0.384304956399191	0.436380991497097	0.493085708057104	0.316938261907681	0.467413389218805	0.540899610398029	0.0386738530073205	0.359481946523601	0.405172782482251	0.482184606879251	0.444444444444444	1.25707958459411e-12	0.538514547400025	0.39599167785117	0.610191435791141	0.65528638462741	0.567196243764329	0.179997378683536	0.438716396395737	0.514416214533906	0.464172314920457	0.413741809050282	0.393839766261787	0.124999999999997	0.380194026579973	0.555585279599108	0.201979468034124	0.585689375519118	0.228372560408367	0.320121023580542	0.288217024574108	0.425378793855852	0.531655838742795	0.553358285171657	0.531166642177347	0.553732090412002	1
2009-08-11	0.416230330262456	0.548769472504458	0.188215763547279	0.842391304347828	0.431616147257366	0.68474410212128	0.393434999876267	0.220836153317818	0.366466882816974	0.441402039136144	0.52626561041967	0.323883090308101	0.469268811467456	0.555041038907775	0.036712316028264	0.365910804552832	0.407400279417216	0.417045567360383	0.444444444444444	1.27872389261379e-12	0.540557588108568	0.420353993020941	0.592041294622972	0.644022795531598	0.550347682023614	0.179450229633713	0.388585562977658	0.381513226463677	0.504530492125803	0.401852976108749	0.375922451052453	0.157608695652172	0.300004751071049	0.46706974983626	0.152157031990265	0.564378741373385	0.229636152028842	0.300296747520964	0.343024776790238	0.528975781956009	0.521294682000484	0.553303431004919	0.524418841613992	0.549156271453961	0
2009-08-12	0.434971651589042	0.501189807255514	0.186612749159105	0.947761194029852	0.370663544889207	0.640202651546983	0.308683560914608	0.220996095974448	0.336330201069375	0.39476956318961	0.555455937815626	0.324014656119636	0.473523794220372	0.55870889089298	0.0362622356139414	0.292792761612453	0.393478423573689	0.33218068391551	0.333333333333333	1.25703264862688e-12	0.527499503394006	0.453472247651144	0.577360087422596	0.631899440689482	0.528735520712285	0.180657370869089	0.362636748296952	0.462363108248571	0.463686577968175	0.413657280257936	0.351934208272603	0.0522388059701482	0.208499712969051	0.375115590394364	0.0844100830957363	0.535979064367211	0.226691729029895	0.284666532312768	0.3144011425938	0.401767978217899	0.506545892556073	0.551301253918993	0.513573819652617	0.541806864180438	1
2009-08-13	0.44096887441355	0.45854303659387	0.18830956273302	0.71149144254279	0.45608345448102	0.676955318043623	0.417330713523734	0.22250150491682	0.346811477232305	0.454922619587384	0.555579304599056	0.336391019934823	0.472926134169124	0.550792830667773	0.0355696096587188	0.230656882839121	0.421322135260741	0.315419011711495	0.333333333333333	1.28486536213769e-12	0.55312395777051	0.460725706481996	0.569862871962042	0.620611312597118	0.509607863389466	0.182344701543696	0.34458151133379	0.429570858106659	0.505018481364521	0.434526166248553	0.376398312367391	0.28850855745721	0.232805410186571	0.322563397695333	0.195044925469098	0.526519483641405	0.230921637041491	0.189058123706886	0.437589000305422	0.648404654180909	0.502739753344612	0.549847618500445	0.514388649275398	0.540364135111288	0
2009-08-14	0.446966097238057	0.416296362270008	0.186961351639899	0.85085574572127	0.407832339637706	0.65453298846828	0.355810091063204	0.228033505816298	0.341295346874755	0.419030801257259	0.583492094177228	0.339664035196481	0.467645316999886	0.559915747001597	0.0325667608182891	0.217401297542229	0.389580303937501	0.345394095226612	0.222222222222222	1.37984164030701e-12	0.524230440517836	0.477751345417814	0.55939683901292	0.609361962919098	0.49024063307721	0.178506927012557	0.318244949000359	0.423897683790961	0.499835146501278	0.437172338456661	0.369281752427722	0.14914425427873	0.19868944855378	0.275246113489433	0.185472618396029	0.509885199448249	0.229853278925299	0.157911399602649	0.400805269960059	0.424337668329222	0.498352120642511	0.540302993488085	0.509836800990242	0.536289119605256	0
2009-08-17	0.473953599948342	0.399746312462835	0.185001481703586	0.993999999999997	0.303595435902266	0.60659350716645	0.21432847110111	0.251109349576791	0.30506729003537	0.324578877991533	0.471377886760216	0.300286740493622	0.445371329716796	0.513504413696521	0.0283139606907289	0.17881271008838	0.267624846748211	0.362762224442139	0.222222222222222	1.25938187836827e-12	0.410112328561844	0.521218900122718	0.54095388943536	0.596452492896219	0.464757036164372	0.181101491727588	0.318763055364041	0.507669029451105	0.406365688497696	0.480126633707319	0.303051398206954	0.00600000000000304	0.124260901220492	0.216905359608004	0.110567644664712	0.473585643379003	0.224701438203286	0.200748292224429	0.283596356778744	0.273221458069812	0.489101087836877	0.527576826804939	0.493483548852462	0.525388427919053	1
2009-08-18	0.46545753428029	0.388900679371677	0.186238708185787	0.899430740037952	0.325798190394692	0.584039358007239	0.272285831446658	0.283193672123842	0.299166162285877	0.347253463118079	0.497386334580954	0.309610510699292	0.397576366215476	0.462953540565338	0.0253995671503233	0.185149907729782	0.147896886493883	0.366216850913236	0.333333333333333	1.25905458446657e-12	0.312385375176739	0.548713721100355	0.52872972552643	0.58353333781028	0.43818732345903	0.179560168982467	0.293683699131256	0.363885581774123	0.418606722682544	0.482677538624914	0.296743944236189	0.100569259962048	0.108787646848386	0.172440815178287	0.133910594542214	0.448351525799077	0.22615318516875	0.179907419197638	0.333531049536127	0.548634754978723	0.480431548521882	0.517703076792154	0.484637285405775	0.517637676995112	0
2009-08-19	0.441968411550968	0.386093327264573	0.18500129810087	0.942408376963351	0.284323143289239	0.613730776456605	0.243531597182477	0.317027042248477	0.286429554088832	0.308490403655619	0.552095449638757	0.32823530239146	0.346008116121947	0.345599207854573	0.0227086333882562	0.201861319441983	0.12952003678043	0.385805998872875	0.222222222222222	1.26010218828194e-12	0.290351957881547	0.582791652257676	0.509918456701561	0.569209938083724	0.40950520822247	0.176541857739186	0.273368717198761	0.235918048190216	0.349915733780124	0.473841425012335	0.31055402629845	0.0575916230366494	0.0829543655888288	0.133497241777506	0.13040984984198	0.418238244276299	0.224282809103829	0.198318159646974	0.301532307848941	0.401034952894274	0.472026324429906	0.505690014276599	0.472840223981272	0.507944510465153	1
2009-08-20	0.408983686016176	0.383486500307976	0.186515103195374	0.795202952029522	0.359169157744912	0.631211791453784	0.328553046826981	0.341665687898568	0.307286635081579	0.367181372795976	0.551274388664685	0.336170422190322	0.312556993850587	0.15027184585476	0.0225421418336918	0.263515956591542	0.218063039945256	0.365510828513919	0.333333333333333	1.26066052690177e-12	0.370385728329191	0.589423292546184	0.496099734925678	0.55482158562063	0.385066513117964	0.175376509051253	0.268481905801453	0.218041137196727	0.280504729526429	0.343135335446874	0.333693651495555	0.204797047970478	0.118883103044739	0.120469987353595	0.216139495096143	0.407313769665402	0.228312956198275	0.18808883769548	0.40111928013746	0.640135670794395	0.462986743802686	0.499025233017969	0.471947714726808	0.503974770541328	1
2009-08-21	0.400987388916833	0.356762149458854	0.188597021641378	0.694339622641508	0.404165577285134	0.624342933663705	0.376040106741155	0.349928541276593	0.319161429216391	0.40609651364754	0.625366098716608	0.352802623945912	0.281594635076216	0.264005688104632	0.0237984477896439	0.318988345025037	0.239781135061159	0.368338786359107	0.444444444444444	1.26048931871056e-12	0.39220366555414	0.58096298890073	0.482962165831155	0.540525678474949	0.367268921170432	0.174245277734002	0.288504550440748	0.367031812305495	0.321175591066792	0.362534976139541	0.40116070615855	0.305660377358492	0.17925394851753	0.133519970034653	0.318141718996291	0.407547675126507	0.228848143842365	0.179422433018191	0.479550676463721	0.592655474265458	0.459656371992657	0.495020878846117	0.475911453639928	0.503316707503405	0
2009-08-24	0.384744910433792	0.33194668081324	0.187321973527204	0.722641509433965	0.392831191184549	0.636498034314785	0.36917714955272	0.357102678731596	0.313428967110252	0.398230628468923	0.569070175618354	0.340654540045515	0.266367684218294	0.294588448146563	0.024419782988446	0.304778656097481	0.296582306902745	0.414642882664592	0.444444444444444	1.26038171005897e-12	0.439433728506809	0.576119571538203	0.470507899617427	0.526448590942027	0.354121623755873	0.171706523981174	0.273110759224104	0.348112173550462	0.348372775636418	0.355931299689184	0.411716002909736	0.277358490566035	0.209282319970199	0.153030826088544	0.353208511566402	0.406075011598256	0.227198089028379	0.14049667699711	0.477640537464268	0.486943321868672	0.463409648159515	0.492168462175757	0.477213138871391	0.502016555234481	0
2009-08-25	0.413231718850203	0.339539319329412	0.18490293311075	0.878486055776891	0.288825356060124	0.618688040648564	0.270805669419005	0.388777256846326	0.293449246883484	0.296681820391134	0.415704498382806	0.297412208231986	0.246127525169303	0.185627884964173	0.0240200846586112	0.254395924027878	0.234212392723747	0.423704657199269	0.333333333333333	1.26061654298779e-12	0.37417326174199	0.606430181134074	0.449247819723881	0.510679686029207	0.337397117825959	0.174410104995351	0.308275053808118	0.509314175533668	0.261886689668585	0.40414875348386	0.310392644955073	0.121513944223109	0.173031013305755	0.152986803675413	0.282580841073412	0.380210649833368	0.224341546541413	0.203962857195854	0.316655245589255	0.248175403482868	0.457594713253116	0.484653441332693	0.463957757984987	0.492929163963175	1
2009-08-26	0.40748438031005	0.34918096746895	0.186502449289173	0.77821782178218	0.315256059898261	0.66893148630105	0.313552105400167	0.423081245410031	0.302905303474752	0.324047415348788	0.494659620740754	0.303071072703273	0.235369644246833	0.195367286299933	0.0230950354180661	0.226127964352416	0.281546702591737	0.450264657873455	0.444444444444444	1.2603934237288e-12	0.418799633606034	0.620775426317052	0.435132333104994	0.495072013903137	0.321141664295774	0.170568554177108	0.304292355540027	0.438224072039382	0.329290195964398	0.397956346159116	0.301342361071937	0.22178217821782	0.185066960445513	0.157290658456703	0.300868253870079	0.365185604841145	0.227046323530641	0.201761551739345	0.363032644796622	0.558926010170271	0.456748904539458	0.479853701743145	0.457623677831645	0.486915934821631	0
2009-08-27	0.399488083210706	0.358133926455666	0.185224432147219	0.860566448801744	0.286183633864049	0.682352236493891	0.300982357672838	0.447588901360724	0.289488691224742	0.301551551945332	0.589186974927639	0.331480736824304	0.216315885001066	0.25772315842608	0.0223981987096647	0.227227223895796	0.248134248567273	0.454965953590164	0.333333333333333	1.26039699315045e-12	0.385011897301949	0.640480884699675	0.418775313017112	0.479118112583886	0.30422467612498	0.153328659369787	0.288623458220112	0.466425474263175	0.324384758975366	0.399255548979104	0.32666831160859	0.139433551198256	0.163357607310097	0.152344055121068	0.264493736292499	0.346479321546035	0.224023070825912	0.177792897705134	0.320165709831675	0.427863862243537	0.449242352205743	0.471269024648695	0.449110374122111	0.479558461490015	0
2009-08-28	0.390742133258299	0.377321387935276	0.183573462153858	0.981735159817349	0.232534329563777	0.43837324244083	0.258310967820795	0.456423422429486	0.262484511482476	0.253002844865925	0.48803036691457	0.31318974945034	0.200072020026093	0.268034673494616	0.0230286798557552	0.246544212402431	0.233098644256266	0.408922372118071	0.333333333333333	1.26046182548945e-12	0.362556047533352	0.676547013886409	0.397894589932361	0.461928182033234	0.283622166886692	0.129319765277131	0.292491089338362	0.451539894547981	0.296328991323485	0.416035714648479	0.283293317476548	0.0182648401826512	0.105134761426229	0.128084827225666	0.180169554993174	0.316472488302854	0.220125973003974	0.181731216214442	0.250443430948052	0.334567439583318	0.433859206226088	0.461559837136123	0.434674896784173	0.468562028482629	0
2009-08-31	0.398488546073289	0.403979479181122	0.181989507679208	0.972324723247234	0.18702376607984	0.270343617910619	0.227502737561796	0.481777536761895	0.238298073370436	0.205429300318704	0.472308854190901	0.305017500844568	0.167762696061595	0.265357415275767	0.0227190002341227	0.17826290784144	0.128963162546688	0.31470418825344	0.333333333333333	1.26059856600339e-12	0.254945033624344	0.725712921651461	0.375838201779089	0.443500181686432	0.257749413808711	0.119135551761035	0.293769093123986	0.543737402746015	0.232797719538753	0.428815700139178	0.235244424422643	0.0276752767527662	0.0697173227880969	0.0991609594935412	0.145923763965273	0.277384690857555	0.217199676849745	0.142445828436364	0.205224966709534	0.326371946792054	0.414141290588936	0.453276857958731	0.416380690852451	0.454639047301837	1
2009-09-01	0.39299109181749	0.42139668428073	0.183578894104159	0.821892393320966	0.266373161937066	0.298906192915751	0.296393461267416	0.487685718424516	0.247690548295614	0.284329521049486	0.585535329760656	0.330741867642554	0.144659120946175	0.338893113205998	0.0238958045137145	0.26005623195098	0.205811806802953	0.306893118774988	0.333333333333333	1.26024659500718e-12	0.335541524852445	0.738488473160166	0.357714867809547	0.424915551109956	0.234581351806765	0.113904791060451	0.29603068029005	0.482039482553134	0.318268737481686	0.467481837464489	0.305894267352056	0.178107606679034	0.100421748787668	0.090932642963487	0.215691974202066	0.261993892279729	0.219356045278569	0.160365328731014	0.359341191002163	0.665527722519902	0.407057642612051	0.446584649616732	0.411424913401965	0.447360897347638	1
2009-09-02	0.399737967495061	0.42036974103689	0.185415171061395	0.666048237476807	0.340188546617222	0.352772024469139	0.358728753777534	0.458672273958385	0.280639616914788	0.365407553692662	0.622087375818308	0.358002911274229	0.146220173318839	0.333490161503848	0.0249255232661004	0.267708130140551	0.335563503264619	0.292236038289459	0.444444444444444	1.2602723092416e-12	0.466060768646753	0.721622475727113	0.345567547454472	0.407472558768587	0.219131395048074	0.11312408606725	0.309507829099657	0.495758434507142	0.32345139554432	0.47318439027269	0.36979229634851	0.333951762523193	0.177161446090976	0.113075060669481	0.338666734880434	0.266623393985324	0.22327574135088	0.164079928698974	0.473638748454228	0.66380847996115	0.402934325132968	0.44400650378006	0.415629583081092	0.44567177489914	1
2009-09-03	0.401986926054252	0.40175908116609	0.187148678365514	0.484189723320158	0.40422686594442	0.406118361968903	0.422339655031814	0.432268835014089	0.314679702273394	0.439023986349253	0.660068127628347	0.359036523455947	0.150171865896496	0.411558629324854	0.0265468750511172	0.28707029736404	0.367862208821601	0.333411927074676	0.444444444444444	1.25949531609271e-12	0.50053275862544	0.683810070059204	0.334954648512428	0.391268181424226	0.214025343355423	0.111663672182952	0.316718342044274	0.522777599476912	0.397253907594999	0.497739596467229	0.456096453042149	0.515810276679842	0.293984233575245	0.169895419819425	0.498059237390313	0.286717906734798	0.226283090894223	0.172535464859887	0.573537276133658	0.651794346721861	0.405630340407753	0.441510639193495	0.425673056037838	0.448403145725909	1
2009-09-04	0.368502431950751	0.379070743223315	0.188417568118452	0.396860986547088	0.410411909328019	0.425639619274092	0.436370967054681	0.40026353278812	0.318398965944525	0.455624654462285	0.602708519965435	0.346278069109126	0.166023237703484	0.492158547046351	0.0281019264567808	0.299518228121563	0.409070902118437	0.427517750060533	0.444444444444444	1.2541696900253e-12	0.54175690448235	0.650299277546666	0.312612417717703	0.373568023685539	0.216763693498914	0.111097422970804	0.303063352436839	0.415236445116833	0.475324708592665	0.453862503789383	0.504548328777985	0.603139013452912	0.403397559827093	0.247166839211733	0.618392955774119	0.306009985995987	0.224620913433176	0.157073363021143	0.570489988764389	0.524400794529396	0.413929838410522	0.437835410022069	0.433083801943553	0.451044163438324	1
2009-09-07	0.364504283401079	0.3576181167737	0.18960528867998	0.378923766816144	0.416951597581572	0.4420732726365	0.450537070530316	0.377875337104926	0.313886779281155	0.469971429905236	0.566982510818269	0.334686926728291	0.186067150168484	0.553869917098867	0.0320191854807247	0.395880211189237	0.370089705756565	0.555206926225242	0.555555555555556	1.25604609773957e-12	0.503063724382432	0.62056022501477	0.294225229002205	0.355509728773786	0.225347786364779	0.108048668100707	0.288885750258778	0.476976975566634	0.46744853546428	0.452427907305148	0.513532660858627	0.621076233183856	0.482816303722513	0.327273595976181	0.676832768401479	0.324450223064728	0.223731856188864	0.155840384725302	0.544669477649881	0.524343902903451	0.427779956096672	0.434791003768127	0.438739396481914	0.453611255875359	1
2009-09-08	0.340265507818695	0.339560909188659	0.191080168020745	0.345291479820629	0.429787820558077	0.469023170729553	0.471974142875751	0.356098038298318	0.331258210080891	0.489807108548465	0.558663482615839	0.335746949074508	0.199367316383576	0.547661708302422	0.0372162892933464	0.387578616704072	0.350042233341886	0.61803510323708	0.666666666666667	1.2758588888677e-12	0.484145068098321	0.592428699926179	0.282488909134582	0.338574938961089	0.238525668687538	0.109498680666594	0.291597176812032	0.510894616800547	0.510316696309509	0.441436064446293	0.511106630242414	0.654708520179371	0.547905619975223	0.40411167167638	0.711267674385947	0.343224642409216	0.22711818625213	0.0969148322071709	0.504892673221143	0.536040208949929	0.438141112838982	0.436491482936996	0.443850600218104	0.456473341289009	1
2009-09-09	0.331269673581934	0.318503201275438	0.191080168020745	0.345291479820629	0.429787820558075	0.515390576286975	0.480440144061942	0.337047444639836	0.340951131446101	0.495332038084874	0.576826327243684	0.334905650875144	0.210071675510411	0.533596823291199	0.0434635014229981	0.417945280346957	0.358395346848003	0.653056740605103	0.666666666666667	1.25656965110555e-12	0.492118170438974	0.569651906522676	0.271000824388442	0.322591580217057	0.254447439155068	0.10699683573924	0.26795454508023	0.404932360058009	0.467870529781038	0.423499153141326	0.522713051378808	0.654708520179371	0.591298497477029	0.470959436270226	0.715423197945981	0.359436170095189	0.227900830715564	0.0856139860525299	0.465546650508471	0.510803330614803	0.444061773834588	0.437424003771537	0.447258069375565	0.458815047536542	0
2009-09-10	0.318525575079853	0.298949615356018	0.190053594732053	0.389908256880735	0.40700813869901	0.449699830009648	0.466123541959547	0.307560859847219	0.336922302578875	0.485070893247472	0.561132789243294	0.33058358934856	0.238117096422719	0.449000157747606	0.0509610230467989	0.468049860559701	0.431902745701821	0.64418283426678	0.666666666666667	1.25937748332973e-12	0.565218767283419	0.557380774152436	0.265360175387137	0.30860904964606	0.270410985891656	0.104549902795663	0.254534740347772	0.372551322957584	0.427187668499498	0.415757867339716	0.521895073813614	0.610091743119265	0.604117465793614	0.520139720397014	0.681229822935257	0.368952738340713	0.227014514326479	0.0819318182060221	0.418635739595004	0.466933523664348	0.444326089057606	0.438959920440192	0.447205649359914	0.459410644781263	1
2009-09-11	0.338516317828212	0.274486638554053	0.192039582319512	0.0456852791878125	0.50568558114286	0.515445801310249	0.596881012553313	0.278212248708434	0.357041548300332	0.575286066844605	0.612704201974229	0.34992619209271	0.263522108750409	0.539175655052358	0.0598539348566857	0.617794192895575	0.47756643286859	0.633182776608891	0.777777777777778	1.22903283418046e-12	0.609845457245295	0.520901760479459	0.268662685751215	0.298123172601712	0.291659193692935	0.106878315976789	0.293500689269241	0.552835078938167	0.494946091905612	0.453668228757344	0.612188410019882	0.954314720812188	0.736950777599953	0.600749461217454	0.843208869098001	0.396581510630731	0.231065479285622	0.108561697337618	0.522765334518563	0.692474178412399	0.449982434830194	0.446200670449568	0.457003290116223	0.465484023362413	1
2009-09-14	0.299534369468914	0.255190644142185	0.193328612020047	0.0460048426150156	0.520249463764525	0.600280910167498	0.616025509065232	0.279468900575665	0.369039863548194	0.586227888639657	0.604622874841613	0.354343820141022	0.293155342933199	0.645502625607814	0.0690934771915288	0.564358100031072	0.514320132295498	0.604550644881357	0.888888888888889	1.26284021174218e-12	0.647178031517562	0.489434821753983	0.275802148822075	0.291248070030059	0.316322854461867	0.104429192716084	0.290820470318805	0.38471170723986	0.585390748537355	0.379807774631715	0.643919150686691	0.953995157384985	0.825390935205052	0.686329670980158	0.912650958422287	0.422099935369365	0.232453467710417	0.104932288591874	0.518571223962675	0.539583931871904	0.456167411048818	0.456595535046361	0.465144019473167	0.471367235759737	0
2009-09-15	0.280043395289264	0.237833540621535	0.192417033635254	0.074519230769229	0.510937444443236	0.581335140404554	0.599109308158081	0.287523557254479	0.3680161181581	0.577272065136999	0.56961852384199	0.334274806708732	0.33054031718367	0.667424681916775	0.0768516795667692	0.496490991886041	0.563881939098451	0.584542868951361	0.777777777777778	1.26321329808562e-12	0.701271328651437	0.468264499158114	0.28124694467559	0.286902309778846	0.341532014992925	0.103240307065477	0.270117059576963	0.395245113831557	0.565186407990588	0.380114028361244	0.614839616377995	0.925480769230772	0.874055454322283	0.760903430722154	0.917786806295399	0.441069339244429	0.232371016653895	0.0958530712447436	0.487457672544303	0.496445023436782	0.461083674196955	0.464521962139959	0.469766687951428	0.475723730942084	0
2009-09-16	0.283791659554581	0.213661505050235	0.191174262896088	0.221153846153846	0.449636245537613	0.596502816795708	0.530966508429087	0.289522123346918	0.358056732625831	0.527344766623832	0.519385431319829	0.325508199354289	0.376007082574904	0.595668710877731	0.0816046536782143	0.405085822780322	0.58392941151313	0.569523423981681	0.666666666666667	1.26346043842947e-12	0.729808022096805	0.466403144776747	0.286818375674243	0.284606870618184	0.362663626272206	0.103259877899656	0.271623268338614	0.47899420726876	0.560152781965639	0.383960723076336	0.547691135018145	0.778846153846154	0.85355364222329	0.803238171761339	0.826864959366714	0.445965488628868	0.231663269090522	0.0849899958107739	0.413041260596391	0.411769791457916	0.462775291624271	0.468471462145073	0.467395850269317	0.476190405396565	1
2009-09-17	0.262801379668805	0.191216043448314	0.192141446838053	0.170673076923078	0.469919953344147	0.540326802608307	0.551225962371275	0.292231762113222	0.347684807014735	0.544101335205232	0.572055766963293	0.328032959422628	0.409592009335349	0.672889032322351	0.0874535418337282	0.412755733857672	0.550516957488667	0.582554521731809	0.666666666666667	1.26227862947967e-12	0.689612460918572	0.460419338734776	0.288197522449301	0.283062904759947	0.381320319912881	0.101264257321046	0.258897552801385	0.399563242908112	0.626465186817513	0.337783088506549	0.556419421954491	0.829326923076923	0.858112674404071	0.833102683313519	0.799812820104364	0.453665272052133	0.231335217195058	0.0639927964572865	0.426678875638331	0.545239985038073	0.466951472147958	0.470775337148055	0.467692422142773	0.47763866182874	0
2009-09-18	0.273046635327339	0.192805442194475	0.189748036824457	0.423940149625931	0.378894473306969	0.49207501433227	0.451774814721176	0.278629604792576	0.321328629588972	0.472547984565592	0.510937510786476	0.313765546863225	0.432071163501703	0.635659016683871	0.0874528059655616	0.348389485226182	0.448608972714054	0.539629986498442	0.555555555555556	1.26228962448961e-12	0.583129554270924	0.478299067753547	0.287179625510182	0.281611933232628	0.392298509797101	0.10240145989629	0.326026741333573	0.54807987467843	0.632188208623765	0.328333525548579	0.456417997282202	0.57605985037407	0.769705812567811	0.821183962334368	0.641786191848103	0.443209958056298	0.228236570979016	0.118631691343239	0.319867199130873	0.345151704295303	0.460079276349487	0.470144514230572	0.459040808035009	0.473796134339505	0
2009-09-21	0.271547329621212	0.203015333613816	0.187930819560966	0.478378378378378	0.372967130638813	0.568535505283508	0.453775128754079	0.264896850706624	0.334750588932155	0.472857958660473	0.500472264741373	0.310840906540945	0.441669405518765	0.54676632263364	0.0872676844689776	0.335441517285767	0.399604040144841	0.488945159559758	0.444444444444444	1.26267688006429e-12	0.531992424034084	0.493167834889428	0.293985639790398	0.281894062394722	0.397680614416178	0.104380826970611	0.348573714268431	0.50437457840771	0.577341592785024	0.305988764146825	0.336463126393559	0.521621621621622	0.691112092312707	0.784942697654347	0.532164118888028	0.43411833648008	0.232490721140156	0.14687353097206	0.336463060502777	0.498763277688439	0.451885504435925	0.469102285062556	0.452647355187101	0.470296770919113	0
2009-09-22	0.253305776863335	0.212495947074633	0.186374862764217	0.911764705882358	0.315337114970094	0.561135660547788	0.375230923909297	0.26835443585362	0.31687828885641	0.419054366000701	0.569299719981897	0.322039132173783	0.437931800123645	0.459749651149128	0.0844605414859114	0.293188796229649	0.355610975679298	0.428856788425219	0.333333333333333	1.24089293902639e-12	0.485771797569003	0.520397394125427	0.295140737913766	0.282364651848299	0.395720751946475	0.101229855910411	0.354013617934143	0.45741351890822	0.4875838621348	0.299963184888651	0.287740667590029	0.0882352941176421	0.482235060924866	0.685581574874031	0.244486275390481	0.415212929663583	0.228926672465981	0.163703173827653	0.296238812899214	0.386082671345974	0.440414223756938	0.465701326724819	0.442038565036023	0.463828099994576	0
2009-09-23	0.239312256939484	0.225913189679033	0.185280812818177	0.937282229965153	0.299341391993881	0.507313698249686	0.357401357504198	0.275318979500368	0.300942032291301	0.406588096515377	0.534846487170953	0.321131183343055	0.433186200910748	0.381495700120322	0.0810565651083585	0.295197824789435	0.339461622900807	0.386389054837726	0.222222222222222	1.25984258834266e-12	0.468605887884758	0.545180513743183	0.298661577514671	0.2834875576277	0.388446293691781	0.0993844849245836	0.335990347386802	0.411235683344161	0.42912922048131	0.266549822997627	0.257632531260814	0.0627177700348469	0.33377018747462	0.565890239044108	0.0990632980656701	0.397223298514122	0.227577281092989	0.16314821099866	0.315362231769611	0.472973841702428	0.431057464862096	0.461724399636336	0.433088907940441	0.457469119177812	1
2009-09-24	0.26030253682526	0.219573614561677	0.187397982985602	0.655052264808359	0.39131740836864	0.576692736481056	0.451268388463998	0.276369149849443	0.308746732019119	0.470230549739079	0.59952736506872	0.346096606013813	0.428226514515314	0.406582051350916	0.0763903057406906	0.282577741041733	0.376215322327717	0.34591916211656	0.333333333333333	1.25628729670757e-12	0.508137964744297	0.543168464324472	0.302075222978744	0.285109590816889	0.382809183539522	0.102448089467609	0.372656709383857	0.563619801464656	0.471958969502676	0.302574370060856	0.360086843770663	0.344947735191641	0.336697347559621	0.487149856527891	0.199532259174317	0.397928806916185	0.22984285852275	0.226721506568555	0.429405856242374	0.654342428001093	0.424872488643473	0.46068217046832	0.434362829714049	0.456379696794182	0
2009-09-25	0.261801842531387	0.213686866238417	0.186466693660275	0.714285714285712	0.376437774728035	0.650454336434141	0.428124476906889	0.269812553120726	0.320337696224472	0.452882879013689	0.560552901427786	0.346729067773378	0.426380012565935	0.347535527444145	0.0721684119365281	0.263541221093122	0.366748460354119	0.364279282507007	0.222222222222222	1.25823787381599e-12	0.498246057415732	0.544496090574083	0.301517114281424	0.2862888957531	0.377804824749819	0.0998206581205356	0.343882846984908	0.445254777986401	0.458115095295907	0.302901456587245	0.364267536390384	0.285714285714288	0.31726158242434	0.427658969515367	0.233233106104088	0.396359858238703	0.231274834567135	0.165031135435796	0.435795049358111	0.481201177614451	0.423022282082345	0.456156701712459	0.4336925292022	0.454625049210688	0
2009-09-28	0.273546403896049	0.214129174800882	0.185825558471392	0.961672473867596	0.317836879716988	0.677447114850744	0.320468107166629	0.234467244756506	0.316010533433794	0.392006254033281	0.533905762146684	0.327514606602111	0.425844794609593	0.366535771700266	0.0658616082387929	0.227879833077046	0.34168911983577	0.374055182837134	0.111111111111111	1.25989735459263e-12	0.470585525992986	0.56142635466942	0.297947329688076	0.286475528921633	0.36994436646171	0.0963785857458208	0.304681818289661	0.352797519133878	0.410012553886515	0.31855745534892	0.343796584539365	0.0383275261324043	0.21498137221876	0.351175275317093	0.12585911048138	0.383506547510065	0.229921738581655	0.187570091769641	0.371217057851967	0.384157648795134	0.417788840666587	0.449190222536772	0.426899173941827	0.449583873061795	1
2009-09-29	0.271797213905567	0.215049574129028	0.186651755087935	0.848275862068963	0.352624646069857	0.664267926052063	0.343479185085031	0.211397328591987	0.318819976158966	0.412906195177043	0.544423301562386	0.331110959295835	0.413623984606456	0.315915726159201	0.0627431026305677	0.276829477169457	0.297139181136487	0.418265098374343	0.222222222222222	1.25944260925836e-12	0.427962269232586	0.565268250058077	0.304906897103266	0.288100295812471	0.362634853649844	0.0935923099495588	0.282400036306521	0.466908246243413	0.427567648465002	0.324924027131413	0.359855361488826	0.151724137931037	0.187738265739911	0.290378034292289	0.145909824789433	0.379612535115215	0.230811362257424	0.187857551577068	0.421451162659825	0.564921409660604	0.417894566755794	0.44329339961247	0.425051885189478	0.446982748506672	1
2009-09-30	0.272796751042985	0.20805369404848	0.187454044318823	0.755172413793101	0.383524626873729	0.608953229504521	0.373965341298682	0.20013405053241	0.317778666193726	0.433531045922519	0.591785443977317	0.337059374311439	0.392545317425863	0.366806150219311	0.0594530608631616	0.281258957968426	0.302151049240157	0.464279898637861	0.333333333333333	1.25791168712502e-12	0.434366075379295	0.559877651675598	0.311276566619285	0.290750508608762	0.357791225753723	0.0898173971509115	0.263101853131244	0.444738910445599	0.457122062906651	0.328059618416627	0.409046377031159	0.2448275862069	0.203192716667279	0.255410479134959	0.218124432205873	0.382360233275289	0.230582206476087	0.158948233637403	0.44843514905744	0.558747723347391	0.420537718985975	0.439810160024627	0.426233812633689	0.446225682389781	1
2009-10-09	0.266299759649769	0.187280983621962	0.188585740909426	0.396551724137925	0.488518809329906	0.598149652465782	0.528923279945585	0.199573138208857	0.329229260034571	0.513824232883886	0.643873787126705	0.345285791193801	0.380502913408173	0.331969877113514	0.0631722961398825	0.400511977977972	0.365077837652896	0.502415340771363	0.333333333333333	1.25822674591882e-12	0.498748402155987	0.529084346071161	0.325447338607345	0.295874947794584	0.360553819635406	0.0876202889000819	0.268378732923554	0.395226381146301	0.455979059482897	0.326228778075303	0.502724124096631	0.603448275862075	0.342981546136628	0.282425798249842	0.458164260745697	0.403940529401055	0.232712975161358	0.206416511128412	0.54213346985538	0.68911317371946	0.42439672124204	0.438603368356397	0.436318028745657	0.45088764157991	0
2009-10-12	0.265300222512351	0.173687265581724	0.187526484886798	0.41724137931035	0.482345122158615	0.593807395637431	0.517002096650985	0.201511800586564	0.320420125006987	0.508065268580018	0.601555451006048	0.342805100135863	0.372590607953588	0.32038776500355	0.0637185073971829	0.401248854865865	0.395705920508653	0.52590425384722	0.333333333333333	1.25904977646405e-12	0.528491867188311	0.507024803713728	0.343546334689458	0.303811569698013	0.367743541713025	0.0868549519126049	0.269383205994701	0.452605699651642	0.443459967101062	0.324324660520879	0.55153715270857	0.582758620689651	0.428703760913243	0.331297874939893	0.566484235527688	0.420557985745658	0.230715615622096	0.142000497411809	0.520996834971055	0.500778975774163	0.428837216988744	0.439947295441471	0.442504516536056	0.454397277003949	1
2009-10-13	0.261551958247033	0.157599235578473	0.188084554022505	0.263157894736844	0.495093559592165	0.625587132838878	0.535114290821452	0.202374653377319	0.32140573701809	0.517039708122844	0.542130706208662	0.333026466450011	0.357809672059282	0.329481241657148	0.0682125225550747	0.456014584760408	0.391250926638725	0.577250219735212	0.444444444444444	1.2583491905805e-12	0.52422919010269	0.487207048914347	0.366253221853201	0.314974831914223	0.378129963355878	0.08455620197056	0.238893611614064	0.406465342609504	0.455066069318439	0.325543357702782	0.55582365653301	0.736842105263157	0.541486264924874	0.404483416717327	0.698304211861989	0.43643368713641	0.231691496817423	0.116847991898879	0.5164727627344	0.532483656547686	0.437718208482153	0.441839764193921	0.447790874789968	0.45792896901161	1
2009-10-14	0.255304851138171	0.152737740843165	0.189362351254383	0.199170124481327	0.506263485774812	0.55010502055202	0.546321873786694	0.206272490198367	0.312303213167881	0.524591062285239	0.593596969541438	0.334833709171581	0.350004410195965	0.413809142081774	0.0714158802158786	0.477650917573177	0.45250709235024	0.604158110331932	0.555555555555556	1.16967062183754e-12	0.585676107530602	0.469882370227277	0.38339516622111	0.32753961286924	0.390614082213019	0.0838366888116886	0.26270454401563	0.487734246073653	0.492322187231512	0.31405674768191	0.599006075062516	0.800829875518674	0.639778431357922	0.488661098159901	0.788643066357941	0.4511790237763	0.230263804828346	0.121073455215585	0.493214473615842	0.529035458022796	0.445594802128093	0.445981253782617	0.452298372369249	0.461377142374152	1
2009-10-15	0.261551958247032	0.151228639001416	0.190439955021227	0.175097276264585	0.525986873880208	0.517644284977956	0.566953207048912	0.212233942478123	0.30094912901548	0.537634988722782	0.58004682896468	0.336004186803078	0.348532560816025	0.417981874864354	0.0737514420639086	0.434688184047225	0.466985822427509	0.619820691505449	0.666666666666667	1.21313214484366e-12	0.600142633487242	0.452900658487231	0.395672973113645	0.340194389260557	0.404771865831747	0.0844203491915256	0.269910990417757	0.500322507633147	0.49128727496385	0.313766681540466	0.625474268500031	0.824902723735416	0.713998437668175	0.571500370889778	0.833658185012594	0.466234804242514	0.229010646985191	0.127113544763202	0.481985729545557	0.542055263806765	0.453048491417204	0.451219826706067	0.457001726766663	0.46516324206302	0
2009-10-16	0.243810174057865	0.139917772482555	0.189580551631587	0.217898832684819	0.51136185668888	0.536370309038057	0.546392404278975	0.214835575311233	0.298725562535829	0.526552310078419	0.528311272053741	0.333922652010633	0.359103115453775	0.464803203200935	0.0744669794440178	0.439037311591861	0.500398276451972	0.610701353649596	0.555555555555556	1.26341340631404e-12	0.635785741788829	0.443268618616967	0.401988049844389	0.351657035735234	0.418568571716851	0.0838100404079714	0.262343485251642	0.322837129812335	0.537441137975542	0.273204494811137	0.578501933687862	0.782101167315182	0.748024240274876	0.638976582570276	0.818794023082072	0.476176365691118	0.229295031975579	0.108210045423672	0.444377200893872	0.492746908110994	0.454422930576899	0.453935107959583	0.459154037621597	0.46770235281582	1
2009-10-19	0.245059595479638	0.137411892760328	0.19111202364137	0.00722021660650214	0.586881537807118	0.536232895758573	0.645898842389806	0.219080224972794	0.322593114201348	0.583431519067225	0.591197606889586	0.342144102633869	0.381064892262331	0.584505385409869	0.0804347986917553	0.535576264450107	0.553301328657372	0.61364033108885	0.666666666666667	1.26254319381458e-12	0.688383810197344	0.420271691204268	0.41141742437169	0.362826223757605	0.435301555403092	0.0821506815706928	0.302208506634972	0.456562800504573	0.580490867172526	0.289433743335021	0.60598315103954	0.992779783393499	0.846777066867325	0.719513891636625	0.91441212763006	0.496542264852664	0.233295271271912	0.143635662786517	0.508711722310329	0.630376859829742	0.460026413304883	0.459146253799664	0.467203561252816	0.473537709878087	1
2009-10-20	0.238062835517712	0.142984220072812	0.192426267221101	0.034375	0.617552808634301	0.545529554352677	0.68103830183396	0.22923278409735	0.342498729880157	0.608290654622399	0.601329850229355	0.346937524481674	0.396184799528986	0.689062429581844	0.0873072096952907	0.535321400195695	0.527128239671543	0.604744373413004	0.777777777777778	1.26202965335042e-12	0.658293550379689	0.397130776913013	0.42153967294495	0.373907537508071	0.454563136854904	0.0822427331423455	0.320216603104467	0.456915093340019	0.637198166651856	0.255393910499741	0.643025538787401	0.965625000000001	0.902807606166394	0.793377645243834	0.934764276997247	0.517821319390188	0.235260291427064	0.121938206173977	0.519646020424385	0.56429543854231	0.466740019969544	0.467237243393474	0.475609073728804	0.480038696922807	1
2009-10-21	0.242060984067384	0.15734953011462	0.193700974415318	0.117021276595746	0.637701004865654	0.542136468872406	0.688952835531754	0.248694270624259	0.346107869822949	0.623145725556432	0.599424999273326	0.339499114512321	0.415140435482757	0.769003517982762	0.0908367486947856	0.530342299887877	0.549403209021184	0.601561916175113	0.777777777777778	1.26193648793954e-12	0.680111988874907	0.376822466460001	0.431319659488901	0.384845990713936	0.475259791631165	0.0835684544786036	0.332707102018128	0.507332583410355	0.660840924916329	0.246232830240127	0.653744252435114	0.882978723404255	0.91032050989218	0.845324956585679	0.886895414892246	0.537621675390865	0.23500720357737	0.140495679942945	0.516346196580079	0.546494223041506	0.474087983169448	0.475136243403703	0.483268653357962	0.486525683142349	0
2009-10-22	0.219071629906771	0.169818853396077	0.192718507624172	0.22074468085106	0.578829033402815	0.514481966501351	0.62394546977997	0.265953818581279	0.330012758488314	0.588766208675232	0.552846390864258	0.332150146859947	0.440697092898077	0.672071657311473	0.0910255941983687	0.436879346608022	0.567223184500899	0.590039924065639	0.666666666666667	1.26222316346825e-12	0.702130619758383	0.371927383616402	0.438220023553535	0.395059662251561	0.493209342440288	0.0826181291702051	0.324905256764038	0.363036209202484	0.594267009820196	0.237058528271786	0.606192448474277	0.77925531914894	0.877878081757537	0.868276516908063	0.796019555825367	0.545730888522825	0.23255458977555	0.151622648506664	0.455061672354585	0.450049782498078	0.478369889782341	0.481225055911587	0.484888940596466	0.489852700976176	1
2009-10-23	0.223819431309506	0.187021898071841	0.193814799351899	0.0664893617021255	0.631985586735729	0.53554961472472	0.667485574286629	0.288387047493046	0.327371441045891	0.628259920130895	0.586124393136351	0.335184159643102	0.466396475101754	0.744956344144311	0.0931085451334044	0.4751240688576	0.582815663045647	0.610699114441229	0.666666666666667	1.26203350856889e-12	0.714102041981345	0.358072695604099	0.449171501383852	0.405552363237136	0.511190527885137	0.0830894796712398	0.326626590699837	0.508945216067316	0.633084824899031	0.238435339407389	0.620044669295397	0.933510638297875	0.911946200844011	0.895842821837738	0.829268310832374	0.56072131311917	0.233546171110896	0.142500135468642	0.492265742492906	0.600746641388423	0.486299346472885	0.486052222584504	0.491153587280963	0.495520189760075	1
2009-10-26	0.212574638513553	0.203795338439286	0.193814799351899	0.0787401574803121	0.631985586735729	0.587799294218814	0.642581034729221	0.310875759956022	0.323377232893954	0.618501447321934	0.581255996061114	0.338576724695313	0.487573265574342	0.792096234625968	0.0930616576366905	0.466729194373596	0.567780058734639	0.60466582395981	0.777777777777778	1.26181618129147e-12	0.698080859676482	0.350016278432299	0.453280436293122	0.414817637156971	0.527688386010205	0.0769574348451091	0.303396332916043	0.500201376607855	0.673037422479687	0.190103328734806	0.608407346949401	0.921259842519689	0.930234930161941	0.9208046992546	0.834885699131168	0.571278837785965	0.233330969774727	0.14385975387722	0.464945412374181	0.510803330614803	0.49031693786276	0.491043951757634	0.49533001840396	0.50015722603781	0
2009-10-27	0.220071167044189	0.19859516400214	0.192829625948155	0.339449541284401	0.514867513266829	0.481704633539257	0.551848202947785	0.311007770622234	0.30938813414522	0.549759385054191	0.505304596346938	0.325881327704838	0.497519399263026	0.776573703487409	0.0916777906423954	0.412173787681818	0.464758325492544	0.575829515596629	0.666666666666667	1.26212208421861e-12	0.596287103016984	0.362758900867676	0.451673189891759	0.421889112650874	0.537508677637571	0.0739197846533734	0.303655878511539	0.510961899927207	0.615632225935164	0.238803091208599	0.526668770202475	0.660550458715599	0.848294031671787	0.907945443121483	0.690597929833163	0.565144785258699	0.231459709577736	0.172579145415052	0.379698510543035	0.384488973448854	0.488255279123219	0.493457535094093	0.490873945981964	0.499837784707691	0
2009-10-28	0.224818968446924	0.182164766379047	0.192103943269103	0.42560553633218	0.49916684654781	0.559723275509989	0.5325296682065	0.300959764042858	0.30760588105292	0.531993370157838	0.502550583868219	0.325110293400595	0.508375403477492	0.722279943378551	0.0921448740636645	0.393720351636899	0.461417080090099	0.538590490576592	0.555555555555556	1.26225283106297e-12	0.593241097822836	0.376533662607068	0.450025938150339	0.427197068087627	0.541634187689153	0.0708885954879563	0.286448275907003	0.467647680570005	0.593955948352803	0.241470943803222	0.4645707743752	0.574394463667821	0.762558735652793	0.868506032220504	0.570900511380675	0.557343506477097	0.23213567308651	0.172424832313139	0.375753108348595	0.49166361421627	0.48434341382255	0.495240295513068	0.48683058513214	0.49896703397455	1
2009-10-29	0.222819894172088	0.177199385609315	0.193744046856391	0.381355932203387	0.536128116662462	0.605137400249979	0.557773758347142	0.282864033035725	0.31442379384422	0.54645050649161	0.591746348256205	0.336967957098756	0.519302770086137	0.734161715425121	0.0922365768357081	0.419588589893098	0.472554564764919	0.523883733883448	0.555555555555556	1.26258048922129e-12	0.603494488190156	0.381538928459833	0.453632774678169	0.43220809839828	0.543408341756479	0.0728821441796555	0.33741702400404	0.54153542025773	0.551969161041934	0.19061499113101	0.497410879058128	0.618644067796614	0.721378914535916	0.827387459314689	0.540095540982554	0.555652000959398	0.233378565263832	0.208222198584071	0.418251188302217	0.563167570210047	0.484237687733343	0.497407035099207	0.48708478746228	0.499930423079893	1
2009-10-30	0.22681804272176	0.179037547456023	0.194888675460541	0.266949152542369	0.565142683786917	0.548601111491094	0.574634470046488	0.278097988531646	0.310964471986502	0.558327028612189	0.611414267869513	0.340475356588514	0.527375640927625	0.737307585016967	0.0886805981256276	0.391204703680623	0.481464552504776	0.491402498828112	0.666666666666667	1.26236194680218e-12	0.611511017383617	0.381212291457395	0.457289441599564	0.436992152881068	0.544658718500682	0.0693315608401525	0.344193471545683	0.495527306183751	0.568859813627676	0.190701655970656	0.556451165886825	0.733050847457631	0.735234138402267	0.804963259671064	0.594096507061665	0.557751071050817	0.232399992708311	0.19505759533357	0.442690755783262	0.553025424349244	0.482493207261424	0.500616003853362	0.489667708961482	0.502089777230657	1
2009-11-02	0.288789345241671	0.205040190157498	0.198241884956194	0	0.734543675719775	0.673530146410621	0.778528760255672	0.292157497871866	0.364474524481669	0.7081320570169	0.643420832438739	0.402485114458295	0.548418626911128	0.818526997332853	0.0858582927071201	0.496636482807877	0.596180644655433	0.511888596314718	0.666666666666667	1.26197893224022e-12	0.711990991385233	0.33727414530816	0.478337911741291	0.445281769111469	0.556880131814509	0.0781735782212983	0.477963110581016	0.764445581625642	0.674310630793186	0.353443543101379	0.713652694873519	1	0.840857309516461	0.828040434819661	0.772261600536289	0.594391958836497	0.241498793324883	0.311248802522965	0.645734659481122	0.842747887086595	0.49264291182532	0.507966462196213	0.511501767286862	0.515282577376974	1
2009-11-03	0.291787956653925	0.234344302864577	0.200611211102233	0.0683371298405501	0.745859871385103	0.708109050051617	0.744175606633577	0.320913243084808	0.390825811463426	0.700326472557589	0.636298153312328	0.40415419483628	0.566749841915834	0.834173528298298	0.0852641090868178	0.49411846611994	0.614000620135145	0.568234167610818	0.666666666666667	1.26197159636255e-12	0.72781984782139	0.304540000255515	0.499294572462333	0.456356370719794	0.575424798676878	0.0844829085899666	0.515777859143068	0.58016073791787	0.677901224218996	0.352950889890432	0.776800737119947	0.93166287015945	0.886598519125751	0.859893049740109	0.823111406648652	0.624208083678672	0.24310606139346	0.316245571315741	0.627145598338248	0.540115753620763	0.508184646938786	0.51496036845527	0.527934936498645	0.527143118466104	1
2009-11-04	0.312028583686638	0.26957491934759	0.202805172874746	0.141509433962264	0.769992872840931	0.680839129804405	0.735129034094626	0.347342032051335	0.39294366549889	0.710199653354814	0.617022689321009	0.346288063730234	0.578997412816788	0.848018698120988	0.0830783763615448	0.543990441837989	0.598408141590397	0.636278577716762	0.666666666666667	1.26195361813194e-12	0.709013796765787	0.275732426376604	0.52502112982495	0.470670200694252	0.59827739833442	0.0894763858443339	0.532797933735977	0.59481628196749	0.688360643373319	0.353319473612657	0.733223078727974	0.858490566037737	0.890672602352832	0.882594885029888	0.803733814980934	0.652194759264174	0.242900777668612	0.330991375375796	0.611307251189027	0.574098572721974	0.526792438639262	0.522585097631809	0.543002191930168	0.539183191177663	0
2009-11-05	0.306781013715194	0.302289063224674	0.201533483762805	0.213592233009711	0.719259573790622	0.663566652116206	0.67711034432997	0.355360393674853	0.379240251930381	0.664338673272223	0.548488865730174	0.337941724700944	0.581316690627602	0.821569646004283	0.0801024692585121	0.488632272295405	0.559983819462263	0.678869553409163	0.666666666666667	1.26201477746328e-12	0.675083503624707	0.265091340137603	0.548005069403026	0.486993965755556	0.619612742379249	0.0911900847340943	0.50293731142069	0.544799003947426	0.678811438375603	0.358909256586208	0.641367066067773	0.786407766990289	0.86736198494174	0.889337112025986	0.750170080202022	0.66604568605898	0.241712839398259	0.318769896793313	0.520531274205549	0.462756908555421	0.541805543306691	0.530319535141824	0.549918478337523	0.547256773295669	1
2009-11-06	0.302033212312459	0.334648951937513	0.202865229863716	0.22245762711864	0.722332027190863	0.61333626377419	0.653694049858583	0.370853149758438	0.359955946837402	0.651787053438141	0.574020977627762	0.32959551467217	0.580157051722196	0.821870048634409	0.0759887344256902	0.491347673889257	0.549960083254927	0.721212153004759	0.666666666666667	1.2620842863254e-12	0.665465228467326	0.260228224471435	0.565075475103844	0.503671982459632	0.63803415927873	0.091920431369339	0.48084595214046	0.461474861295552	0.641851974770343	0.351408061988275	0.609003714620605	0.77754237288136	0.848620577873365	0.887084615378949	0.716340009083988	0.675018338883882	0.240480916642295	0.300530154246117	0.477008988200644	0.517710931472845	0.55565566099284	0.536600337233291	0.554976271734854	0.554116343744245	0
2009-11-09	0.312778236539701	0.349969693424967	0.201423632020641	0.273305084745762	0.685784295956095	0.655104163907058	0.618698774846075	0.373620163882203	0.353497807669675	0.619780345308889	0.522469197689744	0.330473026795067	0.586356659716488	0.744445905394207	0.0751080004619115	0.528485387946165	0.558313196761041	0.692935957949006	0.555555555555556	1.26224076631965e-12	0.674641902598888	0.264742084958038	0.580450946757044	0.520274066650962	0.651356324337125	0.0933162961312551	0.467701481769518	0.497874892414241	0.613847203341559	0.355840881696637	0.560391301812791	0.726694915254239	0.817767000741439	0.874474991334104	0.671358847577039	0.675848458155211	0.241501364925241	0.310849431766725	0.415856969163957	0.477511555304259	0.556342880572688	0.542222889323905	0.556202842196089	0.558509940276086	1
2009-11-10	0.321024417923399	0.372261312697294	0.203630586905042	0.074152542372878	0.745697408883244	0.680396306524743	0.665504005474434	0.383587959372275	0.367631343909073	0.66741089177859	0.612171994590204	0.348251671610462	0.590790048454852	0.759961955305777	0.0743201925225898	0.589656211061309	0.57836066917572	0.65922022364274	0.666666666666667	1.26212211970111e-12	0.687519829376721	0.255144986741184	0.603643872145764	0.538472741040455	0.664572306903057	0.0993360967126743	0.49206367066977	0.569412840384956	0.644463886169535	0.367988330590432	0.592864770487318	0.925847457627123	0.869105230186106	0.884551455809795	0.759328354427347	0.687793798169839	0.244999588434819	0.297970328972662	0.487631589439579	0.639284644843416	0.5608891024086	0.552645181004067	0.565422948734552	0.566878253292942	0
2009-11-11	0.321024417923399	0.39296067345017	0.20278623370737	0.118644067796613	0.714202981799243	0.713778633776997	0.631148206238113	0.388269694202947	0.372681023412852	0.636102903617195	0.566361899268828	0.34974509093908	0.590112105710152	0.760301995112306	0.0755913266303184	0.555900123064763	0.566666310267156	0.607279403451867	0.666666666666667	1.26206215172133e-12	0.678075068840213	0.255743203731471	0.622270851814156	0.556980686059628	0.674759832859952	0.0977536664859627	0.446645277407129	0.459632013065426	0.654772414365813	0.361797765621177	0.571988718538089	0.881355932203388	0.887266323948665	0.897807488011434	0.778784530374828	0.691216470239245	0.245798815931488	0.259037984892273	0.457554920236569	0.482539292430173	0.561893500256068	0.562820628933909	0.569692556098664	0.572658622973682	0
2009-11-12	0.321274302207754	0.405376069896538	0.201849808209256	0.209745762711867	0.65166314440509	0.70540993522466	0.58614671001155	0.385693287159147	0.357509020700847	0.592685334305139	0.561516904362957	0.327811645119293	0.597747881887296	0.70912101407298	0.0748732413029272	0.514833553322625	0.587827531149316	0.564845196001027	0.555555555555556	1.26234260307598e-12	0.700683972732648	0.267448125588403	0.635646727724818	0.574622789393116	0.679289722935692	0.0972382487107429	0.413112241669402	0.458672285164224	0.606735156361112	0.367204385228203	0.549982336107562	0.790254237288134	0.866479963649565	0.899161300475553	0.73662724257649	0.684945692985685	0.243862851474712	0.219464921988293	0.421012402647664	0.452147536147019	0.562474993746709	0.570911618527719	0.568695313193195	0.575204370121413	1
2009-11-13	0.322773607913882	0.40960432573807	0.202845317606343	0.158898305084745	0.669536378318345	0.737670082299649	0.593384860957217	0.368957651172401	0.362684245810975	0.594083859113173	0.535275081511133	0.331497054883688	0.609718923510806	0.662030964660042	0.0739756346436882	0.400341793613316	0.607875003563995	0.52880297065452	0.555555555555556	1.262284120641e-12	0.718063334964137	0.275450317526585	0.64362996534063	0.590428955214685	0.680335533186849	0.0977351485253042	0.38851063155794	0.535522667083172	0.617362381043347	0.366344023339694	0.531178117845757	0.841101694915255	0.870981695869841	0.901684563744182	0.742367779496931	0.680959464680324	0.246564126634453	0.20323600133228	0.438036896117205	0.543672445550489	0.564060885084817	0.578920326871423	0.570175776393201	0.578506033441098	1
2009-11-16	0.322773607913882	0.424208310401313	0.204337942894631	0.0224489795918367	0.72468349974288	0.725046627056133	0.637534119065513	0.366700960922732	0.378076216847136	0.634032515482452	0.628134185853038	0.3458993152331	0.628549675274764	0.717710047061925	0.075105338318892	0.430139249671876	0.635161841017307	0.547335500877635	0.555555555555556	1.26192616082559e-12	0.737272500552552	0.270646221134331	0.655799204994813	0.605653822744525	0.682243657820965	0.0975933257720732	0.395652005425747	0.548499869970699	0.69315525722467	0.341104349856984	0.577449198075146	0.977551020408164	0.923250110118175	0.922184506546567	0.8196065528928	0.687010886498939	0.249624262151876	0.101752884127956	0.496784143132223	0.620652202836486	0.57125025915091	0.583006962293382	0.578492498855686	0.585371556912239	0
2009-11-17	0.334018400709833	0.441743667542958	0.202844519459799	0.133843212237094	0.696308346527276	0.682868569550934	0.607000623468687	0.370151690127909	0.372057824046015	0.608096586923447	0.594563798158247	0.341271505225936	0.642741871417094	0.761150613400535	0.0759588509976115	0.397465297166734	0.609545626265218	0.537636245139188	0.444444444444444	1.26194178823476e-12	0.714768371103977	0.273972232666263	0.665286859385677	0.619845143210607	0.682560333940837	0.0982474808563575	0.401260472145602	0.59650038414618	0.691243693299501	0.342131847300624	0.591392496569568	0.866156787762907	0.917875011017363	0.933915982360785	0.795008013517109	0.686323839739682	0.248611175876826	0.126453919766563	0.460787207038552	0.48568040574472	0.572466109176794	0.585996514380586	0.582338624486117	0.590023936450931	0
2009-11-18	0.320274765070336	0.458026499174486	0.202044792710961	0.18661257606491	0.663276609826434	0.677622643073158	0.5787544348544	0.369357982686774	0.358905267688327	0.582179200513754	0.542441092395556	0.328876679586644	0.630164249443062	0.712278789064109	0.0767504972920875	0.404305455928713	0.471997690531177	0.538032248631193	0.333333333333333	1.26202086066991e-12	0.594042407417847	0.283625627211974	0.672244657743169	0.632673284891102	0.679828206432761	0.0965134082782463	0.367991142434797	0.370798772689897	0.664868131562283	0.348440613278477	0.571219626951213	0.813387423935091	0.895238370213657	0.933587282627881	0.751268012844302	0.680083531511175	0.247758665375922	0.0987536918126784	0.440370928711141	0.481467870053706	0.573629096158073	0.587121024798709	0.582936190753056	0.592713214451858	1
2009-11-19	0.316526500805018	0.471888354323236	0.202913932934591	0.158215010141985	0.674138495368292	0.71811564179145	0.57797833720257	0.359803806502537	0.351292374854109	0.578370942617885	0.563852419203451	0.332466408629644	0.616614314848343	0.710505398635472	0.0793907534626219	0.408636303448998	0.468099570894992	0.548105102981579	0.444444444444444	1.26203261008063e-12	0.590495727736054	0.291617735042473	0.678394508044686	0.644239594832897	0.675150754020412	0.0960996723128792	0.344549697655635	0.440221835392431	0.657229562903214	0.348895578192775	0.576057602115126	0.841784989858015	0.890400681721117	0.931626476273164	0.744195547766849	0.674693177972638	0.248151728281422	0.106354861435031	0.447695290437166	0.52950209226139	0.57780527668176	0.589589462301905	0.584585988483147	0.595624487401924	0
2009-11-20	0.255304851138171	0.480816342985621	0.201743464698729	0.457142857142857	0.62123259673296	0.683424698196816	0.5439141447366	0.348993562651086	0.335927909522695	0.546568102749713	0.55588425458081	0.330500621638568	0.596623924178977	0.612260191948958	0.0815360935276805	0.40411586619859	0.423549632195706	0.546669145035969	0.333333333333333	1.26323461383875e-12	0.554107070806425	0.306426500463522	0.682816722068959	0.654430172533423	0.66706442427322	0.0963704780901481	0.343880819893886	0.318404773123148	0.530215401683731	0.184053679916562	0.518506978752027	0.542857142857143	0.779242770482932	0.890300003493725	0.577201644238482	0.663341763054018	0.246696052901369	0.0974402035832	0.409635946171563	0.465203234934328	0.578915400618436	0.590988243553716	0.582646690248032	0.596279834003658	0
2009-11-23	0.246059132617055	0.483099348555297	0.200632894596148	0.481632653061227	0.611894452871439	0.690561940430524	0.531374085417904	0.334923851425086	0.330019669335272	0.533457567105606	0.555146386353789	0.328833267196111	0.579728877357122	0.518020912107177	0.0838748028224218	0.355086196167106	0.439698984974197	0.516058907079902	0.333333333333333	1.26394933314474e-12	0.567450892371398	0.321248389240859	0.68253504102041	0.662522917013794	0.656315175850743	0.097819093243657	0.340293713498137	0.364609427761867	0.518136430341889	0.18356927511991	0.469058892955664	0.518367346938774	0.696295055185957	0.83288603792221	0.484571138745179	0.651422002959059	0.247186620684129	0.085811398751286	0.401881117967229	0.502689131377104	0.575373576629993	0.592880712306167	0.580817501807042	0.596511331855375	0
2009-11-24	0.238812488370776	0.491258975092537	0.198996707544454	0.644897959183671	0.550619670172824	0.666179566569819	0.489696887054719	0.301216557369688	0.305591702941759	0.497311110363093	0.572745972285182	0.32656204557408	0.563716940163231	0.400788802791585	0.0800443239213096	0.345861517294699	0.414639644455849	0.499155582033847	0.222222222222222	1.25398836039457e-12	0.546890425301612	0.341737225916678	0.67823858233881	0.668086243563027	0.641996979311602	0.100195833014466	0.369258374323556	0.437399018303074	0.480152158195716	0.182165077505027	0.444876115558291	0.35510204081633	0.582046970733418	0.753478262684947	0.357381937293642	0.634474922680907	0.243818550789737	0.109766423353172	0.38123980526361	0.456182444423546	0.570721628704874	0.591097951887192	0.576022556506961	0.594669440372394	1
2009-11-25	0.251806471157209	0.478272894490161	0.200358300844805	0.632653061224491	0.55397440946802	0.676516153890593	0.480869910666904	0.243964478188911	0.306255246005252	0.488607613505064	0.49130324449509	0.327513704789414	0.552495203678599	0.398648683844529	0.0796918878546417	0.367959874295137	0.429675248766858	0.48604947219187	0.333333333333333	1.27100914438352e-12	0.559394915991019	0.358657021445143	0.673181689288055	0.671464820177629	0.625880998016013	0.102517434211434	0.376059133549874	0.494084671561793	0.496822554563922	0.176972507516549	0.326946047720723	0.36734693877551	0.510302801667483	0.674710282745337	0.312294377093101	0.619799259716074	0.245551430006223	0.154780950954603	0.396863693460125	0.514932027846532	0.567391256894846	0.589973441469069	0.573094087782364	0.59331478566117	0
2009-11-26	0.272047098189921	0.444726657768571	0.198495964038092	0.92879256965944	0.373240644546831	0.610986578616581	0.283223496970532	0.188702960359077	0.284664912405234	0.391567739957232	0.497004315965543	0.309398928462523	0.522549759021277	0.30830427220781	0.0731027108291483	0.286178094890383	0.296582306902745	0.438509334817145	0.333333333333333	1.25984374570364e-12	0.447678961099587	0.399111883505307	0.662731852699115	0.67195226796816	0.602417372349881	0.103328769784301	0.409284985247632	0.535939678699381	0.430446565378164	0.250926728862912	0.190179851803834	0.0712074303405597	0.35554734526577	0.566482961967337	0.140809785454526	0.586307745816641	0.241873528501716	0.206698311203955	0.292573117876087	0.304967644144593	0.555655660992841	0.586051368547323	0.558180637318897	0.584842973597793	0
2009-11-27	0.269298371062021	0.404676138533371	0.196790711640289	0.934065934065938	0.335142334819951	0.597332210433957	0.182250275045074	0.156744862441681	0.266910165453659	0.363650519554965	0.512075059623046	0.302997849074105	0.490454522239316	0.305067103015758	0.0645463821646238	0.231814234669073	0.286001696461666	0.397385044497106	0.222222222222222	1.25996619483689e-12	0.43735323184238	0.438388002500781	0.647740286858946	0.669163945173601	0.573738719519495	0.105375511616875	0.425638165344733	0.509704224443712	0.422241857687612	0.253703735930495	0.161232035674355	0.0659340659340621	0.250473006578071	0.456502364828856	0.0683005110479706	0.553003685582663	0.239988399603951	0.215364025022239	0.293483472661116	0.451638900103467	0.543602886823214	0.580373962289972	0.544662850670497	0.575880192184281	1
2009-11-30	0.265550106796705	0.375908308220676	0.198029655908971	0.678571428571429	0.444913431979304	0.51751260258168	0.316221760538498	0.14979562270808	0.27986759208054	0.424106498353961	0.602981766492053	0.337109312763608	0.472257111723696	0.260820581356143	0.0611379141168367	0.283552551159989	0.36173659225045	0.386142533445349	0.222222222222222	1.25997769049477e-12	0.50237550848057	0.451073811724539	0.638974748428386	0.665074952406248	0.547567755692288	0.0976566899503807	0.413541343968061	0.39288220375192	0.424737007072598	0.257604962937717	0.309125087700021	0.321428571428571	0.272673915096491	0.391174777234679	0.190206376897259	0.539208632683591	0.242761906056374	0.201776929107342	0.403936544571005	0.646730776521366	0.536783554069347	0.574998253949678	0.543963998644052	0.573269777139082	0
2009-12-01	0.27704478387701	0.344059500622927	0.195683068763673	0.697802197802201	0.437540896667408	0.58115716832606	0.324740777080107	0.164206112833341	0.324745650022043	0.421942641812644	0.556518971511463	0.341694332117115	0.450839473170752	0.237482493976322	0.0600372471647218	0.289927557845049	0.344473491004476	0.383829638673102	0.222222222222222	1.25987406240449e-12	0.488038675158756	0.462191544233838	0.634919927590809	0.660944117493502	0.52386799098551	0.0975736737377722	0.460064236670943	0.643590767216951	0.430566420900918	0.257273623629958	0.328694032190638	0.302197802197799	0.280530937189362	0.350451751214365	0.254534509257764	0.526649855520841	0.248987779825339	0.18349041904218	0.418988252637616	0.500768572774878	0.531708701787399	0.569951670609809	0.54287238718369	0.570778505718356	1
2009-12-02	0.269798139630731	0.324872678884484	0.197182396540087	0.645604395604396	0.45910682236305	0.557364926549554	0.361571743004983	0.167909367480256	0.329924583631421	0.437175899615647	0.597567398857962	0.334014742309762	0.416763929950326	0.311587504946993	0.0583565672503112	0.29273601487994	0.30939041427879	0.380174266418807	0.333333333333333	1.25877193176256e-12	0.460408934306447	0.466988350155481	0.632867959394196	0.657204422851834	0.503708793123742	0.0950376835171645	0.452954441520817	0.557156414243474	0.458040146948869	0.25569487625646	0.404154398206018	0.354395604395605	0.304615821651572	0.331974150062879	0.323731045177983	0.518938509363696	0.246953596677199	0.177714699725859	0.450222169460733	0.537968470680174	0.527479658219109	0.566029597688064	0.543843002221341	0.569705059675458	0
2009-12-03	0.271797213905567	0.294627734288757	0.195691380028288	0.763736263736263	0.410960591420225	0.55917529898976	0.315492196598875	0.1780544679416	0.324122743480035	0.413095498443788	0.537940932891649	0.329792422125276	0.381564429021584	0.303641483566707	0.0565773911406278	0.287365911725249	0.296025432669005	0.420424043699787	0.222222222222222	1.2599384163953e-12	0.448150125748108	0.478861203730578	0.626828296379916	0.652932230753645	0.484788650077411	0.0958384104385026	0.446366941485237	0.546694942660782	0.427719104778482	0.256917039512004	0.372792081624139	0.236263736263737	0.278018969264308	0.310080303281283	0.298222685154868	0.506186907784501	0.245927046853699	0.181915528234344	0.428078850984641	0.448995152386345	0.528642645200389	0.560544181014295	0.54064643109823	0.566643139412941	1
2009-12-04	0.293037378075697	0.283708415763286	0.199168097536762	0.39285714285714	0.548303671837448	0.686814804182317	0.503578751215799	0.178850157875005	0.373974669160734	0.498741809348705	0.594577530442038	0.368827575136423	0.359112035753047	0.366280995712796	0.0557880783771704	0.354961763099999	0.383454687366351	0.490350375654991	0.333333333333333	1.25888933141895e-12	0.521514752223998	0.461661303689729	0.627144251258675	0.649581460965055	0.473688045894732	0.103669335132105	0.528409947520266	0.615911062218383	0.454797953728331	0.29997611929463	0.453917061829917	0.60714285714286	0.394199703499459	0.337311999622248	0.491972444472971	0.515287227011144	0.254830985220082	0.270522130179995	0.534843346920124	0.701016115464537	0.539056664987302	0.55969394142986	0.550582650078369	0.570993565430115	1
2009-12-07	0.287290039535545	0.280152240999703	0.2010217529284	0.270096463022505	0.553525014042792	0.673363629983474	0.507862865780451	0.178710436586616	0.389474757724895	0.500960165054818	0.622106581666546	0.375489033699705	0.336855889068501	0.375759324812758	0.0586957632425749	0.377251379498671	0.378999693496422	0.528622335557395	0.444444444444444	1.25800396338815e-12	0.518006421643775	0.448111313646327	0.615490205376564	0.644430133714868	0.468127362663439	0.105173686948101	0.518447583736399	0.51724780916912	0.465489297357881	0.299781925596099	0.529523609829248	0.729903536977496	0.515978276481675	0.399309401888499	0.654797023305526	0.522745471352716	0.255000529720847	0.293845127293673	0.506407280711483	0.519003192993331	0.544871599893701	0.559172826845852	0.557743119016042	0.574857699721143	0
2009-12-08	0.293537146644407	0.27046576383059	0.19964825345127	0.459807073954981	0.48537602833876	0.601125224505336	0.431373065650439	0.176629375215438	0.374637645837079	0.466551961560026	0.540627937217562	0.326756514576495	0.326900835080545	0.365323780012416	0.0589704407523024	0.346958649834007	0.365077837652896	0.552951490516775	0.444444444444444	1.25909659805332e-12	0.505993744985749	0.449611799584098	0.600368899799046	0.637103285465684	0.463503777795493	0.102130883437152	0.489562587304403	0.56815104312989	0.448978405800469	0.306838575672464	0.492184931822859	0.540192926045019	0.528665874626064	0.445208815007607	0.624295943248583	0.519564597132712	0.252653940255233	0.23835942895504	0.441144226668554	0.429254546722524	0.547937656480712	0.558130597677836	0.557242922623844	0.575023098387174	0
2009-12-09	0.289039229526027	0.256493567119608	0.198756638839862	0.493506493506496	0.472063832484545	0.596505904651509	0.420870777044605	0.175971225471629	0.365251487139631	0.461837591022968	0.539728610172193	0.324824428501365	0.318016217005271	0.322254100942968	0.0641918690620442	0.414863916032442	0.36173659225045	0.569787403460403	0.333333333333333	1.25956248271378e-12	0.503077691504732	0.45333725684937	0.58324707112028	0.627611900303063	0.459101513092867	0.102303426796273	0.444071986917041	0.487379255078442	0.437542728103376	0.305711981622642	0.462963098893727	0.506493506493505	0.524956547093169	0.474472985070106	0.581845139542537	0.514838497740084	0.253114770881989	0.179839156144398	0.422238303699661	0.493962658470002	0.549364958685009	0.556676962259287	0.555836812460553	0.574549034923611	1
2009-12-10	0.292037840938281	0.249951635531143	0.199597435454691	0.415584415584423	0.497456011028178	0.62140039733196	0.457468070874849	0.174932846639708	0.355861354507899	0.478081783375547	0.593164250332582	0.333786184175582	0.317730767428556	0.369637159095647	0.0696561275978234	0.449670821779701	0.397376543209875	0.580572742217817	0.444444444444444	1.25811713340079e-12	0.532555787272519	0.451873697834622	0.57066055319894	0.617350392385267	0.456095776968632	0.101954302056939	0.40321563502133	0.431526062641314	0.462971390519338	0.306351212198857	0.514696153704706	0.584415584415578	0.550618702056367	0.503221366366395	0.597281849185967	0.514103451854961	0.253038721942734	0.122817504593421	0.437085958084754	0.544397494574411	0.554334084877751	0.559858503930074	0.557044697488677	0.575379944106781	1
2009-12-11	0.29478656806618	0.244723675405683	0.200364183604168	0.383116883116881	0.508198383668307	0.587393128796051	0.47298043455165	0.174550875497836	0.348215679048144	0.48581094250779	0.573166812536715	0.335412408819761	0.315848584282088	0.415116787372611	0.0742634352486462	0.404084746832942	0.401274662846065	0.544854687238394	0.555555555555556	1.25711902814107e-12	0.535819410819713	0.449238415829709	0.55931496176156	0.606735868395105	0.454493002935225	0.101119133766803	0.365025817720531	0.42530952291253	0.470057752801471	0.306846069135822	0.539093816374572	0.616883116883119	0.579449738692306	0.532766754890754	0.617937881594872	0.51449349433639	0.253115779002426	0.116686496610847	0.430077782746647	0.524698625972719	0.552695330495038	0.564411399769302	0.55874382575895	0.576567603597063	1
2009-12-14	0.311029046549222	0.222965521948989	0.202123697043971	0.110701107011075	0.561015742192473	0.588341559997993	0.554946631381879	0.165578484549245	0.360746243914957	0.520913769789522	0.554075468717009	0.341570990596395	0.334233321082428	0.50063293318385	0.07699753771858	0.433770186897029	0.51042201265931	0.529699224254284	0.555555555555556	1.26741566901015e-12	0.627977307075407	0.43816565725421	0.552933100092614	0.596891265126763	0.456037644509298	0.102093496878944	0.386413754582985	0.494767943122214	0.510228109538134	0.309679142521314	0.566758896741978	0.889298892988925	0.697030598783834	0.594795350565483	0.772540468149276	0.5215818487472	0.256307484744806	0.181025813647098	0.475243904346643	0.580755927893845	0.553435413119489	0.56781235810704	0.564435323021893	0.580129230988862	0
2009-12-15	0.300034138037624	0.20276152231063	0.201031251874457	0.265682656826572	0.505579646703787	0.5714934999932	0.501699643619497	0.153402525584145	0.347289593017656	0.496993195972043	0.604263977648155	0.336829590314299	0.353349522423101	0.562757691513364	0.077380089234129	0.402372164911356	0.509308264191829	0.52539412954735	0.555555555555556	1.22776733714336e-12	0.628534285442882	0.438372248008815	0.539623818762196	0.586193953551764	0.457437591636042	0.100629593636038	0.368681433546817	0.448857355986282	0.490566615297678	0.314635712051076	0.588932926214835	0.734317343173428	0.719459216881809	0.644222538587196	0.756786277352181	0.520597258207388	0.253944631718989	0.168583113170198	0.439888345984336	0.453305692796146	0.555074167502201	0.570253368526867	0.564475393874129	0.580910426006956	0
2009-12-16	0.274795825317821	0.178507570151314	0.200327563587574	0.350553505535062	0.476519016660493	0.563571489762935	0.472421035030436	0.14361133954992	0.329735131911436	0.485271359404437	0.534249471206558	0.327451298647104	0.36527596255025	0.595721980820821	0.076714409286797	0.413360916866961	0.444710853077866	0.524261204555524	0.444444444444444	1.26308820766109e-12	0.572444377465187	0.443345193952216	0.527229235184267	0.575008395469146	0.457553949924595	0.10027897359485	0.332835038264337	0.33082847742713	0.544498995109306	0.252041078302235	0.539137542931567	0.649446494464939	0.703767621681648	0.671524681307041	0.69333440076634	0.516029861159116	0.252484479226645	0.181346561741506	0.416793398981719	0.478878209510685	0.556131428394274	0.571542441445203	0.562446203130454	0.580381588747899	0
2009-12-17	0.274545941033467	0.163553117966981	0.199530222838883	0.516000000000009	0.4348934805403	0.537327284183212	0.421878683846799	0.130989340905968	0.311409004587215	0.467921074514572	0.524386326824411	0.329113493605984	0.374767160976044	0.62237607027314	0.0725310173146688	0.328595923303554	0.429675248766857	0.503578030914721	0.444444444444444	1.26298413587871e-12	0.559831978603433	0.45384561323767	0.516279000148199	0.563738448725683	0.455293877383521	0.100016845960278	0.308591981999428	0.364224754042802	0.548101718899365	0.249518984027295	0.465929804887477	0.483999999999991	0.633569396921181	0.664453220285543	0.564976358162057	0.507145128368511	0.250915903727177	0.18862596478884	0.386701715505697	0.463025178259953	0.554122632699336	0.573078358113858	0.558054245912828	0.578222299723987	0
2009-12-18	0.265550106796706	0.159301336546629	0.198660504598563	0.748000000000005	0.370424683099051	0.526422335740067	0.32413876738078	0.125100357368818	0.290305184379921	0.435627400477065	0.510968339379088	0.326080173870767	0.376131966764715	0.568164495313004	0.0685490758795393	0.297673945490659	0.386795932768796	0.491675277337098	0.333333333333333	1.25523025776026e-12	0.522962841249808	0.472922366687562	0.501698273001794	0.551631309999816	0.449095122271269	0.0989188590321591	0.293547019523272	0.427915320157022	0.477032590539193	0.231348623722984	0.332977170039241	0.251999999999995	0.503003188031811	0.612732234618927	0.37265079924928	0.49152168133394	0.248629706176952	0.125969081417877	0.346231256897132	0.427635265092883	0.548519149971351	0.569320847692326	0.54994181924225	0.573510225420927	0
2009-12-21	0.270048023915086	0.170719728933509	0.19790161457499	0.799999999999998	0.333232182200889	0.519496856761766	0.277575646966761	0.129694584213686	0.283163538310495	0.417760927374571	0.432045692946261	0.3259943468063	0.381457385430316	0.621589248376822	0.0662409116480785	0.306840226478626	0.390137178171243	0.457904061090282	0.222222222222222	1.25810063018532e-12	0.525507096249987	0.494327698392335	0.481748099665915	0.537716070357844	0.439220043708319	0.097634935057581	0.274714675979581	0.306438113128365	0.462967478081598	0.235769110619951	0.225075465343559	0.200000000000002	0.397183598755491	0.540154221114738	0.253675558990417	0.473706349489484	0.248593579547135	0.147336686473288	0.332632702361278	0.456608995024126	0.538263719318248	0.564383972685934	0.541226209931233	0.567775940495253	0
2009-12-22	0.282042469564102	0.186339479373848	0.197254063664589	0.977777777777784	0.259930196844472	0.546588103122699	0.174445873215413	0.145820309012722	0.273560757096468	0.370260287802589	0.480148698097137	0.325644554063834	0.370271330142773	0.562966454574782	0.061250363401328	0.270552731835155	0.268181720981951	0.412933225165261	0.222222222222222	1.26000879545114e-12	0.419669576291996	0.526624565827406	0.459787028678031	0.521928030416191	0.424007785462507	0.0940255931593459	0.252198917493371	0.351781268657306	0.414280768773584	0.255430988170699	0.217641774361777	0.0222222222222161	0.262447633197792	0.443260997261348	0.10758352898373	0.44744565733273	0.247075305524929	0.163633183199043	0.293466142453284	0.384290699939566	0.525788040791792	0.55876142059532	0.527907282411104	0.558818525314765	0
2009-12-23	0.284541312407646	0.205879573306251	0.196316041521742	0.923295454545455	0.246553626598369	0.510858528611809	0.207359253152162	0.173147157899725	0.268238717622141	0.367058542502281	0.511031640014173	0.326718785720029	0.356311061781525	0.585098760322296	0.0561289659323769	0.251275048018889	0.255373613605908	0.368950317743622	0.222222222222222	1.25982223629682e-12	0.408168882819648	0.553693748719467	0.439788003640765	0.505057713015827	0.405801516816531	0.0924792071212342	0.255025178651544	0.4107373241286	0.425575260656316	0.252059965317501	0.234717246928791	0.0767045454545454	0.192295389556339	0.353409179395125	0.0789388869008797	0.42441332864106	0.246292140669082	0.186274757139181	0.31614233240666	0.484586646571037	0.513629540532959	0.553001733087862	0.517508415703431	0.550626429079298	1
2009-12-24	0.261302073962679	0.216981959504643	0.197608463103332	0.715909090909096	0.348302463747847	0.613796120566564	0.331373545260079	0.187787789761596	0.289070091849095	0.416655549414348	0.584461076194939	0.339888505855931	0.352573456386404	0.514827482297885	0.0520812790067113	0.282789262777427	0.328881012459726	0.352944267436384	0.222222222222222	1.26040805352604e-12	0.472546589698588	0.557786781494112	0.424545612157732	0.488330001876666	0.39024842874741	0.0903985438574026	0.283405098964727	0.328270591195132	0.398914695375329	0.198393924548842	0.325352692656409	0.284090909090905	0.220407463755794	0.303628926345052	0.193659228960864	0.41752472063875	0.249551526911693	0.200644072117463	0.415644305008693	0.621908871671467	0.507127386046713	0.548585972665477	0.517101100467759	0.547630925226214	1
2009-12-29	0.259302999687843	0.214039032740808	0.198678514983228	0.627840909090916	0.387201525535846	0.665324223159396	0.372898340425222	0.187407817066289	0.307251037362328	0.436304127331607	0.617951681810574	0.344237474105209	0.352912427758755	0.480917504086374	0.0488875749863096	0.274952999678861	0.352826604510591	0.364755140958413	0.222222222222222	1.26022199906786e-12	0.493562873861832	0.552986403408716	0.414021238697389	0.472716617304044	0.378798558012795	0.0880795351267846	0.29176732835962	0.39725555368926	0.411193502394743	0.205691142176728	0.388559040853531	0.372159090909084	0.270947303205289	0.28863753370048	0.310240518473208	0.417321986396166	0.250877836778739	0.215542182253951	0.463005395834476	0.55685520675568	0.50533004253019	0.544746180993839	0.519600558890362	0.546754315019885	1
2009-12-30	0.266799528218476	0.194742135466701	0.200275557162308	0.400568181818183	0.476909244080097	0.670040100278179	0.480671856152083	0.187111140106364	0.33418073608356	0.488694771919269	0.618289489759043	0.347196221870586	0.353643892299089	0.598052269484046	0.0494143544180909	0.333140152999443	0.384011561600093	0.412742062152236	0.222222222222222	1.2555636335846e-12	0.521066866818554	0.531725676111267	0.408997436546811	0.459160840444455	0.374310853073829	0.0893868895089354	0.334499691812061	0.507013032558547	0.475057316183386	0.228110882022904	0.461373893426741	0.599431818181818	0.386701062794917	0.320317145962902	0.497804850614147	0.429661526004736	0.254118209451604	0.164243484937316	0.536729469522801	0.62670491826755	0.509717675232291	0.541701774739896	0.528417837184275	0.550099686119842	0
2009-12-31	0.271297445336857	0.173423052164506	0.199331557711513	0.406250000000003	0.474637725884193	0.578552195440282	0.474709222858363	0.185534255867166	0.341918248664636	0.486779534398038	0.600709491332835	0.344092000079605	0.352769702970398	0.669852475950675	0.0514419817850294	0.343206542798032	0.377329070795198	0.481016449953823	0.222222222222222	1.253411927735e-12	0.515472057972104	0.515455817272445	0.406432849978056	0.447772514788692	0.374471399327806	0.0842662811068334	0.326004201516062	0.492326352024964	0.479544970339957	0.227733896004702	0.493310952286828	0.593749999999997	0.461818722522418	0.368480880682897	0.586301161118634	0.439530960071118	0.253947442453676	0.160788576957016	0.520347119214328	0.507955809650325	0.518440077591889	0.539754451820708	0.534117248396578	0.552735242988087	0
2010-01-04	0.278793973867491	0.16173928245637	0.198268170693714	0.593750000000005	0.402760991729316	0.569356458812486	0.388154465639712	0.186401140281029	0.326128057473585	0.445384938125789	0.536467041134619	0.326565530611805	0.339719305134931	0.593900673808046	0.0518375575521393	0.326766698918096	0.312174785447495	0.538381394912546	0.222222222222222	1.25948135576195e-12	0.460216876801103	0.515860383785383	0.400301826690892	0.437362049080465	0.374720190052426	0.0826747357652263	0.327760310141003	0.520190810912343	0.438441080351272	0.238703810403986	0.455841847444495	0.406249999999995	0.444197222376533	0.394245913396866	0.520936337336458	0.437917507316301	0.251254347961757	0.175907289813571	0.436603286857432	0.415401333197756	0.524572190765909	0.536627764316659	0.532017303411402	0.551539964651734	0
2010-01-05	0.294036915213115	0.166607753113553	0.195822040019628	0.710227272727274	0.362662898970849	0.578159637970515	0.341373571561976	0.193662156540234	0.316396584380062	0.420348534536403	0.515434111973094	0.317852773251467	0.329139830197909	0.474543628733094	0.0522271438605901	0.334488093683462	0.312731659681237	0.559008378057694	0.222222222222222	1.25998805978872e-12	0.459142425917424	0.523629651654741	0.400315262771904	0.42903652502496	0.373379793164126	0.0861616946367021	0.414884039681094	0.665214545371583	0.414613501143862	0.241146574977147	0.389506005881962	0.289772727272726	0.390393532301506	0.392052101854175	0.418673278108044	0.430977318719229	0.250965761948418	0.196768421456892	0.383003479312845	0.450090331148126	0.524677916855116	0.533309087229029	0.526952466590044	0.548479928362654	0
2010-01-06	0.263301148237514	0.17159199306531	0.194010438441021	0.818713450292401	0.32590966356474	0.409877418629792	0.308230428242883	0.204861502678619	0.302591028470284	0.401380385872359	0.552477974986462	0.317650853140148	0.310969180580106	0.351336483637251	0.0534066653286634	0.332365898014118	0.303264797707638	0.553537439051287	0.222222222222222	1.26048475970831e-12	0.449643746827554	0.536680074512909	0.400327665308223	0.422378735175396	0.3695684616776	0.080082640432565	0.441173566319946	0.487950496299236	0.372632485257443	0.228512773866931	0.363754495705825	0.181286549707599	0.315353697808252	0.363573586392999	0.306638118404657	0.420019107697394	0.249389025150656	0.186888835514988	0.349063259013597	0.450452816673896	0.521030366777467	0.530484097642038	0.520000422369718	0.543944963491748	0
2010-01-07	0.262301611100095	0.181225997541286	0.192448532511891	0.883280757097793	0.303763838309194	0.389473704508683	0.296040811418264	0.20953271993466	0.291799434969769	0.393214988425353	0.551318645757069	0.323073448331861	0.293039379042657	0.26522720649687	0.0560787582537766	0.363164480816666	0.308276665811309	0.510957001093616	0.222222222222222	1.26044875877018e-12	0.452811421890121	0.5505261274615	0.393902619777476	0.415690364041875	0.363582579055329	0.0790175129151334	0.447073269535354	0.539411079635133	0.378717687201657	0.226930306028302	0.346309175261358	0.116719242902207	0.242014059909409	0.318184042782451	0.218269831302755	0.408199233348678	0.248410986006407	0.155752635054648	0.339043062810605	0.472504644528983	0.511832197016436	0.527988233055473	0.513131047260695	0.538964975928153	0
2010-01-08	0.25530485113817	0.19096048730884	0.191180222973425	0.890410958904111	0.299236130754769	0.443066342807712	0.310116514254373	0.218895769149362	0.293875183803868	0.396705803691952	0.558357304160341	0.328928019157377	0.286500799676015	0.256332936259665	0.0600420542857999	0.369731461679801	0.337791000199584	0.452398809569598	0.222222222222222	1.26040463679455e-12	0.47802514199143	0.560629963593751	0.388080901637406	0.40910543606765	0.356654353274446	0.0786334823936546	0.435543587593425	0.575715044140419	0.386458259676966	0.227280251680797	0.340195463723187	0.109589041095889	0.190546492061005	0.269394901894767	0.176637727012392	0.398813869813899	0.249271362880084	0.124469404963771	0.363241540436422	0.503088903643627	0.502475438121594	0.527659108055046	0.508104528062253	0.534636528296822	1
2010-01-11	0.270297908199439	0.176612644781648	0.191180222973425	0.867219917012449	0.299236130754769	0.391865605169528	0.322891690528382	0.223488390055681	0.278920210275294	0.40322654934039	0.606750024782817	0.332385347127427	0.283878231689941	0.352178530134572	0.0591783686983832	0.330855241310333	0.358395346848003	0.412504987956603	0.333333333333333	1.26029827218149e-12	0.496134816155663	0.566684515654619	0.381670623338375	0.402478485155559	0.34984093639094	0.082484901112905	0.461352070257926	0.623275386126612	0.401714658792453	0.226809326077985	0.391486335129493	0.132780082987551	0.164608284928859	0.22753048858975	0.176447549844277	0.392214287919265	0.246404041394611	0.168519071976905	0.392974895626519	0.510803330614803	0.496607640170592	0.52779624347189	0.504753515263291	0.531095071143915	0
2010-01-12	0.275545478170883	0.171912750998988	0.188578946070497	0.77508650519032	0.284098515440394	0.456549023416481	0.324300268045931	0.231343386052246	0.2976662224637	0.400875661802173	0.532927875342429	0.329492030734989	0.291076913202738	0.319120160859049	0.0583852677964158	0.307272102138743	0.396819668976136	0.396558774409518	0.222222222222222	1.26009243318107e-12	0.530639823315749	0.572776493396897	0.37728074703718	0.396246250425076	0.343121774858226	0.0889121143205363	0.509610782719907	0.655102203587129	0.420673734799081	0.218861691750832	0.322648528270989	0.22491349480968	0.180582421235731	0.205371916631871	0.234260170688412	0.385597849019731	0.250140873915818	0.169807764529441	0.398901085667204	0.487549097668541	0.492114281379284	0.525519795552277	0.501178699353366	0.527435778235459	0
2010-01-13	0.28828957667296	0.182662593136918	0.184468920070761	0.958868894601543	0.165567375829843	0.355161029190837	0.202676188445333	0.25974666201973	0.259220765938891	0.311755112693577	0.53459060154904	0.2752699055828	0.288641671501383	0.26966937710513	0.0542733542783913	0.193648105166906	0.323312270122316	0.372275944636949	0.111111111111111	1.26048475970831e-12	0.459019120614702	0.607983475824449	0.357737330618807	0.387117168319924	0.330389779363936	0.101117851414676	0.598503838334648	0.748165970582035	0.363388626748127	0.291627651120273	0.209680976851998	0.0411311053984575	0.124874209549003	0.170543366056201	0.167558746291359	0.358288900606547	0.242232814060646	0.187876691248306	0.28065924599916	0.270257202417554	0.48185885072618	0.518306472626269	0.485476802132406	0.516875223220001	1
2010-01-14	0.276545015308299	0.195320083649554	0.186759864999883	0.909535452322739	0.167226891329368	0.342129867135043	0.242794188966183	0.284153667265276	0.259665065792536	0.326333328591438	0.550430878811212	0.278927553747973	0.285028950296076	0.250423100169025	0.0510532901155821	0.195012902955104	0.283217325292961	0.371174636526617	0.111111111111111	1.26022955810327e-12	0.422451780222656	0.632461697360798	0.339424521127221	0.375931502653146	0.31512690097833	0.103058017124108	0.590016279068246	0.681424448803538	0.403839175215446	0.2771207441853	0.240210469423982	0.0904645476772608	0.105548047520535	0.140366493175802	0.166194728354122	0.337855677314247	0.244230938761834	0.154472912909268	0.31432948079325	0.512478812417329	0.472977859232771	0.508926410114123	0.475098257810251	0.508285551586849	1
2010-01-15	0.282042469564098	0.195265672679748	0.18913130906061	0.797066014669931	0.242681034882951	0.42347484440442	0.305250961384498	0.284642456330795	0.285773208629756	0.369884982495978	0.580803419990009	0.342808328565851	0.281014815623513	0.327557369920569	0.0517484046467693	0.248211518712424	0.291570438799076	0.380607310020854	0.222222222222222	1.25948945213878e-12	0.432509174255982	0.637899682435143	0.328247778040613	0.364613449092078	0.301723343936924	0.107727423888682	0.5836183334013	0.628752714209647	0.437024685297407	0.289962523013012	0.313584079231439	0.202933985330069	0.133272868445048	0.130230117171407	0.232449775152131	0.330297108837256	0.247834437486724	0.181008198149708	0.38595133410458	0.58695258909767	0.466792883014147	0.500862847603682	0.472291037552482	0.503593632071086	1
2010-01-18	0.274545941033464	0.192628068426977	0.190665917085657	0.787286063569681	0.249129171851642	0.440535146462118	0.32125369218107	0.276541619513741	0.29725125305288	0.383696464740512	0.581627797516047	0.343148989927406	0.264815552144902	0.331139787683054	0.0537296558686556	0.269847854195894	0.249247997034756	0.37882659687412	0.333333333333333	1.26034705527409e-12	0.395963969487881	0.638253405628106	0.318803529374859	0.353556782014714	0.290878923685215	0.110760970104284	0.546905685513685	0.510299265568295	0.402768825515902	0.264993855079015	0.359028448447307	0.212713936430319	0.155287293607202	0.131398205597634	0.27396643677439	0.326462528290507	0.247607304876837	0.159406862539772	0.410824949176646	0.517341101256192	0.460819358973938	0.49471918092906	0.470777106014579	0.499957918712537	1
2010-01-19	0.276045246739591	0.177110709241116	0.193526177245393	0.601466992665035	0.362684692466667	0.526101949442025	0.407359295042534	0.26001341877093	0.335916165105017	0.445045968806676	0.582523194245416	0.35273741916258	0.252951554112659	0.372771267077206	0.0570604270822523	0.330750002429727	0.292684187266559	0.390241002764881	0.444444444444444	1.25988849818365e-12	0.437607140568265	0.618291845841043	0.312922182471821	0.343464575712945	0.286250678936169	0.118292336956029	0.563472749268834	0.637487095708498	0.427766981566691	0.289648943626843	0.419332296219316	0.398533007334965	0.237056590085713	0.161615658498602	0.397029542220805	0.337170879587361	0.253179450043978	0.142635113063524	0.502060860900276	0.632575610543685	0.459656371992658	0.491784483008593	0.476561242367543	0.500842711897238	0
2010-01-20	0.280793048142327	0.162701732854242	0.191368677556853	0.809290953545236	0.285145267858028	0.493666945725506	0.325303933603111	0.254416138564563	0.318568149787946	0.393334417016966	0.565685691811435	0.335956556695786	0.244718117884269	0.301381525616625	0.0557012250447386	0.29748559979952	0.282103576825478	0.434342391294818	0.444444444444444	1.26069063446465e-12	0.423873465785015	0.620284051417639	0.302311323712645	0.333141259728431	0.2822647686106	0.122993807337999	0.549343965020414	0.530525129401651	0.346811540331279	0.278312658823545	0.404882253121387	0.190709046454764	0.21653121613957	0.174371045532395	0.341659647122017	0.333493044680109	0.248045688389694	0.192669208801864	0.427404365388186	0.374302450172754	0.46187661986601	0.487615566336528	0.472819424798249	0.497250123609379	1
2010-01-21	0.301283559459394	0.144757815178029	0.194147998501097	0.477386934673369	0.436727051946732	0.559936231265393	0.475558657661565	0.249983335051102	0.348183954472236	0.489096729833899	0.575183279954152	0.348700472942047	0.249891891462239	0.342849304405061	0.0543770347585092	0.371370472373417	0.377329070795198	0.497120652454665	0.555555555555556	1.25989393287846e-12	0.513166071455517	0.589692810891361	0.29682586306174	0.323719664010314	0.285511527229133	0.130370055959599	0.557227939812186	0.652633192077693	0.416319450457058	0.355294652652808	0.47207061701796	0.522613065326631	0.322687004983518	0.221093032446561	0.4924073645675	0.352997215281549	0.254312632536501	0.238452699251335	0.539431358204566	0.717304053139367	0.47091620049323	0.487697847586635	0.481945210355173	0.500912454344703	1
2010-01-22	0.318025806511144	0.134315195251905	0.198027255139728	0.24848484848485	0.475291275024992	0.623335949338904	0.521827588410721	0.249166605585536	0.390171093466019	0.516341506928281	0.596585418489715	0.378676801706464	0.264931516035443	0.438652726829136	0.0564260953818682	0.393311429785311	0.421879009494483	0.547648657986166	0.666666666666667	1.25748663198314e-12	0.553708727903114	0.556372650120745	0.296235178804786	0.316057159651956	0.29542805048959	0.142168462269547	0.59349426390153	0.686230497828429	0.466361182832538	0.353105570886478	0.552153501262504	0.75151515151515	0.476106370840268	0.307475336184303	0.687576767988593	0.376041394159578	0.259877443462622	0.312970341580358	0.542800559990545	0.571779258515582	0.479638602852828	0.48901434758834	0.491604553732543	0.505940205580716	0
2010-01-25	0.314277542245828	0.124618476749074	0.196462176536329	0.483766233766239	0.393209342809162	0.595876532792874	0.42257106551462	0.249399664988693	0.37926321122682	0.454113845017454	0.560171106555346	0.33435271776661	0.275064976008847	0.453963792298923	0.0552937087393844	0.352617813151823	0.386239058535055	0.58018845612466	0.555555555555556	1.25904185587203e-12	0.520635672428094	0.549926876667199	0.292089858868677	0.309048329240573	0.305133454336072	0.144457738436078	0.548157007038322	0.413381310937515	0.442475045411598	0.369357564830077	0.519389541180554	0.516233766233762	0.493433757900779	0.371301775327019	0.644547419633889	0.381053699651893	0.256395085051183	0.248437254665141	0.432372885326194	0.373531452014985	0.483444742064289	0.487889837170217	0.490088658878911	0.50553418036231	0
2010-01-26	0.324522797904361	0.107376288281352	0.194944275874903	0.529220779220781	0.381242429904576	0.561102452830133	0.412148291966342	0.250306249796692	0.36619461030218	0.448404406059768	0.521951724566705	0.318732191239653	0.283673064806677	0.459893522350233	0.0557802111794551	0.431849134343391	0.381227190431386	0.581032417165237	0.555555555555556	1.258424809742e-12	0.515817421969207	0.546842549010649	0.289354340887699	0.302861322496471	0.31389912018828	0.14528092409159	0.508462699262486	0.455652744574717	0.454613157056774	0.366462812889835	0.473460428953242	0.47077922077922	0.488573242616461	0.412102843413949	0.585967777378936	0.383796734219574	0.256020652043804	0.243591025982578	0.40693875894947	0.488669986993842	0.482493207261423	0.486792753835463	0.487826642091025	0.504491023325216	0
2010-01-27	0.330769905013224	0.0911314579511155	0.193181501849548	0.574675324675331	0.368883918999902	0.524152298548988	0.402967586090271	0.245833828409128	0.340528251835038	0.444233947910394	0.569414278195133	0.328880184768781	0.289587223224254	0.45744084711818	0.0545322084602997	0.422893549421591	0.37343095115901	0.582585835474151	0.555555555555556	1.25802815664816e-12	0.5083703736657	0.546311549847828	0.28922929598659	0.29788520700605	0.321299090841698	0.14780993447166	0.483708478725067	0.502340631832825	0.459716216680203	0.36557936720356	0.479739011955374	0.425324675324669	0.468920792435588	0.432228245468727	0.523430258830103	0.384715222639616	0.253469602861888	0.217237707097314	0.397543278142522	0.48851757156358	0.485294948625415	0.489398326755503	0.485067210680304	0.502926576618285	0
2010-01-28	0.344263656368366	0.0889301993134343	0.192029281666505	0.626623376623374	0.354377111344098	0.504643310433932	0.393818251094357	0.229436488941065	0.333884808371492	0.441953021360459	0.503940537012885	0.329129436059266	0.293137502334654	0.46019561337323	0.0529665657278945	0.385573274563885	0.372874076925272	0.536163565042839	0.444444444444444	1.258424809742e-12	0.507566864829344	0.548144196488723	0.290259347674384	0.294122690317161	0.327029987421154	0.146185965247294	0.441009959627781	0.468331400041468	0.453973548401386	0.365988872741082	0.416802216758407	0.373376623376626	0.437062465658256	0.434175488807351	0.458971329923016	0.383855156261653	0.254600465882559	0.235178172692135	0.373837693488335	0.485144547087861	0.480378685477279	0.491537639258274	0.481797395204055	0.500834055240679	0
2010-01-29	0.33501793784725	0.0793302314091426	0.190971321192463	0.614035087719304	0.349660140356124	0.499194902713581	0.392527332598222	0.194220855436165	0.324433070934806	0.447759134094743	0.598649973408615	0.330846165556415	0.311673884222625	0.442441149904669	0.0501909477656804	0.380317591109643	0.453063966583981	0.481767684784112	0.333333333333333	1.25857203795883e-12	0.58525474674381	0.549288819180791	0.295519342820684	0.292227820170818	0.331514535099873	0.146602017502311	0.401392388167033	0.387809146118832	0.451383944075503	0.36591060781337	0.454588273123833	0.385964912280697	0.42036878862301	0.429463563790532	0.432093651950036	0.38336173946058	0.253847943463286	0.224473897770435	0.385653786082447	0.502743060838844	0.473083585321978	0.492278170509233	0.479170582427461	0.498868079943339	0
2010-02-01	0.333018863572415	0.0772575945311622	0.18972658572402	0.775438596491229	0.306929472370067	0.512419982020938	0.327041506628994	0.167712593460089	0.311665354517495	0.422886221319506	0.528723150158396	0.327408789439213	0.322726135021082	0.466568209201376	0.0455256899181686	0.311702129680477	0.426890877598152	0.451049042244112	0.222222222222222	1.25920692096754e-12	0.559595359583617	0.559065501895917	0.298792872729048	0.291405927476063	0.333090333364684	0.147264089758977	0.376110782033478	0.367846567353882	0.434953792708073	0.370632820143584	0.37940999425514	0.224561403508771	0.350962295378853	0.401334431530659	0.330621574781412	0.376522149840447	0.252575882871048	0.232222789802794	0.368123409309619	0.435691487245177	0.468061596084634	0.491647347591749	0.473307564619397	0.494923561061427	1
2010-02-02	0.309779625127448	0.0703494849865948	0.190986941664928	0.729824561403505	0.325368489885269	0.493087544942792	0.35379529886071	0.152766425508117	0.292418097630713	0.439267706562116	0.582278618642662	0.329327870743672	0.32834592356267	0.568500074428545	0.0451099948052758	0.366399840083872	0.408514027884699	0.441490653067659	0.222222222222222	1.26603142159077e-12	0.541301778849893	0.561961893007829	0.298541799072014	0.290695184548227	0.333762023552506	0.142935028492074	0.356194377941831	0.298103403235725	0.516435248640469	0.303113224680226	0.410217139190121	0.270175438596495	0.321160992879893	0.371852558858723	0.307997335992828	0.374287050902331	0.250230790946002	0.217229557313364	0.39720221136118	0.532207901565044	0.464466909051587	0.489288618422028	0.470560919141	0.492356399546037	1
2010-02-03	0.329270599307098	0.0614920647458082	0.193400131629415	0.310714285714287	0.471932005680402	0.569850335244722	0.588295433711748	0.141324763865222	0.325275200797914	0.52954855440082	0.587804931529625	0.360251243746098	0.344964441107082	0.658735905947136	0.0451838017091964	0.361517907313772	0.4736683132324	0.444466878125351	0.333333333333333	1.26286101234378e-12	0.603515482489278	0.535457917989248	0.303219229131883	0.29111822692842	0.340078103372624	0.145131325062632	0.390078268623525	0.491525957691087	0.579772135876664	0.349142456390235	0.521055782585563	0.689285714285714	0.452620073894172	0.399526108803913	0.531004152814727	0.393303112023432	0.2567788859473	0.208540907041256	0.520903571683432	0.703519510806537	0.468008733040031	0.49257986842629	0.479545668332152	0.496400673588826	0
2010-02-04	0.318525575079855	0.0532673173793635	0.192066754686283	0.510204081632653	0.431745312236993	0.574836371666642	0.52137977447872	0.134907665941225	0.334407559639634	0.503233530047433	0.579706897702371	0.354314290978638	0.352056079028609	0.645711041123925	0.0458885446847319	0.319793324151098	0.41018465058592	0.469832289729552	0.222222222222222	1.26441750869787e-12	0.543009530426339	0.523263257068427	0.301100362853644	0.291007451419586	0.347948166677816	0.144297004720016	0.371190709090708	0.393128251624581	0.536085406662187	0.351248911737594	0.530792970476751	0.489795918367348	0.468230409465571	0.423595202826199	0.532473806477577	0.402968527421186	0.256285513405071	0.14986811949565	0.473617247351436	0.45150775467863	0.470387570047194	0.491263368424585	0.482138789103802	0.497779891202987	0
2010-02-05	0.327521409316616	0.0476622940196105	0.190852814144874	0.591836734693874	0.411033439052125	0.576046454998047	0.488309834229944	0.129291510431018	0.341639299450246	0.490705793806105	0.529355098192386	0.326310922020865	0.372037549398701	0.591444768546006	0.0490280963494612	0.356352298712233	0.44638147577909	0.500398714551297	0.111111111111111	1.26584011059591e-12	0.578046646427774	0.517730808363577	0.298162648217382	0.290296021975046	0.355611372336995	0.144098512786689	0.350734554178387	0.446636924144348	0.523848611625345	0.353302079399917	0.442150710989079	0.408163265306127	0.449162496052559	0.432776401469444	0.484247013248706	0.408121339891836	0.257262847947377	0.126117264341714	0.447026258729079	0.479153216977907	0.471973461385302	0.48830124342075	0.482079793115191	0.497892692570108	0
2010-02-08	0.321524186492109	0.0424576294712679	0.189945468292784	0.771428571428569	0.366995842887278	0.590348672656517	0.401690290338713	0.115777167668662	0.332256195549754	0.461991772625186	0.556466277247251	0.327262307274534	0.374089218231345	0.515946460346339	0.0514407154491806	0.339379985154066	0.349485359108146	0.523367778216607	0.111111111111111	1.25762750242508e-12	0.485403614394202	0.522486095191944	0.29665093593996	0.289406388451868	0.360789004027342	0.140304526143544	0.319902262078451	0.303415540451739	0.461422000720453	0.340380258063346	0.393887596577551	0.228571428571431	0.371605985430537	0.410975167924482	0.359269073146006	0.40577734769834	0.255660563465708	0.117119042151633	0.401299844399065	0.440063970152041	0.473665078812619	0.486573337168512	0.478107427482755	0.495750555899928	1
2010-02-09	0.304532055156004	0.0356672905418782	0.191036316597787	0.591836734693874	0.420117368724311	0.571511056338314	0.509597814081331	0.112505472582829	0.33525076278446	0.496252526383466	0.571345793641391	0.333661727438275	0.370717345106392	0.592693182643796	0.0559569839362809	0.37208712256111	0.35171285604311	0.546783522344719	0.222222222222222	1.26481518640258e-12	0.488666180130913	0.515427647404112	0.299891966783304	0.289381795104132	0.366552217122676	0.134790208999873	0.303680866616496	0.376480698914822	0.527424502169086	0.322851379431483	0.442608933606982	0.408163265306127	0.384746213362537	0.401171780415809	0.396687202567716	0.411837398312509	0.257188291721167	0.109425604724554	0.435667465471791	0.581542691077565	0.476995450622646	0.486436201751668	0.47939221870116	0.496232327322151	1
2010-02-10	0.278544089583137	0.0232502510244072	0.192152085026433	0.477551020408157	0.452308033361548	0.679169133364976	0.567479506123293	0.107959399335875	0.341735447670354	0.512025577067144	0.58110861109699	0.339962742601899	0.377220243275944	0.558563004292839	0.0617714354239533	0.397283417772097	0.416867141390815	0.529431718892006	0.333333333333333	1.25629461362149e-12	0.549315159731911	0.503305503378397	0.306592853610549	0.290782739305522	0.373940945088478	0.123858685404836	0.292328567410931	0.340325235216028	0.473155815367804	0.25917480051981	0.535673090085511	0.522448979591843	0.434771090628728	0.412646233866054	0.48041357411666	0.421834615132768	0.258533888725361	0.0934663787511168	0.4495262933838	0.555027326756912	0.475409559284538	0.487451003836315	0.482751586617692	0.498048413111675	0
2010-02-11	0.246059132617054	0.0117201429010417	0.191540651983374	0.47142857142857	0.432845960792431	0.650144899579236	0.516283950001272	0.0911287978169016	0.334265222136827	0.495221711608172	0.566565203814615	0.334792669054076	0.382144248474288	0.433299508829913	0.068732090491487	0.390481236463464	0.415196518689591	0.519715809149459	0.333333333333333	1.25943872908367e-12	0.547763045802153	0.497494203556257	0.313214660081254	0.293307348146289	0.381237952757151	0.117727074020464	0.256490173875605	0.193782620793249	0.444776644134585	0.252019143440934	0.546622069307912	0.528571428571431	0.470331619090732	0.433098434087161	0.52513375839791	0.427513576835311	0.257243478199937	0.0739238067518502	0.43963458913591	0.484025188726273	0.474933791883105	0.488438378837593	0.48347158353446	0.498670999488036	1
2010-02-12	0.233315034114976	0.00826169597696437	0.19236871311033	0.0937500000000115	0.473399204790658	0.621992003339889	0.604047655923501	0.0842434008843048	0.332821510938672	0.516434860762945	0.577407392632764	0.334519303431549	0.389476734476171	0.507564746375115	0.0773432967408027	0.437961256149067	0.441926481909161	0.52234063752349	0.444444444444444	1.26692773114788e-12	0.573033122276634	0.485382890314616	0.321454412645533	0.297073900724566	0.38990058586653	0.112092446218368	0.239187960384443	0.38359520774904	0.505310384378309	0.227006750181083	0.624048532939885	0.90624999999999	0.630405659993324	0.504363374620265	0.751471359461563	0.437986720649241	0.257922776855551	0.0628287398905751	0.471981928416092	0.564139860095139	0.477312628890268	0.490495410090257	0.486990744867478	0.500906992335195	0
2010-02-22	0.217822208484998	0.00212852480189254	0.191640027074142	0.312500000000002	0.431153838397912	0.606077414365672	0.488939122382938	0.0788722378314503	0.320043270079917	0.488389144355223	0.557595139398198	0.333181476025194	0.396211560426804	0.534481960735108	0.085094365209808	0.409522020134222	0.43134587146808	0.526174462719491	0.444444444444444	1.28297691736923e-12	0.563255598769562	0.483724913808272	0.327151208505557	0.301294889755687	0.39727431764735	0.109150162521058	0.219641665876571	0.368354231324606	0.494888759001299	0.231905822484816	0.55294444779321	0.6875	0.658138423970134	0.561857733896662	0.736350272354124	0.440957916040622	0.256159274175261	0.0582712837670155	0.432200770215085	0.455884694846314	0.480167233298864	0.492854139259978	0.486208301875831	0.500959054564147	0
2010-02-23	0.212824522797908	0.00694400070483743	0.190594844197476	0.656250000000001	0.370585472931316	0.519223957765611	0.324797744293949	0.0816562638647285	0.304866138252559	0.45046683142408	0.521094355929919	0.325598878980269	0.400091890610282	0.562225377449818	0.0886258393977914	0.310430329480105	0.403502159781029	0.506897550428182	0.333333333333333	1.255857482174e-12	0.53646629908325	0.494151776489644	0.330227926917794	0.305323959458978	0.400795304001029	0.102523624998611	0.22441710739023	0.401449273772987	0.474034891581761	0.244384475668663	0.391173536100835	0.34375	0.55251037668694	0.562158909642892	0.530040506987781	0.434775862907752	0.254632163775399	0.0717275927385312	0.372755881929277	0.422574401575684	0.477788396291701	0.493347826760617	0.480770379498029	0.498208615061009	1
2010-02-24	0.203578804276792	0.0158878612225335	0.191612357744885	0.556250000000002	0.392007609293394	0.617333633643471	0.379263909472633	0.0843407067110616	0.310618475144716	0.461033778339061	0.549321559244145	0.329298507173334	0.409502806342624	0.567580349739992	0.093656111269868	0.339581456180958	0.438028362272973	0.502042082769498	0.333333333333333	1.11358695189527e-12	0.570225814516188	0.49803844248811	0.342068157007162	0.311057398550648	0.402666636791742	0.0983617300700925	0.228061818052801	0.463890206712693	0.490626199370388	0.244691918856892	0.365127705260541	0.443749999999999	0.518198313145726	0.550006603443291	0.477765824851137	0.432942210704954	0.256618133677327	0.0580895037378772	0.395258266527858	0.536718954231014	0.474775202749294	0.490961670507528	0.478575292448596	0.496770774994014	1
2010-02-25	0.197831465736639	0.00511516110803854	0.193141482127796	0.281250000000002	0.448693180983986	0.553858196549492	0.515515151458546	0.0827819830143132	0.321412493396462	0.49531118490456	0.600766872738861	0.340345493026478	0.412178896124334	0.581376648984012	0.0984146951503114	0.375452723568757	0.455291463518945	0.504387092777282	0.444444444444444	1.26546062411452e-12	0.58653676523519	0.490865620673431	0.355343102226832	0.318458499370638	0.405725685383476	0.0937974756984567	0.264714191963512	0.541113911920921	0.516049761187784	0.252406120410514	0.506862544303075	0.718749999999999	0.594616849399104	0.569417403064899	0.603401827571873	0.439102554733213	0.2580703600484	0.0888874501219134	0.445442404460148	0.581019444448267	0.474986654927709	0.490824535090683	0.481044936055671	0.497828789091571	1
2010-02-26	0.194582970040031	0	0.195120441164178	0.121428571428574	0.484885607712722	0.511037960657651	0.632930168313552	0.0710930770135255	0.339456154777498	0.519745541041302	0.578138773017698	0.344160607914152	0.402750139793446	0.679495551121126	0.105308614211995	0.418350882151464	0.40461590824851	0.496272697231848	0.555555555555556	1.26288991052831e-12	0.537849279971735	0.478746434031787	0.366724152861568	0.326792215195762	0.410917188566461	0.0868598133286124	0.320568063701435	0.556050720456481	0.55516799285614	0.242369470685921	0.583666324910486	0.878571428571427	0.703268679537524	0.62147496092234	0.752594974184683	0.449179532008673	0.260587466288856	0.0896770082778274	0.471797731877554	0.557819157972737	0.474986654927709	0.492058753842282	0.48537297988162	0.500217911101724	1
2010-03-02	0.214323828504036	0.0232650830359946	0.198129852179039	0.310218978102195	0.55652319017601	0.491172389615434	0.749865126400079	0.10157440840398	0.315428509582638	0.564788213355923	0.618797421676507	0.355789586365182	0.404311192166109	0.715722399646738	0.104853661437263	0.429663556706138	0.46253082855758	0.504742413711	0.666666666666667	1.26253455764489e-12	0.591444555164693	0.455685023090628	0.380611624754389	0.336403395879245	0.420462115498122	0.0921328245710047	0.41442896184083	0.61979796294485	0.581292169296461	0.254837433281762	0.815541953281603	0.689781021897806	0.707537370575806	0.657716821219791	0.717301791428328	0.467952312052266	0.255779496401032	0.127455983503957	0.530920832297621	0.611894976643036	0.480325822432675	0.496309951764453	0.494157894892298	0.505524290338585	1
2010-03-03	0.194582970040031	0.0421950534001154	0.199378682027603	0.240875912408759	0.575482349964857	0.537310511368256	0.740481451713217	0.120954256839283	0.321158222862184	0.57388297772323	0.545218271115242	0.352633886969881	0.409592009335348	0.616112876037789	0.104818039409744	0.423799552002091	0.484248923673481	0.543355793703745	0.666666666666667	1.26366665588275e-12	0.611553182247286	0.435213598188989	0.390321675684709	0.346150915959227	0.433047225960553	0.0911504929346248	0.398119158066791	0.38012523195068	0.526633057068067	0.190562597832325	0.693004826640006	0.759124087591242	0.73542061198469	0.691916635491323	0.730508402981334	0.485663779948082	0.258552028326247	0.129811944803745	0.528882325001111	0.539329544530736	0.489576855238309	0.499875472602403	0.501712860910641	0.510830740288259	0
2010-03-04	0.196082275746159	0.0646510910752597	0.197724539623708	0.313868613138683	0.546207032356244	0.52990380397147	0.658351757504078	0.138874718823922	0.304466198275346	0.554665397019372	0.577822781160672	0.3321185250956	0.422794052258445	0.625284342314199	0.102255768514025	0.422586646836334	0.497613905283267	0.576798967222679	0.555555555555556	1.26314796030052e-12	0.625155162533372	0.425034760868974	0.402830325990538	0.356600823517673	0.445675023003944	0.0907538974163819	0.404957363595709	0.51716621332746	0.535916760688096	0.183651800628821	0.651024230510452	0.686131386861318	0.727654231818655	0.711920445697291	0.691291971859423	0.496140203480424	0.2554884833398	0.152748137890597	0.479295910809518	0.480768749135739	0.496924818438213	0.502124493438649	0.50496176175316	0.514156731748073	1
2010-03-05	0.184337714381499	0.0855031260593218	0.199007350304221	0.251824817518254	0.564849505194009	0.513158824080738	0.661169181305251	0.150039041687775	0.298057606103698	0.561246524691777	0.563636237335161	0.331948527155671	0.427405846982257	0.699904501006764	0.099065958307641	0.41228560222241	0.482578300972257	0.59455423034739	0.666666666666667	1.26262683458481e-12	0.610053646040896	0.41491930380871	0.408213011198582	0.366101903627544	0.458320394946986	0.0912306610449259	0.392114009195545	0.492027007431218	0.554298887937447	0.179626775967508	0.616869900793058	0.748175182481747	0.74487857164746	0.731457456571526	0.701362745522972	0.506723253832745	0.2554884833398	0.167867616960285	0.469314824591105	0.536350455960612	0.502845479433819	0.505306035109436	0.508647277342426	0.517741299484806	1
2010-03-08	0.19333354861826	0.114320911314603	0.200946031115722	0.0706713780918697	0.623814985636691	0.567971425010063	0.719959257391157	0.169201178287179	0.315080756521884	0.595056714172046	0.585010242082966	0.344833612217246	0.439350127707951	0.769483287662065	0.0980683364457422	0.46532088925183	0.49928452798449	0.617078390767385	0.666666666666667	1.26208599422547e-12	0.623904511502411	0.396861662798251	0.414163481770048	0.37496429489149	0.472961275983877	0.0944460207529594	0.413986844004996	0.602382245562031	0.604734993505878	0.170975396741955	0.631763588155837	0.929328621908131	0.821769875391879	0.772164674167122	0.802290903317865	0.523646811929328	0.258623548630784	0.215741476918736	0.499323736517797	0.596476910235626	0.510246305678327	0.509145826781074	0.516288742927431	0.523619510916539	0
2010-03-09	0.197081812883578	0.144456996446691	0.199212595810944	0.147540983606559	0.618829419453254	0.57345613853774	0.680447886923664	0.180472852964395	0.316814037012164	0.582928355602929	0.585149718002566	0.342442282124153	0.455219340113484	0.779705796628634	0.0978599132954967	0.498066909574357	0.507080767256864	0.611300153415055	0.666666666666667	1.26219452420289e-12	0.631390380969545	0.385641566190784	0.424347227956523	0.384213209012549	0.487551662985279	0.0962301804870371	0.42074684330301	0.555972596395749	0.580322223301205	0.167063705513935	0.622581373680451	0.852459016393441	0.845275716936598	0.807765434033776	0.805276722701181	0.535719009149335	0.257829433034171	0.246971171117566	0.472301944342423	0.506427122544118	0.513999581845184	0.513863285120516	0.521114891841978	0.528276609222195	0
2010-03-10	0.205827762835985	0.166971813331409	0.198284873134302	0.285245901639343	0.550368145946858	0.576777830142317	0.598045655076254	0.183222901456188	0.30402585279351	0.545106684840177	0.547923798299643	0.329036441258145	0.459759772443117	0.724574175960929	0.092797500665568	0.463795544924546	0.464758325492545	0.583487437139803	0.666666666666667	1.26275355123544e-12	0.592883906949545	0.387189679726335	0.432220305384589	0.393281468996843	0.498854357563958	0.0950157931838448	0.387122307983178	0.454448543765103	0.546276894901456	0.179628708744841	0.571825248094553	0.714754098360657	0.811225666320559	0.819240514272931	0.725078026191684	0.537883340171668	0.255656935347304	0.239429601393008	0.424638169064772	0.448906821856651	0.51452821229122	0.518937295543753	0.520578063795283	0.529954098624355	1
2010-03-11	0.213574175650973	0.187878429010077	0.199345163872738	0.200000000000001	0.57961341863133	0.480511159005134	0.618122049021203	0.19233337478102	0.298096683617936	0.559662445832092	0.563143509322679	0.331937749319366	0.469233130270366	0.764478454748447	0.0880725374088775	0.451627500770219	0.498727653750748	0.569212748079731	0.666666666666667	1.26239105099032e-12	0.6240862262048	0.384688200729664	0.441669623853665	0.40253937603445	0.508475646588403	0.0900765889035975	0.366179950084612	0.569662967954618	0.567299772734013	0.176875782521198	0.565288971602833	0.8	0.819305058833487	0.829799325001577	0.728123525800005	0.54282186577661	0.255458517640181	0.22887420470909	0.44491319275196	0.549259591909151	0.517488542789023	0.524285576800678	0.522544244551444	0.532646934183928	0
2010-03-12	0.220820819897253	0.188832522925202	0.198100896795615	0.44262295081967	0.471040857122927	0.443483181621586	0.505944623900335	0.192505870714052	0.279217222078082	0.504205468185564	0.532438895825395	0.327235198049129	0.479714481915392	0.703309989317334	0.0806403532280315	0.392948818727317	0.488147043309669	0.544776885504694	0.555555555555556	1.26493808781231e-12	0.616585348022051	0.398864027957934	0.44722837121791	0.411124181715913	0.512498038367662	0.0897512639842495	0.359134168813497	0.547205315872767	0.514999960191652	0.204725952602864	0.49422307196573	0.557377049180331	0.737088338085131	0.807238722390581	0.594973262628042	0.53449258979809	0.252485385032926	0.205709205686786	0.372914066948126	0.400127553235167	0.515638336227896	0.526397462220079	0.517240381994289	0.531092260468146	0
2010-03-15	0.229566769849661	0.169578824845265	0.197269739784896	0.616393442622946	0.405963115974127	0.412808056665452	0.425327948630968	0.187092401463796	0.268364925867177	0.465044795341579	0.492358464097083	0.320893972113744	0.484174631551573	0.69921913865401	0.0786827525218022	0.328427106678549	0.449722721181537	0.496730618179652	0.444444444444444	1.26717334402919e-12	0.580637544678527	0.421209112473396	0.449741287773102	0.418524776148248	0.509979953812541	0.0883537866135838	0.331203424199596	0.504001132886089	0.506577242773915	0.212395595983968	0.412007820426323	0.383606557377054	0.619534514318841	0.749876384323905	0.434807684728728	0.519098882643347	0.251490394667366	0.203366987026498	0.333378942082894	0.42914289844563	0.507920331715767	0.526232899719866	0.508966954223119	0.527128783769218	1
2010-03-16	0.221820357034672	0.151700390913894	0.198135001098962	0.563934426229504	0.427313801821766	0.457920524105452	0.441818315420064	0.17736458128133	0.275530449848366	0.472942495025059	0.559401603608376	0.330272257468297	0.484263834544297	0.704302694011993	0.0761797631686159	0.327173089622537	0.434130242636787	0.462598379096161	0.444444444444444	1.26301444243422e-12	0.565484626047555	0.435535506820158	0.455442789746345	0.425653996380299	0.504211408342019	0.08820014314455	0.310367526619959	0.453766745147107	0.542606401319646	0.194341670412546	0.393847563392981	0.436065573770496	0.560106483863545	0.690239440585503	0.390709756920081	0.508985574209765	0.252875025432018	0.146770978512001	0.371253841668828	0.535673385208445	0.501206725051107	0.524696983051211	0.504881530244774	0.52469845872385	1
2010-03-17	0.226068389868697	0.148837101484903	0.198982728331697	0.406015037593983	0.506092370915588	0.468383764117671	0.533903537084182	0.169883696800599	0.294699860259812	0.514111116841177	0.611469122586916	0.338976382562887	0.482408412295645	0.753787461140278	0.0784771703948305	0.37180392441296	0.453063966583983	0.457175791360582	0.444444444444444	1.2625974646318e-12	0.582391922267003	0.433818211973284	0.463487589181302	0.433062907110003	0.499756915639511	0.0873125495842588	0.292662925491514	0.454763197391292	0.566114573837429	0.208979179226287	0.443188451527647	0.593984962406017	0.577507173585672	0.656746105298493	0.464944844751128	0.510589339765601	0.255113129994587	0.165315422988661	0.448188774466604	0.608415302162756	0.500096601114431	0.524395285134154	0.507878692402285	0.525960089065384	0
2010-03-18	0.219071629906772	0.152583820315417	0.198023826335935	0.532751091703062	0.487257241771484	0.418214728993115	0.504555832066774	0.1675649667171	0.292814135651665	0.501430389567008	0.595207885870207	0.336561967861238	0.472720967285859	0.746888508286393	0.0783407618506911	0.355288714989718	0.408514027884697	0.436632476091366	0.444444444444444	1.26326296674022e-12	0.541559323233622	0.436013068751614	0.46354977235249	0.439003218812547	0.495451257834813	0.0867398569979931	0.28585580872545	0.410232326767103	0.536514450720993	0.204806590909621	0.471030664880491	0.467248908296939	0.543347509376494	0.622118992154806	0.440015077592671	0.509253864037476	0.253211710525015	0.158766202885554	0.439748873091108	0.489700863431149	0.49687195539361	0.524258149717309	0.508625380288494	0.526281377486422	0
2010-03-19	0.21557324992581	0.147443069234738	0.197247504999323	0.594202898550719	0.485849952529276	0.450071386001882	0.497241590172548	0.16281034731412	0.297914407749383	0.497404818458416	0.540885094971654	0.331689465809078	0.467243903532628	0.684092019958344	0.0786165261860286	0.325053491839578	0.397376543209877	0.444843342498432	0.333333333333333	1.26405656072832e-12	0.531521501361283	0.438433100769651	0.465625394905825	0.44419550971866	0.491239645367633	0.0873418360290979	0.269311670880787	0.336705060031557	0.520793530311408	0.201953504749119	0.405939347852052	0.405797101449282	0.498386220520887	0.582847207025301	0.399614670095582	0.50765023608889	0.253970056671755	0.165798062943026	0.449542994132983	0.509290733107866	0.497506311928853	0.523627326799825	0.509033785054149	0.526493467360502	1
2010-03-22	0.190085052921652	0.147645640328788	0.198105768707083	0.54106280193236	0.500499367627739	0.436126445899899	0.509393018463749	0.160960442142679	0.299641488980591	0.502667881859062	0.582742332566229	0.333714008530637	0.462739152400085	0.638085416414306	0.0805175753406705	0.332253513470977	0.414639644455849	0.483414271090741	0.333333333333333	1.28317759572034e-12	0.547104933391205	0.43855274374348	0.469232297531591	0.449114022417868	0.487684922425041	0.0874521004992902	0.2621004073748	0.286731303940372	0.493114656644589	0.181038772823096	0.459256416027469	0.45893719806764	0.487599128487845	0.552782428914872	0.414764722183916	0.507710156219884	0.253732417443213	0.131817074275978	0.456980423295848	0.527403146719332	0.501523903318729	0.521707430964006	0.510289313641259	0.527225602613752	0
2010-03-23	0.190085052921652	0.140916721008171	0.197405337972813	0.695652173913049	0.45211833133225	0.446639970680453	0.449960477747834	0.155217704025589	0.294972090058546	0.477558823921034	0.545875588108895	0.331798200370067	0.453194432178657	0.662754170698794	0.0834364746170034	0.336866395265146	0.387352807002537	0.510034007034307	0.333333333333333	1.25790643015491e-12	0.522351600492616	0.445666970570337	0.473216304823711	0.453893460478209	0.482998965871476	0.0873489452121226	0.246115523397662	0.392739141449866	0.46840347877645	0.183818446998777	0.402035846871374	0.304347826086952	0.424590714054091	0.510054842284442	0.343336054845454	0.502425465347361	0.252661175275437	0.124763819313921	0.416021030920347	0.462274554984802	0.50300406856763	0.51899214971049	0.508265943627796	0.526199583313447	0
2010-03-24	0.185837020087626	0.134668438781882	0.196477949007404	0.710144927536231	0.44760283302439	0.441278891779071	0.429914284070913	0.135036780849105	0.283620550849675	0.471090599141883	0.564697769441482	0.330715954557762	0.434381521013244	0.577944332467789	0.0851260555441396	0.322081014728474	0.353383478744333	0.506959031106368	0.333333333333333	1.2559795012181e-12	0.492189932239953	0.451984580200074	0.47433016171802	0.457953153719816	0.477611664156265	0.0869188997368495	0.250480929004772	0.392676741784618	0.476545783855757	0.182256079391638	0.405270670453473	0.289855072463769	0.377352258830491	0.464562912018643	0.305981526832757	0.497498079200168	0.250801203000847	0.115058267223955	0.408617315254438	0.506216226557068	0.500942409828088	0.51734652470836	0.50664886881003	0.525207765565619	0
2010-03-25	0.187836094362461	0.115357554882462	0.195747958719413	0.951690821256041	0.376020665925574	0.381487362786362	0.299465775773472	0.111025993267229	0.270766486619503	0.434022305273637	0.526023687110796	0.329468786197083	0.41514935578203	0.506299752469165	0.0871589348585406	0.333485429410852	0.327210389758503	0.504553242269119	0.222222222222222	1.25967270041689e-12	0.467779902883666	0.467256366296809	0.471103705668587	0.460516884765753	0.469563258077289	0.0858692013659444	0.240727307665292	0.395010208738074	0.443684794828015	0.190940043404423	0.318830699443082	0.0483091787439593	0.258645861996439	0.391498070780077	0.162466235623967	0.4856062239748	0.248982101312381	0.117750299440622	0.37174258875626	0.433378578947147	0.496977681482817	0.513616441370196	0.501101461007243	0.521857154797141	1
2010-03-26	0.186086904371979	0.105561435079164	0.196730194963217	0.695238095238097	0.454892337594701	0.372344510700497	0.401277020332813	0.0974934996116714	0.275180427042537	0.467457452441452	0.578744297971575	0.334150512920879	0.405470831071516	0.466415852719619	0.0900568117791965	0.390253547901756	0.378999693496422	0.498477581700629	0.333333333333333	1.25981320784681e-12	0.514846925800151	0.468160776758263	0.471834604594806	0.462722823542246	0.462777374058211	0.0838726060649198	0.253083264061866	0.376804084103154	0.441467721842202	0.188095016562768	0.385170049234848	0.304761904761903	0.272104712934138	0.347633656029162	0.241497051884191	0.484078094099208	0.250025028741745	0.146604050490429	0.429173495758404	0.589757839498259	0.495761831456933	0.513314743453139	0.50196193422148	0.521705651977228	1
2010-03-29	0.193583432902614	0.114222342152386	0.198682543166152	0.27225130890052	0.549956006905392	0.369183114012569	0.585732675265129	0.0893060048000942	0.293933773388637	0.515943205029045	0.616261980574597	0.350346978634413	0.396550531799154	0.474049641540465	0.0913094534199837	0.422515732824083	0.406286530949734	0.492446807255846	0.444444444444444	1.25355520152062e-12	0.539662597228281	0.453484026124604	0.474745689467872	0.465104737968426	0.460720812177818	0.0837754544516042	0.332835788119649	0.502018652196301	0.47977275322706	0.21839701382418	0.578141316108195	0.727748691099481	0.433803573776401	0.376605823806814	0.521900751240944	0.494410696516538	0.252352020356475	0.180794715764383	0.498294348072125	0.623522044843851	0.497929216285682	0.516523712207294	0.509239619917387	0.525390380404954	1
2010-03-30	0.186336788656334	0.122264613006093	0.199794811714732	0.177777777777778	0.560247069639557	0.462337152597968	0.602798152799792	0.0922202502238591	0.310083758471063	0.520292139539156	0.57802942525134	0.346797923400537	0.398593280332525	0.556619344983636	0.0914965612578975	0.391523270218024	0.45250709235024	0.50180418031545	0.444444444444444	1.26744886093522e-12	0.581079256365486	0.441223087137754	0.479832893355111	0.468088780171138	0.461989845849263	0.0768493109449347	0.337693701826567	0.511814451052736	0.503770672655955	0.211154991396155	0.630243376953923	0.822222222222223	0.575714027059069	0.447011455650147	0.713858218173773	0.503613610705209	0.253586696186772	0.18425144563472	0.498721142932745	0.524069502934046	0.50226398594318	0.519540691377867	0.514895894807694	0.528862200443104	0
2010-03-31	0.186586672940688	0.121117390280519	0.198451749277799	0.39053254437869	0.491166397716908	0.377813655913182	0.481637368695212	0.0926797457197413	0.303976875116394	0.489292910262398	0.554894654602344	0.328481930864741	0.402098957946563	0.460498172633013	0.0914515178643786	0.375037128798254	0.456962086220169	0.515320072435356	0.333333333333333	1.2572757144087e-12	0.586017827393954	0.441786424566306	0.485074239461817	0.471587203455763	0.462905891137131	0.0771933380497242	0.357274321146351	0.520432923007107	0.470032595438678	0.21667180510845	0.572026684467246	0.609467455621311	0.59350240964227	0.500352748623079	0.684346259713158	0.503522679295914	0.251424795713593	0.170814285619985	0.445572453185818	0.443921881945169	0.504378507727324	0.519568118461236	0.514644322602717	0.529417569306087	1
2010-04-01	0.180339565831826	0.119717440932037	0.199793094895275	0.272189349112421	0.516723706433802	0.444948593076207	0.532426736356678	0.093217558427458	0.307129407527257	0.50217117602959	0.563587086251537	0.329970884555557	0.402054356450202	0.560714467690064	0.0910050018849971	0.386322953325197	0.459189583155133	0.546516380451523	0.444444444444444	1.26444007185959e-12	0.587697257763815	0.438677525853589	0.490130591336939	0.47545791197652	0.464411992036731	0.0760513703432025	0.372740435887404	0.495153197043294	0.514694396812053	0.193794074453222	0.571857946533522	0.72781065088758	0.648091076509473	0.555566719361996	0.724331602311695	0.506186785943686	0.252317549371667	0.172374999233336	0.455802635702323	0.54069918590701	0.510193442633723	0.520528066379146	0.51626435096911	0.530887611420267	1
2010-04-02	0.169594541604583	0.118417487965588	0.200654186005738	0.254437869822487	0.520653535296369	0.465323318551494	0.538451054658982	0.0938077502587842	0.315341167328809	0.503695813208221	0.566580056287089	0.335550850643708	0.3956317409741	0.624637093020161	0.0929978871216654	0.38194806527397	0.425220254896928	0.560579141260734	0.555555555555556	1.26265227326145e-12	0.556569650142279	0.436338431947055	0.492561584126649	0.479069860464569	0.466211404090203	0.0745117441350208	0.354466638895239	0.488923488414826	0.542070204234592	0.175830096318762	0.563100535202333	0.745562130177514	0.690892982859366	0.607785651498388	0.744940259263928	0.508355356554875	0.253526102725724	0.155267081587103	0.439414090098694	0.515263984348975	0.513470951399148	0.521597722630531	0.517612531355494	0.532242720561265	0
2010-04-06	0.174842111576027	0.126611022879306	0.199614594110884	0.289940828402355	0.510421260422496	0.37283820915258	0.526007222287585	0.0916362643768825	0.307692617165515	0.501208993481271	0.581395753102567	0.332623281368322	0.392812926404033	0.694059413349909	0.0936678473950695	0.396280926368475	0.429675248766859	0.550563408115835	0.444444444444444	1.26294854112836e-12	0.560638070484093	0.436404791619164	0.492841901327529	0.482018847793068	0.467664861658117	0.0712293238779028	0.351858475057116	0.512147974063556	0.53117134488493	0.176238050334105	0.584060608611244	0.710059171597646	0.706608663549112	0.648256260184668	0.72687656324031	0.508733852664561	0.251739538258292	0.167963738002021	0.423785145596727	0.501875866433892	0.512466553551679	0.522201118464645	0.517974995328838	0.533046751399652	0
2010-04-07	0.175091995860381	0.114044580070453	0.198214948631219	0.597633136094676	0.42730020197588	0.346704910626446	0.393431609510906	0.0826596485268811	0.292450998853525	0.46831743045801	0.52975461369416	0.325950383635791	0.388468740658392	0.605252574960397	0.0927444577209306	0.369698966328137	0.401274662846063	0.52339623098346	0.444444444444444	1.25714531615852e-12	0.534938332645781	0.447468789719599	0.486664161640993	0.483068328380352	0.466188096962239	0.0700107141683598	0.37378016891908	0.561970449569665	0.474369951238083	0.169707749428442	0.422910717840163	0.402366863905324	0.605988446631758	0.63901119684955	0.541819389643987	0.500665454099633	0.249663362574609	0.186878362187306	0.382686198703536	0.432382656001059	0.508237509983389	0.522255972631383	0.513568505736486	0.531063906351812	0
2010-04-08	0.175341880144736	0.0999434967031027	0.196244033784972	0.763313609467447	0.38744930709815	0.391032591885074	0.326868065295281	0.0825232084493976	0.287120039063392	0.45159718984753	0.549193468549091	0.321616460350986	0.384633011971276	0.499509234237925	0.0935685128169286	0.382007580719105	0.379556567730163	0.505914918932227	0.444444444444444	1.25833630597183e-12	0.515013315567013	0.461786186863291	0.478397944401159	0.48215543671137	0.46157603327219	0.0738192308191303	0.425031349576349	0.596304565808008	0.467386763490088	0.172625239415889	0.325580116705883	0.236686390532553	0.479086658817096	0.587160414354626	0.356794708563949	0.489727169911862	0.249558499848015	0.189766696417821	0.371977790012469	0.467776283617101	0.504907138173361	0.5216251497139	0.508128005570657	0.528019669414055	1
2010-04-09	0.168844888751519	0.0868496335762768	0.197212858327311	0.710059171597629	0.402879144646125	0.409878915470037	0.363052306890771	0.0778408120861434	0.291739044754923	0.461340449448477	0.56716587094126	0.328832660318463	0.386087020752671	0.557383266303448	0.0962050629295171	0.358836076109496	0.402388411313547	0.47427877152718	0.555555555555556	1.25740050503385e-12	0.535872154031566	0.470780734786981	0.47234944025261	0.480142812630135	0.455703648176753	0.0734853033405985	0.404513661823213	0.518098683761586	0.472351807250274	0.17339502033449	0.358306250416342	0.289940828402371	0.413713852255934	0.529057592149978	0.299259737877201	0.482348039062703	0.250434788803876	0.164193945338219	0.390365892574172	0.524695937143758	0.500995272872693	0.522612524715178	0.505305489886473	0.52598597233499	0
2010-04-12	0.177091070135216	0.0898669764503896	0.195038062225596	0.921875000000003	0.325736800937225	0.400339535286479	0.225477367022674	0.0874267526778948	0.273077483910039	0.424154372346172	0.552168243315253	0.322742990609146	0.383259285883332	0.459607044468953	0.0951826688090184	0.289882155392444	0.372317202691529	0.439756861210627	0.444444444444444	1.25984296352696e-12	0.507660964802473	0.48928393618947	0.462729760247932	0.476493296884542	0.446632169780783	0.07688250606838	0.457517879404547	0.629112904820426	0.438755385908955	0.186950120699415	0.300913572063679	0.078124999999997	0.293652413928161	0.447097645174667	0.163807467804888	0.46761810617926	0.24669254999627	0.159093205120939	0.35317299922443	0.421792473670713	0.493911624895807	0.520637774712621	0.498328744730009	0.52142743754812	1
2010-04-13	0.177340954419571	0.0926687948334932	0.197012492380338	0.760416666666658	0.380037129373861	0.443414128194561	0.31735477404083	0.0900654983180989	0.276518422308084	0.445906074284085	0.564932489055723	0.327390336636504	0.389075321008913	0.537445411957847	0.0934285225944207	0.301689148186693	0.417424015624556	0.425444533698521	0.444444444444444	1.25749346527709e-12	0.549811318301591	0.496339496151706	0.452377298520629	0.471378914706207	0.437651211557883	0.0810564012837219	0.483861395279582	0.645815441174382	0.470038165118131	0.190447723102923	0.344445747188751	0.239583333333342	0.271908625567729	0.38462944323712	0.196591379604755	0.460921903870421	0.24803193442279	0.126632578178975	0.403330363510884	0.559516155033883	0.488783909569255	0.517456233041835	0.496448583205418	0.519271983850511	0
2010-04-14	0.176341417282152	0.0958122115750927	0.195553813814422	0.848958333333328	0.357102164511968	0.419627227172535	0.282551346043959	0.0949556968157993	0.279805834674601	0.435046699925546	0.562244825087686	0.336170605241378	0.391019946250288	0.52234887987763	0.0942876850068213	0.31525681644113	0.379556567730163	0.428157118062642	0.333333333333333	1.25839694815801e-12	0.514531471223489	0.504738717417221	0.442057528169548	0.465099570104054	0.42846715225637	0.0832228664378695	0.476389139048458	0.554368129393364	0.462983847338565	0.191462009248965	0.345180052123732	0.151041666666672	0.225443350566557	0.326255464482886	0.176247522872839	0.453145485770605	0.247843455076117	0.131133566249069	0.405211460103082	0.484180684724559	0.485506400803831	0.513561587203459	0.49367556049477	0.516645128828309	1
2010-04-15	0.173842574438608	0.100160432367307	0.197123107148489	0.760416666666658	0.387632358147215	0.453330936623607	0.343625352782857	0.102363561946646	0.308233034269477	0.449716482527667	0.563908841602933	0.333113333255683	0.385168229927619	0.581592631605276	0.0976138644358427	0.314147393828072	0.347257862173182	0.436181148176148	0.444444444444444	1.27297300263308e-12	0.485761458131836	0.50681255662482	0.435749833319917	0.458738834053513	0.420578027564027	0.0858571811802764	0.475203613543621	0.603339957720643	0.496193610064689	0.180921035304862	0.355366727013972	0.239583333333342	0.226435916659992	0.287696824053793	0.22458697053852	0.449929381032495	0.25210167013071	0.125155062863877	0.431283995664147	0.537425976505047	0.484607729045569	0.511367420533951	0.493346460381925	0.515359185807029	0
2010-04-16	0.161348360220885	0.104198065960078	0.195863918801294	0.963541666666662	0.333777205967101	0.441109118067514	0.274553453040345	0.110946649496305	0.30464193195273	0.425758177113019	0.563787598923233	0.330960823516306	0.373589681472092	0.521775455974467	0.0979245088908191	0.292060079522756	0.320527898953612	0.437355794897533	0.333333333333333	1.25948327774886e-12	0.460809604752879	0.516037590207732	0.426381819396261	0.451664183101124	0.41214670083615	0.0869534754228456	0.457699752808982	0.522310927096143	0.450916952107804	0.172360531854927	0.344151787859497	0.0364583333333377	0.153756025761044	0.235824720417453	0.145306591300362	0.441534476874791	0.249368264126776	0.114218999852915	0.399463736014466	0.449399516971552	0.481171631146333	0.507555055945681	0.489640961125759	0.512326534262002	0
2010-04-19	0.185087367234561	0.146807161082533	0.192229339967941	0.976744186046514	0.158685273369465	0.315904576816781	0.0524554775513853	0.172432102050305	0.251032294655885	0.298595215214064	0.487558724141514	0.266489354469675	0.356569750460423	0.387099638269074	0.0920470181481238	0.192915416514641	0.238110512359934	0.42384167798192	0.222222222222222	1.26081015289567e-12	0.375458387410429	0.564417559013655	0.41124338134292	0.44279504372637	0.394713975655017	0.0973884859469856	0.553023761558873	0.580786526375341	0.315336433547377	0.285985348130485	0.180322688460359	0.0232558139534857	0.100535779724985	0.182082870533254	0.106217659985417	0.404530423143109	0.240622464110289	0.237811764697514	0.234474547499127	0.188503011689336	0.470546159181005	0.498366983017117	0.469918906700608	0.500044257118797	0
2010-04-20	0.194832854324386	0.191938236951164	0.190316679094195	0.938073394495413	0.139436190714128	0.301565809983438	0.141151494219256	0.239834348719203	0.223651991301937	0.286981866162151	0.51555600123032	0.265587637746289	0.331334223818909	0.320212065675829	0.0882562440455908	0.200029135623502	0.209709926439141	0.390699912660625	0.222222222222222	1.26084580713237e-12	0.347123866758754	0.60731077141225	0.398469462834348	0.432991602650986	0.37153178402047	0.101237910128058	0.544992410044387	0.568346455235129	0.293549862682383	0.281762795179435	0.179622064048843	0.0619266055045873	0.0790183371216311	0.138508222724413	0.116705045037611	0.370662268948996	0.238809115347189	0.246427300829765	0.239217645669766	0.45590635600449	0.456643178450251	0.488493233004331	0.453999868504122	0.488420864691798	1
2010-04-21	0.194083201471322	0.233845664543463	0.19195881114644	0.855504587155965	0.20018194368005	0.372842438453339	0.239374399258896	0.285992375894768	0.243391572067193	0.321422875414833	0.564100858298753	0.332931276110384	0.305162065753797	0.389362123012054	0.0857713165053717	0.232950514966951	0.228086776152596	0.359987172514808	0.333333333333333	1.26072232321753e-12	0.366907615554153	0.629553252412767	0.387769084632636	0.42288032031333	0.348204825364193	0.104675900993077	0.525865397850034	0.514889556380481	0.335525996080108	0.296574599185275	0.261046320163746	0.144495412844035	0.0944861929849828	0.115027222446574	0.175122054245048	0.350617453414912	0.242787561793377	0.214326001435022	0.3195680674795	0.574468093254315	0.44554193908349	0.481033066328005	0.44660511407861	0.480738985277018	0
2010-04-22	0.201329845717601	0.27599736315822	0.189971092717674	0.938461538461537	0.163276373579578	0.387661336523373	0.234769848934031	0.331911796182168	0.251466983873316	0.292550251355799	0.555314888505183	0.328677372543349	0.277170166637122	0.31629842389637	0.080919908502081	0.199066324566865	0.201356812933025	0.30376643383911	0.333333333333333	1.2608129871294e-12	0.337820311189866	0.65688560848892	0.371455318420629	0.411332700845776	0.323860964559059	0.108546982979847	0.52372997796495	0.545026478742927	0.295445162971714	0.29427957854545	0.294673115189301	0.0615384615384628	0.0748451335712074	0.0923020131823671	0.164176207838517	0.32691335055629	0.241771377245267	0.223822497578209	0.305353724701808	0.41483028406446	0.430687423549871	0.472859795484088	0.436848371236717	0.471711557808505	1
2010-04-23	0.223319662740796	0.293794167471706	0.192415227322111	0.813186813186814	0.252639782888839	0.43974415345367	0.307084242632395	0.3600254074204	0.272532432873612	0.34104718749952	0.58602547751779	0.335778285835904	0.262192984158826	0.353542229713792	0.0794573513671196	0.258475786308988	0.262056104410801	0.275654970702861	0.333333333333333	1.26066446897159e-12	0.397850135855051	0.660643636888295	0.360269263029248	0.39972310999257	0.303466841300135	0.114805031459526	0.538265069835646	0.646897970521091	0.327085072206323	0.320288220332722	0.35436557040461	0.186813186813186	0.106983581322732	0.0887224146878879	0.23114579192956	0.319154261036559	0.243868696013595	0.310179077486176	0.414946121748216	0.612025670770474	0.420907760298201	0.466003024641876	0.435438944042464	0.467220081601903	0
2010-04-26	0.224569084162568	0.310319771477086	0.190998471361635	0.847087378640779	0.235465379911402	0.416654634384844	0.308845591024737	0.383453340551682	0.278578225587045	0.334403665200063	0.568731650195132	0.342522311042346	0.248339759388846	0.301797750640698	0.0768607642762612	0.230744831997433	0.265397349813246	0.31285264846055	0.333333333333333	1.26067994237863e-12	0.399298068916978	0.665721875185576	0.348798195686848	0.388003518184126	0.286052567511277	0.116391388819417	0.507073204219191	0.531895801334978	0.317579914526444	0.319211828649323	0.371069346824878	0.152912621359222	0.116168859845154	0.0896429159718637	0.247946907356957	0.310877511006098	0.242863260840112	0.260394826624435	0.429788721508639	0.472109314104524	0.42016767767375	0.460106201717574	0.43253280842628	0.462428023083953	0
2010-04-27	0.222320125603378	0.328074849824526	0.189464841964997	0.846590909090908	0.228306263933107	0.383667259795546	0.319241579849882	0.397081304144642	0.281605477399281	0.34012041868453	0.557400030706101	0.3289650205694	0.232827358954207	0.303186183287269	0.0735598589782404	0.234086563839385	0.255373613605908	0.367386924892013	0.222222222222222	1.26063458015397e-12	0.389321237723859	0.668524237507835	0.337118586949202	0.37615171387491	0.271532468457469	0.114862717887792	0.485896846746398	0.497706750656871	0.3373805604737	0.317376410627161	0.377368637574264	0.153409090909092	0.12247163730661	0.0925257206255285	0.256766318005052	0.304466348629679	0.242484947896598	0.254192521539502	0.423518970353907	0.494839644153169	0.420590582030579	0.453112295458517	0.429790900255788	0.458050205699258	1
2010-04-28	0.22356954702515	0.344561708290005	0.190937087088105	0.759420289855078	0.27561876138675	0.410715438256641	0.354244199744534	0.398987471561113	0.305434723670306	0.373748878732042	0.566208790368471	0.335505009143016	0.226324460784654	0.374017941542804	0.0690920377001607	0.241821047354636	0.303264797707638	0.409727153565018	0.333333333333333	1.26046356169301e-12	0.436160682926525	0.660013728919817	0.3296647497849	0.365090022607524	0.261603960325609	0.116176930952196	0.465597511063642	0.437654676390221	0.367717561056042	0.32628027357736	0.395140030512687	0.240579710144923	0.158147865955098	0.107291809568787	0.308555157023877	0.306172246285396	0.245928808753108	0.258072125049739	0.451151496942189	0.561962450732362	0.420643445075183	0.447380035034428	0.43055518907154	0.455941046753527	1
2010-04-29	0.230066538418367	0.341985199779725	0.192555720278429	0.75072463768116	0.280575024514441	0.39375911811948	0.365999445833896	0.394287251543649	0.294145591845684	0.38661399816483	0.585783712816171	0.337157061919858	0.214701310832766	0.386983170938839	0.0639258429123197	0.263129216063076	0.287672319162888	0.477895313740422	0.333333333333333	1.2604938054907e-12	0.421635885409489	0.649679648175275	0.323111564067405	0.354851364029789	0.255805716578659	0.117182992762607	0.455117986098547	0.56382603844145	0.364928027414296	0.325421599658845	0.427636878635507	0.24927536231884	0.185071725748084	0.126829044664978	0.337537210263684	0.309839065958906	0.242239447447485	0.253795692078432	0.453964315998792	0.516049787616871	0.423709501662193	0.441263795443175	0.431332876424165	0.45436771866369	1
2010-04-30	0.220820819897251	0.339592727591607	0.193981397871563	0.621212121212129	0.344216482858199	0.422439791403092	0.405090745947326	0.382077870857391	0.310192580475106	0.426384632031407	0.565057028520495	0.338299803537404	0.207324223334522	0.464585866371601	0.0704905748380624	0.396911397483188	0.318857276252387	0.522664153537214	0.444444444444444	1.25998986560863e-12	0.453068384019695	0.629203734707785	0.321917113358075	0.346407208114171	0.255437972194678	0.117490874419356	0.437786248154718	0.417187581812431	0.415092989946202	0.330485124430127	0.445023868533702	0.378787878787872	0.249783576754439	0.163151543544898	0.419995473938317	0.321286215721935	0.245592164306628	0.260727953947133	0.481116188691471	0.578244407941592	0.425824023446338	0.437286868354692	0.435337433840183	0.455060966572349	0
2010-05-04	0.226568158437405	0.34528317997976	0.192720982590539	0.780254777070064	0.286171051151603	0.404394285743686	0.36951713712774	0.368464906648458	0.314032483000001	0.396058601069652	0.547260509130053	0.331620325681022	0.19180290260061	0.388436422811566	0.0771548909465902	0.381568657045865	0.27820545718929	0.526618931385255	0.444444444444444	1.26045086413733e-12	0.411663491983921	0.625173925501391	0.314978061601679	0.338180772439849	0.256233851998438	0.118948738844484	0.416016770914256	0.413025951935198	0.368475806092481	0.331177613805999	0.412117755281156	0.219745222929936	0.235499860074238	0.182224093761045	0.369192670455478	0.322241580439056	0.245140454737052	0.146247061805624	0.417195278016059	0.413519240595112	0.42614120171396	0.437067451687741	0.433001457909006	0.452784351064021	0
2010-05-05	0.237563066949003	0.35828778355232	0.189862009012438	0.80906148867314	0.276400790066454	0.450108596916211	0.369981692072907	0.3461015275915	0.326906158104763	0.400959022229894	0.555900033513552	0.324165934133238	0.182909364226065	0.368069039734623	0.081490804451648	0.352680046163092	0.294354809967781	0.526012128188127	0.444444444444444	1.26043436581148e-12	0.426272938097682	0.622021962185599	0.303936325496347	0.329258724974778	0.257784581070817	0.125590990997681	0.468944340519349	0.588854238271434	0.371331536610012	0.331280129850931	0.392464644461782	0.19093851132686	0.215576248174932	0.187766193112038	0.323677037053634	0.322877294411772	0.247124985485863	0.154667914197559	0.405987482597236	0.493119200622562	0.426405516936978	0.437424003771537	0.4305502690367	0.450413840944066	0
2010-05-06	0.266799528218476	0.385424896654682	0.1868475460438	0.977329974811078	0.159680605144859	0.400011466888396	0.254190693009118	0.349874467573731	0.287930461686666	0.299908456052362	0.517664616870753	0.290379812151369	0.19104467716246	0.281614508679987	0.0797238004998562	0.290756452634073	0.318300402018648	0.491074828674877	0.333333333333333	1.26069986969747e-12	0.441224400279519	0.655154182372261	0.285071050739829	0.31812156183859	0.252649755477397	0.131486414174638	0.510617843240918	0.585698170937693	0.277169113532751	0.390701695713306	0.216196481557558	0.0226700251889215	0.141537752725216	0.164805455440119	0.206953743981682	0.298454950302797	0.240012267758268	0.218630872990618	0.252618575690792	0.233246199871823	0.417207347175947	0.432679118348726	0.415508069348999	0.440856962103338	0
2010-05-07	0.271297445336856	0.414669455046408	0.185034024219025	0.914600550964189	0.151039274316403	0.402391634869417	0.268770132607402	0.368643993865918	0.274867533009011	0.303787938199025	0.532737970779525	0.290663182276506	0.202382377537633	0.278661314215818	0.0787000135050342	0.249024868715818	0.327767263992245	0.439406023896233	0.333333333333333	1.26068014852167e-12	0.450492259560374	0.681249584185648	0.269347894310345	0.305878449727152	0.243530078399384	0.130911799103267	0.49478738558242	0.540557646368299	0.288034286364277	0.390845952607748	0.140768392088492	0.0853994490358112	0.11482823964367	0.139882290675072	0.184871420803492	0.278164106300952	0.240176298403324	0.204113008889713	0.270957238059681	0.483641006088137	0.407110505656655	0.429031316260669	0.404228516005067	0.432326743011617	1
2010-05-10	0.233065149830621	0.436695141465432	0.186732544414688	0.82089552238806	0.180106441571333	0.39434523932861	0.299962427670312	0.369255503742089	0.272090138645664	0.332315278480487	0.572772207390253	0.333255449656188	0.208198412663214	0.374240359105976	0.0786464673252981	0.272109608284903	0.317186653551166	0.384320666103186	0.333333333333333	1.26020000511003e-12	0.440229656950631	0.693168382824613	0.254670571773737	0.29297230003915	0.233947460833831	0.13357579345316	0.476892145440661	0.364138615800803	0.397371138276603	0.300575895803327	0.266905015748566	0.179104477611941	0.130855629903701	0.129037056993268	0.229172599830538	0.267021555122329	0.240082239893029	0.151741540230667	0.326196005141471	0.543756611378807	0.395850677156083	0.424286430837858	0.398228395470033	0.42621077484255	0
2010-05-11	0.248058206891889	0.46522332685352	0.184263483269085	0.996845425867507	0.120710234326895	0.366117264035999	0.23993811279123	0.382055402126905	0.234704268547741	0.271264927852308	0.545691070048413	0.314516527436669	0.215352492679649	0.36929079482331	0.074739869821269	0.216708437026093	0.29379793573404	0.324310913470512	0.333333333333333	1.26042698393774e-12	0.40859158845742	0.724917080258633	0.235722164653102	0.278630230680419	0.22026915753923	0.134650104929069	0.491238622019135	0.523400565500294	0.355324004461126	0.334699843065154	0.271960033376496	0.00315457413249347	0.078010967931623	0.102781672186915	0.157736799638562	0.242476298554021	0.233476242750777	0.20817498428207	0.265392642730466	0.320151380081285	0.382476326871366	0.417511941245753	0.385647147898733	0.416331683727151	1
2010-05-12	0.262551495384449	0.494590655741142	0.186553751632969	0.726224783861673	0.220014705504584	0.395404877414438	0.312070016888955	0.382628884992113	0.250896443425219	0.338905893041001	0.536274397228858	0.324938040201139	0.220053490396184	0.294770168474786	0.0695403150292693	0.240817782237977	0.297696055370228	0.279460120229714	0.444444444444444	1.26024741098832e-12	0.417653591054141	0.727130633793319	0.222049586478831	0.264257925628438	0.208838300319772	0.135803176351105	0.494081370978024	0.535521564163763	0.376755837536626	0.355902184849522	0.3112042156057	0.273775216138327	0.140493199773562	0.107773046348652	0.273553980322952	0.237099017633441	0.237619277501699	0.235998939545253	0.388369302160008	0.639144281817619	0.373013841887317	0.412739628739573	0.38298042766094	0.411498869102296	1
2010-05-13	0.265050338227995	0.499470673840785	0.189048352984452	0.561959654178679	0.298079494820401	0.4316864730454	0.370435922633048	0.358514745008824	0.282021243731182	0.399443335643029	0.601433151658002	0.358514846877539	0.230543762340483	0.384380777446706	0.0663977279353273	0.274528782934199	0.341689119835771	0.325018175263808	0.444444444444444	1.25884936269715e-12	0.467398314855074	0.708488677474834	0.21537432007714	0.25134489435553	0.20317158392136	0.139585153720852	0.502085742167241	0.518980274527216	0.443224914395856	0.369124228082646	0.3941289049203	0.438040345821322	0.24145863122954	0.14745038300017	0.422659877894807	0.246006244282556	0.240856626075	0.251392350647697	0.491197745949787	0.620973519560952	0.374494007136218	0.408735274567722	0.386297682202754	0.410439348858688	0
2010-05-14	0.24805820689189	0.504002119219025	0.187880767007933	0.657060518731986	0.272112660919336	0.376697276034422	0.344543870123315	0.321964277075274	0.290106548258885	0.38779240757647	0.564849830696819	0.342125194503627	0.237233986794756	0.302772664920357	0.0609728619752188	0.232681331896867	0.328324138225986	0.369518360960269	0.333333333333333	1.26015950465905e-12	0.451572033308294	0.699752444541656	0.208939802908644	0.239650322052492	0.200398230771859	0.138118588686591	0.459167567372851	0.367584282372414	0.389976759100919	0.354542307634564	0.394733781936689	0.342939481268014	0.274431197155901	0.185772782488959	0.440827941620133	0.249235022812919	0.239628141091664	0.24035253573761	0.44822096482055	0.447478504161334	0.374969774537651	0.403743545394591	0.385559409000607	0.407896647136004	0
2010-05-17	0.257054041128652	0.518957016872249	0.186445141505818	0.922190201729106	0.208229922507804	0.375957415271542	0.252686849808082	0.294651199662816	0.278315441957845	0.327854460913575	0.517572426054878	0.31784099880386	0.233317975414189	0.305235690225558	0.0550345102143949	0.20603820626602	0.260942355943319	0.393210257777909	0.222222222222222	1.26039468531425e-12	0.373198311208345	0.715360146197331	0.197491046085644	0.227867475017084	0.195387206324128	0.1387627306404	0.433768398205784	0.485451551455063	0.345000423673759	0.38184834444397	0.3379680432308	0.0778097982708939	0.200683501791409	0.184770272605179	0.298245545512022	0.236548465325083	0.236763793512053	0.250472761450006	0.342980955208514	0.327424172547107	0.369683470077288	0.395158868300142	0.376843608285174	0.401144267540175	1
2010-05-18	0.26080230539397	0.529695016093042	0.188035900181949	0.766570605187319	0.278878821933924	0.489380885938711	0.331682964121843	0.30079616938484	0.29298298163811	0.38206373387389	0.567375962965006	0.328858303384073	0.23290764164766	0.368401856173337	0.0509468184091056	0.245455413337467	0.289342941864112	0.461415164411206	0.333333333333333	1.25998368080883e-12	0.407832313085039	0.707632269728537	0.19297763097344	0.217484332590848	0.192930966850823	0.131301091906178	0.41916939348712	0.489110383720528	0.38574699796383	0.403264959813308	0.367959154831793	0.233429394812682	0.207707370711802	0.186630678440874	0.309701324778494	0.239264236912822	0.239588144148506	0.261900674327494	0.426104524546994	0.619694210124527	0.37232662230747	0.389591170376266	0.375859981033103	0.398361846727281	0
2010-05-19	0.265300222512351	0.537472939809218	0.186909069832536	0.827089337175798	0.263582860599098	0.505828622345771	0.324673141784685	0.313767162459281	0.29902353903723	0.372064722388315	0.573297882084723	0.338457425172611	0.223612689805858	0.31114842393245	0.0529128380346589	0.32307446723928	0.255930487839649	0.49346317713534	0.333333333333333	1.26028600434798e-12	0.37129063274433	0.703870110660598	0.185974980542979	0.207693224496116	0.19182408429738	0.128432158718401	0.387875135985867	0.441468118580867	0.355763948650721	0.396810411940504	0.375524279608456	0.172910662824202	0.190538672539634	0.181689843802417	0.282172964798069	0.239783400922685	0.239346753937333	0.233661525429964	0.391226572146818	0.468891138000218	0.370476415746342	0.383721774535332	0.373327099203527	0.395018888729133	0
2010-05-20	0.267049412502831	0.544695297545668	0.185949564369768	0.886297376093301	0.248167841490972	0.441697306357702	0.31743323951844	0.323284374850741	0.290959338549509	0.364215420826557	0.563713709270701	0.329067572920941	0.221159607505958	0.247823447170153	0.0535764718091719	0.317861502351116	0.275421086020585	0.461312346249421	0.333333333333333	1.26035973568327e-12	0.389610040201995	0.703199713677433	0.179292809292082	0.198443686929167	0.19122990253628	0.125940005490999	0.354465236768346	0.401414397729725	0.340504887642194	0.395450435317199	0.37145996679798	0.113702623906699	0.157714843464246	0.166578660827478	0.236360876108528	0.238506188295786	0.23738264979035	0.163167765020793	0.37515517289164	0.468341216218721	0.364502891706133	0.38139047244898	0.369761380988946	0.391217309397596	1
2010-05-21	0.27704478387701	0.557613407600155	0.186920085116368	0.756097560975611	0.285875791794546	0.477153418275508	0.360608197794636	0.335981542126123	0.303063952012129	0.39479426169169	0.528472259069547	0.333482903977013	0.220642230148161	0.186887093940208	0.0555280378540185	0.325207464027465	0.296025432669004	0.446865091109145	0.444444444444444	1.2604192415559e-12	0.413728714666231	0.690923860824778	0.173670116809737	0.189852020164582	0.193256781889831	0.122226390279409	0.327307672418947	0.423099569447685	0.336260375171742	0.392629405359147	0.361942143123859	0.243902439024389	0.182843062303694	0.165551244800968	0.286590853865142	0.24526075148083	0.239706299305399	0.181791919138305	0.431307663424986	0.56529584643426	0.361701150342141	0.380183680780751	0.369797688791669	0.389478053009095	1
2010-05-24	0.276794899592656	0.543400980837251	0.18831750380322	0.571874999999998	0.360365548951733	0.469022361678838	0.427460148947488	0.32731934391464	0.317078992378589	0.451930170693014	0.618345058018923	0.342319541285195	0.241988506306925	0.246998605523476	0.0621736577180689	0.433810075593295	0.411298399053403	0.491790334846526	0.444444444444444	1.2597529397019e-12	0.543941276648647	0.66159208491964	0.173716408849642	0.182988500878652	0.200772729376878	0.11840500902589	0.326454631097334	0.49955119080595	0.403785291758719	0.409145341660774	0.487858086425077	0.428125000000003	0.266111775226545	0.194844850636988	0.41368925571268	0.264307864982381	0.241156120495046	0.194666687307261	0.508473462599498	0.622915457209122	0.366776002624089	0.380073972447276	0.374916962027159	0.390949625867957	0
2010-05-25	0.271297445336857	0.5331031222088	0.187236431672506	0.711610486891384	0.307985638356617	0.451820730315133	0.372006091358821	0.320560175771909	0.307813329158883	0.408375194141176	0.5497186547457	0.334256231475014	0.259124401209134	0.274400228020668	0.0665468633080233	0.344641593222564	0.385682184301315	0.476377444279522	0.444444444444444	1.26005081600434e-12	0.513546119902219	0.65372673552075	0.181013832382321	0.179044772859391	0.208655073766365	0.117179484628477	0.310606839517434	0.330944847669156	0.372146048826234	0.418528458665505	0.435646053865335	0.288389513108616	0.271170468783552	0.216195161029443	0.397857919800767	0.269762384147285	0.238692025657817	0.132578577435741	0.418111328110115	0.39268159344997	0.365824467821223	0.380951639115079	0.372966581341688	0.389106691800902	1
2010-05-26	0.241061446929965	0.523540824910954	0.187990759496062	0.536842105263155	0.322422534623328	0.443029116321312	0.3922441098314	0.312240269468901	0.298329079888271	0.426307763088294	0.565052000100198	0.327938346934949	0.264646066458726	0.351011116275841	0.0704925888802392	0.31434943572011	0.382340938898868	0.487492790744456	0.444444444444444	1.25667204878544e-12	0.509879567931225	0.641585947941228	0.190040871143969	0.177803564250657	0.217668522090455	0.114334387527934	0.280759555313772	0.266235486956959	0.464804056807354	0.347752431690264	0.455421827803873	0.463157894736846	0.337645912188888	0.254361308439932	0.481535954131144	0.278444072714099	0.237668606382199	0.0983655549511794	0.434718894465272	0.532784224676835	0.366564550445674	0.380375670364333	0.372649586294714	0.388157443829585	1
2010-05-27	0.242560752636092	0.520821339601283	0.189213458858432	0.447368421052627	0.345323276164453	0.435081587350841	0.420949129632666	0.298080655531604	0.311942094032821	0.450313154715957	0.551350949233914	0.335521925058652	0.280702605148979	0.363551395119229	0.076640824366467	0.347715100402539	0.445267727311607	0.524629671159653	0.444444444444444	1.24767578101449e-12	0.584842562460468	0.624787871480954	0.197337137677291	0.178357439483962	0.228549405981694	0.11342333852604	0.282620578976903	0.421588578031878	0.484395685504477	0.348766927040316	0.437856831354845	0.552631578947374	0.414268810722741	0.307391318672622	0.567110669194214	0.290799900477034	0.240483663675505	0.0981307532163196	0.450814999682937	0.544482842125126	0.369313428765063	0.378702618278833	0.373957837957652	0.388244088395395	1
2010-05-28	0.239562141223838	0.508438824223613	0.190329819633306	0.442105263157902	0.346728883328154	0.453993079669237	0.430574600938775	0.263425914538457	0.305610554891533	0.460363968896523	0.583949061287077	0.334886088553572	0.291326681582363	0.34310704746401	0.0830319706320493	0.414317250183989	0.41018465058592	0.542238442818636	0.555555555555556	1.25463908172469e-12	0.542614315746882	0.609398043767069	0.207072213713562	0.180864420641558	0.240696643290268	0.111589627620992	0.279246593957902	0.417595799660515	0.474375101264764	0.347216994754837	0.544177946746298	0.557894736842099	0.467251092270616	0.361819433890226	0.604909731099558	0.302747657838396	0.23843690653539	0.0991560881420389	0.440098057221526	0.512773605401918	0.370687867924757	0.377962087027874	0.37491939289143	0.38836576187419	0
2010-05-31	0.221320588465961	0.506210179548229	0.189141005982878	0.742105263157895	0.290950544514336	0.374375647880937	0.35069586047926	0.213446448833616	0.284909942329607	0.422377600349735	0.537930242465623	0.327045913411129	0.288891439881007	0.370962156077799	0.0843216705835126	0.334592057902083	0.346700987939441	0.50104076926616	0.555555555555556	1.2912732112798e-12	0.467616606976213	0.611684796318625	0.209840129959396	0.183456816564044	0.250239539401774	0.11072487777332	0.281701489576392	0.368817944947948	0.497817049001622	0.318775394491397	0.395959031121133	0.257894736842105	0.394252709359785	0.371823836625479	0.450541801160182	0.302650483598785	0.235303273644751	0.112311230054901	0.369721838002471	0.39653817297272	0.366035919999639	0.378181503694825	0.370465361480273	0.385570712089204	0
2010-06-01	0.205327994267274	0.509073166459541	0.188182372907732	0.852631578947367	0.271853589414047	0.36077527574696	0.307900239570563	0.171473648915015	0.270201994382803	0.415028691458811	0.537291003566714	0.325164619236375	0.292022464925606	0.404444131515017	0.0854580479277138	0.334169853908274	0.353383478744333	0.493968475865303	0.444444444444444	1.25895712112208e-12	0.474362974776994	0.617010043020345	0.212449676130475	0.186083969112955	0.256976657027774	0.109623122421351	0.271345684331515	0.346868797819307	0.441918839268959	0.294918549348585	0.305155111779632	0.147368421052634	0.305679787721026	0.346605257956809	0.308197390833955	0.30016356691647	0.233846594517829	0.104376463632553	0.365146349879227	0.467667432868606	0.363445630814061	0.376343889109112	0.365618876877972	0.382217421295709	0
2010-06-02	0.194582970040032	0.515793514623204	0.187077960814742	0.82485875706215	0.265356037516342	0.337047029075319	0.269228636717553	0.123478347608769	0.272320214979546	0.42030016649287	0.549485010711031	0.330479883297444	0.304207593731654	0.27239466525317	0.0884690824472708	0.343854779579464	0.400717788612322	0.475299281539105	0.444444444444444	1.2601584351495e-12	0.530793473314144	0.620556642965581	0.214967581099784	0.188719498606025	0.261746218631183	0.10321751775373	0.272637691538911	0.355662028347127	0.401212843696655	0.270152239584644	0.262022610535679	0.17514124293785	0.256659004624606	0.312144322820572	0.254092304057052	0.298607995249382	0.234641658146916	0.0995806547502579	0.367990314096743	0.496295978165326	0.359903806825618	0.374890253690563	0.361762177033706	0.379118342444559	0
2010-06-03	0.194582970040033	0.510748379259803	0.185813964555493	0.821428571428579	0.264372280863803	0.377998751311338	0.270199743033953	0.112808918448427	0.256684331133658	0.424589662268972	0.581127821621584	0.332150417661399	0.309586534192888	0.355392954638871	0.088027463622776	0.32434226572282	0.370089705756564	0.443219669092024	0.444444444444444	1.25991602367129e-12	0.493711985583592	0.62097040810221	0.215655404285229	0.19097374388472	0.265524783843463	0.096826862413732	0.28445547779413	0.495813604767391	0.420717023460085	0.26721338350541	0.340916628902588	0.178571428571421	0.225217007154773	0.277850562314914	0.234060102316689	0.299027485261163	0.231211854563838	0.104698891055002	0.381924554420688	0.508725532717829	0.35541044803431	0.373985159939391	0.35910165664571	0.376531950005031	1
2010-06-04	0.177840722988282	0.507128908402151	0.186406201466495	0.773809523809524	0.279406573620988	0.365956706807635	0.311946800793557	0.116893288571155	0.253448531089593	0.436260323067631	0.555394803442422	0.333254419146541	0.319452385188122	0.378436799023343	0.0876898178103835	0.292157115543939	0.386239058535056	0.418255458724401	0.444444444444444	1.24883288324504e-12	0.513259560232334	0.616393486435195	0.216563050792576	0.192969565348926	0.269503548400861	0.0923681595352395	0.25351291595027	0.344590823705743	0.483415160192878	0.217168621807704	0.337729286233522	0.226190476190476	0.221449311054688	0.253631602672387	0.255860884440556	0.302862577122859	0.230928264333362	0.0854315473522142	0.410755180902686	0.527388480961254	0.351287130555227	0.372558951604211	0.358043073654931	0.374822070499568	0
2010-06-07	0.169844425888938	0.509832353486861	0.185344702299555	0.944134078212293	0.238255058536321	0.338766615415435	0.230866985205259	0.123509238627779	0.247319444466103	0.406832874671541	0.548830070366592	0.329700862496738	0.329478801570257	0.277719298193015	0.0879761259714972	0.304327353163663	0.376215322327717	0.42420007460859	0.333333333333333	1.26015987950869e-12	0.500158582055548	0.621912074069109	0.213146246693639	0.19384184430948	0.271574532140353	0.090042504430198	0.259112945487069	0.419971138771725	0.421848980062891	0.199242905819915	0.289016855803446	0.0558659217877073	0.1574390490813	0.214440541424091	0.178222768790162	0.29969285196082	0.229223575812892	0.0874932940655968	0.382813423061764	0.429135717464849	0.348115347879009	0.368499743265622	0.353851252480141	0.371442561831117	0
2010-06-08	0.163847203064431	0.51727799270857	0.1845960051058	0.90476190476191	0.217477974007385	0.425042668684743	0.225452667074433	0.145232854250071	0.247706239958533	0.390660111925079	0.53848031114155	0.327889260829582	0.337150258944489	0.287865091539393	0.0878197958579328	0.2821220759881	0.349485359108146	0.420961270920896	0.333333333333333	1.26015987950869e-12	0.466964226120223	0.629740685523012	0.211901403263164	0.194275754935441	0.27161000068405	0.0837617491226902	0.244126552231326	0.419297069314799	0.420918534699312	0.199585042934604	0.273596910427352	0.0952380952380906	0.128981507919585	0.178067832768756	0.166511436726635	0.294649644080036	0.22875475426031	0.10027315769602	0.371652553193139	0.465959654686074	0.344943565202792	0.365510191178417	0.349179574702086	0.367611077405695	1
2010-06-09	0.179839797263118	0.496563752145837	0.186775078531017	0.442857142857147	0.386804653730031	0.434237583185729	0.464058460533453	0.147533212980494	0.281770407733911	0.483132765569251	0.597021297157912	0.350269710228417	0.34127143720832	0.411257015792603	0.0868727719070578	0.338988394774658	0.371760328457787	0.447684499017532	0.333333333333333	1.27149480565579e-12	0.49704509098296	0.604158927111518	0.216588798890509	0.195616632904891	0.276821650863228	0.083355795370609	0.325570470238281	0.611943132269784	0.501583608546095	0.279568640142574	0.419449346853783	0.557142857142854	0.276788078612515	0.207032944314206	0.419837263707729	0.312773011654734	0.233494790797356	0.174744935241324	0.501507649753646	0.712934331676158	0.347269539165352	0.364879368260934	0.354735677223146	0.369402126141463	0
2010-06-10	0.173342805869901	0.477329100194727	0.185523921890555	0.709523809523819	0.324570586461332	0.327859029643462	0.337377689878452	0.135816796026446	0.281792373278494	0.437959352542691	0.56941073304159	0.345458189502297	0.348318473633487	0.403723917879617	0.0856468217162617	0.299138423443755	0.373987825392751	0.465129692928794	0.222222222222222	1.25900265416879e-12	0.498038426043211	0.599362899563041	0.226043002220275	0.198693669943594	0.282034729643162	0.078816190852649	0.33205901995017	0.523188707028059	0.447516044380136	0.292768719278973	0.400433013798513	0.290476190476181	0.279041433347579	0.227154275449945	0.400015285103666	0.317174477189996	0.230622129130501	0.153815815142159	0.424440455661176	0.395654210909623	0.346688045674712	0.362246368257524	0.353434064695328	0.36802371130986	1
2010-06-11	0.165346508770557	0.461209307472157	0.186446917357701	0.656084656084656	0.330883071425606	0.332100274458474	0.354214792923753	0.124287800662386	0.279259714444294	0.447200891051751	0.562707817042208	0.327070105300713	0.346311406297205	0.316758225789452	0.0879372093907027	0.340898223997292	0.370089705756565	0.480003152256134	0.222222222222222	1.26018391757816e-12	0.49348757918335	0.592407652605355	0.235751797211793	0.20321360884294	0.287696353145356	0.0779232326281625	0.317984823764246	0.418367849688888	0.41351325976407	0.268544216723897	0.404984079614179	0.343915343915345	0.299838749728662	0.248055982972161	0.415410064101768	0.323185430706647	0.229750994697607	0.163929821501585	0.431824023010813	0.519165530065963	0.345895100005657	0.359695649504222	0.35292387164406	0.367099047238352	1
2010-06-18	0.16434697163314	0.436161862686203	0.188418295188723	0.566137566137564	0.358516465262428	0.34501877878537	0.404190038548654	0.124866032575517	0.267390511171965	0.463719102154518	0.57457646877639	0.336241049183017	0.342645163296264	0.428495245949579	0.089318695374494	0.368450839439061	0.370089705756565	0.503970734543644	0.333333333333333	1.25850133545952e-12	0.494029167793659	0.580162953949037	0.244713761819349	0.208729537748616	0.294844019021719	0.0798791729858261	0.370159195341746	0.577544958395875	0.462243178985831	0.254102064657165	0.463571846245972	0.433862433862437	0.34618049445938	0.278674491862237	0.468915968693598	0.333132206879424	0.227432984047219	0.158158277792283	0.455651011649103	0.546103580004394	0.348062484834406	0.359174534920214	0.354103324637468	0.367205805904003	1
2010-06-21	0.185087367234561	0.399422793376577	0.191010830237568	0.10891089108911	0.493894921368584	0.377711655463799	0.665629497445108	0.129005019611252	0.29307743022509	0.554401980838614	0.594502729841551	0.358409695772336	0.345892152231404	0.491505002318232	0.0902887378046133	0.445903151059813	0.424106506429447	0.554856231260499	0.444444444444444	1.26501829455055e-12	0.558971182079908	0.541009189041491	0.263568377084924	0.217139546176099	0.309047666580355	0.0835364876273614	0.440346695490651	0.676885548092603	0.520253098446399	0.315489208421999	0.638174311267492	0.891089108910891	0.542164156017564	0.369645216886877	0.741552682915297	0.362950400421589	0.231909637255289	0.221318693317982	0.560687410616919	0.707116655654842	0.356520571970986	0.361917243257098	0.363649568164655	0.372269836002872	1
2010-06-22	0.186336788656333	0.372648431081795	0.19284438581311	0.125000000000004	0.520668530313212	0.399004056259072	0.692003017734626	0.145766748072601	0.310400550545935	0.572208364762506	0.593964598376398	0.359176317442399	0.352047158729334	0.583793185033558	0.0926306051788305	0.463667083209791	0.468656445128732	0.563922241421039	0.555555555555556	1.26461059658868e-12	0.611990346137984	0.504960956127928	0.278736228388899	0.227083207275573	0.328620237951823	0.0861166208661416	0.453185563323223	0.546888861500051	0.523742875961069	0.316448298121224	0.701241861702366	0.874999999999997	0.667010694617178	0.475239839370388	0.857891014190068	0.392260225558686	0.232820604041064	0.233625016251938	0.547845104401631	0.555201346238173	0.361066793806898	0.365482764095049	0.372069635161281	0.37758113017581	0
2010-06-23	0.189335400068587	0.347786523236638	0.191417236233444	0.202586206896549	0.494981888617746	0.424715436682813	0.629633904369491	0.156601986197072	0.315081405002248	0.551388649720089	0.561582661282687	0.334406268933779	0.362938844140889	0.506188881669684	0.094099369224943	0.444081604661959	0.470327067829955	0.593429411258369	0.555555555555556	1.26689562717132e-12	0.614811196403002	0.483112657214875	0.288646329934703	0.237139123340501	0.349545342208096	0.0878239097604903	0.442832435329085	0.521874291092128	0.512008010111085	0.318728573408983	0.659433635929187	0.797413793103452	0.722227952089201	0.565515669421843	0.856906018677644	0.41239144179381	0.232425449589046	0.224424167239935	0.506772999679769	0.476109004181657	0.367621811337747	0.368582024515728	0.376074044306292	0.38101265003183	1
2010-06-24	0.186336788656333	0.329514164753092	0.192443667237724	0.125000000000004	0.517508866161046	0.391066748979727	0.645434110574624	0.169931202976663	0.317011577397155	0.564739887336	0.576565015210828	0.332308193454287	0.378816976845695	0.572048223596266	0.0962312547087855	0.488975499228137	0.484248923673481	0.625839783434694	0.555555555555556	1.26279256198309e-12	0.631252515651333	0.462103261855852	0.300575990513562	0.247712999197274	0.371434767027842	0.0880280285734263	0.414192025257082	0.460357338572938	0.559344061648147	0.29829472588207	0.644412886429726	0.874999999999997	0.787053225331603	0.649038066080055	0.882781723587997	0.432487411707357	0.232521490268742	0.24201070158793	0.498006710978168	0.545497657047949	0.374916911493047	0.371955555770096	0.380352619255705	0.384734341654048	0
2010-06-25	0.186336788656333	0.305966427988273	0.191443663859777	0.306034482758623	0.456530953788652	0.339407864711634	0.559595958588632	0.168101028706283	0.306748789185172	0.526846004741684	0.549771953059472	0.33086395717018	0.390422286199038	0.568979959478849	0.0972596127596805	0.474643078832092	0.461417080090099	0.633029465992886	0.555555555555556	1.26324358877132e-12	0.604699390876909	0.458080859604813	0.314315312871086	0.259084899522042	0.39011988947129	0.0865771330765666	0.389210886720715	0.490000095719724	0.547225927390677	0.306544644168063	0.566893305937355	0.693965517241378	0.764904614884074	0.696745681798379	0.782182948554989	0.440155698001963	0.230731755133831	0.228577336343097	0.419680700985864	0.429263641688977	0.379093092016733	0.375246805774358	0.379450741898922	0.385646498315212	1
2010-06-28	0.187836094362461	0.286868763102485	0.192516832458409	0.142241379310347	0.506075682606272	0.404305217042293	0.628575793211755	0.175310657553021	0.312931333779267	0.558942894209191	0.569768713023481	0.332838838865016	0.398548678836161	0.631612387528754	0.0984575310607127	0.425802592028064	0.478123307102329	0.60186366492124	0.666666666666667	1.26266713683651e-12	0.623839095778409	0.445258800083576	0.326125019325379	0.27068613195963	0.408220769700242	0.0865482786292152	0.372893351498708	0.478879604526227	0.575915353162284	0.310078371657	0.572391157786334	0.857758620689654	0.809279052025728	0.744526522581744	0.811198746612841	0.45422137446186	0.232478955322709	0.221843416743299	0.444291544455441	0.584665248126236	0.380097489864203	0.380156253697382	0.382246202350183	0.388322542186104	0
2010-06-29	0.201329845717602	0.260776274680063	0.191168786550589	0.564655172413797	0.382404655480748	0.367876325847718	0.430838337691308	0.174557168849797	0.293759712557701	0.469306137724944	0.534235022735129	0.324860531401012	0.407968514867775	0.556464082438574	0.0944634634444455	0.396714403784395	0.445267727311607	0.561395274245654	0.555555555555556	1.26777789336931e-12	0.586291645526892	0.462226745803865	0.33282620173701	0.28138779945453	0.418716282033941	0.0887158420711807	0.375300769341675	0.493468394142376	0.516001879122992	0.362541994641459	0.487881818937946	0.435344827586203	0.686342605143304	0.73212061858125	0.586434689568183	0.445677305195441	0.228892112942494	0.191859565452593	0.331228654603041	0.316772617993741	0.374705459314632	0.379717420363481	0.375349901119442	0.385535350526225	1
2010-09-02	0.230066538418367	0.240906821592184	0.198353521253459	0.324000000000003	0.465968813406613	0.248454957942958	0.561180782517856	0.181091084169597	0.233889132496272	0.5322516918611	0.574506661928373	0.364507674265353	0.422945697346073	0.706185644495609	0.0888351355342165	0.444086314790927	0.49482953411456	0.53041342998462	0.666666666666667	1.26380699140213e-12	0.646675695328496	0.456834565631989	0.343866552377644	0.292289738651166	0.428270463471782	0.110482216022571	0.622229901545732	0.874574990384825	0.555286666767272	0.382062661582977	0.553952656530893	0.675999999999998	0.691277457752314	0.72562667031141	0.603871650508931	0.453042752146754	0.219934724774569	0.251107558521715	0.429501655903858	0.646662710389617	0.373859650600975	0.382679545367316	0.37683069374263	0.38670812897387	0
2010-09-03	0.23081619127143	0.215899304690081	0.195610121211326	0.496000000000003	0.417323587865938	0.229024413939735	0.479691298667902	0.178188264541422	0.188637503645853	0.493600611087524	0.552980658162437	0.365759851073223	0.422865414652622	0.657605066454152	0.0846194089082079	0.399249334596811	0.416867141390813	0.482461257841417	0.555555555555556	1.26393521980677e-12	0.550645395457273	0.464550080395105	0.350239386108837	0.30236236012029	0.433946660165322	0.116422258827112	0.617902113368156	0.632206523207407	0.554164970811637	0.382845649339165	0.470388026104868	0.503999999999997	0.63246394789781	0.700123227235222	0.5198932043349	0.450362349428246	0.215170496348808	0.243626585615067	0.384832925660786	0.42555763726974	0.369789196166496	0.384352597452816	0.373974241009878	0.38548402874907	1
2010-09-06	0.233564918399331	0.198783229489855	0.198287325815158	0.330578512396692	0.46851244264035	0.306895907516522	0.56241508149065	0.180783224495792	0.197530101720773	0.531403455479361	0.570605699277744	0.332931854635629	0.433471650487461	0.708855273748687	0.080709717602234	0.360080481637449	0.472554564764919	0.46680975752435	0.555555555555556	1.26288840166233e-12	0.618263292775693	0.458615323697945	0.355412896586678	0.311517265352195	0.43969163746178	0.121856120290089	0.609204157551103	0.683097137959097	0.596923220414574	0.383674365130947	0.502320927123603	0.669421487603308	0.652983073485666	0.690508263872904	0.57147150830168	0.457425882014736	0.217982556307209	0.232547411942409	0.451562139170398	0.598005008940434	0.370264963567928	0.386766180789274	0.376002974161407	0.386716920899331	0
2010-09-07	0.213324291366617	0.182889731089646	0.196560516867334	0.480000000000003	0.449564002142073	0.301377286991851	0.523798631980045	0.180616096795819	0.197914917816684	0.512961952041112	0.567531143175915	0.340930429331617	0.445665699592781	0.639321846407211	0.0772706375109668	0.333624250407168	0.461417080090097	0.452192182696204	0.444444444444444	1.26653819293232e-12	0.604963416745017	0.458698532493407	0.362588493339863	0.320362449108671	0.444080126473703	0.124660599356418	0.570208859393797	0.446915719264035	0.519763967082715	0.340882586496533	0.491155230454933	0.519999999999998	0.612711419930327	0.66959961609064	0.518115172753376	0.459917439116843	0.215639742602975	0.155210375406628	0.43152084017697	0.479364817011476	0.367886126560765	0.386053076621685	0.375925268393324	0.386913131313971	0
2010-09-08	0.21182498566049	0.164922684984071	0.194406533146625	0.675000000000009	0.404584520257566	0.280023558730975	0.441382960006535	0.174637109327447	0.198153988415208	0.474726476006425	0.555082864622933	0.323062593447851	0.450241813119503	0.617655103730952	0.0743236465953771	0.31881432966979	0.430232123000597	0.478356494571019	0.333333333333333	1.2648776625995e-12	0.567124284271829	0.46938347230981	0.366484793134996	0.328264629621381	0.444866789948338	0.128492406320479	0.551489770042037	0.568527782316275	0.531383018336522	0.331140216656939	0.375511002791807	0.324999999999991	0.515455713330643	0.62064634542075	0.387405593456375	0.454150796401107	0.213886317852912	0.136452909661206	0.397436310952682	0.432867603193603	0.368626209185215	0.383639493285225	0.372387365367	0.38509315076197	0
2010-09-09	0.212324754229199	0.157643408842218	0.19234106791272	0.962162162162172	0.358657343883697	0.274265249400704	0.355011924275522	0.17518506266122	0.182693005652737	0.434762658295734	0.556428478831099	0.317645102439879	0.44135719504423	0.593381773276077	0.0708096377531319	0.277800607556609	0.35171285604311	0.459618832571528	0.333333333333333	1.28328156213224e-12	0.472063453656293	0.489040107673891	0.366808583988826	0.334655019184324	0.440670505698318	0.131418432822587	0.532238174062329	0.609631101377083	0.500712350159954	0.34240925210529	0.275103612260484	0.037837837837828	0.346933982859527	0.527339339059455	0.171124172173516	0.441096031779533	0.209449376282523	0.141012350401776	0.345132048044367	0.4226411587913	0.363498493858664	0.380540232864546	0.366185115534572	0.381420429537458	0
2010-09-10	0.207576952826463	0.155325812701683	0.191234054876494	0.900000000000003	0.356539846732675	0.279470680604224	0.353365881811958	0.177316440280002	0.187438778687518	0.433352781144101	0.555604296713246	0.324887010646522	0.430590393822489	0.54291959341116	0.0693932036381927	0.303450950333815	0.337791000199584	0.464117656017923	0.222222222222222	1.23873655632713e-12	0.455837355009024	0.504045594187723	0.366943828175278	0.339796003225301	0.43357908200609	0.133297792638982	0.482389036729034	0.392927155606407	0.487957594401575	0.340932608640539	0.252076548997155	0.0999999999999975	0.257030827326383	0.432767574491527	0.109650690571199	0.430747596780048	0.209376111993492	0.13333944466519	0.364292215524811	0.506643728500672	0.360538163360861	0.376892430776489	0.361871507995984	0.378313910867502	0
2010-09-13	0.192833780049549	0.1587628791793	0.189026478283495	0.860360360360362	0.344319930164488	0.302858332464053	0.32908931440825	0.175186589216022	0.200439050959971	0.422324189403148	0.561397152434228	0.330600725350457	0.421277601382142	0.457529461954521	0.066119854162536	0.271447243660487	0.341689119835771	0.435677883944787	0.222222222222222	1.25984455749428e-12	0.459753882743629	0.517799632177816	0.369577810701647	0.344467206888909	0.424493978906819	0.137481925809643	0.481171487793995	0.458182907686634	0.415488711824332	0.278690132755889	0.284719835495483	0.139639639639638	0.211407930164591	0.353294495015582	0.116341405652291	0.420794217564932	0.209376111993492	0.151675063974664	0.364060416713762	0.487829459032168	0.354670365409859	0.374094868272867	0.358012510893583	0.375213606599446	1
2010-09-14	0.181838871537952	0.161954440908516	0.190342926502396	0.819819819819825	0.358750785704008	0.29859917697255	0.333023158221995	0.161241576065017	0.209032226714457	0.428539594902614	0.569362148078471	0.331845797863338	0.407388695415073	0.444978283080792	0.070072225597738	0.343071895405103	0.336677251732102	0.425293966041389	0.222222222222222	1.26004149897775e-12	0.454445586235384	0.524768836539062	0.37364557597375	0.349066554798415	0.415378094817441	0.139554687948548	0.446581704966838	0.431446077845081	0.407176402171516	0.274726594492217	0.334747335430992	0.180180180180175	0.19563049024719	0.294632220102816	0.156177827834044	0.41538584957407	0.208185402030261	0.132094501854338	0.39991690990954	0.529612246864766	0.350124143573947	0.370501920351547	0.356244330585019	0.373134036250137	0
2010-09-15	0.178840260125698	0.169415766740967	0.189203439785266	0.936936936936941	0.327599607612523	0.214404764364205	0.286488653590282	0.168023402029334	0.204058063324213	0.407718721363657	0.560511895153742	0.331372694276012	0.395622820674827	0.451838183007923	0.0751200572666735	0.278746511293877	0.345587239471958	0.403923755389497	0.222222222222222	1.26009580815846e-12	0.463435130716994	0.536440060636564	0.376364051593646	0.353322362481949	0.405239900606872	0.135759334222713	0.410726215132023	0.448094941752517	0.400848867647563	0.276301395346263	0.330875943726562	0.0630630630630587	0.142825147381662	0.236512963543701	0.123165931624155	0.406361515652012	0.205093450138249	0.094927434818874	0.389112208378339	0.456165417282813	0.346265141317882	0.368883722432785	0.35274147759202	0.370112225370169	0
2010-09-16	0.179090144410052	0.185358847342256	0.187945972609137	0.967346938775516	0.294488828025769	0.218332681347192	0.244758306133802	0.180345246410591	0.197051292639162	0.382831140891813	0.549487581396119	0.327094860307558	0.377264844772304	0.409637486169811	0.0783446446165235	0.286377840694246	0.308276665811307	0.412231189101322	0.111111111111111	1.26038952468892e-12	0.418018327279271	0.552445545395912	0.377346110037179	0.356935209543326	0.393381280132671	0.13578237291191	0.385923497175762	0.515198142909003	0.369857989431936	0.273354486255966	0.312270664043612	0.032653061224484	0.0966415572111341	0.181139694381224	0.099760020661749	0.393893957350619	0.202606674739023	0.0817146310301649	0.371385382658503	0.448752615759774	0.343146221686269	0.364605097427245	0.347814014667273	0.366167143008448	1
2010-09-17	0.173842574438608	0.200163136472024	0.188916482366825	0.959183673469389	0.298247991185458	0.208271382532196	0.266054200384999	0.193124337067943	0.193728130000246	0.386870686725712	0.562114803605228	0.329889901949692	0.370342692536951	0.41159627448778	0.0810894768423271	0.259358022631349	0.363964089185413	0.41180814376466	0.222222222222222	1.26019405831288e-12	0.484298802688623	0.56252907493451	0.377925346166272	0.359948287920442	0.381481024703852	0.135955839481115	0.352865386530621	0.478685302888218	0.397149896809437	0.269385192725204	0.329853531250134	0.040816326530611	0.068799977476844	0.134200606643057	0.101965983278795	0.385313053584848	0.2006997012121	0.0787888346273441	0.387672900762592	0.515121097092192	0.34023875423307	0.361560691173303	0.344707813701079	0.363040913289668	1
2010-09-20	0.170843963026354	0.216370327362757	0.18978542769114	0.923694779116471	0.308197416551324	0.22087427246136	0.293228716539511	0.207611606245577	0.201281118339834	0.394252396712377	0.563714481726193	0.333503383632131	0.356275380584435	0.374150598786719	0.0839918380027179	0.273031115800509	0.328881012459728	0.428746789980424	0.222222222222222	1.26047693365901e-12	0.442498475851499	0.567061228599145	0.380860074289844	0.362980926505157	0.370789297110517	0.131931046465526	0.320585093320622	0.450290986391104	0.376586793571784	0.255652146591579	0.345082845512349	0.0763052208835292	0.0630527697451259	0.10083876155367	0.130910427325076	0.380549732504928	0.200425532772397	0.0806857417870427	0.406853654290706	0.521572611039003	0.338177095493528	0.357446628667976	0.343083948849377	0.360737001326329	0
2010-09-21	0.152102641699768	0.231419861761295	0.189196456068944	0.95983935742972	0.296329122065525	0.146352989721935	0.299038573038388	0.22135410591697	0.209090993670702	0.393258448475958	0.5634763273781	0.332862188713517	0.344545187041278	0.386778326440657	0.0869776800479576	0.292287662275334	0.347814736406924	0.435242325195217	0.222222222222222	1.25994991053378e-12	0.464498052137394	0.571478679702339	0.384223612810707	0.366120123035785	0.361137610163071	0.12461637818714	0.279266118082811	0.353590284702593	0.43094312467877	0.20227255077848	0.350843194443236	0.04016064257028	0.0461707070875059	0.0725196213253018	0.132076042393578	0.375884221399655	0.199512303586852	0.0820002706797949	0.405265395795435	0.491392748894511	0.335163901951121	0.353524555746231	0.341196887855207	0.358394940213587	1
2010-09-27	0.122866180430294	0.248576275072566	0.190024280274991	0.867346938775513	0.314007209868869	0.141641432231182	0.328606275626019	0.224604987265083	0.229275282056016	0.408984130843258	0.560552972560689	0.333063873929942	0.327088161365264	0.144366309390893	0.09321974095939	0.327865528807882	0.327767263992245	0.447252807739766	0.333333333333333	1.26066502448271e-12	0.441126081536693	0.570676873038953	0.382473773800068	0.368260506328206	0.353473669226556	0.120944624527049	0.257652952767293	0.144672333263604	0.391876428647669	0.147553842675061	0.351684645539627	0.132653061224487	0.0683118983292803	0.061611505484581	0.188373225237035	0.374978888945994	0.200916221125809	0.0866440829167241	0.428922328054677	0.52806292126602	0.333948051925238	0.350891555742821	0.340653944460311	0.356884968157311	0
2010-09-28	0.120617221871104	0.268886654642312	0.188940657398383	1	0.256263541114245	0.10917378313685	0.279226440143012	0.232346356372353	0.227950575155804	0.377520342653085	0.559405811629534	0.329407559141133	0.313993162033435	0.163196604346363	0.0962510196274913	0.297516172391132	0.312731659681236	0.452374843104937	0.333333333333333	1.26066502448271e-12	0.420263294375038	0.58127761599502	0.381567643064278	0.369780709071447	0.345019876117757	0.119690467137163	0.255210460287516	0.337782129807565	0.389177342527842	0.150586238612889	0.325681565026907	0	0.0351761363253027	0.0424098323947392	0.146875733958467	0.366087087230551	0.197975853543471	0.094005064451585	0.381468762530737	0.41693161812882	0.331992119274904	0.348258555739412	0.336448334382169	0.353465890247485	0
2010-09-29	0.112870809056115	0.291453607745936	0.188002310906856	0.95067264573991	0.251186553541526	0.0980235326897774	0.290920209962866	0.234141606769738	0.230307838473542	0.383966569030907	0.556855766948813	0.328488856833426	0.302173765497555	0.0169811264683124	0.0998547589177153	0.302231150668294	0.332222257862174	0.455039465084571	0.333333333333333	1.26090607497046e-12	0.443341656990082	0.58859558149839	0.380294842216452	0.370727031622275	0.336643338132799	0.119368885607635	0.245891911015405	0.319048179225961	0.357894810744175	0.112062804195547	0.314547272848532	0.0493273542600897	0.0308960759066608	0.028067802051187	0.155790941648581	0.359335113208299	0.197180176703236	0.0968298638064317	0.385463924907833	0.501931050558839	0.329719008356948	0.345570701569265	0.333287045696132	0.350465332985097	1
2010-10-08	0.130862477529637	0.268668172635145	0.190361479871103	0.383333333333343	0.447942337374823	0.182985498371284	0.459432407665805	0.224309858389133	0.265492393259251	0.484062107365928	0.596416165118978	0.35350288546734	0.301799112928115	0.151243510522574	0.104170494988374	0.369942092199876	0.411855273287144	0.477708626962973	0.444444444444444	1.25988044873055e-12	0.544587085589998	0.561745652550578	0.383647313568036	0.372194829034918	0.335594638043336	0.124330967300157	0.320162254817255	0.532286521147678	0.439407850203026	0.247245750978703	0.49731669096791	0.616666666666658	0.232889835036984	0.0912286002510729	0.473614225304457	0.376967244761985	0.201752684678552	0.132677562674796	0.519684021900941	0.725624452958059	0.332467886676336	0.34592725365306	0.340118235753994	0.353088578629108	1
2010-10-11	0.14610541887526	0.261239671191192	0.194203335533253	0.142222222222221	0.558980574177329	0.228820849637336	0.607031619878717	0.212064291734897	0.307722349874798	0.565147779022379	0.59875428923067	0.381728559723756	0.307686510447875	0.346851782629309	0.107830759265214	0.451268040275929	0.458632708921392	0.526355567613047	0.444444444444444	1.26450159794755e-12	0.60148063064446	0.516457692925954	0.385869157555306	0.373840108126773	0.344751358269547	0.134438971452618	0.441671967767757	0.574074229906826	0.519004094939324	0.286378629138144	0.712852548015032	0.857777777777779	0.454609449107487	0.213159688128188	0.759169479859438	0.409508137927583	0.205762193354306	0.213825629170932	0.605376342424389	0.676901229859506	0.340027302054655	0.348285982822781	0.352002109455049	0.35939903309288	0
2010-10-12	0.142856923178652	0.254341776993234	0.192104038345157	0.173333333333324	0.547359347349758	0.268129742433981	0.592253941822921	0.214541265150882	0.324200203074432	0.556090725550112	0.568674262561784	0.359539059558404	0.319657552071386	0.461410174344732	0.11408158730561	0.46977631019266	0.460860205856357	0.561741795548212	0.444444444444444	1.26287758170595e-12	0.604529154722172	0.484956141844044	0.38628369368041	0.375244214968622	0.359476040305636	0.137181661719293	0.452355509242825	0.485924315957712	0.542535264948556	0.272848108634488	0.688802770334408	0.826666666666677	0.5911893499308	0.3436188184114	0.868461114515775	0.434098130886627	0.205599440227581	0.206411961192454	0.560180229030211	0.496952358507084	0.346793771763919	0.35116582657651	0.35929898181302	0.364206654906767	1
2010-10-13	0.147104956012679	0.257292694529591	0.195734606358064	0.00409836065573945	0.613287825263134	0.447285869467644	0.691464437302305	0.214320985541074	0.385061475819584	0.609046909574905	0.571731215530496	0.349968653586055	0.335375119389289	0.581021826223675	0.12398873455836	0.511774582579472	0.487590169075928	0.621046745118632	0.555555555555556	1.26236122106683e-12	0.635369039417073	0.446100759295815	0.390757334376833	0.377315932880618	0.380676467909689	0.124206005447385	0.517096064942307	0.669543649331384	0.580231416285441	0.286767846862676	0.70022057189935	0.995901639344262	0.743347670426975	0.48537188060572	0.994534710750485	0.465689909740954	0.215111138636184	0.198851546876925	0.594493248373131	0.621902535777542	0.358846545933546	0.35640439949996	0.369258631418676	0.371034764476674	0
2010-10-14	0.15610079024944	0.274122031916946	0.191322562110654	0.298742138364777	0.578468610778918	0.381901089183343	0.634000060659	0.236121282286475	0.336239964491259	0.586873228000085	0.581612018836545	0.343456815384019	0.351895513641704	0.718435481130259	0.122855701516417	0.492204769276382	0.490931414478374	0.675152072396669	0.444444444444444	1.26245756554223e-12	0.640745225882423	0.423946217286427	0.392814079603289	0.379409346674023	0.403397143910101	0.130297940783149	0.582147863035335	0.591912434076253	0.575268488323977	0.289109866118432	0.670783933567335	0.701257861635224	0.738400598428517	0.578092868425162	0.873302193625609	0.486126301520869	0.203872205902236	0.271684809123511	0.515612442566172	0.472253992419999	0.370053511389514	0.361039576589295	0.374110654652737	0.375605750171224	1
2010-10-15	0.179340028694407	0.284883271349475	0.196460705033309	0.0703363914373031	0.661198611708584	0.446013394709211	0.73051294140199	0.260411821309945	0.365168123495233	0.659400220609517	0.565065479026987	0.361983826101378	0.377800062728646	0.763314793807943	0.121726798674463	0.562091147365141	0.552187580189891	0.702077228565082	0.444444444444444	1.26218623032073e-12	0.712729352520269	0.387413681447539	0.401421840481994	0.38290896267255	0.430992016222439	0.139282406768269	0.638978350032985	0.696821527223054	0.619723006069625	0.314593467655459	0.644473947360474	0.929663608562698	0.817572178986733	0.668410353290915	0.918971787842155	0.518492246213048	0.212469862903051	0.340589851593553	0.556124226409596	0.664169628834376	0.380256078998014	0.367759212014663	0.384585696646105	0.383459027660486	1
2010-10-18	0.194083201471321	0.306019899921388	0.20118190117741	0.225316455696206	0.663044402983583	0.37130839689375	0.688811025170368	0.303305079637318	0.306890693320632	0.655296515323941	0.587285248070933	0.370632826538519	0.401349652807684	0.831674633624982	0.114057089382262	0.556469017029051	0.552187580189889	0.692965203313511	0.555555555555556	1.26204584954861e-12	0.712521710015068	0.362227566927651	0.407403789765024	0.386976856279301	0.459904261867537	0.150214403602753	0.660763223486999	0.706183702841558	0.638341147977291	0.305406094337201	0.646931306866628	0.774683544303794	0.814395147113658	0.727478209212945	0.841690954501572	0.543330471121129	0.201527323373965	0.401885157309076	0.513694049758347	0.514499713874154	0.386229603038223	0.374780545357088	0.391747832291988	0.389986001456146	1
2010-10-19	0.199330771442765	0.315830086109068	0.203734489954382	0.129113924050636	0.697698664428177	0.438466833967011	0.699731952478503	0.337902119385066	0.315987587311903	0.681233030328552	0.551120613341589	0.342371235259023	0.428726051274565	0.790339167207025	0.110450574682225	0.625756000619344	0.570564429903344	0.695878254227073	0.555555555555556	1.26189834209902e-12	0.732127500613505	0.33660230775704	0.420343921200749	0.392974538646611	0.490087518792343	0.151669642664248	0.622655280683932	0.594352237604347	0.680690633013635	0.292554293841416	0.608099005970829	0.870886075949365	0.847012622487933	0.778599781217785	0.843763252237251	0.56924745175314	0.207068401882271	0.429358138416596	0.529058434517866	0.580244168880212	0.394581964085596	0.382624691200578	0.399919301411693	0.397255986618899	0
2010-10-20	0.212824522797907	0.330637788525193	0.200482971748086	0.149367088607594	0.681991439789746	0.461392427815653	0.658942319001466	0.371840269632832	0.307134326543175	0.661757705175339	0.577040305476097	0.339232045800963	0.451401452024912	0.833678835567884	0.105063209629785	0.623311579589592	0.571121304137086	0.665520449574182	0.555555555555556	1.26192512168848e-12	0.733769827724689	0.322547715267632	0.428143119385551	0.399426150487961	0.518280047754975	0.15599971973505	0.606922650963226	0.672887291246244	0.674648174037185	0.295166442348234	0.602356415398343	0.850632911392407	0.861444869939629	0.817876752570185	0.824633701895237	0.586468405662868	0.205048709814898	0.435166661296525	0.485599074294773	0.496307515764751	0.399498227233733	0.391428784961978	0.404651850223613	0.402797896534274	0
2010-10-21	0.22032105132854	0.331088406333809	0.198043435035646	0.306329113924053	0.569612405249005	0.418985029590085	0.582151066704312	0.384851255984536	0.273249350035849	0.595188311013317	0.548600509776683	0.317251709048479	0.472917213869851	0.792485401549358	0.096259349004379	0.487284744844904	0.532140107775212	0.631007729050943	0.555555555555556	1.26219542270076e-12	0.689707448572647	0.329977082970866	0.43430599461717	0.405893997903629	0.53901273499961	0.16086453635875	0.572844448623065	0.645179633303158	0.634958685256961	0.325625171998846	0.552151954977131	0.693670886075947	0.814392663224297	0.827121581144867	0.721768214621757	0.586263241153168	0.199879992093194	0.449666521530722	0.400121285875948	0.396203488510144	0.402194242508518	0.398642107887986	0.40226487893879	0.40418367329992	0
2010-10-22	0.226318274153048	0.317648469746876	0.195677645472634	0.389873417721522	0.517236537825742	0.407877433904191	0.542276304201876	0.385520270602526	0.254915665282878	0.55733815584923	0.550464480102579	0.312642347574623	0.495057396663855	0.752695807121091	0.0894321784213839	0.400636429580185	0.537708850112622	0.57814754549126	0.444444444444444	1.2623442938729e-12	0.700126228343219	0.345948566922389	0.435794717438641	0.411383891933132	0.55131904264704	0.16144214492237	0.542222673190478	0.701325462952894	0.621211019721303	0.333767518602405	0.504653483791772	0.610126582278478	0.752859488873058	0.811131517524685	0.621038052539357	0.5783096963187	0.198542601281339	0.32255693322772	0.354525068353274	0.448110469951948	0.39886387069849	0.402207628725935	0.397723788518885	0.403641669130261	1
2010-10-25	0.236063761242873	0.308533576118136	0.197736113451879	0.291139240506331	0.564034110483741	0.458217790099205	0.571789434561482	0.38780805782767	0.279647793132062	0.585034505449024	0.567746617818397	0.333142440712553	0.522451635729281	0.781351335260351	0.0837518501784478	0.433170997433684	0.561654442163487	0.549082974921152	0.444444444444444	1.26225608576182e-12	0.727806350520516	0.350371195476379	0.440168983894741	0.416703171798468	0.55980456579619	0.164151132484599	0.508342560125569	0.626156390484748	0.639710267795829	0.335974679171869	0.510397104405633	0.70886075949367	0.747486961278285	0.798537248188694	0.625719852962434	0.578516223248525	0.203184132113045	0.245325221609475	0.409000327502579	0.584765551989579	0.397489431538795	0.404593784979025	0.398182494086551	0.405178727519067	0
2010-10-26	0.242810636920444	0.305819209138954	0.195879864765287	0.354430379746834	0.524187805866626	0.455866935633513	0.538922160099943	0.387217775468131	0.272132387388013	0.55347403825147	0.579956297078817	0.33594608540014	0.535832084637825	0.811575385836355	0.0719461794286444	0.375146757866671	0.492045162945857	0.496969443357944	0.444444444444444	1.26216247074939e-12	0.640243304881084	0.361850004969867	0.444970420149328	0.421976522297798	0.563339049585083	0.166767908161101	0.474375647869223	0.567743616961749	0.654394767168058	0.323243711344364	0.511802021505426	0.645569620253166	0.721052975805241	0.780624258253024	0.595738195891457	0.572564846236136	0.199730287318478	0.270192901706421	0.387822596766103	0.463586547820175	0.392784620569073	0.406486253731476	0.39625361883619	0.405166758986144	0
2010-10-27	0.253055892578978	0.296698493157286	0.194143478234763	0.42134831460674	0.508276728318341	0.460280842089779	0.521301834893684	0.377231442526646	0.26063367616718	0.535084187999996	0.555358462199337	0.327300552304309	0.536991723543232	0.792447099514282	0.0696597818281996	0.382129849937554	0.44081273344168	0.457307395991607	0.333333333333333	1.26219209418377e-12	0.578363497782728	0.374694777272559	0.451202551618407	0.427516443281269	0.562541852435605	0.168516361024082	0.442546648633774	0.579843233320299	0.651124875768804	0.32462691652686	0.473469333893119	0.57865168539326	0.679268504569637	0.753638945448233	0.54674534747901	0.564821120573199	0.197729464171279	0.265844537529772	0.39579487848245	0.49172202664678	0.387974083510143	0.406541107898213	0.394073830417761	0.404649141846065	1
2010-10-28	0.236813414095936	0.288229256888594	0.195834150238496	0.470802919708029	0.536493400202738	0.492716711363671	0.534081398818726	0.363248190073012	0.272167393886785	0.544212002415292	0.563840063880521	0.334552996053882	0.537972956463192	0.789985976789514	0.0681654144757079	0.342029277213886	0.456405211986428	0.444558472291955	0.444444444444444	1.26243613307613e-12	0.596338920500192	0.380661276461416	0.458209859228532	0.433433961565331	0.560054232729973	0.171145550530322	0.414747723042872	0.43115396044008	0.592604070171302	0.270523662330248	0.455920787586864	0.529197080291971	0.633555796832241	0.719191166718174	0.499074316713011	0.561813685447187	0.199779230047941	0.198575998417336	0.437967072922751	0.550744938224422	0.387551179153314	0.407720472483074	0.394497768467004	0.405292068791781	0
2010-10-29	0.220071167044186	0.277150025346765	0.194258001230892	0.730088495575229	0.477308612578011	0.471178570892114	0.489757678474428	0.344515392800876	0.262906811648225	0.503607356132298	0.562122175530496	0.33106646268371	0.529989288614428	0.734682242791964	0.0700603727356271	0.317133242012638	0.40461590824851	0.45569333251248	0.333333333333333	1.26525039475376e-12	0.536231445927596	0.395585013069702	0.463314479187821	0.439250179141861	0.553964257504159	0.173727430534575	0.388130308116612	0.34372533011525	0.515888237366655	0.241096398003085	0.397255562208709	0.269911504424771	0.509461362768391	0.651549282441229	0.33852737889363	0.551429615870693	0.196776358079442	0.14093411429132	0.400623255467324	0.442027148790788	0.386969685662674	0.405690868313779	0.391562456127687	0.403989930994601	1
2010-11-01	0.219821282759831	0.266862167486497	0.196856978946065	0.712918660287091	0.50053463492561	0.472556999713479	0.498299048378456	0.320802943732508	0.258356714833387	0.509067878856212	0.565930922227253	0.331604752050281	0.524735232343006	0.738844837168543	0.0713287512753491	0.304067796281354	0.424663380663187	0.453766799363052	0.333333333333333	1.26387177731628e-12	0.55938789081551	0.403948159935661	0.468408261990105	0.444983058625153	0.546684463130528	0.181065619888654	0.400465738755798	0.516844525029245	0.53027239320344	0.241248413343703	0.394547784373558	0.287081339712909	0.432931189756237	0.578902164171172	0.276742072917961	0.545540291123887	0.195894830245142	0.10674321390539	0.420402935948447	0.541551105883323	0.38517234214615	0.404045243311648	0.391035775770577	0.403737065050662	1
2010-11-02	0.217822208484995	0.260122101303299	0.199669337434187	0.74468085106383	0.513785269159735	0.476722869862621	0.499820415250783	0.290917896669561	0.271715351749698	0.508161828198023	0.565921758646918	0.33886979180554	0.511131775952653	0.733299657255264	0.0747842621899984	0.314748091946782	0.384568435833832	0.473033570361666	0.333333333333333	1.2709167524819e-12	0.513875663165531	0.409028291779919	0.475019344929985	0.4509709422535	0.539315529485579	0.188310816006424	0.416608112078527	0.443351242186151	0.499450760565656	0.220237426451296	0.396182577133493	0.255319148936171	0.370442816234976	0.507973576820204	0.24026643382012	0.541866584520375	0.197726323745008	0.100107715938944	0.437579249316705	0.527971433528702	0.38517234214615	0.401604232891821	0.391489139958874	0.403987216966541	1
2010-11-03	0.21582313421016	0.265718632612374	0.203672801463855	0.537234042553189	0.568642210051165	0.530286510785989	0.542446533058287	0.245225349797766	0.307777925219448	0.530170154944261	0.573446654212266	0.349012321840159	0.498340066796085	0.730723877687408	0.079995004112887	0.38034449987675	0.405172782482253	0.503345829902853	0.444444444444444	1.26335578445148e-12	0.537154695191131	0.404074864477623	0.484831049077109	0.457841375639672	0.534418892131954	0.198970657954099	0.463468744997149	0.468145838163585	0.535645844810676	0.225210410752219	0.481422282666854	0.462765957446812	0.403685961791145	0.472656108199352	0.347585494876384	0.545793569353618	0.202313025262181	0.119169006273144	0.479847500100528	0.584163677034419	0.387762631331729	0.40045229539033	0.395277481932008	0.406172403061694	0
2010-11-04	0.195832391461802	0.270915411685086	0.200976306267291	0.633333333333332	0.543840071376988	0.527334375485527	0.518657248294208	0.172059811927515	0.316374850648973	0.506500208367872	0.567458405109619	0.343667469899792	0.478777850491793	0.710766511089452	0.0851453617704666	0.394229467337461	0.376772196561458	0.508289065947996	0.444444444444444	1.25522915477821e-12	0.505840402562302	0.404837565557294	0.493069808358265	0.465084377273675	0.530132073866336	0.205389358949718	0.460266985934806	0.382320190151863	0.477345543280363	0.177925271832097	0.485568837486129	0.366666666666668	0.391149839007685	0.444597851938865	0.356910599795933	0.545487925395362	0.201215500389866	0.107312023897522	0.4550339297627	0.486534184475125	0.388555577000783	0.400644284973912	0.396641010187118	0.407300110478827	1
2010-11-05	0.181838871537952	0.276775156178104	0.203191492021439	0.610465116279062	0.545334317543805	0.484304011956374	0.513675547283163	0.120782781485013	0.308919496983938	0.499782136068055	0.56664475116586	0.330039207021316	0.460312830998003	0.685838554448523	0.0882900678248179	0.368313857907326	0.381784064665127	0.521718415666546	0.555555555555556	1.25553410072537e-12	0.511310345521599	0.406294253513534	0.500456630687323	0.47244481894707	0.526191111638734	0.204863700812061	0.443347609681725	0.364767137086963	0.476758598784906	0.177879112355504	0.5110260084725	0.389534883720939	0.391049367400913	0.425856175798969	0.37926976776751	0.544606845556029	0.199412254854645	0.109982622033067	0.452837499918471	0.512676663089527	0.391304455320171	0.401768795392035	0.397639416182344	0.408273562654158	1
2010-11-08	0.173342805869899	0.287372642367789	0.205939574438314	0.488372093023249	0.577119469701634	0.446584790095236	0.562071724036064	0.106092919404521	0.297739127483792	0.513251986426709	0.569541441132751	0.338252663356529	0.450616465688944	0.771622649978293	0.0934153022938286	0.399409805623558	0.428004626065635	0.540908480703404	0.555555555555556	1.25827766994717e-12	0.56266813004338	0.403277857885862	0.508911632700369	0.480125671666282	0.523667150671288	0.200870521282756	0.444877021130705	0.494944522919855	0.466830709355362	0.169270357452312	0.592606601008975	0.511627906976751	0.435066068166898	0.429208695791795	0.461056263144997	0.547142019789072	0.197991909644569	0.101384088556388	0.464035753611898	0.549894879328442	0.394317648862578	0.402399618309518	0.400182150507358	0.41013645540339	0
2010-11-09	0.167095698761038	0.279704997153363	0.203447613809923	0.685483870967737	0.479973776635059	0.409774653874273	0.394378869399727	0.08662890539503	0.261547941606155	0.467579355700721	0.556723371367449	0.327245102670329	0.441205549956602	0.682938449657691	0.096582909911896	0.373098396574894	0.419094638325778	0.540700553338441	0.555555555555556	1.25968297076933e-12	0.552888453123357	0.414379703217461	0.513607096049356	0.487265813704489	0.518798067235482	0.202304068517949	0.43816938980326	0.441676211083173	0.442318171881462	0.185276685682811	0.480148511599126	0.314516129032263	0.393240105834449	0.416385451907655	0.394938880241579	0.538830442699302	0.192395907383662	0.106127417059178	0.39934776641216	0.418844173487104	0.394264785817974	0.402372191226149	0.397497335958242	0.409172299330185	0
2010-11-10	0.162597781642658	0.253067013714429	0.200936847771174	0.9767441860465	0.394987937161329	0.300359000350051	0.221979759411332	0.0894882305273754	0.217062328524269	0.424025177587425	0.552239776585215	0.310575478205851	0.424453227923104	0.683878545265442	0.0972337501904135	0.324023377902346	0.368419083055343	0.510854895389291	0.555555555555556	1.25949368330271e-12	0.494578312128221	0.43668598016985	0.517450450874093	0.493792736264933	0.509333141300195	0.19821586253979	0.433004184467564	0.487888703052322	0.446694795415077	0.179324091668725	0.247545583919795	0.0232558139535003	0.260191833107261	0.359936347303303	0.20346409377611	0.521527018560122	0.186491425425035	0.0992675277509878	0.343447195539801	0.410268798443822	0.389401385714441	0.401192826641289	0.391059327350918	0.405742755900135	1
2010-11-11	0.164097087348785	0.231972558257221	0.203924453842682	0.725190839694644	0.447688407571085	0.389648910222603	0.336497562321406	0.0940196877010339	0.218646062088499	0.450617480681448	0.566845678022734	0.329587222129318	0.410234270882958	0.76506420816048	0.0991708134335554	0.369039231667406	0.399604040144841	0.49730546094175	0.555555555555556	1.23694688296308e-12	0.530509394310053	0.446053609315535	0.522907292603932	0.500171149900676	0.499357136187606	0.193015481757626	0.442176601184227	0.519955071707472	0.486249965603695	0.181803652551199	0.323484492989352	0.274809160305357	0.262320432333503	0.323069952972741	0.25198194263611	0.513426566247518	0.188448227212997	0.117252643500173	0.396403862972335	0.571112564480614	0.386863959573467	0.400287732890117	0.389538323525753	0.40451102240356	0
2010-11-12	0.179090144410054	0.226838966630851	0.201215657308119	0.973451327433627	0.289765914207841	0.270628017477736	0.0772933583052969	0.130831173118947	0.188173389885087	0.349474486392184	0.528157192997787	0.311167122078602	0.389155603702364	0.68876987806762	0.0950291072009626	0.27325726433177	0.335563503264619	0.447402718876176	0.555555555555556	1.26041354037588e-12	0.453221467848819	0.485903883272097	0.515671401380956	0.503739838532933	0.481840938323862	0.184146352522264	0.440821342334712	0.526409987667897	0.384681199933405	0.266949623170536	0.132866546995494	0.0265486725663733	0.174100991202108	0.266731436939992	0.147778666203512	0.482175203671322	0.181858382264286	0.180013535231114	0.268751220467974	0.260433060000416	0.377665789812436	0.396941628719117	0.377350926164952	0.397155431651181	1
2010-11-15	0.169844425888938	0.22544137135421	0.203149347132318	0.866666666666666	0.309801003501039	0.383361594140092	0.192509339770594	0.163707757345082	0.214498456746265	0.367504256822915	0.553109308546127	0.30502133950312	0.371743179522712	0.631743052642435	0.0919350196280501	0.275779867580838	0.33055163516095	0.392098949666039	0.555555555555556	1.26018672043829e-12	0.448193046187697	0.512768556229103	0.505173858007279	0.50436926187943	0.461485638433464	0.173969642475161	0.417106876652568	0.489784124421457	0.407798353328	0.269182486261969	0.184406633423953	0.133333333333334	0.153844377770632	0.221879604322263	0.16226139601421	0.459719910161785	0.186787373283029	0.180464327323135	0.318480658096397	0.53569707107215	0.367991852649973	0.393485816214642	0.37029864049291	0.391746610680459	0
2010-11-16	0.167845351614102	0.231724477156052	0.201203575484596	0.985347985347988	0.249341010175293	0.300410331935496	0.155049399423723	0.201383936881133	0.206797743032679	0.324976830590318	0.558042727976218	0.324492226286601	0.359085274855229	0.631618300916375	0.0871926241029068	0.211780816240574	0.316629779317424	0.344606494570403	0.444444444444444	1.26041127380187e-12	0.428209408951819	0.549213049275235	0.492538303754836	0.502194004840817	0.436898588451422	0.171754256654548	0.398075678814825	0.50122313985147	0.373368076111256	0.286109771831785	0.230985539391421	0.014652014652012	0.0974881386851167	0.171688909332134	0.112784379708654	0.429865648929413	0.18216757104443	0.192268971518955	0.287654456247641	0.382224861192343	0.357683558952266	0.388110107874348	0.360144500043932	0.384223481009703	1
2010-11-17	0.170094310173293	0.240836357752307	0.202694878147623	0.899305555555561	0.266885117822343	0.310919378050953	0.22043878474096	0.225772504000269	0.21378818038075	0.344618216299034	0.556212169387957	0.323758108453927	0.344821716318721	0.584863491981852	0.0825874680591373	0.225916844152521	0.313288533914978	0.332274890430081	0.444444444444444	1.26048452602746e-12	0.425096314140202	0.572889477248814	0.478311026915705	0.497437550972381	0.411898140508321	0.16532800998513	0.368295881104245	0.46371036834928	0.367357048725249	0.282850682545257	0.283933979789175	0.100694444444439	0.090984338395161	0.135886936278775	0.143190287364627	0.408649481925986	0.182312092132653	0.160439651646915	0.342187668645474	0.532234974437981	0.350652774019984	0.381939014116358	0.354268944662801	0.378576017801316	1
2010-11-18	0.170094310173294	0.241278108902633	0.204617232251362	0.767361111111115	0.331757279010008	0.37738121869931	0.303227686601031	0.240985912512825	0.242405429598485	0.385639322963288	0.573518460802869	0.3407351447802	0.334938024724943	0.636977948206996	0.0798279245902453	0.250604140517145	0.329437886693467	0.310863743332833	0.555555555555556	1.25994648447094e-12	0.446149117592522	0.578200003225646	0.46834185644064	0.491518877807139	0.390588584759412	0.16343986450809	0.358185016461454	0.514501302809458	0.415358742504589	0.295507621474595	0.351944884318407	0.232638888888885	0.13428917002853	0.127609636607051	0.23758497183553	0.400316121628278	0.185292795797017	0.164082895346242	0.417631673566163	0.590973268077055	0.343992030399927	0.377166701610178	0.353748619764498	0.375885099960758	0
2010-11-19	0.177340954419573	0.247830537796751	0.202713888742916	0.826388888888895	0.312636255885529	0.402142977608812	0.302605972231457	0.261909524782592	0.270254820920416	0.376644401113838	0.558873439495493	0.336549811265265	0.318399789873982	0.570815920365333	0.0778276255055232	0.227034160949268	0.298252929603968	0.347688057151052	0.444444444444444	1.26024622961669e-12	0.409731980385863	0.585253328308582	0.453793982397892	0.483699722953185	0.371938510623078	0.161751552852561	0.349782160754165	0.434551689474602	0.394025153241476	0.292279577657789	0.358018822169663	0.173611111111105	0.141846113721299	0.124812101110038	0.255685805488487	0.391034073602662	0.18701434476979	0.186764159572731	0.427274042565494	0.475183110231767	0.343040495597062	0.371900701603359	0.351882154804708	0.372820137912505	0
2010-11-22	0.175091995860383	0.253914936055573	0.20116006252008	0.94097222222223	0.276799090649795	0.348121184322292	0.284624825152352	0.284059159608608	0.276823951375409	0.356022705373171	0.561840254639003	0.325541855264443	0.305643761914503	0.503384276004885	0.0799322532393846	0.23381603038545	0.287115444929147	0.375305196370874	0.333333333333333	1.26043977438522e-12	0.394355317650679	0.59824609229256	0.438456046005276	0.474192685890127	0.354235943825214	0.159909191887862	0.331359297635272	0.390382334166006	0.3661223486569	0.29279031112094	0.355904633180361	0.0590277777777702	0.105511890649455	0.109865965950778	0.202830728301779	0.377740288273606	0.18549649633098	0.168848317515376	0.39178027215471	0.440518556972502	0.339710123787033	0.365153639094622	0.347688068601493	0.368636620167839	0
2010-11-23	0.163847203064431	0.267641534974707	0.199712230580197	0.904458598726118	0.263067053922503	0.388048050843484	0.294019292394034	0.30582502090904	0.289985407091793	0.35294985684436	0.555368297657805	0.326740263379746	0.292067066421967	0.405646524650839	0.0844793723439052	0.256808998796072	0.279319205656773	0.418505075970261	0.333333333333333	1.2606684323171e-12	0.384335186576273	0.609756497894755	0.42151607633705	0.4629957046245	0.337654168001303	0.15841813201834	0.312885148165934	0.323956771885753	0.333250179517202	0.275943548769023	0.352748671069337	0.0955414012738824	0.0944729159005613	0.0959276045579807	0.198082001403703	0.365507555339623	0.186806041128222	0.1579517061391	0.390971163554358	0.482690792488861	0.338917178117979	0.359393951587164	0.34372997807237	0.364553569897847	1
2010-11-24	0.16609616162362	0.271463874132432	0.201111631139027	0.837579617834399	0.30322966643546	0.41890255184432	0.335297946682296	0.318953082824572	0.306522010581177	0.379863148778528	0.574054472654793	0.333882326976936	0.279400241455212	0.371777915872168	0.0897658324978238	0.251998848020266	0.279319205656773	0.449618641869975	0.444444444444444	1.26054655522751e-12	0.386407127147185	0.609797231253767	0.407461031485371	0.451058385349298	0.32437251239079	0.157187853722867	0.296442727115904	0.380569381048707	0.355699850059004	0.285171261907957	0.379985537505563	0.162420382165602	0.1112613486879	0.0926795650061047	0.234724014127683	0.3613992920895	0.188433420170475	0.164641304389119	0.42018005489322	0.556095291417893	0.338705725939564	0.355636441165632	0.342968381381152	0.362279324282723	1
2010-11-25	0.169094773035874	0.265651965921914	0.202794868441553	0.777070063694275	0.338836377422305	0.414792796919055	0.368344639652222	0.323400502988884	0.322696084250114	0.405311139397495	0.574094752957998	0.33838051728776	0.273173872563102	0.353534197460078	0.100831749286118	0.349234840462014	0.317186653551164	0.474407040190124	0.444444444444444	1.26043977438522e-12	0.430649632426347	0.601770210297436	0.398905415252777	0.439694699870548	0.315454552890476	0.157160710897062	0.294791346048619	0.440333697143266	0.368187208760354	0.290963435724218	0.407905512170903	0.222929936305726	0.144301600853048	0.102409415545813	0.287434348641466	0.363392107915535	0.190014442375679	0.161140873169121	0.444233174748144	0.551242644974056	0.337489875913681	0.351549805743674	0.344159006264898	0.361383444808046	0
2010-11-26	0.165096624486202	0.260255194012145	0.201752985314917	0.849829351535843	0.305729373184932	0.422457676403396	0.350339108663996	0.330062005036541	0.316841480751193	0.388680677376944	0.563187805203895	0.333380028065587	0.268035780182222	0.261786208029487	0.10920094161993	0.321486035927498	0.331665383628431	0.470874302557045	0.444444444444444	1.26060887190095e-12	0.445709706742478	0.601325469452751	0.391389749262552	0.429010395671581	0.308536063516311	0.155210197307244	0.268489963257981	0.331357990547791	0.337845576499018	0.284600797157462	0.39746684491407	0.150170648464157	0.140057505396674	0.107368015791527	0.273191931720464	0.360654464948982	0.187995079210898	0.0969552306938702	0.418188967010422	0.455337015249233	0.335798258486365	0.350178451575231	0.342628690066771	0.359330108280051	1
2010-11-29	0.160598707367822	0.260208262532821	0.202634911091895	0.804979253112036	0.311783316881654	0.431828228107336	0.364891217942888	0.333892873733403	0.316477717996227	0.399604491156032	0.559061143175265	0.330782605445991	0.25772391422337	0.285889041379813	0.12000488167019	0.368509384407935	0.316072905083683	0.487184616038689	0.444444444444444	1.26049251751335e-12	0.427711572671845	0.597861839215019	0.382488535281954	0.418575853939012	0.303870524192643	0.148941533596579	0.240038497710965	0.32056732299251	0.369087190053272	0.281020308477929	0.390860533438066	0.195020746887964	0.153421969602724	0.115485247418106	0.289480320386452	0.360359992268612	0.188473693315609	0.111015344767658	0.429659423136499	0.517252019614693	0.33600971066478	0.348560253656469	0.341876640743477	0.357802453077452	0
2010-11-30	0.162098013073948	0.268288528546657	0.20139263041418	0.915322580645163	0.269636352492356	0.40166261382587	0.340758158990881	0.338340212567691	0.309517445206725	0.378570080486977	0.552971745624624	0.329551324028597	0.261934295479926	0.307636942362231	0.12671214193447	0.335883288795574	0.36730533458786	0.486904738299053	0.444444444444444	1.26043692854846e-12	0.487432272324866	0.603076439697976	0.373835657592768	0.408393770617469	0.299239729933552	0.143209447353829	0.233368438828055	0.373088083964345	0.378134155591569	0.275829910526682	0.342261420852834	0.0846774193548374	0.122490350276385	0.10976067866629	0.236061033249736	0.354285691761018	0.187423747330245	0.121083583511185	0.388138413839891	0.43915099878576	0.335163901951122	0.347710014072035	0.338425498297925	0.354876731842866	1
2010-12-01	0.154101715974605	0.275791632702361	0.202070745264717	0.853080568720383	0.291493788956817	0.354039904410644	0.362590231455745	0.33050661840265	0.311322858124936	0.399399756129924	0.562885624736514	0.329917475002513	0.264039486108204	0.188119520406332	0.134376652787802	0.315925535813503	0.366191586120377	0.481217381085475	0.444444444444444	1.26057542608972e-12	0.486425476055024	0.601694277105482	0.366939317070488	0.398786047996818	0.29598771107288	0.13106916477948	0.201942840897022	0.250943583887615	0.36561445060736	0.267479903555989	0.329754077752788	0.146919431279617	0.124342766568477	0.106611209700491	0.243463058999352	0.352922122390393	0.18827299549014	0.104810380681007	0.404335455516908	0.532684170098646	0.333736599746824	0.346859774487601	0.337018608252412	0.352990784627711	1
2010-12-02	0.129113287539156	0.271186911431716	0.202961725200613	0.710526315789471	0.296052488829358	0.337331658361209	0.372854618927157	0.312693387604629	0.30091643374013	0.412213796639587	0.575156418060242	0.333705024154116	0.272808140292936	0.260534152245194	0.139700768591538	0.329575175611194	0.401274662846065	0.475915461610499	0.444444444444444	1.25973970145349e-12	0.530847917105629	0.597814290208309	0.359537079649417	0.389530561463578	0.294369741328746	0.124477536569618	0.186871863995087	0.309090588462836	0.444520044598498	0.173374039679927	0.390252575359763	0.289473684210529	0.177049254043562	0.123487046914066	0.325917467179001	0.353589845497454	0.186323286922632	0.10454583681672	0.413384194195052	0.515161801759083	0.331410625784264	0.345022159901888	0.336259455872375	0.35154930184703	1
2010-12-03	0.125864791842548	0.267875892655731	0.203651856117033	0.651785714285706	0.310437196658679	0.354931601593778	0.387918283666006	0.286130379509353	0.29941317920559	0.428858915152419	0.562414898575973	0.33347124308691	0.281915765850018	0.283055391394308	0.146544350744387	0.358572035565352	0.399047165911101	0.480798010996538	0.555555555555556	1.25990521301254e-12	0.528043852648873	0.590912342726845	0.354995200607603	0.381163272954859	0.294708377403113	0.118909821519546	0.164429025643254	0.321886024907128	0.440684612404553	0.171700353174314	0.383011701032487	0.348214285714295	0.233396166735043	0.155023720596487	0.397825870954019	0.356731801585981	0.186697815481971	0.0807824167256648	0.431631912786148	0.523843635708791	0.330776269249021	0.343815368233658	0.336289677236597	0.350674601667086	1
2010-12-06	0.119117916164977	0.253410774423358	0.204609754957138	0.486238532110111	0.351326106899269	0.372260152500165	0.418492168923972	0.235222688623922	0.303574919907644	0.45665729216482	0.573060107891124	0.334755296807406	0.285751494537135	0.361291619720561	0.153144352052886	0.381635807209294	0.387352807002537	0.480311615551626	0.666666666666667	1.27424087724564e-12	0.513506071056888	0.578542124582629	0.350857243436237	0.373592176163235	0.297793001242496	0.112374166672132	0.161863283184865	0.372299237162521	0.493096292606812	0.137640507126954	0.471334191536163	0.51376146788989	0.330734291433541	0.211092014176733	0.520133421263427	0.364194183014995	0.187381820852776	0.101990096745337	0.455631811950689	0.547468045001529	0.330881995338228	0.343979930733872	0.337829406506998	0.350822239880381	0
2010-12-07	0.115369651899661	0.242947620792643	0.203732641136133	0.495412844036695	0.349534000086828	0.451987680538008	0.425730226468584	0.185340747528539	0.312758973608611	0.464908560731149	0.56165131079322	0.334311005679631	0.292352515998683	0.376689721724027	0.160462246860519	0.364700721190528	0.396262794742396	0.492681339560917	0.666666666666667	1.24151309253217e-12	0.524692113255693	0.567815943076683	0.346492125067261	0.366609873524819	0.302787674988442	0.106478636458651	0.156603009709163	0.400184105498705	0.485489407506156	0.136313111362125	0.448602576005786	0.504587155963306	0.392313839277112	0.270640854700572	0.568532279872114	0.371068615019934	0.188600852143508	0.109979977673373	0.453897185214939	0.508658042986263	0.332679338854752	0.344473618234511	0.33876650552878	0.350892252311764	0
2010-12-08	0.110871734781279	0.233231835278405	0.202972709275938	0.701923076923079	0.306946931133382	0.508412818906992	0.379271642337348	0.1514973496524	0.307849452155972	0.449243556952295	0.564165563481836	0.33125432720295	0.301763431731026	0.275459460412544	0.16431891577904	0.33243279008968	0.401274662846065	0.499302333167615	0.555555555555556	1.26015593874133e-12	0.530829518692727	0.565430643762482	0.339026351783293	0.359441253081711	0.307559576713458	0.100086639551418	0.146556711527711	0.337909257068123	0.442810416757396	0.119602235457925	0.40128397243256	0.298076923076922	0.358802975874666	0.298275441182373	0.469937363381256	0.372391081959709	0.187107647229107	0.101458519069782	0.415813695611666	0.45888512761835	0.332679338854752	0.343733086983552	0.337245946406316	0.349730755920445	0
2010-12-09	0.102375669113227	0.233672475854665	0.201916482720097	0.968085106382991	0.261973737274386	0.442356669630548	0.262627936389746	0.0907932493673299	0.29106277491905	0.432267471818668	0.556571533309655	0.32871343832606	0.313020849412748	0.295729913608319	0.166271663144758	0.330307428735294	0.392921549339948	0.502729515568347	0.444444444444444	1.26027522688297e-12	0.51962489908242	0.570535756397412	0.331316670358825	0.352071868745335	0.31052211050455	0.0930355024180152	0.15854311997089	0.391071003329344	0.434564207528803	0.125701359750376	0.256806518184856	0.0319148936170094	0.240360248725352	0.274056537936866	0.268151495509934	0.368416725451631	0.184439275629221	0.0922952554721378	0.381062073997897	0.449160265665461	0.331093447516643	0.341703482814257	0.333729399887077	0.347358531519842	1
2010-12-10	0.0991271734166189	0.237628308606989	0.202788303842275	0.764705882352929	0.297770645733137	0.566144318711754	0.310628938027576	0.0732785059753773	0.29523425350273	0.449283577836928	0.561207985589754	0.331331783937401	0.321958989283655	0.313350701403916	0.171251226002296	0.338005819538107	0.38846655547002	0.500008247368516	0.555555555555556	1.25892140393006e-12	0.514102580994897	0.568674486127508	0.324854600066114	0.344806372602247	0.313459204791215	0.0863290185610948	0.158499028118693	0.392797975896063	0.466224425778321	0.118243576999775	0.282307015747105	0.235294117647072	0.234831823995434	0.255920249153966	0.279198995979254	0.369283545924103	0.186129027018217	0.101475806437693	0.404563383601625	0.539569408237465	0.329877597490759	0.340743534896347	0.332547068601231	0.346077792761887	1
2010-12-13	0.0973779834261385	0.226642782621109	0.204022594219472	0.490196078431355	0.37013616932702	0.537303029831013	0.451862747483953	0.0617554196916337	0.315274551308797	0.480566355147835	0.574270314287265	0.33701033107911	0.330495715687306	0.412815032928867	0.185155222320167	0.384913300620791	0.393478423573691	0.496538246693338	0.555555555555556	1.26966108358654e-12	0.521007490626006	0.557063553445792	0.319271438020396	0.337810319611443	0.318449219129885	0.0837756304921852	0.183929340091968	0.458366267164865	0.495070774303143	0.128929094597854	0.424972803397566	0.509803921568646	0.330262459482581	0.278186496771756	0.438467214972763	0.37728486478694	0.189125677729215	0.111203052561027	0.445039817977922	0.571906020050715	0.329243240955516	0.340469264062659	0.334261688181595	0.346451824767631	0
2010-12-14	0.0893816863267949	0.215896920014523	0.202978574321177	0.568627450980387	0.354826704144632	0.601225452671517	0.417216830325744	0.0593135337518962	0.318529730006092	0.473380487333939	0.568172106933602	0.335267322554624	0.342671924194082	0.39653437720076	0.197480368397883	0.370854062498301	0.403502159781029	0.483374154538815	0.555555555555556	1.25736987937208e-12	0.533747676452707	0.549397683416656	0.316354158919367	0.331595000608947	0.324274984361862	0.0804834886868486	0.194168232036179	0.437457788310319	0.474835628081188	0.122990411254095	0.461165950423237	0.431372549019614	0.365563954005317	0.305739968579213	0.474136176628446	0.382895068039092	0.188292469942269	0.0797458436795414	0.438106583257306	0.493462820270259	0.328238843108047	0.340880670313192	0.334689670633953	0.346351591190907	1
2010-12-15	0.0836343477866418	0.197691419468848	0.204214943624407	0.409638554216873	0.368137886317599	0.574821801458297	0.448052779134717	0.0580348957473982	0.310610499709271	0.47941362599618	0.56848872310531	0.332754673531602	0.352189883517693	0.374044488389563	0.207689394200146	0.373168794163699	0.40461590824851	0.485879011187426	0.555555555555556	1.25919589787552e-12	0.535217992620838	0.540841102400418	0.316770439796856	0.32671099887086	0.330971693249838	0.0795527704798771	0.21676375374222	0.43501663245003	0.465241150974151	0.117150394507215	0.532013100652624	0.590361445783129	0.446503823771765	0.353249065390305	0.574772125018862	0.389424711414335	0.186788576625868	0.0935073272217505	0.449082752364364	0.52165203295107	0.328767473554083	0.341154941146881	0.335421928061286	0.346523494252886	0
2010-12-16	0.0833844635022882	0.184571227672378	0.203245475307739	0.551282051282043	0.339271823832588	0.486695293419597	0.371153917308117	0.0454831513342739	0.294577095863693	0.469042570984063	0.562508159193785	0.332292452982203	0.361877328527479	0.376913147718842	0.210759591334362	0.357739827666964	0.415196518689591	0.499269325685463	0.444444444444444	1.25818007031298e-12	0.548980058949002	0.537508704680197	0.314700103889049	0.322364876729521	0.337227609720023	0.076073947026171	0.219404256901551	0.472086464231263	0.473176424787619	0.110709082919997	0.46818633896871	0.448717948717959	0.449321036962017	0.385936054691862	0.540927120482036	0.392417168010484	0.18452080617447	0.102209736732355	0.429147605063049	0.480334845289345	0.33003618662457	0.340990378646667	0.334658679460711	0.345953187627016	0
2010-12-17	0.0786366620995526	0.178859665763126	0.202484950749671	0.679487179487164	0.318989791812851	0.438206245938499	0.311193173961352	0.0402621574060234	0.284559896619219	0.462288140292539	0.559086143532737	0.331071726477667	0.371439889347452	0.381509949199568	0.213152306075891	0.337282695100403	0.40405903401477	0.505194129413825	0.333333333333333	1.25931073051357e-12	0.534336751774059	0.536900051962535	0.319061878936724	0.319812695422047	0.342503449497512	0.0719017099943508	0.20899620070156	0.460164333090365	0.464066086166975	0.111338931486079	0.360417537411487	0.320512820512837	0.404908621848361	0.391737944358182	0.44735201922353	0.393468839789425	0.183636383398512	0.110645198286964	0.410730793578706	0.48886315509863	0.330089049669174	0.340386982812553	0.333255975475472	0.344978748410889	0
2010-12-20	0.0746385135498817	0.185863995900413	0.201358783251337	0.842696629213465	0.276532861478349	0.443734574887959	0.204371391662009	0.0474418508996378	0.27604371132211	0.442901986383598	0.556135377114787	0.33007978736286	0.372706571844128	0.386099706798972	0.209251044433398	0.32126031207212	0.390694052404984	0.496007006996342	0.222222222222222	1.25851407139367e-12	0.516573747086236	0.541988117041201	0.321233549802499	0.318231354604895	0.345707284825754	0.0703404009464423	0.226941440123922	0.467996849419361	0.471282206482339	0.102482959530515	0.264968053388969	0.157303370786535	0.316370905382917	0.36373036493922	0.308432731058092	0.390309195909226	0.182481966014838	0.131943603981367	0.382990776260353	0.462004896316138	0.327498760483596	0.338713930727053	0.330354321998631	0.343064265612418	1
2010-12-21	0.0826348106492244	0.179867231407539	0.202707578075381	0.348314606741559	0.400590826134326	0.468664923941845	0.486612452233327	0.0480913142553026	0.291026206826088	0.487019993189593	0.573964841941355	0.336007821083028	0.376667184721057	0.470571070518322	0.210803613981364	0.373177131462661	0.411855273287144	0.50147462801764	0.333333333333333	1.26859162351696e-12	0.544587085589998	0.53116985715659	0.328965557814995	0.318605503272587	0.350695390452682	0.0699788333314763	0.257823825048067	0.591161217623045	0.495852607047809	0.133528670062383	0.428617629133145	0.651685393258443	0.435850471689887	0.388073890900862	0.512090186685643	0.398518064908478	0.185132239237056	0.162901359296716	0.450114977496605	0.60767530789241	0.327657349617407	0.338275097393151	0.332352921320768	0.343732299293313	0
2010-12-22	0.0856334220614778	0.174298807235585	0.201709627294038	0.730337078651674	0.334026153377381	0.392195482247919	0.283869615724528	0.0485759543832267	0.285415293633419	0.455465147864959	0.568832408731617	0.335197257581678	0.373268550698287	0.396663443802058	0.209268674347851	0.368560775304298	0.383454687366351	0.489979936037869	0.333333333333333	1.25780867963407e-12	0.507406802587801	0.532412002545484	0.333702747360583	0.319909128215499	0.354483632223905	0.0685132086780758	0.260582014552771	0.501149418555468	0.470726864083762	0.14842396669067	0.392550808261744	0.269662921348327	0.37756805769028	0.383319970051534	0.40417579388266	0.398262327560593	0.182802185956201	0.184090473102504	0.406846436750055	0.436203716549003	0.325754280011677	0.337561993225562	0.33064615748035	0.34255226831118	1
2010-12-24	0.0918805291703401	0.171424111975067	0.202967317940651	0.494382022471906	0.386932013399643	0.378240184122655	0.426047075288652	0.0406411535280307	0.290949159238455	0.479164145839709	0.56378533860999	0.332281109689613	0.371832382515436	0.473309407201756	0.204663700175714	0.374804910779884	0.395705920508653	0.48373730970824	0.444444444444444	1.25209887915933e-12	0.523588317452116	0.525893304146654	0.337148246198163	0.321682489797434	0.358996381226835	0.0669596104322785	0.281347975307754	0.577446484119911	0.481517559278571	0.15430740846906	0.4270180869568	0.505617977528095	0.423908545091206	0.396834274027808	0.478263659621225	0.403577132190207	0.183788075205119	0.205819278197362	0.442187904872698	0.557082240957433	0.325701416967073	0.338192816143045	0.331385445248267	0.342653220295215	0
2010-12-27	0.100126710554038	0.160491473680012	0.201610591980381	0.904761904761889	0.31929353921498	0.358098972357844	0.171121389272203	0.038918494602922	0.276253305812714	0.444896462724536	0.565685691811436	0.330840673195774	0.37290281842812	0.38860703282902	0.187763854189462	0.324762518684785	0.38846655547002	0.476392109539401	0.333333333333333	1.25976447200957e-12	0.513539927802712	0.531338349630556	0.339237775472806	0.323544168896047	0.361443659974509	0.068109047908138	0.305305249363595	0.537937573629494	0.443613322120077	0.164101887544303	0.36170427411369	0.0952380952381111	0.306627838592861	0.363620201849651	0.289568854686716	0.400293309890137	0.180625163398254	0.265447782086518	0.395867696358002	0.428814691459912	0.324221251718172	0.337452284892086	0.328570978896248	0.340856865968073	0
2010-12-28	0.0966283305730757	0.153926533161225	0.200443277605772	1	0.299203537638535	0.290787375867707	0.149048208623497	0.0467320027910116	0.255663609813305	0.436536679126231	0.556779140355055	0.327261899568141	0.375561067611284	0.381289473942869	0.169682345889377	0.321448667177631	0.397376543209877	0.48411074738469	0.222222222222222	1.25994416685357e-12	0.525101853259061	0.538043860936819	0.342312049476678	0.325685272427497	0.361919625463185	0.0691509529930132	0.313076696124323	0.528178312208477	0.435640144688631	0.16454589850376	0.245527259945171	0	0.194053429834357	0.300948248569274	0.145501812502927	0.395824830600219	0.177457702264319	0.231531363478949	0.387608424079615	0.483760052639724	0.323269716915306	0.335614670306373	0.325622022093076	0.338777731873732	0
2010-12-29	0.0988772891322662	0.163628006353463	0.199402264888754	0.858333333333331	0.269843904131347	0.303157572191927	0.155233708343029	0.0682970248279631	0.250402897383953	0.421308462423856	0.551387364631397	0.330047463529178	0.373821609253173	0.374685549999539	0.155896037736572	0.303910061176979	0.380113441963903	0.462807510223027	0.222222222222222	1.25985322991889e-12	0.501790900458512	0.547479106183983	0.344877108067164	0.327941959491532	0.360192653446246	0.0684161580032519	0.312043618644416	0.532707569763167	0.439104351438768	0.162673479747375	0.187608021380196	0.14166666666667	0.170154889746098	0.250562951552627	0.159543092761858	0.389098147055386	0.177160360516023	0.259842681161732	0.369128132095389	0.469809920156421	0.319040673347016	0.333502784886972	0.322047082038221	0.336162537692888	0
2010-12-30	0.0988772891322662	0.176188511540148	0.198618682387808	0.875968992248062	0.253874966865485	0.292159907470156	0.192981567328509	0.0900623507896075	0.254813030920262	0.415126046525969	0.559051581471636	0.330593935535578	0.367514957667612	0.383506963386471	0.148220859172097	0.306419251416176	0.358952221081743	0.457364591879554	0.111111111111111	1.25945262690761e-12	0.473686829549565	0.556373741263228	0.345553911112619	0.32989079450655	0.356802175951557	0.0688012024029354	0.294950030181635	0.436577494309443	0.45137347760474	0.156360146964637	0.226052842134623	0.124031007751938	0.147854886755223	0.20894426687549	0.166150743249917	0.38243938039585	0.177380314304465	0.245556063517001	0.376194774403667	0.487802825454767	0.316080342849213	0.330979493217038	0.318769917083462	0.333515008659057	1
2010-12-31	0.0988772891322662	0.182826681476595	0.199677536084448	0.782945736434105	0.289680046178273	0.354093285350017	0.275185353629149	0.10085586794435	0.268401236486468	0.430878289736155	0.568319104903998	0.333378068815271	0.364009280053574	0.451675215144645	0.14267570393888	0.323205352853645	0.370089705756565	0.440403837553966	0.222222222222222	1.25949574181954e-12	0.488697898598604	0.557796273516389	0.345796826468561	0.331501361693179	0.353688705633377	0.0694140808654534	0.30055850284847	0.513841720846301	0.45098894612202	0.15613122930269	0.309731469284335	0.217054263565896	0.166575785208671	0.187938408187212	0.227931581349653	0.380906086219318	0.178611667474827	0.231904308869736	0.405866396943726	0.538384385740784	0.312644244949977	0.329169305714694	0.317657786348783	0.331958238185328	1
2011-01-04	0.102625553397583	0.16897021713575	0.201254843015524	0.604651162790688	0.354810217324096	0.384111526781178	0.370580833053384	0.103477178123623	0.28751040244195	0.457108720502638	0.573939740742827	0.337283967721034	0.362376865286732	0.462315695238922	0.142064928932936	0.358252598205017	0.380113441963905	0.446304226766497	0.333333333333333	1.25968871757011e-12	0.502521118951359	0.550116329282378	0.348693837445389	0.333403995116626	0.352788260183203	0.0726530091496469	0.340174590770849	0.521814359272595	0.448079637703449	0.152989833021739	0.388826870421318	0.395348837209313	0.243432554479533	0.201604612911986	0.361335477547473	0.385967841328545	0.180307500536322	0.280553640334074	0.452447860996973	0.563018886708199	0.312379929726959	0.328264211963522	0.318972270504164	0.331852513707958	0
2011-01-05	0.103874974819355	0.156103500247822	0.200211060785384	0.674418604651167	0.336736537072341	0.330303069998669	0.348243826615548	0.100423303583588	0.28470613638688	0.451957864870559	0.568624273268422	0.335327180693491	0.360414399446812	0.460838566429399	0.138421822114563	0.317689197029307	0.382897813132608	0.450424963043744	0.333333333333333	1.25971112306988e-12	0.505908357745567	0.545870802631214	0.350713442709511	0.335354267476066	0.352965620133808	0.072966554755626	0.337280032633089	0.483342027329713	0.447122931375369	0.153141552779157	0.412283335611471	0.325581395348833	0.269479725324578	0.220092964751093	0.38987051507315	0.388875237513844	0.177990195613347	0.217033514202801	0.442088787610945	0.490471369794111	0.312274203637752	0.327715670296145	0.319044108848048	0.331308969629192	0
2011-01-06	0.106123933378546	0.154644948918275	0.19930323933325	0.754098360655728	0.31275368481428	0.289804892450956	0.317802985789183	0.0996145014978789	0.279865459476993	0.444244055073275	0.55846028738672	0.331150519744803	0.359022832760323	0.383279675564859	0.13874144299878	0.333879367468787	0.381784064665127	0.472162610231665	0.222222222222222	1.26004815545035e-12	0.504114128408248	0.545189840166225	0.353723171472902	0.337552561727824	0.353250959149682	0.0730786630783939	0.326585508127164	0.43496226496074	0.434879286984919	0.152638775204785	0.386013082395403	0.245901639344272	0.258074827499288	0.22831252108162	0.357741924200162	0.389361683381778	0.176953000915126	0.177469942054937	0.427010047383861	0.483493811290926	0.312485655816166	0.325631211960112	0.318019355175479	0.330254862101704	1
2011-01-07	0.12586479184255	0.149237844298571	0.202689943335631	0.29133858267718	0.466318970166435	0.383222138607131	0.544427133312316	0.0957623936598361	0.297783780887024	0.506379301700062	0.580505760334042	0.349974062243863	0.362162778104195	0.532428230921562	0.135263773613007	0.364651358716739	0.427447751831892	0.505741297123544	0.333333333333333	1.16886440980837e-12	0.565298558175516	0.524627429211216	0.359228710616147	0.340478396792618	0.358007430361142	0.082668560062657	0.464916899467361	0.679440479408612	0.488744940185433	0.199445787148618	0.539723168602624	0.708661417322821	0.417558544613112	0.291209836269233	0.592998740386131	0.40441267428727	0.179846050409307	0.264293481502679	0.503511882592438	0.645103139258604	0.316397521116835	0.326124899460752	0.322699415569564	0.332439358712609	0
2011-01-10	0.133361320373184	0.144216961437416	0.201099311163837	0.62992125984253	0.379577715829268	0.381546107444482	0.38584696333615	0.0959328489811792	0.289141699653872	0.463302840741113	0.561929234961921	0.344882645315098	0.358050520139635	0.506482566943785	0.136156024137503	0.359810095407226	0.37899969349642	0.527163812929115	0.222222222222222	1.25766950471712e-12	0.500955389670517	0.521873036478194	0.36185615156904	0.343376094431563	0.362504963195624	0.084619583801068	0.466678170553141	0.599034095223125	0.465451259209745	0.215756313175938	0.475452748661907	0.37007874015747	0.401630212464894	0.327406833310023	0.518380589927526	0.407191305258551	0.176911090752633	0.252239422299695	0.428849461899077	0.415124341193381	0.317401918964304	0.324863253625785	0.321975808017409	0.332043027894114	1
2011-01-11	0.132361783235766	0.138425200274529	0.202014470394988	0.464566929133852	0.426029709368761	0.375183214549547	0.468066566753021	0.0959607235330705	0.294702722587653	0.485700137987755	0.561819029890943	0.328592479337384	0.359299362037767	0.567368723861922	0.139136687284146	0.386268598913584	0.40962777635218	0.532708147991494	0.333333333333333	1.27568110093042e-12	0.541616200424759	0.51244081611632	0.365099680072514	0.346381895528981	0.36827617980053	0.0847778038437837	0.432308289261417	0.450857321694438	0.496286543257587	0.216241362988231	0.488096774398879	0.535433070866149	0.450715208429022	0.369209832058302	0.563774915361667	0.414920180493957	0.178182998356936	0.196403506688482	0.450893654827681	0.557883742562754	0.318300590722565	0.325192378626211	0.323370533310836	0.332785189102942	1
2011-01-12	0.125614907558195	0.138821145096387	0.203232628216492	0.299212598425194	0.469822694069635	0.373249473237753	0.553491838465294	0.092848466410437	0.31444152461344	0.508487204864757	0.57176797019444	0.336913453921319	0.359745377001385	0.563741005478779	0.145344768629156	0.418254221059366	0.40962777635218	0.544912053153194	0.444444444444444	1.2530993153969e-12	0.541658438921287	0.498311742214333	0.368311892621575	0.349467540266563	0.376163760878974	0.0847189066350406	0.420559972191715	0.467410155030612	0.479688873366356	0.201059269241682	0.571225245217225	0.700787401574808	0.543142423134705	0.430354307815153	0.670398426839052	0.426434955694998	0.181061914993683	0.198838231801241	0.473254776756519	0.557208642307063	0.320785153818936	0.326426597377809	0.326177480501316	0.334458843788673	0
2011-01-13	0.12086710615546	0.144725964276381	0.202376323303997	0.346456692913385	0.456778717818336	0.357862807408776	0.535347306021261	0.089364086173413	0.312478022061796	0.503345201565414	0.571826172971885	0.334756927648546	0.365017273871352	0.621132092634896	0.149392248103272	0.42189849165673	0.426890877598152	0.556915525152928	0.444444444444444	1.26915747433362e-12	0.564648011670621	0.48925924107559	0.371004279099929	0.352506854394354	0.384644255990667	0.0840335912446008	0.390551042661044	0.459384081441037	0.499177019320976	0.189740768812045	0.604883639533965	0.653543307086616	0.587702313682417	0.487159822555355	0.688914878613773	0.43463250024083	0.179319252998685	0.177650503894529	0.453501172663954	0.497612429584016	0.323586895182928	0.327989941129834	0.32751245567739	0.335523502800022	0
2011-01-14	0.118618147596271	0.130898382697081	0.201466817032113	0.622047244094495	0.385196611419669	0.343016040448816	0.400450748888625	0.0808212634840436	0.298410178849154	0.470300486341242	0.552334695854791	0.329673416763138	0.369441742310443	0.556780538733594	0.148599092619887	0.383236065864041	0.414082770222108	0.527936606071257	0.444444444444444	1.25868643976852e-12	0.54760776021048	0.492880894339354	0.372889546771152	0.355337991128656	0.390692062282305	0.0828402700774411	0.369056633039428	0.432572902133917	0.45938022459746	0.196759481974905	0.488284066619431	0.377952755905505	0.517902433942667	0.499900689095639	0.537489946160689	0.433557454075841	0.177010563840936	0.180008787741621	0.395678106893931	0.432766031554334	0.321366647309575	0.328867607797637	0.325273888581113	0.334617200981492	0
2011-01-17	0.116619073321434	0.13153882361	0.200296873582658	0.985915492957741	0.285838688711182	0.33340207078307	0.173074479104621	0.0871093048273351	0.276417533261306	0.412499651268664	0.533986972342972	0.323809442369747	0.370860069894749	0.565495413280343	0.142030146921698	0.315802619330681	0.390137178171244	0.50802498087052	0.333333333333333	1.25952239402668e-12	0.514298151323978	0.513975728687374	0.372829757387437	0.357590224891289	0.39076928251572	0.0835721705877502	0.367758123337196	0.460161275818572	0.44114026637463	0.219889867337237	0.287137241740324	0.0140845070422595	0.339988601567222	0.444341746339701	0.257467665488446	0.419227541668894	0.174058747415132	0.21929177653741	0.32782499869942	0.370128826724345	0.318194864633358	0.327743097379514	0.31832889384931	0.330777950617075	0
2011-01-18	0.114619999046598	0.135634934790799	0.19961312295951	0.947368421052642	0.280083658282525	0.342332798283201	0.214638256260615	0.103019663378938	0.268827226493235	0.413341111271663	0.554985550418448	0.32638579089505	0.371689657727079	0.584445387391102	0.137617306156994	0.319503681428241	0.393478423573689	0.481796798356706	0.222222222222222	1.25932030150483e-12	0.518828972126775	0.53039587147038	0.371847275674891	0.359183721251865	0.387076991995832	0.0832918820483926	0.336508154872172	0.3995415897319	0.446770515951621	0.219336316737173	0.265474884084217	0.0526315789473586	0.235297430403708	0.369611349868223	0.1432828782509	0.407570119007746	0.173765800553348	0.165469513882073	0.337392876561108	0.501361590834046	0.31370150584205	0.325878055710432	0.313341348727499	0.327433615891842	1
2011-01-19	0.112371040487407	0.135723215072969	0.200351335501941	0.832258064516135	0.317735375217346	0.384342931176601	0.298355762616761	0.114824390522734	0.278247435952172	0.432178174630693	0.566728926998095	0.333685109211932	0.372760093639763	0.642548942000069	0.138448459328922	0.341012955174168	0.395149046274911	0.445499642335443	0.333333333333333	1.2567094916593e-12	0.521396780331654	0.536957485205353	0.370231264204665	0.360115916463379	0.382535784174613	0.0818755246864843	0.314443184079457	0.42950281645307	0.471280339367078	0.220513913695384	0.315328428084939	0.167741935483865	0.207065792170865	0.309627081037599	0.160427823540733	0.402557919640582	0.175354474300444	0.176299176314041	0.378301465227917	0.546068712820645	0.30889096878312	0.324671264042203	0.311357126023575	0.325459079081817	0
2011-01-20	0.119367800449333	0.146721493647947	0.199087263551077	1	0.236245718642578	0.284812704448034	0.168579977111041	0.131618885880717	0.264925313698992	0.380702636815726	0.555391555046241	0.327547685960207	0.369102770938094	0.62537914565401	0.136377421038462	0.250977852195204	0.350599107575628	0.392360704208362	0.333333333333333	1.25949689571621e-12	0.458467857202796	0.559063291226441	0.366066779891573	0.359978782771679	0.373936160180432	0.0815662159295655	0.332902326345451	0.558334324035141	0.435779052672072	0.248716350825265	0.267316999424648	0	0.127678732219692	0.241056498224132	0.0881663369239759	0.386082350275256	0.171924465331179	0.200965201878787	0.325954074874684	0.374700137984331	0.301384416449405	0.322230253622375	0.30493924285395	0.320948948151435	1
2011-01-21	0.130862477529639	0.150342053792246	0.200098143225116	0.848958333333329	0.291847224897041	0.313229731964337	0.264328620372769	0.140656933403524	0.259995357929464	0.410234857438118	0.568601702846168	0.328625856810202	0.367497117069069	0.623363225487657	0.134776367980868	0.300423392865535	0.368419083055343	0.37965704043763	0.333333333333333	1.25910028854206e-12	0.483844584572814	0.566754293089038	0.363204478597377	0.359262254756807	0.365218689987562	0.0816134171112309	0.331225183196538	0.476110225179843	0.444911908352899	0.253829543563802	0.324621498519977	0.151041666666671	0.129290088334534	0.195922899637597	0.145625035424271	0.379377925015659	0.171331388186312	0.15643093403936	0.393554017625244	0.56641281781862	0.296943920702701	0.318774441117901	0.302716558719368	0.318426837845893	0
2011-01-24	0.123865717567714	0.153704002497667	0.19942198690611	0.90104166666666	0.277535321610798	0.285985583073574	0.26537321342826	0.149630201429938	0.260421745324264	0.40664143798868	0.55807611949583	0.334406763304731	0.366926217915638	0.557323855712581	0.132476552330854	0.276884343273575	0.369532831522824	0.386364314505775	0.333333333333333	1.25993686159955e-12	0.484930210336247	0.574184224587808	0.360780540563975	0.358175146314306	0.356496424310088	0.0794903344863649	0.307257621524056	0.350609594575413	0.42026779591679	0.246773666998987	0.329328181563272	0.0989583333333404	0.111558786865479	0.159450179279917	0.15494745125657	0.37273493423384	0.170964443529843	0.134548786260705	0.402377091845956	0.486742614467384	0.295199440230781	0.316223722364598	0.300340897711458	0.315855468346399	1
2011-01-25	0.124365486136422	0.154431517790058	0.200011877684732	0.838541666666672	0.307516521974154	0.344841006181349	0.316425781073957	0.155072839500369	0.26867567439944	0.423921430395739	0.568116707721502	0.332974914498955	0.359397485329764	0.542665757961669	0.128875530567306	0.271155314812616	0.342802868303253	0.404535392208663	0.333333333333333	1.25951733138941e-12	0.449693407884295	0.574010928104877	0.359743083612269	0.35708551390679	0.349420429913913	0.0766907500542756	0.28143362899916	0.393930070923533	0.436110129858403	0.249811201429794	0.362706636799891	0.161458333333328	0.122304565874177	0.139003746810524	0.200505620747357	0.37143287376644	0.171631379016972	0.123071267785349	0.427666949192011	0.539654798227981	0.294300768472519	0.313426159860975	0.29982976960801	0.314361010218947	1
2011-01-26	0.119117916164978	0.151405421012345	0.200473676888074	0.791666666666662	0.330189261442685	0.40810934145188	0.35277109033893	0.159752456560609	0.279213649450835	0.437031388365649	0.570329293924304	0.3339415863722	0.356881960934958	0.592189490582086	0.129288347085746	0.28249787809151	0.371760328457789	0.422725609491515	0.333333333333333	1.25880132372825e-12	0.488840470552643	0.569123244325751	0.360476374387227	0.356369269003473	0.344714045554899	0.0741150345193731	0.250161689522651	0.377433186757382	0.451787881485741	0.2510088593115	0.391150571986509	0.208333333333338	0.146393403537701	0.134045297931539	0.253439958244126	0.373672971630206	0.172294771014715	0.113938843051138	0.444589126548126	0.53227438113324	0.293084918446636	0.310299472356927	0.300293501965415	0.313595313984678	1
2011-01-27	0.102125784828873	0.154410057850984	0.201596793073667	0.721893491124266	0.34820979042418	0.448904930250552	0.379634548201667	0.165124918166773	0.297565595808926	0.446769823825985	0.56497633912606	0.334010925153891	0.35119080999919	0.510983363627729	0.13506585608828	0.314092842920247	0.363964089185412	0.472786758181264	0.444444444444444	1.26026358368533e-12	0.478655676132344	0.561475016800541	0.359135035476488	0.35551190305195	0.342553644233261	0.0744147802769283	0.278761057627803	0.310373955150613	0.413031535809171	0.2112675666082	0.401682624138128	0.278106508875734	0.187645374221826	0.145591273066002	0.319975361986988	0.378216039247122	0.174275666233425	0.140126846650685	0.460481392451447	0.527405106573496	0.295252303275384	0.307529336936673	0.301228366979751	0.313324312540384	0
2011-01-28	0.0968782148574293	0.157200077772577	0.200781769805443	0.798816568047334	0.323834676053531	0.442464214713583	0.356578241643007	0.170718971002144	0.305295354920474	0.435329044226027	0.566174441957168	0.332704809173195	0.344607629136187	0.550497754653855	0.145894547820315	0.351917064666737	0.345030365238217	0.496898889824567	0.444444444444444	1.25997252737996e-12	0.452823207605211	0.558529760602305	0.359042354232316	0.354806361439968	0.341474518127651	0.0745295651547101	0.27826826891867	0.378569157695543	0.433466459387489	0.198758201007173	0.401947489921523	0.201183431952667	0.187372353666953	0.15319029647745	0.310297839257749	0.379743560708791	0.174128230684985	0.143946919490387	0.431484392014819	0.479903360290446	0.295516618498403	0.305362597350534	0.300689577262329	0.312442411970695	1
2011-01-31	0.0926301820234019	0.159790810556915	0.201398224516843	0.733727810650884	0.354239792853963	0.444222603130824	0.390280318642605	0.174803127915446	0.316442329262712	0.449585679937971	0.565685691811435	0.332609112763601	0.337587353608837	0.536643487680794	0.160200195339095	0.364464075465084	0.354497227211815	0.512834862394795	0.555555555555556	1.26017575510458e-12	0.465974541281259	0.551185762678337	0.358411336719211	0.354108149530392	0.342234279758557	0.072914441929419	0.262591023209832	0.42144696079579	0.426661895099416	0.194251777373651	0.416096180249227	0.266272189349116	0.210691699793491	0.166651784476467	0.339564010016421	0.38462495344742	0.175522168471912	0.112463640927414	0.445084398367455	0.536968620327214	0.296891057658097	0.305170607766952	0.301313642860722	0.312279464133588	1
2011-02-01	0.0906311077485661	0.15054728934082	0.202065020965443	0.656804733727817	0.389671441272811	0.429039331345421	0.426806614029087	0.174069467540252	0.32591385980471	0.46656508683077	0.573242774165042	0.334314741164235	0.336561519192516	0.509773732346124	0.175429186599966	0.362830757790533	0.381227190431386	0.5246174702291	0.666666666666667	1.26030694914724e-12	0.502294457169042	0.540069106968385	0.360556186991845	0.354004298142245	0.345331018095135	0.0695903234838927	0.254893557195802	0.388923513499245	0.421533774684192	0.190566352483105	0.46683920982652	0.343195266272184	0.254012264888808	0.191222456561896	0.394457793039369	0.392577225348896	0.176544830793692	0.123465298949971	0.455573470804119	0.54145565746352	0.298318359862395	0.305444878600641	0.302891719653296	0.31280631529122	0
2011-02-09	0.0926301820234019	0.137785035734344	0.201333122914687	0.727272727272726	0.348881541596251	0.439066377957757	0.389006390246012	0.17249469968047	0.31848171529428	0.449751513361347	0.566556507610349	0.33248308238423	0.339442775857489	0.431360503050094	0.187830605212585	0.395559225558317	0.40461590824851	0.530529684406141	0.555555555555556	1.26039096314052e-12	0.534299277495737	0.536871801411414	0.362154222865183	0.354260007999316	0.348611787864082	0.0684516875499711	0.255451973373036	0.458771557933342	0.411425287912475	0.192320887560936	0.476637982901197	0.272727272727274	0.257449020646276	0.208840211527936	0.379956120670422	0.39518324354004	0.174807101570808	0.135152834137612	0.422550108961407	0.465905258568157	0.298265496817791	0.304786628599788	0.30224541483712	0.312272508391587	1
2011-02-10	0.0903812234642114	0.127801868491878	0.201934533895597	0.448598130841121	0.403831324847384	0.485405839761094	0.442063973481264	0.171743263202383	0.322294992103438	0.473172928734027	0.562407074308378	0.332780569134035	0.343394468435146	0.50650221830834	0.208085235308049	0.392518734294555	0.417980889858296	0.522707737881578	0.666666666666667	1.25946650870421e-12	0.553241470902597	0.52680129698517	0.365702102164659	0.355216742642186	0.353551566933674	0.06733303519077	0.245374898599564	0.418545646685425	0.451537038866299	0.191235694253797	0.54154117134899	0.55140186915888	0.360360209540442	0.257635650429531	0.521882370248854	0.402912212177588	0.1761972426796	0.108880126869998	0.449823679949018	0.558047292465408	0.298899853353035	0.306240264018337	0.30360228812938	0.312851406699989	1
2011-02-11	0.0818851577961596	0.109811639458169	0.202927175714525	0.135135135135131	0.417285270692854	0.442012478184527	0.463589651122798	0.158317929360564	0.328355480496012	0.483450295134163	0.569952801121633	0.334451278255432	0.344955520807809	0.616446437530179	0.228944021569138	0.405572804667512	0.412412147520885	0.529300928568047	0.666666666666667	1.26653318257993e-12	0.545368161344687	0.516758350600654	0.36979526606498	0.3568498999613	0.359851670790275	0.0585927225673375	0.273961520538538	0.457618642083144	0.499591618511591	0.147638618164436	0.624856364835003	0.864864864864872	0.542148607418152	0.355613724764041	0.758408859411224	0.410979721669701	0.177218912855632	0.0791135550780053	0.453284395285903	0.52250734023486	0.300485744691143	0.307200211936247	0.304953806116648	0.313578963122525	1
2011-02-14	0.0923802977390473	0.118647507438374	0.204763012412053	0.0731707317073088	0.535024135069814	0.583449706383028	0.599405583276774	0.152769890680603	0.349616335593107	0.53733633607347	0.580686351477856	0.341513649244138	0.355713401730279	0.719577535348964	0.249008509259096	0.437528626612166	0.471997690531178	0.540416506529795	0.777777777777778	1.262700106846e-12	0.629200184303583	0.492489107655433	0.375646340466287	0.359396880546631	0.370499148638001	0.0594879224608082	0.365988558018775	0.638185678970088	0.540205917363868	0.17746071330812	0.785641868940777	0.926829268292693	0.685714133427196	0.472619156533154	0.897511786670798	0.429957185030087	0.18073044079783	0.132440483675221	0.511738761795897	0.625572723778989	0.304133294768794	0.309805784856287	0.310324176032437	0.3167133600794	0
2011-02-15	0.0918805291703381	0.126852241991423	0.203351603303755	0.219512195121931	0.489241733502211	0.478925554307972	0.557568145735372	0.146943301090016	0.334967333774582	0.519943989153493	0.569749811447903	0.338824777525621	0.363322417009604	0.737105165617388	0.257484795783428	0.414265076277343	0.449165846947795	0.543110816194813	0.666666666666667	1.26397648103639e-12	0.596967221030001	0.480063943723208	0.378810923280168	0.362105371151246	0.382060585119163	0.0612996461059089	0.400708294561081	0.584963959289034	0.515741749312032	0.181411813525752	0.722175172153422	0.780487804878071	0.728585506566848	0.566057405579984	0.868649638079542	0.441015924821483	0.177184327384235	0.141170371838618	0.469095195358683	0.469953653899451	0.306142090463732	0.311588545275263	0.312295453790222	0.318363782213188	1
2011-02-16	0.0833844635022863	0.127724728205354	0.204156895803867	0.170731707317071	0.502695214288621	0.434489446036842	0.592188851515164	0.131416073513802	0.331287296146178	0.529328132697491	0.561514093148457	0.331125222492892	0.373696725063362	0.763244382704538	0.266169636763527	0.413183126841505	0.458075834687651	0.559435509428906	0.666666666666667	1.26211691176941e-12	0.609576696571075	0.468884859375556	0.382550275039938	0.365064923435882	0.394083072063226	0.0597923452491134	0.38356815099357	0.412704731903515	0.563023557477202	0.126193783292547	0.645620994736372	0.82926829268293	0.774779414504292	0.644980384355032	0.863734276158799	0.451464926982067	0.178039377930706	0.152888119741852	0.466782981774147	0.524477260761854	0.30947246227376	0.313289024444131	0.314145961912993	0.320018822417809	1
2011-02-17	0.0731392078437531	0.13924128515408	0.20527253425568	0.155737704918043	0.525421288117509	0.462908978458901	0.652211750749542	0.112381062518256	0.325176629185633	0.542187309410636	0.572362594392943	0.334362445766153	0.382822191218989	0.76679602235018	0.271495917321833	0.433132070854812	0.456962086220169	0.56962407041296	0.666666666666667	1.26217938722068e-12	0.607508504499652	0.457592071237616	0.387202008666547	0.368418754223814	0.406507029750624	0.0607391277608789	0.392875230317364	0.498833382769979	0.552296095885521	0.121058552728202	0.64361264038978	0.844262295081959	0.810989182794522	0.710632008601561	0.855324118991343	0.462250464885768	0.177580705116696	0.147665641509813	0.463071074416268	0.533465603758317	0.312274203637752	0.315071784863106	0.316273505579695	0.32188077092564	1
2011-02-18	0.0743886292655242	0.146820246619669	0.20527253425568	0.162393162393176	0.525421288117509	0.523887076592907	0.662027407725169	0.107273120598524	0.324268628577661	0.542243651395476	0.563507257769837	0.333934636090891	0.390261720812139	0.742033742178971	0.272138722475383	0.423345710656717	0.451950218116499	0.573807281387436	0.777777777777778	1.26205555457126e-12	0.600333700627353	0.44952813873353	0.388223123057124	0.371318299809422	0.418489271012297	0.0610903715666413	0.392202874088492	0.545608954027957	0.560007255270804	0.11681236581683	0.598732337065352	0.837606837606826	0.83272596660667	0.762225473596677	0.835613979423471	0.470812228219435	0.178126498968048	0.1520657123522	0.449099029950052	0.510803330614803	0.314811629778725	0.317211097365876	0.317691868024164	0.323404183341138	0
2011-02-21	0.0746385135498788	0.149865276979139	0.20388114729386	0.170940170940165	0.522257509178549	0.64607707821653	0.64260104596487	0.113959804784767	0.338309215782579	0.537843951031846	0.563896367776991	0.332823640595188	0.400038368814649	0.646025191555875	0.274115490382148	0.4111479773418	0.447495224246573	0.555337112840729	0.666666666666667	1.26211925058251e-12	0.594031117454758	0.444271548654109	0.3914566456876	0.374323457972995	0.429423696883944	0.0618988240537493	0.419085212933198	0.617880812494268	0.549958357450808	0.117083735147929	0.564160262895876	0.829059829059836	0.844131118665409	0.800727220018545	0.811515338443922	0.477305325688533	0.180995858591272	0.15675262124722	0.43530304683809	0.508544231195717	0.314653040644915	0.31902128486822	0.318548055828657	0.324599829210687	0
2011-02-22	0.0836343477866399	0.13199002139673	0.202369255500532	0.598290598290602	0.384919294296393	0.566231214401069	0.465604374161102	0.11432075228058	0.318462981620225	0.483016079104496	0.558703656002884	0.326130400384911	0.405899005436591	0.561165246386823	0.268427475216202	0.385571322591298	0.426890877598152	0.536740273236964	0.555555555555556	1.26464474127718e-12	0.565923377230641	0.456211913388487	0.390568630080644	0.376539321103929	0.435373169250379	0.064922226191644	0.446705816311156	0.669271409771428	0.50668049918023	0.159562256938605	0.481258022340537	0.401709401709399	0.697432695902928	0.773580424369337	0.558161822410584	0.470640057235499	0.177048210080269	0.208154687076357	0.371120017235205	0.395789185038749	0.312802834083788	0.319103566118327	0.314649489774043	0.323038961401881	1
2011-02-23	0.0798860835213237	0.115391569784495	0.203940380949704	0.531531531531537	0.415937950214624	0.522951033415895	0.50022000859281	0.114479221334974	0.306675963684149	0.494427721459539	0.562939011272503	0.327783799233455	0.412294860014875	0.462807437649006	0.258081994069541	0.377807526501785	0.426890877598152	0.512763590389566	0.666666666666667	1.2642211836327e-12	0.565753239817208	0.461936040440592	0.389203457771124	0.378022588789462	0.438722396221177	0.0679630491257011	0.46997386039693	0.535993593310691	0.50961219009862	0.16035190131991	0.457621770319929	0.468468468468465	0.623738199723438	0.728950937258588	0.468186947787116	0.468029477923583	0.17653662770914	0.190795925208201	0.394416330941505	0.536459473448232	0.311216942745679	0.320008659869498	0.313033704480973	0.322320494914587	0
2011-02-24	0.0771373563934249	0.0989815434819345	0.203051123987055	0.564814814814822	0.410783202982827	0.623347149680431	0.487113946854524	0.109037783488752	0.310882639842763	0.488792609220294	0.562848674541525	0.334319567580045	0.418182257534635	0.45964419396082	0.250362760340862	0.371960511772051	0.418537764092037	0.488034298361637	0.555555555555556	1.26330528956572e-12	0.553956669265995	0.466954209750881	0.388161484954345	0.378988299900173	0.44012048697142	0.0665946635442457	0.444275801540876	0.497040828865619	0.518010174140563	0.157231415648621	0.421849959905128	0.435185185185179	0.562591062109963	0.677183644813113	0.411266310481278	0.465579941049736	0.178187602669994	0.175095568253366	0.399514193386957	0.506153680328328	0.308996694872327	0.320310357786556	0.311777739968623	0.321631093756898	1
2011-02-25	0.0888819177580857	0.111110559088956	0.205289626319077	0.28865979381444	0.500586700842881	0.650924031372359	0.593314824365794	0.108717288823318	0.319990048268074	0.520315065359012	0.579162480806727	0.33932995783899	0.428012427332778	0.516069001692658	0.236487189759254	0.358173517110621	0.447495224246571	0.473126272819521	0.555555555555556	1.26272580892186e-12	0.594315366791463	0.460469055456235	0.390908829941475	0.38034331858353	0.442647099389122	0.0710765044456816	0.505116349152283	0.685508392617928	0.534256003867619	0.168241967017663	0.527798263506625	0.711340206185562	0.621536588194545	0.663893789463278	0.542188759243988	0.47151412826162	0.179470860499054	0.245588186253048	0.453709628778439	0.58668119179934	0.308520927470894	0.321380014037941	0.313890206523746	0.322742859787613	1
2011-02-28	0.0918805291703401	0.122373216438333	0.206641866034679	0.247422680412386	0.510620905685139	0.699864588875551	0.5995133869796	0.102685082668048	0.337571722183336	0.519772016866903	0.565342015174364	0.339966345735071	0.433899824852538	0.536987826896313	0.234654801655933	0.375902936961263	0.438585236506714	0.472847229274793	0.555555555555556	1.26290333484099e-12	0.581561625538071	0.454631288376874	0.396990367068976	0.382716647419993	0.445959103218758	0.0735447695920947	0.497852182559347	0.594199287369439	0.527273091152762	0.167106034378119	0.521361005409833	0.752577319587616	0.675722939459555	0.674542152276351	0.635023102297326	0.477121288637603	0.182091752422369	0.18722019206549	0.461325121678604	0.519880921979952	0.30830947529248	0.321188024454359	0.315656066194436	0.323855616421637	1
2011-03-01	0.0918805291703391	0.141550668656754	0.208763936904517	0.15151515151517	0.538471718501312	0.681558443495728	0.625047622327705	0.10132914862065	0.34419942527137	0.526773878071766	0.570190831542042	0.335492550894595	0.436629436429881	0.615869750824777	0.22936434437247	0.37990307234969	0.441926481909161	0.496948495172492	0.666666666666667	1.26229829144276e-12	0.585948791832741	0.447233682182258	0.403422292041319	0.385978908216347	0.450298211671618	0.0791384977271414	0.531785420538759	0.650230365377623	0.549635172090556	0.159840984004403	0.589935192840956	0.848484848484832	0.746476154694672	0.70711375897575	0.73377454958083	0.484039019591131	0.182451637104565	0.192980149187486	0.476752242058804	0.53563621049002	0.311322668834887	0.321791420288474	0.317816564718238	0.325324660842112	1
2011-03-02	0.0948791405825924	0.163559519142222	0.210909442944551	0.119999999999979	0.572653899454839	0.693949825801122	0.657068883100129	0.103277136290134	0.356499143793762	0.536655111916922	0.567495913574248	0.337673156172744	0.434220955626342	0.648463285846306	0.228370167915988	0.383020567162247	0.421879009494483	0.520143526267417	0.666666666666667	1.26234529600061e-12	0.558067330098394	0.437942863130101	0.40930490699471	0.389835858325824	0.455946654473272	0.0852854241606352	0.554424278673806	0.682730102064108	0.544454204379653	0.157631813759426	0.632897326838293	0.880000000000023	0.805024025467638	0.74990667181792	0.796427694940923	0.492583056209937	0.184690769918989	0.215924116195054	0.479742792937388	0.542135701097812	0.314494451511104	0.322614232789539	0.320508317286235	0.327237560862717	1
2011-03-03	0.102375669113226	0.19874201171174	0.215219246896639	0.270072992700725	0.621960196098893	0.603305345497518	0.693096559069016	0.115128918109153	0.339860686004846	0.554138063988743	0.572411304805525	0.344001457440295	0.436076377874994	0.704647916419929	0.219132745236397	0.400662682060572	0.444153978844125	0.551968843827686	0.666666666666667	1.26222790878294e-12	0.587968608224507	0.425081047773063	0.419044191309253	0.394986191558741	0.46355224074825	0.0969194775720032	0.6535127080261	0.713518204080264	0.556444455982349	0.160829664700085	0.757388614472265	0.729927007299276	0.78986963213713	0.772979368788874	0.73911323755214	0.504121744378256	0.181717596622612	0.249198336084535	0.492135651781842	0.559435103795289	0.318934947257809	0.323766170291031	0.324269336484916	0.329919875228489	1
2011-03-04	0.0981276362792004	0.23141146909772	0.217440748680911	0.0656934306569475	0.676350891896312	0.654609191241735	0.740780120928263	0.125777145260838	0.353893048052145	0.5755353962776	0.567132144897563	0.346849384001199	0.435933653086636	0.711287671054476	0.207233075581863	0.423957955290433	0.456405211986428	0.573566559828464	0.666666666666667	1.26239055529939e-12	0.603735207757631	0.408188501400804	0.428307032704997	0.401070223196566	0.473784501918712	0.102054290699818	0.638404855625196	0.51326572409449	0.538624503507395	0.137945029455198	0.718940311248804	0.934306569343054	0.853561285011602	0.81129154870937	0.817187856144875	0.519180059235882	0.185827567132138	0.258865715378797	0.50556423472084	0.571659798585175	0.323111127781494	0.32568606612685	0.329279523054964	0.333536405244554	1
2011-03-07	0.101875900544518	0.267575870131989	0.219628089107412	0.146496815286629	0.687203596297162	0.622243928350511	0.7120671536965	0.139160838512865	0.352318433637061	0.573867944857782	0.571549724729517	0.339616302884321	0.436236943261897	0.722719707646223	0.209442728518537	0.472583564374419	0.454177715051464	0.593931553473975	0.777777777777778	1.26208177233874e-12	0.600470726729054	0.395249126975598	0.437730092792182	0.407935180659058	0.485222827487973	0.107789326464791	0.622374476693968	0.552045949024162	0.555838190095504	0.129393330916522	0.69577494391061	0.853503184713372	0.866847004056797	0.841616150146529	0.806596789175895	0.531703838255955	0.18526230415485	0.274628335056007	0.492515150867237	0.523696439565317	0.327393034394388	0.327797951546251	0.33315597038591	0.336800079171037	0
2011-03-08	0.103375206250644	0.301157099663809	0.218213541126734	0.203821656050953	0.652282768008583	0.585790081549467	0.657036926302105	0.148057154964074	0.338142218995594	0.557735935941648	0.564460713268792	0.332981642269358	0.435443036626657	0.701803684796134	0.209418000742114	0.45525089774337	0.449165846947795	0.594181964406719	0.777777777777778	1.26223292385391e-12	0.594001697167417	0.38974287437835	0.445282824353073	0.415028360516767	0.495786893737179	0.110519239747822	0.579324932949636	0.571679728049228	0.545221435699127	0.132692833376347	0.629150455575726	0.796178343949048	0.855006079269842	0.857569560341606	0.76431059081367	0.538706826807086	0.183541678085996	0.212185467646494	0.460579095969942	0.491444353979996	0.330617680115209	0.331034347383776	0.334935784180171	0.339013315604513	1
2011-03-09	0.100626479122745	0.332616138192199	0.219636155275369	0.178343949044589	0.66063950777271	0.56340648633784	0.643601239108519	0.152404927785397	0.311271602059553	0.554034909443388	0.566749720604982	0.332323463202529	0.435657123809193	0.706585683484247	0.204631571440804	0.460334564888057	0.451950218116499	0.591365958748712	0.777777777777778	1.26227588588175e-12	0.597636504464372	0.385981120377417	0.451981843765423	0.422123127381952	0.505183533454842	0.113040926390395	0.54341125328957	0.521476828074405	0.540681872589391	0.132379392642961	0.607252979538762	0.821656050955413	0.856311271997243	0.868675064941155	0.753490226831485	0.544290752649519	0.18008780873828	0.197944621777878	0.450206083474318	0.519421619969927	0.333313695389994	0.334078753637717	0.33647987534362	0.341027275295342	0
2011-03-10	0.104874511956771	0.325822400713061	0.218280150846959	0.458598726114637	0.506014878536555	0.509401402490011	0.520447275638355	0.143601581100326	0.282425511868608	0.503990652400473	0.552104089609224	0.328167932963427	0.439403649503585	0.695369673773521	0.200219748044681	0.396033646913201	0.455291463518947	0.567254111916536	0.777777777777778	1.26417157139849e-12	0.603961064442792	0.397340832343052	0.455383679455628	0.428520145713298	0.5097940631882	0.115795818339453	0.510545156512264	0.530218921557316	0.510226763129846	0.16129114439114	0.513782417494809	0.541401273885363	0.755990832043094	0.839961191782703	0.592447686374572	0.537907141885758	0.176989312661539	0.227060247628933	0.383129903347357	0.414715827386121	0.33252074972094	0.335971222390168	0.333576234479223	0.340440631799105	0
2011-03-11	0.105124396241127	0.30773018773423	0.217268437642085	0.585987261146497	0.448952920906736	0.470246790162191	0.456902086128357	0.133464757740768	0.260214645544848	0.480370947736837	0.557154855849873	0.32587252553094	0.441000383073339	0.705854697749754	0.191143156832249	0.376638945188561	0.438028362272973	0.532658368699471	0.666666666666667	1.26978089403316e-12	0.580471645700165	0.41284735395663	0.458142009560571	0.434222539068751	0.509493902647024	0.115865444716112	0.468050731159707	0.433431012745942	0.496692808886894	0.166872454851174	0.459608882807577	0.414012738853504	0.643114825813467	0.780180789525149	0.444312709841793	0.527665212584683	0.174666414274953	0.149262192323381	0.361828013268706	0.466165914843953	0.329190377910911	0.336410055724069	0.329852730733248	0.338945001348628	1
2011-03-14	0.0968782148574293	0.28852045335191	0.21822666931431	0.509554140127384	0.481485000143656	0.452229922976321	0.487823996611197	0.131776200382227	0.266741519510078	0.491924185252205	0.563745730061293	0.332173384987913	0.442882566219807	0.721068858454963	0.186456571393019	0.377363701476936	0.445824601545349	0.498472362407235	0.666666666666667	1.26241080302649e-12	0.590999716535563	0.421860008858286	0.460742706986213	0.439335813589235	0.506851003176469	0.112661458481312	0.429853748021835	0.411899160530716	0.541715966798649	0.128752483726105	0.448915558259527	0.490445859872617	0.595461582749832	0.723170982853391	0.420010881975098	0.521745864166229	0.17674651310358	0.133422558850249	0.392165970444259	0.537659592516568	0.326177184368506	0.337068305724922	0.328443040804423	0.338330693352188	0
2011-03-15	0.102375669113228	0.261235842557332	0.216976652531552	0.719745222929934	0.394165886608913	0.48254066478255	0.392579006365423	0.132058233856262	0.26744341450554	0.457635668893216	0.557612720647458	0.330312576216595	0.439466091598492	0.729924553074361	0.178466853099147	0.340092473209568	0.409070902118439	0.462610595601445	0.555555555555556	1.2643067818534e-12	0.540783351477479	0.439143503126508	0.460634209024853	0.443403431137944	0.500330607258709	0.11207224263304	0.412488786566292	0.447541017750266	0.509770780031492	0.147248093625975	0.381751233118506	0.280254777070067	0.487799827711425	0.646403868891039	0.302485356477368	0.509085629923994	0.175728951854714	0.151360783400072	0.364512602539579	0.436405570304354	0.321895277755612	0.336519764057545	0.324553471288518	0.336152256195371	1
2011-03-16	0.104124859103708	0.235900132533796	0.218040711675069	0.675496688741721	0.42540056525331	0.49372846749538	0.423579748341653	0.131444850841765	0.281332862530792	0.468671668306472	0.564712351999245	0.330330804251102	0.43696840780223	0.768947198530261	0.181731867809967	0.331923634764786	0.412969021754627	0.4303470819222	0.555555555555556	1.26346279411911e-12	0.546100592794003	0.449296725022038	0.462170453846744	0.446983216156911	0.49245516687776	0.113016955504538	0.388952851709883	0.511506596994592	0.519335241788791	0.147987416706245	0.372112716426264	0.32450331125828	0.432001980928736	0.575137353059342	0.279461197151182	0.50125616192606	0.17750574088278	0.13818816160566	0.398587932662878	0.535793100062838	0.317983412454943	0.335888941140061	0.322943683687922	0.334928505696067	0
2011-03-17	0.0931299505921112	0.215678525223579	0.21712967636223	0.940298507462677	0.366844504903714	0.477534909212236	0.359214849251448	0.1343473223757	0.279775454671102	0.445177965822348	0.563120539782418	0.332047239112878	0.430679596815214	0.71442168078074	0.180872837315855	0.292819208473607	0.393478423573691	0.419781147712566	0.444444444444444	1.25576492370464e-12	0.519498988761794	0.464456397725934	0.461188477370234	0.44963886063492	0.482344830774457	0.112269984347847	0.361579899025133	0.342469875409375	0.477166956045026	0.141283383879379	0.338779028420642	0.0597014925373229	0.299192391181212	0.479811998226692	0.135238215862578	0.489327869955539	0.175707880452608	0.1022036992238	0.386387873428762	0.456029242242121	0.315128808046347	0.333996472387611	0.319725200150539	0.332708475997823	1
2011-03-18	0.0888819177580847	0.196901318435518	0.217768102520953	0.883720930232561	0.402251380913689	0.473635775572467	0.396093450801612	0.135872282331718	0.283066134593461	0.458381304669687	0.566559214661255	0.331689219281331	0.42458703241219	0.704951105468662	0.185851818659912	0.297683247379554	0.392364675106206	0.430074087027181	0.444444444444444	1.24919723324611e-12	0.518219334225188	0.472229838590718	0.460663863462549	0.451652155651907	0.472227832847841	0.11092907329309	0.323460639865559	0.365741193480735	0.483127624092636	0.143412172159638	0.356101175880037	0.116279069767439	0.231080923785794	0.391740150261391	0.108430416456659	0.482533544241947	0.175955358165875	0.0797483621657481	0.415653414996904	0.538306254650126	0.313965821065068	0.331665170301259	0.318652190360777	0.331501477707757	0
2011-03-21	0.0851336534927676	0.181295553015422	0.217064119467537	0.930232558139541	0.387080247106216	0.427469557789018	0.381516175850666	0.137342530567116	0.282642453197305	0.453174063619831	0.565204726640032	0.33325117114814	0.415836218826002	0.64961818031447	0.192910083337309	0.299565759469967	0.376772196561456	0.434056162486835	0.333333333333333	1.25779465539678e-12	0.497383005851142	0.479820345260279	0.457124997136556	0.452512535700186	0.462191561916884	0.108419478889259	0.295572917560964	0.310429851634817	0.470703815874263	0.141602844168945	0.357930150931253	0.0697674418604591	0.1688794952985	0.310631716240803	0.0847653948613853	0.475726837999189	0.175168792863702	0.0669315838804224	0.413529419705007	0.49708108449378	0.311851299280923	0.329004743214481	0.317400527550021	0.330209238829819	1
2011-03-22	0.0853835377771222	0.160711623780388	0.21817155421419	0.72727272727273	0.45731139016705	0.506750917106763	0.444399340924898	0.13272409795721	0.298617288333865	0.475297296980688	0.567843883482721	0.334926134496096	0.40801311636414	0.630381375394001	0.20512155932982	0.315026240337068	0.374544699626494	0.459531471090026	0.444444444444444	1.25504788151334e-12	0.495273385560609	0.477938738242577	0.456149306797891	0.452993988891829	0.45445863710106	0.106942875209068	0.298726449881029	0.37971980023541	0.478270054010107	0.147699382725319	0.393811619568204	0.27272727272727	0.200693840919403	0.268013284084289	0.198085163489761	0.47588602825546	0.17757277697951	0.0957470711184871	0.455088704435317	0.565346627571871	0.312749971039185	0.327249409878874	0.318711377479838	0.330370731764864	1
2011-03-23	0.0763877035403611	0.147941093674104	0.219168463202867	0.659090909090917	0.481921669586749	0.533140777405698	0.463406096931213	0.125121668720205	0.314446904646801	0.48193132120751	0.571353037519405	0.336094531975779	0.399092817091777	0.552218636574234	0.226007472050527	0.355176006342976	0.376215322327717	0.482560435815933	0.444444444444444	1.25822535767456e-12	0.497721434332787	0.473664487866056	0.455412309240822	0.453222904567564	0.449179252995988	0.104846508868654	0.295185239306291	0.253909579994202	0.469032466794612	0.141605034322117	0.437410239375633	0.340909090909083	0.246521564653658	0.256099974436855	0.301774665662357	0.478058073688871	0.179101731224998	0.109216396459368	0.462269862560641	0.531022379032729	0.313542916708239	0.325631211960112	0.320389761859418	0.330959904581728	0
2011-03-24	0.0691410592940803	0.136082744289698	0.218464623664621	0.750000000000015	0.446614230175726	0.497123031058728	0.415651023234835	0.114125956165544	0.314521107233587	0.467375419460806	0.565402713433926	0.332993417876748	0.390788018469208	0.456101490084647	0.246446004641426	0.36139616697885	0.374544699626493	0.503436611081377	0.444444444444444	1.26016839601949e-12	0.495172474012579	0.474108600283264	0.453531979493631	0.453007398538726	0.444811247491638	0.104169581482925	0.273764452558593	0.303220529974382	0.440625855693266	0.128625069239251	0.431927507619958	0.249999999999986	0.244249167160508	0.247339655425555	0.307886868516189	0.476958790978965	0.177955826866884	0.0896541975003559	0.442829043812258	0.483816430376958	0.314970218912536	0.324890680709154	0.320436038877312	0.330832565423392	1
2011-03-25	0.0681415221566629	0.139543151669834	0.220050818162732	0.500000000000011	0.522343294368155	0.513054769262976	0.502447158855679	0.111020762661141	0.32825550784518	0.494364086818687	0.569661933948558	0.336131432136446	0.3843029608982	0.430015202801956	0.264757349147249	0.374105073095655	0.387909681236279	0.52002822386889	0.555555555555556	1.25942119842584e-12	0.513218749622205	0.465849229985389	0.453323594163365	0.452790815065571	0.443230690607198	0.10178811685995	0.316017633855648	0.433008952399009	0.456810844564326	0.142569937218282	0.500702010227262	0.49999999999999	0.333000822117367	0.273451971130015	0.449504175976934	0.482488691386821	0.180447660161732	0.119334920907059	0.471836449075632	0.573426231410234	0.317243329830493	0.325466649459899	0.32296973066017	0.332150288010642	1
2011-03-28	0.0698907121471451	0.156273438625806	0.221668088552338	0.442622950819676	0.539840338019463	0.424821222621805	0.516739730897364	0.109416662674182	0.309208420666059	0.499499265135338	0.573567470763025	0.337881624315407	0.383357409175329	0.541746391200494	0.273744652013626	0.406663743381586	0.416310267157072	0.544214234792966	0.555555555555556	1.25839040052311e-12	0.550496399480492	0.457739104910645	0.453567610950215	0.452669280970088	0.443904652065429	0.102755698638573	0.350855490627571	0.504370102215535	0.468007385433707	0.143353702556896	0.603888866628624	0.557377049180325	0.412885513607715	0.319620410049553	0.549696243012366	0.488312922264308	0.176351821200667	0.141847064655868	0.469549693188527	0.526271532261355	0.320203660328296	0.325905482793801	0.325284568624806	0.333583901965773	1
2011-03-29	0.0753881664029436	0.177215390433589	0.22378933226491	0.227272727272721	0.580987706943358	0.409800067606122	0.564226764622784	0.111623856657118	0.296891287080117	0.514589702140448	0.567338220514798	0.337142100899517	0.38573912908105	0.562908765775783	0.274484705492272	0.411180093026025	0.436914613805492	0.551993738488563	0.666666666666667	1.25573650949504e-12	0.57786360962781	0.446911993536161	0.457447476704231	0.4533946031088	0.447076217927488	0.102752678828497	0.40605370009424	0.545997068440978	0.477286649807765	0.147625282441954	0.66497956207936	0.772727272727281	0.543897693030133	0.397566606751239	0.71133005093403	0.496567578180116	0.175566924320196	0.155410370743946	0.476581794092797	0.548064007402327	0.322793949513873	0.327715670296145	0.328347375628819	0.33562016083504	0
2011-03-30	0.0723895549906902	0.196661488540815	0.222580214360695	0.336363636363638	0.5399857344383	0.33970555676367	0.517911572008128	0.113289875904019	0.277561152978946	0.501211363068086	0.565493513200751	0.334855052923111	0.383303887379695	0.568385962188212	0.27146633712863	0.421742264100303	0.423549632195706	0.555068082105693	0.555555555555556	1.2664073647374e-12	0.560115171769384	0.442941585514676	0.459774320376962	0.45446816239858	0.45065583330288	0.0993340854851434	0.397292350950741	0.465407052836667	0.499329553127198	0.12325148131767	0.634449649011096	0.663636363636364	0.591850089999227	0.46679464497255	0.721510865435282	0.500021852443867	0.172848469830952	0.172748829785032	0.448841719193667	0.484546279224078	0.324274114762775	0.328895034881005	0.329316601063	0.336676801174124	0
2011-03-31	0.0771373563934249	0.187806543049619	0.221642340348361	0.609090909090904	0.448355450866152	0.337144840685275	0.423459462249487	0.111821588148987	0.262423543003122	0.472017019726181	0.54720995945204	0.329170937478352	0.383410930970964	0.57117417761895	0.260805827750595	0.387242202050542	0.42522025489693	0.550745186049459	0.555555555555556	1.27579859844404e-12	0.562724211432088	0.449411342777712	0.460394872407726	0.455458569719921	0.452059466572274	0.087023744500076	0.374832994342152	0.47149906949825	0.492388124951696	0.130866639136896	0.512310039563488	0.390909090909097	0.525345714697337	0.489003647191812	0.565116686688687	0.49561534164739	0.171095327633336	0.211905217127328	0.40385374284658	0.444213285107375	0.324802745208811	0.329909836965653	0.327281136597889	0.336017850975767	1
2011-04-01	0.084883769208413	0.185749694883968	0.223063164579307	0.163636363636349	0.565680219623072	0.325415274856527	0.591753921344033	0.108781943951883	0.281950064386387	0.523000218324507	0.569975204762009	0.336619896156894	0.385194990825436	0.649070015054531	0.253508818112419	0.432089506501608	0.44638147577909	0.547559368319966	0.555555555555556	1.26360462926654e-12	0.590485078104212	0.439993570981426	0.461840434619545	0.456557361425868	0.455476141928125	0.084100607342235	0.384993586472992	0.54511875078863	0.519062637536562	0.160610306520266	0.5802078296666	0.836363636363653	0.641848109744407	0.545753047763234	0.723969903587997	0.503031357306187	0.174799487482961	0.277559978459126	0.463033789823444	0.61886923445782	0.326441499591524	0.331939441134948	0.330304131053606	0.337967050954234	1
2011-04-06	0.0858833063458304	0.204320537120995	0.226338931794506	0.0559440559440477	0.643547036910445	0.431291037957983	0.724595977575525	0.114128444133765	0.326653348127787	0.565837273439723	0.575705769464073	0.351582856480393	0.394213413389795	0.767060208561728	0.24403296074124	0.446205948975037	0.48369204943974	0.549884307699824	0.666666666666667	1.26219122926687e-12	0.639514259801444	0.421049459083975	0.465302115560237	0.458170287098645	0.462866084179473	0.0880742678706409	0.487631203424085	0.634381990057455	0.572724265701786	0.158227070416902	0.688664983095562	0.944055944055954	0.758400441191131	0.625547358760684	0.85518660479069	0.518149527040154	0.180725263528478	0.327181756772466	0.508575764344203	0.602752143081716	0.329983323579966	0.335312972389316	0.336163108505629	0.341745497164035	1
2011-04-07	0.0923802977390473	0.230460448252824	0.229190821613244	0.0988372093023281	0.674653998576865	0.498146060866983	0.745358732292177	0.131770156636745	0.358890845055687	0.583384603918417	0.572222564365878	0.350468778025687	0.403303198348333	0.792678754320044	0.229477243441693	0.45446033969422	0.488147043309669	0.554594499422092	0.666666666666667	1.26215696022873e-12	0.644322786702089	0.402414384897039	0.468988432387513	0.46024214378778	0.473490119266381	0.0933217577220784	0.534844219462058	0.637908016534847	0.578218102981941	0.159493808000694	0.689945223244929	0.901162790697673	0.820614721317045	0.701142061672458	0.885512298603254	0.533821996342393	0.183403971470284	0.309534896549959	0.51595557939755	0.552696072942111	0.33368373670222	0.338576795310208	0.341856836643354	0.345852602561975	0
2011-04-08	0.0926301820234019	0.254733222875238	0.228012293451126	0.116279069767438	0.665216677531231	0.571386308545359	0.709713618181461	0.145068635282531	0.3764463101256	0.577689502405969	0.5653702249687	0.337683988997533	0.413490180117371	0.777486260257544	0.219345615012639	0.462410084204712	0.489817666010893	0.566413734207223	0.555555555555556	1.26199272425443e-12	0.646819911100273	0.39092868094775	0.471463894869727	0.462424438590224	0.485011805415253	0.092430641424473	0.497393294169305	0.523729313257813	0.593681198395556	0.146242423594589	0.647097799489038	0.883720930232564	0.855793239233776	0.764203562753221	0.878208608366337	0.544598567345706	0.185002916120481	0.298222031825653	0.494518454508584	0.504553885849541	0.337859917225907	0.341511493230675	0.345384493926381	0.349060614112709	0
2011-04-11	0.101875900544518	0.285774301698118	0.225533994192245	0.273684210526313	0.620714721605978	0.528272746720541	0.641062108884815	0.164189542430153	0.342636575967484	0.559151335684035	0.570842519784676	0.329561746302023	0.42076914432362	0.79985139732222	0.196520087689333	0.42754634295511	0.468656445128731	0.585963004520687	0.555555555555556	1.26213482383451e-12	0.61879443064016	0.387874522979169	0.471785261017535	0.464238405536105	0.495134253213764	0.0965279483957677	0.522044620076854	0.695970019948968	0.575405774055331	0.153019609788779	0.632257711786243	0.726315789473688	0.822411885421275	0.79422654921213	0.776991832169077	0.549045779514464	0.17901176052709	0.366227198642751	0.457853559161713	0.48147861982245	0.342881906463251	0.344391336984405	0.346484845229601	0.350974396250367	1
2011-04-12	0.107123470515962	0.312288262331935	0.227231480770991	0.257894736842109	0.626386696483267	0.526223549258291	0.625128219454218	0.176579527932265	0.311942205226716	0.556806446270555	0.562267387359648	0.330325684207917	0.428369239303673	0.759484029175863	0.183817180055467	0.424126377569072	0.465315199726285	0.589719824354402	0.555555555555556	1.26207306115082e-12	0.614145313651617	0.386245928641265	0.470718242703915	0.465463366294376	0.503726636509241	0.0990315899961797	0.506812494492367	0.621333947731006	0.581841188381533	0.150491699915258	0.591754773008858	0.742105263157892	0.805858697122205	0.808282365279713	0.727801640850984	0.552276269219828	0.176587517197584	0.317954728276047	0.438327920648935	0.517109604899276	0.345472195648828	0.346585503653912	0.347486574240538	0.352692565410574	1
2011-04-13	0.126114676126902	0.351931010916596	0.230413215352036	0	0.766958276541596	0.606978163245444	0.778477905179157	0.20533965275037	0.350669087309881	0.646999173445715	0.5806926056041	0.361287492607924	0.445041278643718	0.784238284247826	0.180137904560002	0.486926688745625	0.527128239671543	0.597477830067318	0.555555555555556	1.26193946072821e-12	0.690496650264658	0.359317214999928	0.474806132759403	0.467309986426409	0.517535578611282	0.107149219804008	0.55125383703067	0.648799896726245	0.631025763549579	0.222507978068372	0.65425693041763	1	0.887940348663087	0.847204091232329	0.840998418506734	0.575374092021133	0.185221027452554	0.446885947001038	0.543734351818601	0.712302593169232	0.351022815332209	0.351302961993354	0.35700372227123	0.359125804748121	1
2011-04-14	0.134110973226247	0.396662003593859	0.235025263923353	0.154716981132082	0.78141677036981	0.516987224096185	0.727737060902693	0.250194478907989	0.316340153316858	0.64797471383804	0.578353295182792	0.366553592083708	0.459661649151121	0.818560481481115	0.176343568396111	0.508187403600744	0.519332000399167	0.603023956601233	0.555555555555556	1.26193391878326e-12	0.678762810241848	0.338224084056562	0.479834140603138	0.469853243359852	0.534211026215545	0.119423424327609	0.623535146575701	0.723469760680775	0.633388040258944	0.222287674530473	0.704506622523971	0.845283018867919	0.886798354575209	0.872740765795171	0.808039181766849	0.594924731680196	0.177211676804818	0.386154754413747	0.534133977040905	0.538311979315108	0.356256256747968	0.355938139082689	0.364599907843823	0.365100318791786	1
2011-04-15	0.145855534590908	0.440260128833665	0.237973782660183	0.0142348754448372	0.830203895742427	0.57207545303056	0.746652498717524	0.291306027855706	0.342412297437119	0.686342169637537	0.568756948643442	0.352761368470791	0.476360449388985	0.858528844454616	0.180114164531577	0.578016955099854	0.545505089384998	0.618591910547891	0.666666666666667	1.26184873720466e-12	0.708335755176265	0.311389804383152	0.487202706589777	0.473450018844096	0.554861267276055	0.126303264828668	0.618827929205132	0.707911549661866	0.676020276292882	0.223593068185696	0.692181676995386	0.985765124555164	0.936760385829017	0.907752634693477	0.863316425699063	0.619879893123816	0.184180018258913	0.387052390684972	0.57180566390442	0.614770424491331	0.364502891706133	0.362383503674369	0.374490938117104	0.372730810956659	1
2011-04-18	0.14710495601268	0.482053351788342	0.240523864646903	0.00348432055749277	0.841296562406035	0.655541228187219	0.717552797931033	0.322715221684106	0.387940256639973	0.682470325862044	0.570275598176872	0.35020540080114	0.492176139998884	0.86545438091062	0.184717840432697	0.544129301019128	0.543834466683774	0.635794790930798	0.777777777777778	1.26185638007243e-12	0.704712530800381	0.291535779076925	0.497168160261578	0.478440161322568	0.576967504310775	0.132287144626416	0.600544256181472	0.557796796595163	0.664212470696997	0.222943278761881	0.669261292766051	0.996515679442508	0.973950070240649	0.944482976830522	0.891622771891428	0.640107891921334	0.190777724967023	0.333150691277049	0.549921725978511	0.537221281245785	0.3742296919132	0.370035659934278	0.382336378518088	0.379684895495408	0
2011-04-19	0.15160287313106	0.512589200967099	0.23821277779218	0.156794425087111	0.715773965461573	0.61407233476434	0.639610517746797	0.335314708879852	0.380558487496055	0.625166681751153	0.562669362955016	0.327104292515836	0.50428098611148	0.788620306836924	0.181281366203392	0.474036296031354	0.52601449120406	0.65285823628496	0.666666666666667	1.26203981222135e-12	0.685495697594926	0.291445387601552	0.505057923145031	0.484104941386209	0.594784775982508	0.13839374348463	0.576979452953649	0.539331104329206	0.632625031716258	0.24753664251661	0.602932160803981	0.84320557491289	0.9433880738614	0.957966887395287	0.815807308089937	0.64453312198304	0.187492893300018	0.281465494260944	0.458240184914331	0.42703870077281	0.381471929023897	0.375137097440883	0.383633637145381	0.383140172329288	0
2011-04-20	0.15660055881815	0.515059556317644	0.236062218391788	0.282229965156794	0.627855443766726	0.589741622841301	0.584259214782504	0.33089642756407	0.353945243806638	0.578110021241411	0.55343597981809	0.317088391312298	0.516546397610978	0.71658539582708	0.172409050490313	0.431275381311165	0.522673245801614	0.630344950566783	0.555555555555556	1.26231123114219e-12	0.68429443084581	0.303541728126994	0.509722546333338	0.489625687043809	0.60568101530324	0.143674946952783	0.551775475439125	0.485529060266376	0.598235683612219	0.263396353022402	0.54948681268789	0.717770034843207	0.877722857437384	0.94331525331249	0.705409974179647	0.638498608394675	0.184575164595082	0.278591829791542	0.388052543052749	0.44061841902944	0.381577655113104	0.37807179536135	0.381280538524763	0.38413904807697	1
2011-04-21	0.157350211671214	0.517353457714577	0.237460281292527	0.264808362369338	0.634599152573703	0.543702009802291	0.577934210125964	0.324274827677989	0.325328041047107	0.572134035176326	0.566046596511659	0.326710890406607	0.524084050496125	0.756552465631308	0.159110353186104	0.437323091318035	0.498170779517007	0.607298209316145	0.555555555555556	1.2622046197655e-12	0.651470890376284	0.31411543083501	0.516101121615864	0.495394570917039	0.611365022429443	0.144735980764452	0.506483023285635	0.506136079914647	0.60981784811899	0.259395759712606	0.539930065222191	0.735191637630663	0.840236400956259	0.920051556645134	0.660318283654378	0.632859763723297	0.182179214226733	0.237991077090227	0.393150661346176	0.520642731244803	0.381207613800879	0.380595087031284	0.380158741903446	0.385210222404372	0
2011-04-22	0.156100790249441	0.501780825755795	0.236112300219279	0.362989323843415	0.573301993037389	0.516983633258839	0.538202202628478	0.312132189681838	0.304825232976976	0.538349788232747	0.553471252286747	0.330462616496979	0.523245542364523	0.743964449820599	0.155977955044417	0.428997329888193	0.459746457388875	0.554747216524538	0.555555555555556	1.26217782000282e-12	0.60353755434828	0.331200246025819	0.519970814558263	0.500830070747791	0.611084859813109	0.146017685055059	0.466642583252076	0.540235425405742	0.61458594147872	0.255137890728386	0.494980697701233	0.637010676156585	0.779795588915914	0.882782417082035	0.587326693236947	0.621278425205418	0.180899021664144	0.245457573468998	0.365832541518066	0.459308629127556	0.376608528920364	0.382487555783734	0.377086811368611	0.384766293532622	1
2011-04-25	0.157600095955568	0.49143168520106	0.237688754718594	0.350877192982465	0.606608680383624	0.54026513009779	0.55663491426711	0.295873795873624	0.305137473702615	0.548916372725756	0.568326225773252	0.332914473129551	0.522050222262026	0.746503872934862	0.15502742527356	0.443045184246579	0.460860205856356	0.49663093340084	0.666666666666667	1.26226088895151e-12	0.604116600966543	0.340672380521043	0.526051980551661	0.506467705820029	0.608077345172627	0.149203453416609	0.44169388544241	0.49966964141417	0.593364855667621	0.243471705544417	0.498430723903791	0.649122807017536	0.743874997060351	0.845004128790189	0.562755921214292	0.615005159034711	0.18232490386138	0.231240323818169	0.40925229828539	0.554428906259165	0.372432348396677	0.385367399537463	0.377005375165402	0.385520293350103	1
2011-04-26	0.156350674533795	0.486642200283992	0.239400522089755	0.22660098522168	0.653648996909887	0.556168879717249	0.590473924229507	0.284114776327838	0.330076799583142	0.570370661725433	0.573714133526216	0.341170732985002	0.522041301962753	0.734868880613987	0.153388520670482	0.39290820292105	0.481464552504774	0.465877281320455	0.666666666666667	1.262295464442e-12	0.628354994939088	0.341301316521241	0.532865388855464	0.512422287828835	0.60525658573347	0.14966189855436	0.426227856407973	0.38164826035191	0.584905134265107	0.238062816806791	0.530381091003872	0.77339901477832	0.764799892113367	0.82735202112731	0.62479783960534	0.615346862478041	0.186565819794233	0.23177332745754	0.464821664969922	0.577088799797442	0.372379485352073	0.389097482875626	0.379990247751771	0.387863806285451	0
2011-04-27	0.160598707367822	0.490874184621111	0.23705898289827	0.301507537688445	0.619308132649128	0.566411870505954	0.561004831167603	0.27610268582163	0.32159491527859	0.547567021116785	0.574489403885916	0.335197425477722	0.523423948349969	0.73202359444541	0.151233768865663	0.373235209445174	0.481464552504776	0.470198127889698	0.555555555555556	1.26256668637621e-12	0.629088451671743	0.347569041227943	0.538718316351879	0.51842680103062	0.601122493010781	0.152306080395402	0.437028554585232	0.452472404460547	0.562650817782243	0.240845389252959	0.540005255447553	0.698492462311556	0.751703586922436	0.810868994307307	0.619100282440934	0.611084004080013	0.183711270840282	0.166781112624443	0.449425128030277	0.483673535089855	0.37348960928875	0.38972830579311	0.380728742590554	0.389070271374156	1
2011-04-28	0.171593615879419	0.499785532671474	0.239911519831966	0.180094786729847	0.665470912135307	0.55940833195899	0.593455554319235	0.271543908764296	0.308484250192809	0.568952797909737	0.572984474527707	0.338631601404475	0.526260603518581	0.784847991828449	0.143796173907339	0.359581428303498	0.49872765375075	0.482996542075068	0.555555555555556	1.26233641762176e-12	0.648867504100019	0.345768952682021	0.544666484251669	0.524491450591094	0.598090802784722	0.154975907192802	0.462524403638265	0.621928428887442	0.585942726996216	0.243662517603757	0.585099508477648	0.819905213270154	0.786810775199349	0.812519662009995	0.685563667852691	0.612972650591538	0.182259974803338	0.181449221351915	0.482495791196598	0.576299659631493	0.376132761518931	0.39090767037797	0.384260235871583	0.391783983167778	0
2011-04-29	0.175591764429091	0.484419580564515	0.237711557850616	0.379146919431281	0.568197373964658	0.573408613847164	0.527830109622875	0.253897105494399	0.297582611536615	0.521128998948795	0.547986293697042	0.333353049992912	0.516278788632807	0.710895179499361	0.129735511725515	0.322270835619872	0.42020838679326	0.509707739886658	0.444444444444444	1.26265037895401e-12	0.554433039221744	0.357193956156675	0.547375226237974	0.529917436020236	0.592494573857438	0.158593309888142	0.458534292687469	0.46470467769184	0.569568627776615	0.25665380629202	0.480341179110856	0.62085308056872	0.738344541071229	0.796171207492056	0.61074196473472	0.604352285990337	0.181308313892681	0.186697829423177	0.424609649880852	0.429701535053721	0.377930105035454	0.389454034959421	0.38286030406921	0.391871429060092	1
2011-05-03	0.1733428058699	0.470151196465198	0.238683234410816	0.369668246445495	0.571269539274314	0.589315940895936	0.522865399380425	0.218674735797095	0.294675951616598	0.512878138011829	0.564100536151533	0.324937831650434	0.505280059629985	0.725591284988144	0.122389892299435	0.352600786560956	0.413525895988368	0.530127800034996	0.444444444444444	1.26265834121217e-12	0.546546747771635	0.367101913898858	0.550639255289672	0.534950213560485	0.585269265638948	0.158716717223952	0.41093057651225	0.395934452840596	0.568796069124037	0.256756077994863	0.44683633679006	0.630331753554506	0.709456148143566	0.774871787305958	0.580050319617584	0.596503076988696	0.181399231330772	0.171753006913449	0.419310254871537	0.514711757602827	0.378670187659905	0.387671274540446	0.382105790517932	0.392044540640068	0
2011-05-04	0.160848591652176	0.43889810850107	0.236952174293098	0.863636363636354	0.494167324820649	0.538506855430601	0.448257228927808	0.183211451154761	0.282271045147782	0.47384633088849	0.555307509424466	0.327601173907549	0.485129103573717	0.651978902405113	0.118474207077044	0.352285490679939	0.363407214951672	0.518139413812647	0.444444444444444	1.25315181938443e-12	0.488051297351024	0.385402684919267	0.550161225372938	0.538875091047965	0.574626142839436	0.159849335522735	0.400285321929339	0.387970159960314	0.479300203721635	0.192526638683291	0.325922606669118	0.136363636363646	0.511841956175474	0.689526761631111	0.297464128424599	0.581728693911861	0.179264157335809	0.196132353355765	0.376185672800546	0.439719120869117	0.375709857162102	0.386107930788422	0.378384843778269	0.390358008452737	0
2011-05-05	0.154601484543315	0.407308532529299	0.235870698913325	0.920289855072463	0.468193085214582	0.479855916680032	0.409466767140823	0.163376203266987	0.275254384470331	0.45863864172955	0.556845707133388	0.326184289469139	0.464041516093851	0.560563860866578	0.116666312410538	0.339771098925311	0.348371610640664	0.501312589624978	0.444444444444444	1.25827918921937e-12	0.47051587233243	0.403856005349593	0.548629035797446	0.541690161788869	0.561284936673455	0.151838350360683	0.366022004285908	0.256047895708601	0.462064834993257	0.191384413933888	0.28457579356748	0.0797101449275375	0.359643492362143	0.577835316707393	0.135133982006277	0.566316865683531	0.178481613219789	0.159501106149132	0.373794483550695	0.484745422234486	0.372802389708902	0.385175409953881	0.374742179558181	0.388317946366019	0
2011-05-06	0.148604261718807	0.371131434428704	0.234810844654412	0.94805194805194	0.431031682731866	0.438038747416639	0.357414881193319	0.151954245393637	0.2659726679099	0.439749245273592	0.559972821750199	0.32991904244869	0.447244592563992	0.479886555823808	0.114886488129405	0.344297054316472	0.362293466484191	0.465631427191543	0.333333333333333	1.26031430359822e-12	0.485652918312135	0.423744522672934	0.545251030815062	0.543226065762245	0.545517734204683	0.145295934239068	0.336647058886042	0.323003978686428	0.415777126352062	0.161078740737713	0.272224258409554	0.0519480519480604	0.248153892337301	0.463235669696133	0.0556755031237341	0.54935206257193	0.176816634471474	0.161724369008304	0.364352352811863	0.472337260108341	0.367093180891711	0.383584639118489	0.370615380733563	0.385683937721007	1
2011-05-13	0.155850905965086	0.348813471804211	0.236428342910066	0.665000000000003	0.457542140653857	0.459025896742458	0.377708563473974	0.1418872358959	0.28834224736238	0.449397422128449	0.548545237603821	0.333025659288027	0.436343986853166	0.385892907532353	0.115172450677156	0.338306011248373	0.389580303937501	0.445623479191322	0.444444444444444	1.26032616385313e-12	0.517917279020236	0.435958809945717	0.543496536358303	0.544082828032837	0.529769467919989	0.146898539165688	0.337382502201078	0.412021821922247	0.415760995108998	0.161067841070941	0.271554178070816	0.334999999999997	0.276028025066719	0.39687119977224	0.189890543148785	0.537833330783805	0.180596065942633	0.19708726958629	0.403082251337294	0.537171541740336	0.364291439527719	0.38306352453448	0.369026214577464	0.384189011853991	0
2011-05-16	0.155601021680731	0.328089649367182	0.235561955892014	0.925000000000001	0.362219563684373	0.493600775711624	0.246502612817512	0.138039974935565	0.28630705855157	0.401434380859431	0.567984564790947	0.330819663181415	0.420974311206884	0.416072593243758	0.108243298106206	0.279956620878189	0.357838472614262	0.416993046099923	0.333333333333333	1.26036879355961e-12	0.47894522322948	0.459607566477949	0.540676978703706	0.544170478636323	0.511370306970872	0.141013722554092	0.304609085767233	0.329591841306392	0.408570009234298	0.169601982321098	0.271022345214673	0.0749999999999988	0.20073353013595	0.32552056208745	0.128954212457392	0.517481052813962	0.178339195492252	0.185635630683194	0.355157642417804	0.404016410360784	0.358635093755131	0.380512805781177	0.36331863823215	0.380325202229003	1
2011-05-17	0.160098938799112	0.294858219268732	0.23696725692433	0.569999999999995	0.492634966522995	0.544502972184061	0.408283615775222	0.122263423929492	0.304043737787956	0.462596881788943	0.578857004537359	0.337792189645988	0.411447431584001	0.500729552773492	0.108596404292083	0.337959863455865	0.411855273287144	0.429879507048408	0.333333333333333	1.25393387281084e-12	0.544587085589998	0.458263100691962	0.53927433440936	0.543943232066473	0.496849228255726	0.139947002968653	0.303587424891854	0.416687771796027	0.47858913811996	0.216311515410576	0.3837760851304	0.430000000000006	0.278715753181026	0.306028768680363	0.304457137086975	0.51553086264272	0.181129362662063	0.220829416268338	0.461571574777524	0.655746018630069	0.358635093755131	0.378976889112522	0.365860075587747	0.380769458843685	1
2011-05-18	0.169094773035874	0.279090080249779	0.238260226193216	0.444999999999998	0.530845633250224	0.46496695082041	0.470996399897228	0.117909067384079	0.315669063124952	0.485070483038647	0.602162800497248	0.344643189750791	0.40355296672796	0.497930193402816	0.109801834301963	0.332446826461192	0.413525895988368	0.451531377802456	0.444444444444444	1.34199903763975e-12	0.546559855433114	0.450762097889056	0.536997747758229	0.543278787951905	0.486960510325441	0.133051443022607	0.298239217737276	0.471128921653271	0.491474297887103	0.221087307120903	0.495782375886237	0.555000000000002	0.375837195187221	0.328000073713377	0.46737694528028	0.518626115752569	0.181793117928219	0.214946216848916	0.490283524829984	0.560332543726711	0.360643889450069	0.378510628695251	0.369789046120283	0.382402503288552	0
2011-05-19	0.171093847310709	0.264448236875036	0.237536716461316	0.535000000000004	0.497086520531006	0.5347094037837	0.423554458870518	0.117065988917128	0.310843765466891	0.469867114200049	0.572732987599623	0.334655775613839	0.392893209097487	0.513918341346512	0.110301045676379	0.348234829452254	0.384568435833832	0.485289950065808	0.333333333333333	1.27563369984722e-12	0.512518823120812	0.450395802124071	0.532823513894636	0.541862275849715	0.479150931211966	0.118855051074322	0.26585399797446	0.385845251411115	0.496523922521492	0.218399142232696	0.490902654363623	0.464999999999997	0.408088852008525	0.354258909147327	0.498657571241252	0.516861510491635	0.180238906144184	0.191936634088076	0.460736383555061	0.475218875896238	0.36270554818961	0.376618159942801	0.370799390955901	0.382824546094333	1
2011-05-20	0.174342343007317	0.258446811807262	0.238907694247232	0.329999999999993	0.558891410185197	0.465649032231119	0.545808424636764	0.112768604913492	0.314959927865115	0.5089991627964	0.573821196898335	0.33677065953059	0.387487507738435	0.509468205441789	0.109510266968085	0.375304424904995	0.415196518689591	0.512569943408108	0.444444444444444	1.26643321241307e-12	0.548481712317215	0.439556628238327	0.531370423563421	0.540421004323094	0.475543806145889	0.113095718178734	0.273892634899547	0.461488073316769	0.508612602040459	0.226955214957842	0.542045267480403	0.670000000000008	0.50360855758361	0.406153973414202	0.622442035640454	0.523311694730445	0.181301790058832	0.189297806022364	0.498330133231988	0.59129473623601	0.366247372178053	0.377002139109965	0.375137827677552	0.385251935131126	0
2011-05-23	0.180339565831825	0.241639089943633	0.237461023703317	0.549999999999998	0.479030618422455	0.372316229091012	0.425091359681623	0.101536478469288	0.311224740615424	0.473281526123309	0.549329819410478	0.332287786433473	0.375231016538208	0.427246443926849	0.10973592697181	0.369817934212862	0.371760328457788	0.553254356366429	0.333333333333333	1.25830660727671e-12	0.49770359388841	0.443782074208162	0.528392712625308	0.538636698664062	0.471749273793342	0.109067351234449	0.285522015102972	0.457004081392574	0.459625632871548	0.231538665279586	0.461899299133696	0.450000000000002	0.487853765075648	0.435078614557203	0.556914311075518	0.518857406422261	0.180469111848841	0.223715112808772	0.4328958622601	0.424342955947176	0.370212100523325	0.376124472442161	0.374097083851958	0.38500355200886	1
2011-05-24	0.176591301566508	0.227471735755125	0.238742714921545	0.419999999999998	0.518278789214085	0.424955392324785	0.517214760589742	0.0955018540555351	0.316243118126434	0.498296628710207	0.571279995055603	0.33026142075162	0.368719198069384	0.393798867818685	0.110059340802899	0.397711989744113	0.40962777635218	0.559769658591215	0.444444444444444	1.24466660875009e-12	0.541970250527989	0.440472190127432	0.526898627244179	0.536892501152515	0.469601901206005	0.10530920337248	0.287290316200905	0.38892071913091	0.484972500754524	0.236161954294302	0.513015568260987	0.580000000000002	0.524289195112199	0.467479256858229	0.588960724460488	0.520123257610883	0.1816283845657	0.202150712556474	0.445250717596989	0.562172281001252	0.371797991861434	0.376947284943227	0.375727320755517	0.386120673684811	0
2011-05-26	0.172343268732483	0.205817430865923	0.237447166115821	0.506250000000003	0.455260118163067	0.448961631129621	0.398292698041737	0.095630585339881	0.312249064148669	0.46570826746011	0.554888360829243	0.331653129816482	0.359825659694837	0.258350121686378	0.110205282185823	0.385062011783308	0.387909681236279	0.544305686648221	0.444444444444444	1.2594156437552e-12	0.516153491138699	0.448356151256868	0.518101139410208	0.533632035190851	0.466109158689383	0.102187705549494	0.29050726669221	0.35966543775735	0.440359152635949	0.234826313858501	0.448858948157615	0.493749999999998	0.517437509419691	0.486612929012077	0.552574896247115	0.513094080359942	0.180695722073433	0.218409133086707	0.396830211393042	0.437453486166322	0.370106374434118	0.37711184744344	0.373506820493926	0.385155730923782	0
2011-05-27	0.164097087348784	0.185261052455856	0.236399567481039	0.622641509433956	0.424941794226434	0.442386637269119	0.342863964266308	0.0963789085426729	0.294130674354486	0.450636683884728	0.562555018994902	0.326940225023019	0.359219079344317	0.280952586383226	0.106366166426474	0.361961034818367	0.397376543209877	0.528273519024955	0.444444444444444	1.25878157871787e-12	0.527101292031476	0.459678917349842	0.508180344944774	0.528920408287945	0.460710747051692	0.100908220300959	0.280636274808614	0.367084780348542	0.453869017997264	0.227106831584808	0.422646960445629	0.377358490566044	0.470844661885893	0.48259427076243	0.466567260511248	0.503285769829237	0.177853104838681	0.212285882070937	0.382389806942444	0.472481101575257	0.368361893962198	0.377276409943653	0.370328130974974	0.383401365363426	0
2011-05-30	0.167595467329748	0.171852975236393	0.235736270385037	0.641509433962268	0.420063585510474	0.468221901850986	0.34523929233602	0.102031065854021	0.292164778330004	0.449183898054209	0.539431669386827	0.331008289911333	0.360682008424984	0.287958615744212	0.107552192399288	0.398120448427531	0.402945285547287	0.49580529277417	0.333333333333333	1.25898214224642e-12	0.533772942203943	0.469111679968936	0.495913534621319	0.522550486461624	0.454224580113533	0.0984085559017862	0.251255442363678	0.423533698806868	0.450652975620368	0.22684224307956	0.36225501359496	0.358490566037732	0.432970190955008	0.466279530999461	0.412356175086942	0.494648352821154	0.178564665651841	0.175172905737779	0.386303383060002	0.504710753753504	0.364291439527719	0.377002139109965	0.367940843153549	0.381813627948282	1
2011-05-31	0.165346508770556	0.163315269204847	0.236587285411866	0.584905660377367	0.436900183085411	0.470686851103209	0.385010815505967	0.106704462670269	0.302581913273748	0.459341862374247	0.563017638307326	0.333448797752077	0.36780040724433	0.364996157186067	0.109266808092603	0.352804014281932	0.418537764092036	0.473233626454626	0.444444444444444	1.25335920120738e-12	0.552723087902111	0.473714708021065	0.484317592294273	0.514996155802621	0.447995278328328	0.095760100142063	0.238708663056628	0.372081716478317	0.479155196150194	0.219876212892462	0.3791099564878	0.415094339622634	0.428158261392798	0.453670638400526	0.418148595014937	0.48947551237653	0.180225665875058	0.18209857903234	0.413915550562121	0.529046759470128	0.363022726457232	0.378400920361775	0.367153802365635	0.380971612296811	0
2011-06-01	0.16609616162362	0.155387399318412	0.235791533132158	0.729559748427671	0.396519072337509	0.396446714809864	0.328077413994952	0.108434956701188	0.302879002360209	0.442623848998245	0.567554547574007	0.332004476317355	0.372724412442674	0.373135107069644	0.111789089248107	0.319508319595531	0.398490291677359	0.44927811527772	0.333333333333333	1.25616230348781e-12	0.528263680054755	0.483350288750094	0.474759123281201	0.506926251807045	0.440815670083811	0.0924158853082077	0.225870538983465	0.435290343165573	0.472548636926742	0.222501877844412	0.374486428777051	0.27044025157233	0.372720585276208	0.425305939427063	0.344195587641773	0.480539369158357	0.179415950062941	0.136398009016768	0.392906475902298	0.463975229912324	0.359163724201168	0.377221555776916	0.364573203861859	0.379114693580836	0
2011-06-02	0.180089681547472	0.175176107614806	0.233859239910565	0.900000000000001	0.290292053590109	0.398274912252114	0.170216329745376	0.126914734572094	0.288051029982287	0.382104400986814	0.532206890336103	0.318836926461606	0.376765308013054	0.352784349157644	0.111173288693834	0.280160850964129	0.386795932768796	0.430575733433327	0.222222222222222	1.25937378020589e-12	0.512726740443408	0.510577015823556	0.46391769841228	0.498171896589958	0.428879756464742	0.090921798086306	0.287680380779571	0.577513084273045	0.436690780598061	0.256851461394149	0.232114738984011	0.0999999999999986	0.274221895604171	0.370934466990659	0.217583161656935	0.458399172584337	0.176794349656104	0.15354056912398	0.324140084626914	0.35752114425531	0.353401652339372	0.373354337021908	0.356327542289898	0.373888276110011	1
2011-06-03	0.169594541604583	0.19355133674717	0.234538516464759	0.895238095238094	0.292425881187062	0.426248894145427	0.21490233380357	0.13669224532543	0.288711286516435	0.391330006759391	0.549852296791645	0.320517579379946	0.37070842480712	0.378255074556352	0.112586897762705	0.254752564773677	0.347814736406922	0.416535907194389	0.333333333333333	1.2596737908563e-12	0.465010739311849	0.530215591379828	0.453692043064344	0.489000526371075	0.414900693731628	0.0829875951820309	0.261464997690745	0.347387343927068	0.428865697766839	0.254659848728683	0.243799202839675	0.104761904761907	0.210275466044127	0.311664711605219	0.164233626454625	0.441271242998704	0.177654504950447	0.141218315430349	0.349844831326566	0.512952892982552	0.34869684136965	0.370008232850908	0.350919821733742	0.369662898831559	1
2011-06-07	0.168095235898456	0.203511035431936	0.235180660523531	0.813084112149539	0.323292628927873	0.458470063940938	0.282965682848492	0.149081864510894	0.297896185828783	0.410359083180595	0.570059034967896	0.333802967167678	0.36289424264453	0.428057371912439	0.118067610626068	0.292729601600967	0.341689119835771	0.416906596875305	0.333333333333333	1.2561100742679e-12	0.45846641586511	0.539973240494117	0.446434838970957	0.480124869492913	0.401511464856418	0.0773002676983	0.237652869515824	0.436430562345937	0.472333789451782	0.24111446016394	0.293393829496596	0.186915887850461	0.19730755152632	0.267482809741579	0.192121187463269	0.431031789604474	0.178877914910115	0.129213942137542	0.387056369193154	0.54074824541907	0.344890702158188	0.36592159742895	0.348566094915103	0.366916726553043	0
2011-06-08	0.156850443102505	0.212759327067791	0.234474031911903	0.887850467289726	0.299914850334881	0.464226046299761	0.274669907501379	0.159599458213094	0.305221159053662	0.402151242223826	0.563449590913303	0.332741770564935	0.35477677030668	0.34828108546729	0.124067203195555	0.26466554035256	0.342802868303253	0.398208186032156	0.333333333333333	1.26027128193248e-12	0.458913853933186	0.550749170287558	0.437663112083743	0.471164697477354	0.388413239799682	0.0763326228531799	0.222962730930615	0.375617483315196	0.41369070016044	0.193258243483949	0.315809506727072	0.112149532710274	0.161666660491333	0.225196711635351	0.173520777394771	0.420054009876669	0.179329069883424	0.111923799192126	0.384719332641737	0.476557862373711	0.339762986831637	0.362602920341319	0.345566749166908	0.363857338798684	0
2011-06-09	0.145355766022198	0.221347026443941	0.233945586856798	0.953271028037385	0.279721821055073	0.478796603246909	0.270919999606365	0.171844266679091	0.301731600441016	0.394776722634058	0.567092788177602	0.331290734475473	0.342208068631921	0.268347768510314	0.12926879951954	0.278695791820646	0.312174785447495	0.393312802980813	0.222222222222222	1.2605711325356e-12	0.42190331274889	0.561588594963585	0.426947898560665	0.46172488523108	0.375571809396494	0.0719420804163352	0.198708834696175	0.343131777977243	0.387945319925872	0.182793476682281	0.339963081333539	0.0467289719626153	0.114284903614451	0.179947515336734	0.135594725045631	0.409003486997003	0.178100000190356	0.100442982866311	0.390732169563234	0.480538370818029	0.335111038906518	0.358187159918935	0.342315765115981	0.360643248777629	0
2011-06-10	0.14210727032559	0.233766861133124	0.233305719920048	0.940639269406401	0.276759247281923	0.484632393213033	0.291094013972893	0.185417084934312	0.298443415653995	0.39822858817942	0.558785873853708	0.332178477826802	0.336436635002702	0.271861675683388	0.135332754923815	0.289892111612243	0.335563503264619	0.415535005952289	0.222222222222222	1.26052188875038e-12	0.449342541093725	0.568779291274811	0.41771149094616	0.452214874465977	0.363750524405758	0.0703298433258199	0.18778485599818	0.464121395956066	0.39793210896117	0.182998577358647	0.353177959362132	0.0593607305935995	0.087257968634984	0.14005109935868	0.130913383334194	0.400551279897343	0.17765353500805	0.0997978119548264	0.409504967766368	0.506456567477869	0.334212367148256	0.35473134741446	0.339969668098392	0.357911973819591	0
2011-06-13	0.135110510363664	0.254273347454265	0.232590022512274	0.910313901345295	0.24426116838568	0.522564034117521	0.278816938929499	0.205710638134531	0.300002993584821	0.382808832576599	0.547077372848564	0.33143941399617	0.325527108992603	0.17147489372007	0.141075483340404	0.276032143067594	0.308833540045048	0.42709365696525	0.222222222222222	1.26081590603185e-12	0.416069157975057	0.579100097466662	0.406130968890795	0.442151741824589	0.352113582162606	0.0690733853727895	0.186104781023614	0.381492099270575	0.356323639874599	0.156854160006344	0.335010895515869	0.0896860986547048	0.0801894818333632	0.110908679539618	0.152203720261768	0.389943922562601	0.177996243794095	0.105729498940293	0.386459723675891	0.462599595451132	0.332097845364111	0.351193253659879	0.336439085933317	0.354560079959558	1
2011-06-14	0.131862014667056	0.251163502984331	0.233816313973645	0.820627802690578	0.298098847720301	0.444046459857209	0.329193931051205	0.216416655973095	0.299765115272515	0.407076725961599	0.581423961558221	0.333724271065416	0.321976829882202	0.276480020838508	0.141937843591537	0.284438857724703	0.340575371368289	0.436115827686171	0.333333333333333	1.26062806066152e-12	0.455233239636792	0.578966173332013	0.398823142915831	0.432551942936305	0.342855449775911	0.0676451561036971	0.226936103894671	0.457472966755571	0.397970057706046	0.159689828408714	0.382343572489756	0.179372197309422	0.10785978926988	0.101442312866721	0.217546143167587	0.386788865413443	0.177704358433265	0.129749772933249	0.420993884460388	0.554654456511151	0.330300501847587	0.348285982822781	0.335873107659644	0.352833270754905	0
2011-06-15	0.127364097548675	0.248275790262252	0.233074882867255	0.924623115577893	0.259413628246647	0.448477306946	0.302927226553498	0.229478755696202	0.289094924382445	0.387172501461591	0.559560905287607	0.333477202462424	0.316820896902776	0.174191681445284	0.140378979569716	0.281779336163725	0.337234125965841	0.449119342723743	0.222222222222222	1.26082636675651e-12	0.4496911164288	0.584606201246095	0.39060470029288	0.423129756125753	0.334323192667928	0.0671889633867255	0.22344234828211	0.397584545435245	0.36380019829218	0.146913886048195	0.367422491940314	0.0753768844221072	0.0887574532193903	0.088254144814122	0.196173116239391	0.379822817412434	0.175692514611185	0.118728638578843	0.398271238811909	0.455895950329851	0.328027390929632	0.344446191151142	0.333261109848392	0.350150865100062	0
2011-06-16	0.121866643292877	0.256897186385068	0.232310710562342	0.980487804878038	0.218789695736267	0.359857373050742	0.281648252294341	0.247961457630505	0.278036898617557	0.36774140315767	0.546919847265497	0.329343492061715	0.31030907843395	0.187180765139579	0.143713024305063	0.311243002524393	0.322755395888576	0.456186773283574	0.222222222222222	1.26081890663378e-12	0.430045939684294	0.595818080107525	0.383400271480787	0.414064634577036	0.325223166704677	0.0648483117745434	0.223784673037207	0.400634289893044	0.366466581121336	0.145037748627329	0.313926242199731	0.0195121951219617	0.0558517032564533	0.067615246259718	0.156853747813254	0.368986500078433	0.174171910427256	0.123408175852309	0.372402392996707	0.445921330400286	0.324961334342622	0.34044183697929	0.328927550378142	0.346483477922533	0
2011-06-17	0.119117916164978	0.267414067591152	0.231469709421913	0.978835978835983	0.208071326202978	0.309650019973316	0.29043239926581	0.257208917300639	0.267431778339448	0.369911954643813	0.561635958377265	0.330388966764464	0.300327263548177	0.193977497229534	0.144840252904786	0.304412609657329	0.313288533914978	0.443905609367291	0.222222222222222	1.26080749049339e-12	0.417891400505996	0.604645182535246	0.377022762298097	0.405460476008989	0.316171266733558	0.0631982532397905	0.231822516910591	0.448947373787831	0.372905696334935	0.144858796059964	0.301023040060861	0.0211640211640172	0.0345109554085136	0.0461728466302706	0.14105012554273	0.359758219430298	0.172566042284832	0.0859131181236242	0.376518225619574	0.492673538770239	0.32157809948799	0.338220243226414	0.325323413463425	0.343076628650405	1
2011-06-20	0.115619536184014	0.280325496225172	0.232009006817284	0.864321608040201	0.24652292771379	0.366472051202368	0.326510304545337	0.261203876744548	0.27391985334977	0.391224230862331	0.559259586516875	0.33297188026639	0.29312858203538	0.198130919018758	0.147123685235659	0.304232870674984	0.333336006329655	0.446450564782483	0.222222222222222	1.26072720466255e-12	0.443367108212446	0.604934460345153	0.37288132065015	0.397699144444812	0.308929974689285	0.0625257254243151	0.214442783157536	0.450939086650518	0.384367306580207	0.151903933743863	0.312448449657415	0.135678391959799	0.0616310756587658	0.0416417473829025	0.199380375413034	0.356557501299381	0.173827561281083	0.0945397296895546	0.409022803162653	0.540212882800644	0.320045071194485	0.336327774473963	0.324082688580592	0.34094937863393	1
2011-06-21	0.109872197643862	0.274614395683641	0.232861359282427	0.721052631578946	0.319079785298359	0.374876180012673	0.374250430155824	0.245569696569703	0.288999587203261	0.426289190053856	0.579721622736991	0.335529764060347	0.295001844882576	0.192802564242912	0.151507171008194	0.335655844674674	0.38846655547002	0.449061871317716	0.222222222222222	1.26060432133796e-12	0.513979316589501	0.59469846435472	0.36976755671069	0.39082994689263	0.305351069109465	0.0606323128516062	0.228537067367344	0.483623852134465	0.397317420837349	0.164424202630035	0.38971479018433	0.278947368421054	0.131440761719797	0.0637540216603714	0.308879687447769	0.361089670632196	0.175460143293754	0.0952609465630419	0.449482149929388	0.568832605901761	0.318829221168601	0.334764430721939	0.325579604779328	0.340529245578256	0
2011-06-22	0.107373354800316	0.264783799411844	0.232193496074356	0.677215189873423	0.315470002131814	0.375571206652124	0.379650069442859	0.233396985980393	0.29398506852019	0.432105013156414	0.571858883148774	0.334790746239614	0.297330042992663	0.259844597970279	0.157657884459905	0.344616372300023	0.386795932768796	0.459989202041302	0.222222222222222	1.26053277697303e-12	0.511781669148426	0.585585287531743	0.369620641051304	0.385303442054226	0.304546777328763	0.0577890201268995	0.225391506721276	0.455915837377972	0.410849524731101	0.163029854666215	0.427831656135932	0.322784810126577	0.193808777342613	0.100949381552011	0.385717616928076	0.365458877551321	0.174908597998563	0.0940126616557663	0.452855268001681	0.506376295201084	0.318829221168601	0.333585066137079	0.326398774594846	0.340083935410076	1
2011-06-23	0.0968782148574284	0.241852155054418	0.232922670721458	0.273504273504275	0.404598960293487	0.378119803272583	0.447099044623135	0.206986338013377	0.305789117396431	0.473374290630751	0.576575125051073	0.335023678275906	0.297374644489024	0.377296655109589	0.167414082727127	0.37238820447786	0.397933417443618	0.490854752826361	0.333333333333333	1.25037686055451e-12	0.526652960408872	0.566292708835865	0.367466803893477	0.380425614782925	0.308178415448457	0.0557718763807396	0.229714212120951	0.33062508017408	0.483234016474089	0.128211601270164	0.502429464533228	0.726495726495727	0.381153880030309	0.193194604610411	0.639977559541636	0.37767874282371	0.176354488065374	0.13127355355924	0.49598921543295	0.585251517091792	0.322159592978629	0.333722201553923	0.329984051193701	0.341446194720793	1
2011-06-24	0.106623701947253	0.230503164418291	0.234341672111939	0.138888888888884	0.490288707802607	0.437590633819953	0.535012442177833	0.184956425182442	0.32042834044411	0.516190888862727	0.593771775106614	0.340041911840974	0.30550995742542	0.491521816727095	0.17357839042595	0.420285015055775	0.428561500299376	0.534235966509176	0.444444444444444	1.26436881016028e-12	0.565945316491792	0.538535531166504	0.366242298350593	0.376263752149274	0.317337436151399	0.0562225807076382	0.294377725684763	0.598846304574076	0.509699117662213	0.148080914276122	0.638234080491727	0.861111111111117	0.554655700257959	0.317155853319363	0.829077376660807	0.397009385256063	0.17797277373829	0.178792300460616	0.528402086831274	0.594142701968001	0.327974527885028	0.334983847388889	0.335860334773872	0.34454128686627	1
2011-06-27	0.109872197643862	0.23128769199856	0.235576532110297	0.247191011235957	0.510371898880965	0.467323810718103	0.569874222648662	0.168043570280171	0.316249091399921	0.528771442709904	0.590524451757491	0.338940163015577	0.317231230669305	0.521168343499912	0.174423450287979	0.411834502117826	0.441926481909161	0.567077515434586	0.555555555555556	1.26476695506776e-12	0.583085398599005	0.514068137622211	0.366639289208918	0.373018425933326	0.330418472604761	0.0569062400007255	0.329279387394127	0.585871202860627	0.506807980697464	0.147030726427648	0.696880547211642	0.752808988764044	0.631219328778287	0.427361259255538	0.845727606531816	0.415217923396659	0.1764090934393	0.210680299433832	0.512210074187873	0.531831141375142	0.333630873657616	0.33712315989166	0.340671728745509	0.347581459689347	0
2011-06-28	0.11586942046837	0.225198588367045	0.234668719800936	0.275280898876405	0.49807963829591	0.441899700280724	0.57034562596185	0.155803108796717	0.311290746141958	0.526500656702464	0.553640792077223	0.333638302122175	0.327908828898323	0.509889247021673	0.174954369712458	0.428332889215683	0.440255859207939	0.590422239684885	0.444444444444444	1.26366783800337e-12	0.581030282525221	0.496886532428026	0.364496600570036	0.369967905097369	0.345145243971716	0.0577989233323084	0.331585359404741	0.522646613695432	0.514394842777099	0.14348005443337	0.637513223326333	0.724719101123596	0.672119434688588	0.515556458619566	0.819331855514313	0.429031464366951	0.175964889527875	0.207038274933806	0.478929564261806	0.500306503751134	0.337648465047491	0.338576795310208	0.343432388934173	0.349814961465293	0
2011-06-29	0.123615833283359	0.209789013219669	0.233530349908753	0.505617977528101	0.405557683507444	0.34972692066663	0.481577030644808	0.136949871034214	0.294083088524971	0.490677676762232	0.550545654537561	0.328412440638016	0.34077190044907	0.481052401338085	0.171991834028929	0.419945583853857	0.429675248766858	0.598920105001873	0.444444444444444	1.27037552929125e-12	0.567938109124379	0.495828798317602	0.362682373812766	0.36714286399759	0.357549004149829	0.0588480069252137	0.351998400026455	0.60366352003172	0.496351844095323	0.161942352138151	0.553637640037111	0.4943820224719	0.616219204515437	0.554227958088794	0.663800874619709	0.431374159731418	0.173399514101353	0.229748095863228	0.410126893640972	0.423420445541415	0.339604397697826	0.339591597394856	0.341607955562041	0.349560290722641	1
2011-06-30	0.129363171823513	0.197007751196474	0.23474282250755	0.258426966292143	0.498386907090904	0.404714319389362	0.624640577626619	0.120202208271627	0.297618427544554	0.536693053120118	0.569529580799712	0.333537904331453	0.351708187356986	0.560324838195997	0.170498316776684	0.462206202852557	0.443040230376642	0.594506414172151	0.555555555555556	1.26332400009178e-12	0.584590705841146	0.48172171980204	0.361989541031635	0.364735947376161	0.370979539483064	0.0603693817209639	0.373769553898906	0.583560290996002	0.528326261721963	0.181151572713374	0.583276958747392	0.741573033707858	0.668204739708636	0.598724882405285	0.711608438627057	0.443332780857296	0.174983586335891	0.252744995016885	0.454596264884519	0.604488396467239	0.342088960794196	0.342608576565429	0.344324701620651	0.351586352449203	0
2011-07-01	0.126864328979969	0.185139436460651	0.23364925233734	0.337078651685395	0.467987306421548	0.434138818138956	0.57804678905271	0.122648900955568	0.293846437706461	0.521445650457265	0.567628406304916	0.336314840085982	0.366060948886218	0.540817979471948	0.165551772707865	0.439753362172174	0.449165846947795	0.56677093240413	0.555555555555556	1.26303612843784e-12	0.593075618587399	0.475218484797263	0.36260457394926	0.362940803891123	0.383486780400181	0.0573073469399831	0.382119887407625	0.549827696859871	0.534266076643683	0.177043811693071	0.562750627999621	0.662921348314606	0.674463286481661	0.630642711736321	0.685398804073221	0.449984323348189	0.17387082664791	0.249436687440062	0.426294487383786	0.481287583810273	0.341771782526574	0.345460993235789	0.344884445440926	0.35253308473072	1
2011-07-04	0.128363634686096	0.189424750063307	0.235311870619728	0.00552486187845679	0.577384353094363	0.512400568860411	0.724635591038704	0.138036097400829	0.319137397810443	0.579195223478316	0.578643388401862	0.340718310302318	0.385667766686872	0.559309311953767	0.160782032186671	0.46673710439643	0.499841402218229	0.551862150478434	0.555555555555556	1.2625123772552e-12	0.657768828287621	0.452572490521981	0.367590567965255	0.362561742805863	0.399000740556858	0.0608973598391858	0.428141246238963	0.531089772294216	0.562304031198238	0.205451047598223	0.614583901435798	0.994475138121545	0.798348566542819	0.696522663085223	0.847658380787653	0.468931186634985	0.178229344777747	0.280759911976939	0.502061701029765	0.639519817327036	0.344203482578341	0.349657336991223	0.350799611813879	0.356456197035258	0
2011-07-05	0.126114676126905	0.193403969837202	0.234474250942866	0.088397790055249	0.544060523368356	0.484499921146398	0.657917714040124	0.152069992360294	0.328069548231901	0.561286812759571	0.57123395208767	0.340961416908939	0.404248750071204	0.621049653367557	0.157096812127007	0.456648554596286	0.495943282582043	0.542153598644839	0.444444444444444	1.26238229773423e-12	0.653576751136669	0.440617297156011	0.37153846526553	0.363095466353993	0.414484956730154	0.0616110079742161	0.40695578541498	0.502497375361423	0.56999678867297	0.199526736272142	0.599659075872796	0.911602209944752	0.851016127851709	0.759404099574472	0.874670493788672	0.480511475670555	0.178138430870433	0.249831279804535	0.472916443286267	0.480128485011658	0.346106552184071	0.352729170328534	0.353402248685232	0.358904279137441	0
2011-07-06	0.126614444695613	0.184568735246133	0.233566673048942	0.176795580110498	0.50914339500819	0.484889680627063	0.605674011085682	0.159092528007116	0.332595782143374	0.542446768575598	0.556556415888383	0.330548647784372	0.420162563973099	0.611029392252394	0.151505816712542	0.416176452634006	0.479793929803552	0.547504094083082	0.444444444444444	1.26224316687399e-12	0.632707325789165	0.436857489788691	0.373819014169572	0.364005932067058	0.427956407428358	0.0623446395234924	0.394694056224457	0.510335122724886	0.580084860580648	0.190407008037797	0.557157920232059	0.823204419889503	0.854210368299182	0.802475053350616	0.829063795753272	0.486032997335116	0.178600182718449	0.254203618230152	0.445173360470595	0.477759818730557	0.349331197904893	0.355417024498681	0.353707145397031	0.360094735876381	1
2011-07-07	0.132111898951412	0.186127091735054	0.235051736604219	0.180851063829792	0.5183976793274	0.479002830873644	0.601717910904393	0.168286701574309	0.323269442655198	0.543596785651004	0.573352679065875	0.332318553297939	0.433855223356175	0.690446886565139	0.144202960791254	0.38945580537551	0.46809957089499	0.541515997567782	0.444444444444444	1.26215428359223e-12	0.616778874558018	0.433277514435071	0.377451439901983	0.365504395628025	0.439701343978022	0.065837090475956	0.424907429451386	0.572504203550173	0.589239271922676	0.187248624122576	0.575843841183139	0.819148936170209	0.854875563241114	0.831428507198629	0.795516114736773	0.491280428774287	0.177037661145181	0.229920454958603	0.436548131459102	0.521165716722416	0.350494184886172	0.357309493251132	0.354357345663992	0.361322658287539	1
2011-07-08	0.139358543197693	0.193405666125092	0.236236796750528	0.154696132596686	0.560299246826685	0.49035574528657	0.632066173349522	0.179745007252258	0.318811628577262	0.561299545001176	0.573809006289357	0.336017597264144	0.447984977403598	0.74203809377584	0.14311819522785	0.398985713070094	0.482021426738517	0.556374417060268	0.444444444444444	1.26212485661449e-12	0.634045431178771	0.424910533642999	0.386040917986276	0.368524175403956	0.451174242868759	0.0678274978783455	0.427489369781945	0.606777646021966	0.595044688100282	0.188503248265167	0.606239685067097	0.845303867403315	0.864762691998399	0.854290391411819	0.787279840656188	0.500090456581376	0.17714854437207	0.200935843923356	0.458425916394932	0.558047548671157	0.353613104517786	0.358763128669681	0.3568467171538	0.363495318897805	0
2011-07-11	0.137859237491566	0.200164342344414	0.235525880749556	0.242424242424247	0.530932080862509	0.459727202531165	0.591563407025407	0.183581693939413	0.309204986262369	0.54378181446924	0.564639755138552	0.334604805492242	0.453515562952464	0.688353418838248	0.144476493269179	0.393862897435183	0.456405211986428	0.542240492230709	0.333333333333333	1.26233832937399e-12	0.600959648738134	0.422875635096809	0.393260561713132	0.372470596957004	0.460868374041098	0.0678100417777822	0.397111460672237	0.45493756558924	0.568337894554747	0.189804909597383	0.581495905503574	0.757575757575754	0.839678443071254	0.860500771723049	0.730898046218441	0.504103537024461	0.175908445752538	0.159572435523719	0.430394077598192	0.486240238335082	0.352820158848732	0.359613368254115	0.357433652245179	0.364663560661342	0
2011-07-12	0.143606576031719	0.184297942475356	0.234448338784344	0.484848484848478	0.441934780438528	0.428237247102936	0.50356270208426	0.182929949517571	0.294569597258439	0.501813335405758	0.549764925284706	0.32837521404136	0.452079394769614	0.622932159801806	0.14857238023242	0.39536570689223	0.412412147520885	0.524610812501544	0.333333333333333	1.26300404172737e-12	0.545291812681849	0.433253345656928	0.396979334015029	0.376416131060504	0.466064861190776	0.0672669827428065	0.398259719797938	0.558355837126194	0.543322591213281	0.208859458456717	0.450011123113762	0.515151515151523	0.735424374943869	0.827107290574073	0.567817722546625	0.498384378814398	0.17401653163595	0.135129378188308	0.386778061722641	0.427553211650192	0.350705637064587	0.35950365992064	0.354249455966677	0.363588096015306	1
2011-07-13	0.148604261718807	0.185644276532722	0.235873795104777	0.199999999999997	0.541560880054461	0.496955225124272	0.602023055575436	0.18489683953984	0.298706028157084	0.548494337362318	0.582997574651082	0.335945990543156	0.453604765945188	0.641758616061596	0.151840930124647	0.4020081451454	0.436914613805492	0.517290217163991	0.444444444444444	1.26273549391411e-12	0.575654145470017	0.426633136611241	0.404230306076941	0.381109797826974	0.471723951950788	0.0697642421099038	0.422758894374506	0.588447063008492	0.555718403057912	0.221167052586929	0.579778387737804	0.800000000000005	0.768770864582363	0.816850432207868	0.64517856298669	0.505113359014221	0.175524364481343	0.143775059095956	0.459820510263979	0.62269232625983	0.352291528402696	0.361999524507204	0.356953565005895	0.365450423797696	1
2011-07-14	0.138109121775919	0.186894443871705	0.236948414283544	0.180327868852457	0.548232198408142	0.55131182874893	0.599622011793587	0.17670745426096	0.309126366946294	0.544199262755066	0.568688221699997	0.3401428600147	0.455103376222945	0.634655133524133	0.157662510963822	0.415866111598587	0.441926481909161	0.518871474335149	0.444444444444444	1.26331958523403e-12	0.581880591022124	0.421442438800714	0.411905349128901	0.386491875727484	0.477423555812924	0.070897630686526	0.417874894087402	0.439805528305412	0.531182149264621	0.210947259275021	0.591592726402556	0.819672131147544	0.798104802195529	0.820573382926521	0.697891673991193	0.51084464219168	0.176928333862157	0.12317890888391	0.457368923925432	0.518939532525027	0.353824556696201	0.363398305759016	0.359113852999315	0.367177276410364	1
2011-07-15	0.143356691747363	0.204444796091798	0.238599994732857	0.129629629629627	0.61257467765242	0.616703565701952	0.673587829921285	0.168346940000183	0.326139390726816	0.573388968490234	0.583919566668193	0.339322981859545	0.46316732676516	0.646344314592555	0.159000171826576	0.398782595194459	0.487590169075928	0.516007804613379	0.555555555555556	1.26277993969349e-12	0.638561252011997	0.407361465671033	0.42133550631404	0.392796774817589	0.48536510514884	0.0738569174647462	0.451009084799683	0.528954319022657	0.551189076377203	0.220850344040268	0.672494918652368	0.870370370370374	0.83596618861325	0.836686273625836	0.752320167478012	0.523508443814035	0.179086092095589	0.181689624362116	0.498149918013562	0.593040877987047	0.356309119792571	0.366305576596114	0.364218918492835	0.370672237107336	0
2011-07-18	0.136609816069793	0.22074155172474	0.237730487787307	0.160493827160491	0.600411790972529	0.587856384326663	0.653230566521635	0.154344979215608	0.329979878361027	0.55875658166977	0.574252626551937	0.338557453113335	0.465709612057784	0.70618994183841	0.158746780495221	0.406381617897905	0.460303331622616	0.531786015185174	0.444444444444444	1.26277993969349e-12	0.603941136909111	0.399545543877991	0.430967558304823	0.399882733488331	0.49360871053184	0.0750624562012699	0.426204105608228	0.476620366537357	0.55137475152457	0.22079703141724	0.671127153565985	0.83950617283951	0.850063089852354	0.852503392169088	0.760770028763967	0.531718296372056	0.178808518858136	0.154949997444397	0.481161455880951	0.500885531001041	0.359163724201167	0.367375232847499	0.367175359696088	0.373277838052834	0
2011-07-19	0.133361320373183	0.219516371703438	0.236766297664104	0.4313725490196	0.508990433915076	0.53260447974744	0.551297293746352	0.135797474998884	0.321334519897435	0.51398265654398	0.552575473524948	0.329147075216107	0.466200228517764	0.711820447102347	0.156305340908615	0.389095434890965	0.445824601545349	0.553059186548645	0.444444444444444	1.262760887412e-12	0.586918869440095	0.405752000245063	0.436585889646946	0.406742612554129	0.498593353082736	0.0754707564122163	0.412174759647853	0.457348528850958	0.553545973278663	0.218268905742932	0.539396217907427	0.568627450980401	0.761655833572045	0.831219600508873	0.614013221338699	0.529094467841723	0.177313495112104	0.160405777494821	0.422292439760525	0.430347380946097	0.362018328609763	0.367759212014663	0.365570834158835	0.373378394555674	1
2011-07-20	0.127863866117384	0.213457624363163	0.236766297664104	0.481751824817509	0.508990433915076	0.538926980628277	0.545207181808759	0.114032362386042	0.315586432404927	0.507738609202979	0.561214581902388	0.329532011418337	0.460571519676904	0.655784889221338	0.15759616641465	0.385350999514486	0.411298399053404	0.546210717342238	0.555555555555556	1.26369468712773e-12	0.543906742646455	0.411462987364569	0.443135705643579	0.413619106974245	0.501048014585965	0.0753743869518557	0.378480599490362	0.383586503426885	0.522968885375282	0.20436572229374	0.513709443650063	0.518248175182492	0.684527401668056	0.789262491088306	0.514126933525839	0.526407873955765	0.177120095762271	0.167228582118365	0.409908371232532	0.510803330614803	0.362018328609763	0.368582024515728	0.364501150467333	0.373460668057998	0
2011-07-21	0.129613056107866	0.197865734347319	0.235935662538721	0.809523809523819	0.433480408612215	0.476149005537511	0.415318866294357	0.0936508282621052	0.300438912642444	0.470552204931088	0.553528743256288	0.330299198451279	0.453096308886663	0.666888999012424	0.156735271039669	0.342362860675256	0.399604040144841	0.530590594334803	0.444444444444444	1.26583502228396e-12	0.529375263354574	0.426445997154323	0.448799863723686	0.420321130119126	0.499175635878393	0.0757448018496937	0.364539721392831	0.440271779126139	0.508835414317859	0.214519490096912	0.382938510082861	0.190476190476182	0.514761014070355	0.700171488558205	0.290344915652603	0.516190675385668	0.174981784760574	0.15744225292694	0.368244108466085	0.436642121964411	0.359903806825618	0.368280326598671	0.360570090300853	0.371699813807133	1
2011-07-22	0.121366874724167	0.182446485257893	0.236475144152188	0.785714285714282	0.439832821707277	0.429772331943612	0.416482934590292	0.0873177248209598	0.290112640734269	0.472374684409005	0.560886218108077	0.330442497596518	0.446111714556404	0.597447759082214	0.155883027076697	0.353119551203439	0.410184650585922	0.501889922087534	0.444444444444444	1.25803336004429e-12	0.542504123256932	0.437544692426223	0.45462832949104	0.42691841023051	0.49478508814375	0.0725338251830352	0.331296696313024	0.306958525443266	0.468606383717644	0.177722461237414	0.372657132890958	0.214285714285718	0.410180240111795	0.603126130968332	0.203230780336885	0.508330241639517	0.174103467618099	0.131114154268276	0.380759799873481	0.517048755296661	0.355780489346535	0.367430087014237	0.358217544998656	0.370411462285824	0
2011-07-25	0.127364097548675	0.167970317692283	0.235608909836036	0.917241379310341	0.373567713554441	0.434449297816933	0.298292202752371	0.0913110713227927	0.28039803628319	0.440952493590149	0.54262393116001	0.330482420652682	0.435996095181545	0.533209329326024	0.153745159138279	0.357250097696464	0.38846655547002	0.464045790826376	0.444444444444444	1.25915294908608e-12	0.515149776182553	0.455764331688035	0.457444763439412	0.432793331292495	0.486693211162373	0.0711880357019689	0.330202458609706	0.488642872706883	0.455680206366792	0.185928282241937	0.276254441057175	0.0827586206896587	0.292969716992107	0.496230885290657	0.103345961828494	0.494633075970029	0.172859089305302	0.163387530727882	0.3585795060611	0.439306117716453	0.350124143573947	0.365976451595687	0.353610018075349	0.367630752501888	1
2011-07-26	0.131112361813993	0.152688086557324	0.236370408319259	0.668965517241381	0.450768472975926	0.469981073819549	0.428889892769131	0.0907802321328226	0.287649047423309	0.474425192457314	0.56960897022133	0.332766386771489	0.42615700508413	0.597261758719415	0.153560549218817	0.344563414584629	0.395705920508653	0.443843107935788	0.555555555555556	1.32789359686445e-12	0.524643286681361	0.459594408155516	0.460590014217933	0.438160075797872	0.479089992414317	0.0706538688827392	0.321574279718699	0.455870905981774	0.490878710608231	0.197997066321492	0.345402387963247	0.33103448275862	0.304473426681025	0.429108974156983	0.206554479245323	0.491232473489976	0.17434682231808	0.184770941626903	0.425901205227219	0.586457474175072	0.348485389191235	0.366607274513171	0.353756271165291	0.367183795249615	0
2011-07-27	0.126864328979967	0.136574796233813	0.235710724684701	0.703448275862068	0.440648404900669	0.518185356890749	0.397479605586486	0.081307725760743	0.292564165399238	0.467059813136077	0.574058926678622	0.335082054913156	0.418788837885157	0.570284816774258	0.151434966344661	0.338127345575449	0.399604040144841	0.435034318778893	0.444444444444444	1.24708867139612e-12	0.529375263354574	0.464014495976899	0.463329682950253	0.443034293795576	0.471778279516001	0.068906267016295	0.306747267202447	0.356189200621282	0.484199130883916	0.197969766841861	0.382943933256786	0.296551724137932	0.299692002802058	0.382639616687818	0.253156460949537	0.487318714961533	0.17434682231808	0.152005226139101	0.427308147368591	0.500400975271026	0.346582319585504	0.365619899511893	0.353406837432824	0.366564190600274	0
2011-07-28	0.123865717567713	0.134135078414968	0.234885210963009	0.912162162162172	0.376890462843156	0.481946532606654	0.274493755525498	0.0849068043935023	0.294405328021423	0.436639184704285	0.550726976225947	0.330242752824807	0.41389159358463	0.488733813848427	0.150575140509176	0.286809106710918	0.403502159781027	0.436403564404989	0.333333333333333	1.25946551771537e-12	0.533967653283831	0.476675044272445	0.462203988444702	0.446695015772284	0.462801995639084	0.0674935461681567	0.309565906832669	0.42670882829821	0.446769450556983	0.200606285451847	0.307751519829682	0.0878378378378283	0.221144826497597	0.323381351183527	0.171325426964419	0.477121493630487	0.174048155830758	0.158487765979719	0.396435116994553	0.441296226501389	0.344837839113584	0.363617722425967	0.350224105381158	0.364381419818355	1
2011-07-29	0.143106807463008	0.127574100126689	0.236263253915052	0.573333333333335	0.476781485526973	0.519217075647514	0.457985561833601	0.0799066732212327	0.301371234069092	0.48139785054239	0.601601905824023	0.336513468224459	0.407611702896886	0.572219768303353	0.145891081961236	0.324656361665799	0.400717788612322	0.458130706988918	0.333333333333333	1.2198828334497e-12	0.530889564721897	0.472172887867974	0.461710351419601	0.449518940030053	0.456521833281994	0.0685321077657897	0.357999793344739	0.587119671334501	0.488199926082184	0.223549370334133	0.439260278822647	0.426666666666666	0.291119729600536	0.309068329689118	0.324983652315552	0.479462684884852	0.174867232870924	0.188710271398083	0.462862066529249	0.613480953211896	0.345525058693431	0.361834962006991	0.352482254779171	0.36508385750118	0
2011-08-01	0.145105881737844	0.121481763144715	0.235349327903387	0.666666666666661	0.449353180646734	0.42410641353666	0.404073969493336	0.0805296363296334	0.302251883521686	0.469719662289593	0.567647056639833	0.337792622801436	0.402081117348022	0.579362343655722	0.140717680555661	0.342393846877557	0.390694052404984	0.491436049912371	0.333333333333333	1.26683591429788e-12	0.51847820741283	0.472747865023647	0.459945569044375	0.451403937442047	0.451269605776274	0.0657987600064469	0.35890839798356	0.457564197814816	0.505349514401527	0.211658390481739	0.424382141344203	0.33333333333334	0.30407013933142	0.304188744861727	0.356106032286413	0.478272352987857	0.174407991780591	0.208996830414433	0.443048407729664	0.481797767463796	0.347269539165351	0.359805357837697	0.352736267492382	0.364947624656002	0
2011-08-02	0.138858774628982	0.105083883333411	0.234497102689828	0.799999999999989	0.411245137968326	0.443650184657088	0.339330782524045	0.0860051086067169	0.308310021837031	0.452524121671705	0.54593741336985	0.330304811620013	0.391082388345199	0.487562833267209	0.137616471010177	0.327930062163746	0.35672472414678	0.493295649537834	0.333333333333333	1.25914722738242e-12	0.476998612250908	0.478771295814887	0.45749834076644	0.452393111701895	0.445598584416123	0.0658520823293347	0.355140568899735	0.402750294588574	0.455338374732048	0.186737578565821	0.348643999823493	0.200000000000011	0.264561566288566	0.286711741703552	0.300107621525454	0.473054038965373	0.175297406867453	0.218078796897089	0.411319929834312	0.468910588287495	0.346053689139468	0.358324295335779	0.351117866131479	0.363820512010936	0
2011-08-03	0.141107733188172	0.0894340635414033	0.233873175519325	0.893333333333333	0.385351278347332	0.425919974645253	0.301498248141733	0.0921001560332504	0.308723252285844	0.440924879340753	0.563770358933087	0.330664287698716	0.379521680488217	0.412967274256132	0.138138159518714	0.343303790420297	0.35171285604311	0.494203042511959	0.222222222222222	1.25966832023057e-12	0.470404544868232	0.487085232144716	0.456712117925177	0.453017768245154	0.43907640748845	0.0648165219267295	0.333785156135168	0.398159086394396	0.443223255391124	0.187052802429582	0.343228060439482	0.106666666666667	0.204522991922249	0.253445212134737	0.223083265706478	0.465992391743401	0.17492118429747	0.21140805971825	0.399992790926415	0.481152370845677	0.344362071712152	0.356459253666697	0.34878751167208	0.362187374352029	1
2011-08-04	0.129363171823512	0.0799492596333114	0.234378765398928	0.867132867132858	0.392314240970589	0.42954365778327	0.323217148227212	0.0954564544047596	0.302125728466244	0.445652847400946	0.577385668302807	0.332307726275955	0.370592460916582	0.345994912867431	0.137445627766509	0.343349441365756	0.375658448093975	0.503016470910621	0.333333333333333	1.26038994954204e-12	0.499420690783862	0.492136811088819	0.45374996482284	0.452889503374889	0.4326351765232	0.0612406306274227	0.306231333730801	0.297832718018552	0.418483348561133	0.166227916879669	0.384156116977483	0.132867132867142	0.173957382285007	0.220263240710705	0.203421787255082	0.461173648455508	0.173715576935938	0.197852183634721	0.411183454648855	0.517180017195595	0.344573523890566	0.355663868249001	0.347502103507936	0.361003518224139	0
2011-08-05	0.135860163216728	0.0802973351881234	0.233287480702312	0.99319727891158	0.29154672166041	0.367410023017592	0.184062721080983	0.115866227721893	0.284370941197198	0.394696475838812	0.542397298817144	0.32738033285	0.360334116753364	0.254121879476378	0.137886888857963	0.323945937075653	0.342802868303252	0.474765984245592	0.222222222222222	1.26059208943804e-12	0.456723439681843	0.512580025321443	0.448561074472118	0.451686822818163	0.422780887423348	0.0608982724579497	0.336133298334071	0.518987030960433	0.381367198841959	0.191804244703903	0.214378583003921	0.00680272108842001	0.108062692611943	0.174418403268871	0.130117152030444	0.444885463999415	0.170933883408262	0.198661210900144	0.338837848728238	0.383029129155541	0.339075767251789	0.353168003662435	0.341371322381195	0.357038742911055	0
2011-08-08	0.143356691747363	0.09651940824175	0.232187060089286	0.875000000000004	0.249668049554403	0.374751880574812	0.176631552071895	0.145393991542932	0.273329684382904	0.37210356248365	0.535881737489531	0.324323057330471	0.351627904663538	0.253205801131507	0.132632564248135	0.276260159108239	0.3461441137057	0.436779742053043	0.222222222222222	1.26056554688101e-12	0.459130660107961	0.536150434930499	0.438753046055239	0.448645331161036	0.409548184380759	0.0623202873501064	0.360487427648037	0.504092592617782	0.385611627670928	0.188940362609818	0.186364036944442	0.124999999999996	0.106809959156556	0.143404166985058	0.16499937692002	0.425838901135847	0.169912375028332	0.224231420194867	0.326202841130562	0.443845880045902	0.332732201899354	0.350781847409346	0.334602520208801	0.352271361724561	1
2011-08-09	0.151352988846706	0.116619182876774	0.233377755612606	0.781818181818195	0.257443214111926	0.442476878624233	0.239085736862628	0.175577294889765	0.279877478252261	0.379348929600691	0.547486374947891	0.330340133970405	0.346079478516128	0.241552812831124	0.127234885631942	0.28188770576181	0.346144113705698	0.417511527309064	0.222222222222222	1.26054249170772e-12	0.459302086693793	0.5519616288731	0.430681319434469	0.444500894603819	0.395375991607959	0.062733391687646	0.386694201405124	0.580328113658296	0.387787953354425	0.189718842922842	0.22433708169494	0.218181818181805	0.139619622168512	0.134540202587177	0.239637237269708	0.411937582265629	0.171242747655275	0.235233859113997	0.358366180876995	0.517561760104894	0.327604486572803	0.347490597405084	0.330358146902661	0.348523124528645	1
2011-08-10	0.150853220277998	0.127388602969439	0.234182073132628	0.754545454545466	0.273718271020829	0.364113816549538	0.276891796428138	0.188494953130139	0.273699511237506	0.391738299218331	0.584175233522182	0.333690404514613	0.344045650282028	0.313483942679942	0.120695695028013	0.309524989608867	0.368419083055341	0.405301578693163	0.333333333333333	1.26032401389722e-12	0.487696438119162	0.560659780703835	0.424430519171347	0.439860146903692	0.38204108388559	0.0604657198887873	0.376535495402376	0.478331175726599	0.415716466190982	0.185649132001117	0.331341000718192	0.245454545454534	0.171339994837945	0.140050917870317	0.294851755371647	0.402936820375903	0.169196669275948	0.226766302811213	0.389492080880221	0.524277994961229	0.323534032138323	0.34450104531788	0.328064887649482	0.345761079827144	1
2011-08-11	0.160348823083468	0.144742912005808	0.235016675166771	0.600000000000008	0.360899589619589	0.373784234204454	0.360229943494882	0.195599468944422	0.285734724049191	0.430186350659207	0.554867239707711	0.335886615800118	0.339103804485139	0.37710855684028	0.120862292213137	0.300333209819852	0.36730533458786	0.392043986877168	0.444444444444444	1.2597550966776e-12	0.487582942083772	0.555248400214151	0.420242399924379	0.435259648167807	0.372462376637683	0.0595894582388206	0.371075952007204	0.551771413621486	0.438216797056511	0.202254218328341	0.366071767107616	0.399999999999993	0.248288072588077	0.171427711616844	0.407119501200642	0.404110724568827	0.171128290553908	0.269107751864494	0.451575587171263	0.586117830171853	0.321102332086556	0.343349107816388	0.32957521153587	0.345227829065144	1
2011-08-12	0.155101253112023	0.150739131179783	0.235810224697403	0.504545454545463	0.409411308281902	0.347616350425552	0.409652236702656	0.184604087739741	0.300011696104616	0.457150406832244	0.58626670377789	0.336934823460499	0.336320671112162	0.450244546264169	0.125344530282266	0.325598216252796	0.381784064665127	0.427265709251674	0.444444444444444	1.25565093659909e-12	0.506315865911825	0.54339466731896	0.416267350577327	0.43073652040375	0.367367993058321	0.0564569337281036	0.363614135136301	0.469640943243855	0.475754933484295	0.199682726866612	0.442396785080029	0.495454545454538	0.334052215069948	0.223222532948204	0.512003786060287	0.410445592068898	0.172420249610082	0.159498203164102	0.489820999656364	0.556460424564554	0.32289967560308	0.341429211980569	0.332459224454992	0.345857964865651	1
2011-08-15	0.164596855917494	0.134670203344739	0.237166378487084	0.281818181818189	0.507295826128257	0.417554696855201	0.525890731967026	0.163818696769298	0.322537437297517	0.509220871781526	0.588087482292156	0.340306037821943	0.341655010077036	0.476873254193802	0.129735366883474	0.376714464085612	0.427447751831894	0.486131565347566	0.555555555555556	1.24477363083958e-12	0.564326422909914	0.51870157933297	0.415925414388958	0.427045526145207	0.368810653967622	0.0582335983378647	0.4032948839675	0.573836487339231	0.48516083881409	0.210849472826324	0.516280257739889	0.718181818181812	0.471647632682025	0.307289760358054	0.679106719569671	0.426906181617689	0.175096518247898	0.196058414047394	0.542120118218076	0.614896456149129	0.32887319964329	0.341237222396987	0.338761870500197	0.34886187157046	0
2011-08-16	0.164346971633139	0.118325399139857	0.236296856772438	0.318181818181819	0.490205904435855	0.421605189807025	0.515861141519869	0.154085404220706	0.32326851748545	0.503797343737256	0.581070790113884	0.338214630057132	0.340165320098551	0.485814379117342	0.132717825094282	0.381337160066009	0.395705920508654	0.534981303974477	0.555555555555556	1.24952777599276e-12	0.524412346874414	0.502149895472409	0.417355270889614	0.424395866904121	0.373861407283757	0.0578879801279153	0.395725113876161	0.526667119804912	0.48312179243926	0.211166393438373	0.55892229919117	0.681818181818182	0.550248225763686	0.391632503692427	0.730853463704659	0.438566200189952	0.17380264682555	0.18490467475806	0.502931219612441	0.494035577671573	0.334265230192859	0.341374357813831	0.34224853726245	0.35091335365661	0
2011-08-18	0.169344657320228	0.113267598410693	0.235187153475113	0.463636363636364	0.425144701946787	0.37421211076364	0.445185550140356	0.142933078433755	0.307824763371109	0.476260060824615	0.555024482243283	0.329186782467086	0.33616010572526	0.473935408143997	0.130512410021744	0.354917756600595	0.385682184301315	0.568868372982731	0.555555555555556	1.24828625113813e-12	0.511397429209374	0.498806558925826	0.413984134308175	0.421561443024548	0.37888807361632	0.0595974323796679	0.408393537308629	0.529748529332167	0.483611048171865	0.210759731998379	0.515460930108701	0.536363636363636	0.550129879845884	0.44781839214125	0.663004638984975	0.441112776865382	0.171338990289081	0.21608742907122	0.438009079395468	0.442849810188159	0.337648465047491	0.341017805730036	0.341712592699082	0.350966799946859	0
2011-08-19	0.154101715974605	0.119477104066185	0.234503856474188	0.467005076142136	0.400387367769525	0.453658234203665	0.420817353647695	0.139346079554179	0.310252753910686	0.466255953474694	0.530007830319995	0.329016191146576	0.336552598893244	0.382610283888861	0.132850167092295	0.390514244215619	0.389580303937501	0.583946609849367	0.444444444444444	1.259835322616e-12	0.516033528102705	0.499657359242602	0.409945024413115	0.418437594014225	0.382917092580255	0.0590595260220074	0.385062507693813	0.373424913695521	0.441077893314578	0.186079936051447	0.438570101510013	0.532994923857864	0.548834653850562	0.484809341544876	0.615961753477167	0.440641317587421	0.172865895544537	0.211771888961852	0.406456233024023	0.482784404954666	0.338547136805753	0.340222420312339	0.340193263263191	0.350350356614525	0
2011-08-22	0.149853683140578	0.125793393252253	0.233940901317251	0.511235955056185	0.366912713335673	0.466644366595321	0.382085485856842	0.135810134089193	0.30949627769153	0.452277186933195	0.565249343218959	0.331263130384846	0.337658716003017	0.396863297202017	0.138132094713289	0.400615742598083	0.387352807002537	0.570607459688144	0.444444444444444	1.25989689930957e-12	0.512842497999513	0.505097692714182	0.402998368266309	0.414465791698336	0.385065596055686	0.0591452239248153	0.356031577351989	0.407428534797467	0.437832816076227	0.187113442908826	0.433376354383708	0.488764044943815	0.53200088800277	0.503409452215067	0.560755582431961	0.43670080925035	0.172576898381945	0.211455873582377	0.380314492505194	0.471603013152987	0.337384149824473	0.340551545312766	0.337571408119857	0.348931909420778	1
2011-08-23	0.146105418875261	0.129431802619137	0.234400917240206	0.387640449438204	0.417345181794207	0.513051965889141	0.446846567772201	0.13531732585073	0.313977793063495	0.475225566468383	0.572613151862137	0.332945698656899	0.341985061150112	0.454751995358458	0.145964460557263	0.415728974617727	0.397933417443617	0.531525531655963	0.555555555555556	1.25804029244038e-12	0.52670042125732	0.502034948308532	0.398058827392242	0.410241144422961	0.387582571360588	0.0576621898689454	0.322967191082233	0.386732336363872	0.466727950125033	0.191642062106636	0.472327814705986	0.612359550561797	0.565404555091894	0.527835573522257	0.596487947858269	0.43885263010019	0.173435059884702	0.155220377690233	0.412560859491905	0.558650721572304	0.334793860638896	0.342306878648372	0.33779002217765	0.348888576065715	0
2011-08-24	0.14660518744397	0.130946898211772	0.233850553176857	0.528089887640449	0.369685202988723	0.452621704497271	0.385700456865724	0.132592112327417	0.308648654458234	0.454502119725576	0.566602480362302	0.332624656127129	0.351324614488277	0.458662081820661	0.150900748197327	0.390856454560151	0.416867141390815	0.490426437550361	0.444444444444444	1.25877467032921e-12	0.551210187052034	0.506621328193296	0.394317449593907	0.406068237272206	0.388656932375428	0.0568913741198683	0.304180141779227	0.463713882772396	0.458860764499987	0.195443489412798	0.45792810211276	0.471910112359552	0.536962100968376	0.533879751566189	0.533758543460305	0.435443377772745	0.172256066990669	0.130877971964603	0.393695264633015	0.456376140298959	0.331304899695056	0.34329425364965	0.335701085920707	0.347583559742354	1
2011-08-25	0.162597781642658	0.116531687841892	0.23589604694514	0.0164835164835249	0.546085056784004	0.565712799734762	0.655064607248594	0.12947749655	0.337483593281003	0.548207790012612	0.587314992830608	0.348934094118822	0.367934211733416	0.526082765238035	0.157028102347596	0.437734756385479	0.486476420608445	0.489806065169751	0.444444444444444	1.26441829663151e-12	0.641127829664575	0.481414721155496	0.396045793244125	0.403096328368242	0.395334398704263	0.0619507305096854	0.419512434489317	0.702450801473697	0.523901089997288	0.274069731002525	0.62005889567056	0.983516483516476	0.702724308153419	0.597587207704404	0.780281806599393	0.454055570855744	0.177466614659798	0.205442754975494	0.5266336399516	0.712930064282141	0.334529545415877	0.346722639070756	0.342800241805537	0.351340153802634	1
2011-08-26	0.154101715974605	0.103848200557492	0.237032556151051	0.00543478260869938	0.552096686790492	0.629665980026355	0.649692024407231	0.137864531569877	0.362425642381113	0.549435601332274	0.577228716897354	0.350554854135953	0.384445685686559	0.617093907536607	0.165610495063377	0.423711264517831	0.487033294842186	0.504689917309491	0.444444444444444	1.26249605380272e-12	0.641622839737661	0.46170913538494	0.399823049764418	0.40151959702988	0.405419709351828	0.0630861219691619	0.430881835787143	0.489742345499551	0.566856669471672	0.242442120418112	0.647467367584025	0.994565217391302	0.817221772250149	0.681280425421694	0.902799828456464	0.469664099074163	0.180313266229395	0.157406574100215	0.515951383603797	0.519043108790591	0.33865286289496	0.349328211990797	0.347890561029366	0.354616860642664	0
2011-08-29	0.155601021680731	0.100503353725321	0.235046326587783	0.364130434782605	0.43131269930779	0.579770095938556	0.480381870297047	0.129941226863243	0.359326758523353	0.486991935537797	0.551566815779456	0.321742371891559	0.394213413389797	0.57278878078545	0.167638034739919	0.336546227411961	0.446938350012831	0.517200330095091	0.333333333333333	1.26321954545937e-12	0.59076714877364	0.466320929888266	0.39954603548253	0.400199483655175	0.412601145429098	0.0653065075348439	0.497498129087554	0.575940898180392	0.544495423296308	0.269506065596221	0.500497132445355	0.635869565217396	0.764040486354103	0.717929482938688	0.755004034046313	0.467574235730462	0.17884338761161	0.174292572376665	0.416518479090189	0.37208915060072	0.340238754233069	0.349547628657748	0.34538455471854	0.353946159555954	0
2011-08-30	0.149853683140577	0.0927692024774516	0.234079278380841	0.446540880503151	0.424764955866167	0.538638362860249	0.475259038080787	0.122235968343278	0.339052344073912	0.485601512014406	0.572791244807637	0.32099736539718	0.399949165821926	0.654488863522187	0.164858326137961	0.339372919695894	0.42577712913067	0.529939761802361	0.222222222222222	1.26341800489596e-12	0.562725761385931	0.470967774569851	0.400926726777779	0.399436105871099	0.417370385026415	0.0655004476075693	0.477799879996283	0.45076843923931	0.539555962661952	0.270130456456874	0.504814139782332	0.553459119496849	0.698830657208977	0.718885229493975	0.626711559095939	0.465138440089628	0.176335965064022	0.135293139082628	0.404421115283529	0.502202219944081	0.340450206411483	0.348313409906149	0.343356335210714	0.353194274239752	1
2011-08-31	0.152352525984122	0.0895310236576421	0.2346526098824	0.339622641509437	0.455569618399118	0.529892245276377	0.528852021415563	0.120517152361164	0.330518112040349	0.503300783565683	0.553712211861427	0.333467320472552	0.40249145111455	0.604243529667089	0.169596423206639	0.376126674654816	0.423549632195706	0.556559447525759	0.333333333333333	1.26317873708411e-12	0.559631689536584	0.469492991735464	0.401164826419042	0.398875881864754	0.421580946790337	0.0644822542421524	0.43390820909997	0.430315910294997	0.546986966951126	0.271088961846186	0.489047751053283	0.660377358490564	0.693962015703983	0.717769576906223	0.618561625717129	0.467031504590184	0.176766268446603	0.155731560279334	0.424097380978816	0.547201220526726	0.34288190646325	0.347764868238773	0.343523770566417	0.353442397341565	1
2011-09-01	0.141857386041235	0.085250268280032	0.235156576919708	0.410714285714278	0.470138121617169	0.539896385544535	0.552144612266411	0.121018584329254	0.325659620838292	0.510922389839136	0.574933538845233	0.334166790150467	0.401777827172761	0.595035811521459	0.172868822482381	0.392348025696003	0.400717788612323	0.53232627812503	0.444444444444444	1.26390505173607e-12	0.530524419612212	0.466112805390578	0.402093715977315	0.398624631525596	0.425772556846356	0.0640443002601228	0.391592551840741	0.404310235526676	0.527954673373246	0.264247807870091	0.519602901802494	0.589285714285724	0.665047454462653	0.706615936844174	0.575608808193822	0.470334973829987	0.176871460332299	0.12242138160411	0.422689783295664	0.527791125589104	0.340714521634501	0.348313409906149	0.34435049140477	0.354051666915379	0
2011-09-05	0.148604261718806	0.0950426616752721	0.234548730700974	0.839285714285706	0.385246349487981	0.549502720800602	0.414012885242259	0.118411849975777	0.318105397359571	0.465237932358289	0.537724743086882	0.330720476199831	0.398727084821613	0.540711441180915	0.175229980518669	0.369316359236343	0.378442819262681	0.491068426911025	0.444444444444444	1.25245088647308e-12	0.501611774086568	0.477546894614443	0.402132954099532	0.398431949916956	0.426476573036368	0.064417620710157	0.364567042862264	0.441591286477134	0.480461656907828	0.278924423445459	0.353373937937758	0.160714285714294	0.491028360383551	0.636529513615804	0.32066365729686	0.462517982496289	0.176149862470259	0.126994730339231	0.374235449598595	0.407512672829598	0.335798258486364	0.347902003655617	0.340611055023034	0.3521126016236	0
2011-09-06	0.131862014667056	0.105900328799579	0.234049809683431	0.919642857142866	0.370651513406547	0.597147859190496	0.386684153203578	0.118590141978317	0.311061216956439	0.455959085528262	0.559258504033682	0.329965925329072	0.39705898885768	0.464348440460616	0.175159254030054	0.345517260059278	0.391250926638724	0.47487034883206	0.444444444444444	1.25959470162202e-12	0.517723071536231	0.488593606494986	0.399005473451291	0.397614764323745	0.424441945548968	0.0622550019704903	0.33302376465264	0.326642181263028	0.440102146880603	0.259010210264139	0.338960022662599	0.0803571428571341	0.346001371012812	0.537592357283435	0.156966611933901	0.454530609890546	0.175569661467362	0.1168837529186	0.385401085615974	0.491063878142666	0.333895188880634	0.347737441155404	0.337313613008839	0.350069051423955	1
2011-09-07	0.134610741794956	0.104438663826571	0.234621549814936	0.651785714285708	0.430953370960904	0.639488863631179	0.471223832978489	0.109609698872194	0.312660322007562	0.482612758842934	0.579829106273973	0.334067937637728	0.401394254304049	0.449434991368668	0.180709050514134	0.38803173883466	0.415196518689591	0.473395313743027	0.444444444444444	1.25753891946365e-12	0.548918477386083	0.48770741645991	0.398518616857324	0.396857800008219	0.422939678536103	0.0603248797212239	0.313696968675533	0.417662348704732	0.466712716617253	0.26782008070118	0.419547207012715	0.348214285714293	0.346030911381209	0.471644888237728	0.236390066887928	0.455047001611446	0.176382296477346	0.135835824511486	0.431132159174862	0.576138613218295	0.333789462791426	0.347792295322141	0.337796933087276	0.349920529918215	0
2011-09-08	0.123615833283359	0.103081403494491	0.234178623669684	0.732142857142842	0.414637871930521	0.600871955033497	0.425040477291121	0.0922953775202895	0.309429821949861	0.47098400069491	0.570961840230956	0.33411255834659	0.406505585787112	0.520754380157188	0.18213184337173	0.310586913061574	0.420208386793261	0.455116431237342	0.444444444444444	1.25153557248511e-12	0.555514113537176	0.48939028917101	0.398669222925534	0.396284157736128	0.421289543251363	0.0575949012855258	0.285934336754263	0.339419012849088	0.482102229123004	0.261568004617802	0.435056866259544	0.267857142857159	0.317036344975478	0.417241233602388	0.245331393321714	0.45369461583527	0.175726735124114	0.123579278551038	0.42054095166967	0.491340867946216	0.332309297542525	0.348285982822781	0.33731466204653	0.349341970088964	0
2011-09-09	0.125115138989486	0.107140426871614	0.233709929320637	0.812500000000002	0.39798615204001	0.633419106446543	0.376821859728508	0.0835724956401854	0.303951808616426	0.460129189682347	0.564269193895719	0.33222039150579	0.407433296911438	0.531440926803717	0.17261329188133	0.301233231375751	0.402945285547287	0.453831250191523	0.333333333333333	1.247439100792e-12	0.532982386569866	0.492960395243699	0.399080976709277	0.395912537617633	0.419093712689897	0.0563695983429909	0.265881363332198	0.42428938690174	0.484796907762203	0.260946612620529	0.417716716207795	0.187499999999999	0.268692374053653	0.363567248275682	0.215668261332053	0.450886052231977	0.175014536376894	0.0955277970540981	0.416295362403107	0.491223115662331	0.329930460535362	0.34592725365306	0.336188663592997	0.348411560722295	1
2011-09-13	0.125115138989486	0.117954302344156	0.234163573873316	0.707317073170737	0.407030960754896	0.618490251721969	0.385821304654739	0.0785730746902114	0.308800050069051	0.463660008978768	0.535903656758055	0.332734011697211	0.41076056854003	0.537131615052015	0.172557088849263	0.351731511757915	0.419094638325777	0.478549315268405	0.333333333333333	1.27102285207215e-12	0.554082741910785	0.494042727628657	0.399515603684581	0.395707384444008	0.417032327354431	0.0549787875665419	0.248378013698545	0.449539354055955	0.50013866696669	0.258431635996041	0.351836018097486	0.292682926829263	0.274441075207647	0.329854248986359	0.267449351354785	0.449821451942008	0.176178945184004	0.114846743416779	0.432381945645861	0.519520276855917	0.330300501847587	0.343568524483339	0.33579554659125	0.347853446576641	0
2011-09-14	0.127863866117385	0.124776347541796	0.233516428277887	0.788617886178864	0.386807982918849	0.597684006098172	0.350840359602064	0.081889002648982	0.312920219034697	0.454804661072528	0.568332505447988	0.332534509927197	0.40260741500509	0.484635323435714	0.178658357368959	0.347103519212139	0.360622843782967	0.488923315684797	0.333333333333333	1.25515133225487e-12	0.479242779297595	0.497397132782966	0.402589579233128	0.396194958883763	0.41456899327159	0.0544442917744854	0.256160724119941	0.536875284377307	0.477632015200516	0.255329662272999	0.357323107337063	0.211382113821136	0.248918555125283	0.298190253136549	0.255793750755134	0.447055075350529	0.176546480870947	0.124016207661881	0.418214286863944	0.488966782962394	0.330617680115209	0.342745711982274	0.33463959700523	0.346888983026145	1
2011-09-15	0.125115138989486	0.126199461894896	0.234266497722823	0.674796747967469	0.421134536124585	0.541265586576378	0.416077473516656	0.080870635754159	0.31551104499147	0.471517721237285	0.573811131369436	0.333303614197526	0.391706809294262	0.544518544721684	0.185420023785339	0.345057788164948	0.366191586120379	0.486928033469218	0.444444444444444	1.26718292891609e-12	0.486691344902658	0.49527136257648	0.407827143743889	0.397695406242259	0.413037878768221	0.0522315812250901	0.274916843186174	0.53190274609754	0.504861167231239	0.251840958805286	0.415314133627869	0.325203252032531	0.273000524262751	0.285750955851674	0.31771767965349	0.44827614708169	0.176772623494302	0.113679373963177	0.434114235699902	0.541333408461872	0.330089049669173	0.342416586981848	0.335120384166681	0.346810831070502	1
2011-09-16	0.114120230477889	0.107190140284876	0.235890814245764	0.317073170731692	0.516333025244478	0.629964520866269	0.612777417109277	0.0757450362154304	0.330846321924717	0.515559645401698	0.57804564374746	0.340204642443054	0.389601618665986	0.525401515951588	0.192466535116711	0.372246693428775	0.427447751831894	0.504452191740578	0.444444444444444	1.25823829324869e-12	0.564495138365199	0.480309995438844	0.41489822761807	0.400394866488151	0.415231751520649	0.0549872083080609	0.376463320491146	0.447240566611925	0.468488201525344	0.184874941271236	0.560346172578517	0.682926829268309	0.418217115435182	0.329739225952461	0.547913784084968	0.459216821753829	0.179343675829814	0.12601354551329	0.490926225007463	0.604921881598415	0.332362160587128	0.34282799323238	0.339373943914345	0.348981317259164	0
2011-09-19	0.11861814759627	0.0921450978793184	0.235424891475754	0.54166666666666	0.430363640397752	0.673906251218904	0.44024822685166	0.0733989266236665	0.330305868657507	0.476389424655063	0.553089363055677	0.337624737568964	0.385623165190511	0.443059142081752	0.197732668267807	0.378629017328506	0.407400279417216	0.518418247362858	0.333333333333333	1.25988744580078e-12	0.5388157430943	0.480829271652544	0.418916240224593	0.40340627186916	0.416905951857724	0.0526368754267721	0.345074914995051	0.343611552440304	0.438706905993278	0.197107779818906	0.482712957652345	0.458333333333341	0.433935023197331	0.364723528409565	0.536457040084681	0.45915834577503	0.178468416893728	0.131448952132507	0.430888052282279	0.425355019245938	0.332996517122372	0.341922899481208	0.338634164073366	0.348725870779137	1
2011-09-20	0.108622776222091	0.0774641662070845	0.235763908154143	0.395833333333338	0.459535887532506	0.642964300164743	0.499416936911238	0.0723851791260257	0.32890933409609	0.489630717362703	0.568975676482504	0.331716937680597	0.380868645678342	0.578693931612903	0.201260970732461	0.396667859998799	0.405729656715992	0.522041211498367	0.444444444444444	1.28054773691587e-12	0.536732686788474	0.476933167475303	0.421534243747491	0.406370424982441	0.419173742304501	0.0513799667007318	0.30611494245938	0.206266986748134	0.49213435827237	0.160492291556039	0.517788025284876	0.604166666666663	0.497069137233151	0.410776052531668	0.604129323597186	0.462359747290493	0.178599832361563	0.14998012203317	0.445170480049503	0.54096754390348	0.334159504103652	0.342718284898905	0.339392397731511	0.349227823699332	1
2011-09-21	0.112121156203054	0.0758024678611165	0.236571313733823	0.134615384615399	0.521616505759305	0.676092228678883	0.633518828715594	0.072895625093367	0.333257146111733	0.518223316000357	0.584606101214592	0.33565471187607	0.379004303130419	0.570763539544904	0.203213158091534	0.397605739400465	0.419094638325777	0.535940507677036	0.555555555555556	1.26383741994928e-12	0.553748592250753	0.464643600352856	0.42455087453896	0.409381287099022	0.423889242123119	0.0522724134928285	0.323404767064341	0.455098010377617	0.516973276282383	0.170669030880937	0.631642025656925	0.865384615384603	0.633475556967862	0.490587016675374	0.774036308399195	0.472014629524662	0.179750963732451	0.203820023759002	0.478865196021145	0.578712289749156	0.337542738958284	0.344638180734724	0.342758275908478	0.351263551505182	0
2011-09-22	0.109872197643864	0.0742594622541465	0.235883638531198	0.480769230769235	0.446251121580663	0.614675039597354	0.464483177243266	0.0722700455748477	0.324115055309172	0.482170613567204	0.560916451105891	0.333042519744261	0.381582269620131	0.562642068409032	0.202594114608088	0.376994938550451	0.42577712913067	0.541685020968273	0.444444444444444	1.25250647323945e-12	0.562701454742965	0.466108442747953	0.422698999247044	0.411397370698476	0.427383172485864	0.0531035586860044	0.325577202405496	0.511881607574243	0.480879148280371	0.182109650619352	0.539497695481475	0.519230769230767	0.599428665575014	0.531536703821704	0.658371940315189	0.471713160588839	0.178172058158246	0.177131685017483	0.419167850136629	0.434304675269843	0.338282821582735	0.3447478890682	0.341784256987643	0.351100978048113	0
2011-09-23	0.115869420468371	0.0621526983542608	0.235216343845398	0.557692307692296	0.430494131123541	0.649111109760553	0.424678623510397	0.0707644667815764	0.320686850523798	0.473093135615215	0.542802540782062	0.330282216213982	0.387326942351533	0.490170593970891	0.206284872152278	0.37783057928492	0.426334003364413	0.5221897029828	0.444444444444444	1.2575173257375e-12	0.563533972022826	0.469587368877981	0.42098957590066	0.412647831952981	0.429396098163459	0.0535304524411221	0.325937922541853	0.527378408357897	0.469866527253989	0.181651194459806	0.455407503037993	0.442307692307705	0.548956403635492	0.540665381905559	0.548978015705593	0.469752666903594	0.178461766573134	0.217031870552486	0.406005357680215	0.49355523830965	0.336274025887796	0.344885024485044	0.340419813772537	0.350561703638179	0
2011-09-26	0.121116990439815	0.0650064319248989	0.234345415022748	0.950819672131145	0.329678127750424	0.474128940547294	0.181694649918565	0.0740428900373881	0.306425390161594	0.421723306616378	0.540712912062398	0.328001609008489	0.385542882497061	0.47549521389568	0.196040058865381	0.329888162692757	0.377329070795198	0.505675747919062	0.444444444444444	1.25842648289967e-12	0.498970173897963	0.489182866833632	0.417993436109783	0.413013005517159	0.426457428203246	0.0492423161962472	0.347875690359373	0.539748069436734	0.462235378458013	0.193102404082922	0.27935488127683	0.0491803278688548	0.373363167831534	0.483533778809431	0.275372947685328	0.455511987808696	0.176462109805566	0.244435209038397	0.343628676564558	0.382927398546182	0.333313695389993	0.343678232816814	0.334325729770304	0.347175095837465	1
[truncated: 1,509 more rows]
