# Supplementary material for: An Empirical Study of Machine Learning Algorithms for Stock Daily Trading Strategy
Source: Hindawi journal article supplement (doi:10.1155/2019/7816154), 2019-01-01
Supplement: f1 [file 7816154.f1.zip › Optional Supplementary Materials(Data, code, and results)/CSICS/000001_New.csv]

	Close	High	Low	Open	Volume
2004-01-02	1.79780439814815	1.80058662749288	1.73381312321937	1.76163541666667	5804780
2004-01-05	1.87570681980057	1.89240019586895	1.78667548076923	1.79780439814815	12057777
2004-01-06	1.98977822293447	2.05098726851852	1.8979646545584	1.8979646545584	37591745
2004-01-07	2.00647159900285	2.04542280982906	1.96752038817664	1.98977822293447	19536244
2004-01-08	2.01203605769231	2.02872943376068	1.96195592948718	2.00925382834758	12701527
2004-01-09	1.90631134259259	2.02594720441595	1.8979646545584	2.01203605769231	16045970
2004-01-12	1.95082701210826	1.95360924145299	1.88683573717949	1.8979646545584	9085634
2004-01-13	1.94804478276353	2.00647159900285	1.92022248931624	1.96752038817664	10865359
2004-01-14	1.90631134259259	1.96195592948718	1.8979646545584	1.95917370014245	7326908
2004-01-15	1.9257869480057	1.95082701210826	1.8979646545584	1.90631134259259	6167846
2004-01-16	1.97586707621083	1.98977822293447	1.92022248931624	1.9257869480057	8907718
2004-01-29	2.04542280982906	2.05933395655271	1.95360924145299	1.97586707621083	11326806
2004-01-30	1.97586707621083	2.06211618589744	1.9730848468661	2.05098726851852	8234225
2004-02-02	2.08437402065527	2.11776077279202	1.99534268162393	2.00925382834758	23519653
2004-02-03	2.12888969017094	2.15671198361823	2.05376949786325	2.08437402065527	17544695
2004-02-04	2.17896981837607	2.19844542378917	2.1344541488604	2.14280083689459	19397504
2004-02-05	2.19288096509971	2.25409001068376	2.17062313034188	2.19288096509971	17483903
2004-02-06	2.31808128561254	2.44884606481481	2.14280083689459	2.19844542378917	43812503
2004-02-09	2.34033912037037	2.38207256054131	2.29304122150997	2.32642797364672	19630069
2004-02-10	2.38207256054131	2.44049937678063	2.31808128561254	2.35703249643875	23260262
2004-02-11	2.34868580840456	2.4098948539886	2.30138790954416	2.39320147792023	20199117
2004-02-12	2.31808128561254	2.40154816595442	2.31529905626781	2.35703249643875	14827641
2004-02-13	2.24574332264957	2.33755689102564	2.23461440527066	2.29860568019943	14423658
2004-02-16	2.3431213497151	2.35146803774929	2.24574332264957	2.24574332264957	12619536
2004-02-17	2.33477466168091	2.38485478988604	2.32086351495726	2.34590357905983	11930389
2004-02-18	2.32364574430199	2.37650810185185	2.30138790954416	2.32086351495726	12168461
2004-02-19	2.34033912037037	2.38485478988604	2.31529905626781	2.32642797364672	11797292
2004-02-20	2.48779727564103	2.52396625712251	2.33477466168091	2.3431213497151	59757094
2004-02-23	2.42937045940171	2.56291746794872	2.42658823005698	2.49614396367521	31529582
2004-02-24	2.34590357905983	2.42658823005698	2.30138790954416	2.42658823005698	21951132
2004-02-25	2.25965446937322	2.3904192485755	2.24574332264957	2.34868580840456	18810525
2004-02-26	2.27078338675214	2.29025899216524	2.21792102920228	2.25409001068376	13566783
2004-02-27	2.2763478454416	2.29860568019943	2.24017886396011	2.27356561609687	8180086
2004-03-01	2.27913007478632	2.28747676282051	2.19009873575499	2.26521892806268	9583648
2004-03-02	2.30138790954416	2.33477466168091	2.27356561609687	2.28747676282051	9874340
2004-03-03	2.34590357905983	2.40433039529915	2.25965446937322	2.26521892806268	18211090
2004-03-04	2.47110389957265	2.48223281695157	2.32921020299145	2.33755689102564	34066490
2004-03-05	2.3625969551282	2.50727288105413	2.35703249643875	2.49614396367521	22448758
2004-03-08	2.29025899216524	2.4098948539886	2.2763478454416	2.3625969551282	13280269
2004-03-09	2.2958234508547	2.35981472578348	2.28191230413105	2.28191230413105	8771816
2004-03-10	2.36537918447293	2.37094364316239	2.2958234508547	2.2958234508547	8059458
2004-03-11	2.39598370726496	2.42380600071225	2.35703249643875	2.37372587250712	12175180
2004-03-12	2.35981472578348	2.39320147792023	2.33199243233618	2.38485478988604	8074978
2004-03-15	2.44606383547009	2.45441052350427	2.3431213497151	2.3431213497151	20382781
2004-03-16	2.42658823005698	2.46275721153846	2.39876593660969	2.45162829415954	12458035
2004-03-17	2.51840179843305	2.54900632122507	2.41267708333333	2.42937045940171	38534338
2004-03-18	2.45441052350427	2.56569969729345	2.44328160612536	2.52396625712251	29509166
2004-03-19	2.50170842236467	2.51005511039886	2.44049937678063	2.45441052350427	14215519
2004-03-22	2.54065963319088	2.55735300925926	2.49614396367521	2.51005511039886	15192734
2004-03-23	2.47666835826211	2.54622409188034	2.44606383547009	2.54065963319088	17369175
2004-03-24	2.42380600071225	2.46832167022792	2.39320147792023	2.46832167022792	16101349
2004-03-25	2.42102377136752	2.47110389957265	2.38763701923077	2.42380600071225	9472232
2004-03-26	2.41267708333333	2.44049937678063	2.38485478988604	2.42102377136752	8743083
2004-03-29	2.32642797364672	2.41545931267806	2.30973459757835	2.39876593660969	19253541
2004-03-30	2.34868580840456	2.3625969551282	2.31529905626781	2.33199243233618	6928043
2004-03-31	2.35981472578348	2.36816141381766	2.32642797364672	2.36816141381766	6407592
2004-04-01	2.36816141381766	2.38485478988604	2.32364574430199	2.35981472578348	8896248
2004-04-02	2.37929033119658	2.38207256054131	2.3431213497151	2.37094364316239	8675925
2004-04-05	2.34033912037037	2.39320147792023	2.32364574430199	2.38485478988604	8678689
2004-04-06	2.35703249643875	2.3625969551282	2.29860568019943	2.3431213497151	11322094
2004-04-07	2.31808128561254	2.35703249643875	2.30973459757835	2.35425026709402	9570810
2004-04-08	2.28469453347578	2.31808128561254	2.28191230413105	2.31529905626781	11468470
2004-04-09	2.24296109330484	2.32086351495726	2.22626771723647	2.28469453347578	11652085
2004-04-12	2.25409001068376	2.25965446937322	2.21513879985755	2.23183217592593	7828709
2004-04-13	2.14836529558405	2.27356561609687	2.14280083689459	2.25409001068376	16066004
2004-04-14	2.07046287393162	2.14836529558405	2.0398583511396	2.14836529558405	16561009
2004-04-15	2.11776077279202	2.22626771723647	2.07324510327635	2.07602733262108	14663949
2004-04-16	2.10663185541311	2.1539297542735	2.05098726851852	2.12054300213675	6910611
2004-04-19	1.99534268162393	2.12054300213675	1.98143153490029	2.10663185541311	8618927
2004-04-20	2.00368936965812	2.03429389245014	1.95639147079772	1.98143153490029	6236145
2004-04-21	2.04264058048433	2.07880956196581	2.01760051638177	2.01760051638177	6101887
2004-04-22	2.06489841524216	2.07046287393162	2.03151166310541	2.04264058048433	3617293
2004-04-23	2.00368936965812	2.07880956196581	2.00090714031339	2.07046287393162	3782786
2004-04-26	1.99812491096866	2.02594720441595	1.98143153490029	2.00368936965812	2761123
2004-04-27	1.94804478276353	2.02316497507122	1.93969809472935	1.99534268162393	5270796
2004-04-28	1.96473815883191	1.98977822293447	1.87014236111111	1.9452625534188	6774513
2004-04-29	1.96473815883191	2.01481828703704	1.95360924145299	1.96473815883191	5411255
2004-04-30	1.98977822293447	2.03429389245014	1.95639147079772	1.95917370014245	4771468
2004-05-10	1.91744025997151	2.00925382834758	1.91187580128205	1.9925604522792	3590924
2004-05-11	1.94248032407407	1.94804478276353	1.8979646545584	1.91744025997151	2443107
2004-05-12	1.9925604522792	1.99812491096866	1.93413363603989	1.94248032407407	2997941
2004-05-13	1.98699599358974	2.00368936965812	1.96752038817664	1.9925604522792	2731366
2004-05-14	1.93135140669516	1.98977822293447	1.9257869480057	1.98143153490029	2936895
2004-05-17	1.90909357193732	1.95639147079772	1.90074688390313	1.93135140669516	2864953
2004-05-18	1.96752038817664	1.96752038817664	1.90631134259259	1.92022248931624	2234901
2004-05-19	1.95917370014245	1.9925604522792	1.93969809472935	1.97030261752137	3165565
2004-05-20	1.93413363603989	1.98699599358974	1.92300471866097	1.95917370014245	2027089
2004-05-21	1.94804478276353	1.95360924145299	1.92300471866097	1.92300471866097	1379114
2004-05-24	1.93135140669516	1.98143153490029	1.92856917735043	1.94804478276353	2138472
2004-05-25	1.90352911324786	1.94804478276353	1.8979646545584	1.93135140669516	2758384
2004-05-26	1.85901344373219	1.91744025997151	1.84510229700855	1.90352911324786	4405323
2004-05-27	1.95360924145299	1.97586707621083	1.85901344373219	1.86457790242165	6280757
2004-05-28	1.96752038817664	1.96752038817664	1.93135140669516	1.95360924145299	3193031
2004-05-31	2.07046287393162	2.14836529558405	2.03151166310541	2.05933395655271	14833913
2004-06-01	2.07880956196581	2.12054300213675	2.07046287393162	2.09828516737892	9767510
2004-06-02	2.15949421296296	2.18731650641026	2.07602733262108	2.09272070868946	16192206
2004-06-03	2.09550293803419	2.14836529558405	2.07880956196581	2.14836529558405	6878122
2004-06-04	2.07324510327635	2.10941408475783	2.06489841524216	2.09272070868946	4538796
2004-06-07	2.01203605769231	2.07880956196581	2.00368936965812	2.07324510327635	4077004
2004-06-08	1.95360924145299	2.02872943376068	1.95082701210826	2.00368936965812	4031424
2004-06-09	1.9257869480057	1.96473815883191	1.91744025997151	1.94804478276353	3887789
2004-06-10	1.92022248931624	1.94248032407407	1.90631134259259	1.9257869480057	3171248
2004-06-11	1.92022248931624	1.98977822293447	1.8979646545584	1.92300471866097	3725591
2004-06-14	1.86736013176638	1.91187580128205	1.84232006766382	1.8979646545584	3666796
2004-06-15	1.98143153490029	2.02872943376068	1.84232006766382	1.85901344373219	5295282
2004-06-16	1.95639147079772	1.98699599358974	1.93413363603989	1.98143153490029	3317098
2004-06-17	1.8979646545584	1.95639147079772	1.88127127849003	1.95639147079772	2913721
2004-06-18	1.9257869480057	1.93969809472935	1.88405350783476	1.8979646545584	2700508
2004-06-21	1.92022248931624	1.9257869480057	1.85901344373219	1.90352911324786	1916451
2004-06-22	1.92856917735043	1.9452625534188	1.8979646545584	1.92022248931624	2473812
2004-06-23	1.91187580128205	1.94804478276353	1.8979646545584	1.93969809472935	1731162
2004-06-24	1.87570681980057	1.93135140669516	1.87014236111111	1.90352911324786	2759182
2004-06-25	1.86179567307692	1.9257869480057	1.85901344373219	1.87014236111111	3103844
2004-06-28	1.73381312321937	1.87014236111111	1.72546643518519	1.84510229700855	5999953
2004-06-29	1.78667548076923	1.79502216880342	1.73103089387464	1.73381312321937	3576755
2004-07-01	1.8311911502849	1.84232006766382	1.74494204059829	1.7644176460114	3650686
2004-07-02	1.81171554487179	1.84232006766382	1.80058662749288	1.83675560897436	2735630
2004-07-05	1.79780439814815	1.82562669159544	1.7838932514245	1.81449777421652	1682130
2004-07-06	1.80893331552707	1.8311911502849	1.79780439814815	1.79780439814815	2088629
2004-07-07	1.77554656339031	1.81449777421652	1.76719987535612	1.80893331552707	1923263
2004-07-08	1.76163541666667	1.78111102207977	1.75885318732194	1.77276433404558	1828827
2004-07-09	1.74494204059829	1.82006223290598	1.73937758190883	1.77276433404558	2320243
2004-07-12	1.70320860042735	1.75607095797721	1.69764414173789	1.74494204059829	3556331
2004-07-13	1.717119747151	1.72824866452991	1.70042637108262	1.70877305911681	1379240
2004-07-14	1.69764414173789	1.73103089387464	1.6698218482906	1.717119747151	2381433
2004-07-15	1.73103089387464	1.74494204059829	1.69764414173789	1.70042637108262	2113052
2004-07-16	1.7838932514245	1.79223993945869	1.72824866452991	1.73103089387464	5250215
2004-07-19	1.7838932514245	1.80336885683761	1.75607095797721	1.78111102207977	2475375
2004-07-20	1.74772426994302	1.7838932514245	1.74494204059829	1.7838932514245	2302144
2004-07-21	1.72824866452991	1.75328872863248	1.72546643518519	1.74772426994302	1861981
2004-07-22	1.68373299501425	1.74494204059829	1.67538630698006	1.73103089387464	3757114
2004-07-23	1.65869293091168	1.68095076566952	1.61974172008547	1.68095076566952	5908841
2004-07-26	1.65034624287749	1.68373299501425	1.64478178418803	1.66147516025641	2119731
2004-07-27	1.63087063746439	1.66425738960114	1.61974172008547	1.65034624287749	2208980
2004-07-28	1.64756401353276	1.66425738960114	1.62808840811966	1.63365286680912	1567867
2004-07-29	1.67538630698006	1.67816853632479	1.64756401353276	1.64756401353276	1958987
2004-07-30	1.65034624287749	1.68095076566952	1.64199955484331	1.67538630698006	1634092
2004-08-02	1.63643509615385	1.64756401353276	1.6225239494302	1.64199955484331	1477232
2004-08-03	1.62808840811966	1.64199955484331	1.6225239494302	1.63643509615385	1709906
2004-08-04	1.67260407763533	1.70042637108262	1.61974172008547	1.62530617877493	3104425
2004-08-05	1.64478178418803	1.69207968304843	1.64199955484331	1.66147516025641	1788359
2004-08-06	1.64756401353276	1.66147516025641	1.64199955484331	1.64478178418803	1394539
2004-08-09	1.65312847222222	1.67538630698006	1.62808840811966	1.64756401353276	1616402
2004-08-10	1.65869293091168	1.66703961894587	1.62530617877493	1.65591070156695	1917343
2004-08-11	1.64478178418803	1.66147516025641	1.63365286680912	1.65869293091168	1376076
2004-08-12	1.61139503205128	1.63921732549858	1.59191942663818	1.63921732549858	3174146
2004-08-13	1.62808840811966	1.66425738960114	1.60861280270655	1.61417726139601	2190821
2004-08-16	1.63643509615385	1.67538630698006	1.61139503205128	1.63087063746439	1827408
2004-08-17	1.63921732549858	1.64756401353276	1.61974172008547	1.64756401353276	1160324
2004-08-18	1.65591070156695	1.68373299501425	1.64199955484331	1.64756401353276	3789165
2004-08-19	1.64478178418803	1.66147516025641	1.62530617877493	1.64756401353276	2211079
2004-08-20	1.66425738960114	1.6698218482906	1.63087063746439	1.64199955484331	2091954
2004-08-23	1.64478178418803	1.67538630698006	1.63643509615385	1.6698218482906	1632675
2004-08-24	1.65591070156695	1.66703961894587	1.63087063746439	1.63365286680912	1610465
2004-08-25	1.64199955484331	1.66703961894587	1.63643509615385	1.66147516025641	1001120
2004-08-26	1.61974172008547	1.64756401353276	1.61974172008547	1.64199955484331	2276229
2004-08-27	1.60861280270655	1.63365286680912	1.59748388532764	1.61417726139601	1834285
2004-08-30	1.63643509615385	1.65034624287749	1.59470165598291	1.60861280270655	1389317
2004-08-31	1.66425738960114	1.67538630698006	1.64478178418803	1.66425738960114	3017262
2004-09-01	1.62530617877493	1.66425738960114	1.61974172008547	1.66425738960114	1363167
2004-09-02	1.6225239494302	1.64199955484331	1.60026611467236	1.6225239494302	1969788
2004-09-03	1.61417726139601	1.63365286680912	1.61139503205128	1.6225239494302	1203302
2004-09-06	1.61139503205128	1.61695949074074	1.59470165598291	1.61695949074074	874812
2004-09-07	1.65034624287749	1.66147516025641	1.61417726139601	1.61417726139601	1065204
2004-09-08	1.64478178418803	1.65591070156695	1.6225239494302	1.65034624287749	1576484
2004-09-09	1.60026611467236	1.64478178418803	1.58635496794872	1.64478178418803	1992609
2004-09-10	1.63921732549858	1.64478178418803	1.58079050925926	1.58635496794872	2221713
2004-09-13	1.59470165598291	1.62530617877493	1.58079050925926	1.62530617877493	1724723
2004-09-14	1.64478178418803	1.66147516025641	1.59748388532764	1.59748388532764	3296183
2004-09-15	1.71155528846154	1.75328872863248	1.62808840811966	1.64478178418803	10484871
2004-09-16	1.717119747151	1.75328872863248	1.69764414173789	1.73381312321937	6518916
2004-09-17	1.7644176460114	1.77276433404558	1.70320860042735	1.72268420584046	9413043
2004-09-20	1.83397337962963	1.83675560897436	1.75328872863248	1.7644176460114	12619192
2004-09-21	1.80893331552707	1.85623121438746	1.78111102207977	1.84232006766382	10592669
2004-09-22	1.82006223290598	1.96473815883191	1.81449777421652	1.86457790242165	25243411
2004-09-23	1.8784890491453	1.88405350783476	1.75050649928775	1.81728000356125	9927847
2004-09-24	1.7838932514245	1.89240019586895	1.78111102207977	1.87014236111111	13240842
2004-09-27	1.70320860042735	1.83397337962963	1.69486191239316	1.78667548076923	7541152
2004-09-28	1.68095076566952	1.73103089387464	1.6698218482906	1.70320860042735	6612162
2004-09-29	1.65034624287749	1.69486191239316	1.64199955484331	1.6892974537037	7738576
2004-09-30	1.66425738960114	1.67538630698006	1.65034624287749	1.65591070156695	3435900
2004-10-08	1.67538630698006	1.68651522435897	1.60304834401709	1.67538630698006	4599061
2004-10-11	1.68651522435897	1.75607095797721	1.68373299501425	1.70320860042735	7560806
2004-10-12	1.63365286680912	1.68373299501425	1.62530617877493	1.68095076566952	5584093
2004-10-13	1.66147516025641	1.6698218482906	1.63365286680912	1.63365286680912	3129828
2004-10-14	1.58357273860399	1.66425738960114	1.58079050925926	1.66147516025641	6418701
2004-10-15	1.58913719729345	1.61974172008547	1.56966159188034	1.57800827991453	4226959
2004-10-18	1.55018598646724	1.60861280270655	1.52514592236467	1.59191942663818	5171091
2004-10-19	1.56409713319088	1.60583057336182	1.55296821581197	1.55296821581197	3556036
2004-10-20	1.51958146367521	1.56409713319088	1.48341248219373	1.56409713319088	4863995
2004-10-21	1.34430101495727	1.51679923433048	1.31369649216524	1.51401700498576	18523113
2004-10-22	1.29700311609687	1.34430101495727	1.23022961182336	1.34151878561254	11636248
2004-10-25	1.3192609508547	1.38325222578348	1.30813203347578	1.34151878561254	7117776
2004-10-26	1.33595432692308	1.34430101495727	1.28030974002849	1.31369649216524	4306938
2004-10-27	1.33873655626781	1.34151878561254	1.28865642806268	1.33595432692308	4813908
2004-10-28	1.34151878561254	1.36934107905983	1.32204318019943	1.34151878561254	5585743
2004-10-29	1.38881668447293	1.49454139957265	1.34708324430199	1.34986547364672	15695033
2004-11-01	1.40551006054131	1.43055012464387	1.34151878561254	1.38325222578348	6588158
2004-11-02	1.3665588497151	1.41107451923077	1.34986547364672	1.38325222578348	3845651
2004-11-03	1.37212330840456	1.39159891381766	1.34430101495727	1.36934107905983	3233340
2004-11-04	1.32760763888889	1.39716337250712	1.32204318019943	1.37212330840456	3670917
2004-11-05	1.33038986823362	1.37490553774929	1.32482540954416	1.3665588497151	2163213
2004-11-08	1.30534980413105	1.34151878561254	1.28587419871795	1.33595432692308	2886771
2004-11-09	1.30256757478633	1.3192609508547	1.28309196937322	1.31369649216524	2431946
2004-11-10	1.36934107905983	1.38046999643875	1.28865642806268	1.2997853454416	5454556
2004-11-11	1.35821216168091	1.39716337250712	1.35542993233618	1.38325222578348	7571504
2004-11-12	1.34430101495727	1.3665588497151	1.33595432692308	1.35542993233618	3597183
2004-11-15	1.36934107905983	1.39716337250712	1.34708324430199	1.34708324430199	3289490
2004-11-16	1.39716337250712	1.41107451923077	1.37490553774929	1.37768776709402	5179108
2004-11-17	1.36099439102564	1.41107451923077	1.35542993233618	1.39994560185185	2656919
2004-11-18	1.39438114316239	1.39716337250712	1.35264770299145	1.36377662037037	3027150
2004-11-19	1.45559018874644	1.480630252849	1.40272783119658	1.40272783119658	14905044
2004-11-22	1.44724350071225	1.46671910612536	1.42776789529915	1.45280795940171	4472557
2004-11-23	1.41663897792023	1.44724350071225	1.40551006054131	1.44724350071225	3386752
2004-11-24	1.38603445512821	1.43055012464387	1.38325222578348	1.42498566595442	3354974
2004-11-25	1.39716337250712	1.40829228988604	1.38046999643875	1.38046999643875	2276763
2004-11-26	1.39159891381766	1.40829228988604	1.38603445512821	1.39716337250712	1737280
2004-11-29	1.35821216168091	1.39438114316239	1.35542993233618	1.39159891381766	2346566
2004-11-30	1.35542993233618	1.36934107905983	1.33873655626781	1.34986547364672	2860793
2004-12-01	1.32482540954416	1.34986547364672	1.31369649216524	1.34986547364672	3752851
2004-12-02	1.34151878561254	1.34151878561254	1.31369649216524	1.32482540954416	2075607
2004-12-03	1.34708324430199	1.35821216168091	1.33595432692308	1.34151878561254	2154277
2004-12-06	1.33595432692308	1.35542993233618	1.32760763888889	1.34708324430199	1908971
2004-12-07	1.34151878561254	1.35821216168091	1.33038986823362	1.34151878561254	1966664
2004-12-08	1.33038986823362	1.36377662037037	1.32760763888889	1.34708324430199	2597571
2004-12-09	1.3665588497151	1.40829228988604	1.31369649216524	1.33038986823362	4328096
2004-12-10	1.32482540954416	1.3665588497151	1.32204318019943	1.36377662037037	2271061
2004-12-14	1.30534980413105	1.33317209757835	1.30256757478633	1.32204318019943	2262816
2004-12-15	1.33038986823362	1.33873655626781	1.2997853454416	1.30256757478633	2405056
2004-12-16	1.33873655626781	1.38881668447293	1.30534980413105	1.32760763888889	3622574
2004-12-17	1.31647872150997	1.35264770299145	1.31091426282051	1.3192609508547	2059533
2004-12-20	1.30256757478633	1.31647872150997	1.2997853454416	1.31369649216524	3002280
2004-12-21	1.30256757478633	1.32760763888889	1.28587419871795	1.30256757478633	2420394
2004-12-22	1.33317209757835	1.33595432692308	1.29422088675214	1.30256757478633	3833753
2004-12-23	1.30813203347578	1.34986547364672	1.30813203347578	1.32760763888889	1738410
2004-12-24	1.29143865740741	1.32204318019943	1.28587419871795	1.31091426282051	1769134
2004-12-27	1.2719630519943	1.29143865740741	1.2524874465812	1.29143865740741	2700952
2004-12-28	1.25526967592593	1.26918082264957	1.24414075854701	1.26918082264957	1850912
2004-12-29	1.24692298789174	1.26918082264957	1.24414075854701	1.25526967592593	2057579
2004-12-30	1.2246651531339	1.25526967592593	1.21631846509972	1.24692298789174	3678576
2004-12-31	1.22744738247863	1.24692298789174	1.2246651531339	1.2246651531339	1752143
2005-01-04	1.20797177706553	1.22744738247863	1.19127840099715	1.22744738247863	1760832
2005-01-05	1.19127840099715	1.21631846509972	1.16067387820513	1.20797177706553	3222144
2005-01-06	1.20797177706553	1.22744738247863	1.18849617165242	1.20240731837607	2666413
2005-01-07	1.2051895477208	1.23022961182336	1.19127840099715	1.2246651531339	1886151
2005-01-10	1.22744738247863	1.22744738247863	1.16623833689459	1.2051895477208	2632055
2005-01-12	1.21075400641026	1.23301184116809	1.19406063034188	1.23022961182336	1638669
2005-01-13	1.22188292378917	1.23022961182336	1.20240731837607	1.21075400641026	1600774
2005-01-14	1.20240731837607	1.23022961182336	1.19962508903134	1.2246651531339	1604770
2005-01-17	1.13285158475783	1.19406063034188	1.12172266737892	1.19406063034188	3171407
2005-01-18	1.12450489672365	1.14398050213675	1.10502929131054	1.13285158475783	2591786
2005-01-19	1.10781152065527	1.13285158475783	1.10502929131054	1.12450489672365	1685394
2005-01-20	1.06607808048433	1.10781152065527	1.05773139245014	1.10781152065527	3948938
2005-01-21	1.1773672542735	1.20240731837607	1.02156241096866	1.0632958511396	10037864
2005-01-24	1.19406063034188	1.24414075854701	1.16902056623932	1.23022961182336	6458370
2005-01-25	1.14954496082621	1.19127840099715	1.13841604344729	1.18849617165242	3500183
2005-01-26	1.14676273148148	1.19127840099715	1.13006935541311	1.14676273148148	2537556
2005-01-27	1.10224706196581	1.14676273148148	1.09390037393162	1.14398050213675	2525015
2005-01-28	1.11059375	1.11337597934473	1.07720699786325	1.09946483262108	2331278
2005-01-31	1.07998922720798	1.10502929131054	1.07164253917379	1.10502929131054	1857816
2005-02-01	1.08833591524217	1.11615820868946	1.07998922720798	1.08277145655271	2126785
2005-02-02	1.17458502492878	1.1773672542735	1.08833591524217	1.09111814458689	5696657
2005-02-03	1.14954496082621	1.18571394230769	1.14676273148148	1.17458502492878	4140780
2005-02-04	1.23022961182336	1.26918082264957	1.13006935541311	1.14676273148148	8917972
2005-02-16	1.22744738247863	1.2524874465812	1.21075400641026	1.23022961182336	4231699
2005-02-17	1.21910069444444	1.24135852920228	1.2051895477208	1.23022961182336	3027991
2005-02-18	1.23022961182336	1.2524874465812	1.21631846509972	1.2246651531339	3964630
2005-02-21	1.26083413461538	1.27752751068376	1.23857629985755	1.23857629985755	6460861
2005-02-22	1.26918082264957	1.27474528133903	1.23022961182336	1.26083413461538	7842572
2005-02-23	1.24970521723647	1.27752751068376	1.23301184116809	1.26918082264957	5119877
2005-02-24	1.23857629985755	1.2524874465812	1.22188292378917	1.2524874465812	4987234
2005-02-25	1.24135852920228	1.27474528133903	1.23857629985755	1.23857629985755	5657898
2005-02-28	1.19684285968661	1.24414075854701	1.18571394230769	1.24135852920228	5158778
2005-03-01	1.17458502492878	1.20240731837607	1.16902056623932	1.19684285968661	3363695
2005-03-02	1.16902056623932	1.19406063034188	1.16345610754986	1.17458502492878	3079848
2005-03-03	1.18571394230769	1.18849617165242	1.16067387820513	1.16902056623932	1779976
2005-03-04	1.16345610754986	1.18571394230769	1.15510941951567	1.18571394230769	2176119
2005-03-07	1.13006935541311	1.16902056623932	1.12728712606838	1.15510941951567	3173417
2005-03-08	1.16067387820513	1.16902056623932	1.13285158475783	1.16902056623932	4561920
2005-03-09	1.14398050213675	1.16902056623932	1.13006935541311	1.16345610754986	4356118
2005-03-10	1.10781152065527	1.14119827279202	1.09946483262108	1.14119827279202	4114598
2005-03-11	1.09668260327635	1.11059375	1.08555368589744	1.09111814458689	3626511
2005-03-14	1.08555368589744	1.11059375	1.06886030982906	1.09668260327635	3693345
2005-03-15	1.06051362179487	1.10502929131054	1.05216693376068	1.09111814458689	4332940
2005-03-16	1.0438202457265	1.0632958511396	1.03547355769231	1.06051362179487	3200931
2005-03-17	1.05494916310541	1.07164253917379	1.0438202457265	1.04660247507123	2874931
2005-03-18	1.0438202457265	1.07720699786325	1.03547355769231	1.0632958511396	3211023
2005-03-21	1.04660247507123	1.0632958511396	1.03547355769231	1.0438202457265	1841032
2005-03-22	0.935313301282051	1.0632958511396	0.926966613247863	1.06051362179487	5236209
2005-03-23	0.885233173076923	0.946442218660969	0.879668714387465	0.935313301282051	5965876
2005-03-24	0.896362090455841	0.910273237179487	0.874104255698006	0.888015402421653	5310820
2005-03-25	0.896362090455841	0.907491007834758	0.879668714387465	0.896362090455841	2548895
2005-03-28	0.868539797008547	0.896362090455841	0.851846420940171	0.890797631766382	2745045
2005-03-29	0.868539797008547	0.888015402421653	0.862975338319088	0.868539797008547	1924809
2005-03-30	0.81289521011396	0.868539797008547	0.798984063390313	0.868539797008547	4233671
2005-03-31	0.843499732905983	0.849064191595442	0.801766292735042	0.810112980769231	3408518
2005-04-01	0.952006677350427	0.988175658831909	0.818459668803419	0.840717503561254	7004655
2005-04-04	0.901926549145299	0.946442218660969	0.885233173076923	0.929748842592593	5368979
2005-04-05	0.921402154558404	0.954788906695157	0.896362090455841	0.901926549145299	4510296
2005-04-06	0.954788906695157	0.971482282763533	0.896362090455841	0.924184383903134	5285188
2005-04-07	1.11059375	1.11059375	0.979828970797721	0.979828970797721	25041593
2005-04-08	1.28309196937322	1.28309196937322	1.11337597934473	1.14398050213675	49716401
2005-04-11	1.32482540954416	1.45002573005698	1.23579407051282	1.28587419871795	55705101
2005-04-12	1.24135852920228	1.31647872150997	1.23579407051282	1.30813203347578	29134874
2005-04-13	1.30813203347578	1.37768776709402	1.2524874465812	1.25805190527066	41049501
2005-04-14	1.23022961182336	1.30534980413105	1.20797177706553	1.2997853454416	20330132
2005-04-15	1.23857629985755	1.27752751068376	1.16902056623932	1.20240731837607	18402621
2005-04-18	1.18293171296296	1.2246651531339	1.16067387820513	1.2246651531339	10199392
2005-04-19	1.2719630519943	1.28309196937322	1.1773672542735	1.18293171296296	19204568
2005-04-20	1.23857629985755	1.26918082264957	1.18849617165242	1.23022961182336	13212542
2005-04-22	1.05773139245014	1.17458502492878	1.05494916310541	1.10781152065527	24913014
2005-04-25	1.00486903490029	1.02156241096866	0.896362090455841	1.00765126424501	16440083
2005-04-26	1.07720699786325	1.09946483262108	0.979828970797721	0.999304576210827	14487460
2005-04-27	0.98539342948718	1.07720699786325	0.974264512108262	1.07720699786325	10979891
2005-04-28	1.02990909900285	1.06886030982906	0.918619925213676	0.979828970797721	13263365
2005-04-29	1.11894043803419	1.19406063034188	1.00765126424501	1.02990909900285	23627350
2005-05-09	1.08833591524217	1.13841604344729	1.05773139245014	1.12728712606838	9693911
2005-05-10	1.14954496082621	1.16345610754986	1.05494916310541	1.08833591524217	10841413
2005-05-11	1.11615820868946	1.17458502492878	1.09668260327635	1.14119827279202	10686837
2005-05-12	1.11615820868946	1.1578916488604	1.10224706196581	1.11337597934473	7939648
2005-05-13	1.06886030982906	1.13006935541311	1.03547355769231	1.11615820868946	11148138
2005-05-16	1.03547355769231	1.06886030982906	0.996522346866097	1.06886030982906	5446162
2005-05-17	1.07998922720798	1.10502929131054	1.01043349358974	1.03547355769231	6094428
2005-05-18	1.10224706196581	1.11894043803419	1.07442476851852	1.07998922720798	5204644
2005-05-19	1.11894043803419	1.13841604344729	1.06607808048433	1.10224706196581	7299406
2005-05-20	1.12172266737892	1.1578916488604	1.09668260327635	1.12450489672365	9881085
2005-05-23	1.05216693376068	1.10781152065527	1.05216693376068	1.09946483262108	8263800
2005-05-24	1.10781152065527	1.12728712606838	1.03825578703704	1.04938470441595	6993600
2005-05-25	1.11059375	1.14119827279202	1.09111814458689	1.11337597934473	5526770
2005-05-26	1.10224706196581	1.12172266737892	1.09668260327635	1.10781152065527	4368986
2005-05-27	1.10502929131054	1.14119827279202	1.09668260327635	1.10224706196581	5431951
2005-05-30	1.09111814458689	1.10502929131054	1.03547355769231	1.09111814458689	5804527
2005-05-31	1.06607808048433	1.10781152065527	1.04938470441595	1.09111814458689	5999522
2005-06-01	1.04938470441595	1.07442476851852	1.0438202457265	1.06607808048433	3859103
2005-06-02	1.00208680555556	1.06886030982906	0.979828970797721	1.04938470441595	7876474
2005-06-03	1.0159979522792	1.0632958511396	0.98261120014245	1.00208680555556	6644720
2005-06-06	1.04660247507123	1.05216693376068	0.98261120014245	1.01321572293447	4961684
2005-06-07	1.04660247507123	1.09111814458689	1.03547355769231	1.05773139245014	6965848
2005-06-08	1.19962508903134	1.21075400641026	1.0438202457265	1.0438202457265	22011618
2005-06-09	1.19684285968661	1.24135852920228	1.16902056623932	1.19962508903134	21271048
2005-06-10	1.2246651531339	1.32204318019943	1.17458502492878	1.18849617165242	25708353
2005-06-13	1.20240731837607	1.25805190527066	1.16902056623932	1.2246651531339	13763523
2005-06-14	1.17180279558405	1.25805190527066	1.16902056623932	1.20240731837607	10363322
2005-06-15	1.12450489672365	1.18014948361823	1.11615820868946	1.16067387820513	7263208
2005-06-16	1.16623833689459	1.18014948361823	1.12450489672365	1.12450489672365	6695361
2005-06-20	1.17180279558405	1.20240731837607	1.08277145655271	1.16345610754986	15249883
2005-06-21	1.17180279558405	1.21075400641026	1.14954496082621	1.18014948361823	9489547
2005-06-22	1.19684285968661	1.21075400641026	1.17180279558405	1.18014948361823	8766748
2005-06-23	1.12728712606838	1.20797177706553	1.11337597934473	1.19127840099715	11494922
2005-06-24	1.14398050213675	1.14676273148148	1.11337597934473	1.12450489672365	5276151
2005-06-27	1.18014948361823	1.20240731837607	1.16345610754986	1.17180279558405	11268956
2005-06-28	1.13285158475783	1.17458502492878	1.12450489672365	1.17458502492878	7199013
2005-06-29	1.12450489672365	1.15232719017094	1.12450489672365	1.14119827279202	3168320
2005-06-30	1.0438202457265	1.12450489672365	1.04103801638177	1.12172266737892	11105586
2005-07-01	1.00486903490029	1.04938470441595	0.990957888176638	1.04103801638177	7613441
2005-07-04	1.01878018162393	1.02156241096866	0.974264512108262	0.993740117521368	5568714
2005-07-05	0.996522346866097	1.02156241096866	0.98261120014245	1.00765126424501	2754874
2005-07-06	0.971482282763533	1.01321572293447	0.957571136039886	0.993740117521368	4210860
2005-07-07	0.968700053418804	0.988175658831909	0.957571136039886	0.957571136039886	2716718
2005-07-08	0.913055466524216	0.968700053418804	0.910273237179487	0.968700053418804	6766561
2005-07-11	0.921402154558404	0.971482282763533	0.910273237179487	0.924184383903134	4416530
2005-07-12	1.01043349358974	1.02990909900285	0.901926549145299	0.921402154558404	8090188
2005-07-13	0.988175658831909	1.01043349358974	0.98261120014245	1.00486903490029	4207730
2005-07-14	0.996522346866097	1.01321572293447	0.98261120014245	0.988175658831909	3405279
2005-07-15	0.968700053418804	1.00765126424501	0.952006677350427	0.990957888176638	3185215
2005-07-18	0.965917824074074	0.979828970797721	0.929748842592593	0.968700053418804	4436596
2005-07-19	0.98539342948718	1.00765126424501	0.938095530626781	0.965917824074074	5144999
2005-07-20	1.00486903490029	1.01321572293447	0.968700053418804	0.988175658831909	5571335
2005-07-21	1.00208680555556	1.00765126424501	0.979828970797721	1.00765126424501	2608965
2005-07-22	1.04938470441595	1.07720699786325	1.01043349358974	1.01043349358974	12614176
2005-07-25	1.04660247507123	1.06886030982906	1.02434464031339	1.04660247507123	5479140
2005-07-26	1.06607808048433	1.09111814458689	1.03825578703704	1.0438202457265	8602500
2005-07-27	1.08277145655271	1.08555368589744	1.0438202457265	1.06886030982906	7287598
2005-07-28	1.06886030982906	1.10502929131054	1.0632958511396	1.08277145655271	9522067
2005-07-29	1.0438202457265	1.07164253917379	1.03269132834758	1.0632958511396	6047233
2005-08-01	1.0438202457265	1.06051362179487	1.01321572293447	1.04103801638177	5332286
2005-08-02	1.06886030982906	1.07164253917379	1.02712686965812	1.04660247507123	6268306
2005-08-03	1.09111814458689	1.1578916488604	1.06607808048433	1.07442476851852	15543154
2005-08-04	1.07442476851852	1.10502929131054	1.06886030982906	1.08833591524217	6846038
2005-08-05	1.12450489672365	1.13285158475783	1.07442476851852	1.07442476851852	14919287
2005-08-08	1.13006935541311	1.14954496082621	1.11059375	1.13285158475783	9705430
2005-08-09	1.13841604344729	1.14119827279202	1.10502929131054	1.13285158475783	8456140
2005-08-10	1.14676273148148	1.16623833689459	1.12172266737892	1.14119827279202	11549194
2005-08-11	1.19406063034188	1.19962508903134	1.13841604344729	1.14676273148148	22532034
2005-08-12	1.11894043803419	1.19684285968661	1.11894043803419	1.19406063034188	16857487
2005-08-15	1.14676273148148	1.15510941951567	1.11059375	1.11894043803419	9768177
2005-08-16	1.10502929131054	1.15510941951567	1.09668260327635	1.14676273148148	11089302
2005-08-17	1.11615820868946	1.11894043803419	1.05773139245014	1.10502929131054	10451901
2005-08-18	1.06886030982906	1.14398050213675	1.0632958511396	1.11615820868946	13462937
2005-08-19	1.05494916310541	1.10224706196581	1.03547355769231	1.06886030982906	7819777
2005-08-22	1.07442476851852	1.08555368589744	1.04938470441595	1.06051362179487	4658779
2005-08-23	1.06051362179487	1.07720699786325	1.02712686965812	1.07442476851852	6612721
2005-08-24	1.07164253917379	1.08555368589744	1.05494916310541	1.05494916310541	4965580
2005-08-25	1.06607808048433	1.08277145655271	1.04660247507123	1.07442476851852	4317897
2005-08-26	1.10502929131054	1.11894043803419	1.05773139245014	1.0632958511396	9917291
2005-08-29	1.08555368589744	1.13006935541311	1.07720699786325	1.11337597934473	7683444
2005-08-30	1.09946483262108	1.12450489672365	1.08555368589744	1.10502929131054	8840462
2005-08-31	1.12728712606838	1.13006935541311	1.07998922720798	1.09946483262108	10091217
2005-09-01	1.14398050213675	1.1578916488604	1.11337597934473	1.13006935541311	15285947
2005-09-02	1.13563381410256	1.18571394230769	1.13006935541311	1.15510941951567	13273137
2005-09-05	1.14954496082621	1.15232719017094	1.11894043803419	1.13841604344729	7798013
2005-09-06	1.10502929131054	1.1578916488604	1.09946483262108	1.15510941951567	9047970
2005-09-07	1.12172266737892	1.12728712606838	1.08833591524217	1.10224706196581	8423887
2005-09-08	1.15232719017094	1.1773672542735	1.11337597934473	1.12172266737892	17995609
2005-09-09	1.13285158475783	1.18014948361823	1.12728712606838	1.14954496082621	9911621
2005-09-12	1.13006935541311	1.14398050213675	1.11337597934473	1.13563381410256	4957368
2005-09-13	1.15510941951567	1.1578916488604	1.11337597934473	1.13006935541311	8212424
2005-09-14	1.16902056623932	1.17458502492878	1.14676273148148	1.15232719017094	13442384
2005-09-15	1.14119827279202	1.17180279558405	1.13563381410256	1.16902056623932	8272999
2005-09-16	1.14676273148148	1.16623833689459	1.13563381410256	1.14398050213675	7281596
2005-09-19	1.14119827279202	1.15232719017094	1.12450489672365	1.14676273148148	6951378
2005-09-20	1.10224706196581	1.13841604344729	1.09946483262108	1.13841604344729	10565926
2005-09-21	1.07164253917379	1.11337597934473	1.06886030982906	1.10224706196581	8360385
2005-09-22	1.03547355769231	1.07442476851852	1.0159979522792	1.06886030982906	9389200
2005-09-23	1.02156241096866	1.04938470441595	1.0159979522792	1.03547355769231	4711101
2005-09-26	1.04660247507123	1.04938470441595	1.01043349358974	1.02156241096866	4100122
2005-09-27	0.996522346866097	1.06051362179487	0.993740117521368	1.06051362179487	5031324
2005-10-21	1.1578916488604	1.1578916488604	1.07442476851852	1.14119827279202	17706285
2005-10-24	1.13285158475783	1.2246651531339	1.12728712606838	1.22188292378917	37866940
2005-10-25	1.08555368589744	1.14676273148148	1.06607808048433	1.12450489672365	17457306
2005-10-26	1.04103801638177	1.10502929131054	1.02156241096866	1.09111814458689	13473362
2005-10-27	1.0159979522792	1.05216693376068	1.00208680555556	1.04103801638177	10013586
2005-10-28	0.946442218660969	1.02712686965812	0.926966613247863	1.01321572293447	10212402
2005-10-31	0.98261120014245	1.00208680555556	0.946442218660969	0.946442218660969	9095033
2005-11-01	0.979828970797721	0.990957888176638	0.952006677350427	0.977046741452992	4472116
2005-11-02	0.996522346866097	1.00486903490029	0.968700053418804	0.977046741452992	4438692
2005-11-03	0.971482282763533	1.00208680555556	0.954788906695157	0.999304576210827	4285176
2005-11-04	0.979828970797721	0.98261120014245	0.952006677350427	0.965917824074074	3127217
2005-11-07	0.98539342948718	0.988175658831909	0.960353365384616	0.98539342948718	3123434
2005-11-08	0.996522346866097	1.00208680555556	0.965917824074074	0.98539342948718	3279311
2005-11-09	0.98261120014245	1.00208680555556	0.968700053418804	0.996522346866097	2681452
2005-11-10	0.938095530626781	0.979828970797721	0.932531071937322	0.979828970797721	4369174
2005-11-11	0.935313301282051	0.952006677350427	0.926966613247863	0.938095530626781	2623860
2005-11-14	0.952006677350427	0.968700053418804	0.935313301282051	0.935313301282051	1678676
2005-11-15	0.954788906695157	0.971482282763533	0.946442218660969	0.954788906695157	2786674
2005-11-16	0.968700053418804	0.968700053418804	0.94365998931624	0.949224448005698	2354378
2005-11-17	0.974264512108262	0.979828970797721	0.960353365384616	0.974264512108262	3379501
2005-11-18	1.00208680555556	1.01043349358974	0.963135594729345	0.979828970797721	7559823
2005-11-21	0.990957888176638	1.00208680555556	0.98261120014245	1.00208680555556	3446140
2005-11-22	0.952006677350427	0.988175658831909	0.952006677350427	0.988175658831909	2989819
2005-11-23	0.968700053418804	0.971482282763533	0.94087775997151	0.946442218660969	2320456
2005-11-24	0.979828970797721	0.996522346866097	0.952006677350427	0.974264512108262	3510546
2005-11-25	1.02990909900285	1.03547355769231	0.971482282763533	0.98261120014245	13761255
2005-11-28	1.00486903490029	1.02990909900285	0.999304576210827	1.02990909900285	4656458
2005-11-29	1.00208680555556	1.02434464031339	0.993740117521368	0.993740117521368	3165767
2005-11-30	1.01878018162393	1.02156241096866	0.990957888176638	0.996522346866097	3648567
2005-12-01	1.00765126424501	1.02156241096866	0.999304576210827	1.01878018162393	2639365
2005-12-02	1.0159979522792	1.02156241096866	0.996522346866097	1.00486903490029	4323731
2005-12-05	0.957571136039886	1.00765126424501	0.954788906695157	1.00765126424501	4464117
2005-12-06	0.996522346866097	1.02156241096866	0.952006677350427	0.952006677350427	4980589
2005-12-07	1.01043349358974	1.0159979522792	0.988175658831909	0.996522346866097	4086209
2005-12-08	1.01043349358974	1.02990909900285	1.00208680555556	1.00765126424501	3502428
2005-12-09	1.02990909900285	1.04103801638177	0.999304576210827	1.01043349358974	7472858
2005-12-12	1.03547355769231	1.05773139245014	1.02156241096866	1.03547355769231	6441169
2005-12-13	1.03547355769231	1.03547355769231	1.0159979522792	1.02990909900285	3678946
2005-12-14	1.08277145655271	1.10781152065527	1.02712686965812	1.03547355769231	14480307
2005-12-15	1.0632958511396	1.09390037393162	1.06051362179487	1.08555368589744	13072279
2005-12-16	1.06607808048433	1.07164253917379	1.05216693376068	1.0632958511396	5690724
2005-12-19	1.06051362179487	1.07164253917379	1.04938470441595	1.06607808048433	4100696
2005-12-20	1.08833591524217	1.09946483262108	1.05773139245014	1.06051362179487	9381589
2005-12-21	1.07998922720798	1.12172266737892	1.07720699786325	1.08833591524217	11230304
2005-12-22	1.07998922720798	1.08833591524217	1.06607808048433	1.07720699786325	4850985
2005-12-23	1.09946483262108	1.10781152065527	1.07998922720798	1.07998922720798	7309066
2005-12-26	1.12728712606838	1.13841604344729	1.10224706196581	1.11337597934473	15872803
2005-12-27	1.11894043803419	1.12728712606838	1.10781152065527	1.12728712606838	5593362
2005-12-28	1.11059375	1.11894043803419	1.09946483262108	1.11894043803419	4870747
2005-12-29	1.12450489672365	1.13563381410256	1.10224706196581	1.11059375	7959788
2005-12-30	1.10224706196581	1.13006935541311	1.09946483262108	1.12728712606838	5638929
2006-01-04	1.14119827279202	1.15510941951567	1.09668260327635	1.09946483262108	15445068
2006-01-05	1.15232719017094	1.16067387820513	1.13006935541311	1.14676273148148	15385586
2006-01-06	1.1773672542735	1.20240731837607	1.16067387820513	1.17458502492878	23866399
2006-01-09	1.17180279558405	1.18571394230769	1.1578916488604	1.17458502492878	11022101
2006-01-10	1.14119827279202	1.16345610754986	1.10502929131054	1.16067387820513	21426743
2006-01-11	1.12728712606838	1.16067387820513	1.11894043803419	1.14119827279202	9749282
2006-01-12	1.14119827279202	1.14119827279202	1.11615820868946	1.12172266737892	6720529
2006-01-13	1.12172266737892	1.16067387820513	1.11337597934473	1.13285158475783	7996673
2006-01-16	1.08833591524217	1.11337597934473	1.08555368589744	1.11337597934473	9770421
2006-01-17	1.10224706196581	1.11337597934473	1.07720699786325	1.08833591524217	5454865
2006-01-18	1.12728712606838	1.13563381410256	1.09390037393162	1.10224706196581	6711604
2006-01-19	1.14119827279202	1.14676273148148	1.11337597934473	1.12728712606838	7959103
2006-01-20	1.12728712606838	1.15510941951567	1.11337597934473	1.15232719017094	6229093
2006-01-23	1.11337597934473	1.13285158475783	1.10224706196581	1.12728712606838	7077331
2006-01-24	1.13563381410256	1.13841604344729	1.10224706196581	1.10781152065527	8373949
2006-01-25	1.16067387820513	1.16345610754986	1.12728712606838	1.13285158475783	11559852
2006-02-06	1.17458502492878	1.19406063034188	1.15232719017094	1.16067387820513	10703127
2006-02-07	1.14676273148148	1.17458502492878	1.11894043803419	1.17458502492878	12094492
2006-02-08	1.14676273148148	1.14954496082621	1.11337597934473	1.13841604344729	7653700
2006-02-09	1.11615820868946	1.14398050213675	1.11337597934473	1.14119827279202	7277997
2006-02-10	1.12172266737892	1.13006935541311	1.10502929131054	1.11894043803419	5948896
2006-02-13	1.12172266737892	1.13563381410256	1.10781152065527	1.12172266737892	5438483
2006-02-14	1.12728712606838	1.14398050213675	1.10781152065527	1.11615820868946	5417638
2006-02-15	1.15232719017094	1.18571394230769	1.13841604344729	1.13841604344729	15188826
2006-02-16	1.11059375	1.14676273148148	1.11059375	1.14676273148148	9430067
2006-02-17	1.13006935541311	1.14119827279202	1.09946483262108	1.11059375	8606834
2006-02-20	1.14398050213675	1.16902056623932	1.11337597934473	1.13006935541311	11164054
2006-02-21	1.28309196937322	1.29700311609687	1.13563381410256	1.14398050213675	44875616
2006-02-22	1.28309196937322	1.2997853454416	1.24692298789174	1.27752751068376	36617400
2006-02-23	1.34430101495727	1.35821216168091	1.28030974002849	1.28587419871795	46486043
2006-02-24	1.34986547364672	1.35264770299145	1.31369649216524	1.34430101495727	26548048
2006-02-27	1.29143865740741	1.36934107905983	1.28587419871795	1.35542993233618	22834340
2006-02-28	1.29700311609687	1.31091426282051	1.23857629985755	1.28587419871795	18225604
2006-03-01	1.28030974002849	1.31091426282051	1.26918082264957	1.29700311609687	14252399
2006-03-02	1.21910069444444	1.28309196937322	1.19684285968661	1.28030974002849	20886736
2006-03-03	1.21353623575499	1.23301184116809	1.18293171296296	1.21353623575499	15489333
2006-03-06	1.21910069444444	1.24135852920228	1.20240731837607	1.20797177706553	9069964
2006-03-07	1.15232719017094	1.21910069444444	1.14954496082621	1.21910069444444	11510433
2006-03-08	1.16902056623932	1.18014948361823	1.13841604344729	1.14954496082621	8753546
2006-03-09	1.13006935541311	1.16902056623932	1.11615820868946	1.16902056623932	9681956
2006-03-10	1.11337597934473	1.14398050213675	1.10781152065527	1.12728712606838	10555706
2006-03-13	1.13841604344729	1.14398050213675	1.11059375	1.11894043803419	8684506
2006-03-14	1.11894043803419	1.13841604344729	1.11059375	1.13563381410256	7433603
2006-03-15	1.14119827279202	1.14119827279202	1.11894043803419	1.11894043803419	5990224
2006-03-16	1.14398050213675	1.16623833689459	1.13285158475783	1.14119827279202	7651911
2006-03-17	1.11894043803419	1.14954496082621	1.11894043803419	1.14398050213675	5947756
2006-03-20	1.14119827279202	1.14676273148148	1.10502929131054	1.11894043803419	6741831
2006-03-21	1.16067387820513	1.18014948361823	1.12728712606838	1.14119827279202	16267721
2006-03-22	1.16067387820513	1.1773672542735	1.14954496082621	1.16345610754986	7308055
2006-03-23	1.17458502492878	1.18571394230769	1.16067387820513	1.16067387820513	9236134
2006-03-24	1.14954496082621	1.18014948361823	1.14954496082621	1.17458502492878	7166145
2006-03-27	1.16067387820513	1.16345610754986	1.11615820868946	1.14954496082621	8876903
2006-03-28	1.17180279558405	1.1773672542735	1.15232719017094	1.16067387820513	9195163
2006-03-29	1.20240731837607	1.2246651531339	1.17180279558405	1.17458502492878	19039757
2006-03-30	1.16623833689459	1.21353623575499	1.14954496082621	1.19962508903134	12919177
2006-03-31	1.16623833689459	1.19406063034188	1.13563381410256	1.14676273148148	10364846
2006-04-03	1.1773672542735	1.19406063034188	1.14119827279202	1.15232719017094	12597876
2006-04-04	1.22188292378917	1.23857629985755	1.16623833689459	1.1773672542735	20124252
2006-04-05	1.23022961182336	1.24692298789174	1.2051895477208	1.22188292378917	19260170
2006-04-06	1.20797177706553	1.25526967592593	1.19962508903134	1.23857629985755	17804528
2006-04-07	1.19406063034188	1.21910069444444	1.1773672542735	1.20797177706553	11963006
2006-04-10	1.26918082264957	1.2719630519943	1.19684285968661	1.19684285968661	20038946
2006-04-11	1.3192609508547	1.34986547364672	1.24970521723647	1.26918082264957	31212451
2006-04-12	1.26918082264957	1.32204318019943	1.26361636396011	1.3192609508547	16022060
2006-04-13	1.23579407051282	1.29700311609687	1.23022961182336	1.26083413461538	15297093
2006-04-14	1.2997853454416	1.30256757478633	1.2246651531339	1.23301184116809	14024835
2006-04-17	1.29143865740741	1.31647872150997	1.2719630519943	1.2997853454416	13342339
2006-04-18	1.26918082264957	1.30813203347578	1.26361636396011	1.29143865740741	10931109
2006-04-19	1.30813203347578	1.33873655626781	1.24692298789174	1.27474528133903	22136712
2006-04-20	1.28309196937322	1.32760763888889	1.2719630519943	1.30534980413105	13980110
2006-04-21	1.29700311609687	1.31091426282051	1.26083413461538	1.28309196937322	17479371
2006-04-24	1.2051895477208	1.30256757478633	1.20240731837607	1.28587419871795	23766713
2006-04-25	1.17180279558405	1.20240731837607	1.14676273148148	1.20240731837607	17060363
2006-04-26	1.34986547364672	1.34986547364672	1.18293171296296	1.18571394230769	22845526
2006-04-27	1.43889681267806	1.49175917022792	1.37768776709402	1.42220343660969	85852460
2006-04-28	1.58635496794872	1.64478178418803	1.4138567485755	1.53349261039886	68498093
2006-05-08	1.58079050925926	1.63365286680912	1.53627483974359	1.58635496794872	41177149
2006-05-09	1.72824866452991	1.75885318732194	1.52514592236467	1.58635496794872	49556720
2006-05-10	1.70042637108262	1.80336885683761	1.63643509615385	1.71155528846154	41747767
2006-05-11	1.70877305911681	1.82840892094017	1.65869293091168	1.6892974537037	45781795
2006-05-12	1.76998210470085	1.81449777421652	1.70042637108262	1.71155528846154	37563908
2006-05-15	1.79502216880342	1.81449777421652	1.71155528846154	1.76163541666667	35106447
2006-05-16	1.67538630698006	1.78667548076923	1.63643509615385	1.77276433404558	35257481
2006-05-17	1.68373299501425	1.75050649928775	1.64756401353276	1.67816853632479	26521525
2006-05-18	1.64756401353276	1.6892974537037	1.58913719729345	1.68651522435897	23285729
2006-05-19	1.70599082977208	1.73103089387464	1.62808840811966	1.64756401353276	25250546
2006-05-22	1.67816853632479	1.70599082977208	1.65312847222222	1.69207968304843	25645520
2006-05-23	1.57800827991453	1.66425738960114	1.5752260505698	1.66147516025641	23388148
2006-05-24	1.62808840811966	1.69486191239316	1.57800827991453	1.58079050925926	26290136
2006-05-25	1.67538630698006	1.6892974537037	1.59191942663818	1.62808840811966	21102843
2006-05-26	1.83675560897436	1.89518242521368	1.68373299501425	1.6892974537037	70907528
2006-06-12	1.59191942663818	1.59191942663818	1.59191942663818	1.59191942663818	2268700
2006-06-13	1.37212330840456	1.42498566595442	1.37212330840456	1.37212330840456	86724024
2006-06-14	1.37768776709402	1.39159891381766	1.2997853454416	1.36934107905983	30477297
2006-06-16	1.37212330840456	1.41663897792023	1.36099439102564	1.39994560185185	29245189
2006-06-19	1.36099439102564	1.38325222578348	1.28587419871795	1.35542993233618	20085645
2006-06-20	1.37490553774929	1.38603445512821	1.33317209757835	1.35821216168091	20226315
2006-06-21	1.39159891381766	1.39994560185185	1.36377662037037	1.37490553774929	23893423
2006-06-22	1.45280795940171	1.47506579415954	1.38325222578348	1.39159891381766	36133933
2006-06-23	1.42220343660969	1.44446127136752	1.40829228988604	1.44446127136752	18723688
2006-06-27	1.45280795940171	1.4611546474359	1.41942120726496	1.42220343660969	20926052
2006-06-28	1.42776789529915	1.45280795940171	1.42220343660969	1.45280795940171	19449862
2006-06-29	1.47228356481481	1.47784802350427	1.41663897792023	1.42498566595442	22213409
2006-06-30	1.49732362891738	1.53071038105413	1.47506579415954	1.47784802350427	22363506
2006-07-03	1.64756401353276	1.67538630698006	1.49732362891738	1.49732362891738	32548812
2006-07-04	1.63087063746439	1.66425738960114	1.57800827991453	1.65034624287749	22946586
2006-07-05	1.63365286680912	1.68373299501425	1.61974172008547	1.63087063746439	26759764
2006-07-06	1.60583057336182	1.63365286680912	1.58635496794872	1.63365286680912	21130295
2006-07-07	1.53905706908832	1.60583057336182	1.50288808760684	1.60583057336182	26144709
2006-07-19	1.38325222578348	1.480630252849	1.35542993233618	1.43889681267806	12388312
2006-07-20	1.38881668447293	1.4138567485755	1.37212330840456	1.38325222578348	5990928
2006-07-21	1.39716337250712	1.43889681267806	1.39159891381766	1.39159891381766	6403408
2006-07-24	1.4138567485755	1.41942120726496	1.35542993233618	1.38881668447293	4184724
2006-07-25	1.40551006054131	1.43055012464387	1.39994560185185	1.41107451923077	7054983
2006-07-26	1.38603445512821	1.41107451923077	1.37490553774929	1.40551006054131	8159783
2006-07-27	1.35821216168091	1.40551006054131	1.34430101495727	1.38325222578348	14241063
2006-07-28	1.33038986823362	1.37490553774929	1.30534980413105	1.35542993233618	11125200
2006-07-31	1.26361636396011	1.3192609508547	1.25526967592593	1.31369649216524	11464067
2006-08-01	1.25805190527066	1.28587419871795	1.23022961182336	1.26639859330484	6805200
2006-08-02	1.29143865740741	1.2997853454416	1.24414075854701	1.25805190527066	6441897
2006-08-03	1.29700311609687	1.31369649216524	1.2719630519943	1.30256757478633	4745556
2006-08-04	1.24970521723647	1.30813203347578	1.24970521723647	1.2997853454416	4071541
2006-08-07	1.21910069444444	1.28030974002849	1.21631846509972	1.24414075854701	5402803
2006-08-08	1.28309196937322	1.28587419871795	1.23022961182336	1.23022961182336	6308664
2006-08-09	1.26918082264957	1.29422088675214	1.26361636396011	1.28587419871795	3899678
2006-08-10	1.2997853454416	1.30256757478633	1.26083413461538	1.26639859330484	4779887
2006-08-11	1.29143865740741	1.30813203347578	1.28587419871795	1.30813203347578	3200139
2006-08-14	1.28865642806268	1.32760763888889	1.28030974002849	1.29422088675214	6074074
2006-08-15	1.31369649216524	1.3192609508547	1.2719630519943	1.29143865740741	4683721
2006-08-16	1.34986547364672	1.35821216168091	1.31369649216524	1.3192609508547	7128341
2006-08-17	1.3665588497151	1.36934107905983	1.31647872150997	1.34986547364672	5522451
2006-08-18	1.32204318019943	1.36934107905983	1.30813203347578	1.3665588497151	6761147
2006-08-21	1.36377662037037	1.36934107905983	1.24692298789174	1.29422088675214	6835390
2006-08-22	1.35821216168091	1.38881668447293	1.34708324430199	1.35264770299145	5778577
2006-08-23	1.35821216168091	1.39159891381766	1.34708324430199	1.34986547364672	7103428
2006-08-24	1.35264770299145	1.36377662037037	1.3192609508547	1.36099439102564	8264996
2006-08-25	1.33873655626781	1.36099439102564	1.33038986823362	1.35264770299145	3820054
2006-08-28	1.41942120726496	1.43889681267806	1.33038986823362	1.34151878561254	15935746
2006-08-29	1.39994560185185	1.45002573005698	1.38603445512821	1.42220343660969	10488529
2006-08-30	1.39994560185185	1.41107451923077	1.38325222578348	1.39994560185185	5117794
2006-08-31	1.40551006054131	1.4333323539886	1.38603445512821	1.39994560185185	7203289
2006-09-01	1.35821216168091	1.40551006054131	1.34430101495727	1.39994560185185	6189579
2006-09-04	1.36934107905983	1.37490553774929	1.35264770299145	1.35821216168091	4604299
2006-09-05	1.37490553774929	1.41107451923077	1.35821216168091	1.37212330840456	11325733
2006-09-06	1.38603445512821	1.38881668447293	1.36099439102564	1.37212330840456	5936118
2006-09-07	1.39716337250712	1.4333323539886	1.36934107905983	1.38603445512821	13216218
2006-09-08	1.40551006054131	1.4138567485755	1.38325222578348	1.39716337250712	7639625
2006-09-11	1.45837241809117	1.46671910612536	1.38046999643875	1.38046999643875	20246635
2006-09-12	1.4611546474359	1.48897694088319	1.44167904202279	1.45837241809117	13260586
2006-09-13	1.45280795940171	1.50288808760684	1.43889681267806	1.45837241809117	17360571
2006-09-14	1.480630252849	1.53349261039886	1.45002573005698	1.45280795940171	19215542
2006-09-15	1.51679923433048	1.52236369301994	1.46671910612536	1.480630252849	19595090
2006-09-18	1.51401700498576	1.54462152777778	1.49732362891738	1.53627483974359	11921680
2006-09-19	1.53905706908832	1.56966159188034	1.50288808760684	1.51401700498576	15553289
2006-09-20	1.53071038105413	1.54462152777778	1.51679923433048	1.53627483974359	8474604
2006-09-21	1.53905706908832	1.57244382122507	1.53071038105413	1.53071038105413	11019187
2006-09-22	1.47784802350427	1.56409713319088	1.45280795940171	1.54183929843305	16415420
2006-09-25	1.50567031695157	1.52514592236467	1.45559018874644	1.45837241809117	10175551
2006-09-26	1.50010585826211	1.51123477564103	1.480630252849	1.50010585826211	6416015
2006-09-27	1.6225239494302	1.64199955484331	1.49175917022792	1.50010585826211	25306138
2006-09-28	1.60583057336182	1.62530617877493	1.57800827991453	1.61974172008547	15572360
2006-09-29	1.66425738960114	1.69207968304843	1.60026611467236	1.60861280270655	26377105
2006-10-09	1.81171554487179	1.82562669159544	1.70320860042735	1.70877305911681	35407242
2006-10-13	1.90631134259259	2.02316497507122	1.80058662749288	1.80893331552707	54044520
2006-10-16	1.85344898504274	1.95360924145299	1.85066675569801	1.90909357193732	24645951
2006-10-17	1.89518242521368	1.91465803062678	1.81728000356125	1.84510229700855	20149021
2006-10-18	1.92300471866097	1.94804478276353	1.86736013176638	1.88961796652422	17477925
2006-10-19	1.88405350783476	1.9257869480057	1.87570681980057	1.9257869480057	13070593
2006-10-20	1.91744025997151	1.93969809472935	1.87014236111111	1.87292459045584	18440445
2006-10-23	1.90631134259259	1.98699599358974	1.87292459045584	1.92022248931624	24565830
2006-10-24	2.01203605769231	2.03707612179487	1.8979646545584	1.90074688390313	34873578
2006-10-25	2.03707612179487	2.08159179131054	2.00368936965812	2.01203605769231	30020980
2006-10-26	2.12610746082621	2.14280083689459	2.01481828703704	2.05376949786325	41079195
2006-10-27	2.11219631410256	2.24574332264957	2.09272070868946	2.11776077279202	43165159
2006-10-30	2.00925382834758	2.12888969017094	1.96752038817664	2.06211618589744	30872772
2006-10-31	2.05098726851852	2.08159179131054	1.99534268162393	2.00925382834758	21955017
2006-11-01	1.98143153490029	2.06211618589744	1.96473815883191	2.05098726851852	21191144
2006-11-02	1.99812491096866	1.99812491096866	1.9257869480057	1.98143153490029	18590416
2006-11-03	2.05933395655271	2.11776077279202	1.97030261752137	1.98977822293447	24406235
2006-11-06	2.13723637820513	2.17062313034188	2.00368936965812	2.01481828703704	23225195
2006-11-07	2.18453427706553	2.21235657051282	2.13167191951567	2.14280083689459	23897307
2006-11-08	2.18731650641026	2.22348548789174	2.13723637820513	2.18453427706553	26651798
2006-11-09	2.30138790954416	2.3431213497151	2.1539297542735	2.17618758903134	39046913
2006-11-10	2.26521892806268	2.3904192485755	2.22348548789174	2.31529905626781	37930198
2006-11-13	2.19844542378917	2.32921020299145	2.17340535968661	2.2485255519943	22719245
2006-11-14	2.19288096509971	2.25965446937322	2.14280083689459	2.21792102920228	28472657
2006-11-15	2.28747676282051	2.2958234508547	2.16505867165242	2.19844542378917	23771158
2006-11-16	2.29025899216524	2.36816141381766	2.27078338675214	2.29025899216524	32976498
2006-11-17	2.25409001068376	2.30973459757835	2.22070325854701	2.28747676282051	18036400
2006-11-20	2.38485478988604	2.39876593660969	2.25687224002849	2.26243669871795	32719951
2006-11-21	2.68533555911681	2.68533555911681	2.30973459757835	2.38207256054131	82009760
2006-11-22	2.97746964031339	3.01085639245014	2.66029549501425	2.69646447649573	67891371
2006-11-23	2.91347836538462	3.06093652065527	2.8745271545584	2.97746964031339	48399487
2006-11-24	2.9218250534188	3.00250970441595	2.8077536502849	2.90513167735043	41744785
2006-11-27	2.89400275997151	2.97746964031339	2.79384250356125	2.88843830128205	34337581
2006-11-28	2.82166479700855	2.91626059472934	2.81053587962963	2.87730938390313	20473058
2006-11-29	2.83557594373219	2.87174492521368	2.67977110042735	2.67977110042735	29523964
2006-11-30	2.91347836538462	2.9218250534188	2.79940696225071	2.84392263176638	32717618
2006-12-01	2.84948709045584	2.94686511752137	2.83835817307692	2.91626059472934	23039510
2006-12-04	3.05258983262108	3.11658110754986	2.79106027421652	2.84392263176638	42545318
2006-12-05	2.99694524572649	3.08875881410256	2.95521180555556	3.05258983262108	40779155
2006-12-06	3.03589645655271	3.14996785968661	2.87174492521368	3.01085639245014	41050172
2006-12-07	3.12214556623932	3.32524830840456	3.04146091524216	3.04146091524216	53340156
2006-12-08	3.04980760327635	3.17222569444444	2.99972747507123	3.03867868589744	34047311
2006-12-11	3.16109677706553	3.21952359330484	3.04146091524216	3.04424314458689	30158134
2006-12-12	3.2723859508547	3.35585283119658	3.16387900641026	3.20839467592593	40632628
2006-12-13	3.12492779558404	3.31133716168091	3.07484766737892	3.29186155626781	41228295
2006-12-14	3.11658110754986	3.18057238247863	3.06093652065527	3.10823441951567	35891253
2006-12-15	3.10823441951567	3.14996785968661	2.99972747507123	3.14996785968661	29484931
2006-12-18	3.17222569444444	3.21674136396011	3.06371875	3.10823441951567	27334359
2006-12-19	3.17222569444444	3.32803053774929	3.11658110754986	3.15553231837607	35093911
2006-12-20	3.15275008903134	3.18891907051282	3.06650097934473	3.16944346509971	18672270
2006-12-21	3.05537206196581	3.16387900641026	3.03867868589744	3.15275008903134	35803634
2006-12-22	3.01363862179487	3.1110166488604	2.98581632834758	3.04980760327635	21685306
2006-12-25	3.10823441951567	3.23343474002849	2.98303409900285	2.99416301638177	38765743
2006-12-26	3.07484766737892	3.14440340099715	3.03311422720798	3.12214556623932	20186167
2006-12-27	3.20283021723647	3.26125703347578	3.03867868589744	3.07484766737892	36787477
2006-12-28	3.29464378561254	3.42819079415954	3.20283021723647	3.21952359330484	53476036
2006-12-29	3.41984410612536	3.47827092236467	3.31133716168091	3.33081276709402	50242799
2007-01-04	3.3196838497151	3.65633360042735	3.24178142806268	3.46992423433048	69207082
2007-01-05	3.02754976851852	3.26960372150997	3.01085639245014	3.26960372150997	53732890
2007-01-08	3.11379887820513	3.16109677706553	3.0164208511396	3.02476753917379	31761560
2007-01-09	3.23343474002849	3.25569257478632	3.09432327279202	3.11936333689459	47968021
2007-01-10	3.31133716168091	3.35307060185185	3.1777901531339	3.23065251068376	44737422
2007-01-11	3.50609321581197	3.50609321581197	3.31411939102564	3.3391594551282	40996055
2007-01-12	3.71197818732194	3.71197818732194	3.53947996794872	3.59790678418803	90902123
2007-01-15	3.92899207621083	3.92899207621083	3.57843117877493	3.70641372863248	55236455
2007-01-16	4.12931258903134	4.15713488247863	3.98463666310541	3.98463666310541	52523640
2007-01-17	4.12931258903134	4.28789966168091	3.95681436965812	4.12374813034188	45910806
2007-01-18	3.89560532407407	4.15713488247863	3.89282309472935	4.10983698361823	48969519
2007-01-19	4.10983698361823	4.12096590099715	3.90116978276353	3.90116978276353	47932790
2007-01-22	4.33519756054131	4.34632647792023	4.1543526531339	4.1543526531339	54038875
2007-01-23	4.42979335826211	4.4854379451567	4.20999724002849	4.26285959757835	50369492
2007-01-24	4.32128641381766	4.54108253205128	4.27398851495726	4.40197106481481	44248617
2007-01-25	4.23503730413105	4.42144667022792	4.22669061609687	4.34632647792023	48436276
2007-01-26	4.47709125712251	4.47709125712251	4.29068189102564	4.4576156517094	62425541
2007-01-29	4.73027412749288	4.73027412749288	4.65237170584046	4.65237170584046	27014435
2007-01-30	4.9973681445869	4.9973681445869	4.93059464031339	4.99458591524217	29635567
2007-01-31	4.71636298076923	5.23107540954416	4.71636298076923	5.23107540954416	73196002
2007-02-01	4.52995361467237	4.66906508190883	4.44926896367521	4.55777590811966	66285498
2007-02-02	4.27398851495726	4.58559820156695	4.27398851495726	4.45205119301994	39611049
2007-02-05	4.03749902065527	4.29902857905983	4.02915233262108	4.20721501068376	39927406
2007-02-06	4.26842405626781	4.26842405626781	4.02915233262108	4.03749902065527	28237726
2007-02-07	4.51326023860399	4.51326023860399	4.51326023860399	4.51326023860399	5916647
2007-02-08	4.70801629273504	4.76922533831909	4.42979335826211	4.51326023860399	64727854
2007-02-09	4.51047800925926	4.73583858618234	4.47987348646724	4.72749189814815	30926290
2007-02-12	4.76644310897436	4.76644310897436	4.50213132122507	4.50213132122507	25159809
2007-02-13	4.86382113603989	5.01406152065527	4.79148317307692	4.95841693376068	24394451
2007-02-14	5.1114395477208	5.12256846509972	4.84712775997151	4.92503018162393	27999331
2007-02-15	5.10031063034188	5.28393776709402	5.01406152065527	5.13926184116809	31972344
2007-02-16	5.18099528133903	5.34792904202279	5.11700400641026	5.15317298789174	27975051
2007-02-26	5.01684375	5.09752840099715	4.90833680555556	5.06970610754986	21393632
2007-02-27	4.73583858618234	5.1782130519943	4.73583858618234	5.01406152065527	22746641
2007-02-28	4.6941051460114	4.73027412749288	4.46874456908832	4.46874456908832	43811486
2007-03-01	4.42979335826211	4.68019399928775	4.42979335826211	4.68019399928775	22927483
2007-03-02	4.45483342236467	4.5049135505698	4.276770744302	4.37693100071225	20750706
2007-03-05	4.26564182692308	4.47709125712251	4.2016505519943	4.41588221153846	31385015
2007-03-06	4.51047800925926	4.51047800925926	4.26564182692308	4.26842405626781	28507821
2007-03-07	4.5716870548433	4.65237170584046	4.4854379451567	4.51326023860399	28029635
2007-03-08	4.65237170584046	4.80539431980057	4.5716870548433	4.59394488960114	18552006
2007-03-09	4.66906508190883	4.73583858618234	4.56334036680912	4.65237170584046	21954379
2007-03-12	4.51326023860399	4.68019399928775	4.41588221153846	4.6662828525641	15982161
2007-03-13	4.54942922008547	4.61620272435897	4.50213132122507	4.51326023860399	13520785
2007-03-14	4.39918883547008	4.4854379451567	4.34632647792023	4.4854379451567	18252022
2007-03-15	4.5049135505698	4.51326023860399	4.38805991809117	4.38805991809117	14248334
2007-03-16	4.41588221153846	4.54386476139601	4.38527768874644	4.50769577991453	18641612
2007-03-19	4.6662828525641	4.6662828525641	4.29068189102564	4.33797978988604	27595802
2007-03-20	4.66350062321937	4.79148317307692	4.65237170584046	4.79148317307692	25024333
2007-03-21	4.92781241096866	4.92781241096866	4.70245183404558	4.71914521011396	35862050
2007-03-22	4.94450578703704	5.20325311609687	4.81930546652422	5.03910158475783	54898793
2007-03-23	4.78591871438747	4.88886120014245	4.6662828525641	4.86103890669516	35862049
2007-03-26	4.72470966880342	4.77200756766382	4.54386476139601	4.68019399928775	28182462
2007-03-27	4.67741176994302	4.70801629273504	4.61063826566952	4.68019399928775	23566174
2007-03-28	4.70245183404558	4.78591871438747	4.41309998219373	4.65793616452992	41538426
2007-03-29	4.72470966880342	4.96398139245014	4.65515393518519	4.69966960470085	58951589
2007-03-30	4.646807247151	4.68019399928775	4.56055813746439	4.646807247151	21638160
2007-04-02	4.75809642094017	4.84712775997151	4.6662828525641	4.67462954059829	31360278
2007-04-03	4.77757202635328	4.86938559472934	4.72749189814815	4.76644310897436	25328363
2007-04-04	4.92781241096866	5.01406152065527	4.79148317307692	4.79148317307692	40243715
2007-04-05	4.94728801638177	4.97789253917379	4.83599884259259	4.92781241096866	29075555
2007-04-06	4.83878107193732	4.93059464031339	4.77757202635328	4.86382113603989	26554073
2007-04-09	4.88051451210826	4.95285247507123	4.79148317307692	4.83878107193732	22376321
2007-04-10	5.03910158475783	5.04188381410257	4.8554744480057	4.88051451210826	34751591
2007-04-11	5.31732451923077	5.3201067485755	5.05023050213675	5.05023050213675	59411003
2007-04-12	5.61224082977208	5.61224082977208	5.3201067485755	5.34792904202279	46382562
2007-04-13	5.92385051638176	5.92385051638176	5.70961885683761	5.70961885683761	36148752
2007-04-16	5.99618847934473	6.2020734508547	5.76526344373219	6.06574421296296	36826020
2007-04-17	5.77917459045584	5.99618847934473	5.66510318732194	5.9461083511396	35539117
2007-04-18	5.79030350783476	5.90437491096866	5.66232095797721	5.75969898504274	20469190
2007-04-19	5.47034713319088	5.80977911324786	5.47034713319088	5.70961885683761	35264191
2007-04-20	5.68179656339031	5.75413452635328	5.34236458333333	5.34236458333333	22926799
2007-04-23	5.99618847934473	5.99618847934473	5.59832968304843	5.70127216880342	38138414
2007-04-24	5.94054389245014	6.1547755519943	5.92106828703704	6.11582434116809	34033433
2007-04-25	6.26884695512821	6.26884695512821	5.8042146545584	5.91828605769231	45918037
2007-04-26	6.61384339387464	6.61384339387464	6.40795842236467	6.56932772435897	47077758
2007-05-08	6.97553320868946	6.97553320868946	6.68339912749288	6.68339912749288	25374071
2007-05-09	7.02004887820513	7.25653837250712	6.59715001780627	7.18420040954416	49926386
2007-05-10	6.85033288817664	7.09516907051282	6.76686600783476	6.85311511752137	27752980
2007-05-11	7.14246696937322	7.21202270299145	6.63888345797721	6.76408377849003	25931276
2007-05-25	7.5291968482906	7.5291968482906	7.51528570156695	7.5291968482906	47968371
2007-05-28	7.35113417022792	7.87419328703704	7.34556971153846	7.87419328703704	60331556
2007-05-29	7.39564983974359	7.56814805911681	7.19532932692307	7.45685888532763	44421042
2007-05-30	6.99500881410256	7.20924047364672	6.99500881410256	6.99500881410256	50509818
2007-05-31	7.37617423433048	7.37617423433048	6.71122142094017	6.90875970441595	90502870
2007-06-20	8.07173157051282	8.65878196225071	7.92427341524216	8.57531508190883	130252684
2007-06-21	8.93978712606838	8.93978712606838	8.0884249465812	8.41951023860399	68168182
2007-06-22	9.24305012464388	9.35433929843305	8.79789342948718	9.29869471153846	78994405
2007-06-25	9.18740553774929	9.57135318732194	8.95091604344729	9.41276611467237	66012025
2007-06-27	8.35830119301994	8.79511120014245	8.20806080840456	8.20806080840456	75775141
2007-06-28	7.77959748931624	8.40003463319088	7.74899296652422	8.15798068019943	52116542
2007-06-29	7.05065340099715	7.73508181980057	6.96718652065527	7.68500169159544	48968722
2007-07-02	7.0172666488604	7.14524919871795	6.78634161324786	6.85311511752137	32376147
2007-07-03	6.96996875	7.2259338497151	6.83085728276353	7.05900008903134	25253297
2007-07-04	6.68339912749288	7.05900008903134	6.65557683404558	7.03117779558404	24396028
2007-07-05	6.40517619301994	6.86980849358974	6.38848281695157	6.54428766025641	37158795
2007-07-06	6.90875970441595	6.93936422720798	6.46360300925926	6.48864307336182	44071420
2007-07-09	7.21202270299145	7.32331187678062	6.90597747507123	6.9894443554131	27259521
2007-07-10	7.30940073005698	7.55980137108262	7.18420040954416	7.18420040954416	33547092
2007-07-11	7.21758716168091	7.36782754629629	7.18698263888889	7.29548958333333	11424753
2007-07-12	7.39286761039886	7.50972124287749	7.25375614316239	7.25375614316239	15205761
2007-07-13	7.28157843660969	7.46242334401709	7.19254709757835	7.46242334401709	7528854
2007-07-16	6.7807771545584	7.23984499643874	6.77521269586895	7.23984499643874	17613547
2007-07-17	7.50415678418803	7.51250347222222	6.96162206196581	7.0172666488604	32957137
2007-07-18	7.80741978276353	8.07451379985755	7.35948085826211	7.46242334401709	56388959
2007-07-19	7.87419328703704	8.09955386396011	7.65439716880342	7.71282398504273	30302852
2007-07-23	8.56140393518519	8.686604255698	8.23031864316239	8.686604255698	52801621
2007-07-24	8.67547533831909	9.03438292378917	8.43620361467237	8.56975062321937	34924283
2007-07-25	9.18740553774929	9.23748566595442	8.67547533831909	8.67547533831909	34852682
2007-07-26	9.12897872150997	9.27087241809117	9.06220521723647	9.1317609508547	26751068
2007-07-27	8.81180457621083	9.09002751068376	8.7144265491453	9.06220521723647	33739135
2007-07-30	8.90918260327635	9.15401878561254	8.74224884259259	8.77007113603989	24488239
2007-07-31	9.47397516025641	9.52127305911681	8.75615998931624	8.81180457621083	41820351
2007-08-01	9.13454318019943	9.71602911324787	8.96760941951567	9.47953961894587	29143344
2007-08-02	9.88296287393163	9.92469631410257	9.21522783119658	9.21522783119658	39658389
2007-08-03	10.2752572115385	10.3976753027065	9.93304300213675	9.9664297542735	43827170
2007-08-06	10.2947328169516	10.4922711004273	10.0387677172365	10.2418704594017	25817796
2007-08-07	10.2724749821937	10.3698530092593	10.0415499465812	10.2307415420228	15632214
2007-08-08	10.1945725605413	10.6619870904558	9.9664297542735	10.0498966346154	26142523
2007-08-09	10.5256578525641	10.5506979166667	10.1138879095442	10.1945725605413	30803008
2007-08-10	10.2446526887464	10.5506979166667	10.0999767628205	10.4672310363248	18578181
2007-08-13	10.2724749821937	10.5228756232194	9.9664297542735	10.10554122151	26055802
2007-08-14	10.063807781339	10.3364662571225	9.68542459045584	10.300297275641	34927384
2007-08-15	9.9664297542735	10.239088230057	9.81340714031339	10.0777189280627	24604524
2007-08-16	9.47953961894587	9.98034090099715	9.34599261039886	9.97199421296297	38534807
2007-08-17	9.09837419871795	9.66038452635328	8.95926273148148	9.40720165598291	42068519
2007-08-20	9.93860746082621	10.0081631944444	9.40998388532763	9.40998388532763	36638584
2007-08-21	10.1222345975783	10.3169906517094	9.88296287393163	10.0916300747863	33599021
2007-08-22	10.1305812856125	10.4060219907407	9.86348726851852	9.92469631410257	31534169
2007-08-23	10.0749366987179	10.1890081018519	9.88296287393163	10.0777189280627	26457769
2007-08-24	10.4115864494302	10.5284400819088	10.0220743411681	10.0610255519943	38945697
2007-08-27	10.300297275641	10.7621473468661	10.0805011574074	10.4060219907407	27509618
2007-08-28	9.96364752492877	10.1890081018519	9.82731828703704	10.1111056801994	31333584
2007-08-29	9.6436911502849	9.87739841524217	9.5769176460114	9.82175382834758	26720876
2007-08-30	9.88296287393163	9.98868758903134	9.57135318732194	9.76610924145299	24682722
2007-08-31	9.9664297542735	9.9942520477208	9.67429567307692	9.86905172720797	17383461
2007-09-03	9.93304300213675	10.1277990562678	9.92747854344729	9.9942520477208	19369706
2007-09-04	9.68820681980057	9.92469631410257	9.60473993945869	9.91634962606838	23152879
2007-09-05	9.62978000356125	9.76610924145299	9.42111280270655	9.68820681980057	21830307
2007-09-06	9.74385140669516	9.99981650641026	9.60473993945869	9.69377127849003	19072119
2007-09-07	9.71602911324787	9.9664297542735	9.68820681980057	9.77167370014245	15748450
2007-09-10	9.84122943376068	9.93582523148148	9.45728178418804	9.56300649928775	16844567
2007-09-11	9.37103267450142	9.93304300213675	9.37103267450142	9.79671376424501	19623064
2007-09-12	9.27643687678063	9.49066853632478	9.01212508903134	9.24026789529914	16118919
2007-09-13	9.65482006766382	9.65482006766382	9.21522783119658	9.29869471153846	14645985
2007-09-14	9.51570860042735	9.72437580128205	9.36268598646724	9.66038452635328	13848825
2007-09-17	9.52127305911681	9.7855848468661	9.46562847222222	9.7855848468661	13577318
2007-09-18	9.21522783119658	9.6436911502849	9.12619649216524	9.56857095797721	19907099
2007-09-19	9.46006401353276	9.61865108618234	9.27643687678063	9.28478356481481	19033887
2007-09-20	9.40163719729345	9.63256223290598	9.38494382122507	9.46006401353276	13596616
2007-09-21	9.4544995548433	9.50736191239316	9.12897872150997	9.40163719729345	15811498
2007-09-24	9.99703427706553	10.0081631944444	9.3209525462963	9.45171732549857	24330316
2007-09-25	9.81618936965812	10.10554122151	9.77167370014245	10.0359854878917	14770547
2007-09-26	9.97199421296297	10.2808216702279	9.69377127849003	9.71602911324787	28547625
2007-09-27	10.1917903311966	10.300297275641	9.93304300213675	9.9664297542735	24267706
2007-09-28	10.5173111645299	10.6063425035613	10.2724749821937	10.2724749821937	35294443
2007-10-08	10.979161235755	11.2518197115385	10.6981560719373	10.9402100249288	27622941
2007-10-09	10.7593651175214	11.1488772257835	10.6898093839031	10.8289208511396	14521710
2007-10-10	10.5228756232194	11.2406907941595	10.4894888710826	10.7593651175214	21037971
2007-10-11	10.803880787037	10.8706542913105	10.3837641559829	10.5089644764957	15702791
2007-10-12	10.3587240918803	10.9123877314815	9.9942520477208	10.8845654380342	18695556
2007-10-15	10.4672310363248	10.7176316773504	10.1611858084046	10.5228756232194	21236449
2007-10-16	11.0654103454416	11.2184329594017	10.4561021189459	10.5506979166667	27901240
2007-10-17	11.0375880519943	11.4298823896011	10.7899696403134	11.0208946759259	20107745
2007-10-18	10.3837641559829	11.1349660790598	10.3781996972934	11.0793214921652	18733211
2007-10-19	10.4700132656695	10.7983163283476	10.2446526887464	10.5228756232194	10040026
2007-10-22	10.4700132656695	10.6898093839031	10.10554122151	10.4115864494302	12744208
2007-10-23	10.8289208511396	10.9123877314815	10.536786769943	10.5506979166667	17013974
2007-10-24	11.0236769052707	11.3909311787749	10.87621875	10.8845654380342	25049771
2007-10-25	10.8372675391738	11.3575444266382	10.7593651175214	11.0459347400285	21924523
2007-10-26	11.7971366631054	11.9501592770655	10.9652500890313	10.9958546118234	34751791
2007-10-29	11.9835460292023	12.6318054665242	11.7999188924501	11.8945146901709	34200252
2007-10-30	11.9418125890313	12.0809240562678	11.6914119480057	11.9835460292023	18812002
2007-10-31	12.7625702457265	12.9712374465812	11.9974571759259	12.1866487713675	30969678
2007-11-01	12.5260807514245	13.0213175747863	12.4732183938746	12.5010406873219	22331877
2007-11-02	12.0503195334758	12.7152723468661	11.913990295584	12.2478578169516	18146154
2007-11-05	11.5689938568376	12.2450755876068	11.4966558938746	11.913990295584	16283298
2007-11-06	11.482744747151	11.7414920762108	11.2518197115385	11.3853667200855	10391831
2007-11-07	11.8027011217949	11.8027011217949	11.2685130876068	11.6218562143875	9763222
2007-11-08	11.2212151887464	11.719234241453	11.1627883725071	11.7053230947293	13417110
2007-11-09	11.1627883725071	11.5272604166667	11.0236769052707	11.1294016203704	10562545
2007-11-12	10.9958546118234	11.2128685007122	10.773276264245	10.948556712963	12881574
2007-11-13	10.5228756232194	11.3297221331909	10.444973201567	11.1906106659544	21374596
2007-11-14	10.7983163283476	10.8845654380342	10.3448129451567	10.8289208511396	19607313
2007-11-15	10.6619870904558	10.9457744836182	10.4700132656695	10.7176316773504	16561797
2007-11-16	10.1333635149573	10.5228756232194	10.063807781339	10.4950533297721	17753002
2007-11-19	9.92469631410257	10.3169906517094	9.85514058048433	10.2168303952991	12969870
2007-11-20	10.2724749821937	10.2724749821937	9.65760229700855	9.80227822293447	16355434
2007-11-21	9.91078516737891	10.342030715812	9.71881134259259	10.2863861289174	22370406
2007-11-22	9.3877260505698	9.98034090099715	9.37659713319088	9.63256223290598	11939746
2007-11-23	9.68542459045584	9.77167370014245	9.35433929843305	9.37659713319088	12601691
2007-11-26	9.48788630698006	9.90243847934473	9.47119293091168	9.84957612179487	13020932
2007-11-27	9.15401878561254	9.54353089387464	9.1317609508547	9.38216159188034	12374205
2007-11-28	8.90918260327635	9.24305012464388	8.74224884259259	9.17349439102564	20926523
2007-11-29	9.70211796652421	9.71602911324787	9.08168082264957	9.1317609508547	30497058
2007-11-30	9.43224172008547	9.69655350783476	9.40998388532763	9.68820681980057	14948658
2007-12-03	10.0498966346154	10.4366265135328	9.68820681980057	9.8523583511396	33351253
2007-12-04	10.0999767628205	10.433844284188	10.0498966346154	10.1890081018519	23081893
2007-12-05	10.3559418625356	10.4115864494302	10.0220743411681	10.0999767628205	16592582
2007-12-06	10.3086439636752	10.5117467058405	10.1750969551282	10.3976753027065	12144228
2007-12-07	10.4672310363248	10.5423512286325	10.3142084223647	10.3142084223647	13334078
2007-12-10	10.2780394408832	10.3392484864672	10.1083234508547	10.1834436431624	30603151
2007-12-11	10.1611858084046	10.5479156873219	9.95808306623931	10.3531596331909	27425217
2007-12-12	9.68264236111111	10.0777189280627	9.56022426994302	10.0777189280627	33681263
2007-12-13	9.60195771011396	9.77167370014245	9.56578872863248	9.63256223290598	19899504
2007-12-14	9.77167370014245	9.78002038817664	9.41276611467237	9.55744204059829	18426529
2007-12-17	9.22079228988604	9.68542459045584	9.21522783119658	9.68542459045584	15084511
2007-12-18	9.33208146367521	9.47953961894587	9.12063203347578	9.17349439102564	12560989
2007-12-20	9.60473993945869	9.69377127849003	9.4544995548433	9.60752216880342	18196821
2007-12-21	9.61865108618234	9.77167370014245	9.4823218482906	9.52127305911681	29041825
2007-12-24	9.98034090099715	10.0220743411681	9.64647337962963	9.6909890491453	23935083
2007-12-25	9.98034090099715	10.1305812856125	9.91078516737891	10.0081631944444	18519447
2007-12-26	9.88296287393163	10.1194523682336	9.83010051638177	9.96086529558405	16491463
2007-12-27	10.2446526887464	10.2947328169516	9.68820681980057	9.91078516737891	36721582
2007-12-28	10.1333635149573	10.3169906517094	10.1333635149573	10.2168303952991	26156728
2008-01-02	9.96086529558405	10.1723147257835	9.86905172720797	10.10554122151	20052473
2008-01-03	9.7855848468661	9.98868758903134	9.55187758190883	9.9664297542735	27564831
2008-01-04	10.0693722400285	10.1611858084046	9.79393153490028	9.79949599358974	19870438
2008-01-07	10.2919505876068	10.4616665776353	9.9664297542735	10.0165098824786	31514015
2008-01-08	10.6313825676638	10.8956943554131	10.3587240918803	10.3615063212251	49992445
2008-01-09	10.8317030804843	10.8539609152422	10.6313825676638	10.6313825676638	19249479
2008-01-10	11.0654103454416	11.2128685007122	10.6925916132479	10.8845654380342	24469958
2008-01-11	11.6580251958689	11.7748788283476	11.0236769052707	11.0459347400285	35843020
2008-01-14	11.482744747151	11.6914119480057	11.3603266559829	11.677500801282	20857080
2008-01-15	11.0876681801994	11.6357673611111	11.0793214921652	11.482744747151	17704050
2008-01-16	10.4672310363248	11.009765758547	10.4421909722222	10.8817832086895	30123006
2008-01-17	10.773276264245	10.8984765847578	10.2223948539886	10.3893286146724	24076153
2008-01-18	10.773276264245	10.9930723824786	10.6007780448718	10.8010985576923	11558553
2008-01-21	9.91078516737891	10.7454539707977	9.79949599358974	10.6619870904558	21187522
2008-01-22	9.35433929843305	10.0220743411681	9.10672088675214	9.62978000356125	26457135
2008-01-23	9.90522070868946	9.94138969017094	9.46562847222222	9.63256223290598	21565431
2008-01-24	9.79671376424501	10.0999767628205	9.46562847222222	10.0999767628205	18302062
2008-01-25	9.99146981837607	10.2641282941595	9.49345076566951	9.69655350783476	17885973
2008-01-28	9.25139681267806	9.85514058048433	9.23748566595442	9.83010051638177	12042490
2008-01-29	9.33208146367521	9.60473993945869	9.12619649216524	9.35433929843305	9887327
2008-01-30	8.83962686965812	9.5490953525641	8.52245272435897	9.52127305911681	19531760
2008-01-31	8.65878196225071	9.04829407051282	8.62539521011396	8.85632024572649	15679243
2008-02-01	9.00656063034188	9.26530795940171	8.57531508190883	8.72833769586894	15547731
2008-02-04	9.9469541488604	9.96921198361823	9.37659713319088	9.37937936253561	24883405
2008-02-05	9.77167370014245	10.0498966346154	9.70211796652421	9.9664297542735	10076306
2008-02-13	9.51570860042735	9.67986013176638	9.41276611467237	9.5490953525641	4539728
2008-02-14	9.68542459045584	9.7855848468661	9.63534446225071	9.64647337962963	4347812
2008-02-15	9.42667726139601	9.6242155448718	9.22079228988604	9.6242155448718	6990423
2008-02-18	9.54631312321937	9.64647337962963	9.4155483440171	9.59082879273504	8387170
2008-02-19	9.76610924145299	9.79393153490028	9.46006401353276	9.61865108618234	11073467
2008-02-20	9.07333413461538	9.7382869480057	9.01490731837607	9.68820681980057	40262356
2008-02-21	8.85075578703704	9.11784980413105	8.65321750356125	9.10393865740741	25883847
2008-02-22	8.3638656517094	8.76450667735043	8.21362526709402	8.74503107193732	22755692
2008-02-25	7.94096679131054	8.46124367877493	7.90201558048433	8.30543883547008	21110563
2008-02-26	8.14406953347578	8.36664788105413	7.94096679131054	8.29430991809117	21754748
2008-02-27	8.51967049501424	8.62817743945869	8.18858520299145	8.18858520299145	18590426
2008-02-28	8.51967049501424	8.65878196225071	8.43620361467237	8.57531508190883	9632576
2008-02-29	8.61704852207977	8.6949509437322	8.43620361467237	8.49184820156695	6860431
2008-03-03	8.57531508190883	8.73111992521367	8.26370539529914	8.54749278846154	34385007
2008-03-04	7.67109054487179	8.59200845797721	7.65717939814815	8.59200845797721	93051716
2008-03-05	7.576494747151	7.82411315883191	7.26766728988604	7.72673513176638	30709062
2008-03-06	7.82411315883191	8.10233609330484	7.55423691239316	7.60431704059829	27566228
2008-03-07	7.65717939814815	8.0133047542735	7.57093028846154	7.68778392094017	14039600
2008-03-10	7.04508894230769	7.57371251780627	6.9894443554131	7.56814805911681	27610749
2008-03-11	6.90319524572649	7.11464467592593	6.7807771545584	6.9226708511396	26149871
2008-03-12	6.599932247151	7.18141818019943	6.56932772435897	7.15081365740741	27762925
2008-03-13	6.64444791666666	6.75295486111111	6.43299848646724	6.48864307336182	25454355
2008-03-14	6.32449154202279	6.62775454059829	6.26050026709402	6.62775454059829	28678661
2008-03-17	6.35509606481481	6.5721099537037	6.20485568019943	6.27997587250712	20630924
2008-03-18	6.40517619301994	6.61384339387464	6.23824243233618	6.35509606481481	25803284
2008-03-19	6.91154193376068	6.96718652065527	6.599932247151	6.65835906339031	32823978
2008-03-20	7.46242334401709	7.57093028846154	6.24102466168091	6.53872320156695	47922708
2008-03-21	7.27601397792023	7.49859232549858	7.15081365740741	7.39286761039886	28001818
2008-03-24	6.76964823717949	7.39286761039886	6.76686600783476	7.31496518874644	17875188
2008-03-25	7.04230671296296	7.13690251068376	6.54706988960114	6.65001237535612	23801815
2008-03-26	7.15637811609687	7.45407665598291	7.04508894230769	7.10073352920228	23280296
2008-03-27	7.04787117165242	7.28436066595441	6.90597747507123	6.99779104344729	21298116
2008-03-28	7.47355226139601	7.60988149928775	6.71956810897436	6.92823530982906	46300692
2008-03-31	7.23984499643874	7.47355226139601	7.10351575854701	7.17028926282051	21667078
2008-04-01	7.15916034544159	7.50415678418803	6.90597747507123	7.18420040954416	30186231
2008-04-02	7.4346010505698	7.72951736111111	7.18420040954416	7.34278748219373	43599162
2008-04-03	7.53476130698006	7.54589022435897	7.11464467592593	7.32331187678062	23375837
2008-04-07	7.74064627849003	7.83802430555555	7.34556971153846	7.45407665598291	25576906
2008-04-08	7.64883271011396	7.76846857193732	7.44016550925926	7.76846857193732	20170024
2008-04-09	7.10908021723647	7.57371251780627	7.08682238247863	7.49302786680912	26314042
2008-04-10	7.19811155626781	7.23984499643874	6.91988862179487	7.10908021723647	18071758
2008-04-11	7.32331187678062	7.42903659188034	7.18698263888889	7.35113417022792	12228299
2008-04-14	6.53037651353276	7.18420040954416	6.53037651353276	7.12855582264957	22241733
2008-04-15	6.51646536680912	6.53315874287749	6.16312224002849	6.48864307336182	16833730
2008-04-16	6.30779816595442	6.58045664173789	6.30501593660969	6.45247409188034	15123700
2008-04-17	5.84038363603989	6.51646536680912	5.73187669159544	6.25215357905983	25121721
2008-04-18	5.75413452635328	5.93776166310541	5.51764503205128	5.73187669159544	15742948
2008-04-21	5.62893420584046	6.29388701923077	5.58441853632479	6.29388701923077	28200987
2008-04-22	5.9461083511396	6.01566408475783	5.37575133547009	5.57050738960114	23957040
2008-04-23	6.34674937678063	6.38291835826211	5.85429478276353	5.90437491096866	24528121
2008-04-24	7.04230671296296	7.04230671296296	6.79468830128205	7.03117779558404	49454643
2008-04-25	7.17028926282051	7.44572996794872	6.91154193376068	7.07291123575499	39189251
2008-04-28	7.14246696937322	7.2259338497151	6.93379976851852	7.02004887820513	20070757
2008-04-29	7.17028926282051	7.26210283119658	7.03952448361823	7.10073352920228	15081118
2008-04-30	7.63492156339031	7.73508181980057	7.18420040954416	7.18420040954416	30875968
2008-05-05	7.63492156339031	7.78237971866097	7.44851219729345	7.68500169159544	23730439
2008-05-06	7.38173869301994	7.55980137108262	7.32609410612536	7.49024563746439	19056215
2008-05-07	6.8753729522792	7.47911672008547	6.87259072293447	7.34835194088319	30220487
2008-05-08	7.05900008903134	7.0645645477208	6.60271447649573	6.76686600783476	17947774
2008-05-09	6.65279460470085	7.14246696937322	6.56654549501424	7.07012900641026	32322191
2008-05-12	6.86424403490029	7.00335550213675	6.37735389957265	6.51646536680912	21832917
2008-05-13	6.66948798076923	6.82529282407407	6.599932247151	6.62775454059829	19155322
2008-05-14	7.15359588675214	7.18141818019943	6.65001237535612	6.65279460470085	22140581
2008-05-15	6.95605760327635	7.31774741809117	6.95605760327635	7.25375614316239	15454360
2008-05-16	7.11464467592593	7.18420040954416	6.95605760327635	6.95605760327635	16571754
2008-05-19	7.18420040954416	7.23149830840456	6.96162206196581	7.04508894230769	13026267
2008-05-20	6.67783466880342	7.28992512464387	6.63053676994302	7.18420040954416	15256881
2008-05-21	6.73904371438746	6.83363951210826	6.46082077991453	6.57489218304843	14083501
2008-05-22	6.53315874287749	6.7807771545584	6.50255422008547	6.65557683404558	14851410
2008-05-23	6.48864307336182	6.65557683404558	6.37178944088319	6.54428766025641	11565388
2008-05-26	6.30501593660969	6.41630511039886	6.12417102920228	6.34953160612536	13153037
2008-05-27	6.35509606481481	6.43299848646724	6.25215357905983	6.3161448539886	5844609
2008-05-28	6.67505243945869	6.73904371438746	6.3439671474359	6.363442752849	12619931
2008-05-29	6.33562045940171	6.65557683404558	6.32449154202279	6.62219008190883	7862650
2008-05-30	6.41352288105413	6.50811867877493	6.32727377136752	6.4107406517094	8133357
2008-06-02	6.59158555911681	6.6472301460114	6.30501593660969	6.41352288105413	14623899
2008-06-03	6.46916746794872	6.65557683404558	6.41352288105413	6.53872320156695	8044111
2008-06-04	6.51368313746439	6.53594097222222	6.23824243233618	6.45525632122507	9670587
2008-06-05	6.40795842236467	6.51646536680912	6.3161448539886	6.41630511039886	7901501
2008-06-06	6.27997587250712	6.46916746794872	6.25215357905983	6.43299848646724	7634001
2008-06-10	5.59276522435897	5.87655261752137	5.59276522435897	5.87655261752137	17527141
2008-06-11	5.2922844551282	5.56494293091168	5.28115553774929	5.47312936253561	18995264
2008-06-13	5.28671999643875	5.34792904202279	5.13926184116809	5.26446216168091	14290813
2008-06-16	5.39800917022792	5.54268509615384	5.20325311609687	5.30619560185185	10627305
2008-06-17	5.2922844551282	5.4814760505698	5.20881757478633	5.36184018874644	11178552
2008-06-18	5.53712063746439	5.59276522435897	5.13926184116809	5.23942209757835	17811935
2008-06-19	5.01406152065527	5.55659624287749	4.9695458511396	5.50651611467236	15358741
2008-06-20	5.23663986823362	5.55659624287749	4.93059464031339	4.9500702457265	19909047
2008-06-23	5.36184018874644	5.48425827991453	5.23663986823362	5.28671999643875	12773789
2008-06-24	5.38966248219373	5.49538719729345	5.15317298789174	5.20881757478633	17355432
2008-06-25	5.48704050925926	5.56494293091168	5.19490642806268	5.29506668447293	33998563
2008-06-26	5.40357362891738	5.59832968304843	5.32288897792023	5.4147025462963	25886924
2008-06-27	4.80261209045584	5.19490642806268	4.80261209045584	5.19490642806268	45600137
2008-06-30	4.77200756766382	4.8749500534188	4.68575845797721	4.68854068732194	18748959
2008-07-01	4.61063826566952	4.81374100783476	4.51604246794872	4.77478979700855	21972982
2008-07-02	4.59672711894587	4.66906508190883	4.53273584401709	4.58281597222222	10492748
2008-07-03	4.66906508190883	4.80539431980057	4.33797978988604	4.54108253205128	16808785
2008-07-04	4.68854068732194	4.76922533831909	4.67741176994302	4.73583858618234	14608876
2008-07-07	5.05857719017094	5.06970610754986	4.71079852207977	4.72192743945869	17193599
2008-07-08	5.00849706196581	5.12256846509972	4.95841693376068	5.08639948361823	12175823
2008-07-09	5.31732451923077	5.44808929843305	5.06692387820513	5.06970610754986	23275615
2008-07-10	5.30619560185185	5.50373388532763	5.16986636396012	5.20881757478633	16263534
2008-07-11	5.20881757478633	5.36184018874644	5.10865731837607	5.30619560185185	9422513
2008-07-14	5.27837330840456	5.33401789529915	5.05301273148148	5.06970610754986	9246602
2008-07-15	4.91668349358974	5.30619560185185	4.89164342948718	5.2922844551282	15070962
2008-07-16	4.62454941239316	4.84712775997151	4.46318011039886	4.84712775997151	15023373
2008-07-17	4.58281597222222	4.77478979700855	4.52995361467237	4.74974973290598	10090353
2008-07-18	4.78870094373219	4.79148317307692	4.54386476139601	4.70801629273504	16424095
2008-07-21	4.92781241096866	4.95563470441595	4.68297622863248	4.71079852207977	12947334
2008-07-22	4.94172355769231	5.03075489672365	4.9027723468661	4.93059464031339	6544650
2008-07-23	4.88886120014245	5.09752840099715	4.8554744480057	5.00015037393162	8631436
2008-07-24	5.18099528133903	5.19768865740741	4.70801629273504	4.95563470441595	20512131
2008-07-25	5.25889770299145	5.35349350071225	5.02797266737892	5.07248833689459	22351323
2008-07-28	5.45921821581197	5.55103178418803	5.30619560185185	5.33123566595442	27212752
2008-07-29	5.30619560185185	5.38966248219373	5.23663986823362	5.32288897792023	10577427
2008-07-30	5.38409802350427	5.45921821581197	5.28393776709402	5.41192031695157	10733509
2008-07-31	5.18099528133903	5.38966248219373	5.18099528133903	5.33680012464387	10316822
2008-08-01	5.4814760505698	5.59832968304843	5.12535069444445	5.17264859330484	14167331
2008-08-04	5.36184018874644	5.54546732549858	5.36184018874644	5.39800917022792	13620809
2008-08-05	5.23663986823362	5.51208057336182	5.21994649216524	5.43139592236467	13761518
2008-08-06	5.19490642806268	5.39800917022792	5.05579496082621	5.29506668447293	10367490
2008-08-07	5.22272872150997	5.28671999643875	5.09752840099715	5.15595521723647	7491428
2008-08-08	4.95841693376068	5.21438203347578	4.94450578703704	5.21438203347578	9303355
2008-08-11	4.76366087962963	5.14760852920228	4.73305635683761	4.95841693376068	9938972
2008-08-12	4.76366087962963	4.84712775997151	4.71079852207977	4.74140304487179	7730797
2008-08-13	4.7608786502849	4.81374100783476	4.59116266025641	4.74696750356125	7040456
2008-08-14	4.7608786502849	4.81930546652422	4.63846055911681	4.6941051460114	3202969
2008-08-15	4.84712775997151	4.92781241096866	4.64958947649573	4.76644310897436	7281591
2008-08-18	4.68854068732194	4.89442565883191	4.68019399928775	4.84990998931624	7740958
2008-08-19	4.74974973290598	4.8749500534188	4.59672711894587	4.6662828525641	4432379
2008-08-20	5.19490642806268	5.25889770299145	4.6941051460114	4.7135807514245	17558719
2008-08-21	5.01684375	5.23385763888889	4.95841693376068	5.23385763888889	8331330
2008-08-22	4.93059464031339	5.0641416488604	4.8276521545584	5.00015037393162	6420982
2008-08-25	4.9973681445869	5.0836172542735	4.84434553062678	4.96676362179487	7999602
2008-08-26	4.96119916310541	5.05579496082621	4.8749500534188	4.92781241096866	8055195
2008-08-27	4.94728801638177	5.05301273148148	4.88329674145299	4.94450578703704	6792051
2008-08-28	4.97789253917379	5.08918171296296	4.91390126424501	4.95563470441595	7265713
2008-08-29	5.01406152065527	5.12256846509972	4.91946572293447	5.01127929131054	15302998
2008-09-01	4.66906508190883	4.98623922720798	4.66906508190883	4.98623922720798	11032846
2008-09-02	4.5995093482906	4.69966960470085	4.54108253205128	4.64958947649573	11106084
2008-09-03	4.45205119301994	4.61063826566952	4.38805991809117	4.59116266025641	8582486
2008-09-04	4.4854379451567	4.53551807336182	4.37971323005698	4.44926896367521	5238821
2008-09-05	4.46874456908832	4.54108253205128	4.30737526709402	4.37971323005698	10625396
2008-09-08	4.31293972578348	4.56890482549858	4.26285959757835	4.56890482549858	6171235
2008-09-09	4.24338399216524	4.37136654202279	4.2294728454416	4.34632647792023	7871995
2008-09-10	4.17939271723647	4.31293972578348	4.09314360754986	4.22390838675214	6220651
2008-09-11	3.87334748931624	4.17661048789174	3.85108965455841	4.17661048789174	9413327
2008-09-12	3.84274296652422	3.95124991096866	3.81213844373219	3.87334748931624	4854249
2008-09-16	3.39758627136752	3.76205831552707	3.39758627136752	3.76205831552707	27883392
2008-09-17	3.03033199786325	3.32803053774929	2.99694524572649	3.26960372150997	29809021
2008-09-18	3.09432327279202	3.28351486823362	2.84392263176638	2.8745271545584	29019241
2008-09-19	3.46435977564103	3.46435977564103	3.42819079415954	3.46435977564103	11136764
2008-09-22	3.87056525997151	3.87056525997151	3.58956009615385	3.86778303062678	60346739
2008-09-23	3.59234232549858	3.80379175569801	3.56173780270655	3.67859143518519	20571693
2008-09-24	3.48383538105413	3.52278659188034	3.39202181267806	3.48383538105413	19568613
2008-09-25	3.65355137108262	3.75371162749288	3.47827092236467	3.50609321581197	24620104
2008-09-26	3.56452003205128	3.73145379273504	3.39480404202279	3.70919595797721	25302827
2008-10-06	3.26125703347578	3.50609321581197	3.14718563034188	3.50609321581197	29675771
2008-10-07	3.28629709757835	3.38367512464387	3.06650097934473	3.10823441951567	19088611
2008-10-08	3.06650097934473	3.1583145477208	2.94130065883191	3.09432327279202	30044517
2008-10-09	3.00807416310541	3.18613684116809	2.97190518162393	3.1777901531339	15857376
2008-10-10	2.74654460470085	2.88287384259259	2.72706899928775	2.84392263176638	15885640
2008-10-13	3.08319435541311	3.08319435541311	2.7604557514245	2.78827804487179	51112279
2008-10-14	3.06093652065527	3.31133716168091	3.04702537393162	3.25012811609687	50409608
2008-10-16	2.84114040242165	2.9496473468661	2.78271358618234	2.88565607193732	25859654
2008-10-17	2.98303409900285	2.98303409900285	2.83835817307692	2.88009161324786	18829992
2008-10-20	3.17222569444444	3.23621696937322	2.89956721866097	2.9496473468661	15201682
2008-10-21	3.08875881410256	3.25012811609687	3.08875881410256	3.1777901531339	15051568
2008-10-22	3.05258983262108	3.1777901531339	3.01085639245014	3.01920308048433	13697794
2008-10-23	2.88287384259259	2.95521180555556	2.70202893518519	2.95521180555556	35768549
2008-10-24	2.7409801460114	2.91626059472934	2.69090001780627	2.88843830128205	28775096
2008-10-27	2.40711262464387	2.64916657763533	2.40711262464387	2.6463843482906	30655300
2008-10-28	2.59073976139601	2.66307772435897	2.29025899216524	2.31529905626781	41883821
2008-10-29	2.45997498219373	2.63525543091168	2.45441052350427	2.63525543091168	28227917
2008-10-30	2.54065963319088	2.61021536680912	2.42658823005698	2.45441052350427	34201994
2008-10-31	2.43076157407407	2.57182060185185	2.40544328703704	2.55011921296296	24405445
2008-11-03	2.44161226851852	2.53203472222222	2.35480671296296	2.3873587962963	20198125
2008-11-04	2.42352777777778	2.46331365740741	2.29693634259259	2.40906018518519	19527612
2008-11-05	2.60437268518519	2.71287962962963	2.44884606481481	2.45969675925926	47262233
2008-11-06	2.45246296296296	2.53565162037037	2.42714467592593	2.47778125	23361786
2008-11-07	2.5826712962963	2.65500925925926	2.3728912037037	2.39097569444444	31894458
2008-11-10	2.89372453703704	2.89734143518519	2.65862615740741	2.69117824074074	56584866
2008-11-11	2.84670486111111	2.97691319444444	2.80330208333333	2.85032175925926	51500034
2008-11-12	2.94074421296296	2.98053009259259	2.7779837962963	2.79245138888889	36471064
2008-11-13	3.12158912037037	3.18307638888889	2.83585416666667	2.8756400462963	64883598
2008-11-14	3.24456365740741	3.29158333333333	3.07818634259259	3.16499189814815	68860604
2008-11-17	3.38562268518519	3.40009027777778	3.17222569444444	3.23732986111111	65175407
2008-11-18	3.0564849537037	3.50859722222222	2.99861458333333	3.33860300925926	72660512
2008-11-19	3.36753819444445	3.39285648148148	3.03116666666667	3.06010185185185	54566250
2008-11-20	3.20839467592593	3.35307060185185	3.161375	3.2662650462963	61133937
2008-11-21	3.10350462962963	3.2662650462963	2.9660625	3.0564849537037	54656807
2008-11-24	2.94074421296296	3.11073842592593	2.92265972222222	3.10712152777778	45110666
2008-11-25	2.89734143518519	3.05286805555556	2.83223726851852	3.02754976851852	37093709
2008-11-26	2.83947106481481	2.90819212962963	2.76713310185185	2.90457523148148	31366296
2008-11-27	2.82500347222222	3.08542013888889	2.82138657407407	3.0564849537037	83405616
2008-11-28	2.65500925925926	2.7779837962963	2.58628819444445	2.7779837962963	49514179
2008-12-01	2.70202893518519	2.71649652777778	2.61160648148148	2.61160648148148	31861070
2008-12-02	2.70202893518519	2.72373032407407	2.5826712962963	2.61884027777778	34089364
2008-12-03	2.89372453703704	2.89734143518519	2.74543171296296	2.75628240740741	86389888
2008-12-04	3.02031597222222	3.18307638888889	2.98414699074074	3.01308217592593	117416871
2008-12-05	3.13243981481482	3.15052430555555	3.00223148148148	3.00584837962963	67229777
2008-12-08	3.32775231481481	3.37115509259259	3.20477777777778	3.23732986111111	87382862
2008-12-09	3.17222569444444	3.38562268518519	3.16499189814815	3.38200578703704	69102995
2008-12-10	3.46881134259259	3.50136342592593	3.17945949074074	3.17945949074074	101726067
2008-12-11	3.31690162037037	3.49412962962963	3.30966782407407	3.38923958333333	67510034
2008-12-12	3.10350462962963	3.28796643518519	3.05286805555556	3.25541435185185	49130134
2008-12-15	3.09988773148148	3.23371296296296	2.94797800925926	3.20477777777778	55898860
2008-12-16	3.07456944444444	3.09627083333333	2.92989351851852	3.04201736111111	40333587
2008-12-17	3.02754976851852	3.12158912037037	2.98414699074074	3.09627083333333	51809248
2008-12-18	3.23732986111111	3.25541435185185	2.97691319444444	3.02754976851852	62334395
2008-12-19	3.21201157407407	3.32051851851852	3.17584259259259	3.19754398148148	55108831
2008-12-22	3.12882291666667	3.23009606481481	3.08180324074074	3.20116087962963	34056207
2008-12-23	3.08542013888889	3.24094675925926	3.01308217592593	3.13243981481482	50569218
2008-12-24	3.06371875	3.1541412037037	2.99138078703704	3.00223148148148	34603493
2008-12-25	2.94074421296296	3.11797222222222	2.90095833333333	3.11797222222222	30683966
2008-12-26	2.91904282407407	2.98053009259259	2.89372453703704	2.92989351851852	26588139
2008-12-29	2.82862037037037	2.88287384259259	2.73096412037037	2.8756400462963	27793062
2008-12-30	2.83947106481481	2.88649074074074	2.78160069444444	2.82500347222222	32719301
2008-12-31	2.82500347222222	2.8756400462963	2.76713310185185	2.85755555555556	23226225
2009-01-05	2.91542592592593	2.92627662037037	2.84308796296296	2.86478935185185	34082718
2009-01-06	3.12882291666667	3.17584259259259	2.92265972222222	2.94797800925926	63533035
2009-01-07	3.01669907407407	3.16499189814815	3.01669907407407	3.09265393518519	61196035
2009-01-08	2.8756400462963	2.93351041666667	2.83947106481481	2.92989351851852	39257246
2009-01-09	2.9660625	2.99499768518519	2.8756400462963	2.8756400462963	60445727
2009-01-12	2.96967939814815	3.04925115740741	2.90095833333333	2.94074421296296	41548041
2009-01-13	2.82862037037037	2.88649074074074	2.61522337962963	2.61522337962963	173070799
2009-01-14	3.09265393518519	3.11073842592593	2.76713310185185	2.76713310185185	76532472
2009-01-15	3.12882291666667	3.23732986111111	3.00946527777778	3.02393287037037	89501439
2009-01-16	3.24456365740741	3.36030439814815	3.14329050925926	3.14329050925926	66437035
2009-01-19	3.42179166666667	3.50859722222222	3.25541435185185	3.25541435185185	93633487
2009-01-20	3.51221412037037	3.52668171296296	3.38923958333333	3.40732407407407	47297473
2009-01-21	3.66774074074074	3.81603356481481	3.38200578703704	3.43625925925926	82445596
2009-01-22	3.66774074074074	3.74369560185185	3.52668171296296	3.67135763888889	46940962
2009-01-23	3.61348726851852	3.71837731481481	3.59178587962963	3.59178587962963	34571254
2009-02-02	3.62072106481482	3.7400787037037	3.56646759259259	3.6568900462963	32974937
2009-02-03	3.72561111111111	3.76539699074074	3.59901967592593	3.62072106481482	36864028
2009-02-04	4.11985300925926	4.15963888888889	3.75092939814815	3.75092939814815	54095165
2009-02-05	4.0330474537037	4.17772337962963	3.97156018518519	4.1307037037037	37342847
2009-02-06	4.17410648148148	4.26452893518518	4.04028125	4.04028125	32469802
2009-02-09	4.37665277777778	4.48154282407407	4.26814583333333	4.26814583333333	47428273
2009-02-10	4.34410069444445	4.39473726851852	4.17048958333333	4.3260162037037	53370564
2009-02-11	4.39473726851852	4.56473148148148	4.12708680555556	4.27899652777778	82219311
2009-02-12	4.20665856481481	4.42005555555556	4.06559953703704	4.42005555555556	55995692
2009-02-13	4.3260162037037	4.35856828703704	4.10176851851852	4.16325578703704	51296009
2009-02-16	4.59366666666667	4.61175115740741	4.35133449074074	4.35133449074074	69180971
2009-02-17	4.59728356481481	4.85408333333333	4.4236724537037	4.59366666666667	72735160
2009-02-18	4.46707523148148	4.78897916666667	4.35856828703704	4.5357962962963	97747550
2009-02-19	4.26814583333333	4.53941319444444	4.10538541666667	4.46707523148148	63473557
2009-02-20	4.33325	4.35133449074074	4.14155439814815	4.21389236111111	40842994
2009-02-23	4.82514814814815	4.82514814814815	4.25367824074074	4.27899652777778	69336562
2009-02-25	4.88301851851852	5.18322106481481	4.40197106481481	4.61175115740741	143462607
2009-02-26	4.39473726851852	4.9119537037037	4.33686689814815	4.75281018518518	87113777
2009-03-02	4.46707523148148	4.53941319444444	4.09815162037037	4.17772337962963	59278180
2009-03-03	4.28984722222222	4.45260763888889	4.23197685185185	4.25367824074074	29564234
2009-03-04	4.76727777777778	4.77812847222222	4.31516550925926	4.31516550925926	67897933
2009-03-05	4.88301851851852	5.10003240740741	4.7166412037037	4.80344675925926	91314310
2009-03-06	4.82514814814815	4.95535648148148	4.72749189814815	4.73834259259259	45439594
2009-03-09	4.71302430555556	5.07471412037037	4.65153703703704	4.93365509259259	56138189
2009-03-10	4.77451157407407	4.77451157407407	4.58281597222222	4.62983564814815	25137583
2009-03-11	4.70579050925926	5.00599305555555	4.70217361111111	4.97344097222222	45120026
2009-03-12	4.87216782407407	4.89386921296296	4.6189849537037	4.70579050925926	34793355
2009-03-13	4.76366087962963	4.92280439814815	4.75281018518518	4.89386921296296	26856230
2009-03-16	4.9191875	4.96982407407407	4.64068634259259	4.72025810185185	41565143
2009-03-17	5.15066898148148	5.20853935185185	4.84323263888889	4.88301851851852	66010095
2009-03-18	5.08556481481482	5.2193900462963	5.06748032407407	5.19045486111111	53778471
2009-03-19	5.1145	5.17598726851852	4.93003819444445	5.09279861111111	57050540
2009-03-20	4.94812268518518	5.07109722222222	4.8287650462963	5.0096099537037	63737660
2009-03-23	5.04577893518518	5.06024652777778	4.86855092592593	4.86855092592593	71122744
2009-03-24	5.07109722222222	5.26279282407407	5.06386342592593	5.13620138888889	84296483
2009-03-25	5.11811689814815	5.20853935185185	5.01322685185185	5.02769444444445	48814831
2009-03-26	5.37853356481481	5.40746875	5.08194791666667	5.13620138888889	71702777
2009-03-27	5.32428009259259	5.42555324074074	5.27364351851852	5.37129976851852	38755129
2009-03-30	5.2049224537037	5.36406597222222	5.12896759259259	5.33513078703704	40576759
2009-03-31	5.16875347222222	5.22300694444444	5.0240775462963	5.08194791666667	32344849
2009-04-01	5.26279282407407	5.37129976851852	5.18322106481481	5.19045486111111	40323901
2009-04-02	5.44725462962963	5.4978912037037	5.27364351851852	5.27364351851852	56585358
2009-04-03	5.46172222222222	5.63895023148148	5.40746875	5.48342361111111	60770480
2009-04-07	5.42555324074074	5.62448263888889	5.36044907407407	5.46172222222222	32679459
2009-04-08	5.21215625	5.51597569444444	5.19407175925926	5.38938425925926	44819963
2009-04-09	5.3170462962963	5.33513078703704	5.20130555555555	5.21215625	30797570
2009-04-10	5.41108564814815	5.41831944444444	5.28087731481482	5.37129976851852	32964042
2009-04-13	5.45810532407407	5.4978912037037	5.37129976851852	5.43640393518518	33386721
2009-04-14	5.42917013888889	5.46533912037037	5.36406597222222	5.4147025462963	26497675
2009-04-15	5.29896180555555	5.41831944444444	5.19045486111111	5.4002349537037	42437779
2009-04-16	5.3170462962963	5.35321527777778	5.16875347222222	5.29172800925926	40431865
2009-04-17	5.14705208333333	5.27002662037037	5.13620138888889	5.27002662037037	41670276
2009-04-20	5.24109143518519	5.25555902777778	5.09279861111111	5.13620138888889	32062704
2009-04-21	5.1145	5.18683796296296	4.99152546296296	5.17237037037037	35331689
2009-04-22	4.9264212962963	5.21577314814815	4.90110300925926	5.12896759259259	35164920
2009-04-23	4.90471990740741	4.98067476851852	4.8287650462963	4.9191875	22036413
2009-04-24	4.94812268518518	5.17598726851852	4.9264212962963	4.98429166666667	34010264
2009-04-27	4.88301851851852	4.99152546296296	4.83238194444445	4.88301851851852	20666502
2009-04-28	5.04577893518518	5.08918171296296	4.89386921296296	4.89386921296296	37591698
2009-04-29	5.37491666666667	5.52682638888889	5.04216203703704	5.04939583333333	58709206
2009-04-30	5.30619560185185	5.4147025462963	5.23024074074074	5.33513078703704	34225411
2009-05-04	5.46533912037037	5.51959259259259	5.28449421296296	5.34598148148148	38377789
2009-05-05	5.47257291666667	5.62448263888889	5.44363773148148	5.50150810185185	31403166
2009-05-06	5.64256712962963	5.67873611111111	5.4147025462963	5.44725462962963	47128948
2009-05-07	5.89575	5.93553587962963	5.63171643518518	5.63895023148148	61011413
2009-05-08	5.97893865740741	6.01510763888889	5.76192476851852	5.79809375	57994600
2009-05-11	5.78724305555555	6.34786226851852	5.77277546296296	5.9861724537037	67328848
2009-05-12	5.87766550925926	5.91383449074074	5.71128819444444	5.76192476851852	20702638
2009-05-13	5.85596412037037	5.9861724537037	5.7908599537037	5.91021759259259	23391167
2009-05-14	5.70405439814815	5.84149652777778	5.64256712962963	5.83787962962963	31501791
2009-05-15	5.73298958333333	5.78724305555555	5.66426851851852	5.76192476851852	14635163
2009-05-19	5.87404861111111	5.97893865740741	5.84873032407407	5.84873032407407	29211543
2009-05-20	5.76915856481482	5.9029837962963	5.75469097222222	5.88489930555556	14042095
2009-05-21	5.53406018518518	5.77639236111111	5.50874189814815	5.75107407407407	25424045
2009-05-22	5.58831365740741	5.65341782407407	5.43640393518518	5.50874189814815	23404076
2009-05-25	5.61363194444445	5.71852199074074	5.40746875	5.4978912037037	29555529
2009-05-26	5.58469675925926	5.67873611111111	5.52320949074074	5.62809953703704	17470400
2009-05-27	5.85596412037037	5.85958101851852	5.64618402777778	5.64618402777778	34811571
2009-06-01	6.02234143518518	6.09467939814815	5.89936689814815	5.94638657407407	30023553
2009-06-02	6.08744560185185	6.15616666666667	6.02957523148148	6.07659490740741	43295687
2009-06-03	6.62274652777778	6.65529861111111	6.08744560185185	6.08744560185185	64689721
2009-06-04	6.77465625	6.95550115740741	6.52870717592593	6.56487615740741	61845944
2009-06-05	6.63721412037037	6.85422800925926	6.58296064814815	6.72763657407407	34852859
2009-06-15	7.36059375	7.36059375	6.99890393518518	7.36059375	189638193
2009-06-16	7.57399074074074	7.66441319444444	7.14357986111111	7.17974884259259	149976941
2009-06-17	7.43293171296296	7.54143865740741	7.25208680555555	7.50888657407407	65222443
2009-06-18	7.33165856481481	7.57760763888889	7.2701712962963	7.37867824074074	67096688
2009-06-19	7.38591203703704	7.50526967592593	7.22676851851852	7.30634027777778	57987412
2009-06-22	7.39314583333333	7.51250347222222	7.21591782407407	7.39676273148148	66308628
2009-06-23	7.39676273148148	7.59207523148148	7.18698263888889	7.25208680555555	62469766
2009-06-24	7.15081365740741	7.32080787037037	7.03145601851852	7.31719097222222	65715743
2009-06-25	7.13634606481481	7.27740509259259	7.08932638888889	7.14357986111111	38351564
2009-06-26	7.21591782407407	7.25208680555555	7.12911226851852	7.17613194444444	34117350
2009-06-30	7.29548958333333	7.43293171296296	7.21953472222222	7.36059375	41201295
2009-07-01	7.81270601851852	7.86334259259259	7.20145023148148	7.28825578703704	79857941
2009-07-02	7.82717361111111	7.95738194444444	7.72228356481481	7.79462152777778	48942898
2009-07-03	7.9392974537037	7.97908333333333	7.68973148148148	7.70781597222222	37641353
2009-07-06	8.04057060185185	8.27566898148148	7.87057638888889	7.94291435185185	35197421
2009-07-07	7.6463287037037	8.00440162037037	7.57760763888889	8.00440162037037	51727656
2009-07-08	7.57037384259259	7.66079629629629	7.38229513888889	7.50526967592593	37557134
2009-07-09	7.59930902777778	7.63909490740741	7.41846412037037	7.56675694444445	31959323
2009-07-10	7.64271180555555	7.74760185185185	7.54143865740741	7.60654282407407	29477415
2009-07-13	7.40761342592592	7.59569212962963	7.40761342592592	7.59569212962963	27927602
2009-07-14	7.66803009259259	7.69334837962963	7.4510162037037	7.4510162037037	28946589
2009-07-15	7.71504976851852	7.83802430555555	7.63909490740741	7.68973148148148	28088231
2009-07-16	7.92482986111111	8.03333680555555	7.69696527777778	7.81632291666667	54587243
2009-07-17	7.89227777777778	7.99355092592593	7.72228356481481	7.92482986111111	28419373
2009-07-20	7.96823263888889	7.96823263888889	7.70419907407407	7.89227777777778	37751940
2009-07-21	7.70419907407407	8.08035648148148	7.70058217592593	7.91036226851852	46959997
2009-07-22	7.75121875	7.81270601851852	7.61377662037037	7.67164699074074	41701272
2009-07-23	7.78015393518518	7.91759606481481	7.55952314814815	7.74036805555555	54413366
2009-07-24	7.61377662037037	7.86334259259259	7.54143865740741	7.8416412037037	44827899
2009-07-27	7.7584525462963	7.91759606481481	7.64994560185185	7.65717939814815	38186260
2009-07-28	7.7584525462963	8.04057060185185	7.64994560185185	7.78738773148148	60328018
2009-07-29	8.01163541666667	8.51800115740741	7.63909490740741	7.83079050925926	136505866
2009-07-30	8.87245717592593	8.87245717592593	8.21418171296296	8.21418171296296	187171760
2009-08-03	8.75309953703704	8.76033333333333	8.41311111111111	8.75309953703704	99498401
2009-08-04	8.46013078703704	8.69161226851852	8.28290277777778	8.66991087962963	68754450
2009-08-05	8.50353356481481	8.71693055555555	8.33715625	8.39502662037037	46640660
2009-08-06	8.08035648148148	8.35524074074074	7.92121296296296	8.34800694444445	48538247
2009-08-07	7.91397916666667	8.28290277777778	7.88504398148148	8.08759027777778	32396098
2009-08-10	7.70781597222222	8.11652546296296	7.54505555555555	8.04057060185185	46019260
2009-08-11	7.75121875	7.83440740740741	7.54143865740741	7.74036805555555	24518033
2009-08-12	7.49441898148148	7.88866087962963	7.41846412037037	7.71143287037037	36468911
2009-08-13	7.81993981481481	7.83802430555555	7.39314583333333	7.47995138888889	38602862
2009-08-14	7.61377662037037	7.87781018518518	7.46910069444444	7.7584525462963	30672083
2009-08-17	7.0748587962963	7.7584525462963	7.06400810185185	7.4654837962963	44587449
2009-08-18	7.1580474537037	7.23400231481481	6.96635185185185	7.08932638888889	28147160
2009-08-19	6.91933217592593	7.33889236111111	6.79997453703704	7.20868402777778	28151337
2009-08-20	7.20145023148148	7.20506712962963	6.82167592592593	6.93018287037037	34439381
2009-08-21	7.38591203703704	7.54143865740741	7.19783333333333	7.22315162037037	47364078
2009-08-24	7.33165856481481	7.50526967592593	7.2701712962963	7.43654861111111	29007610
2009-08-25	6.76018865740741	7.32080787037037	6.53955787037037	7.32080787037037	55033673
2009-08-26	6.86146180555555	6.95550115740741	6.45636921296296	6.63721412037037	36389326
2009-08-27	6.68785069444444	6.95188425925926	6.6697662037037	6.74572106481481	29075156
2009-08-28	6.33339467592593	6.74933796296296	6.30445949074074	6.677	37559911
2009-08-31	5.98255555555555	6.26829050925926	5.92830208333333	6.25382291666667	36035294
2009-09-01	6.27552430555555	6.37318055555555	5.98255555555555	5.98255555555555	36158872
2009-09-02	6.57934375	6.63721412037037	6.09467939814815	6.15978356481481	41775683
2009-09-03	6.8723125	6.95188425925926	6.51062268518518	6.59381134259259	39437652
2009-09-04	6.90124768518518	7.05677430555555	6.84699421296296	6.92294907407407	28867506
2009-09-07	6.93018287037037	7.06400810185185	6.85422800925926	6.94465046296296	27020890
2009-09-08	6.98443634259259	6.99890393518518	6.81082523148148	6.8723125	33553812
2009-09-09	6.98443634259259	7.07124189814815	6.81805902777778	7.01337152777778	20878620
2009-09-10	6.89039699074074	6.99528703703703	6.83614351851852	6.93741666666666	23354756
2009-09-11	7.28825578703704	7.3533599537037	6.82890972222222	6.82890972222222	45181631
2009-09-14	7.3533599537037	7.42208101851852	7.19421643518518	7.28825578703704	29325694
2009-09-15	7.32080787037037	7.43293171296296	7.21591782407407	7.36059375	20738598
2009-09-16	7.10017708333333	7.27740509259259	6.98443634259259	7.22315162037037	28273293
2009-09-17	7.17613194444444	7.24123611111111	7.12549537037037	7.12549537037037	22003636
2009-09-18	6.81805902777778	7.22676851851852	6.67338310185185	7.21953472222222	54450576
2009-09-21	6.79274074074074	6.81805902777778	6.44913541666667	6.72401967592592	41342071
2009-09-22	6.53594097222222	6.79274074074074	6.51423958333333	6.67338310185185	35398341
2009-09-23	6.45998611111111	6.63359722222222	6.39488194444444	6.53955787037037	24889864
2009-09-24	6.75295486111111	6.90848148148148	6.39488194444444	6.45998611111111	48166062
2009-09-25	6.69146759259259	6.73848726851852	6.52147337962963	6.63721412037037	21187026
2009-09-28	6.43466782407407	6.75295486111111	6.39488194444444	6.69146759259259	14585959
2009-09-29	6.54317476851852	6.61189583333333	6.38403125	6.45636921296296	18796145
2009-09-30	6.64083101851852	6.71678587962963	6.57934375	6.59381134259259	18252247
2009-10-09	7.01698842592593	7.07124189814815	6.71678587962963	6.81805902777778	25746333
2009-10-12	6.99528703703703	7.17613194444444	6.9627349537037	7.07124189814815	24098295
2009-10-13	7.04230671296296	7.07124189814815	6.90848148148148	6.94465046296296	12696189
2009-10-14	7.08209259259259	7.2557037037037	7.00975462962963	7.05315740740741	29070153
2009-10-15	7.15081365740741	7.31357407407407	7.08570949074074	7.16166435185185	24515710
2009-10-16	7.11102777777778	7.24123611111111	6.94465046296296	7.1580474537037	19551606
2009-10-19	7.37867824074074	7.38591203703704	6.99890393518518	7.12187847222222	34841307
2009-10-20	7.50165277777778	7.54143865740741	7.36421064814815	7.43293171296296	29899315
2009-10-21	7.58484143518518	7.7439849537037	7.44739930555555	7.50165277777778	28999854
2009-10-22	7.44378240740741	7.61739351851852	7.43654861111111	7.54143865740741	22351324
2009-10-23	7.6535625	7.7439849537037	7.47271759259259	7.50165277777778	24940865
2009-10-26	7.6535625	7.76206944444444	7.56675694444445	7.71504976851852	16238630
2009-10-27	7.36059375	7.60654282407407	7.31719097222222	7.60654282407407	22412900
2009-10-28	7.31719097222222	7.39676273148148	7.15443055555555	7.33165856481481	16509432
2009-10-29	7.43654861111111	7.58122453703704	7.17974884259259	7.21591782407407	37312698
2009-10-30	7.53420486111111	7.70781597222222	7.44378240740741	7.64994560185185	26040539
2009-11-02	8.34800694444445	8.34800694444445	7.28825578703704	7.32442476851852	76286214
2009-11-03	8.42396180555555	8.53246875	8.24311689814815	8.26481828703704	53902663
2009-11-04	8.59033912037037	8.86160648148148	8.33715625	8.33715625	49913087
2009-11-05	8.46374768518518	8.61204050925926	8.39140972222222	8.58310532407407	28931192
2009-11-06	8.48183217592593	8.69522916666667	8.37694212962963	8.58672222222222	30297501
2009-11-09	8.39502662037037	8.51800115740741	8.18524652777778	8.41311111111111	32796651
2009-11-10	8.7350150462963	8.81096990740741	8.44566319444444	8.45289699074074	50208683
2009-11-11	8.65906018518518	8.70969675925926	8.55417013888889	8.630125	19209211
2009-11-12	8.50353356481481	8.77118402777778	8.46736458333333	8.66629398148148	21303875
2009-11-13	8.59033912037037	8.59033912037037	8.37332523148148	8.49991666666667	22648046
2009-11-16	8.88692476851852	8.92671064814815	8.60118981481481	8.64820949074074	33957536
2009-11-17	8.8182037037037	9.07138657407407	8.66629398148148	8.90139236111111	33975694
2009-11-18	8.73863194444444	8.87969097222222	8.67714467592593	8.82905439814815	18193950
2009-11-19	8.78926851851852	8.87969097222222	8.66267708333333	8.78926851851852	19773121
2009-11-20	8.66629398148148	8.79288541666667	8.61927430555556	8.71693055555555	26628396
2009-11-23	8.64459259259259	8.70969675925926	8.55417013888889	8.66991087962963	25265701
2009-11-24	8.49991666666667	8.86884027777778	8.44928009259259	8.71693055555555	37223596
2009-11-25	8.51076736111111	8.61927430555556	8.21056481481482	8.50715046296296	30976531
2009-11-26	7.98631712962963	8.51438425925926	7.90312847222222	8.51076736111111	42368550
2009-11-27	7.8416412037037	8.04780439814815	7.75483564814815	7.88504398148148	38794847
2009-11-30	8.17801273148148	8.20333101851852	7.91397916666667	7.94653125	28186240
2009-12-01	8.15269444444444	8.15631134259259	7.83079050925926	8.13822685185185	53385346
2009-12-02	8.22141550925926	8.35162384259259	8.17801273148148	8.18162962962963	34110019
2009-12-03	8.06588888888889	8.21779861111111	7.97546643518518	8.15631134259259	33920936
2009-12-04	8.55417013888889	8.57225462962963	7.92844675925926	8.06588888888889	79096047
2009-12-07	8.57587152777778	8.73139814814815	8.40949421296296	8.47098148148148	42171046
2009-12-08	8.36247453703704	8.60118981481481	8.30822106481481	8.60118981481481	31247399
2009-12-09	8.31907175925926	8.38055902777778	8.22864930555555	8.33715625	20284418
2009-12-10	8.40587731481481	8.51800115740741	8.30098726851852	8.37332523148148	19128298
2009-12-11	8.4420462962963	8.53608564814815	8.34077314814815	8.40587731481481	17443680
2009-12-14	8.62650810185185	8.7350150462963	8.08035648148148	8.35885763888889	40029297
2009-12-15	8.47459837962963	8.69884606481481	8.44928009259259	8.53608564814815	24853355
2009-12-16	8.39140972222222	8.60842361111111	8.36247453703704	8.40949421296296	16009055
2009-12-17	8.26843518518518	8.51800115740741	8.22864930555555	8.40949421296296	18139668
2009-12-18	8.05865509259259	8.28651967592593	8.05503819444445	8.18886342592593	19786271
2009-12-21	7.92482986111111	8.1346099537037	7.72228356481481	8.02971990740741	17264906
2009-12-22	7.62101041666666	7.96823263888889	7.59569212962963	7.95014814814815	14731918
2009-12-23	7.55952314814815	7.7439849537037	7.46186689814815	7.63547800925926	21340199
2009-12-24	7.82355671296296	7.83440740740741	7.52697106481482	7.59569212962963	29402860
2009-12-29	7.93568055555555	8.01525231481481	7.72228356481481	7.86695949074074	24343903
2009-12-30	8.22503240740741	8.27566898148148	7.87419328703704	7.93568055555555	36333042
2009-12-31	8.21779861111111	8.33353935185185	8.11652546296296	8.22141550925926	21476184
2010-01-04	7.97908333333333	8.29375347222222	7.96823263888889	8.27205208333333	24192276
2010-01-05	7.83079050925926	8.04780439814815	7.63186111111111	7.99355092592593	55649982
2010-01-06	7.68611458333333	7.81270601851852	7.62101041666666	7.81270601851852	41214313
2010-01-07	7.59569212962963	7.74036805555555	7.50526967592593	7.68611458333333	35533685
2010-01-08	7.57760763888889	7.63186111111111	7.48718518518518	7.54143865740741	28854306
2010-01-11	7.57760763888889	7.96823263888889	7.46186689814815	7.90312847222222	44284602
2010-01-12	7.52335416666666	7.59569212962963	7.28825578703704	7.56675694444445	59179591
2010-01-13	6.98443634259259	7.32442476851852	6.92656597222222	7.31357407407407	93503947
2010-01-14	6.98805324074074	7.05677430555555	6.85422800925926	6.99890393518518	52119474
2010-01-15	7.15443055555555	7.23400231481481	6.8723125	7.00613773148148	53950846
2010-01-18	7.16889814814815	7.27378819444445	7.0748587962963	7.15443055555555	34912652
2010-01-19	7.44378240740741	7.48356828703704	7.20145023148148	7.20868402777778	65071514
2010-01-20	7.13634606481481	7.57760763888889	7.10741087962963	7.44016550925926	49083567
2010-01-21	7.60654282407407	7.64994560185185	7.13634606481481	7.20868402777778	63230130
2010-01-22	7.75121875	7.88504398148148	7.31719097222222	7.51973726851852	88253896
2010-01-25	7.42931481481481	7.7584525462963	7.39676273148148	7.57760763888889	35605864
2010-01-26	7.37867824074074	7.57399074074074	7.21591782407407	7.42931481481481	34532556
2010-01-27	7.32804166666666	7.57760763888889	7.25208680555555	7.50165277777778	40103476
2010-01-28	7.2701712962963	7.37867824074074	7.03868981481481	7.28825578703704	26213249
2010-01-29	7.25208680555555	7.48718518518518	7.11464467592593	7.21230092592593	24068821
2010-02-01	7.08570949074074	7.27740509259259	6.99890393518518	7.2557037037037	28317991
2010-02-02	7.13272916666667	7.34612615740741	7.09294328703704	7.09294328703704	28673360
2010-02-03	7.57037384259259	7.57037384259259	7.08570949074074	7.19059953703704	54900574
2010-02-04	7.43293171296296	7.52335416666666	7.36421064814815	7.47995138888889	30334603
2010-02-05	7.36059375	7.47633449074074	7.14719675925926	7.22315162037037	27617400
2010-02-08	7.20145023148148	7.38952893518518	7.16166435185185	7.31719097222222	20642307
2010-02-09	7.36059375	7.41484722222222	7.19059953703704	7.21591782407407	24817026
2010-02-10	7.46186689814815	7.49803587962963	7.36782754629629	7.43293171296296	25383964
2010-02-11	7.40037962962963	7.48718518518518	7.38952893518518	7.43654861111111	13910229
2010-02-12	7.52335416666666	7.57760763888889	7.42208101851852	7.42208101851852	18838563
2010-02-22	7.39676273148148	7.52335416666666	7.38952893518518	7.47271759259259	16577759
2010-02-23	7.19783333333333	7.37867824074074	7.14357986111111	7.37144444444445	23778128
2010-02-24	7.2557037037037	7.28463888888889	7.07847569444444	7.14719675925926	23148645
2010-02-25	7.41484722222222	7.50888657407407	7.21953472222222	7.24123611111111	34787898
2010-02-26	7.52335416666666	7.58484143518518	7.3533599537037	7.36421064814815	45021730
2010-03-02	7.76206944444444	8.06950578703704	7.68249768518518	7.68249768518518	68464727
2010-03-03	7.83079050925926	7.848875	7.64994560185185	7.76206944444444	28411139
2010-03-04	7.7584525462963	7.95014814814815	7.72228356481481	7.83802430555555	37632084
2010-03-05	7.81993981481481	7.89951157407407	7.74036805555555	7.7584525462963	29184210
2010-03-08	8.02971990740741	8.10205787037037	7.7439849537037	7.83802430555555	44105392
2010-03-09	8.01886921296296	8.18162962962963	7.90312847222222	8.04057060185185	39436014
2010-03-10	7.86695949074074	8.11290856481481	7.848875	7.97908333333333	21105884
2010-03-11	7.96099884259259	8.07312268518518	7.86334259259259	7.92121296296296	24121835
2010-03-12	7.69334837962963	7.92121296296296	7.67888078703703	7.92121296296296	28307335
2010-03-15	7.50165277777778	7.67888078703703	7.43293171296296	7.67888078703703	18908995
2010-03-16	7.55952314814815	7.58845833333333	7.44739930555555	7.50165277777778	19684875
2010-03-17	7.79100462962963	7.79462152777778	7.52697106481482	7.58484143518518	19285971
2010-03-18	7.74036805555555	7.90312847222222	7.71504976851852	7.81270601851852	21815220
2010-03-19	7.73675115740741	7.79462152777778	7.61377662037037	7.74036805555555	17661472
2010-03-22	7.77653703703704	7.87419328703704	7.69696527777778	7.69696527777778	19525678
2010-03-23	7.66079629629629	7.81632291666667	7.61739351851852	7.79462152777778	15934945
2010-03-24	7.64994560185185	7.79462152777778	7.62824421296296	7.66803009259259	21098292
2010-03-25	7.46910069444444	7.63909490740741	7.46186689814815	7.63547800925926	16607431
2010-03-26	7.6535625	7.75483564814815	7.42208101851852	7.46910069444444	22346079
2010-03-29	7.92482986111111	8.03333680555555	7.6463287037037	7.70781597222222	44416328
2010-03-30	7.95738194444444	8.00440162037037	7.84525810185185	7.95014814814815	25304341
2010-03-31	7.79462152777778	7.96461574074074	7.75121875	7.95738194444444	30554950
2010-04-01	7.86695949074074	7.9392974537037	7.74760185185185	7.81993981481481	30515892
2010-04-02	7.87781018518518	7.90312847222222	7.79823842592593	7.88866087962963	19590002
2010-04-06	7.8561087962963	8.03333680555555	7.81632291666667	7.92482986111111	23650932
2010-04-07	7.66803009259259	7.87781018518518	7.60654282407407	7.848875	31842226
2010-04-08	7.56675694444445	7.66079629629629	7.47633449074074	7.65717939814815	44838723
2010-04-09	7.59930902777778	7.62824421296296	7.54143865740741	7.56675694444445	22040960
2010-04-12	7.39314583333333	7.63547800925926	7.33889236111111	7.62101041666666	49477064
2010-04-13	7.50526967592593	7.58122453703704	7.37867824074074	7.42208101851852	44918697
2010-04-14	7.44378240740741	7.52335416666666	7.37144444444445	7.50526967592593	33185241
2010-04-15	7.50526967592593	7.50526967592593	7.3533599537037	7.46186689814815	35701750
2010-04-16	7.36421064814815	7.46186689814815	7.3533599537037	7.46186689814815	28646797
2010-04-19	6.66614930555555	7.20868402777778	6.63359722222222	7.19783333333333	82687425
2010-04-20	6.55402546296296	6.75657175925926	6.45636921296296	6.68061689814815	43513433
2010-04-21	6.68423379629629	6.69508449074074	6.49253819444445	6.56849305555555	37358846
2010-04-22	6.4889212962963	6.63721412037037	6.38764814814815	6.63721412037037	45221008
2010-04-23	6.69508449074074	6.83976041666666	6.41658333333333	6.50700578703704	55604571
2010-04-26	6.61551273148148	6.76380555555555	6.52870717592593	6.63721412037037	32231493
2010-04-27	6.58296064814815	6.71316898148148	6.4744537037037	6.55764236111111	34890388
2010-04-28	6.68785069444444	6.70231828703704	6.49253819444445	6.54317476851852	33493883
2010-04-29	6.69870138888889	6.8650787037037	6.68423379629629	6.75295486111111	36824242
2010-04-30	6.83976041666666	6.85061111111111	6.68785069444444	6.72763657407407	32434462
2010-05-04	6.63721412037037	6.74572106481481	6.55402546296296	6.67338310185185	28674710
2010-05-05	6.60104513888889	6.71678587962963	6.40573263888889	6.6697662037037	65042244
2010-05-06	6.05851041666667	6.52509027777778	6.02595833333333	6.52509027777778	68579660
2010-05-07	6.00787384259259	6.11276388888889	5.89575	5.92468518518518	41257999
2010-05-10	6.06936111111111	6.15978356481481	5.98255555555555	6.04042592592593	38641688
2010-05-11	5.72213888888889	6.23573842592593	5.71852199074074	6.22488773148148	56171655
2010-05-12	5.95362037037037	6.02234143518518	5.6100150462963	5.66065162037037	52104082
2010-05-13	6.15978356481481	6.24658912037037	5.91383449074074	5.91745138888889	56752700
2010-05-14	6.04042592592593	6.16340046296296	5.9861724537037	6.15978356481481	26562824
2010-05-17	5.7076712962963	5.92106828703704	5.67511921296296	5.91383449074074	32660779
2010-05-18	5.9029837962963	5.95362037037037	5.66065162037037	5.73298958333333	36190091
2010-05-19	5.82702893518518	5.97532175925926	5.7004375	5.81979513888889	25635625
2010-05-20	5.75107407407407	5.93191898148148	5.72575578703704	5.75830787037037	21828949
2010-05-21	5.84873032407407	5.86681481481481	5.55937847222222	5.58831365740741	22079549
2010-05-24	6.05489351851852	6.13084837962963	5.88489930555556	5.88489930555556	31791566
2010-05-25	5.83787962962963	6.00425694444444	5.82341203703704	5.9861724537037	24594616
2010-05-26	5.87766550925926	5.97532175925926	5.84511342592593	5.87043171296296	17161115
2010-05-27	5.93915277777778	5.95723726851852	5.71852199074074	5.86681481481481	27816665
2010-05-28	5.94276967592592	6.05489351851852	5.92106828703704	6.00425694444444	25397440
2010-05-31	5.73660648148148	5.9861724537037	5.73298958333333	5.87766550925926	27045758
2010-06-01	5.66065162037037	5.80171064814815	5.62086574074074	5.7076712962963	21809102
2010-06-02	5.63533333333333	5.7004375	5.52320949074074	5.64256712962963	25125605
2010-06-03	5.63171643518518	5.80894444444445	5.63171643518518	5.66426851851852	28756178
2010-06-04	5.66065162037037	5.73298958333333	5.6100150462963	5.62809953703704	13473513
2010-06-07	5.51959259259259	5.66065162037037	5.48342361111111	5.58831365740741	24149327
2010-06-08	5.44363773148148	5.55937847222222	5.37129976851852	5.52320949074074	17033017
2010-06-09	5.79447685185185	5.83787962962963	5.4002349537037	5.47618981481481	49574374
2010-06-10	5.59193055555555	5.72213888888889	5.58107986111111	5.64980092592593	28464074
2010-06-11	5.60639814814815	5.71852199074074	5.55214467592593	5.62809953703704	20998339
2010-06-18	5.66788541666667	5.82341203703704	5.60639814814815	5.62086574074074	44849256
2010-06-21	6.02234143518518	6.10191319444444	5.66426851851852	5.66426851851852	58980712
2010-06-22	6.10553009259259	6.21042013888889	5.95362037037037	6.00425694444444	41713771
2010-06-23	6.04042592592593	6.13808217592593	5.96085416666667	6.02234143518518	32467950
2010-06-24	6.10553009259259	6.20680324074074	5.99702314814815	6.02234143518518	23351519
2010-06-25	5.95362037037037	6.09467939814815	5.92468518518518	6.05489351851852	22750285
2010-06-28	6.0910625	6.13084837962963	5.93191898148148	5.93191898148148	24414809
2010-06-29	5.73660648148148	6.10553009259259	5.73298958333333	6.10553009259259	30668325
2010-09-02	5.98255555555555	6.27552430555555	5.87404861111111	6.27552430555555	163454210
2010-09-03	5.82702893518518	5.97532175925926	5.79447685185185	5.97532175925926	62412922
2010-09-06	5.9861724537037	6.05489351851852	5.83064583333333	5.86319791666667	60906962
2010-09-07	5.92830208333333	6.03680902777778	5.89213310185185	6.03680902777778	39285263
2010-09-08	5.78724305555555	5.88128240740741	5.73660648148148	5.88128240740741	49003578
2010-09-09	5.63171643518518	5.78724305555555	5.61363194444445	5.78724305555555	46989764
2010-09-10	5.62448263888889	5.7004375	5.55214467592593	5.6100150462963	25184777
2010-09-13	5.58469675925926	5.69682060185185	5.47257291666667	5.62809953703704	50222827
2010-09-14	5.61724884259259	5.68235300925926	5.58469675925926	5.60639814814815	29949471
2010-09-15	5.52320949074074	5.65703472222222	5.52320949074074	5.62448263888889	25923560
2010-09-16	5.41831944444444	5.60278125	5.38938425925926	5.55214467592593	28607640
2010-09-17	5.42555324074074	5.51597569444444	5.41108564814815	5.43278703703704	22079299
2010-09-20	5.44363773148148	5.53044328703704	5.37491666666667	5.43278703703704	19768687
2010-09-21	5.41108564814815	5.49065740740741	5.38938425925926	5.47257291666667	13399227
2010-09-27	5.44002083333333	5.46172222222222	5.34598148148148	5.42193634259259	18833173
2010-09-28	5.28449421296296	5.43278703703704	5.28449421296296	5.43278703703704	24652646
2010-09-29	5.27002662037037	5.34598148148148	5.23024074074074	5.27002662037037	21347578
2010-10-08	5.63171643518518	5.67511921296296	5.37129976851852	5.44363773148148	53671585
2010-10-11	5.92830208333333	6.04404282407407	5.66788541666667	5.66788541666667	87403016
2010-10-12	5.9029837962963	5.96808796296296	5.84149652777778	5.93553587962963	47759448
2010-10-13	6.10914699074074	6.11276388888889	5.9029837962963	5.91021759259259	82596178
2010-10-14	6.03680902777778	6.38041435185185	6.02595833333333	6.14893287037037	100374925
2010-10-15	6.32977777777778	6.41296643518518	5.97893865740741	5.9861724537037	116893821
2010-10-18	6.33701157407407	6.65891550925926	6.31169328703704	6.42020023148148	107408195
2010-10-19	6.4744537037037	6.50338888888889	6.21403703703704	6.31892708333333	58071926
2010-10-20	6.44551851851852	6.62998032407407	6.32977777777778	6.32977777777778	73972716
2010-10-21	6.22127083333333	6.45636921296296	6.19233564814815	6.44551851851852	55499968
2010-10-22	6.10191319444444	6.20680324074074	6.03319212962963	6.11276388888889	53822205
2010-10-25	6.24297222222222	6.26467361111111	6.00787384259259	6.11276388888889	46830575
2010-10-26	6.15254976851852	6.36594675925926	6.11276388888889	6.27552430555555	42230044
2010-10-27	6.11638078703704	6.30445949074074	6.04042592592593	6.12723148148148	39503155
2010-10-28	6.19233564814815	6.23935532407407	6.06936111111111	6.13084837962963	38463140
2010-10-29	6.06212731481481	6.20680324074074	6.03680902777778	6.19956944444444	35857718
2010-11-01	6.11999768518518	6.18510185185185	6.06936111111111	6.0910625	59127284
2010-11-02	6.15254976851852	6.22127083333333	6.04042592592593	6.11999768518518	63981741
2010-11-03	6.2936087962963	6.38764814814815	6.06212731481481	6.14169907407407	91079640
2010-11-04	6.24658912037037	6.32977777777778	6.18510185185185	6.25020601851852	61345827
2010-11-05	6.25020601851852	6.34424537037037	6.19956944444444	6.31169328703704	50395937
2010-11-08	6.32616087962963	6.41658333333333	6.26467361111111	6.26467361111111	62519447
2010-11-09	6.14893287037037	6.34062847222222	6.13084837962963	6.33339467592593	56692623
2010-11-10	5.96085416666667	6.11276388888889	5.95000347222222	6.10914699074074	57120450
2010-11-11	6.07297800925926	6.15254976851852	5.94276967592592	5.9861724537037	67968660
2010-11-12	5.62086574074074	6.01872453703704	5.59916435185185	5.98978935185185	61625685
2010-11-15	5.66426851851852	5.66788541666667	5.54852777777778	5.64256712962963	43991846
2010-11-16	5.44363773148148	5.66065162037037	5.42917013888889	5.66065162037037	44266710
2010-11-17	5.47980671296296	5.57746296296296	5.37491666666667	5.39661805555556	33927446
2010-11-18	5.61724884259259	5.64980092592593	5.4978912037037	5.52682638888889	43733956
2010-11-19	5.55576157407407	5.63171643518518	5.40385185185185	5.62448263888889	43301461
2010-11-22	5.43640393518518	5.4978912037037	5.40746875	5.47980671296296	35349870
2010-11-23	5.38938425925926	5.44363773148148	5.28087731481482	5.4002349537037	32938478
2010-11-24	5.46533912037037	5.51597569444444	5.33874768518518	5.35321527777778	31836654
2010-11-25	5.53406018518518	5.5955474537037	5.40746875	5.48342361111111	38293999
2010-11-26	5.44002083333333	5.52682638888889	5.42555324074074	5.52682638888889	23703058
2010-11-29	5.45087152777778	5.50874189814815	5.36406597222222	5.40385185185185	20063995
2010-11-30	5.33151388888889	5.47618981481481	5.25555902777778	5.42555324074074	28262144
2010-12-01	5.36768287037037	5.39300115740741	5.29896180555555	5.33151388888889	15427254
2010-12-02	5.37491666666667	5.47618981481481	5.36406597222222	5.44725462962963	20269979
2010-12-03	5.39661805555556	5.42555324074074	5.35321527777778	5.39300115740741	15700622
2010-12-06	5.45810532407407	5.50874189814815	5.37129976851852	5.40746875	21792398
2010-12-07	5.45448842592593	5.49065740740741	5.34236458333333	5.44002083333333	19954522
2010-12-08	5.36768287037037	5.45810532407407	5.35321527777778	5.44363773148148	17288608
2010-12-09	5.26640972222222	5.36768287037037	5.26279282407407	5.36044907407407	24029374
2010-12-10	5.31342939814815	5.32789699074074	5.22662384259259	5.26279282407407	19834112
2010-12-13	5.4147025462963	5.42193634259259	5.28449421296296	5.3170462962963	28080363
2010-12-14	5.38576736111111	5.42555324074074	5.36406597222222	5.4147025462963	23751670
2010-12-15	5.40385185185185	5.47980671296296	5.37491666666667	5.40746875	28127659
2010-12-16	5.35321527777778	5.45087152777778	5.34598148148148	5.4147025462963	22055606
2010-12-17	5.3170462962963	5.37129976851852	5.29534490740741	5.35321527777778	17302092
2010-12-20	5.23747453703704	5.34959837962963	5.18683796296296	5.33151388888889	25620545
2010-12-21	5.39661805555556	5.42555324074074	5.21577314814815	5.25194212962963	30685363
2010-12-22	5.27364351851852	5.41831944444444	5.26279282407407	5.41108564814815	22703588
2010-12-24	5.34959837962963	5.40746875	5.24470833333333	5.26279282407407	28612724
2010-12-27	5.21577314814815	5.45448842592593	5.19768865740741	5.4147025462963	30865798
2010-12-28	5.17237037037037	5.27002662037037	5.17237037037037	5.2193900462963	26556645
2010-12-29	5.1072662037037	5.18322106481481	5.04577893518518	5.17237037037037	23683256
2010-12-30	5.07109722222222	5.11811689814815	5.01322685185185	5.1072662037037	17826665
2010-12-31	5.1145	5.14343518518519	5.04216203703704	5.07471412037037	24089142
2011-01-04	5.19768865740741	5.25555902777778	5.06386342592593	5.12535069444445	35884061
2011-01-05	5.16513657407407	5.23747453703704	5.15790277777778	5.18683796296296	23746263
2011-01-06	5.1217337962963	5.2193900462963	5.08194791666667	5.16513657407407	20653127
2011-01-07	5.33874768518518	5.47257291666667	5.08194791666667	5.11811689814815	77048221
2011-01-10	5.18322106481481	5.33513078703704	5.15428587962963	5.27364351851852	36187213
2011-01-11	5.25917592592593	5.29534490740741	5.14705208333333	5.15428587962963	20820063
2011-01-12	5.33513078703704	5.34236458333333	5.23024074074074	5.27364351851852	27713344
2011-01-13	5.31342939814815	5.38938425925926	5.3025787037037	5.36406597222222	19481115
2011-01-14	5.18683796296296	5.29534490740741	5.18322106481481	5.29534490740741	20691457
2011-01-17	4.96620717592593	5.16513657407407	4.95897337962963	5.1217337962963	26616457
2011-01-18	4.95173958333333	4.99152546296296	4.92280439814815	4.97344097222222	15555469
2011-01-19	5.00599305555555	5.01684375	4.9119537037037	4.95535648148148	16794489
2011-01-20	4.79982986111111	5.00237615740741	4.79982986111111	5.00237615740741	28757900
2011-01-21	4.88301851851852	5.04577893518518	4.77812847222222	4.78174537037037	22997723
2011-01-24	4.84684953703704	4.90110300925926	4.81068055555555	4.88301851851852	15382697
2011-01-25	4.89025231481481	4.91557060185185	4.8287650462963	4.86855092592593	13420138
2011-01-26	4.92280439814815	4.93727199074074	4.87578472222222	4.88301851851852	10506028
2011-01-27	4.94812268518518	4.97344097222222	4.8287650462963	4.88301851851852	25551127
2011-01-28	4.90110300925926	4.95897337962963	4.85046643518519	4.94450578703704	18541949
2011-01-31	4.94088888888889	4.94812268518518	4.86131712962963	4.90110300925926	14024473
2011-02-01	4.98790856481481	5.00599305555555	4.92280439814815	4.94450578703704	15169758
2011-02-09	4.9191875	5.02769444444445	4.9119537037037	4.95535648148148	16650833
2011-02-10	4.99152546296296	4.99875925925926	4.90110300925926	4.9191875	13682225
2011-02-11	5.0096099537037	5.04216203703704	4.93727199074074	4.96620717592593	22582808
2011-02-14	5.19045486111111	5.22300694444444	5.00237615740741	5.00599305555555	41765667
2011-02-15	5.12535069444445	5.2193900462963	5.1217337962963	5.19407175925926	32109851
2011-02-16	5.14705208333333	5.17237037037037	5.08918171296296	5.1217337962963	18320572
2011-02-17	5.18322106481481	5.25194212962963	5.13258449074074	5.17598726851852	25381007
2011-02-18	5.18322106481481	5.22662384259259	5.11811689814815	5.15428587962963	22880239
2011-02-21	5.17960416666667	5.19045486111111	5.10003240740741	5.11811689814815	31654343
2011-02-22	4.99875925925926	5.18683796296296	4.99514236111111	5.18322106481481	34395853
2011-02-23	5.03854513888889	5.08918171296296	4.99875925925926	5.00599305555555	35743431
2011-02-24	5.03131134259259	5.04216203703704	4.97344097222222	5.03854513888889	20230781
2011-02-25	5.15066898148148	5.25194212962963	4.99514236111111	5.04939583333333	50926394
2011-02-28	5.16513657407407	5.18322106481481	5.05662962962963	5.1217337962963	30763735
2011-03-01	5.2049224537037	5.25917592592593	5.14343518518519	5.17237037037037	48277554
2011-03-02	5.25555902777778	5.29896180555555	5.15790277777778	5.17237037037037	48810709
2011-03-03	5.33513078703704	5.46895601851852	5.25555902777778	5.26279282407407	98048937
2011-03-04	5.43640393518518	5.46172222222222	5.3025787037037	5.35321527777778	50539628
2011-03-07	5.45810532407407	5.54129398148148	5.38938425925926	5.47257291666667	49762450
2011-03-08	5.42555324074074	5.50150810185185	5.39661805555556	5.45810532407407	32181261
2011-03-09	5.44002083333333	5.505125	5.43640393518518	5.44363773148148	32364768
2011-03-10	5.28087731481482	5.40746875	5.27002662037037	5.40746875	30849383
2011-03-11	5.20853935185185	5.29534490740741	5.20130555555555	5.25555902777778	23016686
2011-03-14	5.25194212962963	5.25917592592593	5.18683796296296	5.19045486111111	21799970
2011-03-15	5.13258449074074	5.22662384259259	5.08194791666667	5.19768865740741	28438142
2011-03-16	5.17237037037037	5.19045486111111	5.09641550925926	5.13981828703704	24207567
2011-03-17	5.08556481481482	5.15428587962963	5.07471412037037	5.12535069444445	20726243
2011-03-18	5.12896759259259	5.15066898148148	5.10003240740741	5.15066898148148	14524328
2011-03-21	5.1072662037037	5.15066898148148	5.08918171296296	5.11811689814815	16015761
2011-03-22	5.19407175925926	5.20853935185185	5.06386342592593	5.12896759259259	25194371
2011-03-23	5.22662384259259	5.24470833333333	5.16151967592593	5.17598726851852	22679887
2011-03-24	5.18322106481481	5.22662384259259	5.17237037037037	5.22300694444444	16012496
2011-03-25	5.28449421296296	5.31342939814815	5.17598726851852	5.18322106481481	36086255
2011-03-28	5.3098125	5.4147025462963	5.30619560185185	5.32428009259259	36793238
2011-03-29	5.37129976851852	5.46172222222222	5.3025787037037	5.32066319444444	48258736
2011-03-30	5.32789699074074	5.44363773148148	5.3170462962963	5.36406597222222	27507684
2011-03-31	5.2193900462963	5.35683217592593	5.19407175925926	5.32789699074074	21336829
2011-04-01	5.39661805555556	5.4002349537037	5.21577314814815	5.2193900462963	32324047
2011-04-06	5.55214467592593	5.58107986111111	5.40746875	5.40746875	74524386
2011-04-07	5.62448263888889	5.68596990740741	5.4978912037037	5.55214467592593	64881087
2011-04-08	5.61363194444445	5.63895023148148	5.53767708333333	5.6100150462963	26811761
2011-04-11	5.56299537037037	5.75107407407407	5.55214467592593	5.61724884259259	56381824
2011-04-12	5.57384606481481	5.67873611111111	5.54129398148148	5.58831365740741	38618173
2011-04-13	5.93191898148148	5.93191898148148	5.5123587962963	5.55214467592593	72385124
2011-04-14	5.98255555555555	6.13084837962963	5.95000347222222	6.0838287037037	104925065
2011-04-15	6.17786805555556	6.19233564814815	5.96808796296296	5.98978935185185	67079415
2011-04-18	6.22850462962963	6.23212152777778	6.07659490740741	6.15616666666667	58014896
2011-04-19	6.06936111111111	6.18510185185185	6.03319212962963	6.14169907407407	52577707
2011-04-20	5.93915277777778	6.11276388888889	5.88128240740741	6.06936111111111	48925674
2011-04-21	5.95723726851852	6.06936111111111	5.93191898148148	5.9861724537037	31806222
2011-04-22	5.86319791666667	5.96085416666667	5.81617824074074	5.91383449074074	30666850
2011-04-25	5.94276967592592	6.01149074074074	5.8053275462963	5.87043171296296	35864668
2011-04-26	6.06574421296296	6.07297800925926	5.90660069444445	5.92830208333333	38943064
2011-04-27	6.01510763888889	6.1959525462963	5.94638657407407	6.06936111111111	53270504
2011-04-28	6.13808217592593	6.27552430555555	6.04404282407407	6.06574421296296	64895809
2011-04-29	5.9861724537037	6.13084837962963	5.88128240740741	6.13084837962963	50049593
2011-05-03	5.99340625	6.04404282407407	5.93915277777778	5.96808796296296	22105844
2011-05-04	5.86319791666667	6.03680902777778	5.79809375	5.91383449074074	39381978
2011-05-05	5.81617824074074	5.88489930555556	5.77639236111111	5.78000925925926	24603790
2011-05-06	5.74745717592593	5.85596412037037	5.71852199074074	5.75107407407407	24111905
2011-05-13	5.79447685185185	5.81256134259259	5.55214467592593	5.73298958333333	36798422
2011-05-16	5.60639814814815	5.78362615740741	5.60278125	5.71852199074074	19710485
2011-05-17	5.86319791666667	5.9029837962963	5.60639814814815	5.60639814814815	31970891
2011-05-18	5.95362037037037	6.06212731481481	5.79447685185185	5.81979513888889	29415320
2011-05-19	5.8885162037037	6.04404282407407	5.87043171296296	5.97532175925926	16459997
2011-05-20	6.03680902777778	6.12723148148148	5.87404861111111	5.88489930555556	31190030
2011-05-23	5.87766550925926	6.02234143518518	5.78362615740741	6.01149074074074	32912056
2011-05-24	5.97170486111111	6.03680902777778	5.84149652777778	5.84149652777778	29158742
2011-05-26	5.83787962962963	5.95000347222222	5.77277546296296	5.8885162037037	29474005
2011-05-27	5.76915856481482	5.90660069444445	5.76915856481482	5.8053275462963	23833087
2011-05-30	5.75830787037037	5.8053275462963	5.64980092592593	5.72213888888889	15090147
2011-05-31	5.7908599537037	5.81979513888889	5.61363194444445	5.75830787037037	19360769
2011-06-01	5.7076712962963	5.78724305555555	5.67150231481481	5.78724305555555	18103530
2011-06-02	5.44363773148148	5.67150231481481	5.36768287037037	5.62448263888889	43960073
2011-06-03	5.44725462962963	5.47618981481481	5.36768287037037	5.41108564814815	15453683
2011-06-07	5.4978912037037	5.52320949074074	5.35321527777778	5.38938425925926	14608911
2011-06-08	5.44002083333333	5.48704050925926	5.36406597222222	5.48704050925926	16075948
2011-06-09	5.38938425925926	5.48342361111111	5.38215046296296	5.40746875	12022235
2011-06-10	5.38215046296296	5.46172222222222	5.33513078703704	5.37491666666667	14557106
2011-06-13	5.3025787037037	5.35321527777778	5.23024074074074	5.33151388888889	16282265
2011-06-14	5.37491666666667	5.48704050925926	5.28087731481482	5.29896180555555	27898386
2011-06-15	5.28449421296296	5.4147025462963	5.28449421296296	5.35683217592593	16867712
2011-06-16	5.17960416666667	5.27364351851852	5.16513657407407	5.24109143518519	17385079
2011-06-17	5.15066898148148	5.23385763888889	5.13620138888889	5.2049224537037	19132951
2011-06-20	5.19768865740741	5.2049224537037	5.10003240740741	5.15428587962963	12269128
2011-06-21	5.29172800925926	5.3098125	5.18683796296296	5.21215625	19391196
2011-06-22	5.28449421296296	5.33874768518518	5.25555902777778	5.29896180555555	15194027
2011-06-23	5.40746875	5.43278703703704	5.24470833333333	5.26279282407407	16588875
2011-06-24	5.54852777777778	5.62086574074074	5.37129976851852	5.37853356481481	32282577
2011-06-27	5.58469675925926	5.74384027777778	5.52682638888889	5.54491087962963	28093322
2011-06-28	5.56661226851852	5.69682060185185	5.47618981481481	5.69682060185185	20652919
2011-06-29	5.41831944444444	5.61363194444445	5.4002349537037	5.59916435185185	25898152
2011-06-30	5.57746296296296	5.62809953703704	5.43278703703704	5.44002083333333	27584004
2011-07-01	5.52682638888889	5.60639814814815	5.49065740740741	5.60639814814815	24878949
2011-07-04	5.75107407407407	5.75469097222222	5.54129398148148	5.54852777777778	37824912
2011-07-05	5.69682060185185	5.74384027777778	5.65341782407407	5.73298958333333	19056022
2011-07-06	5.63895023148148	5.68596990740741	5.57022916666667	5.66426851851852	20647586
2011-07-07	5.65703472222222	5.78000925925926	5.60278125	5.73298958333333	33785505
2011-07-08	5.74022337962963	5.84149652777778	5.63171643518518	5.65703472222222	26960365
2011-07-11	5.69682060185185	5.78000925925926	5.67873611111111	5.6932037037037	16173487
2011-07-12	5.55214467592593	5.65341782407407	5.53044328703704	5.64980092592593	24514304
2011-07-13	5.74745717592593	5.81256134259259	5.59916435185185	5.64256712962963	32429428
2011-07-14	5.76192476851852	5.78724305555555	5.68958680555555	5.75830787037037	24447810
2011-07-15	5.91021759259259	5.9861724537037	5.6932037037037	5.75107407407407	37573799
2011-07-18	5.89213310185185	5.96085416666667	5.83787962962963	5.91383449074074	19781464
2011-07-19	5.74745717592593	5.82702893518518	5.72575578703704	5.82341203703704	21935526
2011-07-20	5.74745717592593	5.81979513888889	5.68958680555555	5.80171064814815	14593499
2011-07-21	5.61724884259259	5.75469097222222	5.61363194444445	5.74022337962963	18897122
2011-07-22	5.62809953703704	5.71490509259259	5.60639814814815	5.64256712962963	12273319
2011-07-25	5.505125	5.64618402777778	5.46172222222222	5.58831365740741	19707011
2011-07-26	5.63533333333333	5.66065162037037	5.47980671296296	5.50874189814815	17324249
2011-07-27	5.61724884259259	5.67511921296296	5.55937847222222	5.57022916666667	15007940
2011-07-28	5.4978912037037	5.55937847222222	5.45087152777778	5.55576157407407	18780609
2011-07-29	5.67511921296296	5.82341203703704	5.44363773148148	5.52320949074074	31350764
2011-08-01	5.62448263888889	5.74022337962963	5.54491087962963	5.62448263888889	20792007
2011-08-02	5.55214467592593	5.5955474537037	5.45448842592593	5.57022916666667	19388301
2011-08-03	5.50150810185185	5.58107986111111	5.45087152777778	5.47257291666667	14194473
2011-08-04	5.5123587962963	5.62448263888889	5.505125	5.5123587962963	11502275
2011-08-05	5.29896180555555	5.4147025462963	5.29534490740741	5.38576736111111	24826954
2011-08-08	5.19045486111111	5.37491666666667	5.10003240740741	5.27002662037037	25034798
2011-08-09	5.20130555555555	5.27364351851852	5.02769444444445	5.09641550925926	27088571
2011-08-10	5.22300694444444	5.33513078703704	5.2193900462963	5.28087731481482	18298391
2011-08-11	5.34598148148148	5.36406597222222	5.11811689814815	5.12896759259259	18987370
2011-08-12	5.42193634259259	5.44363773148148	5.33513078703704	5.36768287037037	18053417
2011-08-15	5.59916435185185	5.64256712962963	5.32428009259259	5.42555324074074	30852781
2011-08-16	5.57022916666667	5.65703472222222	5.54491087962963	5.58469675925926	19781800
2011-08-18	5.45448842592593	5.67150231481481	5.43278703703704	5.58107986111111	25245981
2011-08-19	5.40746875	5.41831944444444	5.29534490740741	5.33513078703704	15545149
2011-08-22	5.34236458333333	5.42193634259259	5.28811111111111	5.38576736111111	12807347
2011-08-23	5.42193634259259	5.44002083333333	5.32428009259259	5.34959837962963	10465458
2011-08-24	5.33151388888889	5.45448842592593	5.3170462962963	5.43640393518518	12520897
2011-08-25	5.67511921296296	5.68596990740741	5.33151388888889	5.37129976851852	46535409
2011-08-26	5.68958680555555	5.6932037037037	5.59916435185185	5.62448263888889	25855821
2011-08-29	5.45087152777778	5.55214467592593	5.39300115740741	5.55214467592593	45187136
2011-08-30	5.43640393518518	5.5955474537037	5.43278703703704	5.48704050925926	22000548
2011-08-31	5.4978912037037	5.55937847222222	5.38938425925926	5.44363773148148	13043411
2011-09-01	5.52682638888889	5.57022916666667	5.47618981481481	5.4978912037037	11465355
2011-09-05	5.35321527777778	5.43640393518518	5.32066319444444	5.40746875	13828628
2011-09-06	5.32066319444444	5.37491666666667	5.29896180555555	5.3170462962963	11350557
2011-09-07	5.42917013888889	5.46533912037037	5.31342939814815	5.36768287037037	13007207
2011-09-08	5.39661805555556	5.45810532407407	5.37853356481481	5.42917013888889	10076662
2011-09-09	5.36406597222222	5.505125	5.32428009259259	5.42555324074074	10662894
2011-09-13	5.37853356481481	5.38215046296296	5.24832523148148	5.26279282407407	10320508
2011-09-14	5.34236458333333	5.40385185185185	5.24832523148148	5.38576736111111	14722697
2011-09-15	5.39300115740741	5.43640393518518	5.33874768518518	5.35321527777778	17064236
2011-09-16	5.55214467592593	5.58831365740741	5.4147025462963	5.42555324074074	36953539
2011-09-19	5.40746875	5.48704050925926	5.39300115740741	5.48342361111111	10599840
2011-09-20	5.45810532407407	5.52320949074074	5.37129976851852	5.38938425925926	7712700
2011-09-21	5.57384606481481	5.62448263888889	5.41108564814815	5.45810532407407	18368645
2011-09-22	5.44363773148148	5.53044328703704	5.43640393518518	5.50874189814815	15644754
2011-09-23	5.4147025462963	5.49065740740741	5.3098125	5.33874768518518	15181093
2011-09-26	5.2049224537037	5.46533912037037	5.18322106481481	5.34598148148148	19813812
2011-09-27	5.25194212962963	5.29896180555555	5.15790277777778	5.26279282407407	13761782
2011-09-28	5.19045486111111	5.29172800925926	5.15428587962963	5.29172800925926	9670343
2011-09-29	5.2049224537037	5.23747453703704	5.13258449074074	5.15428587962963	11315764
2011-09-30	5.2049224537037	5.27002662037037	5.19045486111111	5.2193900462963	14204046
2011-10-10	5.0096099537037	5.2049224537037	4.99152546296296	5.17237037037037	20965594
2011-10-11	5.06386342592593	5.22300694444444	5.0240775462963	5.19045486111111	21464906
2011-10-12	5.32066319444444	5.33513078703704	5.00599305555555	5.02769444444445	27447241
2011-10-13	5.3170462962963	5.34598148148148	5.27002662037037	5.28087731481482	14506496
2011-10-14	5.32066319444444	5.34236458333333	5.23385763888889	5.29534490740741	8695258
2011-10-17	5.38576736111111	5.44725462962963	5.34236458333333	5.36406597222222	11711517
2011-10-18	5.19768865740741	5.34959837962963	5.18683796296296	5.33874768518518	13801277
2011-10-19	5.21215625	5.29172800925926	5.19407175925926	5.23024074074074	8237424
2011-10-20	5.11811689814815	5.20130555555555	5.08194791666667	5.19045486111111	9245905
2011-10-21	5.20130555555555	5.25555902777778	5.1072662037037	5.15428587962963	14082651
2011-10-24	5.38215046296296	5.43278703703704	5.16513657407407	5.22662384259259	24059040
2011-10-25	5.42193634259259	5.46895601851852	5.33513078703704	5.37853356481481	19957370
2011-10-26	5.46172222222222	5.52682638888889	5.40746875	5.42555324074074	24416173
2011-10-27	5.45087152777778	5.52682638888889	5.41108564814815	5.46895601851852	14650097
2011-10-28	5.56299537037037	5.62448263888889	5.50874189814815	5.55214467592593	28495748
2011-10-31	5.50874189814815	5.58107986111111	5.41831944444444	5.56299537037037	14176696
2011-11-01	5.4978912037037	5.59193055555555	5.43640393518518	5.46533912037037	17930975
2011-11-02	5.5955474537037	5.5955474537037	5.4147025462963	5.42193634259259	19069442
2011-11-03	5.50874189814815	5.62086574074074	5.47257291666667	5.59193055555555	26232886
2011-11-04	5.54491087962963	5.57022916666667	5.49065740740741	5.55214467592593	13339644
2011-11-07	5.45087152777778	5.52320949074074	5.4147025462963	5.4978912037037	12957718
2011-11-08	5.45810532407407	5.505125	5.42917013888889	5.45810532407407	9670530
2011-11-09	5.53044328703704	5.53767708333333	5.43640393518518	5.47618981481481	11355254
2011-11-10	5.47257291666667	5.54129398148148	5.44363773148148	5.47257291666667	15843664
2011-11-11	5.39661805555556	5.49427430555555	5.37491666666667	5.46895601851852	16526727
2011-11-14	5.45448842592593	5.4978912037037	5.39661805555556	5.43640393518518	17925053
2011-11-15	5.36044907407407	5.45087152777778	5.32789699074074	5.43640393518518	21708890
2011-11-16	5.20130555555555	5.36406597222222	5.17960416666667	5.36044907407407	19927201
2011-11-17	5.18322106481481	5.23747453703704	5.16875347222222	5.2193900462963	10961862
2011-11-18	5.17237037037037	5.2193900462963	5.13981828703704	5.15066898148148	14386865
2011-11-21	5.17237037037037	5.17960416666667	5.11811689814815	5.17960416666667	13673657
2011-11-22	5.20853935185185	5.23385763888889	5.12535069444445	5.15428587962963	13281831
2011-11-23	5.10364930555556	5.24109143518519	5.08918171296296	5.22662384259259	18894417
2011-11-24	5.13258449074074	5.16151967592593	5.04216203703704	5.08556481481482	12146393
2011-11-25	5.1145	5.13981828703704	5.07833101851852	5.09279861111111	8446296
2011-11-28	5.11088310185185	5.16151967592593	5.08556481481482	5.12535069444445	9813225
2011-11-29	5.17598726851852	5.19407175925926	5.11811689814815	5.16875347222222	15649490
2011-11-30	5.01322685185185	5.17598726851852	5.00237615740741	5.17237037037037	19165719
2011-12-01	5.14705208333333	5.28811111111111	5.13620138888889	5.16513657407407	41183238
2011-12-02	5.17237037037037	5.19768865740741	5.09641550925926	5.1217337962963	18186014
2011-12-05	5.17237037037037	5.2049224537037	5.08194791666667	5.16875347222222	11349137
2011-12-07	5.20853935185185	5.24470833333333	5.13981828703704	5.15428587962963	14862428
2011-12-08	5.16875347222222	5.23747453703704	5.1217337962963	5.20853935185185	18705207
2011-12-09	5.13620138888889	5.17598726851852	5.1145	5.14705208333333	8686255
2011-12-12	5.13258449074074	5.17598726851852	5.08918171296296	5.13981828703704	8633134
2011-12-13	5.07471412037037	5.16513657407407	5.06024652777778	5.11811689814815	19000444
2011-12-14	5.04577893518518	5.10364930555556	5.0096099537037	5.07471412037037	8493106
2011-12-15	4.84684953703704	5.03854513888889	4.83599884259259	5.01322685185185	19273651
2011-12-16	4.93003819444445	4.96982407407407	4.80344675925926	4.85770023148148	15737768
2011-12-19	4.95535648148148	4.99514236111111	4.83599884259259	4.89025231481481	12810069
2011-12-20	4.94812268518518	5.03492824074074	4.9264212962963	4.93727199074074	9463751
2011-12-21	4.95173958333333	5.05301273148148	4.94088888888889	4.99875925925926	14660853
2011-12-22	4.99152546296296	5.03131134259259	4.90110300925926	4.94088888888889	10984934
2011-12-23	4.98067476851852	5.04939583333333	4.95897337962963	4.98429166666667	9946525
2011-12-26	4.98067476851852	5.02046064814815	4.95173958333333	4.97344097222222	7377643
2011-12-27	5.00237615740741	5.04939583333333	4.97344097222222	4.97705787037037	13879755
2011-12-28	4.93727199074074	5.03131134259259	4.86493402777778	4.98067476851852	11317934
2011-12-29	4.94088888888889	4.98067476851852	4.90471990740741	4.9191875	12859277
2011-12-30	5.04216203703704	5.04216203703704	4.93727199074074	4.95535648148148	26148736
2012-01-04	4.88663541666667	5.04216203703704	4.88301851851852	5.04216203703704	14791098
2012-01-05	4.96982407407407	5.02769444444445	4.87578472222222	4.88663541666667	24408005
2012-01-06	4.95535648148148	5.01322685185185	4.88301851851852	4.95535648148148	13315115
2012-01-09	5.11088310185185	5.1217337962963	4.9191875	4.95897337962963	22113866
2012-01-20	5.47257291666667	5.53044328703704	5.30619560185185	5.45448842592593	58667566
2012-01-30	5.44725462962963	5.53044328703704	5.41831944444444	5.48342361111111	33298845
2012-01-31	5.42193634259259	5.47980671296296	5.37129976851852	5.45087152777778	17326547
2012-02-01	5.35321527777778	5.47980671296296	5.34598148148148	5.4002349537037	18515899
2012-02-02	5.52320949074074	5.53767708333333	5.35321527777778	5.37129976851852	24462346
2012-02-03	5.54852777777778	5.56661226851852	5.44363773148148	5.50150810185185	22996446
2012-02-06	5.49065740740741	5.55937847222222	5.46895601851852	5.55214467592593	15780815
2012-02-07	5.40385185185185	5.47257291666667	5.38576736111111	5.45810532407407	12208636
2012-02-08	5.51597569444444	5.55576157407407	5.4002349537037	5.4002349537037	17227257
2012-02-10	5.51959259259259	5.54491087962963	5.47980671296296	5.47980671296296	18211847
2012-02-13	5.43640393518518	5.48342361111111	5.4002349537037	5.47618981481481	21506688
2012-02-14	5.40746875	5.45087152777778	5.36768287037037	5.42555324074074	10854644
2012-02-15	5.4147025462963	5.46533912037037	5.35321527777778	5.40385185185185	20130583
2012-02-16	5.35321527777778	5.44002083333333	5.32066319444444	5.4147025462963	27369217
2012-02-17	5.35321527777778	5.39661805555556	5.33513078703704	5.38576736111111	15069047
2012-02-20	5.35321527777778	5.46172222222222	5.34959837962963	5.45810532407407	22420577
2012-02-21	5.36768287037037	5.38576736111111	5.31342939814815	5.36406597222222	15026488
2012-02-22	5.4147025462963	5.42555324074074	5.34959837962963	5.36768287037037	31739776
2012-02-23	5.41831944444444	5.46533912037037	5.40385185185185	5.4147025462963	22626761
2012-02-24	5.505125	5.505125	5.38215046296296	5.44002083333333	36410465
2012-02-27	5.52320949074074	5.62086574074074	5.46533912037037	5.51597569444444	44761711
2012-02-28	5.64256712962963	5.72575578703704	5.51597569444444	5.52682638888889	46014184
2012-02-29	5.58831365740741	5.64980092592593	5.55937847222222	5.64980092592593	26302462
2012-03-01	5.63533333333333	5.71128819444444	5.57384606481481	5.58107986111111	29162131
2012-03-02	5.72575578703704	5.73298958333333	5.63171643518518	5.63533333333333	29097318
2012-03-05	5.64980092592593	5.83426273148148	5.63171643518518	5.74384027777778	35041730
2012-03-06	5.53406018518518	5.66065162037037	5.51597569444444	5.62809953703704	33137414
2012-03-07	5.47980671296296	5.56299537037037	5.46172222222222	5.47980671296296	20137130
2012-03-08	5.56299537037037	5.6100150462963	5.4978912037037	5.52320949074074	28878270
2012-03-09	5.505125	5.53044328703704	5.42917013888889	5.51597569444444	53053644
2012-03-12	5.44363773148148	5.50874189814815	5.42193634259259	5.50874189814815	27064787
2012-03-13	5.4978912037037	5.50874189814815	5.43640393518518	5.46172222222222	23753057
2012-03-14	5.36406597222222	5.56661226851852	5.34959837962963	5.52320949074074	43996405
2012-03-15	5.28087731481482	5.4002349537037	5.28087731481482	5.36768287037037	25804871
2012-03-16	5.33513078703704	5.33874768518518	5.24832523148148	5.28811111111111	16786552
2012-03-19	5.3170462962963	5.33513078703704	5.26279282407407	5.31342939814815	16746474
2012-03-20	5.21577314814815	5.3098125	5.20853935185185	5.30619560185185	20304048
2012-03-21	5.22662384259259	5.27002662037037	5.19768865740741	5.26279282407407	15040403
2012-03-22	5.25917592592593	5.29172800925926	5.17960416666667	5.23024074074074	17938849
2012-03-23	5.19407175925926	5.23747453703704	5.17598726851852	5.23024074074074	11901609
2012-03-26	5.2049224537037	5.2193900462963	5.18322106481481	5.19768865740741	8246121
2012-03-27	5.21577314814815	5.24832523148148	5.20853935185185	5.23024074074074	11120921
2012-03-28	5.11088310185185	5.22662384259259	5.10364930555556	5.21215625	20448297
2012-03-29	5.03492824074074	5.11088310185185	4.99514236111111	5.11088310185185	18886584
2012-03-30	5.08556481481482	5.09279861111111	5.04216203703704	5.05662962962963	10631246
2012-04-05	5.09641550925926	5.1145	4.99152546296296	5.08556481481482	18379254
2012-04-06	5.18683796296296	5.19407175925926	5.05662962962963	5.08194791666667	19387554
2012-04-09	5.10003240740741	5.15428587962963	5.08194791666667	5.15428587962963	9319714
2012-04-10	5.14705208333333	5.15066898148148	5.03854513888889	5.08918171296296	19699850
2012-04-11	5.12896759259259	5.16875347222222	5.06748032407407	5.07471412037037	10514365
2012-04-12	5.3098125	5.31342939814815	5.10003240740741	5.13258449074074	27577946
2012-04-13	5.29896180555555	5.41108564814815	5.26279282407407	5.3170462962963	33774471
2012-04-16	5.25555902777778	5.3170462962963	5.2193900462963	5.25917592592593	13367317
2012-04-17	5.18683796296296	5.27364351851852	5.18322106481481	5.24109143518519	11895119
2012-04-18	5.28449421296296	5.3098125	5.19768865740741	5.19768865740741	15960090
2012-04-19	5.32066319444444	5.32428009259259	5.26279282407407	5.29896180555555	13739186
2012-04-20	5.4002349537037	5.40746875	5.28087731481482	5.29896180555555	25807487
2012-04-23	5.34236458333333	5.4147025462963	5.3170462962963	5.38576736111111	19738112
2012-04-24	5.46533912037037	5.5955474537037	5.32789699074074	5.33513078703704	47804023
2012-04-25	5.50150810185185	5.50150810185185	5.4002349537037	5.4147025462963	20892365
2012-04-26	5.4002349537037	5.51959259259259	5.35683217592593	5.50874189814815	28341442
2012-04-27	5.39300115740741	5.46172222222222	5.36044907407407	5.41831944444444	16661706
2012-05-02	5.47257291666667	5.53044328703704	5.42193634259259	5.45087152777778	26117210
2012-05-03	5.41831944444444	5.49427430555555	5.41108564814815	5.47257291666667	16148709
2012-05-04	5.44725462962963	5.45448842592593	5.39661805555556	5.41108564814815	14029557
2012-05-07	5.40746875	5.45810532407407	5.36406597222222	5.41108564814815	25573094
2012-05-08	5.38576736111111	5.4002349537037	5.35321527777778	5.39300115740741	17512997
2012-05-09	5.24832523148148	5.36044907407407	5.23385763888889	5.35321527777778	21367675
2012-05-10	5.23747453703704	5.28449421296296	5.21577314814815	5.24832523148148	12942834
2012-05-11	5.19768865740741	5.26279282407407	5.19407175925926	5.23747453703704	16251980
2012-05-14	5.16875347222222	5.24832523148148	5.15428587962963	5.24109143518519	20696000
2012-05-15	5.19768865740741	5.21215625	5.11811689814815	5.15428587962963	13445478
2012-05-16	5.10364930555556	5.19045486111111	5.10003240740741	5.19045486111111	15030511
2012-05-17	5.16875347222222	5.17960416666667	5.10364930555556	5.11811689814815	13338999
2012-05-18	5.08918171296296	5.15790277777778	5.06748032407407	5.11811689814815	15786319
2012-05-21	5.1072662037037	5.13258449074074	5.08194791666667	5.08918171296296	8569485
2012-05-22	5.17960416666667	5.18683796296296	5.12896759259259	5.12896759259259	11359898
2012-05-24	5.08556481481482	5.15790277777778	5.07109722222222	5.14705208333333	19407374
2012-05-25	5.05301273148148	5.10364930555556	5.04577893518518	5.08918171296296	9892922
2012-05-28	5.1217337962963	5.1217337962963	5.01684375	5.05301273148148	13720237
2012-05-29	5.16513657407407	5.17598726851852	5.06386342592593	5.11811689814815	28680861
2012-05-30	5.08194791666667	5.14705208333333	5.04577893518518	5.13981828703704	21712593
2012-05-31	5.07833101851852	5.1072662037037	5.03131134259259	5.07109722222222	15325128
2012-06-01	5.11088310185185	5.14705208333333	5.06386342592593	5.08194791666667	15835304
2012-06-04	4.97344097222222	5.06024652777778	4.96620717592593	5.04939583333333	17177789
2012-06-05	4.92280439814815	4.99514236111111	4.92280439814815	4.98790856481481	24614407
2012-06-06	4.94450578703704	4.95535648148148	4.9191875	4.93727199074074	18886005
2012-06-07	4.90471990740741	5.00237615740741	4.89025231481481	4.98429166666667	13130248
2012-06-08	4.76004398148148	4.9264212962963	4.74557638888889	4.9191875	39755724
2012-06-11	4.75281018518518	4.80344675925926	4.72749189814815	4.77451157407407	26550911
2012-06-12	4.65877083333333	4.74919328703704	4.62983564814815	4.72025810185185	29815536
2012-06-13	4.77089467592593	4.79621296296296	4.64792013888889	4.67685532407407	26011662
2012-06-14	4.69855671296296	4.76004398148148	4.68770601851852	4.74195949074074	13047824
2012-06-15	4.88663541666667	4.95535648148148	4.723875	4.723875	42295157
2012-06-18	4.90471990740741	4.9119537037037	4.85046643518519	4.87940162037037	19873335
2012-06-19	4.9191875	4.96259027777778	4.86855092592593	4.88301851851852	14992460
2012-06-20	4.9119537037037	5.0096099537037	4.90110300925926	4.94812268518518	14370713
2012-06-21	4.79259606481482	4.9119537037037	4.77812847222222	4.90833680555556	14483296
2012-06-25	4.74557638888889	4.85046643518519	4.74557638888889	4.78536226851852	16435834
2012-06-26	4.79259606481482	4.83238194444445	4.75281018518518	4.76004398148148	13492363
2012-06-27	4.77812847222222	4.8142974537037	4.75642708333333	4.79621296296296	8177633
2012-06-28	4.7311087962963	4.8142974537037	4.723875	4.77812847222222	10084717
2012-06-29	4.88663541666667	4.9119537037037	4.72025810185185	4.74557638888889	18455457
2012-07-02	4.88301851851852	4.9119537037037	4.8287650462963	4.9119537037037	15564511
2012-07-03	4.87578472222222	4.93003819444445	4.83599884259259	4.86855092592593	12372795
2012-07-04	4.93003819444445	5.00237615740741	4.87578472222222	4.87578472222222	19766959
2012-07-05	4.89748611111111	4.94812268518518	4.88301851851852	4.9119537037037	10289670
2012-07-06	4.87940162037037	4.90110300925926	4.73834259259259	4.81068055555555	16545450
2012-07-09	4.723875	4.85046643518519	4.723875	4.85046643518519	16095224
2012-07-10	4.79621296296296	4.83961574074074	4.723875	4.72749189814815	12370989
2012-07-11	4.77812847222222	4.81791435185185	4.74919328703704	4.77812847222222	7544441
2012-07-12	4.78536226851852	4.80706365740741	4.70217361111111	4.76366087962963	19473086
2012-07-13	4.82153125	4.87940162037037	4.73834259259259	4.75642708333333	11070005
2012-07-16	4.77451157407407	4.85408333333333	4.77451157407407	4.8287650462963	10860266
2012-07-17	4.83961574074074	4.84323263888889	4.76366087962963	4.77451157407407	9160116
2012-07-18	4.83238194444445	4.83961574074074	4.77451157407407	4.82153125	7561238
2012-07-19	4.83599884259259	4.86493402777778	4.78536226851852	4.82514814814815	13626372
2012-07-20	4.77451157407407	4.8142974537037	4.76366087962963	4.78174537037037	10673403
2012-07-23	4.76004398148148	4.76004398148148	4.70579050925926	4.74195949074074	15049383
2012-07-24	4.75642708333333	4.81791435185185	4.73472569444444	4.73834259259259	10094330
2012-07-25	4.69855671296296	4.78174537037037	4.69132291666667	4.75642708333333	9840494
2012-07-26	4.70217361111111	4.76004398148148	4.68770601851852	4.69855671296296	7290309
2012-07-27	4.73834259259259	4.80706365740741	4.70217361111111	4.72749189814815	10966060
2012-07-30	4.77451157407407	4.85408333333333	4.74195949074074	4.74195949074074	11842631
2012-07-31	4.86493402777778	4.87578472222222	4.77812847222222	4.78897916666667	15313469
2012-08-01	4.88663541666667	4.90833680555556	4.8287650462963	4.85770023148148	12186730
2012-08-02	4.88663541666667	4.90110300925926	4.85046643518519	4.88663541666667	8907731
2012-08-03	4.88301851851852	4.89748611111111	4.83961574074074	4.88301851851852	9438713
2012-08-06	4.86493402777778	4.90833680555556	4.86493402777778	4.87578472222222	15331221
2012-08-07	4.8142974537037	4.88301851851852	4.80706365740741	4.86131712962963	15982578
2012-08-08	4.84323263888889	4.84684953703704	4.80706365740741	4.81068055555555	11754171
2012-08-09	4.84323263888889	4.84323263888889	4.79621296296296	4.83961574074074	8575072
2012-08-10	4.85770023148148	4.89025231481481	4.85408333333333	4.85408333333333	10549817
2012-08-13	4.83961574074074	4.89025231481481	4.83599884259259	4.86493402777778	10799064
2012-08-14	4.92280439814815	4.93727199074074	4.80706365740741	4.83961574074074	18037022
2012-08-15	4.86493402777778	4.91557060185185	4.83238194444445	4.88663541666667	11614215
2012-08-16	4.79621296296296	4.84323263888889	4.77812847222222	4.83961574074074	14681599
2012-08-17	4.85046643518519	4.86493402777778	4.78536226851852	4.79621296296296	10399698
2012-08-20	4.77451157407407	4.8287650462963	4.7311087962963	4.82514814814815	15579504
2012-08-21	4.75281018518518	4.78536226851852	4.73472569444444	4.77451157407407	13021973
2012-08-22	4.70940740740741	4.76004398148148	4.68770601851852	4.75642708333333	12518267
2012-08-23	4.69132291666667	4.73472569444444	4.66238773148148	4.71302430555556	13128906
2012-08-24	4.60090046296296	4.68408912037037	4.59728356481481	4.68047222222222	18817910
2012-08-27	4.50686111111111	4.60090046296296	4.48515972222222	4.59728356481481	16775926
2012-08-28	4.60090046296296	4.6334525462963	4.47792592592593	4.51409490740741	15910898
2012-08-29	4.56834837962963	4.58281597222222	4.5357962962963	4.57558217592593	6948365
2012-08-30	4.56834837962963	4.60090046296296	4.5213287037037	4.52494560185185	8987322
2012-08-31	4.5357962962963	4.62260185185185	4.5357962962963	4.55388078703704	8561919
2012-09-03	4.54303009259259	4.57558217592593	4.53217939814815	4.54664699074074	10112994
2012-09-04	4.42005555555556	4.55749768518518	4.40197106481481	4.54303009259259	20775580
2012-09-05	4.32963310185185	4.42005555555556	4.30069791666667	4.41282175925926	17219018
2012-09-06	4.36941898148148	4.37665277777778	4.30793171296296	4.33325	10356038
2012-09-07	4.54303009259259	4.61175115740741	4.38026967592593	4.39473726851852	28173773
2012-09-10	4.49239351851852	4.55026388888889	4.44899074074074	4.53941319444444	23677797
2012-09-11	4.47430902777778	4.48515972222222	4.43452314814815	4.47069212962963	8743686
2012-09-12	4.45984143518518	4.5213287037037	4.41643865740741	4.49601041666667	12245281
2012-09-13	4.42728935185185	4.47792592592593	4.42728935185185	4.45260763888889	8244257
2012-09-14	4.48515972222222	4.51771180555555	4.41643865740741	4.45984143518518	15327279
2012-09-17	4.36218518518519	4.47430902777778	4.35133449074074	4.47430902777778	11471438
2012-09-18	4.28984722222222	4.35133449074074	4.28261342592593	4.35133449074074	12250194
2012-09-19	4.2283599537037	4.31154861111111	4.18134027777778	4.29346412037037	18434609
2012-09-20	4.10900231481481	4.21750925925926	4.10538541666667	4.21750925925926	18134615
2012-09-21	4.06198263888889	4.11623611111111	4.04389814814815	4.10538541666667	15751258
2012-09-24	4.07283333333333	4.10538541666667	3.95709259259259	4.04028125	17905626
2012-09-25	4.01134606481481	4.06198263888889	3.99687847222222	4.06198263888889	9882594
2012-09-26	3.97517708333333	4.02943055555555	3.96070949074074	4.01496296296296	7078915
2012-09-27	4.11623611111111	4.19942476851852	3.97156018518519	3.97517708333333	21538709
2012-09-28	4.15240509259259	4.15963888888889	4.06559953703704	4.08730092592593	15095772
2012-10-08	4.09091782407407	4.18857407407407	4.06921643518518	4.15602199074074	10638633
2012-10-09	4.21027546296296	4.22474305555556	4.10538541666667	4.10538541666667	16481579
2012-10-10	4.21027546296296	4.21389236111111	4.17772337962963	4.21027546296296	9976558
2012-10-11	4.18495717592593	4.21389236111111	4.17048958333333	4.21389236111111	9574790
2012-10-12	4.21027546296296	4.26091203703704	4.18134027777778	4.20304166666667	10145190
2012-10-15	4.14155439814815	4.21750925925926	4.12346990740741	4.21389236111111	8911948
2012-10-16	4.18495717592593	4.23197685185185	4.1307037037037	4.15240509259259	12634649
2012-10-17	4.23559375	4.2428275462963	4.18857407407407	4.20304166666667	12188114
2012-10-18	4.28984722222222	4.30793171296296	4.23197685185185	4.2428275462963	15917879
2012-10-19	4.29708101851852	4.30793171296296	4.27176273148148	4.29346412037037	10071311
2012-10-22	4.31154861111111	4.3260162037037	4.24644444444444	4.27899652777778	13408932
2012-10-23	4.25006134259259	4.32239930555555	4.23921064814815	4.31516550925926	11680820
2012-10-24	4.24644444444444	4.28623032407407	4.22474305555556	4.23921064814815	8995284
2012-10-25	4.21750925925926	4.26452893518518	4.21027546296296	4.25729513888889	12337754
2012-10-26	4.11623611111111	4.25006134259259	4.10538541666667	4.23921064814815	17138011
2012-10-29	4.11985300925926	4.15963888888889	4.09453472222222	4.10538541666667	12964193
2012-10-30	4.17410648148148	4.19219097222222	4.11261921296296	4.11985300925926	14292166
2012-10-31	4.19942476851852	4.21750925925926	4.16325578703704	4.18495717592593	7512545
2012-11-01	4.27899652777778	4.3260162037037	4.19580787037037	4.19942476851852	13800345
2012-11-02	4.33325	4.34771759259259	4.27537962962963	4.27899652777778	16333697
2012-11-05	4.36218518518518	4.39835416666667	4.32239930555555	4.33686689814815	14675465
[truncated: 1,262 more rows]
