# Supplementary material for: An Empirical Study of Machine Learning Algorithms for Stock Daily Trading Strategy
Source: Hindawi journal article supplement (doi:10.1155/2019/7816154), 2019-01-01
Supplement: f1 [file 7816154.f1.zip › Optional Supplementary Materials(Data, code, and results)/CSICS/000001_TechIndi.csv]

	ATR	ADX	OBV	WR	RSI	CMF	BandPer	BandWid	CO	DIS	EOM	FI	MAO	MFI	MI	MOM	NCO	PO	PSY	RMI	ROC	SROC	SONAR	SONSIG	TRIX	VMA	VOS	VROC	Return	Sigma	CCI	RSV	Kvalue	Dvalue	Jvalue	MACD	AD	VOLA	NBIAS	Ret	SMA_5	SMA_10	EMA_5	EMA_10	Label
2004-04-02	0.0765113069800557	27.4774736674114	268701106	0.728260869565232	51.1557313398886	0.0562139844844388	0.397163297386105	0.10498322941003	1552911.57396443	98.9070394211381	3.74730769710824e-11	85403.9296207033	0.0274655973774576	42.7389087421388	227.735801246221	93.6485273396645	-0.13911146723647	-0.0208979248440916	0.5	-4.0674789863251	-0.0568222303086753	99.895833817275	0.162837400522805	0.20780205452775	0.129460540947357	14125073.1	-16.2561254420918	-0.854138527405606	-0.00178765903156537	0.0200755247148722	-72.4862011039119	0.271739130434768	0.267477727629077	0.334963538596688	0.132506105693853	0.884375272631122	41629631.8421037	-0.331847597589451	0.568399613233734	0.00468838373173186	2.3564760505698	2.40572150997151	2.37511380363276	2.38939209340885	0
2004-04-05	0.0769087683150179	25.8265149144961	260022417	0.880434782608708	47.6440309951687	0.0787375678459905	0.231442515980552	0.10252558908907	1274710.35511971	97.1866755110657	-3.3447448658471e-11	-120745.896211701	0.0154984442344235	37.6117182598555	236.513779903636	94.4954584881359	-0.1140714031339	-0.0112031730480504	0.4	-3.02856041941553	-0.0475907776848268	100.083811644695	0.155019834758285	0.197245610573857	0.0919413530387603	13894994.1	-17.4513387677079	-0.361495315869041	-0.00238829603137204	0.0203976724961052	-78.1874039938563	0.119565217391292	0.218173557549815	0.296033544914397	0.0624535828206507	0.645434396126432	37116713.5621043	-0.274188183533323	-0.571311012170455	-0.01650642094488	2.35925827991453	2.38568945868946	2.3635222425453	2.38047337103822	1
2004-04-06	0.07174177096052	24.1138141395882	271344511	0.781249999999988	49.251900624771	0.131478689684869	0.287450313336323	0.099480181955327	3618778.51343849	97.7556588644309	-1.57248652867108e-10	-74520.7359552799	0.000445870087298239	21.6732416206347	251.474341714896	97.2450969981146	-0.14467592592592	-0.00542085868739603	0.5	-1.02930277970574	-0.0595704563672926	100.161375204243	0.147375584922616	0.187271605443609	0.0588329433053536	14022508	-16.5306148801278	-1.22479370189457	-0.00458141010267001	0.0171287635463512	-81.2403100775188	0.218750000000012	0.218365705033214	0.270144264954003	0.114808585191636	0.506611148184377	46469747.7360202	-0.291366133387145	-0.0786311219940392	0.00710756895804077	2.36092761752137	2.37372587250712	2.36135899384311	2.37621139383832	0
2004-04-07	0.0663760429385421	22.5234491343165	261773701	0.924731182795681	45.7234421080174	0.0844614504608951	0.133836118261441	0.101062203044673	2622172.32124342	96.2345833678768	1.37494738850436e-11	-91895.3325320225	-0.018744378469937	24.5332235280233	263.844339599766	95.747977075961	-0.22257834757834	-0.00449398844369444	0.5	-1.23332370166265	-0.0916839339864089	100.359408703948	0.133898825048008	0.176597049364489	0.0243438782617567	14098075.6	-16.817938502653	-1.12598308556767	-0.00394684238076316	0.0164488604885399	-83.1399317406091	0.0752688172043193	0.170666742423582	0.236985090777196	0.0380300457163552	0.261074183726318	40276870.6771974	-0.30348305243865	-1.51692923921129	-0.0166635996275283	2.35258092948718	2.36315340099715	2.34693309109959	2.36564228325181	0
2004-04-08	0.063991274928775	21.5461739804272	250305231	0.989898989898987	42.8872961223543	0.0429560367506182	0.051369374488939	0.109113015468777	-442799.74323941	95.0681546755616	-1.05294326075003e-10	-377844.801682732	-0.0323880031412065	25.1162118680061	273.395100331998	94.6954132095983	-0.19197382478633	-0.00583629283405373	0.5	-0.524152968802439	-0.0806819210449439	100.625330257084	0.109259733421478	0.163129586175887	-0.0139689192827697	14062740.1	-15.6018730060616	-0.214732724376692	-0.00635207999986792	0.0152078685431247	-112.562814070352	0.0101010101010129	0.117144831649393	0.197038337734595	-0.042642180521012	-0.0476620433502939	30572780.6771975	-0.348850089729108	-2.41629886848004	-0.0145074794056199	2.3358875534188	2.34952047720798	2.32618690522499	2.35092451056526	0
2004-04-09	0.0663760429385421	21.5049562344691	238653146	0.94782608695654	39.5821986292179	0.0185235429796021	-0.0377911465251317	0.119766765758878	-3826000.93773438	93.5590493726927	-2.14577772211181e-10	-434588.278746037	-0.0386836887738311	15.44787845634	279.222593476426	96.4122301963622	-0.18084490740741	-0.0103642672613449	0.5	-0.241766029281177	-0.0775421227364993	100.971495541898	0.091652379941106	0.148834144928931	-0.0584922560792678	14241595.45	-14.3481544404289	-0.265332153289858	-0.00876896385100502	0.0141046506419204	-156.922175854748	0.0521739130434596	0.0954878587807483	0.163188178083313	-0.0399127798243806	-0.43224827709526	23033196.2654316	-0.219676017777545	-3.33730059904697	-0.0184354224710331	2.30862170584046	2.33254887820513	2.29844496791827	2.33129479833609	1
2004-04-12	0.0624014295889293	21.6239322204397	246481855	0.847826086956526	40.8903777338219	-0.0226890886887713	0.0742409343769836	0.132447813992377	-3336698.02462101	94.4012288968161	-2.05664360030237e-10	-199578.268284799	-0.0484214914803842	16.6124193217083	286.972704259939	95.9723945458223	-0.16693376068376	-0.0148134828065882	0.6	-0.379552536353318	-0.0714441481542444	101.172758254969	0.0818199675239843	0.135431309447941	-0.102088423907154	13613891.85	-15.8731487040586	-0.796899465705893	-0.00661549370345823	0.0137009115137167	-178.866146848604	0.152173913043474	0.114383210201657	0.146919855456094	0.0493099196927824	-0.692810438569669	28904728.0154311	-0.299576131532424	-1.97618723101823	0.00494943901693612	2.29137188390313	2.32531508190883	2.28365998217343	2.31725756421749	0
2004-04-13	0.0657798509361007	22.6298835814419	230415851	0.983050847457622	33.4750295409011	-0.0697805359923471	-0.136742964785624	0.150904464703414	-7177800.58122956	90.5007365662064	-2.37774424960483e-10	-805724.320023094	-0.0649900239243175	16.8070234145348	279.327427938936	91.0395749340353	-0.26431178774928	-0.024734902201561	0.5	-0.303964875915288	-0.116029728646548	101.71482646183	0.0641831888474744	0.121181685327848	-0.158193970399356	13794290.3	-11.2011777269664	-0.0021975705756283	-0.00844116237089833	0.0170966086002292	-199.096225412013	0.016949152542378	0.0819051909818973	0.125248300631362	-0.00478102831703192	-1.25575445121227	14206043.5047932	-0.0757707067891366	-5.25557612291271	-0.0480391232666577	2.24963844373219	2.30528303062678	2.23856175331031	2.28654987901141	0
2004-04-14	0.0675684269434272	24.4826632792102	213854842	0.923611111111118	29.2638733242223	-0.187874057986522	-0.176473716447774	0.179369390199871	-10199734.7326222	88.049798708443	-7.47390415798405e-10	-1494358.20089924	-0.0776527344035336	16.2489998263093	266.512723991802	87.4291280083765	-0.2559650997151	-0.034649594368075	0.4	-0.236916955541986	-0.116561839845118	102.411151430525	0.0365601504329525	0.104257378348869	-0.229818259972081	12695623.85	-7.1968756149108	0.558686505967714	-0.0109492608475359	0.0184651856389276	-226.198488173617	0.0763888888888816	0.0800664236175587	0.110187674960094	0.0198239209324878	-1.9621431512898	6987142.14581751	0.0996521047397505	-6.72648884421604	-0.0369350324334506	2.20011476139601	2.2763478454416	2.18252879351741	2.24726133263326	1
2004-04-15	0.0747227309727315	24.715521873298	228518791	0.792592592592596	34.6399829224935	-0.124198943807832	0.00258843876440943	0.190118164455732	-12340199.3877106	90.7105510578812	5.80667604568217e-10	-298284.364705814	-0.0873727023065949	24.5308708011051	244.129167228318	89.0080855213229	-0.23092503561254	-0.0390357127052093	0.4	-0.449193482866624	-0.103496650041152	102.708825467992	0.0123460669786528	0.0858751160748257	-0.298518764059463	11953363	-5.24537473080557	0.517129159163657	-0.00907128195679683	0.0205105266311214	-134.336099585063	0.207407407407404	0.122513418214174	0.114296256044787	0.138947742552946	-2.33603996745753	854945.291271742	0.320910535999331	-3.1388888621187	0.0225870983459515	2.16672800925926	2.25130778133903	2.16093945327561	2.22371577629849	0
2004-04-16	0.0745240003052508	25.1451563132979	221608180	0.81102362204723	33.9854734797824	-0.172311747251425	0.044527843413798	0.20186529045874	-11931509.4771764	91.0038657921101	-7.04563356218029e-10	308333.178919638	-0.0973423574585421	26.829068179325	228.753615378841	90.0139572541831	-0.25318287037037	-0.0395331937131909	0.3	-0.610032973608453	-0.113492714906902	102.934802152891	-0.00807923589434889	0.0670842456809908	-0.362005586338277	11588117.6	-8.61711941832285	-1.02463693542286	-0.00689319178722109	0.0190249741731888	-130.822432716885	0.18897637795277	0.144667738127039	0.124420083405538	0.185163047570042	-2.64764053289587	1415265.10208337	0.465586305969906	-2.32205916160872	-0.00526889619618387	2.13946216168091	2.22404193376068	2.14283692065478	2.20242779068297	0
2004-04-19	0.0810821123321129	26.1485038424115	212989253	0.966216216216233	28.2393206198349	-0.238628059886605	-0.112012785972984	0.213337679925996	-12726412.0371592	87.2236770189918	-8.30757716960802e-10	-518050.44181802	-0.114392429596755	26.7238744752177	204.581863031235	84.6548651594198	-0.37281873219373	-0.0487756740755521	0.3	-0.307927279893591	-0.171298073489034	103.529716307409	-0.0421286141983339	0.0452416737051258	-0.434471727353247	11259427.25	-10.2064301745902	0.218383221031008	-0.0113500059691778	0.0219550550898388	-145.636070853463	0.0337837837837675	0.107706420012615	0.118848862274564	0.0854215354887185	-3.2699335302655	-5479876.49791738	0.568624744023989	-5.67727938725344	-0.0542745891963407	2.08771269586894	2.18954228988604	2.09367217431116	2.16477595267223	1
2004-04-20	0.0836656110093615	27.2765808024503	219225398	0.891719745222928	29.206096169853	-0.213240521505161	-0.0130816170702428	0.228965128777882	-11517832.0696319	88.5034736001806	-6.95116625886197e-10	-453571.053964139	-0.12867810719373	22.323255391798	185.335822086714	86.4374076135409	-0.37560096153846	-0.0463529769627822	0.3	-0.29741388180098	-0.171812097001875	103.890453823191	-0.0714186331368363	0.0219096123367334	-0.505461583881395	10702775.75	-13.1637995975692	-0.0271213343171528	-0.0113896684235672	0.0219242352107242	-133.611111111112	0.108280254777073	0.107897698267434	0.115198474272187	0.0932961462579285	-3.70242495357681	-4143559.71220271	0.506044641020049	-3.37653185602782	0.00417436021889073	2.05877751068376	2.15420797720798	2.06367790609348	2.1354874830333	1
2004-04-21	0.0846592643467643	27.5163087677691	225327285	0.802547770700637	33.6953539324992	-0.214514647861777	0.108844573445424	0.236957226639802	-10279766.4802429	90.989919655961	5.3027111989278e-10	144863.521912843	-0.138719101559644	20.2477189079618	168.562984508826	89.4054128705247	-0.29769853988604	-0.0357736157139233	0.4	-0.423258924414462	-0.13605246906644	103.92741466198	-0.102521908891597	-0.00297669190893257	-0.563690565015296	10202802.65	-15.6858993054037	-0.377031547213003	-0.0102537587581687	0.0231355871616863	-89.2248062015505	0.197452229299363	0.13774920861141	0.122715385718595	0.167816854397041	-3.86405116020765	-5252993.71220309	0.476662626391278	-0.654030454284728	0.019253206990555	2.0532130519943	2.12666390669516	2.05666546422376	2.1186062280244	1
2004-04-22	0.0846592643467643	27.7389133069938	228944578	0.751592356687909	36.1856096174493	-0.198257136128272	0.185641068438183	0.239156660499449	-8184594.02288872	92.7168157236746	2.99591992612325e-11	159094.498419683	-0.145621170510993	16.8190749913998	163.522668369833	92.0612676432868	-0.29213408119659	-0.0303742689635365	0.5	-0.475294902206252	-0.132322379446874	103.790330719943	-0.124598078073944	-0.0273009691419349	-0.605346832026521	9910055.7	-19.7958292364525	-0.874825992342627	-0.00981110109155638	0.0235001109556926	-72.8979428799701	0.248407643312091	0.174635353511637	0.140022041649609	0.243861977235693	-3.86852097307222	-2669212.99791763	0.43080624265927	0.473821980002697	0.010837658577607	2.04264058048433	2.10468429487179	2.0594097812299	2.1088411711549	0
2004-04-23	0.0852554563492057	28.2415738434972	225161792	0.883561643835612	32.5635987354093	-0.221523448842962	0.108275347006599	0.241989611771954	-7573919.65362685	90.8021954215163	-2.29188120656893e-10	-75513.805422005	-0.154485067846445	17.552662340991	151.338685928609	88.8912758657014	-0.31439191595442	-0.0290324070570015	0.5	-0.442908422891701	-0.145749645387508	103.896379728712	-0.153322768430298	-0.0525053289996074	-0.642015591842038	9662040.85	-23.1383656651786	-0.830409705208561	-0.0107590800967363	0.0240464215971596	-79.4692068056555	0.116438356164388	0.155236354395888	0.145093479231702	0.175522104724259	-4.0607168687359	-6181799.99791754	0.267868157129639	-1.59415381419155	-0.030090865568162	2.02205208333333	2.08075712250712	2.04083631070597	2.08972266179185	0
2004-04-26	0.0838643416768407	28.8915388025186	222400669	0.895833333333334	32.2475870953627	-0.171566915115408	0.140307321843774	0.250603984874522	-6814906.57759898	91.2286724249054	-5.83127381991888e-10	-123452.437789342	-0.158997273129884	18.9089911834224	152.142944473705	93.0067579789988	-0.28656962250712	-0.016094109593305	0.4	-0.366809307642642	-0.134023135754821	103.936167495682	-0.183262149491215	-0.078656693097929	-0.672290146499877	8837419.95	-26.9431323646803	-1.41111855696791	-0.0114669368206051	0.0236213228763622	-87.2278382581646	0.104166666666666	0.138213125152814	0.142800027872072	0.129039319714296	-4.19203180433559	-6872080.74791784	0.232056752995313	-0.988041415813664	-0.00278096977293296	2.02260852920228	2.05516061253561	2.0265991774602	2.07306852527854	0
2004-04-27	0.0864478403540886	29.8674483738849	217129873	0.978102189781042	29.4751955067642	-0.213566119870264	0.0950655235119025	0.260214353628996	-7082977.83943154	89.7631361232083	-3.52468968710096e-10	-139663.147146551	-0.160780753479069	19.7765077546547	152.851034594004	94.0874046712256	-0.29491631054131	-0.0117569918636978	0.4	-0.355471039310762	-0.140970715503893	104.128718470264	-0.209828413030243	-0.104891037084392	-0.70268854626574	8754557.6	-27.5237795607646	-0.596536446590981	-0.012076796283436	0.0238708729644525	-101.931423611111	0.0218978102189577	0.0994413535081949	0.128347136417447	0.0416297876896916	-4.44397426023497	-11088717.5479187	0.0394901780111663	-3.09108722074483	-0.0253830022201058	2.01147961182336	2.03512856125356	2.00041437922798	2.05033693573036	1
2004-04-28	0.0924097603785079	31.3067862406484	223904386	0.790123456790117	31.5865552435454	-0.21258310985451	0.1676628691059	0.268190836440598	-5392194.79284577	91.3639638755296	-9.08966666794882e-10	-75436.3231169779	-0.165203784745049	20.834160760704	158.522405280479	92.7743201250079	-0.28935185185185	-0.0143579211273625	0.5	-0.466762221271163	-0.137387364635773	104.128303824328	-0.229000676787943	-0.129712965025102	-0.7264943896367	8772903.65	-26.2311851424286	-0.526434048524559	-0.0104359355064378	0.024480445386839	-115.437420178799	0.209876543209883	0.136253083408758	0.130982452081217	0.146794346063839	-4.53403148277492	-7150047.1990811	0.0551014886372181	-1.9439745210033	0.00853278988505679	1.99589912749288	2.02455608974359	1.98852230576262	2.03477352174882	1
2004-04-29	0.0900249923687407	32.1294268163381	223904386	0.765517241379308	31.5865552435454	-0.26042853804455	0.194754394271825	0.265392708916724	-5152112.31361685	92.229069255329	6.13684488042634e-10	56544.7465945653	-0.162849590684125	26.8932541813277	163.131662321842	93.2644284184445	-0.18362713675214	-0.0168972662881654	0.5	-0.539386858212644	-0.0893482413691149	104.058532605425	-0.246484133383917	-0.153067198696865	-0.742515784411213	8598654	-26.4225813243424	-0.767004090181029	-0.00913118339689654	0.024517742298695	-79.6619718309845	0.234482758620692	0.168996308479402	0.143653737547279	0.21968145034365	-4.55804737083213	-10593573.1081717	-0.140800604653174	-1.30443564620382	0	1.97586707621083	2.00925382834758	1.98059425678572	2.02203981940029	1
2004-04-30	0.0924097603785086	32.4993394682564	228675854	0.703448275862077	34.9732274946717	-0.314781202413908	0.259923215208079	0.254378123043919	-4777734.44499315	94.2663123755618	1.81698717079772e-10	59738.9322916583	-0.152986944353129	32.1418209746595	170.723422510149	99.7211276669063	-0.0806846509971499	-0.0124088015132786	0.6	-0.62359308647506	-0.0397490061108526	103.821229030831	-0.260054497000452	-0.174464658357582	-0.746311842550995	8403431.15	-27.1202085204156	-0.4951436033707	-0.00857525298894092	0.0249463659646662	-57.6182136602475	0.296551724137923	0.211514780365576	0.166274085153378	0.301996170789972	-4.43119185198937	-11275211.3938861	-0.16101798743804	0.586022983172589	0.0126642028248116	1.9730848468661	1.99756846509971	1.9836555788353	2.01617407458833	0
2004-05-10	0.0900249923687407	33.2315526082288	225084930	0.867187499999999	30.3058427896937	-0.316432606102151	0.147155351461486	0.24500713290174	-5107982.71818832	91.7584690664216	-9.43099897246335e-10	-70141.131365744	-0.150632750292204	36.8015352460661	173.307576488654	95.6954849892064	-0.20032051282051	-0.0167762800369914	0.6	-0.717832056515772	-0.0993681926119427	103.91616144471	-0.271510898283125	-0.193873906342691	-0.751765675827143	8149042.9	-28.9386556068702	-1.49829593572576	-0.00782177333492609	0.0238341623947233	-108.123249299719	0.132812500000001	0.185280686910384	0.17260961907238	0.210622822586393	-4.567546202015	-14455744.0796003	-0.195183757916876	-2.36125039549982	-0.0370320881551386	1.95694791666667	1.98977822293447	1.9615838058807	1.99822247193072	1
2004-05-11	0.0858516483516464	34.0275378479966	227528037	0.796875000000011	33.6087949403178	-0.383027779606176	0.219275105339592	0.23294267467333	-4274748.41962673	93.8880405868745	-7.69927158647499e-10	-99292.2857126945	-0.149544827279201	43.4780374861232	178.260703611329	95.0965305709088	-0.16415153133904	-0.0142252762082051	0.6	-1.55639233915387	-0.0811247209933411	103.804010191647	-0.281872020286769	-0.211473529131507	-0.751389274117853	7705093.55	-31.8200894980217	-1.91378048712791	-0.00429889009520146	0.0229352469207941	-114.543776371312	0.203124999999989	0.191228791273586	0.178816009806115	0.216054354208527	-4.52902826676346	-12555549.7462671	-0.218509642356835	-0.616838121345978	0.0129745754224178	1.95583502492877	1.98365731837607	1.95521597861183	1.98808753595679	1
2004-05-12	0.0792935363247835	33.7443216323301	230525978	0.568627450980392	39.7580128020166	-0.341328550890238	0.342793893203684	0.210411534618306	-2863768.55052056	97.0722743557388	9.20496849390655e-10	105656.412760416	-0.136079550642851	33.1314881234604	184.13704199828	96.4967786100762	-0.00278222934472994	-0.00879464998405191	0.6	-1.61813235646437	-0.0013953346923018	103.420844860653	-0.288439885918885	-0.226866800488982	-0.736625303083682	7376450.1	-33.4476847456757	-1.58746631292605	-0.00408907448010844	0.0232143938025902	-43.5986159169533	0.431372549019608	0.27127671052226	0.209636243378164	0.394557644810453	-4.25149523108908	-10078989.7897456	-0.186437144950153	1.55989858549086	0.0254547971046987	1.96139948361823	1.97864930555555	1.96766413650095	1.98890079346995	0
2004-05-13	0.0745240003052478	33.3724227237442	227794612	0.533333333333341	39.3222105931376	-0.291383473911573	0.346815009911006	0.186040365685983	-1973835.07055849	97.5082740592919	2.57897627607289e-10	67469.3481793113	-0.123131483307765	39.6322210505361	195.234425286572	99.1668680624268	-0.0166933760683801	-0.00254750369773081	0.5	-1.7002590484232	-0.00836621879096366	103.103882494712	-0.295572619327273	-0.24060796425664	-0.712284478489256	6939594.9	-35.0783122009601	-0.928256206090751	-0.00391318714727233	0.0232142086001361	-11.9510439164858	0.466666666666659	0.336406695903726	0.251893060886685	0.50543396593781	-4.0082379489331	-9868884.71282318	-0.176506973242122	1.08515025734034	-0.00279652387977114	1.9658510505698	1.97085906339031	1.97410808886388	1.988554466219	0
2004-05-14	0.06915827228327	33.4686150220424	224857717	0.706666666666644	35.1704922051665	-0.271595216189116	0.204151899986028	0.16356714562675	-2097952.52619576	95.5078536421792	-6.0621303421974e-10	-89310.4411502753	-0.115605196234202	43.5897460418615	200.64354481073	96.6581916922737	-0.11128917378917	-0.00484072555027023	0.5	-3.45258315056994	-0.0560234044314899	103.073406790026	-0.307293104340669	-0.253944992273446	-0.690484014227832	6503835.4	-36.0096534642995	-1.07660769815802	-0.00214007040430546	0.0199024609943804	-81.3833701250894	0.293333333333355	0.322048908380269	0.275278343384546	0.415590038371716	-3.99432249504332	-12295015.3649969	-0.176866761020693	-1.46674592873307	-0.0284039786499712	1.95416568732194	1.96362526709402	1.95985586147431	1.97815390994194	0
2004-05-17	0.067568426943425	33.8047580870832	221992764	0.813333333333336	33.6404735094896	-0.345329638456839	0.128226578728955	0.139500510065935	-2498902.30443343	95.2194212647203	-5.67397799056926e-10	-113594.979745367	-0.110504442435531	46.3168492441686	206.9176085725	98.0004971563871	-0.15580484330484	-0.00113996805991938	0.5	-2.10486434149304	-0.07845247186723	103.102659807755	-0.316827907732391	-0.266521575365235	-0.673076383345339	6255647.6	-36.7412485673214	-0.777810257864296	-0.00326203985403193	0.0199612412270676	-117.80848205719	0.186666666666664	0.276921494475734	0.275826060414942	0.279112362597318	-4.03001306690931	-14300482.4649968	-0.130547471941056	-1.92946987795082	-0.0115914088581331	1.9524963497151	1.95472213319088	1.94293509829531	1.96559748485019	1
2004-05-18	0.0665747736060222	33.873019066051	224227665	0.533333333333317	40.9076177599219	-0.236081851675469	0.356147722489217	0.117893082260613	-1824511.00502211	98.5781476165139	2.28597512086926e-10	33405.2497885485	-0.0991793422182032	42.0775912098244	217.130292769494	100.14160814927	-0.0361689814814801	0.000426394351600451	0.6	-3.03344134093494	-0.0182161023131299	102.798200733802	-0.32241900008083	-0.277701060308354	-0.647184746754426	5564092.45	-38.2512542851873	-1.00440113582204	-0.00246455879016645	0.0211269631432828	-58.8588588588561	0.466666666666683	0.34016988520605	0.297274002011978	0.425961651594195	-3.78000272940769	-12065581.4649968	-0.157655202834494	0.640410729955139	0.0301455039859382	1.95750436253561	1.95666969373219	1.95113019492242	1.96594710363682	0
2004-05-19	0.067568426943425	33.3926417454125	221062100	0.573333333333327	40.2298275113801	-0.203151469623052	0.338991367758139	0.112582172761148	-1605653.26655047	98.4343854754989	4.8784012499227e-10	52078.0832665621	-0.0871230150577089	41.3838519314383	227.296487631256	99.7167837014593	-0.03895121082621	-0.00270974090586976	0.5	-1.83108874793069	-0.0196863934825636	102.563141045688	-0.325225814341543	-0.287206011114992	-0.61683800600445	4894320.25	-37.7236657446544	-0.133394401375854	-0.00354590420844799	0.0207749863106599	-7.61374187557676	0.426666666666673	0.369002145692925	0.32118338323896	0.464639670600853	-3.57506683164435	-12898624.8860497	-0.261237289045388	0.0710556260277464	-0.00425126094236672	1.95082701210826	1.95611324786325	1.9538113633291	1.96471557572875	0
2004-05-20	0.0665747736060215	33.1494001991064	219035011	0.61016949152539	38.1857453991466	-0.176840647566373	0.220925071585994	0.0932121761158629	-1733942.99350597	97.6266513226448	-3.513183741089e-10	-38590.2110042714	-0.0735150599934231	42.9543427800067	233.714977652126	97.203477942757	-0.0139111467236401	-0.00659617319169219	0.4	-2.94313306325046	-0.00716670114788065	102.460763531648	-0.327174666887262	-0.295199742269446	-0.587815857691942	4262477.25	-39.1628398514562	-0.623860001432057	-0.00234149625017827	0.0196012917984992	-41.9109663409309	0.38983050847461	0.37594493328682	0.339437233254914	0.448960333350632	-3.47541242541048	-14220639.4512669	-0.218540154282851	-0.714108158432887	-0.0128633098854228	1.94025454059829	1.95305279558405	1.94725212089936	1.95915522305805	1
2004-05-21	0.0655811202686186	32.923533048965	220414125	0.525423728813565	40.0094120807879	-0.185131057817051	0.307216301212126	0.0777172074815216	-1418323.06149366	98.7239575384505	-3.70450019621546e-10	-15786.6906494829	-0.0619581073307018	44.2397846185651	248.92311941584	101.596113497297	-0.0166933760683798	-0.0027198262023041	0.4	-4.72033408858645	-0.00853278988505679	102.277853670264	-0.32469325486065	-0.301098444787687	-0.556939668214174	3985902.4	-41.5488316982515	-0.694196217037419	-0.00162938554531515	0.0197646637835654	-54.9305555555575	0.474576271186435	0.408822045920025	0.362565504143284	0.501335129473506	-3.30264682463642	-13343021.451267	-0.287715868579645	0.334364746036309	0.00716670114788065	1.94359321581197	1.94887945156695	1.94751634152075	1.9571351430045	0
2004-05-24	0.0633950829263322	32.0632984495522	218275653	0.627118644067767	38.5400297863845	-0.13349038706884	0.214360615198811	0.0746128575557505	-1672220.37874258	98.0369284767237	4.12655023980198e-10	-8256.63005252543	-0.0527553487289045	52.0103370144508	256.506160000797	99.4270769571777	-0.0333867521367499	-0.00114257305349268	0.4	-28.2654961426157	-0.0171390153329529	102.180200031258	-0.324542897101261	-0.305787335250402	-0.527816895665056	3661879.65	-41.8821468200074	-0.902089839481174	-0.000451223801975534	0.0187245498659304	-29.7223734349352	0.372881355932233	0.396841815924094	0.373990941403554	0.442543564965175	-3.19794195414925	-15256391.1354775	-0.323941546544624	-0.525430315199668	-0.00860622544789613	1.94804478276353	1.95027056623932	1.94212802991222	1.95244719094826	0
2004-05-25	0.0584268162393157	31.6976038563174	215517269	0.959183673469378	36.1566448553361	-0.190055520790997	0.0709049916993268	0.0778668074967629	-2193077.81794298	96.8709030067603	-5.80900130736605e-10	-56221.4431980072	-0.0464596630962797	57.0529463258783	257.87604209606	95.5318124009989	-0.08624910968661	-0.00575064583203112	0.3	-3.36851072707628	-0.0443135954530429	102.19950583102	-0.318411611350102	-0.308312190470342	-0.504660456652151	3487991.6	-40.5927403682248	-0.89852248125694	-0.00209228858954022	0.0188793043525734	-130.628803245447	0.0408163265306219	0.278166652792937	0.342049511866682	0.150400934645447	-3.19373834246991	-17401800.9132552	-0.285562845804288	-1.91156877907814	-0.0145103772952784	1.93524652777778	1.9463754451567	1.92926172435743	1.94355299500273	0
2004-05-26	0.0592217389092379	32.0090980750765	211111946	0.926470588235328	32.6748700503748	-0.218322975632802	-0.144807701947786	0.0804337048925697	-2964604.87859538	95.0496038795446	-6.85287332938357e-10	-136425.235933058	-0.0401996470706385	45.2270402759055	252.962488168449	93.5589930593501	-0.05842681623932	-0.00929727089304855	0.2	-1.80202384716959	-0.0309451581949743	102.385496159582	-0.310183751261589	-0.308686502628591	-0.492790480189997	3403163.4	-35.6408049957274	-0.205667461308435	-0.00376270731734494	0.0196968176848258	-231.412015858484	0.073529411764672	0.209954239116849	0.298017754283404	0.0338272087837379	-3.33835028888865	-20112768.9132559	-0.220610825069302	-3.30435447581984	-0.02366365089707	1.91521447649573	1.93302074430199	1.90584563081569	1.928182167499	1
2004-05-27	0.0620039682539679	31.0417042304153	217392703	0.33898305084748	44.832283366498	-0.191659756719313	0.494092496836819	0.0682768895151279	-1871124.57279891	100.171190360531	6.7292475559293e-10	199013.657963861	-0.0347778668091141	46.9833621078562	254.196172806176	101.152448729976	0.01112891737892	-0.00550905040718646	0.3	-9.24965127751545	0.00571288080502719	102.039242890592	-0.298950503575238	-0.306739302817921	-0.470051400009885	3536336.6	-27.5187168184024	0.274836500250597	-0.00103840645732766	0.0242637829076327	-40.3690888119972	0.66101694915252	0.360308475795406	0.318781328120738	0.443362771144742	-3.02806207372284	-16224681.2465897	0.0180562882914592	1.66504012034356	0.0496326144224193	1.91910959757835	1.92968206908832	1.92176683436145	1.93280527185427	1
2004-05-28	0.0576318935693929	30.143409946087	220585734	0.228070175438591	46.3661195258376	-0.0976638934505565	0.645221324369801	0.0590894636705764	-457778.536822839	100.978118632305	3.62429810088808e-10	319275.970719832	-0.0310860624863001	55.1690478361107	263.235077128496	103.060448010415	-0.0250400641025599	-0.00535321025247862	0.4	4.26039536468971	-0.0126464074019373	101.684023376611	-0.286655193087641	-0.302722480871865	-0.437868839609701	3506848.85	-26.9756268509194	-0.117438928575442	0.0020669884290742	0.0220799620100913	46.5317919075162	0.771929824561409	0.49751559205074	0.378359416097405	0.73582794395741	-2.69334167250991	-13031650.2465897	-0.0606998306409386	2.09333669160395	0.00709550889773414	1.92300471866097	1.93329896723647	1.93701801896652	1.93911711118561	1
2004-05-31	0.0669722349409843	29.3538964588702	235419647	0.256880733944981	56.0942936286985	-0.135071629206046	1.23089662578737	0.0809081109422894	-1287244.75462968	106.064501369543	1.10680419041654e-09	785729.300213638	-0.0227393744521114	70.5853042253632	257.849027842769	105.232092453709	0.0834668803418799	0.000713089712069193	0.5	2.41963582867687	0.0411482456186459	100.925789980836	-0.258826317288	-0.293943248155092	-0.381744992431587	4110488.35	-5.91538545120156	1.80364538846748	0.00487140372226417	0.0257687143452176	304.979573810301	0.743119266055019	0.5793834833855	0.44536743852677	0.847415573102959	-1.98102972933603	-17976287.9132572	0.120373131348063	6.30945727779912	0.0509981291408121	1.95082701210826	1.9494358974359	1.98149963728822	1.96299815895761	1
2004-06-01	0.0659785816035815	28.6207767921689	245187157	0.229357798165158	56.7788242891266	-0.154535664971471	1.09850401161762	0.100519168463227	-3236590.18797505	106.136589853381	2.85301785777599e-11	804283.118266972	-0.0136614594747579	74.1015568629332	252.331866152423	106.106444865744	0.14745815527065	0.0127491326218674	0.5	3.03518736067043	0.0735754352876982	100.323352674726	-0.233138124242178	-0.281782223372509	-0.311454485329354	4335324.05	0.737339395627709	1.18113585204976	0.00331781644154061	0.0250569006576151	215.410146989087	0.770642201834842	0.643136389535281	0.511290422196274	0.906828324213294	-1.36898720484284	-24487961.2465899	0.0679808513143065	5.40789101700529	0.00402321101908099	1.98588310185185	1.96056481481481	2.01393627884742	1.98405477768637	1
2004-06-02	0.07134430962556	28.6308046287059	261379363	0.0813008130081485	62.8142739086652	-0.0961445041651042	1.25225673476884	0.127267622517398	-1376169.13141656	109.710603547114	2.48589726802547e-10	693994.424412397	0.00121276663744907	79.1342980466142	251.802355351144	111.651758323406	0.25040064102564	0.0319565261568751	0.6	2.04286230010438	0.123245473862498	99.5344600088654	-0.2062156814175	-0.266668914981507	-0.221060460851452	4806208.7	12.6841757958825	1.77972816500038	0.00628963990450768	0.026690458660967	197.937458416497	0.918699186991851	0.734990655354138	0.585857166582228	1.03325763289796	-0.554640835027231	-16391858.2465913	0.228444355753678	7.18059424300181	0.0380786297166669	2.045979255698	1.98059686609687	2.06245559021926	2.01595285682757	0
2004-06-03	0.0725366936304443	28.6401161912045	254501241	0.268292682926833	56.1208020315047	-0.0960632091056302	0.925520489112554	0.140480960276399	-1484951.60175246	106.107147274334	-1.82881318561144e-10	433161.347044171	0.00984481152750671	74.7752935094918	243.663180567299	107.569546479392	0.12798254985755	0.03742083039886	0.6	2.14077205825968	0.0630195267160101	99.242583788697	-0.187998742632152	-0.250934880511636	-0.134877610575457	4879552.05	10.8967724995148	0.850992748755894	0.00617334340345853	0.0268544234910747	118.660157309465	0.731707317073167	0.733896209260481	0.635203514141646	0.93128159949815	-0.168551922932336	-19968481.6865908	0.202092324007912	2.00900926072218	-0.0300804431605499	2.07435799501424	1.9967337962963	2.07347137282424	2.03041650795605	0
2004-06-04	0.0717417709605215	28.3906030779284	249962445	0.333333333333352	53.9667022638132	-0.118428625203287	0.812908180949939	0.147537232944037	-2131492.05152867	104.758731283608	-2.59232100154887e-10	-270581.783631582	0.0190297353258115	72.9675118043671	239.810419289849	107.346860653598	0.1140714031339	0.0411591451966751	0.5	2.14077205825968	0.0565922596956769	99.13540681269	-0.168186859843661	-0.234385276378041	-0.0603341092620391	4867918.45	6.78237302235086	0.460109833498521	0.00623782714705117	0.0268097045443394	77.1754517445208	0.666666666666648	0.711486361729203	0.660631130004165	0.81319682517928	0.0468925880758642	-22805229.1865904	0.226878525773811	-0.0447122780644474	-0.0106785279626999	2.09550293803419	2.00925382834758	2.07339594964161	2.03820352528701	0
2004-06-07	0.0727354242979243	27.1095415375738	245885441	0.512195121951222	48.4582789498655	-0.117742890228765	0.588621474276792	0.147802392987465	-3092636.36028251	101.423514400177	-8.4584819059104e-10	-175286.647524928	0.0252005773339932	68.6475300275325	234.53717927429	105.700303908634	0.0779024216524202	0.0319103179393474	0.5	5.76700091455432	0.0394876804886147	99.3273346457399	-0.154179320876945	-0.218344085277822	-0.0086145403994542	4892222.45	2.78815796895604	0.601165473167747	0.0019429854207266	0.0274152803597441	26.9611513185254	0.487804878048778	0.636925867169062	0.652729375725797	0.60531885005559	-0.0257812904815635	-25976232.2977013	0.260215528707807	-3.34146848140842	-0.029967889092485	2.08381757478632	2.01732229344729	2.05294265232518	2.03344580390616	0
2004-06-08	0.0745240003052507	25.2029290805691	241854017	0.682926829268306	43.8565868737418	-0.172620639903462	0.379536975664422	0.145384057232175	-4260282.73116535	98.4506972204617	-9.94619882606429e-10	-242546.396456548	0.0273764233599996	64.2525906238649	229.615035304867	105.088494547457	0.00556445868945987	0.0177033235630445	0.5	70.8801686070063	0.00285236078217477	99.7293945354787	-0.141891337833375	-0.203053535788933	0.0152833722847134	4971638.3	-0.600098992189719	0.241788108749027	0.000171812881754679	0.0286201313686018	-21.4369846878714	0.317073170731694	0.530308301689939	0.611922351047178	0.367080202975461	-0.313179577588596	-29719697.4405584	0.309191368891411	-5.26192196087242	-0.0294686185585593	2.05877751068376	2.02233030626781	2.01983151536778	2.01893006527831	0
2004-06-09	0.0733316163003672	23.878851981008	237966228	0.764227642276426	41.8200176829887	-0.220850862471378	0.292492824607586	0.147252512438712	-5011389.23938147	97.212172811332	-5.92338740010101e-10	-171855.237824965	0.0277687890368203	62.9196193702922	223.217908112802	98.5758516669077	-0.00556445868946009	-0.00843503720421137	0.5	190.158858373947	-0.00288528024562451	100.155910568024	-0.133972866525132	-0.189237401936172	0.0156499343232808	5016130.7	-3.5932821598046	0.651239841820157	6.7487723427779e-05	0.0286735902511393	-57.2106973256688	0.235772357723574	0.432129653701151	0.551991451931835	0.192406057239781	-0.646770629226057	-32235325.6170287	0.160781395385088	-5.44165733148426	-0.0143438664756954	2.01203605769231	2.02900765669516	1.98848332624709	2.00199495304692	0
2004-06-10	0.0737290776353286	22.7962169506746	234794980	0.780487804878056	41.4058835042225	-0.229234767722936	0.288012566954285	0.150104636765613	-5045497.98440552	97.094921020455	-1.90392681329439e-10	-62906.7424545882	0.0308720448444035	61.6959077693428	212.584280195508	97.5960656293767	0.0166933760683801	-0.0246279751550965	0.4	-16.8598261564625	0.00873146786710222	100.498403916861	-0.12709154367825	-0.176808230284588	0.000671309652156005	5038124.8	-7.07929632607258	0.832683937270277	-0.000652647282452116	0.0286074092851355	-66.4778790117403	0.219512195121944	0.361257167508082	0.488413357123918	0.106944788276411	-0.925142178825744	-32967152.0785664	-0.102231519482295	-3.83182310641371	-0.00289362918255165	1.97697996794872	2.02566898148148	1.96572971393681	1.98712723236862	1
2004-06-11	0.0765113069800579	21.2562133580033	234794980	0.780487804878056	41.4058835042225	-0.222462977707381	0.291182656324363	0.150865280515649	-5151459.33626132	97.1222476839119	4.79957362271239e-10	-8823.13924501502	0.0376849397782926	62.3485790219933	207.728603184991	92.7436330055952	0.0612090455840502	-0.0383090254371471	0.4	-266.167192428413	0.0323951187641722	100.747017028813	-0.122665712135172	-0.165979726654705	-0.0226492392548017	5077559.6	-9.11199638812798	0.55513394165542	-4.05545752238786e-05	0.0285165237454182	-54.0476771621533	0.219512195121944	0.314008843379369	0.430278519209068	0.0814694917199718	-1.13459515040826	-34886395.9270509	0.0694719372410393	-2.40393437062307	0	1.9463754451567	2.02093919159544	1.95056063906328	1.97496273363182	0
2004-06-14	0.0784986136548643	20.4015010778887	231128184	0.927419354838722	37.3326555316117	-0.211157552309557	0.135417268480095	0.156393839219832	-5012108.05704097	94.5483286635096	-1.26663170680979e-09	-96917.7406071974	0.0352059020929245	61.8012875514173	203.532822631858	89.8283405046745	-0.08624910968661	-0.0433852668810886	0.3	-11.4823257238125	-0.0451528155917672	101.159071776577	-0.117082205679014	-0.156200222459567	-0.0591032027519423	5117651.75	-10.8143711415521	0.284673255229089	-0.000977960194941388	0.029231793935307	-101.432506887053	0.0725806451612778	0.233532777306672	0.364696605241603	-0.0287948785631892	-1.50156734860739	-35913098.8070512	-0.0691981654084469	-3.40605640503087	-0.0279153199335201	1.91744025997151	2.00062891737892	1.92282713663098	1.95539862420174	1
2004-06-15	0.0866465710215715	19.7668767388881	236423466	0.596774193548381	48.9932185644577	-0.201486624547911	0.503147303852503	0.156227223705515	-3711848.33007184	100.288681957156	2.05679428937467e-09	205102.383257671	0.033903961438019	66.7564299531481	197.77058196339	91.7544267081708	0.0139111467236499	-0.0353022513947166	0.3	3.13063093349096	0.00704551715977464	100.931162887438	-0.105079635178611	-0.145976105003376	-0.0802195628792246	5270670.8	-9.51048530759959	0.184002652959476	0.00505581471044247	0.0327563551990024	-44.606121424987	0.403225806451619	0.290097120354988	0.339830110279398	0.190631140506168	-1.31108182617597	-33304974.8369015	0.30156529534544	2.76572330727462	0.059293841649276	1.92300471866097	1.99089111467237	1.94236193605409	1.96013188069239	0
2004-06-16	0.082075765669515	19.1775827098161	233106368	0.669354838709688	46.9289672849934	-0.198267535435853	0.423022199178568	0.156359602957451	-2982621.54679407	99.028270358643	3.9904664307806e-10	260489.950587616	0.0238629670721047	65.7007406616616	195.666440670341	93.3614281940844	-0.1140714031339	-0.0214891227079787	0.2	25.0313435954579	-0.0566705028428995	100.859300437985	-0.0997788156634476	-0.13673664713539	-0.0949855000913491	5278247.45	-11.5603522321679	-0.638400210319004	0.000518507159216705	0.0302212908304006	-40.0685518423316	0.330645161290312	0.303613134000096	0.327757784852964	0.25532383229436	-1.24839767965769	-33828727.1526912	0.082432504102435	1.4426391220002	-0.012717890861862	1.92912562321937	1.97058084045584	1.9470384476353	1.95945180616608	0
2004-06-17	0.0848579950142443	17.907001128259	230192647	0.838709677419376	42.4361006159449	-0.199403535306006	0.243949187971766	0.158817027598199	-2867697.02199084	96.1588558948877	-1.0759520390945e-09	-126649.893997076	0.0124308580338257	62.4099639263954	191.665303741458	91.5455992906505	-0.18084490740741	-0.0135882518680436	0.2	-5.13880376123009	-0.0910133263464821	101.055168815765	-0.0989520866917473	-0.129179735046661	-0.115303067387451	5322579.05	-13.8780995125705	-0.0915396639150305	-0.0021233017739078	0.031200441296343	-77.2761101463671	0.161290322580624	0.256172196860272	0.303895922188733	0.160724746203349	-1.42295892689942	-35447461.0415805	0.08202284469079	-1.34970841747745	-0.0303196124845015	1.92467405626781	1.95082701210826	1.93068051660966	1.9482723240556	1
2004-06-18	0.0759151149776143	16.7271753739559	232893155	0.758064516129034	45.1300089350858	-0.19257318998862	0.338075808317175	0.160482132404248	-2195803.76840422	97.6234938649079	-1.43321184878356e-10	-47552.5577034321	-0.00469055331835477	55.9863078475683	194.186031617132	95.7133417486795	-0.23370726495726	-0.0053454763447016	0.3	-1.71467197292241	-0.11453934524999	101.056817872468	-0.0917684229992635	-0.121697472637182	-0.132229957359598	5388648.75	-16.119043115123	-1.70347607493143	-0.00481343812776604	0.0275558659243913	-65.6978504389925	0.241935483870966	0.251426625863837	0.286406156747101	0.181467564097307	-1.43117878507134	-34097207.0415808	0.101575474364346	0.0481806471155338	0.0145526108131594	1.9257869480057	1.9360811965812	1.92904932707501	1.9441840738647	0
2004-06-21	0.0771074989824986	15.7772701353594	230976704	0.774193548387102	44.679651782322	-0.160331198978517	0.330825109022528	0.163634902027719	-1279358.12019327	97.3688815930242	-6.78574313291344e-10	32235.1568064547	-0.0188692220943794	47.7462203270134	204.470199609659	98.2910220002891	-0.17528044871795	0.00488523962893491	0.3	-1.49796576249464	-0.0873525312719913	101.065263462222	-0.0838532429701724	-0.11412862670378	-0.146589513398876	5377547.7	-19.4338557849043	-1.62858653367902	-0.00530777824703066	0.0274468515555943	-73.4395750332018	0.225806451612898	0.24288656778019	0.271899627091464	0.184860449157642	-1.44452342343786	-32500164.5415808	0.0603998043431042	-0.240903235576169	-0.00289362918255165	1.93635941951567	1.92689983974359	1.92610704782209	1.93982742212862	1
2004-06-22	0.0725366936304429	14.6882234663423	233450516	0.718181818181819	45.557273684039	-0.133972747058991	0.355052802100867	0.163093298882192	-597040.789578654	97.7300734398225	5.58543989038385e-10	4992.06229968195	-0.0316746110015309	32.7039608545715	217.107649124279	100.144472333641	-0.14467592592592	0.000722361668202255	0.4	-0.680051421962424	-0.0723366933990264	101.015129779054	-0.08039924049756	-0.107382749462536	-0.156442657567879	5363319.1	-21.0182993328994	-1.87876973457237	-0.00776964835984579	0.0245811194031065	-45.8287529009437	0.281818181818181	0.255863772459521	0.26655434221415	0.234482632950262	-1.40471594626888	-31772572.7768743	-0.0289073902729551	-0.335486494601742	0.00433730991026504	1.9257869480057	1.92439583333333	1.92692775766487	1.93778046853259	0
2004-06-23	0.0703506562881557	13.7185622937076	231719354	0.73958333333334	44.0520422680159	-0.118834929386875	0.290231347104029	0.158285033109034	-467697.94390022	96.7545452642854	4.02430281741928e-11	-4125.4006410255	-0.0378811226166966	36.6451073807694	225.963503748109	99.5653270347249	-0.10016025641026	-0.00319315365562238	0.4	-0.865304741100894	-0.0510623183642406	101.036712697597	-0.0778529834485477	-0.101476796259738	-0.165450559549118	5229611.05	-23.850666868863	-1.37955279023052	-0.00627131305373813	0.0237719586882862	-45.8363798846424	0.26041666666666	0.2573814038619	0.263496696096733	0.245150819392234	-1.4263351369208	-32541978.1102074	-0.0177163419379744	-0.602693661500166	-0.00869351405769925	1.91688381410256	1.92300471866097	1.9219104388706	1.93307052903249	0
2004-06-24	0.07154304029304	13.0875234870853	228960172	0.858823529411772	40.8989647495531	-0.183780455989885	0.18677525227171	0.161553886754958	-989694.474514183	95.1116218336882	-4.93762579740763e-10	-64347.8704816599	-0.0411627264591978	38.3971378266431	233.017122781271	97.6817441852	-0.07790242165242	-0.00320058635673098	0.4	-0.801118480082511	-0.0406929958894661	101.201385855861	-0.0763586628939916	-0.096453169586589	-0.179454699824333	5053532.3	-23.7778026912593	-0.497727519654921	-0.00686390914652206	0.0239911459526168	-94.9046015712671	0.141176470588228	0.21864642610401	0.248546606099159	0.158846066113712	-1.57674717862691	-34799490.6556619	0.057917965964305	-1.79653324475235	-0.0190992960837848	1.912432247151	1.9185531517094	1.90650923251392	1.92264076371759	0
2004-06-25	0.0709468482905986	12.6708132838542	225856328	0.895522388059727	39.7213481566764	-0.243738117731152	0.16510633863619	0.16689871164306	-1900637.41733572	94.6599638098603	-1.79563666576234e-10	-71487.4159766756	-0.0437131033585334	39.4861413402147	236.040632955721	99.7020147000677	-0.0639912749287799	-0.00688368284320016	0.3	-1.07130613644162	-0.0337932507169939	101.368841124183	-0.077119466493424	-0.092586428967956	-0.197571145290276	5049072.95	-22.7336644433428	-0.272721061624148	-0.00528485046028447	0.0230958292673279	-119.519519519528	0.104477611940273	0.180590154716097	0.225894455638138	0.0899815528720157	-1.73585043930726	-37644680.9889951	-0.0242145573179486	-2.21624497002989	-0.00744412130322325	1.89963399216524	1.91271047008547	1.89160471270159	1.91157801996474	0
2004-06-28	0.0757163843101343	13.8972473907671	219856375	0.972477064220209	30.9049348031219	-0.271044185436957	-0.129798296126393	0.180844973903148	-3680125.64705265	88.9138426195514	-2.28097363828634e-09	-405533.656628387	-0.0510075379867023	38.2909919565275	231.554815659089	87.5030548712156	-0.18640936609687	-0.0198693093043251	0.3	-0.716125664670778	-0.102117958704312	102.078764060886	-0.0863824524151446	-0.0913456336573937	-0.240026110656932	4607374.95	-15.2396439780723	0.397631972442884	-0.00812076515708731	0.0281265402843392	-290.527200168039	0.0275229357797909	0.129567748403995	0.193785553226757	0.00113213875847118	-2.37895304879741	-42952331.719765	0.182265090324857	-7.38163811791205	-0.0712183371698701	1.86235211894587	1.89935576923077	1.83900751620752	1.8792571296474	1
2004-06-29	0.0769087683150186	15.036079061472	223433130	0.798165137614692	37.1136898941899	-0.184053993423883	0.0800301037853983	0.188999499822145	-3346053.13420208	92.3162518383781	-6.22206451495532e-10	-289406.791143603	-0.0565719966761615	38.8126500661365	228.886095910232	91.32504958431	-0.13354700854701	-0.0250313252623689	0.3	-1.57308058310013	-0.0720844395095547	102.328177674357	-0.0887263893431052	-0.090821784794536	-0.284135276616104	4297837.2	-14.426028625242	-0.0833846507977896	-0.00492572530926333	0.0298646563739208	-206.262721152346	0.201834862385308	0.153656786397766	0.180409297617094	0.100151763959111	-2.64153836444007	-40308643.2415043	-0.136419018082855	-3.40933793112083	0.0300335191947577	1.83397337962963	1.87988016381766	1.82156350439475	1.86242410257864	1
2004-07-01	0.0812808429995936	15.2501880383763	227083816	0.651376146788998	41.8522004041526	-0.287413704672465	0.223322998131294	0.174307265524536	-2092573.71476554	95.4257068328289	8.16341928275795e-10	175794.216579867	-0.0568038491215552	46.0840622375443	231.246862221163	96.4818362600627	-0.0361689814814798	-0.0272432002074261	0.4	-3.13316735760654	-0.0195590823411651	102.258528217709	-0.0840414588895806	-0.089465719613545	-0.317345585146511	3670761.2	-13.4749197710851	0.140789893875377	-0.00293966742155586	0.0309165033189468	-115.862068965518	0.348623853211002	0.218645808668845	0.193154801301011	0.269627823404513	-2.63141705584711	-37492399.7557902	-0.022579094598286	-0.126452807197038	0.0246100372348694	1.8178364494302	1.86736013176638	1.82477271969147	1.85674538397978	0
2004-07-02	0.0777036909849415	15.4490035169303	224348186	0.715596330275253	40.4173190930265	-0.271398930859745	0.176004006470006	0.158072555047271	-1717234.50859555	95.1141067717795	4.24443370997183e-10	54617.3405226099	-0.0691276983344278	44.6771938567325	231.51382422777	94.0766343207363	-0.1697159900285	-0.0297484155839737	0.4	-2.51371528248516	-0.0895453696629447	102.26338485533	-0.0884916310197053	-0.089270901894777	-0.344416739288844	3463636.6	-14.5691951812003	-0.308863740267594	-0.00369934489823467	0.0309693356124332	-81.1632769435483	0.284403669724747	0.240565095687479	0.208958232763167	0.303778821536103	-2.67801098259516	-38769027.0891244	-0.0934928584375738	-0.280752313946244	-0.0106924456725036	1.80503819444444	1.85873522079772	1.82042032808491	1.8485581405056	0
2004-07-05	0.0751201923076929	15.8437275375362	222666056	0.76146788990826	39.3787945882282	-0.248802871018192	0.138870876942948	0.14273099784122	-1551496.19220722	95.0711668190693	-4.14160624565723e-10	-38339.2038372503	-0.076350793748629	46.7699797348631	228.252205686797	93.6247965093003	-0.15858707264957	-0.0299608468548555	0.3	-4.15775940681443	-0.0845355484723813	102.297003997253	-0.0947396586357654	-0.0903646532429747	-0.367516556992276	3320803.3	-17.8081529734497	-0.77925740872961	-0.00228142710416106	0.0302402137558682	-84.3354607546766	0.23853211009174	0.239887433822233	0.219267966449522	0.281126368567654	-2.7455605169595	-39329737.0891242	-0.11416497128202	-0.334186426619547	-0.00770806967129867	1.79223993945869	1.84593696581197	1.81288168477266	1.8393301873497	1
2004-07-06	0.0641900055962565	16.1003537104291	224754685	0.680851063829779	40.6917176066729	-0.218069501483285	0.196200817978139	0.132098608443304	-1513112.95318795	96.176171531697	1.55658858188947e-10	-78.0888310091759	-0.0776705692070256	42.1507755360985	224.024466462519	93.7966517753995	-0.08903133903133	-0.0152407566627413	0.4	-0.89032314621032	-0.0480447344303483	102.228019050878	-0.107569650925672	-0.0938056527795142	-0.383451119574874	3221384.55	-19.4677181835802	-0.9303083655597	-0.00620262023511418	0.0243832702913016	-60.3031316170725	0.319148936170221	0.266307934604895	0.234947955834647	0.329027892145393	-2.72116459945632	-40025946.7557904	-0.176780213905103	0.774984675143491	0.00617120155753148	1.80726397792023	1.83480804843305	1.81156556169079	1.83380348338195	0
2004-07-07	0.0637925442612958	16.7417904086245	222831422	0.783132530120512	38.0306587459473	-0.185346609792301	0.0986818622319939	0.132124856632898	-1686714.37515395	94.8500651688953	-5.81587447116978e-10	-20483.6627492914	-0.0788476662374886	34.9535337683938	220.35251406847	92.869346544356	-0.15024038461539	-0.00801511715215796	0.3	-0.846826095793038	-0.0812263897952937	102.304186583047	-0.122622985360274	-0.0995691192956662	-0.399008330374839	3115976.5	-21.1656016007283	-0.54506708157213	-0.00661827996133671	0.0245504277611086	-79.1068580542324	0.216867469879488	0.249827779696426	0.239907897121906	0.269667544845466	-2.81694578823616	-41270411.0499079	-0.155002821641761	-1.4667871947835	-0.018629044551786	1.80503819444444	1.81950578703704	1.79955922892397	1.82321131611074	0
2004-07-08	0.0600166615791629	17.4453002901652	221002595	0.837500000000002	36.9464943581276	-0.172695114371957	0.0933817568505106	0.138201736063305	-1905527.4958444	94.5213581404488	-2.53959509346799e-10	-44826.2929019768	-0.0798642500365243	36.1211934310441	223.759905498565	93.9184843852075	-0.15858707264957	-0.00745603215120554	0.3	-1.14522915154395	-0.0861984675652229	102.391837264563	-0.143794970816891	-0.108414289599911	-0.414678290917314	3013028.4	-22.7236509996782	-0.465756180779396	-0.00504472780631668	0.0236347691074972	-88.6317222600401	0.162499999999998	0.220718519797617	0.23351143801381	0.195132683365231	-2.92301676964069	-42642031.2999078	-0.210079083299959	-2.0118418621476	-0.00786570695248079	1.7911270477208	1.8044817485755	1.78691795817153	1.81201569803	0
2004-07-09	0.0618052375864886	17.2666692293221	218682352	0.912500000000021	35.6337249652712	-0.196518676700245	0.0720928404923688	0.143124920126661	-2388061.8754354	94.0680105781935	3.38624537540718e-10	-32086.8848490891	-0.0792221971108178	35.1268600357301	224.319658411008	93.7236059698479	-0.18362713675214	-0.00766854305794811	0.3	-0.683974923525124	-0.100057028542691	102.501363140804	-0.159700042095276	-0.118671440098984	-0.431247838747784	2970478.15	-22.4984927431173	-0.151767981888256	-0.00676866231020943	0.0229575226571256	-79.3788371253192	0.0874999999999787	0.176312346531737	0.214445074186452	0.100046891222307	-3.04879949717313	-44642240.7826663	-0.120062693414912	-2.15806147263989	-0.00952125106720325	1.7777723468661	1.79140527065527	1.77292598564712	1.79982048758787	0
2004-07-12	0.0612090455840465	17.6838371155963	215126021	0.977777777777773	32.5225496585337	-0.21328012914895	-0.0124382745541608	0.152829839908901	-3150521.17163385	92.358454682984	-8.684735055715e-10	-93575.3079927917	-0.0815228867612672	33.9123919501389	230.977677285564	98.2348430530279	-0.2086672008547	-0.00949105712102828	0.3	-0.564472427941096	-0.11557097087669	102.754773975618	-0.175879769845563	-0.1301131060483	-0.45388767039094	2962015.15	-18.6721549854353	0.618254357363549	-0.00827061654396493	0.0233683717711797	-131.851288872	0.022222222222227	0.124948971761901	0.184613040044935	0.00562083519583162	-3.30040011598837	-47521175.4017138	-0.120976777094914	-3.5197909418173	-0.0242074563916983	1.75885318732194	1.77554656339031	1.74968685724053	1.78225468992232	1
2004-07-13	0.0598179309116815	18.0712072957082	216505261	0.922222222222204	34.5731576656565	-0.19897597906317	0.0955234456764126	0.165111001093442	-3111461.34689856	93.4936471213061	-2.52556484513449e-10	-64615.5585047152	-0.0810413470669873	28.192127035286	238.235608664082	96.1069744132671	-0.15858707264957	-0.0191823814276899	0.4	-0.607686460303755	-0.0883372373838651	102.827622324344	-0.185036426822159	-0.141097770203072	-0.474738416806564	2847637.35	-21.5253877926118	-0.584227657956859	-0.00799769638803438	0.0235486820168912	-129.161416771665	0.0777777777777964	0.109225240433866	0.159483773507912	0.00870817428577347	-3.40317125661564	-47245327.4017132	-0.346893885356732	-1.98515407133286	0.0081344374090403	1.74049047364672	1.77387722578348	1.73883115387735	1.77041197305481	0
2004-07-14	0.0606128535816036	18.8453641622159	214123828	0.893617021276609	33.0584821236894	-0.26197511418354	0.0805274477643533	0.16931641116471	-2871833.08095744	93.1529231427546	-3.5755279024598e-10	-13596.5197093147	-0.082628644577762	27.8991846868494	242.334602575276	92.7070962238851	-0.16415153133903	-0.0232267786796132	0.3	-0.599408002859763	-0.0922999466668867	102.936130261134	-0.190492478583154	-0.150976711879088	-0.495413424813873	2701944.9	-20.8230475463799	0.318909547997036	-0.00818956671850099	0.0235653942375806	-139.260935143289	0.106382978723391	0.108277819863707	0.142415122293177	0.0400032150047679	-3.53570264885553	-47461821.3108042	-0.301080126718388	-2.05990068783256	-0.0114068305862448	1.72490998931624	1.76497409188034	1.72510214983087	1.75718145826992	1
2004-07-15	0.0596192002442	19.2362155074843	216236880	0.760869565217414	38.0676545683883	-0.241564297801367	0.214765705870289	0.163491734401361	-2284200.44547185	95.5758604988196	4.670741733525e-10	12084.0469751536	-0.0742997913470658	33.8912005344334	248.9266606199	95.5465055634404	-0.00278222934473016	-0.0210432925146122	0.3	-1.1568871142608	-0.0016059770246446	102.792905377421	-0.190820445932993	-0.158945458689869	-0.506651725221441	2641742.6	-20.8819670705239	-0.266800911098201	-0.00543352529033826	0.0244536952623777	-90.4761904761945	0.239130434782586	0.15189535817	0.145575200918785	0.164535672672431	-3.45248817420443	-46591741.0755103	-0.347827196173757	0.295536515657861	0.0194756324723719	1.71878908475783	1.75495806623932	1.72707839784546	1.75242681019805	1
2004-07-16	0.0594204695767193	18.5745583030382	221487095	0.430555555555563	45.0756297000485	-0.131656862935297	0.413859319144762	0.15805402013904	-768292.002739057	98.805715395525	4.74749632308175e-10	174043.342959852	-0.0690741939239523	45.2274973050475	259.349535068698	99.2262146684045	-0.00278222934472994	-0.0148249834643429	0.4	-3.07304505166015	-0.0015584239467179	102.363734933624	-0.186628814545204	-0.164482129860936	-0.499429555118303	2758567.3	-11.6907835983114	0.525627684819908	-0.00272248521261817	0.0262545374673461	3.11111111110658	0.569444444444437	0.291078386928146	0.194076262921905	0.485082634940627	-3.11080232749468	-42711147.3798584	-0.257051835914166	3.13669197913837	0.0300810722726844	1.72657932692308	1.75217583689459	1.7460166823718	1.75814798133013	1
2004-07-19	0.0524648962148965	17.7370184014909	221487095	0.338709677419375	45.0756297000485	-0.14882025547284	0.433579213074738	0.14917802371781	36431.0111140534	99.1955122554673	3.72127542321606e-10	138769.371271821	-0.067772253269047	56.2993941404343	269.596867896981	98.6157552692718	-0.0472978988604	-0.00462982144496577	0.5	3.47314839512764	-0.0261684611815873	102.006492447951	-0.182759616341092	-0.168137627156967	-0.479548764614957	2747310.65	-12.087764346837	-0.885359736169134	0.00218761896063018	0.0181283648736072	31.2092534174575	0.661290322580625	0.414482365478972	0.267544963774261	0.708357168888395	-2.80746840967195	-42274316.4975059	-0.213394982392225	2.75103583390103	0	1.74271625712251	1.75078472222222	1.75864220538937	1.76282893952911	0
2004-07-20	0.05067632020757	17.1568105854204	219184951	0.548387096774205	41.3617090697902	-0.21230821583553	0.315992616065377	0.141967438938566	-137271.599804126	97.652633423197	-2.5890717946139e-10	-41633.1018518491	-0.0664703126141413	58.3392140166752	277.54137458293	98.4330293543998	-0.0639912749287701	0.00238635369177641	0.4	-5.38163478688765	-0.0359596867473221	101.892531803995	-0.177903942916651	-0.170090890308904	-0.458512911343856	2766595.3	-12.7899214570421	-0.440615102136572	-0.00143840821819727	0.0170786113510362	-16.0421183028826	0.451612903225795	0.42685921139458	0.320649712981034	0.639278208221672	-2.70042394226757	-44247582.7832201	-0.175933352659632	0.239358882785783	-0.0204836712382384	1.74883716168091	1.74466381766382	1.75500289357392	1.760082635968	0
2004-07-21	0.0457080535205529	16.9600882739641	217322970	0.661290322580683	39.475632648737	-0.255200578697069	0.252401318898042	0.128826994691119	-544499.302283183	97.1079020545162	-3.74156348212132e-10	-59764.7054732031	-0.0669161827014377	50.5802848633354	283.385584303916	98.1047865057156	-0.06955573361824	0.00856091022945756	0.4	-1.19739829298901	-0.0394575784466128	101.875050984256	-0.183694629643861	-0.172811638175895	-0.440311497652912	2736003.75	-14.5421236444077	-0.673274120419212	-0.00401403480489476	0.015438758304711	-55.5555555555552	0.338709677419317	0.397476033402826	0.346258486454965	0.499911127298548	-2.67433935562273	-45737167.5832213	-0.210314352561024	-0.982985245895166	-0.0112059613705894	1.75495806623931	1.73993402777778	1.74608481722592	1.75429464116107	0
2004-07-22	0.0476953601953593	17.5596642114345	213565856	0.913793103448255	35.4918463888062	-0.282849689424313	0.0592957421891374	0.115816637610652	-1455929.48490886	95.216922387618	-5.40830018267135e-10	-101756.826199683	-0.0658995989024023	41.2689339466618	288.345352561711	96.4922017946766	-0.12520032051282	0.00765093808917028	0.4	-0.943268084335844	-0.0717239938978179	102.059782597699	-0.190538002423831	-0.176356911025482	-0.432275657519299	2837301.35	-10.3279889346401	0.317289352793299	-0.00509419134339507	0.0164345470161059	-108.368200836817	0.0862068965517448	0.293719654452466	0.328745542454132	0.223667878449133	-2.82673759841826	-48592574.223221	-0.0296452152999498	-3.40512082841367	-0.0260952138936736	1.74549848646724	1.73214378561254	1.72530087648869	1.74146525095256	0
2004-07-23	0.049285205535205	18.8243058349018	207657015	0.815789473684214	33.4471303510209	-0.203379947541644	-0.0148348461552291	0.114225691437024	-1255685.79054767	94.380012901844	-6.19647484154098e-10	-157604.101284275	-0.0641874577671839	37.1722594170447	296.850942582016	97.3863642125515	-0.11685363247863	-0.00177885861083205	0.4	-0.861961963342513	-0.06807839736934	102.294963116016	-0.194286750210207	-0.179942878862427	-0.434506465537443	2994784.3	-1.48807040673951	1.25638885638937	-0.00560799963113856	0.0166328053715023	-168.42105263158	0.184210526315786	0.257216611740239	0.304902565549501	0.161844704121715	-3.03173130394784	-46981072.1323127	-0.083694195829078	-4.17889497055963	-0.0149834480233081	1.72045842236467	1.72351887464387	1.70309822796302	1.72641573821785	0
2004-07-26	0.0496826668701671	19.9300344190445	205537284	0.847222222222234	32.7694315051625	-0.18418256655184	-0.0353895828092571	0.107570890150182	-1442955.95065621	94.4734138780648	2.55624892435491e-10	-82825.2453926463	-0.0639377705182986	36.9231523244244	300.967099910012	96.1113076485027	-0.11128917378918	-0.0144552811160568	0.4	-0.674084593122532	-0.0652574815466671	102.477735059977	-0.200529362126976	-0.184060175515337	-0.443130833031447	2945578.65	-4.26111648404216	0.0147813239747663	-0.00640959750221667	0.016287298427038	-135.718769617079	0.152777777777766	0.222403667086081	0.277402932728361	0.112405135801522	-3.20047295870397	-48495165.7037412	-0.129700382463817	-3.4192262060542	-0.00504479112980794	1.69374902065527	1.71823263888889	1.68551423293451	1.71258492088324	0
2004-07-27	0.0494839362026864	21.2588399110655	203328304	0.944444444444431	31.1818319150043	-0.120596001929876	-0.0382113503994084	0.120816395685051	-1675353.50901299	93.6344298390277	-4.48542954763816e-10	-30356.9781094146	-0.0621007857586371	36.8226454819517	304.292463966031	96.0666960388328	-0.1140714031339	-0.0234853589141144	0.3	-0.743713144881992	-0.0676073349119902	102.678101815842	-0.207361861336582	-0.188720512679586	-0.457597164689016	2756030	-6.28023890942761	0.138507647800747	-0.00593419210621159	0.0160032718085836	-148.626045400241	0.0555555555555693	0.166787629909244	0.240531165121989	0.0193005594837546	-3.39071818533861	-49599655.703741	-0.0590149805921595	-3.11290967918872	-0.0118711044325264	1.67037829415954	1.70960772792023	1.66729970111114	1.69772777844345	1
2004-07-28	0.05047758954009	22.492730725085	204896171	0.861111111111126	34.1276967333042	-0.172662619280488	0.0986244879250715	0.129748113737277	-1588057.72637534	94.9721265602252	9.62744942461027e-11	-8424.11469462014	-0.0562509702133087	41.0254714599993	307.046514292604	95.1781981108926	-0.0556445868945898	-0.0304419610322444	0.4	-1.12282172585175	-0.0332160425629321	102.69333717917	-0.213026730758204	-0.19358175629531	-0.469902951625445	2655585.6	-9.69153189291588	-0.153958680826848	-0.00464342632618907	0.0165573466485799	-111.47646679562	0.138888888888874	0.157488049569121	0.212850126604366	0.0467638954986299	-3.42750825152015	-49479050.5498952	-0.131356510138925	-1.14077614838787	0.0101838359573598	1.65424136396011	1.70459971509971	1.66072113858501	1.68860709391423	1
2004-07-29	0.0469004375254385	23.2444317061147	206855158	0.696969696969685	38.8276978797513	-0.201941669066682	0.251755960009782	0.129699776565952	-1023590.5972191	97.0115544806477	2.60794384220271e-10	40338.2523148177	-0.0499909541876677	40.2810129243919	311.927718048289	93.9174082105085	-0.0417334401709399	-0.0281157064963217	0.4	-2.42925268712742	-0.0246045518446099	102.508186396489	-0.21483155872311	-0.19783171678087	-0.47293257891512	2571000.65	-11.3352558936183	-0.169244418670944	-0.0027603552828505	0.0174410055561275	-65.7455382843991	0.303030303030315	0.206002134056185	0.210567462421639	0.196871477325278	-3.28917726272908	-47876243.0044407	-0.167540271018353	1.06292389516855	0.0167459281273626	1.65257202635328	1.69903525641026	1.66560952805003	1.68620331447166	0
2004-07-30	0.0455093228530736	24.0231312485263	205221066	0.833333333333352	36.3162546782938	-0.199548630447559	0.166599056726628	0.126644672495246	-936031.526903681	96.0101909144202	-3.3159455456931e-11	6792.87137197559	-0.0438736165899614	42.4616937240218	312.38032318048	92.5137331821639	-0.0472978988604	-0.0210659701787297	0.3	-3.37536090397349	-0.028256380910561	102.462946476188	-0.215641483200031	-0.201393670064702	-0.473564308689745	2515923.75	-13.6159326102369	-0.777642097032125	-0.00211957236002693	0.0167552404881331	-70.8401976935739	0.166666666666648	0.192890311593006	0.204675078812095	0.169320777154829	-3.26192964392286	-48810009.8615842	-0.215115553431769	-0.112263549837739	-0.015058659652196	1.65090268874644	1.68568055555556	1.66052176632585	1.67968384690908	0
2004-08-02	0.0455093228530736	25.0273529780205	203743834	0.909090909090889	34.9632308205134	-0.185900437391855	0.141053259783409	0.127244573973965	-777797.232689582	95.6498692664564	-4.48026045218759e-10	-30733.8797631754	-0.0425538411315638	42.427781493603	320.848390299254	93.6323380236175	-0.0945957977207899	-0.0138426050696936	0.2	-1.84997417908384	-0.0561969694332998	102.462837575269	-0.216389105794111	-0.204392757210584	-0.473931101336156	2505678.85	-15.9517753472136	0.0686374435396502	-0.00330506100470679	0.016557371896749	-90.5412240768867	0.090909090909111	0.158896571365041	0.189415576329744	0.0978585614356365	-3.27089675448964	-48645872.9726946	-0.256278318296335	-0.731355164484135	-0.00846495605036685	1.64812045940171	1.67093474002849	1.65249287626852	1.67182043768086	0
2004-08-03	0.0425283628408643	25.9598445839793	202033928	0.954545454545444	34.1413274929778	-0.18805208665229	0.131209402553734	0.123328578239838	-796419.427772991	95.6676272131135	-3.16892278795706e-11	-17411.0215233218	-0.0465488371137392	43.2936078886862	332.284207086875	94.2045228521849	-0.15580484330484	-0.00692364012547843	0.2	-2.19567069798051	-0.0913916248743692	102.466491438353	-0.20787646035608	-0.205089497839683	-0.47423434011713	2486742.7	-17.0099309699686	-0.331264009090347	-0.00285924041189242	0.0164076758837389	-83.3935018050535	0.0454545454545555	0.121082562728213	0.166637905129233	0.0299718779261714	-3.28238794938653	-49378689.8298375	-0.290288678941771	-1.01492953222446	-0.00511358316838495	1.64756401353276	1.65897115384615	1.64435805355223	1.66386915957882	1
2004-08-04	0.0449131308506321	25.1277763947003	205138353	0.712121212121204	41.9756727448468	-0.140325915102037	0.364894761010413	0.117529765332827	-458889.963174678	98.5815580693533	7.23107189490771e-10	61961.7526931979	-0.0534687408685788	44.6597466632385	348.01816038387	99.3390331239054	-0.11128917378917	-0.000505072571789575	0.3	-2.93006453036281	-0.064416455857492	102.184050320922	-0.200660686723605	-0.204203735616467	-0.463693670365739	2545800.8	-12.9821693733404	0.384695165160386	-0.00231097093176347	0.0173211033787981	-31.384015594544	0.287878787878796	0.176681304445074	0.16998570490118	0.190072503532861	-3.04396001413147	-48415247.5884579	-0.0524321086843348	1.26331949750335	0.0269751690168772	1.65257202635328	1.6534066951567	1.65377339491326	1.66545732649819	0
2004-08-05	0.0439194775132278	24.3551416475127	203349994	0.863636363636389	38.8639468212704	-0.14472313365539	0.243227662508117	0.113627305212369	-700703.642135613	97.2767245175723	1.94779686685012e-10	44219.6542245328	-0.0565898314796534	33.2981581052678	353.193859358266	99.1613187429451	-0.10294248575499	-0.00185881757356124	0.3	-0.689569570673977	-0.0607068030548592	102.088242412956	-0.199564431290779	-0.20327587475133	-0.45129259704848	2543777.4	-14.0576790665771	-1.07697058855108	-0.00568041354197123	0.01485161623568	-32.0033250207853	0.136363636363611	0.163242081751253	0.167737830517871	0.154250584218016	-2.9550883553529	-50004900.032903	-0.1091302833579	-0.393143102633766	-0.0167740184356056	1.64645112179487	1.64951157407407	1.65077619133819	1.66169813698725	1
2004-08-06	0.0419321708384207	23.6376950965528	204744533	0.830508474576291	39.3481552783423	-0.119326074805484	0.277880563865286	0.108689672246264	-861575.635890037	97.7226747505859	-2.13705608001501e-10	-22938.1607794736	-0.0562509702133078	26.5301628273551	362.703911185092	99.8314154162051	-0.0806846509971499	-0.00152136491288379	0.4	-0.726780038479701	-0.0478107215219563	101.9660462607	-0.196840362063722	-0.201988772213808	-0.436377488297779	2497492.2	-16.233169019257	-0.573828004987304	-0.00555958859765874	0.0149081570810081	-44.4908373927181	0.169491525423709	0.165325229642072	0.166933630225938	0.162108428474339	-2.83936964076549	-50602559.6043326	-0.23016193534556	0.0563214603309063	0.00169012016231357	1.64589467592593	1.64839868233618	1.64970546540304	1.65912829635916	1
2004-08-09	0.0425283628408628	22.5738480746611	206360935	0.75000000000002	40.3654518579134	-0.0622017708640154	0.326691094260349	0.109089134165934	-824088.373764612	98.1985675908546	6.49729662932959e-24	6437.16474136658	-0.0527018443184295	32.2165595373684	373.254903030433	101.364782358976	-0.03060452279203	0.000337396687109425	0.5	-1.15109768675409	-0.0183438127581774	101.811304223792	-0.192827713130045	-0.200156560397056	-0.418159600821078	2400495.75	-17.1243419817433	-0.353638171104949	-0.00387011064108479	0.0144452477800182	-32.4486907289474	0.24999999999998	0.193550153094708	0.175805804515528	0.229038850253068	-2.69033657558344	-50507477.1337447	-0.167419102157012	0.365986427700793	0.00337169487010519	1.6492333511396	1.64867690527066	1.6508464676761	1.65803741924335	1
2004-08-10	0.0435220161782664	21.6536536835034	208278278	0.688888888888894	41.4235149395541	-0.0434980462442698	0.374729333133839	0.109393133763049	-438552.00398244	98.7003828695245	-1.2111761109006e-10	9831.689035794	-0.0473514032708726	32.2573374091921	386.739766620204	100.675477085413	0	0.0023530438087269	0.6	-1.72850671968684	0	101.635258535031	-0.189551764782764	-0.198035601274197	-0.3964070369468	2427400.9	-16.5849677092181	0.0292993987413634	-0.00283372310189415	0.0144037139444	-25.5864702673284	0.311111111111106	0.232737139100174	0.194782916043743	0.308645585213035	-2.51660874953391	-49357071.3337449	-0.150137778810945	0.477522149297645	0.00336036473486934	1.655354255698	1.65145913461538	1.6534619554213	1.65815660318305	0
2004-08-11	0.0405410561660564	20.7991874631427	206902202	0.689655172413841	39.5350014999671	-0.0456530025305328	0.31516996548353	0.110566952246996	-305380.080883443	98.0267763072437	2.81263539465595e-11	-4236.90961093295	-0.0415015877255438	34.9625260001559	394.655497413487	98.1732856079506	-0.00556445868946009	-0.000843207222452989	0.5	-3.55572298419239	-0.00337738863748016	101.551631351903	-0.185029688968881	-0.195434418813134	-0.375369817537829	2377133.05	-18.0972430846788	-1.00441513894651	-0.0015929471274685	0.0129521204271277	-34.4086021505534	0.310344827586159	0.258606368595502	0.216057400227663	0.343704305331181	-2.41864392223464	-49632286.5337455	-0.161472452460608	-0.53280325384448	-0.0084221797672881	1.64978979700854	1.65118091168091	1.65056856501021	1.65572481791123	0
2004-08-12	0.0397461334961328	20.9924575987649	203728056	0.820512820512863	35.3675201333611	-0.0740825244880896	0.170889712496978	0.112897175078342	-370260.873977594	96.380574205278	-4.76766482942026e-10	-62558.6104433738	-0.0368110344071864	38.606763548144	401.240474785338	97.6398158268718	-0.01947560541311	-0.00101596066070355	0.4	-2.76000763850766	-0.0120137222792886	101.643664626724	-0.182353588633997	-0.192818252777307	-0.361830871449231	2430187.75	-12.2560055433443	-0.621411084109161	-0.00198057826549444	0.0134516720842024	-207.047949162337	0.179487179487137	0.23223330555938	0.221449368671569	0.253801179335004	-2.47536674896157	-50192429.9455109	-0.0717442227956662	-1.9469282659256	-0.0205074380743348	1.64311244658119	1.64478178418803	1.63751072069056	1.64766485684578	1
2004-08-13	0.0409385175010164	20.378429728118	205918877	0.666666666666666	38.8390493300306	-0.178694544987738	0.272748748228753	0.10233968421465	-540409.780864835	97.8348972853875	5.29993102586077e-10	-34701.1134481748	-0.0332975781192906	38.690822262499	397.351659920004	99.4899468940866	-0.0194756054131	-0.00203674958880771	0.5	-9.75995061011491	-0.0118912707435852	101.593435997209	-0.177315130468199	-0.189717628315485	-0.34893269736096	2277218.05	-11.2104539580477	0.0329871655803586	-0.000881173426758276	0.0138073653485434	-74.6352413019237	0.333333333333334	0.265933314817365	0.236277350720168	0.32524524301176	-2.4125579121639	-50849676.2455107	0.0107511472054791	-0.76313346589706	0.0103062874930632	1.63921732549857	1.64255600071225	1.6343699498336	1.64410550253194	1
2004-08-16	0.0423296321733814	19.4768963447262	207746285	0.589743589743567	40.5582103936853	-0.199851737685219	0.327380840144579	0.0817287091271774	-670206.398765586	98.7740859531131	2.43566848390646e-10	25912.5016693449	-0.0323701683377144	46.0518435541266	385.514049775504	100.512667984893	-0.03895121082621	-0.00408181280817297	0.6	8.22274339320436	-0.0235236157025628	101.483331485575	-0.168811928453222	-0.185536488343033	-0.334229344098869	2244819.7	-11.6071952075927	-0.189632301149132	0.000327940909996858	0.0135156587375491	-32.5581395348877	0.410256410256433	0.314041013297054	0.26219857157913	0.417725896732903	-2.29613969549487	-51246938.8542061	0.187931971025425	-0.141480966069471	0.00511358316838495	1.6358786502849	1.64255600071225	1.63505833194035	1.64271088319047	1
2004-08-17	0.0417334401709393	18.6397582030052	208906609	0.564102564102535	41.1520066108619	-0.149360989573009	0.358321320564801	0.0617502904574287	-553744.68110773	99.2670895114266	-2.33493407387584e-10	9240.54598468987	-0.0308363752374141	40.8187954060861	382.682237630446	98.0039058505734	-0.01112891737891	-0.00716022131275663	0.7	68.9956919759824	-0.00676622269551241	101.36100109346	-0.161818889468545	-0.180792968568135	-0.317562157877849	2187728.7	-14.4233023649256	-0.301016820438877	-0.000281751280903535	0.0132237003994241	-56.9377990430741	0.435897435897465	0.354659820830524	0.293018987996261	0.477941486499051	-2.1655950615593	-50782809.2542055	0.211589652617054	0.170017701971476	0.00169873335485443	1.63198352920228	1.64366889245014	1.63644466312643	1.64207569088285	1
2004-08-18	0.0427270935083421	17.7905066388881	212695774	0.41025641025643	44.7201966270695	-0.138101004584486	0.585782502547368	0.0422636930065617	-779958.913044758	100.498122291718	3.2175321474554e-10	33241.121906151	-0.0268592140587309	44.6836594178676	386.767630231158	100.67661968815	0.0194756054131	-0.00476697942228301	0.7	-10.8639481349196	0.01183097631847	101.156663595943	-0.152581547214883	-0.175150684297485	-0.296021946396363	2284087.9	-6.55866624383584	0.659718175296781	-0.000760549794566721	0.0126637428011336	89.3289328932965	0.58974358974357	0.433021077134873	0.339686351042465	0.619690529319688	-1.95805123180973	-52045864.2542067	-0.019180063390394	1.21880556166081	0.0101322429636156	1.63420931267807	1.6419995548433	1.6429333426066	1.64459114737087	0
2004-08-19	0.0425283628408614	16.5236809316484	210484695	0.512820512820563	42.8546434812474	-0.0743888806576528	0.455813589401276	0.0312205975377561	-759199.999982849	99.940830807947	-3.18583285141497e-10	19323.5204104211	-0.0234349317882949	43.8085156805049	389.642842333472	99.8311307286468	0.0166933760683698	-0.000678225841499364	0.7	23.2085507828265	0.0102011505812716	101.0454795095	-0.147479052020401	-0.169616357842068	-0.274178833498107	2206786.15	-6.16540912276959	0.30239333327331	-0.000173041088827573	0.0121347679049667	-2.07039337475875	0.487179487179437	0.451073880483061	0.376815527522664	0.599590586403855	-1.82686615632447	-51875781.2542073	-0.0712516816323385	0.538541992361588	-0.00674340890558334	1.64088666310541	1.6419995548433	1.64354948980041	1.64462580861035	1
2004-08-20	0.0433232855107843	15.580561685269	212576649	0.333333333333334	47.0198793206731	-0.0843391477063456	0.831459470214338	0.0313404577810718	-303371.559170991	101.107122001234	1.29509542004081e-10	8067.57756855692	-0.0215622774216506	50.0259185957894	399.546678093822	100.673203417999	-0.00834668803419003	0.00270099611116053	0.7	3.23666494044591	-0.00500272817679182	100.840736379211	-0.14533726815909	-0.164760539905472	-0.248330331999125	2015941.8	-6.21407045716725	0.347928491066632	0.00127482132062696	0.0122822706044442	59.0612002376697	0.666666666666666	0.522938142544263	0.425523065863197	0.717768295906394	-1.6091935796566	-50381528.3970646	0.0223208651500004	1.18408445426221	0.0117712902588137	1.64812045940171	1.64366889245014	1.65045212306732	1.64819518697232	0
2004-08-23	0.0447144001831485	14.8630654840678	210943974	0.512820512820563	43.597669682801	-0.0707806639869265	0.460580904604123	0.0307163087623803	-325525.041528083	99.940830807947	1.32752938304871e-10	4472.36828926497	-0.0162118363740937	50.120454575259	397.895761758474	99.1613187429451	0	0.00421603611225834	0.6	4.58608498432533	0	100.778890220918	-0.144858360395812	-0.16078010400354	-0.224970625418608	1991589	-7.87506308857074	-0.0462186242704146	0.000803267848545294	0.0126665859046608	35.1598173515918	0.487179487179437	0.511018590755987	0.454021574160794	0.625012623946375	-1.51427460918834	-51314485.5399224	-0.0186085617694538	-0.168869271353245	-0.0117712902588137	1.64978979700855	1.64283422364672	1.64856201010756	1.64757456828426	1
2004-08-24	0.0415347095034578	14.0152578366673	212554439	0.361111111111118	46.0155799250805	-0.0279206999671601	0.669361990569685	0.0304138353436592	-150597.491358966	100.540564237708	-1.56213270152987e-10	-6937.30107060223	-0.0105938732741597	41.5676986130991	399.206277655022	100.67661968815	0.00834668803419003	0.00639543247099169	0.6	-13.3014099494488	0.00505328874326977	100.660296368339	-0.140777991778908	-0.156779681558614	-0.20137516353359	1961663.25	-9.25615290895569	-0.656305555879646	-0.000666453269036281	0.0103282538165492	38.0246913580175	0.638888888888882	0.553642023466952	0.48722839059618	0.686469289208497	-1.36895563588586	-50695075.9245381	-0.0394535850619937	0.308984920133777	0.00674340890558334	1.65312847222222	1.64255600071225	1.65101157392735	1.64909022888112	0
2004-08-25	0.0401435948310935	13.2280078783667	211553319	0.454545454545444	43.5049839052368	-0.0479252292197372	0.389874468870169	0.0304137903423606	-218129.60205777	99.7127767291467	8.50535414270227e-11	1998.00235933714	-0.00745494785959289	42.8013684540205	401.37390282283	101.899256369996	-0.01112891737891	0.00488895293005094	0.6	12.3350191192651	-0.00675479653758465	100.635134794809	-0.136583462387192	-0.15274043772433	-0.181416061314132	1933325.9	-12.7807564388893	-0.580179066326961	-7.83665561783537e-05	0.00955454108245158	24.7834274953013	0.545454545454556	0.550912864129487	0.508456548440615	0.635825495507229	-1.30666694628697	-51332152.2881743	-0.0214701133340985	-0.561633003761792	-0.00843639041074923	1.65034624287749	1.64227777777778	1.64800756756601	1.6478010154197	0
2004-08-26	0.0407397868335357	12.6381323457066	209277090	0.696969696969739	39.7665121506367	-0.147039133314325	-0.0257753441192386	0.0299052225238399	-758692.2600189	98.5276049896848	-2.21046304319034e-10	-32295.3280804858	-0.00652753807801676	41.4870378157055	405.884051470681	99.4873320151066	-0.03895121082621	0.00135278171692785	0.6	-4.8393945449111	-0.0237631967086182	100.724319710553	-0.130999447967314	-0.148392239772927	-0.169127576790362	1949188	-10.3228985459037	0.489956231609355	-0.00116742887616871	0.0101854016372704	-105.164319248848	0.303030303030261	0.468285343763078	0.495066146881436	0.414723737526361	-1.35084246282478	-53608381.2881743	-0.103947642297127	-1.55014975957351	-0.0136480354361642	1.64533823005698	1.6431124465812	1.63858561840583	1.64269932535893	0
2004-08-27	0.0399448641636128	12.7686994410293	207442805	0.818181818181887	38.0078474236908	-0.140462236093435	-0.128430821718678	0.0336747706011447	-1086714.54210286	97.975002028726	-3.56595409493964e-10	-35538.7675836966	-0.0066523817024593	35.4333144550945	413.503591672908	98.2998229802886	-0.0361689814814798	-0.00425623162703997	0.5	-2.33762381345464	-0.022235527060378	100.838155436678	-0.124774884908685	-0.143668768800078	-0.164115149153565	1959197.65	-10.0638468513045	0.126452068259415	-0.00189944194317739	0.010201894837474	-162.790697674422	0.181818181818113	0.372796289781423	0.454309527848099	0.209769813648072	-1.4246948596229	-54313875.5189442	-0.161289364645534	-1.86702045640678	-0.0068945101190479	1.63420931267806	1.64116488603989	1.6285946798394	1.63650177578577	1
2004-08-30	0.0409385175010157	12.2793103079753	208832122	0.515151515151517	44.6037008425167	-0.127208389920466	0.384793462984195	0.0345424511214612	-934755.90266715	99.6695610005038	2.78582934156431e-10	9120.18952546625	-0.00370963912630318	41.1444939348694	418.924014462526	99.8302708675994	0.0250400641025701	-0.00528312390530193	0.5	-8.39809703661111	0.0154198706614481	100.758689502421	-0.116246905048297	-0.138184396049722	-0.157190910137017	1954801.9	-11.6145678705803	-0.322128113986697	-0.000904455312260704	0.0113676192731591	-68.301687763718	0.484848484848483	0.410147021470443	0.43958869238888	0.351263679633569	-1.331612797732	-53619217.018944	-0.153676350440722	0.113473751624364	0.0171479596474913	1.63253997507123	1.64116488603989	1.63120815194422	1.63648965221633	1
2004-08-31	0.0417334401709385	11.7940283031547	211849384	0.212121212121259	50.2986181915072	-0.0845878827096286	0.841802926636922	0.0351431495250057	-590267.274850257	101.252593952807	3.80977461954312e-10	61300.5670183406	-0.00123060144093556	49.2443666848636	430.744368223774	100.504054235913	0.0361689814814798	-0.00578847501277292	0.5	4.43637297248284	0.0219724408400854	100.537866074597	-0.10473662372637	-0.131494841585052	-0.142884281306266	2020169.7	-6.05460457287055	0.785113827095426	0.000909014885429041	0.0120846431055619	108.774509803907	0.787878787878741	0.536057610273209	0.471744998350323	0.664682834118981	-1.10836687073358	-52796327.3825804	-0.124270636522716	1.61379629903452	0.0168588576717004	1.63420931267806	1.64366889245014	1.64222456449653	1.64153833174084	0
2004-09-01	0.0411372481684971	11.3425789657691	210486217	0.656250000000033	43.548752769577	-0.139760903125538	0.177525365537352	0.0336054763879988	-661309.523278259	99.0252982533103	-5.90568296601939e-10	15425.0717815134	-0.00194399358060982	52.407071354897	430.616119902723	98.8159155457382	-0.01112891737892	-0.00597092282052007	0.4	5.46877908925015	-0.00682393827512712	100.573285105971	-0.0983921014980209	-0.124874293567645	-0.133001317650361	1933106.8	-8.27481953095895	-0.845227950732646	0.000687159978853547	0.0125244378703746	-33.5305719921198	0.343749999999967	0.471955073515462	0.47181502340537	0.472235173735647	-1.1098562385876	-53818702.6325803	-0.090805221426644	-0.454410643300448	-0.0236827959468275	1.63087063746439	1.64060844017094	1.63658510258933	1.63858703120158	0
2004-09-02	0.0401435948310943	11.463893196854	208516429	0.687500000000042	43.1038026852151	-0.0948029203724553	0.166695738974499	0.0341618490904483	-596546.499832794	98.9228598864555	-4.42098344720808e-10	-29288.7035924135	-0.00237202886441512	44.8444529453031	424.059887971853	97.4923686425126	-0.0166933760683801	-0.00426349018775117	0.4	25.7175832998893	-0.0102359570639307	100.604638739548	-0.0948898135020086	-0.118877397554518	-0.126569272185406	1942178.25	-7.51038022511307	-0.106350436675143	-0.000175082792450709	0.0122191242935679	-108.424908424917	0.312499999999958	0.418803382343627	0.454144476384789	0.348121194261305	-1.11215422597755	-53687383.4325803	-0.0524965702765885	-0.426858592853194	-0.00171328543394916	1.63142708333333	1.63838265669516	1.63189805153629	1.63566647087951	0
2004-09-03	0.0371626348188843	11.5765421257185	207313127	0.781250000000063	41.7264260910788	-0.103158089940863	0.063128678459053	0.0356033986719054	-713955.015091591	98.5142396494564	2.57318615831301e-11	-7761.99419070605	-0.00349562148440175	39.0472164374323	423.968128693991	98.1392958575883	-0.0417334401709402	-0.000511270055351229	0.3	-8.62507263218719	-0.025525739134483	100.662384323082	-0.0903728264235066	-0.113176483328316	-0.124024758033559	1932616.4	-10.0438532844476	-0.41782912482083	-0.00090872148436995	0.0121846052730426	-97.886178861797	0.218749999999937	0.352118921562397	0.420135958110658	0.216084848465875	-1.14222641977426	-54589859.9325803	-0.116761495238224	-0.882676796130393	-0.00515753910693673	1.63253997507123	1.63337464387464	1.62599112148953	1.63175934188251	0
2004-09-06	0.0367651734839228	12.1390114896437	206438315	0.812500000000069	41.2532113087201	-0.0961462897091537	0.0890969641527421	0.0387319357680452	-601050.578167617	98.4698406822601	-4.24729434530169e-10	-6238.75701121832	-0.00477972733581522	39.4921354158046	426.952081831174	97.3117107417963	-0.0333867521367499	-0.00153852979132502	0.3	-5.77605155359987	-0.0205074380743348	100.708960493925	-0.0853472293218962	-0.107610632527032	-0.12417644015752	1895536.9	-13.5919941280071	-0.28244554931571	-0.00115327846450503	0.0121625537212104	-128.510638297878	0.187499999999931	0.297245947708242	0.379172621309853	0.13339260050502	-1.16673431622738	-54152453.9325805	-0.170633700131831	-1.08168291899428	-0.00172510784543511	1.62753196225071	1.63003596866097	1.62112575834344	1.62805674009502	1
2004-09-07	0.0371626348188843	11.373223755826	207503519	0.310344827586284	49.831336239979	-0.114182704786654	0.71301870554405	0.0381634030948281	-352104.444426231	100.875814521109	1.42069164663717e-09	19528.5289797012	-0.00647403366754107	32.365936933667	437.327810426925	100.50832462223	-0.0139111467236499	-0.00291108826808742	0.3	28.2266158169521	-0.00839390162133358	100.52160642348	-0.0770699167003788	-0.101502489361701	-0.116935561297105	1852929.95	-15.6069404724766	-1.26897934808443	-0.000154092331940232	0.0136492956428533	26.3390880920605	0.689655172413716	0.428049022610066	0.395464755076591	0.493217557677018	-0.982562019734223	-53588522.4031688	-0.0922180195356377	1.16542023475518	0.023884826711815	1.62474973290598	1.62947952279202	1.63086591985479	1.63210937696456	0
2004-09-08	0.0369639041514036	10.6621351458524	205927035	0.379310344827682	48.7364998728538	-0.0920781705952883	0.629435916511324	0.0378658801364596	-89588.2664464563	100.535692376989	2.94610035750802e-11	16359.3527421648	-0.00711608659324758	33.2694378905998	455.21320466132	101.545929439987	0	-0.000683323767712375	0.3	12.520032051283	0	100.404134552511	-0.0732816379886032	-0.0958583190870817	-0.106457356329115	1862950.35	-14.6312225373521	-0.338283580788614	8.51242016035195e-05	0.013554373951141	23.2078853046431	0.620689655172318	0.492262566797484	0.427730692316888	0.621326315758674	-0.854200098696145	-53063027.7365025	-0.065671041760101	1.02533596978652	-0.00337738863748016	1.6286448539886	1.6297577457265	1.63550454129921	1.63441345100519	0
2004-09-09	0.0383550188237678	10.8232827075949	203934426	0.843750000000078	40.9795867592815	-0.108498333237349	-0.075111268790065	0.0385758814924468	-257618.573508851	97.8479954940528	-6.93428978094063e-10	-48737.301905271	-0.0089709061564005	24.2069133020677	457.479532986265	99.4811251023151	-0.0556445868945901	-0.00222688898976297	0.3	-1.95818148838274	-0.0341811932485153	100.54861889021	-0.071068871182993	-0.0909004295062639	-0.104115624671208	1803873.5	-11.6932493161615	-0.0486537221029479	-0.00269384951758328	0.0148820405670952	-103.030303030319	0.156249999999922	0.380258377864963	0.41190658749958	0.31696195859573	-0.96117873710746	-54106775.3079314	0.0960389317773465	-1.45629226262943	-0.027437784342932	1.62419328703703	1.62781018518518	1.62375839909026	1.62820484439922	1
2004-09-10	0.0401435948310935	11.1152624678559	206156139	0.382352941176446	48.6769161416839	-0.0393751157137893	0.550371445469108	0.0393894211025067	202105.761407234	100.195570232869	-8.013564439399e-11	-1081.95612979678	-0.00898874095989255	33.0693898429216	464.130216546545	100.170017701971	-0.00278222934472994	-0.00102463557264855	0.4	32.6174227217369	-0.00169585255286636	100.437272673138	-0.0662440878638535	-0.0859691611777819	-0.0978891106318325	1805418.1	-8.22236003066798	0.308058745985926	-0.000119368225514243	0.0162577492664151	-44.7974217311282	0.617647058823554	0.459387938184493	0.427733704394551	0.522696405764378	-0.843975270634667	-52271447.1774961	0.217624842063538	0.769659610409642	0.0240489502848997	1.62920129985755	1.63087063746439	1.6289113745597	1.63020711369001	0
2004-09-13	0.0417334401709393	11.3863865309553	204431416	0.852941176470558	41.9442525442497	-0.0464171093988799	-0.0501324690826334	0.0436426411459965	203759.67273505	97.5990766069067	-2.5133589979004e-10	4880.6061921404	-0.00904224537036824	32.9823983720579	459.443612527237	95.8206144041878	-0.0250400641025601	-0.000513369820283777	0.3	-2.60787927257604	-0.0155800352872815	100.586519264767	-0.0656427592773503	-0.0819038807976955	-0.0991893362425778	1800283.85	-7.69002974786085	0.0685435007071593	-0.00254242951591413	0.017623180506568	-131.391585760516	0.147058823529442	0.355278233299476	0.403581880696193	0.258670938506043	-0.960363687011201	-52918218.3024958	0.111750925397677	-1.77090019147979	-0.0275322181705793	1.62586262464387	1.62669729344729	1.6175081350341	1.62375157592508	1
2004-09-14	0.0443169388481878	10.7156350301536	207727599	0.323529411764776	50.2765097934895	-0.0146552488202042	0.652839911598224	0.0436366447347692	619714.891805984	100.64694720731	5.13128314683383e-10	44148.0340767321	-0.00570713711739113	42.8715646254932	465.916634207232	101.198273018797	0.0361689814814798	-2.73327762950776e-16	0.3	14.3658145852306	0.022235527060378	100.417541832421	-0.0616634044655271	-0.0778557855312619	-0.0935390829621796	1907076.8	-0.432133826780105	1.19164575908269	0.000300783166304814	0.0196945203640348	44.3280977312349	0.676470588235224	0.462342351611392	0.423168704334593	0.540689646164991	-0.795575883352506	-51341782.9546703	0.25432066944042	0.967821559100107	0.0309210522286116	1.62474973290598	1.62474973290598	1.62659935141874	1.62757525015471	1
2004-09-15	0.0512725122100114	12.1007722937078	218212470	0.241935483870967	58.7727249140088	0.0936506821614136	1.36334335432175	0.0536860846315273	1763321.77003146	104.554925576867	7.3089999155986e-10	432592.42287662	-0.00148028868982197	63.8278524337619	462.088773659672	105.48721262713	0.0751201923076898	0.00288735552420313	0.4	2.45940344709992	0.0448823285469687	99.9316787844467	-0.0517836422548319	-0.0726413568759759	-0.0688784905653606	2241862.1	25.7198899897241	1.52741323467082	0.00416881920548197	0.0219522346820681	245.036572622783	0.758064516129033	0.560916406450606	0.46908460503993	0.744580009271957	-0.331983945993175	-47846825.9546703	0.574722258776366	4.41295744241635	0.039794761134082	1.63810443376068	1.63337464387464	1.65491799709968	1.64284434802868	1
2004-09-16	0.0526636268823764	13.3869711812939	224731386	0.20967741935483	59.3953732825625	0.0421869400095537	1.16752595787953	0.0707506797384482	1543391.10874977	104.663593402707	2.96859175922545e-10	368192.908653882	0.00014267842793636	73.0713290722157	453.46676369156	106.377396598064	0.0528623575498601	0.011219509659604	0.5	2.15991645818776	0.0312693098754723	99.5504398191339	-0.0396676147660202	-0.0660466084539847	-0.0327384366438976	2457253.95	30.3450137892141	1.26805334464919	0.00489181277338944	0.0217261962946655	229.433864490219	0.79032258064517	0.637385131182127	0.525184780420663	0.861785832705056	0.0598160192850639	-49802500.7546695	0.528693034399185	3.98759432671259	0.00324583900020403	1.66147516025641	1.64283422364672	1.67565191378345	1.65634896605092	1
2004-09-17	0.05365728021978	14.910366034721	234144429	0.0434782608695246	64.3271124301813	0.13694820449649	1.30796043675911	0.0904368464049956	3303236.60153084	107.219251655146	9.25141863529696e-11	240745.69728233	0.00584981554532971	77.9325226044329	442.765042453674	109.496281849977	0.13911146723647	0.0169918194848233	0.6	1.99619955865846	0.0821244745976643	99.0397534606833	-0.0261293953308079	-0.0580631658293494	0.018680898823864	2823308.4	37.3779801126797	1.91328402122923	0.00562388950436136	0.0223403027829682	194.120909595114	0.956521739130475	0.743764000498243	0.598044520446523	1.03520296060168	0.590699474048284	-42648588.0746675	0.705174893640336	5.11043471521224	0.0271723687753644	1.68651522435898	1.65785826210826	1.70524049119277	1.67599781695282	1
2004-09-20	0.0568369708994707	17.2068874476151	246763621	0.0108695652173936	70.0819562165409	0.303083709693515	1.38200259262244	0.124842884336352	7069450.7343018	110.809010784078	3.77250150239747e-10	661477.156505949	0.0155519486448985	82.0093062607588	436.649315536666	111.126582530462	0.21144943019943	0.0312813792338053	0.7	1.76486324477231	0.122501928498051	98.343510732772	-0.00892418926876259	-0.048235370517232	0.0914109633092686	3372634.25	44.4278503181995	1.43086903206732	0.00722528838754224	0.0239632225384072	203.907957320989	0.989130434782606	0.825552811926364	0.67388061760647	1.12889720056615	1.32407248565196	-30870675.5413343	0.948589446794142	7.18148562232118	0.0386641684664373	1.73436956908832	1.6801160968661	1.74815145400506	1.70472064653043	0
2004-09-21	0.0590230082417579	19.5600847675612	236170952	0.171717171717143	65.9567853770265	0.22343399837589	1.09318576699954	0.150950958704289	7196346.88111967	108.793153517812	1.67711615370129e-10	306248.02322605	0.025147072923517	86.6748760214975	414.06325113725	109.98014040021	0.19475605413106	0.0403039136762725	0.6	1.63806659861506	0.113911951917314	97.994285094401	0.00481736298487201	-0.0376248238168112	0.166381129759774	3821744.45	45.0418331125305	2.0503514890228	0.00792179618707374	0.023131747871953	154.51836136788	0.828282828282857	0.826462817378529	0.724741350863823	1.02990575040794	1.75717391213581	-33616923.0598507	0.86348887786745	3.55716550577523	-0.0137475156876736	1.76719987535613	1.69597480413106	1.76841207451239	1.72366840452982	1
2004-09-22	0.0671709656084643	22.6687380439619	261414363	0.376811594202909	66.8896145612994	-0.0562024033190023	0.983586180020516	0.184241879677662	-378869.072116032	108.87947148214	4.22252039331351e-10	7845.36230183434	0.0355804329662521	92.426695405786	388.255236759029	113.734972965957	0.2086672008547	0.042147890858575	0.7	1.58189157768751	0.121770411053848	97.7242577193352	0.0170738374736534	-0.0266850915587183	0.239560426570318	5033859	55.647747567621	2.55063924842694	0.00848351171575325	0.0229747662168183	157.565872020072	0.623188405797091	0.758704680184716	0.736062460637454	0.80398911927924	2.12263184237036	-56990451.7635541	1.30974152231692	2.4803890727228	0.00613335129109915	1.78890126424502	1.71350284900285	1.78562879397692	1.74119455514366	1
2004-09-23	0.0751201923076907	23.9078235244352	271342210	0.224637681159421	71.3310852652924	0.0527879570978594	1.08359388131022	0.200626478397096	-749475.796130404	111.511641205801	-9.7307286847669e-10	430492.163850977	0.0460316278124795	83.7499237645466	358.792204943589	114.596705386453	0.22814280626781	0.0438453068643498	0.8	1.40981866689169	0.129482646374469	97.2970553807829	0.0337379472800856	-0.0146004837909575	0.318736637813077	5416439.9	49.7978238372253	2.11027419226815	0.0111439267476098	0.0234273420403108	108.784874337099	0.775362318840579	0.764257226403337	0.745460715892749	0.801850247424514	2.64681853129192	-47889925.3468876	1.30335509553634	4.13877036044698	0.0315970620324356	1.82117512464388	1.74132514245014	1.81658221236638	1.76615719041669	0
2004-09-24	0.0814795736670729	25.1418665649393	258101368	0.471014492753629	57.8100431723581	-0.0514037790086582	0.761766246582256	0.207728696857074	-4505315.16514008	105.348129129462	1.63692311672364e-10	-336237.759581992	0.0522738090346284	74.0715123859157	329.363214147127	111.863761145026	0.13911146723647	0.037958818761073	0.7	2.11908850533217	0.0811904742930976	97.4721489100577	0.0403454791680298	-0.00361129119916006	0.374085406449787	5986767.75	46.9905943328801	2.71705241650542	0.00767008638530823	0.0285317857086784	80.1058201058195	0.528985507246371	0.685833320017682	0.725584917267726	0.606330125517593	2.59001644973287	-60468725.2468875	1.15528496579537	-1.71178441198054	-0.0516695607188513	1.8250702457265	1.75579273504274	1.80568589205242	1.76938192878174	0
2004-09-27	0.0878389550264543	24.4911189220871	250560216	0.681159420289859	49.2371400453555	-0.107125450873463	0.515678639066439	0.205562995518322	-7602136.3741026	100.385357056303	-1.334416832425e-09	-930491.614360765	0.0593542260208952	69.1619693033451	293.805304293563	103.552253362787	0.10294248575499	0.0179407138840184	0.7	5.53238347472613	0.0623439470681777	98.0232570075771	0.0417363512504367	0.0054582372907593	0.39225447000022	6294359.5	40.244245020702	1.95720862538135	0.00271280906452018	0.0313354265129763	15.0501672240788	0.318840579710141	0.563502406581835	0.671557413705763	0.34739239233398	2.14798331646151	-67104939.0068873	1.33218555171025	-5.6268630003831	-0.0462843115678518	1.79891728988604	1.76664342948718	1.77152679484406	1.75735041453549	0
2004-09-28	0.0898262617012607	23.4495575581301	243948054	0.7391304347826	47.1594991776998	-0.14300318352022	0.447014690136583	0.204451994535236	-9328727.16098977	99.0247884803914	-5.92369767119472e-10	-377813.81321223	0.0614408980294416	66.4075177832153	268.028093785842	98.211888158195	0.0417334401709399	0.00172583117158739	0.6	7.53273424995526	0.0251406779112748	98.5766688393645	0.0404520214698316	0.0124569941265738	0.380603736869412	6474104.5	33.8050784742566	1.43371362967898	0.00202020283156724	0.0315864126062121	-31.7822651448644	0.2608695652174	0.46262479279369	0.601913206735072	0.184047964910927	1.6748885628395	-71312678.461432	0.998287868991026	-5.52508608417675	-0.0131543188720031	1.77332077991453	1.77026032763533	1.74133478511922	1.74345956928713	0
2004-09-29	0.0894288003662993	22.01617683656	236209478	0.818840579710155	44.386102122482	-0.167740398244402	0.353913828918227	0.20250943634787	-10603707.12943	97.1502228014774	-2.18562798592106e-10	-192003.917378928	0.0662919645792259	63.5694770815379	246.932322338989	96.1113076485027	0.0556445868945801	-0.0142360355943639	0.5	5.78858065854585	0.0342984408660917	99.1665310294789	0.03798238043632	0.017562071388523	0.343816668893826	6792874.95	29.3076529804147	1.35677285601695	0.00265292521814628	0.0310430274067573	-66.1742074484473	0.181159420289845	0.368803001959075	0.524209805143073	0.0579893955910797	1.14302483095727	-76607493.6193287	0.419472451830768	-5.84649234670554	-0.0183744552157624	1.73937758190883	1.76413942307692	1.71100527103864	1.72652987357629	1
2004-09-30	0.0866465710215708	20.6851804522448	239645378	0.782608695652175	45.9422916875015	-0.164125770914091	0.38633608868283	0.198860068771558	-10074511.6346643	97.8489313412386	-4.0552519654291e-11	-94519.0582710324	0.0670588611293761	63.9069232661064	223.065660709855	94.3233249431233	0.01947560541311	-0.0367349185710188	0.5	9.21055974794927	0.0117712902588137	99.5552696444675	0.0384849411347317	0.0217466453377647	0.296175529044729	6866180.55	21.5665406728871	0.436000380130745	0.00151640884450746	0.0304739956938221	-71.0340398201683	0.217391304347825	0.318332436088658	0.455584015458268	0.043829277349439	0.776369711323088	-76225726.9526621	0.258233399069178	-3.6250911525141	0.00839390162133358	1.69653125	1.75885318732194	1.69542264389281	1.71520760376262	1
2004-10-08	0.0884351470288965	19.7400631279792	244244439	0.78787878787879	47.2148153857635	-0.129784707583239	0.412562372707324	0.195390828158664	-7983855.88588891	98.3263230708408	-3.28209611636287e-10	49489.9394587027	0.0619046029202301	62.5757045198435	193.562665822167	91.3528149093638	-0.0361689814814798	-0.0448524319108191	0.5	3.68163209205064	-0.0213587128444058	99.7977808727066	0.0406609844530994	0.0255295131608317	0.246468106742137	7035968.5	16.1195068783866	0.980785694343938	0.00393381442575037	0.0293459651571261	-87.912836227446	0.21212121212121	0.282928694766176	0.398032241894237	0.0527216005100519	0.531429720232879	-72853082.2193279	0.246434624749773	-1.04079811151251	0.00666475803086242	1.67482986111111	1.7499500534188	1.68874386492189	1.70796736798398	1
2004-10-11	0.0894288003663	18.8903261124986	251805245	0.769230769230773	48.5198813717846	-0.174212342945748	0.428199711440524	0.187753128813121	-8353738.67649549	98.7617593111396	7.18711958609285e-10	67663.0775907918	0.056357979034263	63.7480882793091	173.636248961599	93.2325813164411	-0.03060452279203	-0.03811749205252	0.5	5.70069010618341	-0.0179839188926404	99.9256149294212	0.0413855339724858	0.0287007173231625	0.200243146458412	7370268.2	14.7059855144454	0.830212665914608	0.00216513758075621	0.0282901736694919	-41.2763713080169	0.230769230769227	0.265542206767193	0.353868896851889	0.0888888265977996	0.385199993390795	-79832287.7577914	0.159434552686459	0.580745099546625	0.00662063295196946	1.67149118589744	1.73520423789174	1.68800098473425	1.70406697823398	0
2004-10-12	0.0848579950142443	17.8595983301337	246221152	0.915384615384597	43.0723773230846	-0.198996556604857	0.261971474031437	0.18719526814748	-8829265.63709939	95.7129400851202	-6.84101225125266e-10	-105522.367732823	0.0455679229216908	58.4348365388412	173.590204708235	89.758077348859	-0.13076477920228	-0.0334798608459137	0.5	-3.35986258981485	-0.0770021602834679	100.292657345035	0.0358478372982929	0.0301301413181886	0.146982331400158	7596212.65	11.3244689895606	-0.630011340938607	-0.00297352772776096	0.0272883575321035	-99.9650227352203	0.0846153846154032	0.20523326604993	0.304323686584569	0.00705242498064995	0.017883946333086	-83820925.614934	0.0826163846011658	-1.89359959238659	-0.0318458726154631	1.66203160612536	1.71767619301994	1.66988494542587	1.69126441252037	1
2004-10-13	0.0834668803418793	16.9024939607948	249350980	0.83846153846153	46.4783297067254	-0.189425730182835	0.345677360672215	0.18585134227816	-7801054.52996238	97.2954216532791	-3.21520548882455e-11	-104054.663851034	0.0313000801282071	57.3210052858772	173.194864186614	88.4474232635197	-0.17249821937322	-0.0225686822173871	0.5	-5.48587813060717	-0.0987790002960565	100.418624538515	0.0358725406969997	0.0312786211939508	0.0983557627411091	7673879.85	5.63745648454324	-0.733730053482049	-0.0019892696559401	0.0277743230103237	-80.8317089018842	0.16153846153847	0.190668331212776	0.266438568127305	0.0391278573837188	-0.140185791165937	-82135633.6149344	-0.195002031565987	-0.0279014409320643	0.0168873284538487	1.66425738960114	1.70181748575499	1.66708168370272	1.68584818483601	0
2004-10-14	0.0844605336792829	16.7433791917647	242932279	0.992753623188404	39.37476676081	-0.215445542295107	0.101068284284954	0.185993463860681	-8373456.04257052	92.7788306376736	-3.79882477763361e-10	-206476.679353631	0.0141251643655504	51.4304839856031	175.125413760883	88.7705997732461	-0.22536057692308	-0.0146866663544313	0.4	-1.18881355755542	-0.133053821840186	100.914094232009	0.0301168675029067	0.031046270455742	0.0385412896727111	7895184.45	4.92302918519591	-0.382880519924589	-0.00730587017104667	0.0287913258945011	-104.894046417761	0.00724637681159574	0.129527679745716	0.220801605333442	-0.0530201714297358	-0.632742698392319	-88126421.2149343	-0.242478976230998	-4.07298303812545	-0.0480223372318035	1.64812045940171	1.67232585470086	1.63924536866981	1.66725264915746	1
2004-10-15	0.082075765669515	16.7398682872319	247159238	0.950704225352101	40.0792322744114	-0.230095324314803	0.131565252997792	0.19043839865672	-8095526.69645174	93.2416333771947	-3.29632727168936e-10	-238255.806512633	-0.0038344827507466	44.2864051530727	182.851541934444	93.3025582946635	-0.23092503561253	-0.013477225794889	0.5	-0.592376634011683	-0.135679468672129	101.243280694197	0.0258740266101785	0.0300118216866293	-0.0231867831829047	7995446.75	1.57774107104861	-1.09373600771968	-0.0098706909501722	0.0257469380374274	-106.798746930828	0.0492957746478986	0.102783711379777	0.181462307348887	-0.0545734805584432	-0.988678205302396	-89065745.4371559	-0.307599466335087	-3.00024543592678	0.00350770445915699	1.63087063746439	1.65285024928775	1.62254264487769	1.65304983972764	0
2004-10-18	0.0826719576719572	17.2871156373442	241988147	0.943037974683531	36.8511808317158	-0.233943819593413	0.0349699320657596	0.197665596485139	-7833596.08526364	91.0751362895343	-4.49081255387314e-10	-88949.7585024865	-0.0287318684253761	36.8605366508888	188.491533010596	92.2207846967965	-0.32830306267806	-0.0211668100642862	0.5	-0.559248084239732	-0.19209284143896	101.68267004459	0.0191753287490846	0.0278445230991203	-0.0904859788978474	8167765.15	0.0682307315078825	-0.71707846667349	-0.0106462243367254	0.026031592163538	-122.504584752425	0.0569620253164689	0.0875098160253409	0.150144810241038	-0.0377601724060538	-1.44759849693475	-91134181.8371551	-0.330185841791615	-4.15705730855645	-0.0248163107343959	1.60360478988604	1.63754798789174	1.59842375874087	1.63434732095302	1
2004-10-19	0.0755176536426529	17.7952738910198	245544183	0.893939393939398	38.7486018696243	-0.255790218888378	0.101836653461359	0.206324630239025	-7565151.48920792	92.1107483544542	1.86116903999453e-10	-75975.8585959845	-0.0452290616553419	19.4902645666562	193.630384161873	94.7738779023589	-0.21979611823362	-0.022752170921141	0.6	-0.576885488004375	-0.131489449906662	101.909491503555	0.0110657565617234	0.0244887697916409	-0.153687273668202	8180757.8	-3.35348553320535	-1.95991872983787	-0.010444677352267	0.0261821447323117	-105.485743123898	0.106060606060602	0.0936934127037612	0.131327677728613	0.0184248826540585	-1.72768396435179	-93192939.5213664	-0.307667240280443	-2.06152981967705	0.00893383081344651	1.58969364316239	1.62586262464388	1.58698155022421	1.62157455954172	0
2004-10-20	0.07174177096052	19.0424510283032	240680188	0.911564625850345	35.1128121879539	-0.290195856857906	0.0443689876945911	0.227517331601415	-6910037.74704468	89.9979245775885	-9.23040437638316e-10	-83527.7276976613	-0.0555019084666504	20.9985307365574	195.759268115509	91.30687796071	-0.18362713675214	-0.0329665993392487	0.6	-0.239223461506042	-0.114078940057849	102.298488187116	0.000583750632912272	0.0197077659598952	-0.219560556955545	7899714	-4.28124275199455	-0.713483520121839	-0.0147705691606828	0.0234749926432762	-151.15942028986	0.088435374149655	0.0919407331857258	0.118198696214317	0.0394248071285435	-2.14959611683534	-93696111.4179182	-0.216563308619582	-3.70256715272002	-0.028873801719039	1.56131490384615	1.61278614672365	1.56451485470788	1.60303036029327	0
2004-10-21	0.0784986136548621	21.4673704261527	222157075	0.941176470588222	25.118685103743	-0.334323087117128	-0.21702601233681	0.277863273466303	-9938162.26222064	80.5056549196212	-1.18975994805183e-09	-1731631.77611949	-0.0719991016966162	20.7482164220156	186.589281501825	80.2382715769247	-0.33664975071225	-0.0444874164291017	0.5	-0.194293269888356	-0.223485378796423	103.58210713358	-0.0191507763169341	0.0119360575045294	-0.320101366547221	8499923.85	11.8930045016714	0.335713159992711	-0.0194127448939724	0.0347647573591574	-227.465385702176	0.0588235294117782	0.0809016652610766	0.105766352563237	0.0311722906567561	-3.34059978465409	-106636916.39052	0.219301930362671	-11.8575478421769	-0.122560757610577	1.51346055911681	1.58079050925926	1.49111024145767	1.55598866114127	0
2004-10-22	0.0767100376475364	24.1445157207978	210520827	0.873015873015863	23.1997690715384	-0.360010720531965	-0.12852609036421	0.344878689522512	-9692295.27077208	78.775682978244	-1.25462683838517e-09	-1898554.81965582	-0.089780400777995	20.4788221747593	180.960335734283	76.9043230303391	-0.35334312678062	-0.0604236484025306	0.4	-0.210665635996723	-0.240928802193117	104.828143047754	-0.0440018096311476	0.000748484077393956	-0.445007572744704	8611084.1	15.0242944597654	0.433750098076576	-0.0186952077652862	0.0342913613410461	-231.706687322487	0.126984126984137	0.0962624858354301	0.102598396987301	0.0835906635316877	-4.51193828164127	-104650239.902714	0.248047443544036	-12.2094975724327	-0.0358178786124561	1.45503374287749	1.54295219017094	1.42640786633741	1.5089003802241	1
2004-10-25	0.0784986136548629	25.9507786508137	217638603	0.83068783068783	26.0623036029641	-0.472578238896963	-0.00782369427597021	0.377744935035147	-10117075.7181108	81.3999095192719	6.16629923704256e-10	-195971.899483641	-0.106224089597485	27.4258718306979	175.588860066281	80.7552802469906	-0.34499643874644	-0.0691188660600564	0.4	-0.300619212289013	-0.232307317600183	105.584064701652	-0.0618048015924602	-0.0117621730565769	-0.571335022605257	8336013.3	12.714447967762	0.0736846365128407	-0.0165359826653756	0.0355996949842855	-148.429319371728	0.16931216931217	0.120612380327677	0.10860305810076	0.144631024781511	-5.2968601044691	-109659045.236047	0.212157793816757	-7.89888319011366	0.0170153862142676	1.40884873575499	1.50622676282051	1.39069222784317	1.47442048397512	1
2004-10-26	0.0792935363247864	27.7870295100492	221945541	0.798941798941791	28.2231241777404	-0.454133726380515	0.0815809263776914	0.403891916769916	-8495112.93933426	83.6505107535148	-4.96050984472452e-10	115161.808894223	-0.124558267587112	28.8868261409814	169.347196805024	80.4077219377091	-0.33943198005698	-0.0830656239164733	0.5	-0.402172609559103	-0.226397881623389	105.967232390202	-0.0808065443364978	-0.0255710473125611	-0.685903961734413	8021726.75	7.8383697681707	-0.585990480549489	-0.0143316786871634	0.0364339357290902	-122.728364422383	0.201058201058209	0.147427653904521	0.121544590035347	0.199193781642869	-5.78691879301528	-106475656.279526	0.195251064784678	-4.34920563824026	0.012574194007656	1.36322017450143	1.47645690883191	1.37244626086981	1.44924481905657	1
2004-10-27	0.0812808429995928	29.492119593625	226759449	0.793650793650785	28.597664552664	-0.322688570749847	0.127465381951688	0.410560941879432	-5906843.78149594	85.1072046377342	3.05521423356736e-11	42645.3659188145	-0.141768852956751	29.2300749735657	171.442640195254	84.53899992292	-0.34777866809116	-0.0882647602663689	0.5	-0.352715770345312	-0.230938101944726	106.144302645561	-0.103269020325516	-0.041110641915152	-0.784030111505796	7000251.6	4.31090671055578	0.337230328162157	-0.0147850109013965	0.0361674561592036	-98.2096687643297	0.206349206349215	0.167068171386086	0.13671911715226	0.227766279853737	-6.10742652290902	-102168475.437421	0.221511731452086	-1.50117144869259	0.0020804126306328	1.32705119301995	1.44418304843305	1.36120969266914	1.42915240764043	1
2004-10-28	0.0786973443223443	30.5492168286112	232345192	0.788359788359778	28.9966687807767	-0.407364563467724	0.162458276059287	0.408034892402385	-4569920.44770882	86.7650139912609	2.59147193791006e-10	14467.1070935761	-0.151881186536633	34.801499357076	173.700123380384	84.4180595544146	-0.29213408119658	-0.070473634504535	0.6	-0.317853686965271	-0.19701613583132	106.158690144237	-0.12421763118805	-0.0577320397697316	-0.863462618853061	6783146.4	2.29819640562876	0.194365306364942	-0.0151142085357604	0.0359774586487356	-72.8735632183913	0.211640211640222	0.181925518137464	0.151787917480661	0.24220071945107	-6.28759918895456	-103154194.790361	0.0790037971722666	0.906857285352397	0.00207609349794269	1.326494747151	1.41997765313391	1.35464605698361	1.41321902181718	1
2004-10-29	0.0838643416768414	29.5669278490961	248040225	0.650306748466269	35.586517782933	-0.35836630504925	0.255031870278408	0.38959422110275	-5637069.30153172	90.9865416617681	7.0577009817496e-10	378941.450765603	-0.161975685313023	38.9574939151232	171.316058552489	89.5903263606415	-0.27265847578348	-0.0409620667098787	0.6	-0.483532058562248	-0.179253780067843	105.739667439289	-0.143554810445774	-0.0748965939049401	-0.913630324117409	6905855.95	11.5857599561032	0.730366494606933	-0.0130703242057377	0.0380610049478607	-31.9702602230508	0.349693251533731	0.23784809593622	0.180474643632514	0.352595000543632	-6.10538172952952	-109965246.846965	0.335735442518659	3.88478250112795	0.0346496842173257	1.34485746082621	1.39994560185185	1.36603626614672	1.40878223320913	1
2004-11-01	0.0858516483516479	28.7085143841683	254628383	0.60126582278481	37.7813646855954	-0.291460968493602	0.305848183907544	0.380967722560804	-4736675.01472567	92.9869648402568	-4.699826644517e-10	426160.341268196	-0.16301010391555	38.9644947484877	170.616571052364	89.8607912971466	-0.17806267806268	-0.017157772219168	0.7	-0.714233240006784	-0.119283251958075	105.215344849602	-0.165470849572124	-0.093011445038377	-0.936132170903081	6858206.25	9.05910215096521	0.165351774978022	-0.00997289644303223	0.0382236228639798	-34.3374485596719	0.39873417721519	0.291476789695877	0.217475358986968	0.439479651113693	-5.80387529124059	-107082927.721965	0.27681957271815	3.73026515880115	0.0119481908779648	1.36210728276353	1.38547800925926	1.37919419761158	1.40818729272407	0
2004-11-02	0.0876402243589743	27.9114161667353	250782732	0.685897435897433	34.801561035442	-0.279158768714083	0.261395271437657	0.37758625124812	-4415807.73525165	91.3601335035519	-8.85663326114911e-11	-19907.0818865583	-0.163580817627289	35.3526460381803	170.043533548468	89.9299499488488	-0.22257834757835	0.00183010877385639	0.6	-0.449193482866555	-0.150895434258591	105.001473207954	-0.18677112774442	-0.111763381579586	-0.946009028675387	6719880.7	4.0434223717898	0.205964848453927	-0.0131688926126388	0.0376584973755496	-37.2469380687022	0.314102564102567	0.299018714498107	0.244656477490681	0.407743188512958	-5.72078547761117	-108830950.903783	0.259583969656873	0.272197327296771	-0.028104477841359	1.36822818732194	1.36572418091168	1.37498241497942	1.40061848490426	1
2004-11-03	0.085056725681725	27.232343445304	254016072	0.635714285714278	35.5831815003455	-0.243685336738457	0.293815311412137	0.375330040497992	-3733241.09075211	92.5932747219856	-1.83145357336463e-10	-65900.4880030221	-0.161618989243185	36.8573135012269	179.960708465097	102.069647581734	-0.17806267806268	0.0174027754690982	0.7	-0.662930683967643	-0.122015514806345	104.718741905355	-0.206860958264189	-0.130782896916506	-0.943198766713982	6494618.9	-0.921410662743127	-0.68570010208572	-0.00952893693936358	0.036596470050792	-35.7046979865774	0.364285714285722	0.320774381093978	0.270029112025114	0.422264919231708	-5.56374991221288	-108260361.492018	0.116273235329436	0.237123813774153	0.00406360871785011	1.37490553774929	1.35097836538462	1.37402937945447	1.3954375437225	0
2004-11-04	0.0868453016890508	26.8510636942345	250345155	0.742647058823521	32.2520573575669	-0.270209912246379	0.236468086484141	0.371049086932557	-3992711.82704845	90.6186033687707	-1.70803319786491e-10	-72710.770566237	-0.162385885793335	37.3367325762486	186.059801102023	102.359633713458	-0.23648949430199	0.0166269900722745	0.7	-0.508817137315102	-0.16393019105981	104.732010297521	-0.233324069955898	-0.151291131524385	-0.939977326405461	6506369.75	-4.5693931986396	-0.141041327371155	-0.0120972777330766	0.0368714056583375	-47.027923693671	0.257352941176479	0.299633901121479	0.279897375057235	0.339106953249965	-5.63248837653449	-111387438.936462	-0.179073882730797	-2.88326740361348	-0.0329808454400185	1.37212330840456	1.34930902777778	1.35855546593261	1.38310483375275	1
2004-11-05	0.0844605336792829	26.4970182110985	252508368	0.733333333333323	32.6762654429932	-0.314953155960543	0.26296067945832	0.363725360636197	-4182121.29938243	91.8904487719573	-2.25437998005871e-10	-78697.3866519759	-0.157071114352761	38.8011159278508	192.29720412883	100.843572105406	-0.18919159544159	0.00572627527258844	0.8	-0.623294559991123	-0.13296291080785	104.643507902617	-0.250260940204743	-0.171085093260456	-0.933106250935611	6384577.35	-9.67447655162682	-0.871489074938896	-0.0101968070942249	0.0368680427887528	-46.6989843028632	0.266666666666677	0.288644822969878	0.282813191028116	0.300308086853402	-5.61327268512475	-113069937.936462	-0.260649360179704	-2.54751602432386	0.00209347853292047	1.3604379451567	1.35264770299145	1.34916693336628	1.37352029456745	0
2004-11-08	0.0844605336792836	26.6138872081004	249621597	0.775000000000006	30.8066410246455	-0.277226233275399	0.233136204765278	0.34098239862677	-4112992.69319278	91.3635982243228	-6.97183127076941e-10	-33133.1881009682	-0.141911531384685	35.0345644921486	196.345972441532	97.7091639904699	-0.03895121082622	-0.00809508111985374	0.7	-0.469768390761389	-0.0294031324873257	104.673153400343	-0.261614621442555	-0.189190998896876	-0.927345964987625	6150875.6	-12.958316326044	-0.208507864894795	-0.0121821967514793	0.036502867539143	-85.1248642779624	0.224999999999994	0.267429881979917	0.277685421345383	0.246918803248984	-5.68383330043691	-113935969.236463	-0.260445428481299	-3.39734026719102	-0.0190009792900523	1.34040589387464	1.35125658831909	1.3345612236212	1.36112565994265	0
2004-11-09	0.0812808429995929	26.753756633815	247189651	0.747572815533954	30.597159732611	-0.249679887532959	0.248682289258471	0.325782604504034	-3664173.6838256	92.237585795561	-1.86203479604591e-10	-39525.5812077062	-0.126038556276935	36.2160604257742	199.304011685725	97.2982749061314	0.00556445868945987	-0.0152984011402063	0.6	-0.564472427941074	0.00428106626031494	104.636844424655	-0.270596819091835	-0.205472162935868	-0.920383024421512	5993268.25	-16.3993477609149	-0.69316835679277	-0.0103015159284984	0.0362772178911168	-103.003003003006	0.252427184466046	0.262428982808627	0.272599941833131	0.242087064759618	-5.69767819327248	-113748896.467231	-0.283545393617288	-2.36353678264913	-0.00213367986481544	1.32760763888889	1.34791791310541	1.32389667400958	1.35047873536878	1
2004-11-10	0.0731328856328858	25.722847565185	252644207	0.47368421052631	40.9714609912138	-0.22490385909075	0.417522504242676	0.293272696434554	-1961794.09760551	97.9793919800551	5.61981002699918e-10	178726.793425036	-0.109880224313314	49.284589264059	204.72409353045	102.073939906446	0.05008012820513	-0.0180303310757905	0.6	5.24049089107446	0.0372579658621443	104.063992022095	-0.271397460993821	-0.218657222547459	-0.89407928293842	6109504.65	-14.2485153672624	-1.22256808089046	0.00159925783930101	0.0246219628039071	5.99828620394273	0.52631578947369	0.350391251696981	0.298530378454414	0.454112998182114	-5.26031271061896	-109616657.073292	-0.163143623807983	2.60593627112403	0.0499922858160969	1.32705119301994	1.35097836538462	1.33904480902633	1.35390825240351	0
2004-11-11	0.0679658882783879	24.4783975328764	245072703	0.636363636363645	39.9009328372893	-0.227432684827595	0.409526719141046	0.263022138814821	-2771332.75058615	97.9730030009509	2.30030919682697e-10	139978.587962943	-0.0967894785502932	61.6227965914351	215.082844874371	97.7963597979358	0.0222578347578299	-0.0146084706156708	0.5	2.57870520867206	0.0165233598258658	103.647314341991	-0.274062673834315	-0.22973831280483	-0.856987016020783	6167144.8	-9.15692403629538	-0.429733326860532	0.00353188659911799	0.022481510895151	56.769011529983	0.363636363636355	0.354806289010106	0.317289015306311	0.429840836417694	-4.92255533851722	-116178627.206625	-0.157943857950337	1.94915199302352	-0.0081604120286225	1.33317209757835	1.35264770299145	1.34543392657786	1.35469078136304	0
2004-11-12	0.0639912749287743	23.6047285349774	241475520	0.701298701298678	38.5451773003938	-0.234269693014787	0.390142276059368	0.229851480762769	-3242695.01079667	97.8334557073146	-2.13038706271111e-10	-67151.7914774716	-0.0840197592501253	54.8429115433991	225.435301271302	95.6450652825305	0.00556445868946009	-0.00916334403811889	0.4	4.60527987397329	0.00414788575989966	103.37105421421	-0.278449029079582	-0.23948045605978	-0.815910845503187	6135656	-11.1017663898322	-0.682444277929783	0.0015745136602545	0.0223963850370876	-4.09356725145852	0.298701298701322	0.336104625573845	0.323560885395489	0.361192105930555	-4.68351509759074	-117813710.388443	-0.350438502260585	0.694674968473919	-0.0102950614353333	1.33595432692308	1.34819613603989	1.34505628937099	1.35280173292563	1
2004-11-15	0.0631963522588507	22.2491648351768	244765010	0.592105263157893	42.3427775168101	-0.2238242775064	0.498966956848289	0.196641236307194	-3237673.00523447	100.315924179893	3.17680861501522e-10	16164.0499799743	-0.0699302644915603	60.1690119079842	236.327812754416	100.20359381854	0.02782229344729	0.00309422504399418	0.4	3.91170073052611	0.0205272657259128	102.937618612289	-0.281427884173394	-0.247869941682503	-0.765870202241115	6041575.95	-13.1313420492909	-0.269494673234094	0.0020011741355774	0.0226787972032313	48.50187265917	0.407894736842107	0.360034662663265	0.335718811151415	0.408666365686967	-4.29785763833853	-118179209.277331	-0.366364047757735	2.07393990644659	0.0184554734639558	1.34875258190883	1.34457923789174	1.35315121926727	1.35580888676821	1
2004-11-16	0.0624014295889279	20.7500625014573	249944118	0.460526315789488	46.312572189201	-0.194285006323159	0.686915433733963	0.143676184687483	-2643368.37392624	102.983856120238	1.45725482525326e-10	113231.85151797	-0.0581057897764603	60.5169653314543	248.396575264869	101.824913544518	0.00834668803419003	0.0146468269211796	0.5	2.84619488140318	0.00599194024099353	102.380559343169	-0.277971084952518	-0.253890170336506	-0.70368217736575	6122729.55	-11.5863624858019	0.0731236124191366	0.00330370538126517	0.0232014750563582	96.9034608378899	0.539473684210512	0.419847669845681	0.363761764049503	0.532019481438036	-3.78474383636167	-116984030.508101	-0.372056466883257	2.97329744313145	0.0201143587324065	1.36767174145299	1.34763969017094	1.36782193701389	1.36332788417528	0
2004-11-17	0.06299762159137	19.684221381371	247287199	0.631578947368429	42.2408767397303	-0.211342864675274	0.559718474076084	0.0952462703760468	-2733218.6883492	100.907639346238	-2.03941485934373e-10	23998.3042312085	-0.0513285644495556	54.9972816478087	258.292240466467	102.514805666883	-0.0445156695156701	0.0142573727236996	0.4	6.51297308726321	-0.0321846668738408	102.169333690377	-0.279702599127768	-0.259052656094759	-0.644305034967441	6012375.75	-14.4417173779372	-0.743050277784745	0.00130615616679782	0.0244835393803952	40.0209808549675	0.368421052631571	0.402705464107645	0.376742997402217	0.454630397518499	-3.54926145411478	-119109565.708101	-0.310751048509038	-0.40718763707961	-0.0262284162368696	1.36600240384615	1.34652679843305	1.36554608835114	1.36290361269353	1
2004-11-18	0.0552471255596243	18.7420346841297	250314349	0.245283018867923	46.8831556285205	-0.0937827925220779	0.828133294244011	0.0937032079726189	-1833310.32873091	103.191440857058	-1.22741987044051e-10	2484.32631098636	-0.0387371931843064	44.3455351390396	274.866464763466	104.809964090732	0.02782229344729	0.0145874768521049	0.5	11.440338634022	0.0201549003916903	101.755394336078	-0.272740214228832	-0.261790167721573	-0.579601473209079	5237577.6	-16.0969491777045	-1.64572271004645	0.00054002528172791	0.0234869727211953	65.9592529711307	0.754716981132077	0.520042636449122	0.424509543751185	0.711108821844995	-3.13060423630785	-116460809.458101	-0.327982522211964	1.72527861666463	0.0242350894241721	1.37323620014245	1.3532041488604	1.37515777328822	1.3686268000515	1
2004-11-19	0.0550483948921443	18.3530812798327	265219393	0.126760563380264	54.1576617634301	-0.0600566437296199	1.18942847985093	0.101291096349056	202567.75777407	107.092793106472	3.48997137151977e-10	506695.112179518	-0.0268592140587312	62.5562034241986	290.806085231477	111.509588015406	0.0834668803418799	0.0213328421649109	0.5	3.70469162146919	0.0590520461874615	101.026222939089	-0.262033044561	-0.261838743089459	-0.497929137173636	5401017.4	1.57971822440168	0.816425884127998	0.00281695886433387	0.0260867559751684	216.592702169632	0.873239436619736	0.63777490317266	0.495597996891677	0.922128715734627	-2.41341909839408	-111137579.4581	-0.215917142152537	4.94810459991453	0.0429607545136212	1.39549403490028	1.36572418091168	1.40196857844096	1.38443832526877	0
2004-11-22	0.0534585495522986	17.9919102615569	260746836	0.169014084507035	53.089919164537	-0.0140311498176542	1.02309937116063	0.113557174874927	1017011.72427364	105.979739607217	4.84605123080794e-11	437496.23981707	-0.0114321090382765	68.9691885243295	305.587053756365	111.106980453559	0.11963586182336	0.0220831488601702	0.5	2.45442139470036	0.0862821584268718	100.531333495794	-0.24979530926823	-0.259430056325213	-0.411100824151633	5268756.45	-0.506330558056624	0.151017381450163	0.00438688683172081	0.0247343896283658	175.700147399462	0.830985915492965	0.702178573946095	0.56445818924315	0.977619343351986	-1.8733324500486	-111137579.458101	-0.228272117270384	3.07128929284692	-0.00575073320060815	1.41107451923077	1.3799135505698	1.41706021919806	1.39585744807667	0
2004-11-23	0.0530610882173378	17.2167054535064	257360084	0.323943661971812	49.2553531795959	-0.0597617237246632	0.789686761512332	0.114282972412858	852062.62529783	103.43304711444	-2.57131320584125e-10	-70490.483384525	0.000891740174595146	68.6679219170353	314.278256481689	103.454062657119	0.08624910968661	0.0167133970626821	0.5	3.98076169323211	0.0628151157912019	100.350880046458	-0.241923220499185	-0.255928689160007	-0.332835254447494	5222747.15	-3.7876465388376	0.0463556913204126	0.00258555507895872	0.0256600730777484	101.049868766404	0.676056338028188	0.693471161973459	0.607462513486586	0.865488458947206	-1.60395962417911	-112718063.724767	-0.188328632763198	0.328402448510212	-0.0213735641027495	1.41496964031339	1.39132069088319	1.41691980543878	1.39963590804823	0
2004-11-24	0.0510737815425307	16.0737184514399	254005110	0.478873239436589	45.7005902385139	-0.131168766586063	0.571977771833031	0.110566569535367	-70393.9945002198	101.024083092375	-2.74564039862574e-10	-103163.653512276	0.0144640256318966	68.8635208848569	319.081740678139	102.048449736517	0.0806846509971599	0.0190056685640878	0.4	3.17147429642032	0.0599757058601137	100.402310971485	-0.233586588810556	-0.251460269090117	-0.27140382424421	5149800.45	-6.53968180724721	-0.0899974738497527	0.00335979026870368	0.0246661433245862	47.4333983105929	0.521126760563411	0.63602302817011	0.616982685047761	0.674103714414808	-1.54906691023596	-115678334.901238	-0.260944399229463	-1.70993892476927	-0.0218403892211405	1.4199776531339	1.39299002849003	1.40662468866859	1.39716291660822	1
2004-11-25	0.049483936202685	14.9589576595519	256281873	0.422535211267611	47.1930421447603	-0.121066779017734	0.629914611518783	0.109076096876473	-334784.990581751	101.629145562249	-1.52996164159464e-10	-38669.7354656365	0.0270553968971452	68.6558990588406	326.481507497848	103.932330405295	0.0945957977207901	0.0166479280200313	0.5	2.93539521291394	0.0701066445485034	100.363992794135	-0.21155205447514	-0.243478626167122	-0.220306265586545	4984351.45	-10.5840628823308	0.0511600808791428	0.00378362247764664	0.0246937142503627	31.9305277221099	0.577464788732388	0.616503615024203	0.616822995039908	0.615864854992792	-1.42504536743127	-115222982.301238	-0.269613591821098	-1.34248216900775	0.00799725882357427	1.42053409900285	1.39688514957265	1.40347091661477	1.39716299949893	0
2004-11-26	0.0470991681929164	13.923822638513	254544593	0.450704225352125	46.5047743238605	-0.0714618825694333	0.599157752686656	0.107664376827628	-603215.297759861	101.214147125751	3.56456075090885e-11	7835.44226316825	0.0270910665041291	71.6760020664057	335.986520198077	101.625441250409	0.0222578347578302	0.00434804909203562	0.5	2.34143024965987	0.0161237238178982	100.364070229058	-0.188002219690838	-0.232383344871865	-0.179392116173538	4286463.8	-14.9746273683862	-0.507817904705202	0.00484354502790036	0.0239562504812547	22.5266362252651	0.549295774647875	0.594101001565427	0.609248997215081	0.563805010266119	-1.34341477539119	-116091622.30124	-0.269915414262529	-1.70321800454675	-0.00399063491450824	1.40773584401709	1.40161493945869	1.39951358234907	1.39615134755688	0
2004-11-29	0.0472978988603971	13.5140478664994	252198027	0.6376811594203	42.499778295129	-0.135235612598696	0.3812982664538	0.107334659997871	-1167425.67102295	98.9560614324643	-3.69463127901609e-10	-44005.620103274	0.0247368724432042	71.6362566284534	337.717233119074	97.2121219613484	0	-0.00760647999073005	0.4	3.43304128465262	0	100.567474398926	-0.170544263497218	-0.220015528596936	-0.155283331795109	4074384.2	-17.4973563302803	-0.0357387770556077	0.00328209906968212	0.0251295260830511	-57.8995433790024	0.3623188405797	0.516840281236851	0.578446091889005	0.393628659932545	-1.4553504682006	-118102964.586954	-0.262170666302402	-2.9489295552709	-0.0242841358465207	1.38992957621083	1.4005020477208	1.38574644212635	1.38925331376125	0
2004-11-30	0.0429258241758221	13.4493906380224	249337234	0.865384615384647	42.1738282757107	-0.111945655078778	0.370691284452452	0.108258587455823	-1229738.74338745	98.7934070495786	-2.23230415640112e-10	-43151.7998241605	0.0242731675524153	65.7548699309919	348.387054335177	99.5911475663565	0.01112891737891	-0.0135305960137886	0.3	-40.5474618711225	0.00824451075604704	100.727441072354	-0.155927350504117	-0.207197892978372	-0.143112380440813	4025141.3	-18.4683015042905	-0.64535236362914	-0.0005258606764073	0.0209993615709143	-102.996254681644	0.134615384615353	0.389431982363018	0.515441388713676	0.137413169661703	-1.54353547672496	-117842892.496046	-0.248589949273305	-2.07702110984552	-0.00205055067928628	1.37768776709402	1.3963287037037	1.37564093886296	1.3831036080476	0
2004-12-01	0.0429258241758221	13.8399392371075	245584383	0.933333333333318	38.6613123111467	-0.13608512964513	0.189128647276437	0.112142812160119	-1503226.21420807	96.7294639915693	-2.14515101498608e-10	-61406.7980991754	0.0209915637099141	56.9056491445221	351.760560334224	95.0117129768063	-0.0445156695156699	-0.0199684560337647	0.3	-6.78106441297406	-0.0330489755752852	101.030870786231	-0.145003027136389	-0.194758919809975	-0.14642720374477	4051116.85	-17.2793659280552	-0.701875908918655	-0.00155814590532267	0.0217437915820186	-147.333333333334	0.0666666666666824	0.281843543797573	0.437575440408308	-0.0296202494238973	-1.77300011748637	-119286296.726814	-0.267935752561686	-3.21810890121684	-0.0228380128673765	1.36544595797721	1.39271180555556	1.35870242909003	1.37250757195607	1
2004-12-02	0.0427270935083421	14.2025915076865	247659990	0.833333333333295	41.5222549323403	-0.0733157340806942	0.306419252476157	0.114196341449318	-992641.527329579	97.898579766404	-5.59412267833017e-11	-40102.6628716956	0.0162475059810814	62.1667021836523	365.082898270346	92.1632198392228	-0.0556445868945801	-0.0244466607225548	0.3	24.2845688910833	-0.0406416244583193	101.132825491754	-0.133848948125897	-0.18257692547316	-0.154106655332564	3971351.35	-19.713040681483	-0.549897398124585	7.34743366415737e-05	0.0218985129807137	-131.419457735239	0.166666666666705	0.243451251420617	0.372867377412411	-0.015381000562971	-1.83792716443294	-117210689.726814	-0.28476683741459	-1.46455556463264	0.0125217098493725	1.35431704059829	1.38742556980057	1.35297454793086	1.36687324716633	1
2004-12-03	0.040541056166055	14.0903384730473	249814267	0.800000000000012	42.4852353224554	-0.0521386467266403	0.340237844963927	0.113811528225958	-693525.834758639	98.2448096769821	2.01220551996606e-10	23318.1367966481	0.0148742261122088	61.3390276062556	381.158442651631	93.0792395086959	-0.0139111467236499	-0.023160878972563	0.3	-12.7106333526955	-0.0102739071478298	101.153326646991	-0.12676313982167	-0.171414168342862	-0.161971295211483	3970904.55	-21.4857915647584	-0.423277369140138	-0.000960736264981245	0.021288282940279	-86.1861861861874	0.199999999999987	0.228967500947074	0.324900751923966	0.0371009989932909	-1.83646192611127	-117210689.726815	-0.392848500776606	-0.445503862071637	0.00413930107361987	1.34541390669516	1.37657487535613	1.35101078005457	1.36327506482736	0
2004-12-06	0.0395474028286514	14.1588171519123	247905296	0.866666666666635	41.0299683058936	-0.0514825842544629	0.248227649601075	0.108483478391669	-686835.234043553	97.324545128892	-8.10991903666853e-11	-4628.69758280027	0.012038492357004	55.0066868463337	397.950890768324	94.3045015522866	-0.05842681623931	-0.0182582444770972	0.3	-2.49921763621831	-0.0428048037741973	101.221447614561	-0.122362570113713	-0.161603848697032	-0.171793176239077	3922014.55	-23.443695342337	-0.998068487242294	-0.00300212966356743	0.0204444023001626	-87.9999999999987	0.133333333333365	0.197089445075838	0.28229698297459	0.0266743692783337	-1.88005617423791	-117974278.126815	-0.378569544914191	-0.586602491562302	-0.00829580720219536	1.34096233974359	1.36544595797721	1.34599196234408	1.35830765793567	1
2004-12-07	0.0375600961538443	14.1415651885749	249871960	0.833333333333295	42.0979245920736	-0.0592332661299599	0.251291075040302	0.0994874943986008	-713720.64249292	97.5914541457563	3.93600540136687e-11	-5150.67997684256	0.00499374497772109	59.7222267996471	420.430479757211	96.7882710742893	-0.1140714031339	-0.0147617112181483	0.4	-14.0937705534225	-0.0816090521592431	101.214863627055	-0.114876223497471	-0.15225832365712	-0.180137139129988	3898750.45	-24.826217130673	-0.300828474492569	-0.000855515712760324	0.0194081226036875	-70.0653594771219	0.166666666666705	0.18694851893946	0.250514161629547	0.0598172335592877	-1.86109587742794	-118367610.926814	-0.371847490067274	0.0345776170912339	0.00415650612857549	1.33818011039886	1.35793393874644	1.34450090343356	1.3552551356951	0
2004-12-08	0.0369639041514021	13.9567198830107	247274389	0.899999999999977	40.5174801893965	-0.145755944616298	0.174472321310998	0.100262629420351	-1207706.26097967	96.919173178724	1.93700964568005e-11	-8982.36623041424	-0.00335294305646672	54.116875809685	429.711469227108	95.2207805051689	-0.11685363247863	-0.00976371705023798	0.4	-1.85511930478378	-0.0841886798939513	101.262223996721	-0.109249855549276	-0.143656630035551	-0.189343646917606	3755901.2	-24.1826365197041	-0.153044805233041	-0.00320029468735966	0.0180398718579439	-65.6480505795567	0.100000000000023	0.157965679292981	0.219664667517358	0.0345677028442274	-1.89097646030714	-120565555.619122	-0.348537748952347	-0.485597812640791	-0.00833036093531642	1.33929300213675	1.35236948005698	1.33979722503358	1.35073417797483	1
2004-12-09	0.0375600961538443	13.3428731959063	251602485	0.654545454545452	47.4256146937255	-0.0539514624716828	0.439628579416034	0.100556448233851	-1153475.07971346	99.5238327271948	3.34449518607668e-10	63817.3355145958	-0.0073122694316583	40.1634408679147	428.090067464589	98.2006263547687	-0.05008012820513	-0.00372536564712197	0.4	-0.950511445565801	-0.0359913576019539	101.038366519166	-0.0978497735203927	-0.134495258732519	-0.188343897045196	3593730.8	-19.0329821564797	-1.23657195671099	-0.00439387841934535	0.0149768031652307	-15.8291457286468	0.345454545454548	0.220461968013503	0.219930434349407	0.221525035341697	-1.68082994213657	-120056367.854416	-0.0480932659926113	1.69079541685749	0.0268237581892479	1.34430101495727	1.34930902777778	1.34871776659409	1.35361139101852	0
2004-12-10	0.0379575574888057	12.7728727007378	249331424	0.916666666666648	41.4446348994972	-0.0599564299837925	0.146899526205806	0.102051071516844	-1542730.18241252	96.5529410825771	-3.27211295584128e-10	30881.8178530075	-0.0123060144093778	29.56463097099	425.571571488979	97.5418603161799	-0.0612090455840499	-0.00207652385786331	0.4	-0.668221560490282	-0.0451660754841174	101.127957515358	-0.0907509031487825	-0.125746387615772	-0.19148954124012	3527424.7	-19.905590295501	-0.677713157692953	-0.00616565294756268	0.0165338493992477	-65.8486707566483	0.0833333333333519	0.17475242312012	0.204871097272978	0.114515074814403	-1.74239900749289	-122043546.229416	0.053111619416953	-1.21021659817661	-0.031015107103304	1.3398494480057	1.34263167735043	1.34075364757745	1.348377576205	0
2004-12-14	0.0371626348188829	12.0151659976583	247068608	0.978260869565287	38.9744427058724	-0.0822149342634719	0.058915476834508	0.109307953980396	-2005725.42273739	95.3559180505744	-3.57480949947831e-10	-69424.4499532624	-0.0189940657188234	30.7464261303266	419.236539775065	96.3052219070584	-0.0918135683760699	-0.00271186979233435	0.4	-0.741640883200732	-0.067972964683688	101.304384734112	-0.0837700644450301	-0.117351122981624	-0.201428680856364	3476091	-20.5088532162823	-0.40326129466769	-0.00570520573241046	0.0161703147955194	-125.672514619883	0.0217391304347125	0.123747992224984	0.17783006225698	0.0155838521609922	-1.88699048946218	-123894941.138508	0.00733880838255163	-2.15498941947481	-0.0148096303759963	1.33372854344729	1.33734544159544	1.32895236642865	1.34055434491883	1
2004-12-15	0.0365664428164414	11.1592732597862	249473664	0.717948717948732	43.6267129884337	-0.0829479858580607	0.256487671103326	0.112619541098122	-1664841.33864546	97.42270166844	2.25298707750365e-11	8076.52243590025	-0.0250578989060535	38.9076699834711	419.064895380265	100.420014490164	-0.0612090455840402	-0.00250744896221488	0.5	-2.19435125224282	-0.0449813504791274	101.247525017118	-0.0751860369148516	-0.108918105768269	-0.207580937552942	3337388.4	-20.4694164973587	-0.332870832656273	-0.00279190133998071	0.0167493996224026	-90.9151303770071	0.282051282051268	0.176515755500412	0.17739196000479	0.174763346491655	-1.83174785052341	-122520623.424222	0.0448059301412316	-0.208692437366436	0.0190009792900523	1.33150275997151	1.33484143518519	1.32943153369697	1.33870625824879	1
2004-12-16	0.040541056166055	11.5964013146363	253096238	0.641025641025634	45.1283488831724	-0.0610746338450577	0.322229425014355	0.113591050374753	-1579902.9052287	98.1138771563668	6.41046956667055e-10	45229.6257345202	-0.0280719806961764	47.9857958211327	401.360515145294	99.7926060093553	-0.0194756054131	-0.00229561681103521	0.6	-2.0108285992686	-0.014442947195233	101.128512516173	-0.0717566896746338	-0.101485822549542	-0.208102754846795	3385671.15	-16.9776871600397	0.464430125542375	-0.0029172910620498	0.0166685336531451	-4.20420420421496	0.358974358974366	0.23733528999173	0.197373070000437	0.317259729974316	-1.71835479936313	-123245138.224222	0.258717465804037	0.452324275387549	0.00625426743737373	1.33317209757835	1.33623254985755	1.33253320788725	1.33871176697952	0
2004-12-17	0.04193217083842	12.0023059369972	251036705	0.846153846153895	41.9214793053834	-0.124272272120293	0.202295957978378	0.116055702031348	-1789194.41129181	96.7588505995107	-3.10078066459957e-10	-7802.12506677414	-0.0292847473336222	45.3165310059737	377.376186266364	97.7280897137223	-0.03895121082621	-0.00799034349326078	0.5	-1.4953584075032	-0.0291581603426816	101.168353491793	-0.0694472089435805	-0.0950780998283498	-0.210323549050495	3337290.3	-18.2080015329179	0.170158586337305	-0.0038203851809996	0.0170684047626905	-79.8449612403315	0.153846153846105	0.209505577943188	0.201417239314687	0.22568225520019	-1.74238410009534	-124755462.424222	0.291863067022278	-1.04564436755033	-0.0167657638267349	1.32315607193732	1.33372854344729	1.32718171242816	1.33466939507597	0
2004-12-20	0.0403423254985743	12.02260481239	248034425	0.974358974358968	40.0079174736149	-0.284801907343525	0.130824487472289	0.1078664440373	-2110428.13294032	96.2778190457744	-1.31493666966476e-10	-43802.9513888833	-0.0289993904777526	44.6721278337916	358.491982524603	97.5009061714224	-0.0222578347578302	-0.00801731659367242	0.4	-2.1333970507923	-0.0169433102408117	101.270884191379	-0.0673153805764544	-0.0895255559779707	-0.216402696869966	2742152.1	-16.4723591907392	0.246419017159917	-0.00286147715572286	0.0162031781158918	-164.923402007394	0.0256410256410321	0.14821739384247	0.183683957490615	0.0772842665461791	-1.82515428891074	-126756982.424221	0.227698657912986	-1.30005004335282	-0.0106231627655065	1.31870450498576	1.32927697649573	1.31897699988088	1.32883270047785	1
2004-12-21	0.0411372481684971	11.6067456915561	248034425	0.863636363636331	40.0079174736149	-0.305042879966432	0.130543140840793	0.0941211734598591	-2174237.07160893	96.7953624834553	-2.39861778495796e-11	-20882.5787927241	-0.0306401923990032	45.3229251209959	339.398172993995	97.0964841309751	-0.03895121082621	-0.00590999024074875	0.5	-2.27187753152113	-0.0294650200901841	101.325742383924	-0.0672736977839195	-0.0850751843391605	-0.223705090300286	2639543.95	-16.5241290280578	-0.167168522292201	-0.00271515931740019	0.0162203245412615	-140.587219343696	0.136363636363669	0.144266141349536	0.170544685443589	0.0917090531614307	-1.87038177554404	-127241061.224221	0.269414159695049	-1.02183042465566	0	1.31814805911681	1.32593830128205	1.31350719151603	1.32405722307939	1
2004-12-22	0.0411372481684971	11.4472936281469	251868178	0.61363636363635	46.2660752852514	-0.21038425207991	0.397659697456238	0.0815612473976933	-1149849.00506246	99.3778180280663	9.08603151273360e-11	58665.090533739	-0.0304083399536086	55.5501134889096	336.798539489683	100.20912887351	-0.0139111467236399	-0.00485258635932701	0.5	6.97578492745108	-0.010380556974153	101.138454109986	-0.0670212037181388	-0.0814643882149562	-0.222352831261796	2661894	-12.5304887965294	0.0213284011769765	0.000575893184863975	0.0165507892699657	-52.5082044069365	0.38636363636365	0.224965306354241	0.188684892413806	0.29752613423511	-1.70164866894481	-123918475.290887	0.305779872224564	0.948018965637885	0.0232237641896511	1.31870450498576	1.32510363247863	1.32006216020347	1.32571447298829	0
2004-12-23	0.0421309015059	11.6698565196748	250129768	0.818181818181856	42.3714933029498	-0.193302905909054	0.171558177008209	0.0735143749637056	-1072460.56064907	97.7952220915217	3.33960348536993e-10	36900.1416154645	-0.0293025821371138	55.124089913745	335.325617046359	95.7245298106627	-0.0278222934473	-0.00784273746232049	0.5	-4.75864169331332	-0.0210456971303648	101.147625102326	-0.0659320617051944	-0.0783579229130038	-0.221712094557069	2581065.8	-14.9538043456875	-0.177282738664998	-0.00166573210570241	0.0169180707893601	-42.253521126785	0.181818181818144	0.210582931508875	0.195984238778829	0.239780316968968	-1.70030102026775	-125656885.290887	0.275336387545787	-0.669003651819266	-0.0189609473584072	1.31258360042735	1.32287784900285	1.31608545129424	1.3225176658042	0
2004-12-24	0.0431245548433036	11.1417154677958	248360634	0.954545454545444	39.9566933691537	-0.228093271114875	0.0130136371679377	0.0680788192804703	-1248601.31889272	96.9302993007466	-5.11930478313437e-10	-36531.3585069433	-0.0308007056304296	49.7834241228036	337.228052955454	97.4799130590168	-0.05008012820513	-0.0059577757791425	0.4	-2.31625965514596	-0.0380455589661992	101.247118219974	-0.0687790174013319	-0.0764421418106694	-0.225243249453877	2555684.35	-16.8051870994828	-0.1969650071039	-0.00287352579038128	0.0170739654741711	-126.12612612613	0.0454545454545556	0.155540136157435	0.182502871238364	0.101614665995577	-1.78101792754328	-126881670.36781	-0.0733142419285311	-1.34606460697478	-0.0128433557072589	1.30757558760684	1.31536582977208	1.30786985333196	1.31686693700478	0
2004-12-27	0.0439194775132264	10.9840012319002	245659682	0.875000000000032	37.2867996865916	-0.207192689371429	-0.14100922750368	0.0675760213303676	-1207149.69100231	95.8990950672577	-4.61418351897496e-10	-41067.747284544	-0.0309612188618569	48.8911989281323	341.164131786614	97.4423137743545	-0.05842681623932	-0.00662713122554516	0.4	-1.95818148838273	-0.0449106159667627	101.432455724775	-0.0776134881206245	-0.0766764110726604	-0.235550767424686	2603867.95	-15.4207371137618	0.347039950028073	-0.00336060137467439	0.0173347665962826	-198.962386511032	0.124999999999968	0.145360090771613	0.170121944416114	0.0958363834826108	-1.94309548555823	-126881670.367811	-0.0827924890657871	-2.279978277279	-0.0151954179358799	1.30145468304843	1.3100795940171	1.29590091955274	1.3087025942756	0
2004-12-28	0.0439194775132264	11.0520857174174	243808770	0.932203389830491	35.1205729447439	-0.174177310923425	-0.166607155657669	0.0777640542629483	-1127212.90460688	95.0092029455359	-2.07016652477449e-10	-41750.3227386033	-0.0325306815691397	43.7822399139234	343.216984138385	94.3535204152277	-0.11128917378917	-0.0101211513008601	0.4	-1.31359247107182	-0.0849453607618051	101.661865303288	-0.0864104370949088	-0.0786232162771101	-0.25304096912675	2579085.25	-16.7265334438344	-0.0606602157184923	-0.00459554858348196	0.0173731919216574	-192.891712038728	0.0677966101695092	0.119505597237578	0.153249828689935	0.0520171343328641	-2.15177492596458	-127087327.256699	-0.0960141947342663	-2.97486317177726	-0.0132109866057945	1.29199510327635	1.30507158119658	1.28235717167714	1.29898751821203	0
2004-12-29	0.0431245548433036	11.1153070253977	241751191	0.983050847457622	34.0552350555636	-0.213570229624895	-0.12094547939906	0.0878226834661965	-1355917.39622119	94.7666015072256	0	-24035.9700520786	-0.0313179149316938	44.6099970793589	352.806507687916	93.1417747617177	-0.07790242165242	-0.0172423559005265	0.3	-1.36333890787471	-0.0606017774892471	101.864198015722	-0.092818556551338	-0.0814622843319557	-0.27522768671705	2538924.55	-17.0326033637065	-0.233046728648894	-0.00447794565477792	0.0173517770126231	-157.202614379093	0.016949152542378	0.0853201156725115	0.130606591017461	-0.00525283501738694	-2.34481314565301	-128687666.478921	-0.140922074992947	-2.92414097315654	-0.00667152383074598	1.27474528133903	1.2967248931624	1.27054577708201	1.28952123997198	0
2004-12-30	0.03914994149369	11.8853260990054	238072615	0.951612903225851	31.326328327983	-0.22687291290886	-0.148474409343195	0.104813713691609	-1858412.73574045	93.4306049263694	-2.20950719327384e-10	-49525.5533854276	-0.030658027202495	33.2137642270159	361.161419884679	93.0258220755166	-0.0806846509971502	-0.0216730704545006	0.2	-0.485173109765591	-0.0638035917476549	102.141691999184	-0.098091690816182	-0.084788165628801	-0.304011695590034	2535210.8	-12.1075266649124	-0.162602001672102	-0.00769487148389434	0.0150521601103989	-167.935409457904	0.0483870967741486	0.0730091093730572	0.111407430469326	-0.00378753281948085	-2.6099508649143	-130789709.907494	-0.262782034560199	-3.29544271381657	-0.018011444634404	1.25805190527066	1.285317752849	1.25525223576597	1.27772922418323	1
2004-12-31	0.037560096153845	12.6003438102126	239824758	0.935483870967781	32.0592037187473	-0.29561145555509	-0.031504260428942	0.11723486350353	-2183537.74896392	94.0521117893947	-6.76962844967505e-23	-38501.1365406955	-0.0331370648878628	38.598831944213	367.261926752593	94.2329139952664	-0.10294248575499	-0.0250237922642044	0.3	-0.76419102737846	-0.080535319118598	102.294855325279	-0.103601252294052	-0.0885507829618511	-0.333292684582764	2519037.6	-13.9510113056084	-0.259407512988648	-0.00535123566954315	0.0137168021230891	-127.832783278335	0.0645161290322187	0.0701781159261111	0.0976643256215879	0.0152056965351574	-2.7748514419398	-132103817.157494	-0.295302689539401	-2.03549587415195	0.00226925191910918	1.2452536502849	1.27641461894587	1.24598395133686	1.26858707114603	0
2005-01-04	0.0379575574888064	14.0228998232004	238063926	0.915492957746457	29.6721020909669	-0.300647843382785	-0.0467112366500563	0.132231244297041	-2151802.60686897	93.0557646446724	-5.42918810905371e-10	-14709.202779997	-0.0367575299967093	39.3278019506128	374.224813786112	92.7377435495953	-0.13076477920228	-0.0279926105287336	0.3	-0.764191027378547	-0.10278356484255	102.511813976272	-0.109757089560058	-0.0927920442814925	-0.365281117983218	2499365.35	-15.3576753959285	-0.250823630725042	-0.00543453900086035	0.0137813382128169	-138.148524923706	0.0845070422535428	0.0749544247019217	0.0900943586483658	0.0446745568090334	-2.99790684646587	-132239265.772878	-0.189544891397968	-2.50744346943949	-0.0159939782865788	1.23245539529915	1.26695503917379	1.23331322657975	1.25756610858594	0
2005-01-05	0.0391499414936907	15.9143193245509	234841782	0.865853658536594	27.7638499428883	-0.271786409134264	-0.0315872963055363	0.150123748653743	-1856296.72124659	92.2840511976221	-3.60356340064488e-10	-44040.865384616	-0.0394862549309629	31.7456447243816	372.182038572167	89.3566856942968	-0.12520032051282	-0.029655040163328	0.2	-0.323235736253425	-0.0999335198563529	102.755373917432	-0.114155295031112	-0.0970646944314164	-0.400338178860726	2565024	-11.6704726224567	0.292473788383601	-0.00779182396391266	0.0119471035683426	-139.936102236422	0.134146341463406	0.0946850636224164	0.091624593639716	0.100806003587817	-3.24860739284307	-131917051.372879	-0.0948915027004597	-2.79980174134699	-0.0139157188405374	1.21965714031339	1.25582612179487	1.21930161805222	1.24551379811525	1
2005-01-06	0.035970250814	17.2261108592405	237508195	0.753623188405785	32.4427532533326	-0.260565014936069	0.106305692329484	0.157492519029084	-1566653.70246938	94.0637910387893	2.84501467857281e-10	-4638.51328792737	-0.0415907617430022	29.1697364779459	378.373581977743	92.3432609364272	-0.0945957977207998	-0.0259427760948714	0.2	-0.414691506380736	-0.075394638250309	102.769100848484	-0.116717053511076	-0.100995166247348	-0.429256745218676	2600011.45	-10.3906535585022	-0.306450699398296	-0.00723902918242065	0.0127968173568144	-95.8400864397648	0.246376811594215	0.145248979613016	0.109499388964149	0.216748160910749	-3.30669347927457	-131917051.372878	-0.0897780742527094	-0.799681867360306	0.0139157188405374	1.21186689814815	1.24330608974359	1.21552500438999	1.23868797610621	0
2005-01-07	0.0357715201465193	18.3311717540112	235622044	0.764705882352932	32.0699147825801	-0.231832172969163	0.134109371934867	0.162220119244354	-1442180.18273553	94.3068515324068	5.74562703481601e-11	19631.8651509138	-0.0439271210004357	34.748250548406	384.849362544212	93.3214706566275	-0.09737802706553	-0.0207290141855749	0.2	-0.494427255467306	-0.0777005185484324	102.753056372431	-0.116941577227406	-0.10418444844336	-0.452002616573477	2564440.45	-11.7235922152327	-0.0879410134391865	-0.0062159736981878	0.0125589529680811	-83.3652618135395	0.235294117647068	0.175264025624366	0.131420934517555	0.262950207837989	-3.33500731168105	-132455951.658592	-0.0855883084503548	-0.459586229737237	-0.00230588029812331	1.20797177706553	1.23301184116809	1.21207985216692	1.23259735276341	1
2005-01-10	0.03895121082621	19.8501100470303	238254099	0.647058823529424	38.1897302096376	-0.196954701221282	0.273658553510788	0.159591008257204	-540287.399473369	96.5741733456202	-3.23506922892514e-10	26668.0703013654	-0.0489922051921228	35.3572962940275	400.041230545513	96.5002387887074	-0.10572471509972	-0.0154315994492611	0.3	-1.110837674145	-0.0826244241533813	102.528956095363	-0.116720794604829	-0.106691717675654	-0.461912681544618	2479638.4	-10.30035810408	-0.131607090113079	-0.00414202631770017	0.0140893334363804	-76.0113960113981	0.352941176470576	0.234489742573103	0.165777203869404	0.3719148199805	-3.17843823537441	-129823896.658592	0.0397259622195938	1.33994665254318	0.0182998585847021	1.20797177706553	1.22661271367521	1.21720236227083	1.23166099452981	0
2005-01-12	0.0387524801587293	21.0217906360213	236615430	0.735294117647042	35.5993462950589	-0.1636924928968	0.218966991871547	0.158465326938995	-181483.017270863	95.6901674389303	3.96802045221135e-10	15614.4636974715	-0.052077626196213	41.169294431248	409.09344812114	96.4536967339043	-0.09737802706552	-0.00989930227139277	0.3	-0.884180514293752	-0.077356879637366	102.442608228861	-0.118229136396129	-0.108999201419749	-0.466410941274964	2448018.8	-12.2938411365609	-0.390046009877301	-0.00511346022346626	0.0142497175141085	-58.1227436823106	0.264705882352958	0.244561789166388	0.192038732301732	0.3496079028957	-3.12760126144974	-130057992.23002	0.0327761669081768	0.191861666474169	-0.0136934028423918	1.20852822293447	1.22049180911681	1.2150529103173	1.22785972396262	1
2005-01-13	0.0377588268213257	22.1097797543702	238216204	0.676470588235314	38.5898945317129	-0.11434641806719	0.297737547457958	0.158722012891184	131667.576950714	96.8892990758647	4.83566082824583e-11	-4770.01814013525	-0.0530585403882651	36.373076639847	424.453028206332	97.9918515942266	-0.06955573361824	-0.00206150595557267	0.4	-0.521895436326456	-0.0553637861445309	102.254118050427	-0.117909310760574	-0.110781223287914	-0.462621510681827	2414916.7	-13.9941752906558	-0.873356956693231	-0.00613516100775832	0.0124383318731121	-41.0006101281313	0.323529411764686	0.270884330032487	0.218320598211984	0.376011793673494	-2.98158784027411	-129417682.630021	0.0422425341219848	0.919172459475263	0.00914973778557623	1.21464912749288	1.21715313390313	1.21732958147459	1.22677303302199	0
2005-01-14	0.0369639041514029	23.1824141108306	236611434	0.741379310344826	35.4844659782317	-0.172850320968175	0.224027469836134	0.156822255260631	-67078.1177472472	95.8312457039658	-2.65299081467772e-11	-6719.49285523554	-0.0537184281174636	30.6426638655277	435.856047078448	98.1825371040507	-0.06955573361823	0.000687798830249216	0.4	-0.552233114455208	-0.056235771409878	102.219417095469	-0.119540245874104	-0.112533027805152	-0.457853807373565	2374902.4	-15.290420994078	-0.0799904582269964	-0.00593206755618708	0.0122375358911222	-50.7246376811604	0.258620689655174	0.266796449906716	0.234479215443561	0.331430918833026	-2.95977586013386	-130730676.266384	0.0654043935220048	-0.841285943069713	-0.016067403201227	1.21353623575499	1.21270156695157	1.21235549377509	1.22234290308637	0
2005-01-17	0.0401435948310936	25.4909941414531	233440027	0.93442622950824	27.0975155442399	-0.20577618107567	-0.0681716682398083	0.161190125733632	-756036.786516637	91.0345793190305	-1.30095142866131e-09	-125921.7038929	-0.05589427414347	29.5902834122845	429.572887673932	92.2932910142527	-0.1224180911681	-0.00371252052745622	0.4	-0.355766868592386	-0.102612450403291	102.677564562186	-0.125540094920388	-0.115134441228199	-0.47085163604107	2352344.05	-10.6292704890536	0.58368517667841	-0.00915248417463307	0.0185019311939591	-209.417169107091	0.0655737704917597	0.199722223435064	0.222893551440729	0.153379567423734	-3.36434007453733	-132926265.727923	0.221041155127894	-5.60268619328984	-0.0595876655992077	1.19906864316239	1.20352021011396	1.18585419076933	1.20607175429936	0
2005-01-18	0.0401435948310936	27.8355018579041	230848241	0.881355932203361	26.2943695556869	-0.17173081173989	-0.0259158047915338	0.172855770371212	-969152.897693336	91.0662794910115	-5.01759952897791e-10	-121111.184840187	-0.0581771289904274	29.9889140602616	424.044042950313	93.0903286048088	-0.12241809116809	-0.0125125701752169	0.3	-0.38457054400131	-0.103336059898855	103.045550452006	-0.134502699387392	-0.119008092860038	-0.494829369086602	2378956.7	-8.88388474646198	-0.041257090103489	-0.00860157749444688	0.0184265128968134	-241.076061723342	0.118644067796639	0.172696171555589	0.206161091479016	0.105766331708736	-3.706519319051	-132926265.727923	0.284895843453935	-5.23632985284177	-0.00739513332631003	1.1784801460114	1.19322596153846	1.16540442608744	1.19124141655832	0
2005-01-19	0.0401435948310936	30.0125447374658	229162847	0.983050847457622	24.7165151123095	-0.162499636932936	-0.0231025975678193	0.186260028477684	-1283813.68548734	90.4275044273757	-9.18574544192525e-11	-24883.8725293721	-0.0579631113485251	30.3383772387471	419.680410584725	92.9935034269055	-0.11685363247863	-0.0218658516640638	0.3	-0.384570544001282	-0.100280996107532	103.405232810498	-0.14084971396443	-0.123376417080916	-0.527281566058724	2313112.4	-10.51205072127	-0.0936791262279311	-0.0087245050062435	0.0184647055120447	-181.126993992136	0.016949152542378	0.120780498551185	0.177700893836406	0.00693970798074495	-4.05198009021241	-134274580.927922	0.185170627305631	-5.04760590287333	-0.0149563808430807	1.1578916488604	1.18320993589744	1.14620679094338	1.17607234457595	0
2005-01-20	0.04193217083842	32.5460129440901	225213909	0.957746478873231	21.278758320624	-0.20225956994048	-0.0955373919555772	0.207017452625477	-1994059.00901404	87.8690327382197	-4.58692243241472e-10	-96468.8418135705	-0.0614587328329284	29.0650884999923	409.616314815564	88.2535586281746	-0.1613693019943	-0.0390148457117942	0.3	-0.309417227308922	-0.140950144875692	103.957985659919	-0.148420637786145	-0.128385261221962	-0.573284762511161	2389539.6	-4.07885602046928	0.651916633060241	-0.0109404085340588	0.0199946061249738	-183.542068079643	0.0422535211267692	0.0946048394097134	0.150002209027508	-0.0161898998258763	-4.56833097379128	-136907206.261256	0.109124255907811	-6.69630821181057	-0.0383998968490508	1.12673068019943	1.17068990384615	1.11949722079037	1.15607338746838	1
2005-01-21	0.0520674348799343	31.7042976489499	235251773	0.308641975308666	43.7476628067443	-0.106131927952239	0.379058893087779	0.2005044638062	85065.0324962884	97.668911847681	5.26316762854602e-10	476151.411703152	-0.0590867039685123	49.1493850375354	401.530001325665	97.6914591152972	-0.03060452279203	-0.0409252532047916	0.3	-4.40109326140365	-0.0256619305542075	103.410141317459	-0.148774635953374	-0.132463136168245	-0.591068948960294	2699745.15	15.9471582997593	1.00383862185321	-0.0022088791413925	0.0365676154312582	-71.3625691130816	0.691358024691334	0.29352256783692	0.197842328630646	0.48488304624947	-4.17377432713067	-129649058.445872	0.76557774017586	3.71725301074291	0.0992942360349056	1.12172266737892	1.16762945156695	1.13878723195141	1.15994499961477	1
2005-01-24	0.0558433175620664	29.9412201965423	241710143	0.225000000000006	46.2269703994627	-0.104657710859084	0.469729416688493	0.181173438825662	323375.888042241	99.5246090728224	1.10028606541369e-09	612458.795183399	-0.0536114192965129	54.593061237645	377.771427694643	97.2799850638541	0.00278222934472994	-0.0287064401117129	0.4	-7.61382670930441	0.00233277581918628	102.815664761324	-0.148459350566648	-0.135662379047925	-0.58355598921308	2935743.15	20.2741801591787	1.30453735378659	-0.00135839809728692	0.0368174514973288	43.6260623229476	0.774999999999994	0.454015045224612	0.283233234161968	0.7955786673499	-3.70371628451017	-131801848.445872	0.795737587925582	5.31687710680882	0.0140789875328564	1.13396447649573	1.16651655982906	1.15721169808157	1.16614784156515	0
2005-01-25	0.0572344322344314	28.8516629573875	238209960	0.425000000000005	41.0332435786529	-0.114922574332299	0.279529987319017	0.167570707456413	-150733.043876097	96.3841991199804	-6.30289340900796e-10	-24000.4952368108	-0.0512037208251126	52.6516236908292	354.594214493249	94.9445514728853	-0.05842681623932	-0.017343551782747	0.3	-3.67694372437585	-0.0495765580507221	102.67770504588	-0.149880459037195	-0.138505995045779	-0.571841793880046	3022295.6	17.3530941095329	0.687028828220352	-0.00288798084022578	0.0378956070711747	-21.8434949591967	0.574999999999995	0.494343363483073	0.353603277269003	0.775823535911213	-3.59470163449417	-133828270.182714	0.55133685133111	1.14237021897524	-0.037993615029371	1.13897248931624	1.15872631766382	1.15465611899645	1.16312913597625	0
2005-01-26	0.0576318935693921	27.9840110534054	235672404	0.437500000000009	40.7252707850705	-0.134367888035029	0.282542367860561	0.159052406333427	-646446.931605279	96.6582560090513	-1.00666312065606e-10	-81436.5262197299	-0.0495450841003704	53.5381615403999	323.158283376455	93.8520957413223	-0.05842681623932	-0.0048523190863309	0.3	-5.15889393314042	-0.0496938989223819	102.551038955936	-0.150336180903938	-0.140872032217411	-0.557129701501669	3014125.8	12.891286732023	-0.238845563403617	-0.00207376260801639	0.0377649045494014	-24.0896358543407	0.562499999999991	0.517062242322046	0.40808959895335	0.735007529059436	-3.48858808935009	-134981704.728169	0.55474021611324	0.569326875010953	-0.00242322116978302	1.14676273148148	1.15232719017094	1.15202498982479	1.16015342606811	0
2005-01-27	0.0586255469067957	27.7695732115876	233147389	0.637500000000008	36.0616163866014	-0.157850278959448	0.0832124136227566	0.15952364300948	-1252729.60629712	93.5091610803595	-8.44585253908893e-10	-59731.3980146016	-0.0522738090346235	47.8705947263011	297.22348078188	91.6700227219564	-0.12520032051282	0.011813661012849	0.2	-1.68576424412635	-0.107585834405606	102.765322653499	-0.154181129512905	-0.14353385167651	-0.552698788989525	3047830.95	9.12204672537366	-0.0544871201833192	-0.00584744445350403	0.0386627137465869	-82.6273203236585	0.362499999999992	0.465541494881361	0.427240230929354	0.542144022785375	-3.67211828490587	-136709346.570274	0.599219982848996	-3.25594456684025	-0.0395920768985218	1.15399652777778	1.1403636039886	1.13543234720513	1.14962499623133	1
2005-01-28	0.058426816239315	27.8226624173795	235478667	0.6	37.5066636286561	-0.0987919129408898	0.168172046367623	0.160576923229301	-895164.693359971	94.765256137513	-3.88488037385747e-10	-46472.1415375683	-0.053236888423184	43.3338422771666	293.212635535137	98.0352382379738	-0.10016025641026	0.00829320786665855	0.3	-2.00619882548553	-0.0863485291066893	102.813275352239	-0.159442453979478	-0.146715572137103	-0.550588357617332	3061515.9	5.52630842290439	0.211878370428654	-0.00514204065516748	0.0388221148669006	-93.7815126050395	0.4	0.443694329920907	0.432724930593205	0.465633128576312	-3.72129056348586	-134736726.72412	0.537597394365668	-3.15400740611365	0.00754390245652463	1.14064182692308	1.131182247151	1.12715281480342	1.14252840600745	0
2005-01-31	0.05683697089947	27.9568015988312	233620851	0.737499999999986	34.4336819558842	-0.0820730700710779	0.0597792830213896	0.167158446971355	-894948.611982629	92.7261703799686	-1.24998387246223e-10	-18699.5609642034	-0.0553235604317306	44.2987138538384	288.22825358086	96.0413094113356	-0.14189369658119	-0.0072179873599018	0.3	-1.07274941221429	-0.123441982834156	103.049612938216	-0.164727096463195	-0.150317877002322	-0.557335899830769	2970477.9	1.35575807822923	-0.348363305629903	-0.00842955699608066	0.0386171580786067	-102.99003322259	0.262500000000014	0.383296219947276	0.416248693711229	0.317391272419371	-3.93372026094325	-135665634.72412	0.215874839382978	-4.47079655347044	-0.0279437159418903	1.11782754629629	1.12589601139601	1.11143161893827	1.13115764622573	1
2005-02-01	0.0566382402319893	27.7612714864339	235747636	0.699999999999977	35.9743836406932	-0.0787333357258679	0.136369730670418	0.167370092291334	-1098957.54283082	94.0041917500529	1.65605082678168e-10	-19552.9806022912	-0.0563758138377499	44.6612760998167	283.42425279369	98.2419748260444	-0.1140714031339	-0.0150991239367505	0.4	-1.38594101435042	-0.0996757995032602	103.108330657299	-0.167679069209506	-0.153790115443759	-0.564827439559734	2989210	-1.41021605281124	0.26072712281727	-0.00690608795197949	0.0388176789185182	-77.5827482447294	0.300000000000023	0.355530813298192	0.396009400240217	0.274573639414143	-4.00264091664337	-136810826.647197	0.168637893293459	-2.20829258297354	0.00769878012966863	1.10558573717949	1.12227911324786	1.10373305103957	1.12337187695599	1
2005-02-02	0.0610103149165635	26.0602562973436	241444293	0.31249999999998	49.2462262633152	0.0120692837641365	0.599807444441127	0.163206570266848	445185.556315809	101.600388721666	5.43532821208785e-10	254541.602675395	-0.0484036566768902	49.1078638524135	290.4225760182	110.178142335987	0.0417334401709499	-0.016025077323001	0.5	-6.19136848638355	0.0361769346307602	102.397716797116	-0.162271296736892	-0.155486351702385	-0.544468921591335	3186001.25	5.43365064852342	1.26939224928275	-0.00190202463060754	0.045065321870541	27.3858921161849	0.68750000000002	0.466187208865468	0.4194020031153	0.559757620365803	-3.40878321073139	-131470210.709695	0.423614527151443	5.14726942205615	0.0762650685348127	1.11115019586895	1.12895646367521	1.12735037566931	1.13268335840559	0
2005-02-03	0.0616065069190057	24.300020973112	237303513	0.425000000000005	46.2488329617972	-0.0479960334700686	0.474345398842207	0.161282405314096	137805.247041747	99.614247803662	3.14060254657568e-10	193823.098902678	-0.0416085965464938	54.7845334064372	292.669947879227	97.6369061270981	0.0250400641025601	-0.0148966896695386	0.5	-5.38759528903455	0.0220233308462595	102.034968156283	-0.157921559687878	-0.155973393299484	-0.513830259165027	3231933.05	6.69151324105496	0.947903731755625	-0.00228625397164077	0.0452168849791805	71.9626168224247	0.574999999999995	0.502458139243643	0.447087381824748	0.613199654081434	-3.07909771591217	-135019450.709695	0.283862291178047	2.86301792641586	-0.0215487371108107	1.12060977564103	1.1373031517094	1.13474857072161	1.13574910430025	1
2005-02-04	0.0657798509360993	23.9675846588474	246221485	0.157303370786515	55.6218631038167	0.0115884580860765	0.906288241288076	0.161645510504079	1164316.700541	106.503296660778	5.20800028975647e-10	307929.030893859	-0.0304440095605925	65.0406967028424	296.45084173415	103.02907411587	0.12241809116809	0.00170161439060917	0.5	2.90198744683139	0.104814362098348	101.104219297625	-0.147057853255609	-0.154190285290709	-0.452333151050621	3544511	17.0760210117142	1.03389322848494	0.00685913196228886	0.0460551481090278	153.622350674372	0.842696629213485	0.615870969233591	0.503348577627696	0.840915752445381	-2.22573558333738	-131095543.029695	0.0324623917814153	8.0210279986612	0.0678346504090078	1.1445369480057	1.14258938746439	1.16657558442219	1.15292737839536	0
2005-02-16	0.06597858160358	23.6588937956018	241989786	0.168539325842697	55.2639965674365	0.007019368307785	0.874002007031551	0.166531687847495	1261169.65468693	106.160153677354	3.15544187299522e-10	353884.950643246	-0.0162475059810763	70.3998846182148	302.837168990384	106.77680511047	0.1613693019943	0.0239351212423369	0.4	2.7590121160048	0.140950144875692	100.434336803487	-0.135531693055583	-0.150458566843684	-0.374774440159564	3661788.4	15.3928066659706	0.490256353909581	0.00722386794149293	0.0459539183157026	151.391254968768	0.831460674157303	0.687734204208162	0.564810453154518	0.933581706315449	-1.55422139041641	-131941882.829697	-0.0623106370475023	5.96466606760172	-0.00226411407170693	1.17402857905983	1.14592806267806	1.18686618377434	1.16647647004686	0
2005-02-17	0.0665747736060221	23.237189221471	238961795	0.202247191011245	54.1386433297978	-0.0382546263624657	0.82079726893379	0.169523284483163	1011961.31939322	105.476331981628	-9.97001658658531e-11	-18523.6266915987	-0.0125557016582623	68.5988521862295	312.400278598384	106.308014812228	0.0417334401709399	0.0394089539665566	0.4	2.56914674966245	0.0348326458966404	100.002356112878	-0.125748231130861	-0.145516499701119	-0.29333206823946	3681585.2	11.6450891602941	0.58589999894785	0.00779851453914494	0.0457063552869608	114.826498422711	0.797752808988755	0.72440707246836	0.618009326259132	0.937202564886815	-1.06949819541057	-132640649.983544	-0.0993109969389893	3.17890863912631	-0.00682326294414584	1.20018153490028	1.15288363603989	1.19761102066437	1.17604451084642	1
2005-02-18	0.0655811202686185	23.0389926865141	242926425	0.157303370786515	55.4415114185533	-0.0460463386928684	0.862337629305106	0.174063858131854	589959.757563323	106.349602657259	1.01528164440837e-10	9424.17173032722	-0.00964862868909022	74.8021863409503	324.483231640281	111.611058380078	0.0361689814814801	0.041343759653765	0.5	1.85320566237409	0.0298410353796368	99.6065186679806	-0.114363149139423	-0.13928582958878	-0.210107702593276	3797883.25	10.3640866307287	0.00396585220900469	0.011141426010403	0.0437964486913725	114.826498422713	0.842696629213485	0.763836924716735	0.666618525744999	0.958273722660206	-0.603732387174394	-133555564.59893	-0.152348301707329	2.07768679623227	0.00908737701585277	1.2113104522792	1.16123032407407	1.20848388438404	1.18589634738768	1
2005-02-21	0.0560420482295464	23.2746411051625	249387286	0.0810810810811011	58.8994594348903	-0.0397796492292113	0.974418217348362	0.184643938560318	597372.038868681	108.812073687722	1.42574683942884e-10	120926.803719281	-0.00240769847139721	73.6085882982201	333.555582091125	113.527933559448	0.11128917378917	0.0457852688752739	0.6	2.58972966794316	0.0924073356972542	99.1071444691252	-0.100215542773449	-0.131471772225714	-0.120835216328785	4040887.6	13.8834002333459	-0.440601751978283	0.00546184589898005	0.0350573336570522	123.148148148144	0.918918918918899	0.815530922784123	0.716255991424707	1.01408078550295	-0.0288009601194128	-132632584.456074	-0.169308825468062	3.38397343368243	0.0245726852882464	1.23356828703703	1.17708903133903	1.22593396779448	1.1995213996109	1
2005-02-22	0.0538560108872593	23.2603343962195	257229858	0.0405405405405505	59.8153868405734	0.0457181722180493	0.974240625640286	0.1951952517146	2074320.66340831	109.217714192288	-3.15847408291048e-11	131595.534800124	0.00479756213931193	60.4262884155112	348.865671066322	117.517915056495	0.12241809116809	0.0389982341599542	0.6	2.74561486083668	0.101428714155999	98.7030783252402	-0.0877982667459503	-0.122737071129761	-0.0305544499118238	4352777.7	18.3535066764265	0.194189877811949	0.00492194660228752	0.0349708621357777	106.402002861227	0.959459459459449	0.863507101675898	0.765339694841771	1.05984191534415	0.473416615494782	-126750655.456074	-0.123910651708707	2.39427383554099	0.00659815728896129	1.24135852920228	1.19294773860399	1.24034958607951	1.2121867492543	0
2005-02-23	0.0530610882173364	23.2975362764728	252109981	0.13513513513512	56.6434489297017	0.0550047155379135	0.845258120546569	0.205688773776217	2157395.03656507	107.003767893722	2.41905815367825e-11	-17126.6011729652	0.0154806094309332	58.4743714806861	360.445096514589	114.827159494998	0.14745815527066	0.0288091729693075	0.6	2.12152070604207	0.125556817527693	98.5666860326065	-0.0776202716489027	-0.113713711233589	0.0485800568554406	4450201.2	16.972619137026	0.380315162482544	0.00648879602759344	0.0333902265702794	84.5977011494249	0.86486486486488	0.863959689405559	0.798213026363034	0.99545301549061	0.729666137363205	-128030624.706074	-0.0720172094735597	0.559692243414781	-0.0154639735268274	1.24581009615384	1.20991933760684	1.2434681297985	1.21900828888742	0
2005-02-24	0.05087505087505	22.9954555073199	247122747	0.189189189189187	54.8534117905401	0.0585235977177187	0.770511588500413	0.208333171314536	2103984.24567153	105.535483363433	-1.1097678774592e-10	-77607.6096754723	0.024861716067649	55.990070964035	368.102449218778	105.447990019509	0.12798254985755	0.0198141456293563	0.5	2.29544321729322	0.1090677924962	98.568388617629	-0.0707934109544548	-0.105129651177763	0.112154737031145	4569973.6	15.4863631018065	0.675680034370469	0.00602558556678843	0.033567835441038	58.0720835999138	0.810810810810813	0.846243396540644	0.814223149755571	0.910283890110791	0.847664528364933	-127577239.796983	-0.0827073479616467	-0.484343721827209	-0.00894512257496807	1.24970521723647	1.22494337606838	1.24183751981818	1.22256610906381	1
2005-02-25	0.0496826668701657	23.1530750919351	252780645	0.17567567567567	55.2342868649738	0.0200256831953846	0.750589146852339	0.209945117024522	697518.704282522	105.17415269207	1.24500797209001e-10	-19880.4726451248	0.0377741137957519	61.8180702021075	373.950970002043	107.986948880197	0.1613693019943	0.0162231578297595	0.5	1.58599133041163	0.139255301685731	98.5756285883642	-0.0629935698970336	-0.0967024349216168	0.162575070057147	4768598.8	15.1963043117316	0.80680544184156	0.00895879021865774	0.0310473942997937	66.3507109004731	0.82432432432433	0.838937039135206	0.822461112882116	0.871888891641387	0.948034090570427	-132364691.950829	-0.22689489449664	-0.557197371040819	0.00224379324764018	1.25193100071225	1.23162072649573	1.24167785627955	1.22598291272535	0
2005-02-28	0.0512725122100114	21.8473572665608	247621867	0.39189189189189	48.2241448304358	0.0139672779846263	0.547549977645915	0.194068703341676	-808889.526641473	100.843933196799	-4.72660781274592e-10	-106952.443353809	0.0473514032708773	59.1220112968359	375.407949828742	97.2861365215176	0.10850694444444	0.00224530370480871	0.5	2.37033679595219	0.0950372930921413	98.9123725756028	-0.0600740694513049	-0.0893767618275544	0.187392761928962	4829090.8	13.9960307809508	0.794283114679635	0.00585644203416685	0.0332858562876439	7.47196324820784	0.60810810810811	0.761994062126174	0.802305429296802	0.681371327784919	0.724048573172942	-135558221.188924	-0.131605467061834	-3.69396880653313	-0.0365192284639208	1.2391327457265	1.23635051638177	1.22673285741524	1.22068472126376	0
2005-03-01	0.05087505087505	20.3307548239766	244258172	0.521126760563361	45.1393382282111	-0.0906666601605646	0.439050022476486	0.18950899734005	-1900669.41866671	98.9801278449843	-2.89961133800964e-10	-152257.512019223	0.0491705532270461	57.7772715651773	375.896586177435	95.6933096844361	0	-0.00866444336441815	0.4	2.18118520283957	0	99.3383867211785	-0.0575931636048421	-0.0830200421830119	0.187602776059959	4495382.35	10.0328766417356	0.593638467854973	0.00649642617388731	0.032674523360053	-51.1789652247639	0.478873239436639	0.667620454562996	0.757410437718867	0.488040488251254	0.393573146505366	-137800684.522257	-0.360314606755501	-4.3789377371099	-0.0187722245573286	1.22021358618234	1.23078605769231	1.20935024658642	1.21230295829376	0
2005-03-02	0.0504775895400886	19.0533752949206	241178324	0.573529411764699	44.3751022736613	-0.0919775780595413	0.420267304382802	0.18961729001985	-2644543.7785297	98.615264171171	-6.91176978485752e-11	-46003.1272257765	0.0520776261962188	54.2601326860813	375.557224517451	95.8920433370812	0.01947560541311	-0.0173300594956186	0.4	2.4237411272667	0.016800097521645	99.7086196419813	-0.0503806909058935	-0.0764921719275883	0.170585050895444	4326456.25	6.23087129508814	0.370268795344526	0.00560600656229069	0.0328079479270606	-88.888888888889	0.426470588235301	0.587237165787098	0.70068601374161	0.360339469878072	0.0923898851877381	-139760587.794983	-0.349288607803465	-3.52079757784766	-0.00474863958916574	1.20407665598291	1.22494337606838	1.19590701980405	1.20443343246568	1
2005-03-03	0.0461055148555143	17.9357389412062	242958300	0.622641509433997	47.2599239198776	-0.0531587587554133	0.49026405749713	0.188444766622198	-2375151.19878721	99.871111083948	-6.52323412788205e-11	6288.06089742959	0.0463348194718416	51.815608972719	381.8978511535	96.3815153620232	-0.0445156695156701	-0.0235445478510626	0.5	7.11065228383843	-0.0368557521144557	99.870568504588	-0.0417968650220526	-0.0695531105464811	0.148797070612217	4240445.9	0.62037656061069	-1.16327963049215	0.000965376965432553	0.0253334744260393	-95.7911321179438	0.377358490566004	0.517277607380066	0.639549878287762	0.272733065564674	-0.034638825804445	-138336606.994984	-0.33614639502738	-1.27410948735105	0.0141788007729071	1.19350418447294	1.2216047008547	1.19250932730526	1.20102988880059	0
2005-03-04	0.0455093228530721	17.0409963567132	240782181	0.773584905660384	43.9844627574259	-0.0514408152306438	0.387573365670598	0.187399505104266	-2286239.69568849	97.92751718751	-5.86931147102362e-11	-9360.94417734967	0.0395040897344616	47.3153800359178	385.308946871176	92.276698068995	-0.0639912749287701	-0.0314143015209098	0.4	6.28327810254206	-0.0535417356164809	100.154637547376	-0.0343013687207725	-0.0625027621813394	0.118183076520495	4222374.05	-3.35384819463655	-0.643341160889792	0.00114727328763082	0.0251697822724623	-123.993558776172	0.226415094339616	0.420323436366583	0.566474397647369	0.12802151380501	-0.282288532653874	-139325751.994983	-0.314388410073881	-2.10686956338664	-0.0189500975737321	1.17792370014245	1.21492735042735	1.18282492072013	1.19419829220955	0
2005-03-07	0.0385537494912493	16.8887621743615	237608764	0.981481481481477	39.5558647357752	-0.063066507671616	0.223761010039926	0.181987091923026	-2747966.23855941	95.0061288716095	-2.92711615019571e-10	-77192.8919604603	0.0312287409142418	37.2569853017718	375.401624230931	89.0392712563961	-0.08903133903133	-0.0320134515362981	0.3	-0.771467788442561	-0.0758344439132099	100.610812565743	-0.0267403961323454	-0.0553502889715406	0.0735792275217362	4254794.15	-4.51238112365447	-1.03325964114911	-0.00591590699937931	0.0167819896912179	-145.950603101664	0.018518518518523	0.286388463750563	0.473112419681767	-0.0870594481118456	-0.698189610479139	-142076046.728316	-0.262006892431137	-3.40858067410938	-0.0291159712408749	1.16456899928775	1.20185087250712	1.16523973228446	1.18253848551929	1
2005-03-08	0.0383550188237686	16.7474018621777	242170684	0.777777777777786	45.0205308795707	-0.0559154454234579	0.343183143030676	0.170588999591446	-2074740.04970171	97.3740969834636	2.20587826280642e-11	16832.6489049127	0.0217941298670508	37.3075439873665	374.853210123858	92.875812807422	-0.06955573361823	-0.0251452408268449	0.3	-1.76420775310502	-0.0582000623103903	100.715126713141	-0.0259675484351163	-0.0494737408642557	0.0324689516143728	4366326.25	-2.46921139894162	0.0751400202772814	-0.00381993991434489	0.0189640568513739	-100.890985324952	0.222222222222214	0.264999716574447	0.403741518645994	-0.012483887568647	-0.812252163378058	-139619628.266778	-0.250129575875899	-0.278879541427246	0.0267217586186724	1.16178676994302	1.19100017806268	1.16371778092468	1.17856310237126	0
2005-03-09	0.0385537494912493	16.6861203773941	237814566	0.888888888888927	42.7501915167308	-0.0578748533021569	0.218281240675387	0.153491561827257	-1925828.26479778	95.7166872427078	-1.24389653555132e-11	33448.5343215671	0.0133404330119118	36.6603861163832	369.58301891541	92.3625377191797	-0.11685363247863	-0.0204437964343576	0.3	-1.53808293343172	-0.097259664304273	100.905904611727	-0.0278223622635787	-0.0451434651441203	-0.00914248204276769	4491241.35	-1.28788887441433	0.363681930464487	-0.00436154340631226	0.0191629462215501	-94.1373534338367	0.111111111111073	0.213703514753322	0.340395517348436	-0.0396804904369062	-1.00599042518934	-140864233.409637	-0.229725202343713	-1.28048951167695	-0.0144869167056363	1.15677875712251	1.18042770655271	1.15713868799537	1.17227535687408	0
2005-03-10	0.0391499414936914	17.3503259624226	233699968	0.953124999999989	38.2494678445868	-0.0710377739104286	-0.00854447205437732	0.14613621754503	-2323509.90972239	92.6149746338451	-2.96305014475605e-10	-110769.567418986	0.00321026462853835	30.2550931921217	366.165558497183	89.2418664386324	-0.1613693019943	-0.0229171007913222	0.3	-0.791966293914457	-0.135985204675556	101.308820851291	-0.0288924451795294	-0.0418932611512021	-0.059451619421047	4590632	-0.842526172987082	0.0371286037708867	-0.00727194154926696	0.0200309637111167	-123.994060876027	0.0468750000000107	0.158094009835552	0.279628348177475	-0.0849746668482947	-1.39432887584865	-143332992.209636	-0.158220070259489	-3.55262117945614	-0.0321273830823214	1.14119827279202	1.16735122863248	1.140696298882	1.16055465937975	0
2005-03-11	0.0375600961538457	18.2604730075049	230073457	0.942028985507284	36.9600945211445	-0.13667691435686	-0.0119427447795397	0.159647339454902	-2366590.12600031	91.9841138063737	-1.53684246130856e-10	-94589.9800792386	-0.0075084522700668	20.4959566753463	374.270579383151	91.6312943174105	-0.15302261396012	-0.0222017172643496	0.2	-0.379021964503291	-0.130617889425495	101.677457185177	-0.0305222669507292	-0.0396190623111076	-0.115078907746102	4487124.7	-1.46963960835697	-0.577491561602676	-0.00976643726519428	0.0177658561348667	-137.866727314081	0.0579710144927165	0.124719678054607	0.227992124803186	-0.0818252154425511	-1.76327409085204	-143735937.876304	-0.180380897695812	-3.27192437342068	-0.0100966582767668	1.12784357193732	1.15288363603989	1.12602506701345	1.14894155827004	0
2005-03-14	0.037361365486365	19.4397497496952	226380112	0.919999999999982	35.6653489210312	-0.10588666688275	0.000106741279479033	0.176612918887446	-2358669.17442285	91.2956811078996	-9.43145050625817e-11	-40731.0363247767	-0.017906142705818	22.3502756205028	381.486542571054	92.420187798943	-0.15302261396011	-0.0203891823472434	0.2	-0.288434913700236	-0.131872408305382	102.015585875724	-0.0294585061136245	-0.037586951071611	-0.173493786192247	4464752.95	-1.81489495455205	-0.753034290295686	-0.0109641354505507	0.0171300043468997	-135.490830636461	0.0800000000000184	0.109813118703077	0.188599122769816	-0.0477588894304005	-2.11388525735733	-144474606.876304	-0.204232267757715	-3.14433626132991	-0.0101996414548551	1.11894043803419	1.14175471866097	1.11253460664145	1.13741649056593	0
2005-03-15	0.0379575574888071	20.8479863938921	222047172	0.962499999999991	32.8748470794672	-0.192937100639843	-0.0289640606508783	0.196902320374344	-2934242.56725582	89.8308850975139	-1.35774049404635e-10	-74800.0133546986	-0.0313714193421686	22.9796437380007	381.251675728138	90.7181321203346	-0.18084490740741	-0.0286094746154084	0.2	-0.279478108790216	-0.157453028333516	102.438992271066	-0.0310447847360482	-0.0362785178044984	-0.237096189882802	4235501.35	-0.762352836225223	-0.166884119882466	-0.0115156789313851	0.0174040248019103	-137.678855325919	0.0375000000000086	0.0857087458020544	0.154302330447229	-0.0514784234882947	-2.54498950422827	-147439250.034198	-0.0966891385923108	-4.3895508342694	-0.0233368267804936	1.09890838675213	1.13034757834758	1.09519427835926	1.12343415078937	0
2005-03-16	0.0377588268213257	22.4490106608237	218846241	0.965116279069759	31.1263784141577	-0.200500575710176	-0.00884925877274536	0.218922697686106	-3202634.37478553	89.109885713702	-2.53921128977941e-10	-80965.7201522454	-0.0415550921360177	24.0588090114246	375.231843686919	88.0330582682506	-0.15302261396011	-0.0361034991181273	0.2	-0.271060823639355	-0.136799843287616	102.857083545927	-0.0314389537164661	-0.035310604986892	-0.3043183185098	4183962.95	-2.24013316705058	-0.443439742468803	-0.0120039365593708	0.017421032963487	-148.751263173089	0.0348837209302414	0.0687670708447834	0.125790577246414	-0.0452799419584773	-2.97926075281509	-148719622.434198	-0.0959221937077144	-4.21268656533443	-0.0158660434180207	1.07887633547008	1.1178275462963	1.078069600815	1.1089588953234	1
2005-03-17	0.0371626348188836	23.5767697686813	221721172	0.906666666666692	33.6595575382433	-0.199386047133008	0.0912476267646573	0.233808057146793	-3155861.61449164	90.6954281936197	8.07755051513304e-11	-10719.7376914174	-0.0505616678994043	18.5754472470192	372.118331518991	90.6737397534526	-0.11963586182337	-0.0341168890664216	0.2	-0.331200193799327	-0.107422335806361	103.033514281238	-0.0315887843641811	-0.0345662408623498	-0.365255795775243	4176309.95	-4.10782290943351	-0.677023771183988	-0.011402836143003	0.018083151682271	-112.699095996555	0.0933333333333078	0.0769558250076249	0.109512326500151	0.011842822022573	-3.21357190687261	-149294608.634199	-0.0835973174883408	-1.85501201260916	0.0106052829239258	1.06830386396011	1.10475106837607	1.07036278824514	1.09913894401103	0
2005-03-18	0.0359702508139993	24.7845415427443	218510149	0.949999999999988	32.3771209750157	-0.213424001936157	0.098410086718285	0.244326797075223	-3344349.64551967	90.4635382995687	-1.80802195904747e-11	-1870.17004985526	-0.0592828868069215	19.5745505405911	371.781968830499	92.3678038632345	-0.12520032051282	-0.0331427146757804	0.2	-0.408514532223522	-0.113278979141121	103.209729566647	-0.0392177070440347	-0.0354965340986868	-0.42092618204651	4138629.6	-4.85089672196178	-0.474110151782025	-0.00959489328443602	0.0166590184518565	-102.556390977439	0.0500000000000122	0.0679705500050873	0.095665067668463	0.012581514678336	-3.44593369533354	-151221222.434198	-0.0177198168332392	-1.91717433210536	-0.0106052829239258	1.05773139245014	1.09278748219373	1.06151527407226	1.08908099886839	1
2005-03-21	0.0355727894790378	25.9060439043742	220351181	0.929824561403491	33.0637365429937	-0.242561409864983	0.144272068929277	0.245737088473398	-3203607.64519134	91.554589497948	-1.05114958983248e-10	-15306.5182068954	-0.0659531033128744	20.3583373788771	368.320479239825	90.1719677442642	-0.13911146723646	-0.0328586453300581	0.3	-0.518797446384507	-0.124795896305638	103.264891501839	-0.0441196130987227	-0.037221149898694	-0.467798341244219	3907638.15	-8.54128134353072	-0.60271378816878	-0.00807613947691769	0.0167441848104935	-93.4532733633169	0.0701754385965087	0.0687055128688945	0.0866785494019401	0.0327594398028031	-3.57376128593453	-151589428.834198	-0.0799302535024442	-0.878331620750094	0.00266188360839031	1.0499411502849	1.08444079415955	1.05654434107192	1.08135763090527	0
2005-03-22	0.0431245548433033	28.4536517626857	215114972	0.968085106382979	23.0026878623762	-0.389612396211386	-0.158334248168995	0.264715392435371	-4216937.00268528	83.0317600401001	-1.41253615373952e-09	-288805.600071237	-0.076725324621955	19.7829551640043	346.704221319456	81.7595491824427	-0.228142806267809	-0.0361046063700997	0.2	-0.27361223872511	-0.21826870278911	104.227068120352	-0.0634116667481526	-0.0424592532685857	-0.539678207965222	3777320	-3.65361838993608	0.53071751809907	-0.0153330233969265	0.0310717773609376	-170.163170163173	0.0319148936170214	0.0564419731182701	0.0765996906407168	0.0161265380733767	-4.45937159348273	-156184469.385218	0.412195418433273	-9.2665720207189	-0.112422904057204	1.02490108618234	1.06190473646724	1.01613399447529	1.05480411642832	0
2005-03-23	0.0459067841880329	31.2107179971322	209149096	0.981818181818184	20.0465293960572	-0.433621779733323	-0.177371149508557	0.304461163733545	-5623941.40580063	79.8781920392615	-9.18639021274402e-10	-440752.604166679	-0.0838592460186973	14.8623915018347	327.316732112599	79.9082837262162	-0.244836182336187	-0.043140390978788	0.2	-0.153248249904954	-0.244183203586232	105.373417574259	-0.0848580161830417	-0.0509390058514769	-0.636790478458571	3819619.95	1.48880399404568	1.20945602036434	-0.0201775583738142	0.0313853008358789	-212.729498164015	0.0181818181818161	0.0436885881394521	0.0656293231402952	-0.000192881862234179	-5.50844719170176	-161156032.718552	0.468153450364867	-11.6201321146244	-0.0550304720379978	0.993183671652422	1.03603000356126	0.972500387342504	1.02397303581898	1
2005-03-24	0.0463042455229944	33.81261698316	214459916	0.924528301886792	22.4321589062936	-0.421727219893156	-0.0431215559795792	0.338158950937659	-5382774.02113084	82.1507821955624	-1.42111390020868e-10	-119834.078970795	-0.0931511786379537	14.2984001226882	307.486641823438	81.7339572797043	-0.264311787749289	-0.0555597276795519	0.3	-0.216436724290744	-0.258411594760141	106.078382312206	-0.103156522937315	-0.0613825092686446	-0.738479207034748	3835799.25	3.95135642703763	0.892203233945104	-0.01793874345345	0.0325881645120843	-181.183388460126	0.0754716981132076	0.0542829581307039	0.0618472014704315	0.0391544714512489	-6.21738919429686	-159930458.872398	0.350732957958893	-8.2580134167543	0.0124933674447643	0.961466257122508	1.01488506054131	0.94712095504695	1.00077104575295	1
2005-03-25	0.0453105921855911	36.2286660416145	214459916	0.924528301886792	22.4321589062936	-0.367573661987243	0.0206585169744119	0.355006498060284	-4675454.53212668	83.4703912528337	1.51846194658352e-11	29551.8384971538	-0.101373023047699	18.6564048178239	292.692918610689	82.5718803317229	-0.247618411680909	-0.0674679132157751	0.4	-0.248738398841034	-0.243924678054504	106.526567212081	-0.120903522816562	-0.073286711978228	-0.83505323280062	3680349.1	0.416506658408226	-0.219148993412837	-0.0158890159267366	0.0327615002244179	-137.878787878787	0.0754716981132076	0.0613458714582052	0.0616800914663561	0.0606774314419034	-6.72849356648907	-159420679.872398	0.320724827925664	-5.70719377551302	0	0.931974626068376	0.994853009259262	0.93020133351658	0.981787599335296	0
2005-03-28	0.0457080535205525	38.6878375665527	211714871	0.947368421052633	20.6460345099817	-0.344818087083991	0.0187429935738721	0.380666127637272	-4139357.31255144	82.1350601659601	-3.15830747469492e-10	-38186.7237580127	-0.107401186627946	9.87461267258742	285.865592710032	81.898033100092	-0.239271723646723	-0.0856679803085848	0.4	-0.0887523548957943	-0.243328337801462	107.051567128769	-0.14177973933889	-0.0869853174503605	-0.929508722756978	3559662.45	-2.09250084607415	-0.507946119270343	-0.0200405237547335	0.0305019988509367	-123.228471560216	0.0526315789473674	0.0584411072879259	0.060600430073546	0.0541224617166858	-7.29820953938188	-160106941.122398	0.269087225749094	-5.73716452564525	-0.0315310428292787	0.89636209045584	0.973151620370373	0.909647488013903	0.961197089821341	1
2005-03-29	0.0447144001831493	40.9713539825669	211714871	0.942307692307692	20.6460345099817	-0.335113015561114	0.0745103926765935	0.402271248130223	-3786882.1936947	83.3410775964917	1.80971725350534e-11	-38186.7237580127	-0.111324843396154	13.8486051414263	279.531302742189	83.2077937331099	-0.228142806267803	-0.0803468341557689	0.5	-0.0943339270081584	-0.233231679524695	107.343307594647	-0.161692145977516	-0.101926683155792	-1.01472904627489	3487718.15	-5.96712581296847	-0.816754551738537	-0.0190132033098828	0.0309461926604282	-100.869433734029	0.0576923076923079	0.0581915074227199	0.059797455856604	0.0549796105549518	-7.68753286071058	-161176279.455731	0.078708557005684	-2.60004412337251	0	0.883007389601139	0.95395423789174	0.895944924345451	0.944350309309924	0
2005-03-30	0.0465029761904753	43.509470431507	207481200	0.955357142857142	17.4273941944397	-0.337843845853674	0.0121678869484306	0.432808537683854	-4005077.11546911	79.3575890498398	-6.8564610889756e-10	-117790.436921295	-0.116496936408792	14.1544746887238	265.781323390999	77.0553917234338	-0.27265847578348	-0.0717548436313349	0.5	-0.0878856814303982	-0.289243237002143	108.052969576261	-0.182855058373285	-0.11811235819929	-1.10477651220544	3545409.3	-3.84721322951382	0.0285283274111077	-0.0213310635422924	0.0331029081619562	-115.858585858586	0.044642857142858	0.053675290662766	0.0577567341253247	0.0455124037376486	-8.39165370323751	-163716482.055731	0.268343070568179	-6.70553646897307	-0.0662111989323038	0.868539797008546	0.930861734330486	0.868261686268287	0.920449382183385	1
2005-03-31	0.048092821530321	45.8662928483799	210889718	0.857142857142856	24.4074981394529	-0.313956280134963	0.128347703047277	0.450491280379551	-3045638.17129496	83.7441738124535	-1.15821834140332e-10	-65632.4035122852	-0.118958139290668	20.3578907978245	260.71805418787	80.8089071235542	-0.217013888888887	-0.060316359695745	0.5	-0.228817871957159	-0.228949033277027	108.133459085963	-0.199179789802383	-0.134325844519909	-1.17977416498496	3626836.4	-3.98010489793189	-0.0619934363222416	-0.0179243028086818	0.0366209441197606	-96.1528915363614	0.142857142857144	0.0834025747275587	0.0663053476594027	0.117597028863871	-8.62269933313	-161109968.291025	0.328865427042388	-2.41410573180517	0.0369573769446229	0.857967325498575	0.909716791310543	0.860007701814186	0.906458536860221	1
2005-04-01	0.0572344322344317	43.8384596956699	217894373	0.499999999999998	42.8525333289066	-0.229626980291566	0.389350374500203	0.439722812965475	-1168627.36309263	95.5195637786997	1.8875000433794e-09	432184.88887776	-0.115587361430707	32.0848722633086	251.323449347166	90.9616306120082	-0.091813568376073	-0.0361745800342569	0.6	-1.32865646258493	-0.0920705264049601	106.861108725122	-0.206116102267727	-0.148683896069473	-1.2015854103719	3868263.2	3.48110111550646	0.640042376549987	-0.00801096134218162	0.0536933579822575	-23.1914561895854	0.500000000000002	0.222268383151706	0.118293026156837	0.430219097141445	-7.79591597848565	-157090903.946763	0.888710316826109	8.97006514530538	0.121012463454046	0.869096242877492	0.900535434472936	0.890674026992933	0.914740016949349	0
2005-04-04	0.0582280855718349	41.9554717681534	212525394	0.630000000000002	38.2174736995267	-0.219395688758266	0.295488941150106	0.431173206666867	-961979.812044531	91.5425116794102	1.42734626553882e-10	245587.277143429	-0.115284169771346	31.9307416378448	258.642614638904	96.4304204707676	-0.153022613960111	-0.0117544633158595	0.5	-1.10474974983969	-0.156714772475052	106.345109344586	-0.212946887519541	-0.161536494359486	-1.20192261776372	3978041.3	5.64663173934274	0.214391464647006	-0.0101208312523226	0.054897326038501	-23.34262084826	0.369999999999998	0.27151225543447	0.169366102582715	0.475804561137981	-7.48448734574793	-159531348.946763	0.933169386791718	3.1282404329206	-0.0540389631461662	0.875773593304843	0.886067841880343	0.894424867710388	0.912410295530431	1
2005-04-05	0.0604141229141224	40.0161484789951	217035690	0.560000000000004	40.8948792034772	-0.25853672484331	0.359979489714368	0.410891931360151	-965041.94082284	94.6687484446467	1.26144450233529e-10	-90519.205729166	-0.114891804094525	39.477812588358	267.545150414164	104.085814063628	-0.122418091168096	0.00188339258569904	0.6	-1.63343048119859	-0.124745984343257	105.64537247039	-0.216041963123452	-0.172437588112279	-1.17835544182581	3975460.1	5.61606782267679	0.34292107829838	-0.00745410415000073	0.0555067267424855	-3.50657482780226	0.439999999999996	0.327674836956312	0.222135680707247	0.538753149454441	-6.99242100520037	-160175676.946763	0.239524125024879	4.30436187318732	0.0213635052078695	0.886346064814814	0.884676727207978	0.903417296659727	0.914045178990062	1
2005-04-06	0.063792544261294	37.8324246995705	222320878	0.440000000000002	45.2732826531699	-0.203575084029292	0.466249409359495	0.383494254882041	-54069.7537076175	99.0618434202929	1.18634343803949e-10	132148.003472225	-0.114089237937392	41.6573833619104	276.333861416194	106.518215893044	-0.0918135683760729	0.0252453015999588	0.7	-2.28354465379005	-0.0918141828656938	104.683825234265	-0.215902709001968	-0.181130612290217	-1.12574082053988	4021913.6	6.92487837024629	0.608879517102855	-0.00562746093177343	0.0565595500643907	29.4012511170689	0.559999999999998	0.405116557970874	0.283129306461789	0.649091060989043	-6.24302840899765	-157239461.391208	0.214753646553196	6.35316045001586	0.0355936850859533	0.914724804131053	0.891632300569801	0.920541166671537	0.921453129481898	1
2005-04-07	0.0719405016280014	36.7641122954761	247362471	0	60.1201704345716	0.109851472284176	0.907777830618036	0.370426509085319	7725260.68031892	115.210374428967	5.81141313100383e-10	2039028.3676104	-0.0972353486375893	63.7140145089341	289.232638987756	123.900124941162	0.175280448717949	0.0569007950845791	0.7	4.71112811949188	0.171768506456509	102.372047873436	-0.20507328464087	-0.185919146760348	-0.999420342413782	5068263.35	33.334406030144	2.05394858445988	0.00678194962843113	0.0722726921543193	193.058406419108	1	0.603411038647249	0.389889883856943	1.03045334822786	-4.27556431158384	-132197868.391208	0.515448371156929	17.2291908730276	0.151159785265	0.968143607549857	0.913055466524217	0.983892027781025	0.955842333212462	1
2005-04-08	0.0822744963369964	37.330133826061	297078872	0	69.8670571925246	0.415410839005765	1.26126625230282	0.421677904952035	25144058.3766342	131.830287436386	5.22370563890741e-10	6238796.05980681	-0.0678257576795206	80.8745168921049	311.202533353911	147.72978437977	0.397858796296297	0.0798872330109483	0.7	2.15589636527164	0.371176962403697	99.2298556580496	-0.180095657989775	-0.184754449006233	-0.769196514860515	7372757.85	57.0307760987243	3.296008594707	0.0176858988483843	0.0824087938966182	286.60755518611	1	0.735607359098166	0.505129042270684	1.19656399275313	-1.32404332900523	-82481467.3912076	0.998456609543587	25.715066393067	0.14437798390919	1.03436066595442	0.951728454415955	1.08362534164509	1.01534226705987	1
2005-04-11	0.0878389550264551	38.7551378539037	352783973	0.192307692307691	71.6710209297028	0.263644638514099	1.16736068182771	0.519576467920548	27125136.1788296	134.465323857362	5.56397226659708e-10	5450378.07297232	-0.0383269927039929	89.8162850370822	303.505047851191	152.534796230083	0.428463319088319	0.10865942299688	0.8	1.43459793373328	0.390691513203366	96.8393451529638	-0.151260910903558	-0.178055741385698	-0.469767480091154	9973345.65	64.7830926427437	2.36447395941492	0.02760443017476	0.0742903779523876	233.968560639326	0.807692307692308	0.759635675296214	0.589964586612527	1.09897785266359	1.2334874832659	-91886224.7028955	1.47918631311154	22.3550363769378	0.032007918244433	1.11894043803419	0.997357015669517	1.16402536427811	1.07161192932974	0
2005-04-12	0.0894288003663006	40.0783558797577	323649099	0.320512820512819	63.4850132202397	0.135715481881656	0.94085768815932	0.566402887660592	18359360.0796283	124.847915089794	-1.84919175835957e-10	-53515.7710670363	-0.013857642313168	77.8934537163086	296.681175173939	152.708308987115	0.344996438746439	0.125360426514084	0.7	1.56541806085129	0.325617196793583	95.8873514666968	-0.133418944603503	-0.169128382029259	-0.174473847661816	11213442.35	59.5937778114323	1.58587997445893	0.0269288244186101	0.0751234532042019	136.56330749354	0.679487179487181	0.732919510026536	0.63761622775053	0.923526074578548	2.526646884721	-117002495.39255	1.55728174660336	8.95384755881155	-0.0650743164097827	1.18293171296296	1.03463888888889	1.1898030859195	1.10247494748839	1
2005-04-13	0.0965831043956048	41.5763868344709	364698600	0.217948717948723	66.7562586126646	0.103602697164442	0.981006892268625	0.622807433938961	11760423.3978783	129.837841644805	1.18800569093509e-10	154610.994257396	0.0171035765486918	83.3500858374165	282.391631579725	155.083870503322	0.439592236467233	0.135160913661853	0.8	1.49082181486579	0.409542062623077	94.8389998347142	-0.11052890799254	-0.157408487221915	0.123254887623592	13105870.85	57.8153200379437	2.04503243097363	0.0298730338633557	0.0753249408781981	122.600715507856	0.782051282051277	0.749296767368116	0.674843074289726	0.898204153524898	3.95864942023114	-121563551.059221	1.358125011705	8.6670324169754	0.0523938230002149	1.25360033831909	1.08416257122507	1.22924606843826	1.13986714494064	0
2005-04-14	0.101750101750102	42.223596076936	344368468	0.33760683760684	60.0025382929804	0.0597150762581051	0.824195157769623	0.649894309950088	4807189.30646826	121.052686447628	-2.79854950922339e-10	578626.257567595	0.0439271210004413	76.3876084103897	267.894811741543	129.224893174832	0.361689814814813	0.121086982685919	0.7	1.82856417904265	0.34814269989981	94.7202636077759	-0.0926099080571066	-0.144448771388954	0.373371715588688	13978630.9	50.1738054893665	2.07644418856588	0.0256192899391484	0.0787455490102424	79.7918253363796	0.66239316239316	0.720328899043131	0.690005015874194	0.780976665381004	4.44497323769946	-132599908.430651	1.30443989536259	-1.55841594837634	-0.0613993627232672	1.27752751068376	1.12283555911681	1.22957391623329	1.15629668437386	1
2005-04-15	0.106320907102157	42.2066399326885	362771089	0.324786324786324	60.4640588728723	0.0807825222913129	0.8116563207778	0.668778568398404	3037824.13143983	120.71729299129	-1.96857526940462e-10	-715082.78940746	0.0743711305610375	71.7001837424507	257.135415893069	137.325628237829	0.42568108974359	0.0923298161039186	0.7	1.67649821837289	0.421115645307525	94.6758923592441	-0.0745711692387754	-0.130473250958918	0.578456118419668	14738210.8	43.1548658811256	1.90269563185295	0.0283209886531784	0.0772874646200267	62.0359884233049	0.675213675213676	0.705290491099979	0.695100174282789	0.725671124734359	4.81953829845552	-127409425.584497	0.571314594416881	-2.55377121436695	0.00676174647541217	1.26862437678063	1.15149252136752	1.23257471077471	1.1712566144618	0
2005-04-18	0.110096789784289	42.0582419124837	352571697	0.410256410256415	55.8382875882807	0.0695291018742569	0.715564653482574	0.678480236345837	1183626.04693682	114.53300245247	-1.92013644739636e-10	-206970.008958775	0.0993398554496339	69.0005111785163	247.149131857222	128.383866600561	0.339431980056977	0.048903699301937	0.7	1.96407644151205	0.338191553360618	95.1055176978766	-0.061344307984599	-0.116647462364054	0.719621102069068	15156128.8	34.5020242626735	1.66750136863265	0.0251119708881277	0.0794560781859594	39.8133748055983	0.589743589743585	0.666774857314515	0.685658401960031	0.629007768023482	4.66305890750944	-130513588.367107	0.485843631794594	-5.6930676027438	-0.0459667150022851	1.24024563746439	1.17959303774929	1.21602704483746	1.17337935964383	1
2005-04-19	0.112680288461538	42.3042656229254	371776265	0.274678111587986	60.9817891463774	0.128771836604986	0.813886954948433	0.690291507155595	4724740.90394315	121.178239113866	2.06775308092498e-10	571133.725071219	0.118833295666231	71.7272989353272	237.47750404097	133.219295183999	0.319956374643873	0.0254479027320775	0.7	1.54809559330141	0.289744647513573	94.9218132137722	-0.0403601742781352	-0.10139000474687	0.841080736622146	15854546.75	30.4361471070045	1.51207870200772	0.0350641223266243	0.0760810054194399	53.2188158574888	0.725321888412014	0.686290534347015	0.685869112755692	0.687133377529659	5.09436453216039	-115352087.314476	0.537437880229618	2.12207967882935	0.0725655576070013	1.24636654202279	1.21464912749288	1.23467238055641	1.19130366734392	0
2005-04-20	0.115263787138787	42.5327162111927	358563723	0.334801762114537	58.2423129256824	0.151056120316863	0.743131875154933	0.684497919809312	6646713.7987214	116.04435392434	-8.49508004112858e-12	634342.269854013	0.140038877018047	68.3879046728765	220.964782098105	111.523795254345	0.336649750712251	-0.00857838064590351	0.6	1.71710089629919	0.317184768055023	95.0972602036003	-0.0222743105543517	-0.0855668659083666	0.926749238540991	16216880.05	24.6717548062997	1.35488893727713	0.0305000508110281	0.0778109360492144	41.4658634538149	0.665198237885463	0.679259768859831	0.683665998123739	0.670447310332015	5.13503208557897	-112162853.038613	0.444621670010497	-0.521406669624024	-0.0265988426047163	1.23245539529914	1.24302786680912	1.23597368699012	1.19989869143731	0
2005-04-22	0.11625744047619	40.7473676949352	333650709	0.694581280788182	46.1489741640699	0.0698184304930291	0.479966073126365	0.662876309465251	-146416.519632742	98.3571526706146	-5.47787217689726e-10	-2473257.78745995	0.150864602737602	63.1395909730411	187.33242858274	82.4361322257229	0.136329237891736	-0.0332114767864521	0.5	5.0728177747689	0.137985106960363	96.5149361394235	-0.0203468844082686	-0.072522869608347	0.918377792322489	17196989.75	24.4189168867168	1.26881538949802	0.0108822445732044	0.0854155832206173	-34.3722540962423	0.305418719211818	0.554646085643827	0.640659360630435	0.382619535670611	3.87682942861418	-135917122.201404	0.286326837537847	-12.0999861717966	-0.15783615588679	1.1979557514245	1.23774163105413	1.17655958881013	1.17405009162146	0
2005-04-25	0.123014283170533	38.2405354060813	317210626	0.804020100502504	43.3176021132081	0.0993754599993995	0.398148329175103	0.648666646437881	640177.011746213	92.9725035325918	-1.18654001437925e-09	-2687226.62788236	0.156964105531817	61.4079476346619	183.553812318071	75.8491668155762	0.050080128205133	-0.0509940149750536	0.4	5.19778175425849	0.0511222225315989	98.0432009980131	-0.0217779864404182	-0.0623738929747613	0.833607647439072	17891549.15	20.6396948559315	1.1190846781872	0.0110699373077026	0.0852681048231674	-108.329263660534	0.195979899497496	0.435090690261716	0.572136470507529	0.160999129770092	2.47154950237705	-123861061.334735	0.109899476761566	-13.8024617011037	-0.0512691993428106	1.15121429843305	1.20991933760684	1.11932940417352	1.14328989949034	1
2005-04-26	0.127386357855107	35.8185819582243	331698086	0.673366834170851	48.0175799876175	0.122689179584743	0.488495370303281	0.620405202484265	3574922.67929146	98.7124705826301	6.66285032570304e-10	89465.8996060779	0.152897770335674	62.4336092455291	185.87169136151	86.7764608308192	-0.0333867521367501	-0.0487475753251479	0.4	3.8594333949052	-0.0305232039412523	98.7165129186961	-0.0177485626533076	-0.0534488269104705	0.731436361363969	18478669.9	16.6441444552873	1.16692066437124	0.0146695169426534	0.0867965128154924	-76.6509718700955	0.326633165829149	0.398938182117527	0.514403707710862	0.168007130930859	1.84184346148677	-114764284.125432	-0.0729712208775146	-5.41521179605012	0.0695143587921484	1.13006935541311	1.18515749643875	1.10528860207009	1.13127482646723	0
2005-04-27	0.129373664529914	33.5158387762551	320718195	0.839195979899497	43.129409076581	0.099850214164517	0.33577332730739	0.593982362164803	1954723.62715593	89.8180189101732	-1.30424611996087e-10	19945.1859085352	0.130443752739429	60.3507363822276	185.619198156749	75.3282852395973	-0.29769853988604	-0.0809183091077748	0.4	14.9373999605322	-0.263987062888168	99.9541518931444	-0.0125309710488124	-0.0452652557381389	0.592102713923803	18931424	11.7508492206303	0.731157317827691	0.00599325203048333	0.0904683608607698	-112.39493768718	0.160804020100503	0.319560128111852	0.449455847844525	0.0597686886465069	0.668635739941625	-123370144.638946	-0.026774550938754	-10.9012650753761	-0.0890858750377254	1.07275543091168	1.15956098646724	1.06532354454246	1.10475093610722	1
2005-04-28	0.128976203194953	31.399707954484	333981560	0.758793969849245	45.9997445240981	0.120550539575145	0.38321805597593	0.551857455046814	3019337.33999474	92.9562264908725	-3.62429660848815e-10	-208837.700042294	0.102229093615315	55.7973023982834	187.991002651391	83.7168191291048	-0.29491631054131	-0.0976862794234314	0.4	-7.00628518887061	-0.251810139422774	100.551856386198	-0.000438132819986059	-0.0362998311545083	0.452966369959662	19382908.7	8.70902260486266	-0.635532439116776	-0.00243581751178878	0.0795327302981295	-107.65950966956	0.241206030150755	0.293442095458153	0.397451263715735	0.0854237589429907	0.0525945663886418	-116984080.009316	0.0187491440413685	-3.35067519812723	0.0441848417098268	1.03102199074074	1.13173869301994	1.05351872936259	1.09114332936097	1
2005-04-29	0.129969856532356	29.982893024092	357608910	0.597989949748741	51.294408626922	0.1194239899754	0.507770467168833	0.497906222096745	4564785.06279781	99.7519681623955	8.45096632790097e-10	1347001.09063392	0.083038845058079	51.6884210305783	187.342476361976	90.3408565271983	-0.12241809116809	-0.0741384641104546	0.5	-2.67120241649966	-0.103824167903032	100.277448917174	0.0167169810568089	-0.0256964687122449	0.351225814822653	20393850.3	10.9541510095646	-0.743929939332183	-0.0073554529599226	0.0706589312116235	-36.3473589973149	0.402010050251259	0.329631413722522	0.37484464705133	0.239204947064905	0.214795715570326	-112399668.815285	0.162259120782563	7.00651427738195	0.0829116551099592	1.04326379985755	1.12060977564103	1.07532596558645	1.09619734911974	0
2005-05-09	0.120430784493284	28.6672791601566	347914999	0.601156069364155	49.4977903997651	0.103153448053546	0.433349415154597	0.468196517087548	4119616.06569105	96.437587941039	-2.31571347904437e-11	903448.54405941	0.057338893226317	38.3468822976539	186.181136185523	92.003274856513	-0.21979611823361	-0.0430475516274539	0.4	-1.63379102412411	-0.183950344556277	100.313525362427	0.0301982767283107	-0.0145175196241338	0.266819366883153	20528313.1	6.21362510645691	-1.74857376618796	-0.0116323831911084	0.0698669835986138	-35.5106621773291	0.398843930635845	0.35270225269363	0.367463848932097	0.323179060216696	0.117062310255034	-114739578.367007	0.0872555655092522	3.57451089676184	-0.02773235365303	1.05995717592593	1.10558573717949	1.07966261547169	1.09476799750563	1
2005-05-10	0.121821899165649	27.6563269388347	358756412	0.473988439306364	53.0404117337831	0.127039466762909	0.531881039772258	0.430971972104192	5911587.22535335	100.755961030726	1.11384449588014e-10	183457.511184546	0.0408773696033353	45.9073341283266	184.60541400148	90.3756566689456	-0.0806846509971499	-0.0258950596286585	0.5	-5.27107614290513	-0.0678346504090078	99.8518085351669	0.0494911141967223	-0.00171579285996258	0.217628233585065	20801934.8	2.80578434037797	-0.98856253782019	-0.0031150172387375	0.0703892675484252	-10.6616362747157	0.526011560693637	0.410472022026965	0.381799906630386	0.467816252820123	0.482600169381264	-106678014.854187	0.156832813989096	6.94551009372257	0.0547163314240019	1.07442476851852	1.10224706196581	1.10295673058987	1.1047274453821	0
2005-05-11	0.117648555148556	26.8135331110037	348069575	0.462585034013598	50.9413368128146	0.114051411158751	0.437575182366359	0.392765322023727	4600487.28617236	97.0017461056939	1.92671866680042e-10	153396.882233777	0.021152076941344	36.6470802256197	180.49253591264	90.1162252836447	-0.12241809116809	0.0126398585177139	0.4	-2.00288170338517	-0.104069956746844	99.7767564166615	0.06473167554166	0.0115737008203619	0.180816482237778	21110761.85	-0.0945511362352439	-1.34576588266622	-0.00903173997304289	0.0686990969410722	4.57401357125014	0.537414965986403	0.452786336680111	0.405462049980295	0.547434910079744	0.521258782371947	-112021433.354187	0.0780390959394812	3.21606242153853	-0.0294735598624239	1.10057772435898	1.08666657763533	1.10735722328973	1.10680576598344	1
2005-05-12	0.114468864468866	26.0309388423035	348069575	0.431654676258991	50.9413368128146	0.0970843633431022	0.408990163017247	0.355152069579143	2575195.1695084	96.3263017051187	-3.89982030773917e-11	-178399.389022424	0.00606383318723513	39.2900683052867	183.768108843583	105.523785779297	-0.0667735042735	0.0388277940739452	0.5	-3.50213443063321	-0.0581032417445588	99.7252801202224	0.0830802388519551	0.0258750084266806	0.153149765276939	21243484.85	-4.00809466831159	-0.940235178704233	-0.00477799604883557	0.0671566881779878	10.2461743180309	0.568345323741009	0.491305999033744	0.434076699664778	0.605764597771676	0.545472984599682	-115991257.354186	0.0201971257264233	1.17694320115169	0	1.1178275462963	1.07442476851852	1.11029088508964	1.10850621011181	0
2005-05-13	0.113475211131463	24.488569970307	336921437	0.553956834532375	47.8312680598032	0.0314561904027874	0.291270981515472	0.353449214130762	569026.463835061	92.4108311386404	-4.0133899250411e-10	-263641.751802889	-0.0207062068540382	41.2043588252325	182.917778985286	106.368120890014	-0.20310274216524	0.0291329885969844	0.5	-2.22974140574043	-0.173968467503969	100.061498882319	0.0940248802420414	0.0395049827897527	0.116537049898024	20548812.1	-5.36454417546812	-0.501220611677567	-0.00828944470306452	0.0677878663385718	-29.4161123429396	0.446043165467625	0.476218387845038	0.448123929058198	0.532407305418718	0.216966719253731	-119270121.471834	-0.0285798290835009	-3.67732433709133	-0.0432996681524091	1.10781152065527	1.07553766025641	1.09648069333611	1.10129786460585	0
2005-05-16	0.113077749796502	22.8573745817862	331475275	0.640287769784168	45.7098490909714	-0.0991795014115548	0.237671701603526	0.362689678542582	-186300.013208807	90.4929571437488	-6.65183014989868e-10	-354556.582198183	-0.0450150440134365	42.4754675496308	180.985081449907	96.1257733886131	-0.20310274216524	0.0169889475080241	0.5	-2.59079103327229	-0.179103708976829	100.579425680032	0.0932127264035676	0.0502465315125157	0.0654165750411329	18335300.15	-9.94112268922311	-0.627416970258311	-0.00731155853476037	0.0673158038329758	-69.0280966437086	0.359712230215832	0.437383001968636	0.444543620028344	0.42306176584922	-0.287179764403955	-118851185.933372	-0.112718118378336	-5.50137805965632	-0.0317340840775762	1.0972390491453	1.07859811253562	1.07614498145485	1.08932980880339	1
2005-05-17	0.112282827126579	21.5067598245104	337569703	0.507462686567154	48.9603174136942	-0.0759929044455764	0.366505576648757	0.336372395420035	346929.916683525	95.4039831019159	3.88664012235728e-10	44733.9409722304	-0.0480826302140354	37.2987952019448	185.605664534088	109.599799926617	0.0222578347578402	0.0041091593243503	0.5	-1.71238741052777	0.0208246474486999	100.599415857611	0.0997396457619609	0.0601451543624048	0.0232803951440763	15854766.5	-13.3823197343002	-1.14777325628935	-0.00961674830987754	0.0647751951099343	-21.0193955796138	0.492537313432847	0.455767772456706	0.448285004171131	0.470733309027856	-0.355835741768651	-115983219.815724	-0.132012122969884	-1.31353467210831	0.0420922005387386	1.08332790242165	1.07887633547009	1.07742639670589	1.08763152124059	1
2005-05-18	0.10950059778185	20.4056932372507	342774347	0.308411214953277	50.5543872362006	0.00791511873966193	0.443944634779012	0.3213204214429	871593.595425084	97.9721745150173	3.33152320960854e-10	193570.82443019	-0.047672429733723	42.5811959324834	192.443439632768	107.023723067696	0.09737802706552	-0.00926941441772372	0.6	-2.64283650356241	0.0924936602768762	100.424944472374	0.10597851204238	0.0693118258983998	-0.00348916332645333	14658255	-16.888225507048	-0.931615226044711	-0.00626978253017332	0.0650596858661393	45.3339575530585	0.691588785046723	0.534374776653379	0.476981594998547	0.649161139963041	-0.242948467711757	-114682058.815725	-0.207630345249843	1.45110359945524	0.0203998134853657	1.08054567307692	1.09056169871795	1.08569995179253	1.09028889228154	1
2005-05-19	0.101551371082622	19.6015726206877	350073753	0.252336448598123	51.7710033084717	0.0395137083873827	0.521304684206853	0.283756069079506	1948745.78536116	100.299271238622	5.51444332027451e-11	118847.917779561	-0.0517922693403416	52.5245281525027	203.959495001843	100	0.0417334401709402	-0.0169851796175562	0.6	4.92298267110058	0.0380106217820607	100.156204658105	0.110453359680584	0.0775401326548367	-0.013736651414209	12970750.25	-18.1799828810091	-1.22759734255819	0.00524130083171425	0.0512174978956525	58.14559386973	0.747663551401877	0.605471034902878	0.519811408299991	0.776790288108653	-0.030209539809567	-111313102.200339	-0.281142876902831	2.94363038929096	0.015031320297333	1.08110211894587	1.09946483262109	1.09678011387308	1.09549826423657	1
2005-05-20	0.0943970670533189	19.074627540838	359954838	0.262626262626253	51.9830608351195	0.0782847802880012	0.553781783051832	0.26269005576585	1720882.56715427	101.040037566859	1.55112361150768e-10	74671.5870392812	-0.0468520287730976	61.1522376437952	214.708670585224	103.067688171379	0.13632923789174	-0.00739090675028725	0.6	2.78543956429584	0.129579896281227	99.9343554355761	0.102813017965071	0.0825947097168836	-0.0123561442997633	12448297.9	-17.101695558497	-0.509100114733084	0.008988700480559	0.0487252353634	80.0531914893621	0.737373737373748	0.649438602393168	0.563020472997717	0.822274861184071	0.156474468679835	-113109663.109429	-0.384210531779181	3.11162071293376	0.00248339946144124	1.09167459045584	1.09974305555556	1.10509429837503	1.10026633753518	0
2005-05-23	0.0908199150386676	17.9685897142847	351691038	0.515151515151529	46.4807708147024	0.0252733527307165	0.328955366347379	0.245129149808986	-757619.44265911	95.5771675983154	-3.18482059472526e-10	-273651.613414819	-0.0427500239699716	53.7116684725098	218.94992728117	91.5289936119122	0.0222578347578299	-0.00101632717409478	0.6	-18.6837743443956	0.0213812390571386	100.321658737969	0.0771408599975629	0.0815039397730195	-0.0269692926288312	11941356.85	-17.3385598963781	-0.56139891749199	-0.000582400443762145	0.0485585534750057	-26.0555555555611	0.484848484848471	0.594575229878269	0.573538725291234	0.636648239052339	-0.204825975305456	-121373463.109429	-0.37516039281944	-3.03413060872826	-0.0640138155142619	1.09501326566952	1.09612615740741	1.08745184350358	1.09152099139436	1
2005-05-24	0.0898262617012642	17.1824504364541	358684638	0.313131313131315	50.9534218373666	0.0554874400605648	0.556724184538799	0.234034226058353	-577376.007279515	100.976354351079	3.54188978571907e-11	-92819.3442842023	-0.0369358780316271	60.0965279734116	227.162548349713	99.2521948977117	-0.01112891737892	0.00783671228098095	0.6	2.54232444934515	-0.00999573391836824	100.161369250737	0.054513571621682	0.076105866142752	-0.0318511600305493	11781067.25	-18.4271223362204	-0.451070063764941	0.0092832200871594	0.0438385327337552	3.489689553596	0.686868686868686	0.625339715541741	0.590805722041403	0.694407702542418	-0.0805304763471404	-117439563.10943	-0.342360077807943	0.972086622243442	0.0515346821344524	1.10057772435897	1.09195281339032	1.09423840255414	1.09448290580543	1
2005-05-25	0.0826719576719603	16.6266004894695	364211408	0.422535211267604	51.1731413544381	-0.0149391453407019	0.609790729433766	0.199361580496798	-776889.623029321	101.979949888005	3.02529837022544e-10	202266.36229079	-0.0268413792552378	67.4916015185952	235.477763154079	99.5014632651411	0.0222578347578299	0.00984415819180361	0.7	3.25210834797808	0.0202449358122217	100.018504895642	0.0402613907890697	0.0689369710720155	-0.0294870188027541	11097177.35	-20.4616449545116	-0.875402165212613	0.0062357869062873	0.0426174425492928	52.2388059701425	0.577464788732396	0.609381406605293	0.596997616896033	0.634148986023813	0.0378443577951248	-118667734.22054	-0.344255683172151	0.757242937831426	0.00250831607755989	1.10224706196581	1.09139636752137	1.0996901850361	1.09741215020444	0
2005-05-26	0.0711455789580817	16.1104541101266	359842422	0.406250000000028	50.4430665827178	-0.0419150445969338	0.625806742529499	0.159639545819133	-1339774.44002905	101.851023233303	-3.98646282799037e-11	-10544.9107460844	-0.0254324297793813	57.7132929967401	247.735746448522	103.123584235445	-0.0472978988604	0.0081017981211743	0.6	-30.7595105080953	-0.0420152980683049	99.9786147267662	0.0213270552276053	0.0594149879031335	-0.0255331156159944	10654999.55	-23.1257086205322	-1.68787399376281	-0.000475737451982951	0.035880172485622	29.2947029558066	0.593749999999973	0.604170937736853	0.599388723842973	0.613735365524612	0.069380838192834	-121094948.664984	-0.36496937843228	4.02894437348782e-14	-0.00754390245652463	1.09890838675214	1.090005252849	1.100542477346	1.09829122507015	1
2005-05-27	0.0685620802808331	15.8952703782327	365274373	0.390625000000025	50.6955742658296	0.0590190446742882	0.634952518520629	0.161401913908929	-2330317.27284437	101.885466029535	7.98027830320225e-11	-10676.8148482034	-0.0185481956315254	65.2153984853627	257.523272172171	106.717287283824	-0.01112891737892	0.0017776692078975	0.7	7.8171903141903	-0.0100207753784751	99.9276148884295	0.0100557186321879	0.0495431340489444	-0.0198525535614613	9680946.4	-24.2521632488416	-0.579199586847226	0.00165822578367633	0.0350373164539812	46.5076660988014	0.609374999999976	0.605905625157894	0.60156102428128	0.614594826911122	0.113473717200274	-124489918.039984	-0.393417274104084	0.463735017750369	0.00252096282740591	1.09556971153846	1.09362215099715	1.10203808200085	1.09951632802295	0
2005-05-30	0.0657798509361032	14.8047428095646	359469846	0.468750000000041	49.3418194331389	0.0155962777576913	0.531139661311387	0.132929615649241	-1554845.99177934	100.20440803474	-5.8344117538243e-10	-32817.3466435252	-0.0152844265925163	57.6489886714804	269.10573311746	101.030465591558	-0.0250400641025699	0.00378239576584428	0.7	-3.04496902174898	-0.0226896268017575	100.000640079631	-0.0020607332064928	0.0392223605978569	-0.0180199582204499	9149168.6	-24.6691204524168	-0.624735207721534	-0.00325819487021052	0.0314328188846467	-54.4051627385003	0.53124999999996	0.581020416771916	0.594714155111492	0.553632940092764	0.045711971573148	-121007201.839984	-0.344012919142406	-0.338833118915244	-0.0126688514232824	1.1033599537037	1.09918660968661	1.09839810286286	1.09798938558003	0
2005-05-31	0.0643887362637382	13.7496615994138	353470324	0.568965517241386	46.9133980275537	-0.0505121608444925	0.346927989848501	0.130059005151296	-1794813.91966081	97.9548745524141	8.12848770252474e-11	-115488.021111553	-0.00888173213894072	49.1802295086016	274.404351991885	96.7186139360649	-0.00278222934473016	-0.00254081793523351	0.6	-3.67908392198672	-0.00260638052355798	100.253550114911	-0.0108909562274264	0.0291996972328003	-0.0268636296861025	8724771.7	-24.6419848308896	-0.577332997863072	-0.00282287657353527	0.0310885614478164	-53.1697341513345	0.431034482758614	0.531025105434149	0.573484471885711	0.446106372531024	-0.190343319927444	-123578425.55427	-0.350989866052124	-2.83173059523023	-0.0232164218742096	1.09501326566951	1.09779549501425	1.08762476207002	1.09218733010808	0
2005-06-01	0.0626001602564117	12.8596289921164	349611221	0.672413793103478	45.3122982140803	-0.0159168296822443	0.181543718902398	0.116764722577104	-2318767.52485852	96.138396288162	-1.54450816615573e-10	-107324.936565165	-0.00258604650631633	51.5860819801515	278.16991005729	93.7837858697431	0.0139111467236401	-0.00899340543900069	0.5	-2.59730585873775	0.0133451308722434	100.572789660298	-0.0271746017159591	0.0179248374430484	-0.0470521180666372	8368732.3	-26.7506673685139	-0.721434168730788	-0.00394135375331422	0.0312603925384209	-94.8012232415873	0.327586206896523	0.46321213925494	0.536727027675454	0.316182362413912	-0.496322812577665	-126034218.372453	-0.347342999770068	-3.49673566591507	-0.0157825726817748	1.0827714565527	1.09250925925926	1.07487807618533	1.08440503452769	0
2005-06-02	0.0622026989214502	12.9823010744659	341734747	0.874999999999977	41.0386663452035	-0.0801812171737113	-0.226686107690011	0.111533262995424	-3448857.32409447	91.9223947173354	-3.9310991830475e-10	-218481.064147051	0.00130194065490774	53.7551371448965	275.734727993178	89.3346309829944	-0.07790242165242	-0.0170168628838384	0.4	-2.5973058587382	-0.0748664350776628	101.19192699522	-0.0432757472995	0.00568472049453872	-0.0883536351183545	8099387.75	-23.9018377066886	-0.347392146645237	-0.00413395429040641	0.0315226146267653	-167.430025445287	0.125000000000024	0.350474759503301	0.474642938284736	0.102138401940431	-1.08209578221287	-129972455.372453	-0.25578288182642	-6.2878237315095	-0.0461193654111676	1.06273940527065	1.0808238960114	1.05061431930874	1.06943808380549	1
2005-06-03	0.0627988909238921	13.0962108652191	348379467	0.796875000000015	42.7489580173361	-0.129088043863818	-0.0203272545341744	0.124139966379477	-3921959.87303634	93.6406024638849	-1.68918482399299e-11	-140052.497885493	0.00267522052378055	60.1404242103825	275.199576588278	96.5624293711451	-0.08624910968661	-0.024229576160706	0.4	-17.0299727520351	-0.0814795460832887	101.524907906726	-0.0431571082896107	-0.00408364526229117	-0.134966017470484	7250256.25	-22.7254959636717	0.198911413920193	-0.000911238599453658	0.0308375946125949	-150.20475020475	0.203124999999985	0.301358173002196	0.416881349857223	0.0703118192921416	-1.43081364380917	-131118096.751763	-0.175002971191302	-3.69223581461978	0.0137867024797397	1.04493313746439	1.07025142450142	1.03907553029889	1.05972169625525	1
2005-06-06	0.0610103149165657	13.2019842423471	353341151	0.624999999999976	46.4304847896154	-0.087049629677965	0.248758064885369	0.132955819376268	-2599528.24583602	96.6471753050578	-7.80057751226633e-11	122142.822961178	-0.00292490777266163	59.5557212203865	277.095885995282	94.4747780247099	-0.0723379629629601	-0.0324942086189643	0.5	-6.30520024364319	-0.0668330202401142	101.490217950467	-0.0366270661003374	-0.0105923294299004	-0.17128496862826	7013644.9	-23.4628883746956	-0.205629711870065	-0.00183038260673657	0.0295951429123772	-115.773809523807	0.375000000000024	0.325905448668139	0.386556049460862	0.204604247082693	-1.46100275918951	-126950282.191762	-0.117529448304701	0.133094101832315	0.0296778461405076	1.03603000356125	1.06969497863248	1.04158451188967	1.0573363833127	1
2005-06-07	0.0618052375864879	12.5404047989799	353341151	0.624999999999976	46.4304847896154	-0.179268726152981	0.265940284078465	0.130298806340555	-2949474.0619643	97.1087376509027	3.66712572798293e-10	75924.9855324262	-0.0107900561125691	60.2455882905718	276.187506208015	94.238102372828	-0.0751201923076901	-0.0304603517710221	0.5	-2.74293906530451	-0.0693164197015554	101.438842937527	-0.0361637935381591	-0.0157066222515522	-0.198497768023753	6819866.65	-21.5908103774486	0.291468047481322	-0.00330247630896275	0.0288974498048625	-40.6576980567982	0.375000000000024	0.342270299112101	0.371794132677941	0.28322263198042	-1.46855439835478	-131129790.991761	-0.171377674672851	0.848955496631021	0	1.03213488247863	1.06357407407408	1.04325716628352	1.05538476363244	1
2005-06-08	0.0685620802808307	13.1074770779918	375352769	0.0481927710843479	60.9805534778016	-0.000214064344999636	1.30350626703544	0.137034102115073	2902311.79358405	110.877557969618	4.85302996572522e-10	1684137.66192571	-0.00321026462853058	66.2627076536882	277.0556853856	108.834500941364	0.14745815527066	-0.00969159642826142	0.5	2.88394513877304	0.131157298162796	100.115639383028	-0.0169026048395193	-0.0159458187691456	-0.166776247499745	7386105.7	-4.75972090600174	1.10377742989585	0.00605924210630987	0.0493357270249316	147.00805523591	0.951807228915653	0.545449275713285	0.429679180356389	0.776989466427076	-0.317330910439706	-112053055.391762	0.143490957630512	13.1668490230056	0.13645990235009	1.06218295940171	1.07247720797721	1.09537980719946	1.08161027734133	0
2005-06-09	0.0693570029507529	13.9793266911303	354081721	0.170212765957448	60.657958862812	-0.0060259562060394	1.12858955092679	0.164817573824797	3660206.44376962	110.20946575139	2.64928295597737e-10	1654547.19495633	-0.00392365676820461	70.0587800490183	276.090140187034	108.308699968232	0.08903133903134	0.0174341901265841	0.5	3.03978788164056	0.0773006733574795	99.1977591305887	-0.00276134595311328	-0.0133089242059391	-0.101398291894605	8052675.7	5.52262149954866	0.766724575728446	0.00571597534207414	0.0493791970916044	200.869565217393	0.829787234042553	0.640228595156374	0.499862318623051	0.920961148223021	0.553752723874412	-116961758.776379	0.268011796503462	10.346105939145	-0.00232194267086414	1.10113417022792	1.08193678774929	1.12920082469518	1.10256165594956	1
2005-06-10	0.0749214616402107	15.5741045156868	379790074	0.284552845528464	62.778488931777	-0.0338112107118533	1.08873624330369	0.205304702933984	1180388.57689558	111.968232480146	2.47354130545107e-10	328042.203636878	-0.00190832397362484	80.4516421408277	262.651660306175	112.239463637329	0.1140714031339	0.0428459394786301	0.5	1.57025982769217	0.097772680029972	98.3485815903142	0.00558373566633485	-0.00953039223148433	-0.00998889247459944	8780686.45	14.9751784384357	1.13493142837984	0.0118055727760068	0.0454884484314355	191.477844914402	0.715447154471536	0.665301448261428	0.555008695169177	0.885886954445931	1.41843959913017	-125207834.266947	0.542404154927506	9.17717799137688	0.0229803227500524	1.14286761039886	1.09390037393163	1.16102226750809	1.12476229180126	0
2005-06-13	0.0749214616402107	16.9496886952631	366026551	0.349593495934954	59.9926238858762	-0.0532673898881149	0.921964229841822	0.217307119925261	-925662.656760305	109.100684541122	-2.2496566109339e-10	204459.560296462	0.00322809943202951	71.1777802883448	251.352851023456	112.787922422137	0.10016025641026	0.0587713868128673	0.5	2.20778502238631	0.0869747661475631	97.9341062651925	0.0139289408561474	-0.00483852561395799	0.0839204654844439	9196554.5	14.0899218237332	0.677026386584437	0.00672983485158674	0.0445059530096788	120.8858342879	0.650406504065046	0.660336466862634	0.590117952400329	0.800773495787244	1.90973299725057	-128648715.016948	0.488869733069633	4.30402630059679	-0.0183418163389334	1.17402857905983	1.10502929131054	1.17481728446408	1.13887956936032	0
2005-06-14	0.07770369098494	18.2270168620125	355663229	0.439024390243889	56.2935321866584	-0.118921952598165	0.753197913548447	0.226912793507603	-4482252.8395333	105.882736723941	0	-311755.372484816	0.00558229349295458	64.8089805157853	235.865333471729	111.665701877772	0.06677350427351	0.069609759889763	0.5	3.20384586531941	0.058671571251722	97.8916502205338	0.0145696250024316	-0.000956895490680065	0.162620762134624	9409999.2	11.1605080334709	0.628669283712906	0.00473239393131546	0.045329734466494	91.5126625598936	0.560975609756111	0.62721618116046	0.602484028653706	0.676680486173967	2.0518716018779	-138364329.391948	0.494920664887321	-0.15803753490026	-0.0257822320684353	1.19906864316239	1.11560176282052	1.1738124548374	1.1448656104919	0
2005-06-15	0.0804859203296685	18.3878406991787	348400021	0.577235772357714	51.0542689211356	-0.152690793494222	0.556494748271628	0.227705844975454	-7007032.04772106	101.506878720534	-5.76040568914843e-10	-330349.500868044	0.00932760222624474	63.4972299604383	227.012310590108	112.216316040627	0.0333867521367599	0.0514599048107348	0.5	7.07247736807108	0.0301398558179219	98.2407340433077	0.014090937543336	0.00205267111612315	0.210514825460351	9512927.4	6.68393082256661	0.508290658948127	0.00238611950162061	0.0468374836875315	26.9730269730266	0.422764227642286	0.559065529987735	0.588011195765049	0.501174198433107	1.80627640041811	-143732787.478903	0.554404500906714	-5.23632985284196	-0.0412005668570825	1.18404460470086	1.12311378205129	1.15737660213282	1.14116366253404	1
2005-06-16	0.0812808429995907	18.5371771194045	355095382	0.455284552845519	55.0312166320342	-0.153289293524251	0.709177904002784	0.230111014544872	-6499985.63920918	105.049820957157	3.46843140795873e-11	-32057.0148348499	0.0157481314833126	63.8567252206034	222.710525117569	114.787469234397	0.10016025641026	0.0325952902998895	0.6	3.75084393988613	0.0897969033160695	98.2251323538927	0.0168593368250127	0.00501400425790107	0.249760382538833	9482725.15	2.52533831282434	0.209116528928753	0.00485673244037949	0.0477487103719227	38.9048073861823	0.544715447154482	0.554282169043317	0.576768186857805	0.509310133414342	1.88645672181302	-140385106.978902	0.310973473260332	-1.25635820903291	0.036440625623938	1.17792370014245	1.13952893518519	1.16033051372008	1.14572269423596	1
2005-06-20	0.0848579950142428	17.9115421795611	370345265	0.439024390243889	55.5498160720612	-0.101669013337042	0.72379144049601	0.231750801751511	-3514749.73374887	105.313508929076	-7.63934004650368e-11	182138.895844472	0.0238094626616316	59.91247035986	214.732683966862	111.9625477194	0.1224180911681	0.0104868259154095	0.6	3.00666620850764	0.110339417230989	98.2045160213638	0.023481117511934	0.00870742690870766	0.282086603283993	9751165.05	5.20566958766613	0.965933700544264	0.00609674866145074	0.0474854960219737	29.7239915074326	0.560975609756111	0.556513315947582	0.570016563221064	0.529506821400618	1.96535567631444	-132937489.699832	0.34960365307777	-0.433404572646721	0.00475994123314447	1.16735122863248	1.15510941951567	1.16415460767473	1.1504645308447	1
2005-06-21	0.0850567256817235	17.4515586077518	370345265	0.439024390243889	55.5498160720612	-0.0721128841508015	0.701251974557942	0.232806559192111	-2681825.60628915	104.750368767895	2.42268428368814e-10	42428.6719862994	0.0339931354554803	64.3491264825007	209.395027231162	111.9625477194	0.16971599002849	-0.0055106444950792	0.6	2.35609545937115	0.156458782642156	98.2209294183309	0.0321617421565346	0.013398289958273	0.307019303306899	9812452.4	3.23184669699801	0.458511077637356	0.00773596254144987	0.0467968088744088	48.04796298919	0.560975609756111	0.558000747217092	0.56601129121974	0.541979659211795	2.0034620215593	-135525547.972558	0.259650351067712	0.317580760215947	0	1.16123032407408	1.16762945156695	1.16670400364451	1.15434421534276	1
2005-06-22	0.0856529176841657	17.0244310053574	379112013	0.365853658536584	58.0732612192533	-0.0786841073122572	0.771254359733348	0.237314574341348	-1463114.99492094	106.564702420503	4.94464774274101e-11	109759.965945496	0.0428570327909323	67.6164351198975	203.181485620235	99.7680750952803	0.18084490740741	-0.0140752988601056	0.6	1.89065176950858	0.163815805819733	98.0844317157691	0.038676502950542	0.0184539325567268	0.332935232919862	9901109.8	1.09775897437249	0.820531154987274	0.0103807852924	0.0464177120676433	58.2442203890422	0.634146341463417	0.583382611965867	0.571801731468449	0.606544372960702	2.18265315824853	-133020762.829702	0.171365943438386	2.54266483530378	0.0211437256573164	1.16623833689459	1.18265349002849	1.17675028899187	1.1620712415871	0
2005-06-23	0.0860503790191272	16.0418643256777	367617091	0.573770491803266	49.6426768213549	-0.110138011026861	0.503986322212294	0.237560179208022	-3166457.42491411	100.297048784679	-2.51855493006044e-10	-290008.900351669	0.0477616037511923	65.853370166076	194.726567948696	94.1883988315356	0.0806846509971502	-0.00739196909008612	0.5	2.20190705729726	0.0742647930346826	98.5179599866267	0.0376275461160827	0.022288655268598	0.33353552193387	10199517.4	1.3666527357817	0.378025030833292	0.00944907231366027	0.0477287972611194	1.42059868087417	0.426229508196734	0.530998244042822	0.55820056899324	0.476593594141987	1.81567290185298	-141134825.417937	-0.0502276667358211	-2.79883088579651	-0.0598731666445428	1.16679478276354	1.1754196937322	1.16026256801738	1.15574685694733	1
2005-06-24	0.0826719576719557	15.1294809802609	372893242	0.524590163934432	51.4638155186894	-0.076345896169823	0.561298159272407	0.236815087426241	-2498884.04768027	101.593678466074	-1.93661177764028e-10	-355730.479878912	0.0542713070257188	62.7051972441855	199.809089777508	93.4116970021823	0.09737802706552	-0.00670218749442443	0.6	2.17767224580912	0.0889646694040673	98.7449283721489	0.0366592782688886	0.0251627798686561	0.323147214516695	10244875.65	-3.09005564833612	-0.230625699720038	0.00951523471305784	0.0477360566661033	-36.1156573922563	0.475409836065568	0.512468774717071	0.542956637567851	0.451493049015512	1.62332124638216	-136738032.917937	-0.129584262885512	-1.6347398726639	0.0146998763693847	1.16234321581197	1.17013345797721	1.15483521272383	1.15360751970904	1
2005-06-27	0.0818770350020336	14.7553971699329	384162198	0.495145631067977	55.2407541800227	-0.065760302899687	0.681488119100192	0.239462757497303	-2406199.88388637	104.4573151348	1.82719041026968e-10	247831.716858061	0.050294145847035	64.1867257521202	208.128011895676	98.1488939382122	-0.01947560541311	-0.00143412337086732	0.6	2.13202093877146	-0.0163679706850205	98.6708176082892	0.0383337042666132	0.0277969647482475	0.317461623066562	10536725.9	-2.03215547522119	0.820306489202462	0.00962196034895642	0.0477873163474888	28.9156626505999	0.504854368932023	0.509930639455389	0.531947971530363	0.465895975305439	1.70475471160789	-138347883.775083	-0.304330347257861	1.27335599109005	0.0311272622610018	1.1640125534188	1.16568189102564	1.16327330302197	1.1584333313289	0
2005-06-28	0.0818770350020336	13.7200193481401	376963185	0.680000000000027	49.7849063807963	-0.104370564692329	0.494430859541369	0.234888623269268	-3422430.43203379	100.086032278996	-2.32255842205222e-10	33544.2360554556	0.0445335043191657	60.3745760350202	218.10948335261	96.6759585338926	-0.0639912749287801	-0.00216567902719852	0.6	3.17972009213108	-0.0549491591880888	98.9845244491628	0.0415914693997315	0.0305558656785443	0.298344830604247	10606450.2	-4.36740204747811	0.0329245818560349	0.00675925406126353	0.0495750560988752	-74.2386831275714	0.319999999999973	0.446620426303583	0.50350545645477	0.33285036600121	1.4212164992865	-143147225.775086	-0.327687556164264	-2.24085664543475	-0.0409031311739324	1.15622231125356	1.15872631766382	1.15313273026725	1.15378210467961	0
2005-06-29	0.071940501628	12.7585970850468	373794865	0.825581395348835	48.8676699495816	-0.108635255619245	0.450913533022242	0.229251793117677	-4268596.48320654	99.0928572145882	-9.77275038717545e-11	-183471.583700578	0.0334045869402486	53.8139012784512	229.394393754684	100	-0.10016025641025	-0.0107219255736204	0.6	-2.34984892607618	-0.0853246152644512	99.2976930916456	0.0396762314511658	0.0323799388330686	0.26861255727566	10464890.1	-9.72310505165007	-1.93836892592446	-0.00421051545145342	0.029113287359425	-92.138364779871	0.174418604651165	0.355886485752777	0.454299132887439	0.159061191483453	1.12480057826025	-146315545.775086	-0.391204658453549	-2.29649407448398	-0.00739513332631003	1.14175471866097	1.15399652777778	1.14359011908605	1.14845897596035	0
2005-06-30	0.0727354242979229	13.1096440700149	362689279	0.990099009900988	41.0033014685703	-0.141525512911283	0.13428030818941	0.226287979874044	-7171868.93703753	92.0053764677053	-4.18211166524996e-10	-461247.654580643	0.0226502004346603	43.2556592518652	231.231492205596	89.5031669517862	-0.15858707264957	-0.0185471843138692	0.6	-1.06991901296657	-0.141438349698735	100.156015006408	0.031487790241576	0.0322015091147701	0.20733366294805	10827214.25	-7.08621371599025	-0.649898674295336	-0.009169945299478	0.03423046159126	-194.766982622426	0.00990099009901215	0.240557987201522	0.383052084325467	-0.0444302070463669	0.3136485023298	-156680759.375086	-0.297822877201343	-7.25161880523489	-0.0744555507732169	1.12506134259259	1.14592806267807	1.11033349463287	1.12943375228146	0
2005-07-01	0.0663760429385416	14.0448487554828	355075838	0.947916666666648	37.8375289191228	-0.141927682698051	-0.0152132932024308	0.226923142756182	-8791050.05953139	88.5612434507544	-4.80404072199824e-10	-596301.538016372	0.0128053889071564	28.7971288843556	231.353336618907	85.7541080024001	-0.16693376068376	-0.0296672665438699	0.5	-0.596771387225565	-0.153686194356004	101.118472465182	0.0215750350641071	0.0300762143046375	0.117758475975571	10814062.6	-7.96736952543601	-1.21690072067295	-0.0134958323423549	0.0336404218410966	-251.787648970744	0.0520833333333522	0.177733102578799	0.314612423743244	-0.0960255397500916	-0.611090822592164	-160668752.279846	-0.254390318265969	-9.06403632897927	-0.0380300767257047	1.0972390491453	1.12979113247864	1.07517867472201	1.10678562184852	1
2005-07-04	0.0633950829263315	15.1022647428468	360644552	0.843137254901969	39.6302266954081	-0.11448180195204	0.0521606001820833	0.232377801912284	-7363703.21225096	89.7762556346804	-1.89047025440243e-10	-109542.77399396	0.00720526061071336	31.1172961172026	236.226262332972	86.9412656688662	-0.10572471509972	-0.0465026301887648	0.5	-0.801208093611757	-0.0987368357183557	101.725331409606	0.0132808700832825	0.0267171454603665	0.0209411216000044	10760262.3	-10.4802939207056	-0.904857684141728	-0.0112088059120166	0.0343781550040049	-193.564605329312	0.156862745098031	0.170776316751876	0.266667054746122	-0.0210051592366144	-1.239694733702	-155755181.103375	-0.340926339010979	-6.0306813144508	0.0137487917805658	1.06496518874644	1.11448887108262	1.05637917702265	1.09078463271678	0
2005-07-05	0.0598179309116793	16.0841510168278	357889678	0.905882352941177	37.7541599430738	-0.138930624677244	-0.00811196439061211	0.241293751501333	-6309642.34253943	88.0090634182158	5.90069827731241e-11	8074.83362267	-0.00276439454123345	33.4781528721136	239.220114922119	83.2625886348216	-0.169715990028493	-0.0571085310471791	0.4	-0.841669225340985	-0.157267186836196	102.346074806233	0.00498266486758436	0.0223702493418101	-0.0814487222926763	10649921.8	-15.3127320123633	-1.32490113527095	-0.0109512934655763	0.034276604987149	-143.813481071099	0.0941176470588229	0.145223426854192	0.226185845448812	-0.0167014103350479	-1.8890827880318	-156542287.960518	-0.343965375458603	-5.41362686676632	-0.0220897254939024	1.03769934116809	1.09696082621083	1.0364269003038	1.07364603528938	0
2005-07-06	0.0592217389092375	17.2943111115838	353678818	0.945054945054945	35.7062842371065	-0.130886014430076	-0.0371365476208238	0.263885627102048	-5872690.32355022	86.0831722679322	-2.2059532143096e-10	-83378.8672987851	-0.0148563913087116	34.6047245907533	245.915485239489	86.1787791502379	-0.200320512820517	-0.0668556216494292	0.3	-0.97265364815135	-0.187475661165088	102.998374797669	-0.00267721686998335	0.0173607560994514	-0.188718442025604	10512172.4	-17.8668412442826	-0.545154702150368	-0.00986301403652291	0.0335041055950618	-126.981402002862	0.0549450549450554	0.115130636217813	0.189167442371812	-0.0329429760901852	-2.57264952575796	-158647717.960518	-0.271138470689479	-5.37477956719171	-0.025448533095747	1.00709481837607	1.07442476851852	1.01477869445704	1.05507080755741	0
2005-07-07	0.057433162901912	18.4180311995716	350962100	0.956043956043954	35.4760256071534	-0.247897070469817	0.0311666325920835	0.292949918125172	-5337744.93738274	86.7239239334345	-1.41041361771915e-10	-56499.3684339367	-0.0280363110891926	29.549892766565	250.346455214639	84.678021313252	-0.203102742165246	-0.0670267512009187	0.3	-0.519243459312577	-0.190343671248409	103.473278294236	-0.00867778872591884	0.0121530471343773	-0.292722617747798	9547427.4	-21.6627581631731	-0.901990364414242	-0.0127184872893878	0.0307857879268887	-109.754851889683	0.0439560439560461	0.0914057721305574	0.156580218958061	-0.038943121524449	-3.11227092577361	-159388641.051427	-0.359759533386199	-3.1973393865769	-0.00286801008332165	0.99207077991453	1.05856606125356	0.999419147444297	1.03936703407766	0
2005-07-08	0.0530610882173375	20.0066873987093	344195539	0.990740740740742	31.1495197783436	-0.275152411585541	-0.0448667277662065	0.324738888403271	-6296927.168621	82.7940299461784	-2.88282575435533e-10	-192040.512041491	-0.046441828292787	32.6635570976266	248.385152486286	77.3677808784758	-0.283787393162394	-0.0634332749152904	0.2	-0.369103735598162	-0.270645787789975	104.289454431673	-0.0148588310571054	0.00675067149608079	-0.405618169464672	8822203.05	-19.9222572413978	-0.812578849398683	-0.0171623317841242	0.0325089588500538	-120.173300839425	0.00925925925925779	0.0640236011734575	0.12572801302986	-0.0593852225393465	-3.93790351705227	-165510767.670475	-0.264113894232901	-6.72652870464071	-0.0591583908842498	0.973708066239315	1.03547355769231	0.97063125380427	1.01640129452249	1
2005-07-11	0.0530610882173372	21.4098514289713	348612069	0.962962962962965	32.4797064670901	-0.277878379649523	0.0331926800074154	0.338036859728837	-6885546.24079227	84.7157010918908	1.92795704757797e-11	-169829.546719198	-0.0604956534443686	27.9172597330007	245.797384025792	81.3347632607472	-0.205884971509976	-0.0580218827519016	0.2	-0.416638890740532	-0.20167266098633	104.771247771123	-0.0209924438773892	0.0012020484213868	-0.513308709791926	7757611.9	-21.1558840065719	-0.764836557136048	-0.0165093681643875	0.0329687470359995	-100.502246893999	0.0370370370370352	0.0550280797946501	0.102161368618123	-0.0392384978522959	-4.49553568805974	-168321286.761384	-0.17266831000197	-4.51696297584975	0.00909996015910283	0.95423246082621	1.00959882478633	0.954221554055648	0.99912872361993	1
2005-07-12	0.0594204695767187	21.3213392334016	356702257	0.64545454545456	44.7429817379568	-0.227755316580505	0.303051076826296	0.338403824203433	-4839450.91547263	93.728612245019	3.9612073939972e-10	378571.834379441	-0.0714105531813838	26.0489911922635	244.769344318562	89.8558553665469	-0.13354700854701	-0.0421543429927638	0.3	-0.930514830198273	-0.124134408879086	104.210219787424	-0.0221598698469354	-0.00347033523227764	-0.580776229888225	7473945.15	-17.5159047118738	-0.0803139586725923	-0.0111338616746321	0.0439321939107532	-55.3440702781846	0.35454545454544	0.15486720471158	0.119729980649275	0.22514165283619	-4.19363573008928	-162693329.891819	0.0809420865064041	4.86033914595754	0.092238128476628	0.957014690170939	0.997357015669518	0.972958867233679	1.00118413634171	0
2005-07-13	0.0546509335571823	21.2391493375154	352494527	0.712962962962963	42.657106902939	-0.187364067383787	0.264772665326187	0.333486468427355	-4153369.38835059	92.4513380976739	2.02362797502186e-10	313312.65580484	-0.0851611866736035	33.4403821593727	252.279513392834	94.6691408676537	-0.191973824786321	-0.0243355491198494	0.3	-1.27139389592999	-0.177535916184073	103.931027358433	-0.0249496349540421	-0.00776619517663054	-0.624967810000387	7166165.55	-19.1425157982445	-1.00498206275444	-0.00855614696155384	0.0419787720842185	-38.0339588918681	0.287037037037037	0.198923815486732	0.146127925595094	0.304515595270008	-4.08464028745632	-165217967.891819	0.0736076357954933	2.69873757990878	-0.0222742450439844	0.960353365384614	0.983724091880344	0.978031131099756	0.998818958612658	1
2005-07-14	0.0544522028897016	21.0972096693813	355899806	0.685185185185186	43.7167471905872	-0.156273556337421	0.308059682505394	0.335680518925908	-3569362.10963222	93.793765215488	1.25024706335968e-11	-32616.0787815973	-0.0945957977207942	38.4078905117832	263.221401841654	99.1693755360845	-0.136329237891733	-0.0135378782690608	0.4	-1.13347107705654	-0.128221694538568	103.578047233269	-0.0386537201241344	-0.0139437001661313	-0.647405474861584	6973269.1	-21.4346256628937	-0.437869980041606	-0.00901056752103505	0.0417401501199011	-28.8630332720966	0.314814814814814	0.237554148596093	0.176603333262094	0.359455779264091	-3.88860769077201	-165527538.71	-0.102696354287578	3.11893563751397	0.00841109047157206	0.965917824074073	0.978994301994303	0.984194869688536	0.998401392840556	0
2005-07-15	0.0542534722222204	21.4443690144575	352714591	0.755102040816328	40.997200661276	-0.194303055243109	0.253883226137941	0.336281758734846	-3349598.14184403	92.0306414145792	-3.15929699083883e-10	-30098.5924701727	-0.0986978025239208	25.9768657120384	266.861762529555	95.0843048276324	-0.155804843304846	0.00170855450001582	0.4	-0.593875404387681	-0.149143104391327	103.513853076689	-0.0532298036736476	-0.0218009208676346	-0.662228183523828	6797761.8	-23.5711096852739	-1.26353189777529	-0.0132631510074245	0.040290198440886	-48.0000000000003	0.244897959183672	0.240002085458619	0.197736250660936	0.324533755053986	-3.91193346530293	-166801624.71	-0.0930111735535568	0.239918125962933	-0.0283165431790686	0.97704674145299	0.975377403846155	0.979029930931959	0.993001149309328	0
2005-07-18	0.0538560108872595	22.0897037384739	348277995	0.744444444444444	40.7243734098388	-0.254849111913096	0.272172168278218	0.337660171519951	-2432215.14120257	92.6726540523635	-2.82651298545303e-10	-50481.8070023143	-0.0963079388560125	27.421543404921	272.730942206792	96.9288673868409	-0.077902421652426	0.0160846992949077	0.3	-0.762333492182319	-0.0775638128475757	103.432361681032	-0.069038844087969	-0.0312485055117015	-0.67025122648855	6257097.45	-23.4321398723131	-0.484056517553615	-0.0106055966310786	0.0396066895137096	-72.3219140837387	0.255555555555556	0.245186575490932	0.213553025604268	0.308453675264259	-3.91092768929557	-164829804.265556	-0.0705090821566013	-0.951002321449676	-0.00287625922946586	0.985949875356124	0.970091168091169	0.974659228645997	0.988076908357464	1
2005-07-19	0.0568369708994694	21.9809820179474	353422994	0.625000000000003	43.5559880106653	-0.227257014022986	0.348510024017978	0.324879759667545	-1320553.79200521	95.3942377356794	2.44485960169113e-10	43929.1713964577	-0.0887281473719749	33.7640450252524	281.538325175605	101.43195063569	-0.01947560541311	0.0121960196003975	0.4	-1.07745245417801	-0.0195715162455769	103.130529867607	-0.0804215398418859	-0.0410831123777384	-0.664820941612809	6039870.05	-22.0999118658406	0.484823695970521	-0.00863912134325039	0.0404541914405371	-21.9032841996386	0.374999999999998	0.288457716993954	0.238521256067496	0.388330638846868	-3.7124574449775	-162977604.625555	0.0406343933673723	-0.0470357087873566	0.0199622198762941	0.980941862535612	0.968978276353278	0.978237295593058	0.987589003108321	1
2005-07-20	0.0540547415547398	21.7413933729029	358994329	0.301886792452775	46.3176721937027	-0.225121682644098	0.429176721271195	0.297860832240411	158970.476678744	98.1920703564227	1.44497362512571e-10	104353.546229538	-0.0822897833114149	45.2827464682899	293.522404674254	103.733764786513	-0.0139111467236399	0.0121546507560658	0.5	-5.47773540808167	-0.0137487917805658	102.672391650327	-0.0870763260604916	-0.050281755114289	-0.642535342741346	5880099.4	-20.2003210134798	-0.689813522915614	-0.0021022955656711	0.0366904207483352	56.6734417344246	0.698113207547226	0.425009547178378	0.300684019771123	0.673660601992886	-3.35962281778415	-159495520.250554	-0.00382743378426575	2.02443989717848	0.0195715162455769	0.984280537749288	0.972316951566953	0.987114542028802	0.990730827070497	0
2005-07-21	0.0518687042124525	21.5189182025045	356385364	0.217391304347797	45.9716271318822	-0.154487941457457	0.441079979955119	0.279619426390486	1116165.43680075	98.5228710764506	2.96700037243484e-11	50623.1915509391	-0.0752985403426073	53.2741981871503	317.298254110598	109.750923388068	0.00556445868946309	0.00988214698328157	0.5	21.971752806218	0.0055683454271842	102.313816039961	-0.0897949233764608	-0.0581843887667234	-0.609903760562924	5435801.55	-22.9087118941482	-1.07096164691306	0.000365366270998202	0.0352743291929318	68.9393939393983	0.782608695652204	0.54420926333632	0.381859100959522	0.868909588089915	-3.0669200368064	-157930141.250552	-0.0134485014388989	1.50302181031989	-0.00277258828615233	0.985393429487181	0.975655626780629	0.992105296537722	0.992795550431418	1
2005-07-22	0.053856010887259	20.2546323944642	368999540	0.158730158730193	52.4724056355016	-0.164490120586131	0.631502681192752	0.262095781706164	1988078.39798683	103.65511090255	2.6510060226868e-10	294682.640836394	-0.065917433705892	66.4911924852958	338.97537035694	113.889977272615	0.0779024216524171	0.0122231033721624	0.6	4.72789264805855	0.0771362439340988	101.583536649668	-0.0918763625381669	-0.0649227835210121	-0.554428189648382	5802702.8	-10.4734983983033	0.81765711332541	0.00274791354378316	0.0373217887046036	212.738654147104	0.841269841269808	0.643229455980816	0.468982552633287	0.991723262675874	-2.42661862541854	-155827778.583887	0.0185875067273376	5.3537071205858	0.0461193654111676	1.00153035968661	0.989288550569802	1.01119843249713	1.00308448751951	0
2005-07-25	0.0542534722222205	19.0806527155696	363520400	0.174603174603156	52.0754769383834	-0.158527323172067	0.677201624778406	0.218143867637076	2164035.66410992	104.066681987638	2.26044236918215e-11	290689.898281666	-0.0548241859339579	71.6927281223734	357.350194631136	103.579550926503	0.0779024216524259	0.0155833909791213	0.5	3.19529652351702	0.0773494372265001	101.048829916479	-0.0944397439208327	-0.0708261756009762	-0.487172228495181	5513212	-10.4808004835147	0.687576447806101	0.00411907341650518	0.036696050053146	172.463768115949	0.825396825396845	0.703951912452826	0.547305672573133	1.01724439221221	-1.9201968444771	-155827778.583886	-0.041970520006124	3.72235070980367	-0.00265481679092028	1.01766728988604	1.00180858262108	1.02299978002183	1.01099684889255	1
2005-07-26	0.0540547415547395	18.4413009108829	372122900	0.132352941176453	54.6609311081126	-0.109501554114243	0.829417106225271	0.188629520321513	2160431.77692825	106.356272434033	1.11129185195461e-10	76147.3357371826	-0.0380059662411389	78.8878662954246	371.946711569944	107.883458872536	0.153022613960114	0.0255669093445397	0.5	2.02158628555854	0.154945217583445	100.472553817235	-0.095307818626901	-0.0757225042061612	-0.408228129086086	5583386.35	-6.35508226091231	0.714385956322173	0.00724306314626417	0.0358670113579321	168.768768768769	0.867647058823549	0.758516961243067	0.617709435463111	1.04013201280298	-1.34975290685663	-155375015.425991	-0.231046039525675	3.93301347861617	0.0184373894726951	1.03380422008547	1.00737304131054	1.03735921350933	1.02101161827288	1
2005-07-27	0.0548496642246621	17.8476170922451	379410498	0.0441176470587823	56.8116495296378	-0.023694812593508	1.01240514685159	0.16035971533023	3583710.12007403	108.247014397213	2.7974522629845e-23	144596.754807685	-0.0211342421378438	83.4159031312836	392.787272624435	108.65501009163	0.161369301994306	0.0310201618113434	0.6	1.83880250005371	0.161382605765556	99.9048816474893	-0.0967511712812856	-0.0799282376211861	-0.319639122646376	5789350.25	-4.74873031133606	0.986749465158921	0.00856610470257023	0.0358070881351121	143.599776411411	0.955882352941219	0.824305425142451	0.686574765356224	1.0997667447149	-0.759707538727628	-149059097.159324	-0.169345020598002	3.91625569954084	0.0155373483412135	1.04938470441596	1.01683262108262	1.05249662785712	1.0322406797783	0
2005-07-28	0.053657280219778	17.6970820069826	369888431	0.178082191780815	54.4918730975278	0.00559363908058449	0.914116787026255	0.163651612492459	2047826.67338985	106.72270685469	8.53579389118395e-11	-5404.12855012403	-0.0113429350208152	91.4736896491251	406.707816527508	110.339656331881	0.05842681623932	0.036389906782356	0.5	1.37597190600965	0.0562135094712722	99.6093102103962	-0.0938031439703653	-0.0827032188910219	-0.234370527204031	5710174.3	-0.823615121029923	0.341618965590317	0.0117514484969564	0.0311661551091429	124.327923429046	0.821917808219186	0.823509552834696	0.732219694515715	1.00608926947266	-0.398568660410747	-156041946.292657	-0.11502961475069	1.54182013914972	-0.0129309678176556	1.06273940527066	1.02406641737892	1.05795118851444	1.03889879433298	0
2005-07-29	0.0520674348799326	16.767355223797	363841198	0.301369863013673	50.4950516951402	0.0180680387311512	0.743350177733569	0.168367059370387	577180.051394001	104.020250439533	-2.06089102304185e-10	-141942.98655627	-0.00349562148439886	84.521656308272	414.272114936647	108.065118968801	0.055644586894591	0.0283038116889951	0.5	1.65986472312604	0.0547821009106133	99.6058436986683	-0.0942921526195872	-0.085021005636735	-0.164475893403726	5631863.9	-1.81560262372675	0.314246492162843	0.00942513617966003	0.0325602621776666	59.5360824742316	0.698630136986328	0.78188308088524	0.74877415663889	0.84810092937794	-0.304480690596809	-158633617.57837	-0.149183962811468	-1.4879361497955	-0.0237056536046434	1.06162651353277	1.03157843660969	1.05324087425179	1.03979360367726	1
2005-08-01	0.0463042455229932	15.6948765072124	363841198	0.349206349206321	50.4950516951402	-0.0116557576141887	0.729155147971436	0.171037244138873	335001.116453901	103.890629848058	-1.35732556701593e-10	-75711.5509815572	0.004298187641542	77.6608653121397	422.854941048884	105.92928818997	0.047297898860403	0.0204523617716097	0.6	3.01393334974899	0.0463710104390412	99.6101284193083	-0.097525774563598	-0.0875219594221076	-0.107822258320966	5620042.5	-3.44611571865937	-0.416871930078944	0.0025232841187334	0.0207553067041388	34.3209876543211	0.65079365079368	0.738186604188053	0.745244972488611	0.724069867586938	-0.227326053831101	-157065298.166604	-0.133377382990158	-1.40163728615291	0	1.06107006766382	1.03936867877493	1.05010066474336	1.04052572041349	1
2005-08-02	0.0474966295278775	14.7134901777326	370109504	0.206349206349199	54.376064841296	0.0428054029089689	0.847267801139646	0.176186161248042	1630507.05428517	106.001257400006	8.89135931016438e-11	78479.3920272323	0.0169252285137746	78.2753385017773	435.179034959936	106.368120890014	0.100160256410256	0.0131036165226816	0.6	1.71809497629019	0.0983932072227532	99.414391935531	-0.0949461976686112	-0.0890068070714083	-0.0536283553842498	5795714.1	-3.58680837420982	0.398582832823529	0.00581020353281213	0.0202045833746403	57.2513690160756	0.793650793650802	0.756674667342303	0.749054870773175	0.771914260480559	0.0276257601983465	-151580530.416604	-0.183856755183449	0.611075048759617	0.0237056536046434	1.06162651353277	1.04771536680912	1.05635387977193	1.04567746394359	1
2005-08-03	0.0518687042124525	15.435483376522	385652658	0.292682926829293	57.560953683517	1.66412643760819e-05	0.898626071482097	0.1922602489291	-14924.5343013406	107.570478521828	3.69779781764682e-10	251457.868700984	0.0289637208707763	81.1991412425947	420.193741117908	108.884593484091	0.125200320512816	0.00654152214961246	0.6	1.62258899235622	0.121879507802871	99.1010268448514	-0.0902108557046226	-0.0892476167980512	0.00364875889258265	6362328.8	6.63401798578779	1.51829340987814	0.00669429866318694	0.0205958271717854	129.148665819565	0.707317073170708	0.740222135951771	0.746110625832707	0.7284451561899	0.395673909838723	-158645600.416606	0.00108176881536637	2.30430345522076	0.0206100413506516	1.0632958511396	1.05634027777778	1.06794196804358	1.05393940587874	0
2005-08-04	0.050477589540088	16.1059056325407	378806620	0.365853658536583	54.4887210423275	-0.0304205280884179	0.777392574678179	0.196035821680722	-1868106.59011504	105.375551176819	-1.32291642964987e-10	115836.733217577	0.0383091579005084	77.9236857447707	408.432656079693	102.386166293181	0.08903133903134	0.000784161919941274	0.6	1.46654921450649	0.0864997160686299	99.0218149907511	-0.0809173650510346	-0.0875815664486479	0.0531931026440002	6568794.8	5.0142444161204	0.765150300108633	0.00759573136645116	0.0191927100467313	83.6799700206107	0.634146341463418	0.704863537788987	0.7323615964848	0.64986742039736	0.551162365904267	-163385165.185836	0.0315141925026527	0.87068412674876	-0.0154175718579467	1.06440874287749	1.06357407407408	1.07010290153523	1.05766401726779	1
2005-08-05	0.0510737815425296	17.1593731390274	393725907	0.151898734177205	61.1823455488017	0.0916101361344402	0.988146159818871	0.192294748375562	438819.415262401	109.15538104361	6.53744924915397e-11	316438.15938839	0.0451755572448727	83.7820232586117	402.917603291578	107.443363025404	0.11963586182336	0.0087544469500677	0.6	1.3037542842355	0.112485627498922	98.5840871378716	-0.0654901937530044	-0.0831632919095192	0.112300854672753	6976431.1	11.5057496605387	1.21276738969169	0.011130248087197	0.0215306681733336	131.858407079647	0.848101265822795	0.75260944713359	0.739110880034397	0.779606581331975	1.04288342465841	-152728531.614404	-0.00447822861613467	4.66111073315866	0.0455574276758686	1.08054567307692	1.07108609330485	1.08823689993137	1.06981690444158	1
2005-08-08	0.0488877442002425	18.3810710658892	403431337	0.147058823529393	61.8536772545942	0.107671743941196	0.968062483014936	0.189968051342723	1342669.19789357	108.595703985323	1.06077362553493e-10	400582.634993789	0.051025372790201	84.553168297199	400.621957743907	106.002494198146	0.12798254985755	0.0167268983691474	0.7	1.33107314714607	0.120194376111278	98.2492418684638	-0.0518917808651438	-0.0769089897006441	0.174852837622974	7240876.1	11.316407189236	0.63466034777513	0.0100435027881849	0.0214233881430723	152.572706935127	0.852941176470608	0.786053356912596	0.75475837232713	0.848643326083528	1.4528977002866	-152728531.614401	-0.0234974674294501	3.7903884715828	0.00493616032620459	1.09779549501425	1.07943278133903	1.10218105175862	1.08077189552731	1
2005-08-09	0.0482915521978007	19.3487426469612	411887477	0.109375000000025	62.8904173186258	0.117919713520789	0.955366516082618	0.195933095772484	3373905.04219152	108.729179061126	-2.9750690518005e-11	62293.1134259002	0.0538432717419142	77.6323697169596	397.920193628318	105.139088822284	0.08903133903134	0.0225239853415077	0.7	1.35674059739993	0.0814338640607388	97.9738449821017	-0.036985205676964	-0.0689242328959081	0.237611466010912	7259173.7	9.91606167565656	0.417258102660771	0.00915933866638559	0.0212460392452876	128.423772609818	0.890624999999976	0.820910571275056	0.776809105309772	0.909113503205624	1.81476015399828	-145573336.229786	-0.0779680881667556	3.06459457398619	0.00735885336062796	1.11170664173789	1.08666657763533	1.11425938232151	1.09125264969458	1
2005-08-10	0.049483936202685	20.6251858829599	423436671	0.125000000000025	63.9456767313619	0.138261199699883	0.934395153096377	0.205641322493456	4273230.58006738	108.703127277318	8.04295100767208e-11	83489.1409588452	0.0564114834447409	79.3349266420087	404.035152993062	107.288363216039	0.10016025641025	0.0265131022498238	0.7	1.31308567218465	0.091393776841303	97.7472299686618	-0.0206570784158171	-0.0592708019998899	0.29831842559811	7626246.9	11.4215938130011	1.48766206002	0.00988080948833401	0.0209796560572285	140.74547390842	0.874999999999976	0.838940380850029	0.797519530489858	0.921782081570372	2.13425147616566	-144129686.979789	-0.0559240650706753	2.61405984585792	0.00730509598964391	1.12283555911681	1.09306570512821	1.1250938320415	1.10134539183765	1
2005-08-11	0.0484902828652822	22.2606548773708	445968705	0.0298507462686636	69.2771476845576	0.232058021563851	1.06147971292124	0.221999441898538	9294697.92585841	112.136681831919	6.80221956473674e-11	581057.692307717	0.0585159902567798	81.1376576968926	421.116883006876	114.393319657334	0.12798254985755	0.0359071612388346	0.8	1.31308567218463	0.113373223567762	97.2746318030558	-0.00173264338974843	-0.0477631702778616	0.369097488385095	8582584.65	20.6014219549952	0.580116769101323	0.00945547444187456	0.0202111580595188	162.691131498474	0.970149253731338	0.882676671810465	0.825905244263394	0.996219526904609	2.69756481145307	-125694386.434335	0.0261380162956923	5.23080030172308	0.0404168361991541	1.14676273148148	1.10558573717949	1.14808276480829	1.11820270792933	0
2005-08-12	0.05087505087505	23.1711199909828	429111218	0.432835820895508	55.2923991974039	0.130850596012584	0.709748876216305	0.217324952743002	5750409.34995693	104.345862715863	-5.1429350898339e-11	-100309.900006642	0.0557515957155421	71.0805442770588	409.915383524694	107.196659828667	0.0361689814814801	0.0284136410655954	0.8	2.46669622196746	0.0328582824262055	97.5287750227426	0.0142379423717687	-0.0353629477479356	0.413454721963236	9266198.25	22.431159599969	1.12384673611832	0.00515117133842418	0.0279304276772506	86.2453531598562	0.567164179104493	0.777505840908475	0.809772109811754	0.712973303101915	2.56078474555037	-142551873.434335	0.174084137749614	-2.0300081587487	-0.0649775928003429	1.14564983974359	1.11309775641026	1.13836865588359	1.11833684067567	1
2005-08-15	0.0502788588726086	23.7595414130212	438879395	0.283582089552247	58.6238660046218	0.148870788454378	0.813873462830266	0.19974567373733	5363917.79874794	106.046197352492	-1.14112921811406e-10	-497282.289162656	0.0532547232266825	64.8174658813808	394.759546470986	107.288363216039	0.0779024216524198	0.0222774289196955	0.8	2.33170032496531	0.0703500068450499	97.5553582823452	0.0304781450295615	-0.0221947291924361	0.44703763109597	9532777.3	18.8527478987825	0.127076998347851	0.0055980605496753	0.0282109505609282	63.3744855967088	0.716417910447754	0.757143197421568	0.792229139015026	0.686971314234652	2.62350986863298	-136446762.809336	0.131233187613434	0.0809374404867109	0.0245607566011889	1.14898851495726	1.12339200498576	1.14116668108289	1.12350518445854	0
2005-08-16	0.0514712428774929	23.8774244137359	427790093	0.507462686567166	52.325298566622	0.094658830669906	0.595834754853582	0.180856335425288	2566202.73309003	101.624772076461	-3.66472124801425e-11	-95510.8173077076	0.0512928948425779	58.5822516758304	392.277715804777	101.274944128889	0.0612090455840399	0.0133958783483537	0.7	6.03748068006228	0.0569845463785774	97.9243549741477	0.0354102721596568	-0.0106737289220176	0.45571822708228	9829992.45	16.7262669151413	0.419806860525703	0.00188012671650565	0.0301465780554612	23.0681818181803	0.492537313432834	0.66894123609199	0.751133171374014	0.504557365527943	2.34269340414317	-144367692.809335	0.162895496096972	-3.2087156346067	-0.0370711140711159	1.14231116452991	1.1270089031339	1.12912088449211	1.12014593115891	1
2005-08-17	0.0528623575498579	22.9029690299183	438241994	0.44776119402984	53.7522568877621	0.122242926802768	0.639572429663177	0.163177858420677	3787105.28620474	102.125633611922	-2.19961673730167e-10	-173238.189436416	0.0532547232266816	52.2818268286555	397.959346173986	103.884258944299	0.0723379629629599	0.00587696503182091	0.7	3.59323772083818	0.0670053217570525	98.1516616065402	0.0425312165979563	-3.27398180227888e-05	0.45102220604103	10074020.75	14.4425041375902	0.0931719286576183	0.00351718911167427	0.029906616094702	-23.3333333333314	0.552238805970161	0.63004042605138	0.710768922933136	0.468583432287869	2.17589261690383	-134865964.627517	0.0111934591849936	-1.91520585956079	0.0100207753784751	1.13619025997151	1.12951290954416	1.12479999255789	1.11942089070992	0
2005-08-18	0.0558433175620679	22.4937198128859	424779057	0.701492537313422	47.2758219339361	0.053962980808292	0.324881541049945	0.141809616353995	656685.903248444	97.5001525795198	9.17078955508904e-11	-260225.144954141	0.0501514674190988	49.8888866731574	385.796524020048	95.0516367641692	0	-0.0160250773230028	0.7	5.87570190817423	0	98.7081388366918	0.0448240432414184	0.00893861679386545	0.420722482098035	10616719.35	14.5519770002398	0.800339690442229	0.00216370763330561	0.0316006260286949	-46.2015503875968	0.298507462686578	0.519529438263113	0.647022428043128	0.264543458703082	1.6805409703692	-146471944.799931	0.16767426376072	-4.98754291496247	-0.0432996681524091	1.11115019586895	1.12895646367522	1.10615343164828	1.11022805782249	0
2005-08-19	0.0572344322344322	21.4051366799199	416959280	0.838709677419375	45.5379470046904	0.0293803301525134	0.22222749752853	0.138022609945175	-1585316.54598372	96.2067780243643	-2.96970110273175e-10	-372775.348891578	0.0448902003890022	49.1404204727941	369.934925613455	93.352603364752	-0.0361689814814801	-0.0215313039017216	0.6	9.74422720377835	-0.0337104120313692	99.255520828163	0.0480105868141252	0.0167530107979174	0.370849004749929	10376999.4	10.5732422136493	0.382875998238996	0.00123406946799428	0.0318595532240463	-123.2423490488	0.161290322580625	0.400116399702284	0.56472041859618	0.0709083619144906	1.17160717866869	-149730185.216598	0.162658165631818	-4.2507625177735	-0.0131003706807176	1.09835194088319	1.12200089031339	1.08908534213399	1.10017734969211	1
2005-08-22	0.0566382402319907	20.394309485023	421618059	0.762711864406783	48.3979039286022	0.0381648881565103	0.337948196386923	0.133410371476564	-1911737.11839114	97.8587214735582	-1.0800083202788e-11	-9024.76184116962	0.0408238651928592	48.6878884866399	349.304436835041	94.378920141094	0	-0.0300328013636074	0.6	12.8703809632753	0	99.527074618046	0.0526641527856884	0.0239352391954716	0.317827795922043	10335981.35	4.8314991935762	-0.296752746064596	0.000839234680676482	0.0315889643874382	-116.151202749137	0.237288135593218	0.345840311665928	0.491760382952763	0.0540001690922591	0.900116354666247	-147938347.139675	0.129557318194558	-1.82199970647296	0.0182928401734225	1.0838843482906	1.11643643162393	1.08419848426217	1.095495062206	0
2005-08-23	0.0536572802197807	18.9773953046545	415005338	0.806451612903238	46.5188006911987	0.047090879585121	0.250050249729959	0.13538017712965	-1286864.96252236	96.6161758534931	-1.15888635334924e-10	-628.995281337768	0.031852959036456	41.6513041163103	332.10590514808	92.4789054161896	-0.0639912749287799	-0.0313168031409826	0.5	-8.64192196344593	-0.0585895073551962	99.8476991575247	0.0543915404412267	0.0300264994446226	0.260503775951637	10236492.4	1.57285526667336	-0.854625066272824	-0.00157300994198749	0.0312329190454404	-127.601809954749	0.193548387096762	0.29507633680954	0.426199034238355	0.0328309419519083	0.575187256954757	-145734106.806343	0.16482916894849	-1.80331478522743	-0.0130320796793276	1.07498121438746	1.10864618945869	1.0763035301064	1.08913480031307	1
2005-08-24	0.05325981888482	17.7872612956616	419970918	0.741935483870965	48.2498535948412	0.0186574141752227	0.324941560672308	0.135380177129651	-805988.758405074	97.6795734253572	1.11460737528593e-10	-18364.5012575707	0.0236667842336944	45.2621274446858	310.309351123645	89.7477491462859	-0.05842681623932	-0.0328832290854956	0.5	26.211915628472	-0.0530864525347827	100.00126131364	0.0553439991975555	0.0350899993952092	0.207130653008569	10120391.5	-2.56465073484482	-0.321139982380576	0.0002693631581323	0.031121493430751	-86.9883040935638	0.258064516129035	0.282739063249371	0.378379043908694	0.0914591019307261	0.395053518522626	-145282690.442706	0.0826317909630165	-0.258950596286319	0.0104392151466181	1.06607808048433	1.10113417022792	1.0747498664622	1.08595438919684	0
2005-08-25	0.051669973544975	16.5695020972524	415653021	0.774193548387102	47.423328725906	0.056243387029564	0.294767008284103	0.137175834549104	-453202.608015895	97.1846993084364	-4.66108393260326e-11	15617.385038288	0.0152844265925229	38.268539989896	317.213894050538	95.2756772610049	-0.0723379629629601	-0.0214113725011485	0.4	-2.87261228466881	-0.065651291378964	100.160142329732	0.0560091742538029	0.0392738343669279	0.156938210955415	9860183	-6.64655410943294	-1.2398863272578	-0.00343089149599775	0.0281229490821935	-83.3333333333272	0.225806451612898	0.263761526037214	0.340173204618201	0.11093816887524	0.208301259913313	-144950544.51963	-0.0277320296394467	1.66625397512463e-13	-0.00520598548355339	1.06552163461538	1.08833591524217	1.07185927113624	1.08234051488547	1
2005-08-26	0.0532598188848207	16.2130093035302	425570312	0.548387096774205	53.4363122901917	0.0949527601279281	0.540550112837346	0.131083710273224	1211793.53112231	100.455265086089	1.45960184458407e-10	181131.866542017	0.00784731353641965	38.2223259769455	322.198725349645	96.3607606852531	-0.0417334401709399	-0.0106059887393176	0.5	-11.4692476173518	-0.0370711140711159	99.9635344506502	0.0559811290723249	0.0426152933080073	0.124419941234932	10053685.9	-4.56815176839882	0.0215942766272867	-0.00117456592669263	0.0300482221633557	-21.4732317311452	0.451612903225796	0.326378651766741	0.335575020334381	0.307985914631461	0.345889365891572	-139541113.065086	-0.0760090855692839	3.0708754312583	0.035885273297492	1.07553766025641	1.0869448005698	1.08291594452767	1.08646574696276	0
2005-08-29	0.054452202889705	16.1279034253767	417886868	0.661290322580625	50.3365051310432	0.0603028109421636	0.375730965241714	0.120871199571907	376144.891057938	98.4979452699125	1.05280081853602e-10	118325.384504113	-0.00258604650631544	43.8197403347912	326.354909597503	98.2375484915877	-0.10850694444444	-0.00283963266429338	0.4	-3.82973641027857	-0.0952696264503331	99.9742716168113	0.0546711353610856	0.045026461718623	0.0976240152377184	10171243.8	-4.99229400112108	-0.0958249205807391	-0.00296103102279988	0.0302429657607423	-9.86733001657566	0.338709677419376	0.330488993650953	0.333879678106571	0.323707624739715	0.306595079067651	-144798206.328243	-0.0356732379217422	0.774845322277881	-0.0177816761800631	1.07776344373219	1.0808238960114	1.08379519165093	1.08629991767815	1
2005-08-30	0.0540547415547436	16.0488765385198	426727330	0.580645161290341	52.4579546752561	0.0206628113100391	0.460342801623912	0.114337412424536	-639405.258869931	99.6218557761559	6.12927252973049e-12	-13329.3797854417	-0.00624218122214582	42.5599658744794	323.499709768263	98.5043897954233	-0.01947560541311	0.00486962167201763	0.5	-4.55028286348543	-0.0175586544435567	99.8720770369718	0.0530338751130599	0.0466279443975104	0.0803102231293762	10299851.6	-4.1803424706881	-0.267276513255677	-0.00256939169569277	0.0304214837604749	10.1268824854777	0.41935483870966	0.360110942003855	0.342623432738999	0.395085960533566	0.37434116699373	-147324052.61396	-0.0943550502914563	1.67235245919989	0.0127333792064334	1.08555368589744	1.08026745014245	1.08901840530765	1.08869353857687	1
2005-08-31	0.0532598188848207	16.1095217546436	436818547	0.409836065573749	56.4635166382667	0.101181823815297	0.677453694881369	0.114472483510011	1382305.88053234	101.97571731173	0	201870.882300575	-0.0102193424008294	36.2569021125747	340.993520432684	105.46627241203	-0.0194756054130998	0.0139532270780035	0.5	-2.64631162965781	-0.0171289838066204	99.5800452857083	0.0523786285286452	0.0477780812237373	0.0788699588838426	10027254.75	-2.33846067186169	-0.803272588434407	-0.00370792074997048	0.0289166472228017	55.5897435897533	0.590163934426252	0.436795272811321	0.37401404609644	0.562357726241083	0.626164682559183	-138354081.947294	-0.111983289381456	3.18330179029347	0.0249904272381252	1.09668260327635	1.08138034188034	1.10177464556122	1.09571055448442	1
2005-09-01	0.0508750508750529	16.7965911152296	452104494	0.10638297872343	58.7112915730864	0.147203448930432	0.784020986862502	0.11556176073422	3573033.97931807	103.161269546581	8.91263604599934e-11	267967.431223277	-0.0093276022262363	49.4081898476268	364.017433477225	108.439396147703	0.03895121082621	0.0210118691846647	0.6	4.76408262824965	0.0346420066338802	99.2446748489367	0.0541279795885719	0.0490480608967042	0.0924132661274779	10449250.2	3.56578666286444	-0.0978609808664288	0.00184350712431964	0.0236587485400206	140.46121593291	0.893617021276572	0.589069188966405	0.445699093719761	0.875809379459691	0.935995740657813	-132621851.822296	-0.194416553222634	3.56836354505255	0.0146998763693847	1.11226308760684	1.08889236111111	1.11584326441973	1.10448690860302	0
2005-09-02	0.051669973544975	17.9793391217971	438831357	0.315789473684227	57.1232314769814	0.0457616602438828	0.695081833376775	0.120174810296465	1280486.1802184	102.357224610564	9.33108744577517e-11	72193.6640290535	-0.0102728468113049	58.7336523804343	371.097522223102	105.696913118304	0.0194756054131	0.0191554654792035	0.6	-123.225552050193	0.0172983036231768	99.0771833857593	0.0570268710337631	0.050643822924116	0.110989299090059	10366942.7	6.15402399883041	0.306612361259166	-0.000453709793397991	0.0227971716413101	168.273092369472	0.684210526315774	0.620782968082861	0.504060385174128	0.854228133900327	1.10571848644192	-143240361.4223	-0.188903200976078	1.74487857200555	-0.0073229276322283	1.11838399216524	1.09696082621083	1.12244011431401	1.11014998233021	1
2005-09-05	0.0498813975376486	18.6741125449498	446629370	0.22807017543859	59.108467376573	0.0778192208175413	0.792205626442474	0.121506125159376	1817309.17926471	103.520208834923	-9.52956621334907e-11	-1153.71538906587	-0.00761546109101841	60.2281335432912	383.231170733307	108.395115084015	0.0806846509971499	0.0236119350146014	0.6	2.80694734779209	0.0727732280148329	98.8651531252874	0.0607728590388359	0.05266963014706	0.135637704199931	10271571.85	3.72534680166377	-0.352111902143143	0.00302072374520354	0.020488321015681	124.131455399058	0.771929824561411	0.671165253575711	0.559762007974656	0.893971744777822	1.32470063488559	-136742017.255634	-0.175886219350194	2.31114223860207	0.0121752562392471	1.131182247151	1.1044728454416	1.13147506315141	1.11731270569312	0
2005-09-06	0.0496826668701679	18.6448796246014	437581400	0.508771929824563	50.9748992084785	0.00731360031920999	0.464767577143047	0.120968036386553	-118240.702506334	99.6612500533468	-4.49152690217204e-11	-147148.569655882	-0.00579631113484891	60.8139281962403	380.711172103492	103.11547469574	0.05008012820513	0.0206401367391357	0.6	-125.690063091198	0.0463792634546516	99.0665516062444	0.0588802530728854	0.0539117547322251	0.14695517529888	10301163.35	2.76806318347896	-0.144243452583638	-0.000464687119646796	0.0231714632287299	59.8200899550191	0.491228070175437	0.611186192442287	0.576903402797199	0.679751771732461	1.16090517534759	-144066564.398491	-0.119576452215535	-1.93412112824821	-0.039494335240899	1.13229513888889	1.10892441239316	1.12265980587112	1.11507935762356	1
2005-09-07	0.0467017068579579	18.2501370502622	446005287	0.4035087719298	53.5558424444212	0.0299667119578468	0.604212961484073	0.117650682378522	624104.618329555	101.281168673423	-9.64856263267127e-11	-131076.664329579	-0.00388798716122052	63.2786742605459	382.112231935793	105.219560172301	0.0472978988604	0.0152493746969295	0.6	2.52276686447522	0.0430801802125974	99.1048392782842	0.0567051968974348	0.054470443165267	0.154520744534903	10144898	1.46293992446858	-0.468869141807586	0.00364119500020801	0.0200573099994084	33.162393162401	0.596491228070201	0.606287870984925	0.586698225526441	0.645467161901892	1.13913364609624	-138049502.255634	-0.0766767430069183	-0.77931316069637	0.0149937569313683	1.131182247151	1.11393242521368	1.12234742637372	1.11628723212453	1
2005-09-08	0.0465029761904772	18.9643755747611	464000896	0.210526315789463	57.9287609024646	-0.042563831280366	0.880900442013809	0.108356571652349	1947580.07360403	104.240870917534	1.33561383742634e-10	345685.06972266	0.00140894947586023	72.2107735693912	379.033586505468	104.280239377574	0.0918135683760699	0.00908702314937192	0.7	1.76192094986194	0.0830302015623079	98.9169218043849	0.0583357526478181	0.0552435050617772	0.168951359289227	9918076.75	7.98399177928224	0.833471746165863	0.00651965474669961	0.0203722634088128	107.070707070703	0.789473684210538	0.667349808726796	0.613582086593226	0.774885252993935	1.32753710336597	-134137413.342589	0.0387121596569273	1.55289383957423	0.0269179416703829	1.13285158475783	1.12255733618234	1.13234068097279	1.12283995176933	0
2005-09-09	0.04769536019536	19.6804473640927	454089275	0.333333333333354	54.4174558511882	0.00307966504233344	0.71683865084614	0.108784196048147	218253.384449467	102.414644529313	4.45159885774897e-11	178856.103098244	0.00426251803455679	65.8262282874599	376.590154207134	104.357029917068	0.0612090455840399	0.00614289783902804	0.6	2.48025553950867	0.0555454255348881	98.9445852712727	0.0544904399852306	0.0550928920464679	0.179458510408348	9570783.45	6.65894140838167	0.754954510477098	0.00399377715312573	0.0209614844512178	92.1367521367485	0.666666666666647	0.667122094706746	0.6314287559644	0.73850877219144	1.32005140838276	-141962377.289961	0.000185619905221701	-1.56804021224014e-13	-0.0170455608808017	1.13229513888889	1.12533956552707	1.13251098223447	1.12466024867633	0
2005-09-12	0.046304245522995	19.860683856349	449131907	0.39999999999997	53.9146873549617	-0.0271426192353263	0.699674623873093	0.107474390261711	-400959.734767884	102.240267151808	-1.5458590375792e-10	-103413.677161234	0.00938110663671954	66.4357698164441	377.72427292414	102.78358360213	0.0639912749287801	-0.00123282049841608	0.6	2.13329677585399	0.058292438018336	99.0043305332518	0.0502988676786744	0.0541340871729092	0.185317738714441	9330243	1.66159559851002	-0.288120263442449	0.00474317555396906	0.0204914964552716	37.512147716232	0.600000000000031	0.644748063137841	0.635868525022214	0.662507139369096	1.27907122841153	-141511707.471777	-0.0792166273787315	-0.163864294459992	-0.00245897300010545	1.12840001780627	1.12979113247863	1.13169710662735	1.12564372262848	1
2005-09-13	0.0472978988603979	20.3259794014057	457344331	0.219999999999991	57.7023657237594	0.0546561075141934	0.888653522229058	0.110639678132645	1249185.36428554	104.269489708179	3.77028761626285e-11	95923.5443376139	0.0125913712652537	67.3274571664199	379.068553177901	102.468075151743	0.05008012820513	0.00268834254121619	0.6	1.96462250671538	0.0443232324063089	98.8778583803308	0.0477138298624979	0.052850035710827	0.195599035847982	9186399.1	0.215811910954942	0.503118021183672	0.00557632519176423	0.0209747202660214	66.6666666666698	0.78000000000001	0.689832042091898	0.653856364045442	0.761783398184809	1.40973735781891	-134325836.471777	-0.0469888066670999	1.96476176202679	0.0219160676854648	1.13841604344729	1.13535559116809	1.13950121092346	1.13100112206251	1
2005-09-14	0.0467017068579565	21.0988068974651	470786715	0.130434782608647	59.6847684765639	0.0460884174242753	0.943202309133041	0.118304577866093	3698447.60967596	105.274049535597	5.18265220961376e-11	196319.299768525	0.0183698475966143	72.3321796943634	385.099350547716	102.188854098107	0.0834668803418801	0.0072714219775648	0.6	1.74901660925284	0.074076108942607	98.7016192509286	0.045755676392909	0.0514311638472434	0.211728782426746	9335923.25	3.33442670813282	1.13564422214507	0.00680743946252438	0.0207991116890692	125.076142131991	0.869565217391355	0.74974310052505	0.685818609538644	0.877592082497861	1.59287720562813	-126260406.071777	-0.120796436136776	2.23029246748099	0.0119712003562351	1.14787562321937	1.13952893518519	1.14934099602875	1.13791374827648	0
2005-09-15	0.0449131308506307	21.4000134492208	462513716	0.41025641025643	54.2122421113415	0.079789541188749	0.704972116914261	0.120665460560064	2936540.35144475	102.434918693994	-3.04092873838133e-11	-21587.4148637854	0.0220616519194281	66.2569223335454	395.682190774049	100.489987055718	0.0417334401709399	0.00558558755990365	0.5	3.43492681798027	0.0372552812364071	98.8009129921601	0.0381696737819268	0.0487788658341801	0.220327704097012	9076426.35	1.57136708601955	-0.181282719992048	0.00249768357423729	0.0204125832201035	66.9632925472736	0.589743589743571	0.696409930264557	0.689349049780615	0.71053169123244	1.52110752923484	-131987866.917931	-0.131994571401124	-0.485231908633032	-0.0240874484997665	1.14564983974359	1.13925071225071	1.14662675494984	1.13851093455203	1
2005-09-16	0.0433232855107858	21.6797052472796	469795312	0.36842105263159	55.0989799388029	0.08705673439889	0.72224356990645	0.116089253669412	1881635.43448415	102.51197510763	-1.16937003087559e-11	-94827.8328659407	0.0255037689933555	64.4114786598149	398.357180641538	99.7579712460546	0.0194756054130998	0.00702563548762624	0.6	2.30520617138873	0.0171289838066204	98.8538698664066	0.0373737214484933	0.0464978369570427	0.224834888605319	9049517.3	-0.685252910830875	-0.0537178151912627	0.00410486171537258	0.019574998390839	60.7388316151186	0.631578947368412	0.674799602632509	0.68449923406458	0.655400339768367	1.48647511209781	-133973756.736113	-0.196908086729866	0.0809374404867109	0.0048641298083385	1.14843206908832	1.14036360398861	1.14667208046038	1.14001126126647	0
2005-09-19	0.0425283628408629	21.5005655348413	462843934	0.421052631578972	53.9733137438364	0.0837768402486121	0.660798163489469	0.109806654855485	1604428.48726711	101.710995298165	-5.01103530408206e-11	918.742209759075	0.0244158459803525	58.785526108278	416.567719068616	103.273124229909	-0.00278222934472994	0.00967178675582558	0.5	2.90412514843318	-0.00243502237110277	98.9542081403076	0.0340707845148047	0.0440124264685951	0.223909296550096	9164147.25	-2.80118849072612	-0.24039922442293	0.00284292507536849	0.019539743913292	3.4567901234569	0.578947368421029	0.642848857895349	0.670615775341503	0.587315023003041	1.40310180974959	-132583481.136115	-0.192970571508879	-0.525455427902296	-0.0048641298083385	1.1506578525641	1.13952893518519	1.14484747790426	1.14022708154385	0
2005-09-20	0.0419321708384208	20.430357863164	452278008	0.857142857142916	46.7702324396182	0.0218660641667115	0.294578290890457	0.0955680183666102	-947776.598464027	98.0570463469045	-7.17966804248029e-11	-225118.133457976	0.0233457577708414	51.2370209654242	419.107260177396	98.2637771367661	-0.0333867521367499	0.000732110785111178	0.5	-8.13946605102373	-0.0298400418290578	99.3381904016579	0.0312359372948405	0.0414571286338442	0.20616645957181	9361807.5	-1.31912750572735	0.0459688535592093	-0.00140258619008178	0.0207061031515972	-148.590381426218	0.142857142857084	0.476184952882594	0.605805501188533	0.216943856270715	1.04782729108759	-141639989.136115	-0.223545337758574	-3.53078069350021	-0.0347279470901833	1.14008538105413	1.13925071225071	1.13064733925811	1.13332162343875	0
2005-09-21	0.0419321708384207	19.438477758471	443917623	0.976190476190471	42.0246190746482	-0.0192656831017195	-0.020880392385679	0.0910795106138769	-3806345.04542953	95.3344361323761	-1.48142462370758e-10	-333710.602241347	0.0181379951512199	42.1538823220856	415.344136975501	92.9981127161305	-0.07790242165242	-0.0121656298967919	0.4	-1.69599245908211	-0.0701736230548375	99.8711420814434	0.025408890617109	0.0382474810304972	0.16869872802765	9531547.75	-2.04515971519143	-0.603429430921972	-0.00444358799705286	0.0212610097006106	-205.246913580245	0.0238095238095295	0.325393143191572	0.512334715189546	-0.0484900008043754	0.539977504507472	-148955326.011114	-0.168315737804505	-5.05331807668379	-0.0281583249865327	1.12060977564102	1.1342426994302	1.11097907256334	1.12210724448148	0
2005-09-22	0.0421309015059022	19.7572960842399	434528423	0.881355932203361	37.2182793370848	-0.0364559658009476	-0.271358812938246	0.101952427446361	-5480021.00080015	92.2423758962562	-2.85667281972101e-10	-297731.697104236	0.0154449398239502	32.8377965931433	415.131300269157	91.404167291134	-0.06955573361823	-0.0210034035433433	0.3	-1.17263103843281	-0.0650129768515102	100.559723722727	0.0208861488668122	0.0347752145977602	0.109365572589204	9785112.9	-1.70455577175172	-0.346182125723921	-0.00633321625015985	0.0226634115621138	-244.245628304188	0.118644067796639	0.256476784726595	0.427048738368563	-0.0846671225573409	-0.125723562811586	-152085059.344447	-0.149412457042131	-6.41228667755515	-0.0343336890375716	1.09946483262108	1.12255733618234	1.08581056760633	1.10635566506527	0
2005-09-23	0.0421309015059022	20.0533416724539	429817322	0.966101694915245	35.5349180553525	-0.0823359791308681	-0.210332517910774	0.124430492964848	-6435517.94707771	91.3427246925155	-8.87272862204427e-11	-202567.309083422	0.00891740174593103	33.8212211179596	411.089864490371	90.3982048601978	-0.10016025641026	-0.0344404293061158	0.3	-0.778196169576975	-0.093532368738827	101.186517357131	0.0167113103280765	0.0311624337438234	0.0357288839565317	9524803.4	-5.61151378996443	-0.503947318980169	-0.00816780560448876	0.0220753573798418	-196.014381099131	0.0338983050847546	0.182283958179315	0.34546047830548	-0.144069082073016	-0.752525753453015	-155225793.344446	-0.191027022998922	-5.97513246834525	-0.0135256349559485	1.07442476851852	1.11142841880342	1.06439451539377	1.09093870977498	1
2005-09-26	0.0407397868335372	20.4487569693051	433917444	0.78688524590159	40.7313282467164	-0.0369862242058484	0.0485408009059643	0.140534183817859	-5351575.4976224	93.7449231703123	-2.64312139427687e-11	18565.2502337126	0.000428035283808192	38.6525358454627	406.290062065987	90.6063492677658	-0.10572471509971	-0.045074248199497	0.4	-2.41299431912241	-0.0962343613719383	101.435991819609	0.0132856484992021	0.0275870766948992	-0.0338558718610771	9345637.3	-9.48103498351705	-0.791523693793337	-0.00365093868198843	0.0218099671879671	-138.197424892705	0.21311475409841	0.192560890152347	0.294493948921102	-0.0113052273851647	-1.05765409473038	-151711403.05873	-0.136063500970021	-2.16727525605209	0.0242159490372716	1.05550560897436	1.10308173076923	1.05846383528626	1.08287757619248	0
2005-09-27	0.0427270935083438	21.1712053411991	428886120	0.985074626865673	34.7057941024116	-0.0491492087079447	-0.149211659917169	0.16143455901877	-5697964.43078853	89.6726298262343	-3.69245159007689e-11	-74651.0166266017	-0.00793648755387122	39.9693079360403	382.114112957598	85.2442100374554	-0.136329237891733	-0.0511063106804049	0.3	-0.86944425123462	-0.128221694538568	102.018946120669	0.00734126977397342	0.023537915310714	-0.112869359514622	9155180.4	-11.7245964235596	-0.515388190535516	-0.00814786140288671	0.0240230372814934	-128.887070376431	0.0149253731343265	0.13334905114634	0.240778982996182	-0.0815108125533432	-1.65709291401902	-156323450.05873	-0.0253684782254672	-4.70057286963573	-0.0490328940474315	1.03436066595442	1.08722302350427	1.03781667247954	1.06717662540586	1
2005-10-21	0.0496826668701675	20.2338789281144	446592405	0.119402985074604	56.8543079407469	-0.00137943025273603	0.743033562772587	0.161843086737412	-290615.158722311	104.050262781049	4.19690981005123e-10	1302640.75020032	-0.00936327183322017	39.6581305018596	372.901493212022	101.462793667531	0.02782229344729	-0.0328064851690547	0.3	14.8366891659984	0.024321799982459	101.074093607919	0.0134111036134068	0.0215125529712526	-0.139632408270629	9535933.8	-0.971816241860298	-0.0162081223945556	0.00146992036419451	0.0510499662767608	36.7063078100032	0.880597014925397	0.382431705739359	0.287996557243907	0.571302002730263	-0.919517207789611	-138617165.05873	0.212290757929601	9.75805179578125	0.150084521520922	1.05161048789174	1.08611013176638	1.07784166460649	1.08367026603396	0
2005-10-24	0.0528623575498583	20.5407612196687	408725465	0.397590361445796	53.8043986220139	-0.185347699488114	0.595814044920179	0.164904058217854	-7729856.46602771	101.851045618649	1.53826849893891e-10	954530.123197013	-0.0135722854572979	59.4518070978474	349.437335598917	98.7869202284174	-0.0222578347578399	-0.0132476462413383	0.3	23.0925035612543	-0.0194570946853593	100.574126211622	0.0175159036641832	0.0207132231098387	-0.140658549745398	10664983.45	19.8270897656134	1.34037052878797	0.00113245891112911	0.0511961539452083	80.155961420068	0.602409638554204	0.455757683344308	0.343916932610707	0.679439184811508	-0.517715456156276	-172156454.773022	0.44486642962171	6.35599412526398	-0.0218628269823535	1.07108609330484	1.08527546296296	1.09617830465694	1.09261232398375	0
2005-10-25	0.0564395095645104	19.488426102982	391268159	0.602409638554195	48.5107772194525	-0.174476111577555	0.350496927957187	0.163071091923838	-12626716.2202429	97.8188603536327	-3.21474578714379e-10	-886942.249265527	-0.0212769205657792	54.7099443859209	318.33690955394	95.1240211082302	-0.0834668803418801	0.0043637403690714	0.2	-6.69044056954199	-0.074076108942607	100.576057773806	0.0146704029659308	0.0195046590810571	-0.140937819439202	10874191.9	20.3830405891086	1.25888328824046	-0.00167434360605185	0.0524693586693761	-6.73358427436068	0.397590361445805	0.436368576044807	0.374734147088741	0.559637433956939	-0.542315004098937	-181186095.807503	0.611434233585481	1.12308866550765	-0.0426478139010126	1.0838843482906	1.07915455840456	1.09263676507044	1.09132893524079	0
2005-10-26	0.0592217389092397	18.4777094317394	377794797	0.795180722891549	44.1118561162436	-0.231358934008549	0.137586337661729	0.167834492108352	-15523862.2383417	94.2684248750787	-2.67154705626033e-10	-712734.811809932	-0.027162405718091	47.8471375608573	293.968550697472	94.4468851225717	-0.10016025641025	0.0125907676145966	0.2	-1.97830494554867	-0.0918605187897546	100.927950778677	0.0101176281596536	0.0176272528967764	-0.15484528686468	11157959.35	18.2703311738111	0.495066421382461	-0.00618615283320184	0.0529757211760321	-60.6035777686723	0.204819277108451	0.359185476399355	0.369551256858945	0.338453915480174	-0.881631486074852	-188371888.874168	0.798122017836778	-3.31604355687433	-0.041871858346914	1.08277145655271	1.06913853276353	1.07543718217422	1.08218513181188	0
2005-10-27	0.0608115842490839	17.8589208430287	367781211	0.903614457831336	41.8149325142602	-0.217538650295416	0.0614548571167348	0.180988450447517	-16478165.1199217	92.3733453220127	-1.80888967213256e-10	-425258.282696791	-0.0353842501278361	40.1611423575328	277.594607332086	94.8075421737653	-0.13076477920228	0.0240671392483294	0.2	-1.34226203444906	-0.121071622981811	101.384500030637	0.0029188198133816	0.0146855662800975	-0.183870537437925	11206240.15	14.411356951694	-0.29446992938513	-0.00876444708874853	0.0528985976727878	-91.7491749174911	0.0963855421686642	0.271585498322458	0.33689600401345	0.140964486940475	-1.32531286702181	-192822371.540837	0.702288031413809	-5.19245782623456	-0.0243469743837175	1.08666657763533	1.06051362179487	1.05562410554254	1.07015109916957	0
2005-10-28	0.0653823896011387	18.3419190885465	357568809	0.934579439252334	36.1794022318019	-0.270076072356813	-0.145270268961708	0.211854331732194	-17176031.9341788	86.7405810595607	-4.91171272153625e-10	-480535.974225443	-0.0457284361531116	40.0753804680271	261.708912108159	91.4018722767041	-0.194756054131051	-0.00346321224636263	0.2	-1.03906649061774	-0.187124184424243	102.301885151471	-0.0112168515112947	0.00950508272181902	-0.242569699121065	11295665.9	11.3015858887061	0.210605784723946	-0.0119545074090971	0.0551728000349576	-142.233856893541	0.0654205607476662	0.202863852464194	0.292218620163698	0.0241543170651867	-2.1849351056598	-199063283.87417	0.815736643445082	-10.989757211353	-0.070916691250771	1.04437669159544	1.04799358974359	1.01923014324869	1.04765857544073	1
2005-10-31	0.0671709656084645	18.7904174593846	366663842	0.813084112149531	40.6581106018382	-0.286606952469093	0.0777929633075498	0.228990993756298	-15164155.13044	90.7613008795591	-1.70220385713109e-11	-190686.516481914	-0.0501336326155992	43.0474820479389	248.398691184898	96.1870943558626	-0.11963586182336	-0.0279778554067568	0.3	-1.44389319810798	-0.11489264060094	102.6501361505	-0.0227670400099875	0.00305065817545771	-0.303044058103852	10850637.1	7.98627626723431	0.222378371380465	-0.00957309652565106	0.0566547466664515	-112.818590704645	0.18691588785047	0.197547864259619	0.260661701529005	0.0713201897208479	-2.57265899655177	-196334773.974171	0.600412550592589	-4.9774796221445	0.0375035967331201	1.01432861467237	1.04270735398861	1.00702382887994	1.03583177993196	0
2005-11-01	0.0679658882783874	19.2068802323056	362191726	0.822429906542053	40.4231132296242	-0.247931998796959	0.120168439180968	0.242318429339104	-12477301.0248217	91.1484738229624	-2.42326455247414e-11	158257.813891114	-0.0514712428774886	43.9209033299738	231.238643634381	93.6199745496527	-0.091813568376069	-0.0456615826593656	0.3	-1.47043254243675	-0.0895697969197848	102.894293373668	-0.0330007171865145	-0.00415961689693674	-0.360857923464108	10578661.85	2.00529254450577	-0.441078238610942	-0.00942874981413409	0.0566702718896458	-104.691550025919	0.177570093457947	0.190888607325729	0.237404003461246	0.0978578150546935	-2.87466478201732	-194418152.831314	0.536067787530304	-2.85051666957127	-0.0028354813053779	0.993183671652422	1.03853400997151	0.997958876185867	1.02564945099846	1
2005-11-02	0.0675684269434264	19.2679496286888	366630418	0.766355140186912	42.5680062681648	-0.239352232887592	0.217897634640585	0.250195625179276	-9648073.7519336	93.2807958937892	1.24691510259623e-10	30827.151219731	-0.0493667360654502	48.4568845826722	230.037457824427	100	-0.038951210826213	-0.0500319345075319	0.3	-2.49958146542916	-0.0383425799661084	102.879389956224	-0.0422331707844836	-0.0117743276744461	-0.40683210511353	10552728.05	-3.16118273289777	-0.867274556673131	-0.00577382961765764	0.0566045203305692	-75.1233552631545	0.233644859813088	0.205140691488182	0.226649566136891	0.162122942190762	-2.95454173963285	-192028087.908238	0.429999925154376	0.279975548503606	0.0168935279161048	0.984280537749288	1.033525997151	0.997480033079277	1.02035361388348	0
2005-11-03	0.0677671576109074	19.5410842359082	362345242	0.850467289719623	40.2284317654022	-0.284668383250901	0.161034891771134	0.256267607502591	-7944595.66992965	91.7252042356195	-9.2127092670262e-11	-16602.1634615374	-0.0466915155416716	49.9060000708238	221.26235613967	83.9009663572294	-0.0500801282051271	-0.0570492884858388	0.3	-2.65384919224242	-0.0502654781059068	103.046379588475	-0.0492573121508315	-0.0192709245697232	-0.449786856818246	10356365.65	-7.69790754451509	-0.668342853949298	-0.00558539206522749	0.0565300199308072	-84.7429519071286	0.149532710280377	0.186604697752247	0.213301276675343	0.133211539906054	-3.18087607394912	-193288433.790591	0.236707415355293	-1.08590741611516	-0.025448533095747	0.975377403846154	1.03102199074074	0.988814116307363	1.01146791731622	1
2005-11-04	0.0657798509361004	19.839194264268	365472459	0.822429906542053	41.3848811996705	-0.327568175735985	0.222005432505771	0.254089495887188	-5911869.51317388	93.3470112420773	-1.08913198404109e-10	-40599.5885082786	-0.0474405772883302	52.055508232042	233.226851211784	86.4922628860672	-0.0667735042735089	-0.0317303780928401	0.3	-5.42492392915648	-0.0659264219635363	103.044387064666	-0.0563831878762442	-0.0266933772310274	-0.48404938155121	9840607.3	-12.6219818089126	-1.09941662091783	-0.00256091494489451	0.0560377527032973	-79.8269760125837	0.177570093457947	0.18359316298748	0.203398572112722	0.143982344736997	-3.26114975476859	-190729801.699682	-0.0159340922576756	0.380039510123775	0.00855500517964217	0.982054754273505	1.01321572293447	0.985819067804149	1.00571538158558	1
2005-11-07	0.0653823896011392	19.9645263725846	368595893	0.803738317757005	42.1879336546453	-0.293448973129244	0.2686338765485	0.249346451767489	-3958009.39205411	94.5790635937474	6.19574491302981e-11	21741.0620882315	-0.0431245548433012	54.6315192501738	256.21142284534	90.773348410912	-0.011128917378917	-0.0161393512130324	0.4	-9.67492260061997	-0.0112305825322404	102.940195174332	-0.0648870780922068	-0.0343321174032633	-0.507452150942744	9583129.05	-16.8517139089436	-0.410988601087201	-0.00119565889224599	0.0559852668940092	-62.4137287819436	0.196261682242995	0.187816002739319	0.198204382321588	0.167039243574781	-3.2458693409079	-188231054.499682	-0.220422520499661	0.283146512509518	0.00566294538386444	0.982611200142451	0.998469907407409	0.985677188365159	1.00202048120406	1
2005-11-08	0.0651836589336589	19.6977394398596	371875204	0.766355140186912	43.8449906537643	-0.277027195634393	0.333430258226411	0.237967172352436	-2232979.495222	96.3418640776131	1.07402562844371e-10	26937.7003205136	-0.0505795027028966	54.3350658894456	289.32855697765	95.7239150909789	-0.161369301994303	-0.00366844019006786	0.5	-5.96983428850612	-0.150084521520922	102.710387498901	-0.0703826288460165	-0.0415422196918139	-0.517320973698576	9383014.8	-20.2718465195916	-0.223383390010573	-0.00213977703632732	0.0556287150165321	-43.9700650226951	0.233644859813088	0.203092288430575	0.199833684357917	0.209609496575892	-3.11074705992456	-185960762.268913	-0.296195491285782	1.17699994021984	0.0112305825322404	0.985949875356126	0.989566773504275	0.989292241198805	1.00102082041534	0
2005-11-09	0.0627988909238914	19.4500087166149	369193752	0.813084112149531	42.2161006142073	-0.293495180796381	0.296469694452258	0.225638845337279	-1433710.9532578	95.7308285850751	1.73207653018043e-11	-403.445512820559	-0.0573210584228174	55.2243134215998	320.788782829927	96.7138957256899	-0.15024038461538	-0.000565972518729621	0.5	-61.1768722968314	-0.142279741149295	102.62024501436	-0.0763115154940661	-0.0484960788522644	-0.521251318692006	9169518.5	-23.8393322757103	-0.629324731299343	0.000280972762346097	0.0542057541858604	-44.3453972781826	0.18691588785047	0.197700154903873	0.199122507873236	0.194855448965148	-3.08027343589006	-186407670.93558	-0.364342336877539	-0.282347056665082	-0.0140580466107269	0.983167646011397	0.983724091880343	0.987065227513353	0.997673616729356	0
2005-11-10	0.0548496642246646	19.9225095521805	364824578	0.962616822429904	37.4246775931149	-0.271504218951548	0.134750635565678	0.224153224173564	-1853950.93182594	92.1305895438794	-3.1624577611495e-10	-115899.389022434	-0.0622256293830776	46.9186865734147	344.620863242259	99.1180985093842	-0.147458155270659	0.000569842702443125	0.5	-0.371324418718141	-0.145993656555536	102.91942634162	-0.0871347749859757	-0.0562238180790066	-0.534759474505031	8859680.9	-24.6965139647664	-1.39934568607447	-0.014521590728879	0.0291897592853046	-84.7316384180803	0.0373831775700958	0.144261162459281	0.180835392735251	0.071112701907341	-3.37790651686695	-189748803.994404	-0.320723507725833	-3.84972885133473	-0.0463617293072538	0.976490295584046	0.975933849715101	0.970741995217829	0.986841237437979	0
2005-11-11	0.0496826668701677	20.4620305216216	362200718	0.962025316455696	37.1409483572118	-0.243023471669902	0.159668398488588	0.229139542956156	-2056194.47678944	92.4764262088103	-1.59308502298276e-10	-100898.443064457	-0.062582325452915	20.8368956679459	368.276309679813	95.1865092873415	-0.105724715099719	-0.00747611851704435	0.5	-0.415394767450147	-0.107092032300413	103.12311355999	-0.0984095819068445	-0.0646609708445742	-0.552582208105168	8572854.65	-27.5605534798826	-2.6694319199028	-0.013188752138222	0.0292663437204148	-119.819819819823	0.0379746835443041	0.108832336154289	0.15683437387493	0.0128282607130056	-3.60135669075843	-190623423.994404	-0.430906286837736	-3.5389016112507	-0.00297023409179131	0.967587161680912	0.974820957977209	0.95893243057257	0.977472521773265	1
2005-11-14	0.0463042455229965	20.4342824540967	363879394	0.859375	40.0764317054925	-0.235353723044768	0.255727883151843	0.234769554645539	-1952003.70183912	94.5169388305387	2.49007674405527e-10	10361.294738248	-0.0595682436627911	27.7318590572979	390.314792590898	97.1604949152868	-0.063991274928773	-0.0112921049586226	0.5	-0.765666436065917	-0.0650545638728428	103.065761174439	-0.10539281371721	-0.0728073394191013	-0.564437988240218	8187328.45	-31.295702960206	-2.34175285550727	-0.00893167463184915	0.0291263670747642	-94.8365703458076	0.140625	0.119429890769526	0.144366212839795	0.069557246628987	-3.60525399452204	-190623423.994404	-0.426319289865641	-1.34547833323179	0.0176904940438531	0.960909811253562	0.971760505698007	0.956623846165189	0.97284236824184	1
2005-11-15	0.0421309015059025	20.3200485305823	366666068	0.777777777777767	40.5745331849071	-0.224484248782783	0.2857335222995	0.239134334051688	-1943133.54000577	95.1084191594681	6.25003150171664e-11	17887.9679709777	-0.0517030953228833	36.7968141523127	409.550146824408	95.8120918911467	0.00834668803418803	-0.0175246927594242	0.6	-1.27710379131972	0.00878035452558467	102.944388977851	-0.112052891491757	-0.0806564498336324	-0.569075014439135	8091107.1	-32.7555596122839	-1.57586578096069	-0.00579382965231846	0.0277382216719243	-70.8598051672991	0.222222222222233	0.153694001253762	0.147475475644451	0.166131052472384	-3.5469885368708	-191552315.327737	-0.418525074353816	-0.531389597013115	0.00291822714765654	0.952563123219374	0.969256499287751	0.956012199675178	0.969559920687897	1
2005-11-16	0.0403423254985771	20.2776674909121	369020446	0.583333333333327	43.1203759078981	-0.234179021625705	0.360096101182435	0.241658951453328	-1227525.70213532	96.8699924051827	-2.9590491051161e-11	20252.6319889625	-0.0460137930089817	45.9505083314211	440.867959038612	99.7136098728621	-0.0139111467236459	-0.0175760285093502	0.6	-2.9837920416301	-0.0142584965683417	102.672080318851	-0.116702532098023	-0.0878656662865106	-0.562224139814727	8003819.9	-34.5547053732889	-1.44766619724524	-0.00303505508645993	0.0277031630368947	-45.1274362818548	0.416666666666674	0.241351556391399	0.1787675025601	0.366519664053997	-3.34902937019887	-189197937.327737	-0.405959347546195	1.40773672531863	0.0144647456391937	0.949780893874644	0.966474269943021	0.960241484256387	0.969403581184426	1
2005-11-17	0.0345791361416377	19.8518763485025	372399947	0.392857142857182	44.1510436993703	-0.198366507832377	0.392920667176137	0.243293962221665	-518689.342121422	97.5349840632403	8.01680497900575e-11	25778.5957532053	-0.0400569686427024	58.5190927595967	474.6151391418	99.4320989830573	-0.00556445868945898	-0.0101751862396324	0.7	3.08954380678878	-0.00569519706044862	102.372019603503	-0.117570225771833	-0.093806578183575	-0.544834313577702	7921228.75	-34.1857903563171	-1.10587479859686	0.00226528485871915	0.0203438222892923	11.9477911646582	0.607142857142819	0.363281989975206	0.240272331698469	0.60930130652868	-3.11079064002219	-187749579.756309	-0.433922008782467	2.13899137984932	0.0057278182025152	0.957014690170941	0.966752492877494	0.964915826873679	0.970287386806941	1
2005-11-18	0.0339829441391951	18.492738482191	379959770	0.0999999999999081	49.1158176017804	-0.29836341740541	0.540851106628272	0.213672442682998	1103237.9356561	101.108852707216	1.04441812053072e-10	114568.353810558	-0.0357409461976735	57.3401492832464	506.352518159719	101.694082339992	0.00556445868946309	0.00143359290310484	0.7	3.68124565801751	0.0055683454271842	101.851330718649	-0.113876803298479	-0.0978206232065557	-0.51028861935567	7413905.65	-26.669950227724	-0.184880663111789	0.00157539174252341	0.0191602406694399	108.04924242424	0.900000000000094	0.542187993316835	0.340910885571258	0.944742208807991	-2.66216206896205	-182857929.579836	-0.32795710257574	3.89414785383701	0.0281570704037376	0.970369391025642	0.968978276353278	0.977306153100973	0.97606909930669	0
2005-11-21	0.0325918294668308	17.2306818920447	376513630	0.233333333333303	47.3043516196438	-0.098314111111157	0.541326397905671	0.148099035950608	1562959.73068535	100.706865548699	3.14471268647014e-11	85989.9032897182	-0.0310147232723321	65.6017369706701	532.142377255798	99.4416122521529	0.019475605413105	0.00881748814406226	0.6	5.13547109388199	0.0198490074947757	101.53867833793	-0.108541331469032	-0.099964764859051	-0.469413343721337	5692865.65	-27.0589566462921	-0.260606910599297	0.000984371976092889	0.0194323148654907	95.1937984496136	0.766666666666699	0.61701421776679	0.432945329636435	0.9851519940275	-2.37050423256963	-183350235.294122	-0.32495683891744	1.76186760495601	-0.0111678710281555	0.978159633190885	0.969534722222224	0.981856731459528	0.978776151828499	0
2005-11-22	0.0327905601343111	16.9117137935913	373523811	0.69999999999999	41.5309309948747	-0.051855996675345	0.243519330877864	0.104245281428511	863683.183896899	97.4094300299691	-2.69261521575083e-10	-77404.4387687039	-0.0301229830977391	58.2653503762406	536.52326218055	96.8853883623974	-0.027822293447294	0.0128068650078561	0.5	-2.66005468427579	-0.0288059880498141	101.63707431729	-0.105542439326663	-0.101080299752573	-0.439389486158026	4969491.3	-27.9855238463243	-0.395146887994814	-0.00304017489817515	0.0215690521850996	-27.3941068139972	0.300000000000011	0.51134281184453	0.4590778237058	0.615872788121991	-2.43149925812893	-186340054.294122	-0.277618855880709	-2.23804803872781	-0.0400999903649476	0.977603187321939	0.965083155270657	0.971906713423161	0.973908974650667	1
2005-11-23	0.0315981761294268	16.896101694677	375844267	0.49999999999997	44.6488623859359	0.0445435934202713	0.436584806027372	0.0758727380764636	954411.508934349	99.4856761493356	-1.83474285643431e-10	-38860.4127715437	-0.0294809301720325	60.8286702243084	563.272692049608	103.262410041712	-0.016693376068376	0.014229850008729	0.6	15.033304551622	-0.0170859606468283	101.528956393756	-0.103416284120952	-0.101547496626249	-0.410392906649137	4411846	-29.8115246910752	-0.613397906629904	7.13828454056748e-06	0.0212193562468316	-39.3650793650777	0.500000000000031	0.507561874563031	0.475239173991544	0.572207275706004	-2.31673725434546	-184441499.385031	-0.250194989317607	-0.760079020247072	0.0173829727868502	0.977603187321939	0.963692040598292	0.970837826755042	0.972961898063056	1
2005-11-24	0.0325918294668302	16.0616414744502	379354813	0.366666666666636	46.689865097152	0.113276265066647	0.651810658373867	0.0597675529092249	1132787.50303587	100.815861380377	2.29321368577423e-10	38902.4105235057	-0.02830383314157	67.9478269111656	585.228592614981	104.75943937231	-0.016693376068376	0.0110866620837247	0.7	11.1289173789179	-0.0168935279161048	101.320539506172	-0.0967452911938311	-0.100587055539766	-0.37837162691533	4086694	-28.9680787917299	0.115628109281053	0.000214052800346579	0.0213233741490687	33.7984496124017	0.633333333333365	0.549485694153142	0.49998801404541	0.648481054368607	-2.10985523273222	-183563862.885031	-0.212609318641264	0.189659364801446	0.0114230152629638	0.97871607905983	0.967865384615386	0.973834874769268	0.974210456742086	1
2005-11-25	0.035175328144079	15.6052419631653	393116068	0.051282051282061	54.7719292026161	0.315039320444947	1.3317129944703	0.0699425184029167	4231014.16538972	105.515585408216	1.35845402951381e-10	364116.995526182	-0.0256464474212836	74.2074862116186	614.52959105103	108.182970088953	0.0472978988604001	0.0070666574163169	0.8	2.85798275411557	0.0470123057883134	100.692569217802	-0.0991481572448863	-0.10029927588079	-0.327031784710397	4264136.65	-10.9734551158234	1.48292399715572	0.00345920146859017	0.0253045004204719	163.492063492064	0.948717948717941	0.682563112341408	0.560846380144076	0.925996576736073	-1.51674623743991	-172195869.624162	-0.0132412530046836	4.32118770466852	0.0498477870936913	0.984280537749288	0.977324964387466	0.992526282847129	0.984337482607679	0
2005-11-28	0.0347778668091174	15.1814424169723	388459610	0.28205128205125	50.6381697823556	0.261932393489158	0.894323686808129	0.0776724839369806	4403196.2199569	102.832949525142	7.31446961560932e-11	286283.703926298	-0.0141965035795125	66.6309945720325	629.697527586238	105.245151871158	0.066773504273509	0.00450991274310972	0.7	7.88566991798722	0.0687607096313172	100.444334282639	-0.10136618744586	-0.100512658193804	-0.274903366729939	4042207.9	-11.2992336523758	0.350621733934402	0.000915860767973858	0.0262289874842266	137.716615698272	0.717948717948752	0.694358314210523	0.605350358166225	0.872374226299119	-1.23821073809015	-175159070.169615	-0.0241213201564396	1.73705308422263	-0.0246133254642499	0.987062767094019	0.982611200142452	0.996640533531516	0.988070492115427	0
2005-11-29	0.0345791361416364	14.6084929883451	385293843	0.30769230769228	50.1849562350397	0.224045619130637	0.815822822305065	0.0825354861390822	3728245.46183151	102.431574304611	-5.37934733626425e-11	-62702.9483284272	-0.00360263030535068	65.9990830424389	627.050929851917	103.446552110628	0.066773504273509	0.00976633218708966	0.6	4.90832754402335	0.0689583554369562	100.278479951747	-0.0999893176686307	-0.100407990088769	-0.225567714430275	3976890.45	-13.757192914152	0.166036925457917	0.00171521401676867	0.0259093477368221	105.075827917056	0.692307692307721	0.693674773576256	0.634791829969569	0.81144066078963	-1.028385546682	-176598055.169614	0.00656458309763597	1.26520335832922	-0.00277258828615233	0.997078792735045	0.987340990028493	0.998455957539531	0.990618912740905	1
2005-11-30	0.0331880214692717	13.9832198377502	388942410	0.153846153846187	52.908316122006	0.233850990721725	0.983012311346377	0.0871011497241161	3829108.30140463	104.01961175107	-2.33376011440711e-11	26049.5055978342	0.00453004008693514	72.9756368780845	626.987033989993	104.569156421323	0.0667735042735029	0.0146419336670234	0.6	1.77945551115784	0.0677892414598212	100.005798608342	-0.0940099728293391	-0.0991283866368831	-0.174140143659096	3937384.2	-14.9387773072549	-0.180239487457373	0.00614107507277997	0.0223006409180267	97.3415132924289	0.846153846153815	0.744501131102109	0.671361597013749	0.890780199278829	-0.718254530425266	-173612863.987796	0.0350594922220087	1.80719182719554	0.0165213800667181	1.00709481837607	0.992349002849005	1.005230698901	0.99573914344691	0
2005-12-01	0.0329892908017909	13.4026090550549	386303045	0.277777777777836	50.9101024972902	0.24663121417029	0.816435756484717	0.091426732933963	3377404.93387359	102.693705435337	3.5193920325564e-11	15766.8130119165	0.0102193424008367	72.7177143590844	620.710206609128	100.555287092755	0.0528623575498529	0.0167594366508233	0.5	1.9598408338921	0.0538871448216904	99.9018832046399	-0.0874204893835582	-0.0967868071862182	-0.128108071598731	3855093.65	-17.524075643624	0.00589184192319436	0.00557265080570421	0.0226493187012368	81.481481481476	0.722222222222165	0.737074828142128	0.693266007389875	0.824692469646633	-0.55661913460181	-174272705.237797	0.0470885409308202	0.0460395768869328	-0.0109838694904743	1.01265927706553	0.99568767806268	1.00603755401567	0.997904983592019	1
2005-12-02	0.0323930987993488	12.7581299091217	390626776	0.20588235294122	52.3632381396735	0.240862806530887	0.871324224080902	0.0951880689984737	3431755.69189593	103.35386172186	-8.05637551689447e-12	3357.77939147277	0.0141608339725363	73.974845381191	622.110939228884	102.526854511309	0.0472978988603959	0.0126730823466467	0.5	2.0681170057878	0.0476715910859926	99.7550571734983	-0.0753453953064973	-0.092498524810274	-0.0847686671926029	3914919.35	-16.6038474859479	0.946113299459201	0.00488946599088764	0.0223933762491767	77.3345995568174	0.794117647058782	0.756089101114346	0.714207038631365	0.839853226080307	-0.357060022829092	-171870632.46002	-0.0817157342318976	0.274593976559136	0.00824919190349595	1.0098770477208	0.997078792735044	1.00935768677018	1.00119461426242	0
2005-12-05	0.0349765974765973	12.903676085769	386162659	0.823529411764711	42.8101550687031	0.155278208199732	0.248904527578818	0.0954346094104315	2073296.79462898	97.5483530533044	-3.29460904377696e-10	-112367.65491452	0.0123416840163674	67.65964627413	614.468335936506	100.584497863497	-0.0166933760683761	0.00667456401080223	0.5	11.7538482969985	-0.0172828279702745	100.156869588516	-0.0714757544446563	-0.0882939707371505	-0.0668924069077148	3981953.5	-15.4595989122605	0.471222664408975	0.000573086411036753	0.0279389652741627	-57.3265651438272	0.176470588235289	0.56288293015466	0.66376566913913	0.36111745218572	-0.664102739504302	-175864842.407389	0.118150966027853	-4.35377822133852	-0.0592266008537519	1.00041746794872	0.993740117521369	0.992095503193415	0.99326307276741	1
2005-12-06	0.0381562881562879	12.5315325018848	391143248	0.411764705882366	49.4334461279165	0.141264268767631	0.663709318314787	0.0955543285201663	1717031.89505962	101.516336550846	7.77096858089974e-11	-33412.0857260441	0.0113429350208232	68.9970081683844	592.611902909628	102.872126758856	-0.00556445868946309	0.00111366620786301	0.6	4.63431571018323	-0.0055683454271842	100.113451719792	-0.0646935136359615	-0.0835738793169127	-0.0511341023775258	4067017.4	-13.492786584119	0.749271583448344	0.00243788836763516	0.0297571606019567	-5.98988720342325	0.588235294117635	0.571333718142319	0.63295501880686	0.448091116813236	-0.585389950776594	-174470277.487389	0.280471551174108	-0.324668655414707	0.039871552946828	0.999304576210825	0.998191684472936	0.993571117750975	0.99385566805808	1
2005-12-07	0.0387524801587298	12.1859706025638	395229457	0.264705882352996	51.5897924771533	0.173896919318565	0.794195895441112	0.0977293797454391	1989035.25064817	102.787809110576	1.0419046283902e-10	125421.91256009	0.0117888051081194	69.3872204888289	581.213353974093	103.123455593184	0.0194756054131021	-0.00474100122271248	0.6	3.97728368397735	0.0194626801733836	99.9583547840387	-0.0586470013006074	-0.0785885037136516	-0.0323828896282685	4137255.25	-13.3402486516854	0.189889579896523	0.00302470552323963	0.0299080010885484	46.892655367226	0.735294117647006	0.625987184643881	0.6306324074192	0.616696739093243	-0.405541925170083	-172018552.087389	0.216384452494262	0.926335791774173	0.0138631545724124	0.997635238603987	1.00236502849003	0.99919190969723	0.996869818154746	1
2005-12-08	0.0373613654863651	11.3501015580711	395229457	0.264705882352996	51.5897924771533	0.199433414475404	0.763282477896799	0.0965170006863287	1591581.76011375	102.411004005007	1.10506199223428e-10	28421.9264712366	0.0161226623566401	67.4208674594965	559.151674944998	98.1089976356199	0.0584268162393131	-0.00724690097986361	0.6	8.49225991168386	0.0595626705383312	99.8449015233238	-0.0511394465216217	-0.0730986922752457	-0.0128913236078332	4093917.95	-14.1384677601106	-0.769391334946397	0.000984903549434226	0.0289924910004881	74.5186862967198	0.735294117647006	0.662422828978256	0.641229214605552	0.704810057723663	-0.26019448246043	-173419523.287391	0.0775504553471935	1.0667684392205	0	0.998191684472933	1.00542548076923	1.00293910432807	0.999335940961108	1
2005-12-09	0.0389512108262103	10.896227213023	402702315	0.111111111111133	54.7246268584711	0.238577943062943	0.946634443619915	0.0910591066750043	2179418.79806221	103.88691138803	2.33067459397908e-11	72769.2168581023	0.0189762309153367	69.5192191329154	553.838716242181	102.491873391745	0.0612090455840461	-0.0044472357272434	0.6	3.58071732567009	0.0612708023566551	99.5970357134019	-0.0433533253887948	-0.0671496188979555	0.0129872133141085	4336367.85	-7.73403498991666	0.774022758933834	0.00315492118114732	0.0291544152753011	96.2097059865447	0.888888888888869	0.737911515615127	0.673456648275411	0.86682125029456	0.0116104683131724	-169932189.554058	-0.0466664527310608	2.63395718452173	0.0190911046051741	1.00097391381766	1.00542548076923	1.01192910255299	1.0048946969687	1
2005-12-12	0.0387524801587295	11.0241652421901	409143484	0.190476190476153	55.6091071819038	0.209911928208018	0.948078394434179	0.093182974801678	1851255.18610591	104.010350919735	1.093610199526e-10	90690.026264267	0.0214731034041966	75.3374371679551	550.178834854295	103.331722556534	0.055644586894589	0.00793707165540038	0.7	1.93485549903787	0.0552361078822132	99.3754064885323	-0.0361661366508006	-0.0609529224485245	0.0430667867696855	4574492.5	-4.52621556085577	0.767497194929103	0.00634845615469753	0.0264706340222893	146.556473829197	0.809523809523848	0.761782280251367	0.70289852560073	0.879549789552643	0.267607633018185	-171418613.169441	-0.0133518043192061	2.85576855077078	0.00538832078852192	1.01655439814815	1.00848593304843	1.0197772542661	1.01045448982754	1
2005-12-13	0.0379575574888072	10.9156450075456	409143484	0.210526315789432	55.6091071819038	0.257762515547063	0.916466714909078	0.0913026275990007	2322151.18042719	103.590573845178	-7.36428326030304e-11	17920.8094061659	0.0200106495178645	73.6859583104408	548.579007783557	101.638565057456	0.00556445868945987	0.0122224801678579	0.8	2.13812737730766	0.00538832078852192	99.2240108429511	-0.0303878791525689	-0.0548399137893334	0.0735898061084539	4619106.1	-6.38798123416436	0.460862580024715	0.00509596073291891	0.026315001851021	111.077844311379	0.789473684210569	0.771012748237768	0.725603266479742	0.861831711753819	0.464118566587501	-167739667.169441	-0.0663336707652098	1.54612620516756	0	1.02434464031339	1.01182460826211	1.02500935540817	1.01500341125749	1
2005-12-14	0.0405410561660558	12.6464390700978	423623791	0.16071428571426	62.7774747073448	0.257882528109498	1.25271000797195	0.105442808142585	3858594.7175557	107.707762645237	2.3253982495694e-10	342444.047976772	0.0231852445394144	77.5171848441517	537.752923770654	107.454979214856	0.07790242165242	0.0198192671387814	0.8	1.77365064600293	0.0746666981480036	98.7352049386171	-0.0203457148785051	-0.0479410740071677	0.119437000975631	5225402.55	7.94888477471451	1.41701800745446	0.00753803548253221	0.0284533896993926	259.193205944801	0.839285714285741	0.793770403587092	0.748325645515526	0.884659919730225	0.982280735013341	-162247136.928061	0.199325456835477	4.7084266695967	0.0446650518952318	1.03881223290598	1.01822373575499	1.04426338912302	1.02732487403844	0
2005-12-15	0.0383550188237681	14.2536049853249	410551512	0.28571428571429	58.5825113547915	0.127922687802163	0.968395997712539	0.116652735471992	1469116.26328301	105.30414011033	2.48704610206191e-11	215148.77414973	0.0251827425305016	60.6951423592458	508.172512070542	104.655314388606	0.0612090455840399	0.0243919221080666	0.8	3.46281704013806	0.0592887465940919	98.5616649678341	-0.00914986600224932	-0.0401828324061841	0.163974588393656	5710041.45	15.1895978859748	-0.0513631535223595	0.00260247102518673	0.0262189148219048	177.893245158236	0.714285714285711	0.767275507153299	0.75464226606145	0.792541989336996	1.22123852772464	-173140702.761393	0.235946202879131	1.95638655204638	-0.018150539840064	1.04938470441596	1.02378819444445	1.05060754312854	1.0338650516932	1
2005-12-16	0.0375600961538457	15.3933129516968	416242236	0.267857142857143	59.0039678946965	0.108216160587288	0.931402401154771	0.124402950160584	870782.938515872	105.246185523226	-5.23695763275391e-11	-119378.824174262	0.0242018283384497	59.7323035940592	518.269467032195	111.331476102463	0.0472978988604	0.0263314464289039	0.8	2.14892100722679	0.0453805580262243	98.4377345205296	0.00161279901348355	-0.0318237061222505	0.205184195201658	5616586.5	12.0841574618236	0.200582407528158	0.00452600648246295	0.0250543612963727	116.476034858385	0.732142857142858	0.755564623816485	0.754949718646462	0.756794434156532	1.41410766929968	-170701821.047108	0.170223835758851	1.3221425495596	0.00261319149885048	1.05661850071225	1.02879620726496	1.05576438891381	1.03972196601886	0
2005-12-19	0.0369639041514042	16.331220888714	412141540	0.303571428571436	57.7385054741886	0.111946455581471	0.84505919577119	0.129326312753612	546848.12942785	104.3386139201	-7.55071834310654e-12	-3492.62709223617	0.0237916278581374	58.9228351507109	535.109766325307	106.421459100242	0.0528623575498601	0.0212278587667465	0.8	2.23629597824551	0.0511311978536339	98.4191325545009	0.00983542558509587	-0.0234918797807813	0.238855819397488	5649314.3	7.61258267454455	0.258761351091206	0.00435094848537358	0.0251177333138305	89.6491228070157	0.696428571428565	0.735852606353845	0.748584014548923	0.71038978996369	1.504655179892	-170701821.047108	-0.0321572649132185	0.307011580294292	-0.00523322966306474	1.06162651353276	1.03909045584046	1.05734746654083	1.04350226706904	1
2005-12-20	0.0377588268213269	17.8267668947433	421523129	0.124999999999965	62.1137681807959	0.167671587093731	0.99918629506564	0.131910479617093	1488370.18634453	106.36260228998	8.0447780472007e-11	119099.584334965	0.0245763592117794	61.8023471956769	547.547889488867	107.709801995544	0.0723379629629701	0.0223159811736979	0.8	2.06335261926877	0.0687785127275917	98.2116735059169	0.019351701197551	-0.0149231635851148	0.274957046767077	5968902.8	10.205745137877	0.944414663890102	0.00503495718929409	0.0256043538874547	117.757009345798	0.875000000000036	0.782235070902575	0.759801033333474	0.827103146040779	1.77019703976329	-166323746.180438	-0.143562749607514	2.08782406892075	0.0258965067774537	1.07219898504274	1.04827181267806	1.06767694944128	1.05165383946416	0
2005-12-21	0.0393486721611724	19.6427555007014	410292825	0.245901639344257	60.1034507931807	0.0646299218092592	0.88298398809426	0.132771870598771	-814860.194678962	104.976011729196	8.27133455337446e-11	83640.7390714238	0.0299624698663195	68.0253432603782	542.406262854085	106.883751781736	0.122418091168094	0.0153177505873904	0.7	1.99363119309702	0.120306333451675	98.1577369631774	0.0264238144738298	-0.00665376797332588	0.306027156614253	6414395.2	13.8712874896743	1.4480774808081	0.00526742480509836	0.0254626980062318	118.297872340433	0.754098360655744	0.772856167486965	0.764152744717971	0.790263013024953	1.89178107875663	-176150262.180437	-0.0476656599356154	0.604740050658034	-0.00769878012966863	1.07164253917379	1.05522738603989	1.07178104203018	1.05680572814485	1
2005-12-22	0.0391499414936922	20.8293156433322	410292825	0.245901639344257	60.1034507931806	0.0665467655834628	0.850481012292134	0.130277406969522	-1416760.53088346	104.467481001257	-1.02125899813584e-10	-46867.9220085572	0.0326376903900978	63.197853012314	539.239882970094	104.862577508405	0.0834668803418831	0.0119055615246693	0.7	2.10571913316568	0.080434780504847	98.1506333624291	0.0325238837527442	0.00118176237188813	0.330821404347703	6481417.15	9.6852144148292	0.115063090186386	0.00467575978804621	0.0254834578638321	74.1046831955976	0.754098360655744	0.766603565209892	0.764969684881945	0.769871325865786	1.9638798436459	-174937515.930437	-0.0684084008503496	0.648215770017611	0	1.07498121438747	1.06218295940171	1.07451710375611	1.06102090979269	1
2005-12-23	0.0367651734839241	22.3148808264836	417601891	0.131147540983635	63.3163387354333	0.00147739710823406	0.934593557799752	0.138594388590625	-849902.753683895	105.994784971596	6.35440981926141e-11	71174.2426771537	0.0352415716999088	68.5526497575694	546.442752411115	106.179904301118	0.08903133903134	0.0115748466831806	0.7	1.15396789111824	0.0844441052715766	98.0260622078123	0.0375126640075731	0.00844794269902513	0.355927758601382	6158807.7	8.95543729337392	0.493044061007582	0.0100714721203818	0.0182850088846221	100	0.868852459016366	0.80068652981205	0.776875299858647	0.848308989718857	2.14329122502066	-172013889.530439	-0.12133190083701	1.89081059724104	0.0178724793391419	1.08165856481482	1.06913853276354	1.08283301337777	1.06801071394331	1
2005-12-26	0.0345791361416368	24.2148013193173	433474694	0.0740740740740266	67.3601845055694	0.068829026461898	1.03049853917346	0.153176287602615	981001.582973063	108.039484443942	6.02281031046596e-11	291983.134125746	0.0401639774636611	71.9525593147712	543.618417738662	108.866819214649	0.11685363247864	0.0152449076113876	0.7	1.1661406515841	0.109434532509702	97.7561650971476	0.0451139389217399	0.0157811419435681	0.388129733745712	6719624.95	16.8568844376038	1.15905898436545	0.00897348724700767	0.0166985208100942	148.919226393628	0.925925925925975	0.842432995183358	0.798727864966884	0.929843255616307	2.46449869129608	-165908965.299664	-0.100141382620899	3.49078135388516	0.0249904272381252	1.09501326566952	1.07831988960114	1.09765105094131	1.07878824342059	0
2005-12-27	0.0339829441391953	25.9790132055199	427881332	0.139999999999965	65.0436810180481	0.0839653098340688	0.919183927970494	0.161160950342713	1808814.02554682	106.642376727989	-9.6874832858371e-12	197465.867610447	0.0426608499525207	67.2960454979319	556.441771844678	103.340407734485	0.08903133903134	0.0131388099504687	0.6	1.26777705154507	0.0829116551099592	97.6634271216016	0.0544846944418954	0.0235218524432335	0.417891115188751	6841004.7	12.5771754269769	0.313962892150293	0.0074474930219073	0.0171771175282695	124.724220623504	0.860000000000036	0.848288663455584	0.815248131129784	0.914369728107185	2.62141668790441	-165109913.585378	-0.0898177271932524	1.81431208765677	-0.00743177279456846	1.10113417022792	1.08666657763533	1.1047475133056	1.08608864244125	0
2005-12-28	0.0333867521367538	27.2131940954675	423010585	0.199999999999981	62.7208051693111	0.0666373505439242	0.831798540882346	0.164558988716607	2129312.37877071	105.385796653101	-3.33741010691403e-11	-43670.326689379	0.0428213631839474	63.401248839261	584.369520566573	104.448235061738	0.0751201923076901	0.0160814506176033	0.5	1.36383473959858	0.0700359164806289	97.7000448305524	0.0612084638372262	0.0310591747220321	0.439564015681881	6902113.7	8.24320237086317	0.329790871149546	0.00691467466788519	0.0175378080274591	93.6247723132941	0.80000000000002	0.83219244230373	0.820896234854433	0.854784857202323	2.6501059024594	-164414092.585378	-0.319196772974056	0.714873145373495	-0.00748741784080835	1.10725507478633	1.08944880698006	1.1066962588704	1.09054411654284	1
2005-12-29	0.0327905601343115	28.665722664077	430970373	0.113636363636311	64.9664373550768	0.0872742741376394	0.86992816708569	0.168134411237318	2716491.30922902	106.117507906446	4.08445055722778e-11	35037.5865273415	0.0442481474632959	63.7756360091793	605.510672848345	105.480538180916	0.08903133903134	0.0184458591897736	0.6	1.38319061643496	0.0824839812461497	97.6627018136619	0.0676290378440494	0.0383731473464355	0.45814297775435	7168134.85	7.9301159780095	0.0631248433077722	0.00643262891203063	0.0172625386458157	108.487778673109	0.886363636363691	0.850249506990383	0.83068065889975	0.889387203171651	2.74275485002695	-161760829.918708	-0.272014298752393	1.29487997174457	0.0124480647655208	1.11615820868946	1.09556971153846	1.11263247148815	1.09671880384844	0
2005-12-30	0.0323930987993508	29.8733622957834	425331444	0.295454545454536	58.8573355257633	0.0379887567447254	0.717095458855063	0.167282019264537	1603294.0131377	103.595485187689	-2.26502589569775e-11	-7390.28556802082	0.0411627264592047	58.6036092915139	605.863617018123	103.935210195632	0.0194756054131	0.0156960820745431	0.5	1.81197235365088	0.0178269621288725	97.8436352969936	0.0679912628531963	0.0442967704477877	0.463959104834322	7233894.75	5.13297796737005	-0.133015891521445	0.00463289199477667	0.018636891327066	68.2492581602373	0.704545454545465	0.801681489508744	0.821014269102748	0.763015930320736	2.61923731479636	-166374499.100526	-0.191600551067232	-1.04078014401716	-0.0199919672220454	1.11671465455841	1.09918660968661	1.10917066831404	1.09772394168796	1
2006-01-04	0.03517532814408	31.4413737989758	440776512	0.108695652173938	65.0509772690634	0.112943256826836	0.918199908872624	0.15553321831587	3200124.79231369	106.338728458019	4.20993426924655e-11	238046.87499998	0.0433742420921945	65.4639308920152	603.636458074216	104.857172938016	0.07790242165242	0.0109350988759575	0.6	1.53867458571204	0.0707054490591199	97.7225106272913	0.0732480301638527	0.0500870223910007	0.473636020573287	7782942.3	12.8076436146872	1.43466343096687	0.00715703512088062	0.0202816331456265	117.152103559867	0.891304347826064	0.831555775614517	0.824528104606671	0.84561111763021	2.77577796008051	-158284225.386242	0.0218906156474026	1.82040520392797	0.0347279470901833	1.11949688390313	1.10725507478633	1.11984653647336	1.10562836552506	1
2006-01-05	0.0315981761294279	32.9894596930001	456162098	0.0750000000000138	66.5981568950476	0.139581861193964	0.951382477905671	0.149709292062841	5239626.54150301	106.601907946764	3.87402605109691e-11	386414.50765671	0.0448902003890024	65.9890510440236	626.519332986717	106.69802634513	0.08624910968661	0.0111173135289524	0.6	1.7835759929275	0.0777969718992432	97.5922135824512	0.0791705189678164	0.0559037217063638	0.486971378602608	8303192.15	17.6160713081346	0.0606415087061336	0.00459092113899015	0.0170478838552867	140.000000000007	0.924999999999988	0.862703850409674	0.837253353207672	0.913604844813679	2.94390119829757	-151290777.204426	-0.0393348547200317	2.43194241308107	0.00970471433897377	1.12617423433048	1.1136542022792	1.13067342103922	1.11411906091522	1
2006-01-06	0.0327905601343122	35.0221259762274	480028497	0.163636363636395	69.8340213564149	0.0858488423083021	1.02788214488393	0.155317657623304	4372443.86752525	108.08379463833	6.3246073473471e-11	384420.538138773	0.0478864473756344	78.2161677653521	632.497826494675	109.016573926137	0.11685363247863	0.0141610534854963	0.7	1.34546524394193	0.10452746569797	97.3572915171716	0.0852794846356435	0.0617788742922198	0.508352177607607	9292201.65	26.3975501489958	0.601977688932667	0.00742783584591173	0.0162894849305469	191.164658634539	0.836363636363606	0.853923779060985	0.842810161825443	0.876151013532069	3.21756964150677	-156064057.004433	-0.0443542727760857	3.75963771686328	0.0214972641356624	1.13952893518518	1.12339200498576	1.14623803211732	1.12561873243491	0
2006-01-09	0.0333867521367536	36.7643200388917	469006396	0.199999999999974	68.251661386865	0.0897555525904205	0.946581725895759	0.154799297539563	3620192.42203298	106.782040835401	-2.45804320277585e-11	268142.067585916	0.0489565355851453	74.8786837654097	633.468645073182	106.579379423216	0.0834668803418799	0.0142866120245871	0.6	1.41846563370314	0.0738935674348249	97.2740758706794	0.0913465651512892	0.0676924124640337	0.529101425557754	9668185.3	23.4397288015705	0.661064958093155	0.00690335037408005	0.0165720718382251	144.075021312876	0.800000000000027	0.835949186040666	0.840523169897184	0.826801218327629	3.35013805862128	-156064057.004429	-0.00993488864738201	2.34908706506011	-0.00473739148569169	1.14898851495726	1.13257336182336	1.15475961993956	1.13401583482566	0
2006-01-10	0.0365664428164443	36.0484047619573	447579653	0.423076923076941	60.1754946267051	0.0915008607533775	0.748040915271206	0.144576696060376	4369360.38895833	103.468508045707	-1.0241952479254e-10	-358543.635093957	0.048920865978161	66.5979082255838	625.380882694847	101.234037575871	0.0612090455840399	0.0173170981561584	0.5	1.81013577859167	0.055127760575549	97.4817509977861	0.0939507001790993	0.0729440700070468	0.535407070484251	10365879.55	27.3233319145642	1.65348309933286	0.00541064262479641	0.0185688974961979	43.9999999999996	0.57692307692306	0.74960714966813	0.810217829820833	0.628385789362726	3.19593373800682	-150962451.528241	0.158296531010982	-0.565646443899107	-0.0264645869889445	1.15677875712251	1.13674670584046	1.15023917089038	1.13532173263773	0
2006-01-11	0.0365664428164443	35.3836262905183	437830371	0.551020408163239	56.8807671480799	0.0693485750495147	0.637595296062802	0.136135325704706	2777169.48213211	101.783587761039	2.38196006434371e-11	-395689.468427304	0.0485820047118155	60.6775897889579	601.180110010411	100.745945695631	0.0472978988604	0.0149478976080965	0.4	2.78500236441026	0.0428629065772671	97.7799999537589	0.0997787993982835	0.0783110158852942	0.525819685014417	10531285.2	22.7412694082228	0.0384444896163387	0.00266602249144112	0.0180876672912505	32.2889469103643	0.448979591836762	0.649397963724341	0.756611207788669	0.434971475595685	2.93970257475762	-156812020.728241	0.157432778914243	-2.13361735360441	-0.0122648539982819	1.15399652777778	1.13674670584046	1.14258848928305	1.13386089507966	1
2006-01-12	0.0351753281440793	34.6544781696005	444550900	0.44897959183676	59.2816693887571	0.0825965251348976	0.719473425204547	0.120677177919953	3401440.21435574	102.550165454734	-4.14653079482658e-11	-21066.7136863312	0.0449972092099524	55.3451634172332	583.205909058926	102.755690169517	0.0417334401709399	0.0111118076657786	0.5	2.10984971618624	0.0372552812364071	97.9378275981009	0.103232424515794	0.0832952976113942	0.510118752898014	10683364.35	16.8937892380887	-0.513448967056362	0.00409527936195246	0.0179985153588733	16.3355408388478	0.551020408163241	0.616605445203974	0.709942620260438	0.429931095091048	2.803810593983	-150091491.728241	0.171962443781438	-0.925909417602187	0.0122648539982819	1.15177074430199	1.13897248931624	1.14212508378604	1.13519496375464	0
2006-01-13	0.036963904151405	34.4328003706357	436554227	0.659090909090907	54.6904536919889	0.033696323407771	0.55377192821738	0.116814549521912	1988563.82120226	100.623948571783	4.93681317793577e-11	-31124.8914930558	0.0397181073763635	54.1764053678407	549.805237949219	99.7525818382084	-0.00556445868946009	0.000487835756862839	0.5	2.90412514843299	-0.00494837333312721	98.2331642560865	0.103852174459901	0.0874066729810956	0.483253184622368	10359182.65	12.8539902712581	0.499843803067495	0.00287628463901021	0.018854763216126	0.542005420062042	0.340909090909093	0.524706660439014	0.648197300319963	0.277725380677116	2.52733832888057	-155265809.551769	0.324766242390687	-2.18354358884779	-0.0172132273314091	1.14064182692308	1.14008538105413	1.135324278317	1.13274545532269	0
2006-01-16	0.0375600961538472	33.1379667404652	426783806	0.976190476190469	47.8490050289984	0.0493352356919604	0.280878094693776	0.112648350752098	-599672.850061625	97.5194705853192	-1.06956293602979e-10	-240971.336082142	0.0341714834903966	49.0202218735151	531.034019377615	98.7379284369486	-0.03060452279202	-0.0111393294254384	0.4	-115.832018928205	-0.02773235365303	98.7318337300958	0.101856039628557	0.0902965463105879	0.438433385796366	10194089.75	10.7774888441531	0.290244060800942	-0.000537784529907072	0.0201799425419421	-147.425474254727	0.0238095238095313	0.357740948229187	0.551378516289704	-0.0295341878918489	2.04516823002352	-163082146.351769	0.224981622817545	-3.85081091982173	-0.0302157531144713	1.1239484508547	1.13646848290598	1.11966149062539	1.12467099348987	1
2006-01-17	0.0373613654863664	31.6357943434548	432238671	0.800000000000031	50.6207573064013	0.047718603602963	0.369385714470926	0.105146366948332	-1081016.9766629	98.6061817511915	-2.76717393501315e-11	-125159.598413023	0.029944635062827	45.5097887134519	515.979995619374	96.5868147757608	-0.00834668803419003	-0.0181965908223451	0.5	-7.76949032143098	-0.00754390245652463	99.0216902038556	0.0995854183465881	0.0921543207177879	0.388925626037318	10182296.8	5.72949223056446	-1.06809927045955	-0.00143230391751466	0.0192000420869908	-118.483904465213	0.199999999999969	0.305160632152781	0.469305888244063	-0.0231298800297839	1.74297470039908	-160984121.351769	0.216982187569903	-1.61420882033107	0.0127010333556971	1.11615820868946	1.13646848290598	1.1138566810722	1.12059391503095	1
2006-01-18	0.0389512108262114	30.8305055111053	438950275	0.599999999999983	55.232950348636	0.066638574646963	0.564354383505468	0.0938853727224041	-146024.653764099	100.545940864162	1.21101306528282e-10	121971.210881858	0.0264311787749314	49.5181754473998	501.049174870611	97.8270004981098	0.00278222934473016	-0.0169502489851988	0.5	7.73402241956496	0.00247112586985604	99.0641653264383	0.0989875837334713	0.0935209733209246	0.346803647853422	10312842.2	2.52241707893011	0.182257431109498	0.000719232767497691	0.0201438526942873	-40.8759124087625	0.400000000000018	0.336773754768527	0.425128510418884	0.160064243467811	1.66503821482886	-156957158.951767	0.06522432389846	0.829516077309396	0.0224630930919014	1.11615820868946	1.13507736823362	1.11833349607092	1.1218108624923	1
2006-01-19	0.0399448641636143	30.3565460979781	446909378	0.488888888888926	57.6022399178483	0.0716318103984144	0.681724697738276	0.0886071099696826	1548915.00206202	101.547320599243	6.41897470557309e-11	139389.622006315	0.025610777814306	53.6106975990696	505.509864809246	96.9279779652273	0.03895121082621	-0.015953175515481	0.5	3.83713026509082	0.0347279470901833	99.0067835213842	0.0995058246077976	0.0947179435782992	0.315188262297594	10241717.9	0.953672047859631	0.491068991642164	0.0021335065328562	0.0202203820108771	7.99086757990382	0.511111111111075	0.39488620688271	0.415047742573493	0.354563135501143	1.68372748306862	-151651090.285101	0.0693844367691181	1.86254863884339	0.0122648539982819	1.11615820868946	1.13396447649573	1.12595508831129	1.12533584618316	0
2006-01-20	0.0405410561660564	30.1190713582826	440680285	0.599999999999983	54.4961760490546	0.112207648724084	0.523233137772118	0.0851527824704398	1568532.47289209	100.098820564702	2.79604113873697e-11	12033.2114716832	0.0209202244959485	49.0816174834621	498.427507307943	96.2010954673067	-0.0139111467236399	-0.0104588431969592	0.4	11.1008567249405	-0.0122648539982819	99.0866509299676	0.0952758126776339	0.0948295173981661	0.286118256810441	9991657.35	-1.84453906561041	-0.245171630009883	0.00036809141597626	0.0203219407588195	-2.80112044817202	0.400000000000018	0.396590804588479	0.408895429911822	0.371981553941794	1.57986046598817	-153727454.618433	0.0546357021359365	0.829516077309396	-0.0122648539982819	1.11727110042735	1.12895646367522	1.12639910089699	1.12569062434411	0
2006-01-23	0.0405410561660557	29.4358458139695	433602954	0.711111111111121	51.5052401213512	0.0954168489880737	0.342292861891514	0.0764448914926056	971066.651329949	98.7172341136155	-7.21872141292386e-11	-92553.8083155168	0.0164971932299687	48.6263688255203	495.162949840975	97.5620105541151	-0.03895121082621	-0.000743726577075834	0.4	6.71561604584366	-0.0343867188059317	99.2668938474771	0.0917992215643644	0.0942234582314058	0.254794240999656	10102974.65	-3.33838956965585	0.227202705369784	0.000900454072019663	0.0198451817784901	-72.8987289872971	0.288888888888879	0.360690166021946	0.392827008615196	0.296416480835445	1.3815848015208	-155657635.80025	0.0613329010855517	-0.290692327997462	-0.012417150468676	1.12227911324786	1.12311378205128	1.12205806037957	1.12345159798058	1
2006-01-24	0.03895121082621	28.9530789146956	441976903	0.533333333333381	55.6950824417772	0.115406645650619	0.588407898903269	0.072044590060319	2404574.53706299	100.529525285655	1.20170783995431e-11	43966.09157983	0.0102371772043279	46.1728361027809	512.897777640457	100.740422545522	-0.0417334401709402	0.00566817915373329	0.5	28.2266158169453	-0.0360898837357617	99.2443197010374	0.0900881840300465	0.0933964033911339	0.23056798010308	10156218.8	-3.29701505995191	-0.612164151781212	-0.000195738955160214	0.0181478941176584	-30.2521008403482	0.466666666666619	0.396015666236837	0.393889894489077	0.400267209732358	1.36876010986273	-148571986.646404	-0.0602049724809793	0.989672647165941	0.0197940992058324	1.12895646367521	1.12255733618234	1.12658331162057	1.1256665463664	1
2006-01-25	0.0393486721611714	29.1380863922158	453536755	0.333333333333333	59.8932305239803	0.136402582920114	0.87016261681623	0.0737317902318533	5210576.10241404	102.594534202267	7.83464714618254e-11	237922.70410436	0.00567146751041281	44.7429101093106	531.312524356063	101.70659261212	-0.01112891737892	0.00857477347506284	0.6	7.58237492114153	-0.00954264791220547	99.0523902540534	0.0908629588285244	0.092889714478612	0.219569355054094	9940571.25	-0.335369015006442	-0.285893036702301	0.0006826510251091	0.0189464572332853	73.8589211618369	0.666666666666668	0.486232666380114	0.424670818452756	0.609356362234831	1.51997903759209	-138790573.415635	-0.0743541196630257	2.33029304823477	0.0218098443378646	1.13563381410256	1.12589601139601	1.13794683381542	1.13203151579162	1
2006-02-06	0.0387524801587293	29.9510888986829	464239882	0.166666666666624	62.0449589836735	0.13256534041286	0.962298228651034	0.080146378442706	6067947.38500136	103.569465558127	1.08484185883322e-10	219176.102597542	0.0040663351961463	38.9353387795476	555.202225839893	104.712604914491	0.0333867521367599	0.0114473869522305	0.6	17.7315899839405	0.0288360880889323	98.8252100953875	0.0905080473560695	0.0924133810541035	0.22097859563075	10196059.5	1.16033398682657	-0.801935628387952	-1.3391105532144e-05	0.0182810664127916	177.777777777781	0.833333333333378	0.601932888697869	0.483758175201127	0.838282315691353	1.71745437292152	-138077031.615632	0.0177232087580879	2.84201142224911	0.0119141490121932	1.14231116452992	1.12923468660969	1.15015956418654	1.13976851745292	0
2006-02-07	0.0407397868335364	29.3661347431953	452145390	0.404761904761923	55.6180756037211	0.124734514563389	0.638046299952067	0.0784635622611801	5867058.60196818	100.955240730853	-1.21605109505033e-10	-93801.8677105808	0.00344211707393116	38.6868078879455	568.924829507909	105.368454299912	0.0194756054130998	0.0126221542964751	0.6	-8.50944178061513	0.0171289838066204	98.8852085993375	0.088682313272795	0.0916671674978418	0.219780784292212	10557246.75	3.44444808014161	0.0928477034428852	-0.00136772863285439	0.0193293559730256	76.6823161189393	0.595238095238078	0.599701290877938	0.522405880426731	0.754292111780354	1.65573493271551	-138077031.615635	0.0531108962536406	0.324537779663602	-0.0239719582805938	1.14620628561254	1.13173869301995	1.14902728661819	1.14104019273084	1
2006-02-08	0.0385537494912486	28.6194509469459	452145390	0.404761904761923	55.6180756037211	0.143047670884772	0.630482660196657	0.077632599510161	6865799.93088457	100.856428250614	-7.23136795350266e-11	-168248.25276001	0.00133761026189272	43.2140548087572	589.680452180233	104.038629001766	0.00556445868945987	0.0132730320022345	0.7	8.22274339320317	0.0048641298083385	98.9489160442852	0.0869970202728492	0.0907331380528433	0.216266738450455	10541942.35	1.4617453432732	-1.02945062369045	0.00049780484302223	0.0179694400159098	28.4820031298862	0.595238095238078	0.598213558997985	0.547675106617149	0.699290463759657	1.588272133661	-131600823.923327	0.0872137304579135	0.0404523496951642	0	1.15288363603989	1.13758137464388	1.14827243490595	1.14208065432187	0
2006-02-09	0.0379575574888064	27.9261017075715	444867393	0.666666666666667	49.1262138351355	0.135632686150076	0.269288799870681	0.0755506913743483	5222146.37273902	98.1047825291998	-1.16994828925340e-11	-111369.812533375	-0.000517209301260202	44.1674400210423	591.756101865351	99.0127699393025	-0.00556445868946009	0.00871725479466362	0.6	-113.367507886144	-0.00497298155289322	99.2424085094191	0.0815890476417362	0.0889043199706219	0.200777421661225	10623895.75	-0.477002820479599	-0.292337954283754	-0.000537752853076961	0.0191366992610046	-24.4150110375261	0.333333333333334	0.509920150443101	0.5350901212258	0.459580208877704	1.30252671586746	-137555548.741509	0.0438292244186549	-2.66877549748082	-0.0270503386926408	1.14898851495727	1.13897248931624	1.13756769283379	1.1373674823887	1
2006-02-10	0.0379575574888071	26.9500470610027	450816289	0.619047619047606	50.2629388565691	0.111890072685337	0.343327380851414	0.0766415007336182	4525882.12105784	98.6783301517968	-4.68437848905478e-11	-94818.6195134282	0.00140894947585957	44.492738617717	591.404995893766	98.2934073878808	0.0333867521367499	0.00243798944588472	0.6	-12.6256694541083	0.0302157531144713	99.4322335033333	0.0748849317701057	0.0861004423305187	0.180169250933737	10149087.15	-3.25631571432912	-0.121961215551657	-0.001063110596657	0.0188548443305442	-44.0476190476084	0.380952380952395	0.466930893946199	0.512370378799266	0.376051924240065	1.10289212995036	-135572583.408175	-0.046015411025835	-1.98537766272013	0.00497298155289322	1.14119827279202	1.1384160434473	1.13228601768216	1.13452297056874	1
2006-02-13	0.0365664428164421	26.210994375905	450816289	0.619047619047606	50.2629388565691	0.0814268039987689	0.358248582675089	0.07672924701917	3829602.91618346	98.8113445705535	2.13500716835865e-11	16551.1930199483	0.00324593423552133	50.3314331502234	601.912620558197	99.5063849696512	0.01947560541311	-0.00516765283200507	0.6	11.963586182336	0.0175147197587742	99.5831357068418	0.0693385700450768	0.0827480678734303	0.157153389619435	9651732	-6.01821600463691	-0.385525418494872	0.000155884126285247	0.0182836703877496	-27.9529213955453	0.380952380952395	0.438271389614931	0.487670715737821	0.339472737369151	0.933915797090412	-135572583.408174	-0.0659504014312882	-1.42621712946008	0	1.13062580128205	1.13646848290599	1.12876490091442	1.13219564271605	1
2006-02-14	0.0365664428164421	25.7764696006773	456233927	0.571428571428545	51.5192580194434	0.119758912350962	0.446436334616236	0.0673364588360159	3300494.75497866	99.5210305041969	2.7861884177229e-11	15073.1114227257	0.00292490777266785	57.2117670261496	611.976482652635	101.249456336559	0	-0.00864252911337207	0.7	2.55765523262162	0	99.6601050421204	0.0652889397391772	0.0792562422465797	0.135405658249832	8729293.95	-8.28555580003704	-0.589699629113387	0.00263620250233304	0.0161425692590674	-19.5004803073911	0.428571428571455	0.435038069267106	0.470126500247583	0.364861207306152	0.830154844747022	-135155842.023556	-0.0795316634764517	-0.246199875379113	0.00494837333312721	1.12673068019943	1.13646848290599	1.12827230929907	1.13130318514374	1
2006-02-15	0.0381562881562871	26.430557996266	471422753	0.41666666666665	56.8065680160874	0.0819791834209383	0.802823237981805	0.063107922021264	1141320.72395742	101.819191769087	1.12629957575044e-10	205237.69976404	0.00224718523997769	60.920716990029	597.912103878236	101.469961167154	0.01112891737892	-0.0111008586321738	0.8	2.26912361814999	0.00970471433897377	99.5331539984453	0.0624068900244166	0.0758863718021471	0.123451946394715	8937630.2	-0.507791744934247	1.02405215489044	0.00330981981078154	0.0167825936314416	121.13475177304	0.583333333333352	0.484469823955854	0.47490760815034	0.503594255566883	0.915864999678662	-141410064.494143	0.0160975313146661	1.88598461398668	0.0219695683372557	1.12784357193732	1.14036360398861	1.13629060292303	1.13512573151232	0
2006-02-16	0.0381562881562871	25.9058760579415	461992686	0.909090909090889	47.5071113834606	0.000733527350815502	0.228173203420308	0.0632522756892063	-2196320.05236411	98.2645045179599	-1.28054744442523e-10	-6609.98013491238	0.00139111467236841	54.0738257372139	562.512214615436	95.6852541316279	-0.0166933760683801	-0.00987717612956839	0.7	-16.6267624368078	-0.0149191906353768	99.7638015742113	0.0582484129482455	0.0723587800313667	0.104186068149992	8337796.4	0.055460638602346	0.340065232987916	-0.000899747796345892	0.0188090139091392	-61.7745803357305	0.0909090909091114	0.353282912940273	0.434366043080318	0.191116652660185	0.678377508412553	-150840131.494143	0.0131837339952956	-1.27780025094084	-0.0368887589726325	1.12673068019943	1.13785959757835	1.12772498528202	1.13066537123736	1
2006-02-17	0.0387524801587292	25.0090232385208	470599520	0.676470588235226	51.4974950521716	0.0603115867587229	0.509080531145264	0.063299884995719	-2331101.21508664	99.9753860724083	-4.04720255671679e-11	-112962.917056157	0.00171214113522189	54.2894669156636	540.235636723801	96.2100938994715	0.0166933760683801	-0.00567097429271482	0.7	-103.509463723083	0.0148821849250245	99.7908405746829	0.052911695230772	0.0684693630712478	0.0876752744846332	8280674	-0.241767080491171	0.0782402337899235	-0.000528616766992356	0.0191387291476701	-51.3494809688565	0.323529411764775	0.343365079215107	0.404032388458581	0.22203046072816	0.621964594270397	-146823608.960806	0.0386655121443775	0.246807515174686	0.0173842250917254	1.12840001780627	1.13479914529915	1.12850644199238	1.13055700472386	1
2006-02-20	0.0397461334961328	24.886625956735	481763574	0.529411764705889	54.1769987490885	0.025781285325072	0.694971806063792	0.0639896353540522	-1873213.36703743	101.193628588776	1.04005231343498e-10	161464.04803239	0.00230068965045316	61.0230389660982	527.693179018864	99.7573840456835	0.00834668803419003	0.000982380881012352	0.7	4.89877259689264	0.0073229276322283	99.7085900581565	0.0481995119026979	0.0644153928375378	0.0780655535093766	8502850.25	1.7851543618587	0.58346841631246	0.00122137901860696	0.019110510384216	34.2222222222259	0.470588235294112	0.385772797908109	0.39794585827509	0.361426677174146	0.668774894132484	-145707203.560808	0.0986272349508592	1.1479906346004	0.0122348419130361	1.13285158475784	1.13173869301995	1.1336644620405	1.13299764061711	1
2006-02-21	0.049086474867725	26.7589937698915	526639190	0.0704225352112825	71.2698069522973	0.225659423941875	1.74005610758026	0.10504519050022	9611622.76629175	112.694757371639	2.7012649806011e-10	3199008.78906252	0.00747278266309115	74.8829361817115	506.60428895107	111.888181761507	0.12241809116809	0.0160143776413192	0.8	1.50168188370977	0.100272000198792	98.6225480374857	0.052624527533238	0.0620572197766778	0.117923293058952	10346797.4	25.528196052097	1.84699771450307	0.0107887633906859	0.0369761647452524	294.801762114533	0.929577464788718	0.567041020201645	0.454310912250609	0.792501236103719	1.66733086261905	-108568762.733224	0.547224042752957	10.8127837899206	0.114758916904429	1.1640125534188	1.14537161680912	1.18347363115141	1.16028751857277	1
2006-02-22	0.0502788588726092	28.5270131369541	526639190	0.0833333333333503	71.2698069522973	0.290885247882845	1.33480358920844	0.1453399251654	17045814.9088895	111.739078504095	8.23390423497978e-11	3121356.3924502	0.012448692837318	78.9869947906086	499.138964963572	114.956102045763	0.10850694444444	0.0261820464620597	0.8	1.57259820080631	0.0883578511865991	97.8782040817766	0.0571371926298481	0.0610732143473119	0.184605629214962	11689146.35	33.3001085728991	1.47539795997296	0.00936081329176178	0.0369794558345565	247.841105354064	0.916666666666651	0.683582902356647	0.530734908952622	0.989278889164698	2.41308878070254	-95078141.6805965	0.533071817860441	8.38214993002126	0	1.19016550925926	1.15900454059829	1.21667974389201	1.18261560053649	1
2006-02-23	0.0532598188848193	30.722485836909	573125233	0.0537634408601886	75.864070998167	0.348562401689298	1.33739193929067	0.194810848822723	26964252.7754431	115.848504676081	7.69316858938187e-11	1422683.16250456	0.0222756695613304	82.66210740683	488.00830124897	119.842547008383	0.19753828347579	0.0445370126508139	0.9	1.46563853560296	0.158931229822955	96.9718436749779	0.068365311824879	0.0625316338428253	0.282066772352096	13740705.25	40.2894891931775	1.39161405660738	0.0111933072002704	0.0382697453229325	215.138836059338	0.946236559139812	0.771134121284369	0.610867979729871	1.09166640439337	3.36492351183397	-65194256.8948745	0.680769718169904	10.5642761744233	0.0466014203557625	1.23690696225071	1.18181882122507	1.25922016758043	1.21201294861299	1
2006-02-24	0.0530610882173385	32.7611390582956	599673281	0.0322580645161366	76.2361087084384	0.388658267089049	1.17105866209158	0.233878933644269	34331775.9192244	115.222975698564	2.04103898285496e-11	1496545.92069532	0.0311752365037656	83.9910007983133	487.192804988295	120.338610683592	0.20310274216524	0.0595168214173515	0.9	1.4866150585997	0.163061981671613	96.3509519797	0.0802278530366838	0.066070877681597	0.392139230696831	14732527.45	37.5143827522908	0.908420281563998	0.0106328707698088	0.0383146775579055	160.064412238323	0.967741935483864	0.836670059350867	0.686135339603536	1.13773949884553	4.08536085089042	-42438787.18059	0.664827835802098	7.49618464142317	0.00413075184865719	1.28086618589744	1.20463310185185	1.28943526960253	1.23707704407367	0
2006-02-27	0.055048394892145	33.7312100444289	576838941	0.288659793814423	64.9204809102225	0.288901751698252	0.885371000420466	0.255116055973097	28601636.8815453	109.533382280172	-2.03398919171779e-11	-593206.135372196	0.0394684201274784	79.6926995102179	457.552286366408	114.561643395285	0.17528044871795	0.0677319698090871	0.8	1.78076002118197	0.14586421728744	96.3472012607284	0.0856134323888917	0.069979388623056	0.481926075805794	15476289.3	33.7165824360727	0.635515400866336	0.00923311911483866	0.0399864198563118	107.210286458335	0.711340206185577	0.794893441629104	0.722388040278726	0.939904244329862	4.20760746522968	-62228548.5139226	0.861648308405889	0.686901510667634	-0.0442481030768133	1.31035781695157	1.2216047008547	1.29010306553749	1.24696097377071	1
2006-02-28	0.0576318935693935	33.2801454523281	595064545	0.268041237113387	65.4465046011956	0.319463574907858	0.865706598502847	0.26262697162499	26792575.1523341	109.219255612327	-2.09812265348052e-10	-616361.083288733	0.0480826302140442	76.1570589742473	444.673692500034	112.555108233146	0.17528044871795	0.0567827831075995	0.8	1.75364758698084	0.145190708350247	96.3740866960743	0.0925108951834348	0.0744856899351317	0.553206138758044	16076114.85	28.8647766564977	0.867638227591696	0.00954088544402641	0.0399264247370756	66.040797403802	0.731958762886613	0.773915215381607	0.73956376531302	0.842618115518783	4.28588101124705	-51012792.2062272	0.887903666036036	-0.850748784841169	0.00429947261570007	1.3131400462963	1.23857629985755	1.29240308239062	1.25605954510274	0
2006-03-01	0.0582280855718357	32.8612997596631	580812146	0.329896907216494	62.4223916000133	0.298127501145897	0.779120602350062	0.265807664789348	21909621.5458048	107.061028842202	4.48076152267742e-11	-68252.5179175721	0.0551987168072943	79.2690327819551	438.285479893633	115.281554576414	0.15858707264957	0.0466324930192	0.7	1.61356699913601	0.132236433532188	96.5643155976556	0.100161889768272	0.0796209299017598	0.600976285343435	16434868.25	23.3203874092527	0.672069556433707	0.0105278158460743	0.0391247332239185	59.903381642511	0.670103092783506	0.739311174515574	0.739479568380538	0.738974386785646	4.18704492502522	-57663911.7395587	0.653888023595944	-2.09216572417177	-0.0129542748180588	1.31258360042735	1.25137455484331	1.28837196826991	1.26046867145288	0
2006-03-02	0.06260016025641	30.7741839472335	559925410	0.556701030927848	52.7902775179609	0.236808867707877	0.569864156823877	0.261107663232544	15038667.7883843	101.588133105901	-2.067994956552e-10	-758188.91615481	0.0578204329205965	75.0627973886338	418.191471218017	107.878396012144	0.0918135683760599	0.01966402402928	0.7	2.56514961818149	0.0782994783695585	97.1587208864132	0.101445869976761	0.08398591791676	0.609750955819854	17060507.6	21.1600368286045	1.25590866022928	0.00675686117310787	0.0421288762746711	10.5398885284082	0.443298969072153	0.640640439367767	0.706533192042948	0.508854934017405	3.66849848532076	-67770396.9008514	0.784435121304158	-6.00634036152979	-0.0489885818295024	1.28754353632479	1.26222524928775	1.26528154366142	1.25294722108771	0
2006-03-03	0.0641900055962557	28.5913373938218	544436077	0.577319587628846	52.0046523114125	0.215745290877062	0.542961060420622	0.258098131613846	11773586.0325665	100.902205445376	-1.03448329648637e-10	-682323.464765826	0.0586408338812219	70.8786071430893	403.192421445084	106.08015027252	0.0612090455840499	-0.00816823837113111	0.6	2.70534379180977	0.0517550650767378	97.6884334132623	0.10027688841598	0.087244112016604	0.590644096151527	17256981.65	17.1806682091407	1.04665143177796	0.00643083286652747	0.042202785530973	-16.9837331127647	0.422680412371154	0.567987097035562	0.660351160373819	0.383258970359049	3.18495637366802	-64328322.9008476	0.666820815973863	-4.83628574930022	-0.00457484495556504	1.26027768874644	1.27057193732194	1.24803310769261	1.24578158739085	1
2006-03-06	0.0643887362637364	26.7018341306881	553506041	0.556701030927848	52.7617294580007	0.210921790125016	0.553376118461987	0.257173423655646	9039494.4907302	101.17762771137	5.97418037014511e-11	-17860.1568064177	0.0641517881602049	71.2621387523457	386.639281049781	95.0127289036	0.10850694444444	-0.0259059229801561	0.6	2.70534379180993	0.0932186690049353	98.0865601732932	0.0985557755880138	0.089506444730886	0.555741316808978	17175323.5	11.1517241020224	0.515308367882074	0.00640402492244882	0.0422039104502694	-14.3167028199562	0.443298969072153	0.526424387714426	0.615708902820688	0.347855357501901	2.8059996360501	-65624032.0437074	0.428053015623591	-2.73765399732907	0.00457484495556504	1.24581009615385	1.27808395655271	1.23838896994322	1.24093051594605	0
2006-03-07	0.0651836589336593	25.6487525247436	541995608	0.8041237113402	43.8275594669006	0.180400578170225	0.331484633071789	0.254386097224567	4153341.81475528	95.6137723190656	-2.26969744991546e-10	-359061.253561268	0.0655785724395528	67.3294723397675	361.427324005573	89.8086199334443	0.0222578347578299	-0.0395542444255884	0.5	25.040064102563	0.0195045338809071	98.8723413378411	0.0929007208583634	0.0901852999563815	0.491014644763887	17146120.55	7.14590673399693	-0.277306184444029	0.000905065503072059	0.0449140683649344	-68.2855040470938	0.1958762886598	0.416241688029551	0.549219831223642	0.150285401641367	2.04344783830055	-76213630.4037071	-0.0373193707361081	-6.33234811645923	-0.0563299100323028	1.21687491096866	1.26500747863248	1.20970171001913	1.22482082035057	1
2006-03-08	0.0651836589336593	24.8617030034993	550749154	0.742268041237093	46.2767477690577	0.172873064003404	0.38028317126474	0.250995214032987	2825410.11798362	96.909409116664	-1.19381107622088e-10	-311232.855902735	0.0660601121338338	67.4035547938249	337.643489735005	86.9612202350735	0.0250400641025701	-0.0493741997187514	0.5	3.90335298020968	0.0216524261286637	99.3689508809366	0.0900348643996116	0.0901552128450275	0.416209429111269	17201112.85	2.45214626228276	-0.0744443261863363	0.00452673133955657	0.043718824418685	-87.9876400154493	0.257731958762907	0.363405111607336	0.48728159135154	0.115652152118928	1.52971104895154	-72128642.2703707	-0.064592189389753	-3.29875485414033	0.0143827341607927	1.19461707621083	1.25360033831909	1.19614132875919	1.21467531960307	0
2006-03-09	0.0659785816035821	24.504934931377	541067198	0.934782608695637	41.7072174019208	0.175623881729922	0.246931522760234	0.248578918006931	798200.601204999	93.6264482968453	-9.11438984478402e-11	-115498.837028112	0.0526661747114507	64.5769745552105	301.128027038063	83.7171834879352	-0.15302261396011	-0.0470478037461058	0.4	24.76184116809	-0.126993758817465	100.03252022971	0.0826810703158376	0.0886603843391895	0.3268496602024	17321310.8	-1.00771547041076	0.117707408137395	0.000894178775875673	0.0446574306087781	-119.418238993706	0.0652173913043634	0.264009204839679	0.412857462514253	-0.0336873105094705	0.850752531751953	-76714831.9545802	-0.121339236717713	-4.54359528916986	-0.0338872680416999	1.17681080840456	1.23217717236467	1.17411733764383	1.19929241702308	0
2006-03-10	0.0645874669312171	24.3120197723978	530511492	0.978723404255315	39.8893043876773	0.146852151147902	0.190121775492688	0.248022274229122	-1925254.13630516	92.2753044240268	-5.71996235856339e-11	-276667.139645672	0.0393792461100191	61.320022674644	295.585770038657	86.2120684523921	-0.16971599002849	-0.0447358369034143	0.3	-11.3425225770225	-0.141875943742489	100.658250440969	0.0726826880715119	0.085464845085654	0.228335310199057	17551651.3	-3.3828179268652	-0.0560325858440365	-0.0010402488163919	0.0447114159929049	-134.177215189873	0.0212765957446853	0.183098335141348	0.336271086723285	-0.123247168022527	0.193362080957793	-84022628.4161179	-0.115401844987365	-4.53272336172868	-0.0148821849250245	1.15677875712251	1.20852822293448	1.1538702182108	1.18367124653611	1
2006-03-13	0.0554458562271057	24.1328842676314	539195998	0.882978723404267	43.8433273983553	0.161848762495469	0.270755975804135	0.246278091199637	-1446795.93381222	94.2853725667943	5.34800721653586e-12	20625.1085069065	0.0230782357184629	55.9185755961012	292.165622186609	87.7728071211715	-0.20588497150998	-0.0461004790234921	0.4	-0.888324034164419	-0.166236325812599	100.933066997223	0.0643094827212809	0.0812337726127794	0.137485953285488	17713952.45	-6.38603388119531	-1.64235405533598	-0.00811973391584405	0.0288218489468439	-102.295306611854	0.117021276595733	0.161072648959476	0.277871607468682	-0.0725252680589352	-0.159277235376154	-78232957.749452	-0.230518555689756	-1.32634294972827	0.0222410382856525	1.14064182692308	1.19322596153846	1.14871882662296	1.17544302779269	0
2006-03-14	0.0536572802197793	23.9665441560626	531762395	0.957446808510629	41.5538372101197	0.151417900768339	0.206644116117039	0.246993388118647	-1815488.92095378	92.7044155007287	-1.0413254685075e-11	36343.3340567162	0.00597465916977491	47.1823323425729	292.74185417722	87.3960732353165	-0.23092503561253	-0.0365577741593596	0.3	-0.776092593982942	-0.187622738272801	101.271499622455	0.0572224230160063	0.0764315026934248	0.0505816926138269	17814750.7	-9.61857691549221	-1.5945128701051	-0.00934170779821468	0.0288137705998227	-95.060516846581	0.0425531914893714	0.121566163136108	0.225769792691157	-0.0868410959739907	-0.567821361361165	-81206398.9494504	-0.307892234110666	-1.59050960828305	-0.017255660611545	1.13396447649573	1.1754196937322	1.13879269709337	1.16516982965478	1
2006-03-15	0.0496826668701657	23.7253944162517	537752619	0.872340425531924	45.0833590655006	0.190707501593801	0.28836558885729	0.25054323129659	-486151.180361703	94.5920895973922	2.06758214762534e-11	-5722.25143562412	-0.00633135523960493	34.8043691985836	311.797970304519	93.6098451910142	-0.15024038461539	-0.0293411278623043	0.4	-0.417832756243737	-0.123678008403138	101.333517672463	0.0523926628848168	0.0716237347317032	-0.0218875423301679	17354820.6	-13.241104076519	-2.0490233099139	-0.0113283111560446	0.0253257756624861	-73.6481861738534	0.127659574468076	0.123597300246764	0.191712295209693	-0.0126326896790938	-0.731915523263094	-75216174.9494504	-0.327605460498666	0.531036144391642	0.0196966267928504	1.12840001780627	1.16150854700855	1.13959455565959	1.16081136477064	1
2006-03-16	0.049285205535205	22.7428678780153	545404530	0.861702127659581	45.5261944187067	0.211611515681616	0.290154803499323	0.246372385374478	-522648.006123453	94.6916804570896	8.49757937122745e-11	77309.393640925	-0.0189762309153307	26.4010850154098	327.288448230444	94.2683430812458	-0.15302261396012	-0.0201685278249754	0.5	-0.397694734067157	-0.125542458647735	101.335571248864	0.0505026344665453	0.0673995146786716	-0.0801860162728762	17265912.8	-15.0777362123749	-1.24400080276364	-0.0114498329930143	0.0252498153976449	-51.0271703114645	0.138297872340419	0.128497490944649	0.170640693788011	0.0442110852579236	-0.833869599583514	-77766811.9494504	-0.395718114202935	1.1479906346005	0.00243502237110277	1.131182247151	1.15399652777778	1.14105653781864	1.15775120792811	0
2006-03-17	0.0455093228530721	22.152405607846	539456774	0.945205479452041	42.2259582001612	0.184174378108606	0.203769967323671	0.245318933517296	-1916459.73046209	92.661696938968	-7.87386718055748e-11	-63821.4100894611	-0.03253068156914	29.7426001753015	336.76038536131	91.7840866741615	-0.1613693019943	-0.0108115001966924	0.5	-0.47940477103621	-0.134719832993629	101.507802563461	0.0464037987887549	0.0632003715006883	-0.133622861386928	17132958.9	-17.7697642819308	-1.34525153765534	-0.00992162618466965	0.0237795707559717	-66.7440810270278	0.0547945205479586	0.103929834145752	0.148403740573925	0.0149820212894063	-1.07707393220573	-83714567.9494504	-0.394728678418711	-0.90347432728055	-0.0221316491639531	1.13229513888889	1.1445369480057	1.13368450455716	1.15069470431104	1
2006-03-20	0.043323285510785	21.9165698521061	546198605	0.82432432432433	45.9749219522628	0.197898674352001	0.28238076188126	0.247166369922184	-1043414.72516976	94.5158010923269	-5.16678637747475e-11	563.184428415683	-0.0397716117868328	37.0451043878369	361.137969850666	99.034222443604	-0.07790242165242	-0.00343833308354814	0.5	-0.648783645156412	-0.0660346243712766	101.437812415286	0.04433239929832	0.0594267770602146	-0.173546947235981	16911847.75	-19.3266255710064	-0.994495868883078	-0.00880854356979912	0.0248380615700294	-58.8704726826292	0.17567567567567	0.127845114655725	0.141550865267858	0.100433613431458	-1.10316612349133	-78770558.5494508	-0.338297915935828	0.654384874684089	0.0196966267928504	1.13285158475783	1.13674670584046	1.13618909396878	1.14896808039849	1
2006-03-21	0.0441182081807071	20.7063565119398	562466326	0.687499999999985	49.0880092910785	0.110064550770205	0.362241645609453	0.249246829555513	554041.19896204	96.6186017738613	9.0409223521092e-11	233441.13776489	-0.0456749317426368	37.2187204333887	381.027280381023	99.2860101631025	-0.0528623575498599	0.00316938627964917	0.6	-1.04045702963211	-0.0445378403389725	101.21042709847	0.0434904264397376	0.0562395069361192	-0.196226147312573	15481453	-13.1446729225659	0.132257594241889	-0.00667021103641783	0.0257339243881839	-4.26515390271673	0.312500000000015	0.189396743103822	0.157499491213179	0.253191246885106	-0.976803308046992	-74489579.3389229	-0.317754556202285	2.03828362352042	0.0169219390767391	1.14119827279202	1.13758137464388	1.14435068871423	1.15109640727242	1
2006-03-22	0.0399448641636129	19.5825869817854	562466326	0.591836734693861	49.0880092910785	0.0682326298087015	0.378728858847233	0.245166563818597	815079.179157451	97.1134196635642	3.7072518533789e-11	158411.857583282	-0.0518279389473262	47.0502763582192	403.815589224813	102.708198629175	-0.05842681623931	0.00728908932567021	0.6	-2.3555420734286	-0.0491126852945375	101.021565664932	0.0407870619470032	0.053149017938296	-0.206304239857424	14015985.75	-14.8018798484205	-1.05013715186616	-0.00325535403120775	0.0228674608480823	26.6824395373295	0.40816326530614	0.262318917171261	0.192439299865873	0.402078151782037	-0.866644752785284	-75951190.3389208	-0.319824863215918	1.41812690194347	0	1.14509339387464	1.13674670584046	1.14979175187786	1.15283776562382	1
2006-03-23	0.0381562881562864	18.2935593471916	571702460	0.489795918367308	51.4075705472012	-0.0400325177901001	0.447862338387646	0.225238118977628	1081111.71445965	98.9801278449842	2.64001371125858e-11	64242.6076166463	-0.0508291899517821	57.1699236593711	430.889503454257	105.497607880859	0.0222578347578399	0.00870040065925092	0.7	-4.42062857494289	0.0191313737499585	100.758347054724	0.0425720014071398	0.0510336146320648	-0.203074195351516	12153490.3	-14.5659304833239	-0.517028193630715	-0.00207322535391842	0.0232196420636988	73.8609112709917	0.510204081632693	0.344947305325072	0.243275301685606	0.548291312604003	-0.674645483312597	-74924953.2278057	-0.355058870053483	2.13705861046347	0.0119141490121932	1.15121429843305	1.14119827279202	1.15805617622817	1.15679181277018	0
2006-03-24	0.0375600961538443	17.4124438625796	564536315	0.60975609756096	47.2358545703989	-0.177266229042416	0.369481086277853	0.195169087317357	-626929.168429084	97.6946215174786	-3.56462790217394e-11	-25477.757467509	-0.0539502805628571	50.440303018744	444.13800017519	100.977579105897	-0.01947560541311	0.0108179825679893	0.7	-2.05552150449235	-0.016800097521645	100.741206840872	0.0407953555614444	0.0489859628179407	-0.198901129049656	11184395.15	-15.8839942803595	-0.235600441871712	-0.00392347873609509	0.0236758211150457	56.3685636856355	0.390243902439041	0.360046171029728	0.282198924800313	0.515740663488557	-0.688857999293024	-82091098.2278057	-0.329932655987107	-0.120868109183447	-0.0215487371108107	1.15733520299145	1.14481517094017	1.15521910442752	1.15547420332582	1
2006-03-27	0.0359702508139993	17.4453623088902	573413218	0.310344827586159	49.2086391595451	-0.0573592786624285	0.446194965856356	0.166308077567597	788547.903330781	99.1915811220003	-1.33418425252685e-10	-40325.2050503113	-0.0525770006939843	51.6594836222338	465.600609593835	103.729728478154	0.03060452279202	0.0122192551847406	0.7	7.27907992429685	0.0267217586186724	100.631137977575	0.0389413571389012	0.0469770416821328	-0.190279924476966	10486523.3	-15.4510548046106	-0.25980110657607	0.00068037166843394	0.0187898896931093	12.5960061444039	0.689655172413843	0.469915838157766	0.344771229252798	0.720205055967704	-0.615576300812992	-74258536.7572176	-0.237737936589629	0.240284084220641	0.00963458809861753	1.16123032407408	1.14704095441596	1.15703736235339	1.15641959875842	1
2006-03-28	0.034777866809115	17.0229994997013	582608381	0.172413793103366	51.1745842835388	-0.0903702959782685	0.538545296637222	0.142453456008021	2457456.94975496	100.681290022323	6.81885476375269e-11	100561.264690195	-0.0487781875502193	59.2114150309311	486.552698875995	102.681788390474	0.05842681623932	0.00956539512466398	0.8	10.012537438183	0.0511465914559024	100.454757112522	0.0273851624521266	0.0430586658361316	-0.175369276165649	10035001.25	-14.6975069725258	0.049218709506837	0.000330490297433888	0.0185571953715678	103.303303303305	0.827586206896636	0.589139294404056	0.426227250969884	0.914963381272401	-0.474581334940516	-69150112.8683231	-0.222349654711751	0.757562380015188	0.00954264791220547	1.16345610754986	1.15232719017094	1.16195917343027	1.15921654363581	1
2006-03-29	0.0347778668091143	16.2943142467972	601648138	0.18604651162787	56.1958600900279	-0.0412673692365364	0.822945660341765	0.110313352785781	3721165.46487167	103.65774055806	9.26956383362113e-11	342517.443186862	-0.0403423254985715	69.7642023003471	501.386506855435	105.107326228916	0.0639912749287799	0.0113967135980801	0.8	1.926050474687	0.0546877852386852	100.088263785988	0.0190720998791054	0.0382613526447264	-0.147460766400909	10274369.15	-6.33249449976312	0.676265319685154	0.00457598989630086	0.0170002453376729	188.037775445965	0.813953488372132	0.664077359060082	0.505510620333283	0.981210836513678	-0.149105568513297	-66143835.4472693	-0.0650413385460564	2.77442613008946	0.0257822320684353	1.17180279558405	1.15844809472935	1.17544188841221	1.1670694117704	0
2006-03-30	0.0367651734839214	15.230533697137	588728961	0.48837209302321	49.6917515152424	-0.0230466759250645	0.572267145722253	0.0958422998498037	2199589.4735098	100.769278760391	-8.2685639919702e-11	57714.6016960313	-0.0319064634469244	68.2378588293402	502.565338534283	104.227025608574	0.0472978988604	0.00808418877999738	0.7	2.52276686447504	0.0414012725486504	100.086034253472	0.00390788619127558	0.0313906593540362	-0.124049621016376	9875991.2	-4.44866763861237	0.202046229840807	0.0034825269690674	0.0187433992798678	87.6678876678959	0.511627906976791	0.613260875032318	0.541427371899628	0.756927881297698	-0.140254480085666	-72322572.2733552	0.0850970464009047	-0.396032657625809	-0.0305421733015797	1.17013345797721	1.16067387820513	1.17237403790633	1.16691830724753	1
2006-03-31	0.0385537494912479	14.5896584972261	588728961	0.48837209302321	49.6917515152424	-0.0389857955718933	0.601706430715051	0.0871628229186062	1511256.48686928	100.975611993454	-9.41008497339086e-11	-233636.73683448	-0.0229712268975042	60.942674009043	493.75320583198	102.194190501297	0.0250400641025701	0.00687571938992304	0.8	3.53090720775799	0.0217046457558001	100.082894371411	-0.010517884804371	0.0230089505223548	-0.104408813789869	9619766.85	-4.73888786340217	0.176879369685452	0.00187608310777773	0.01793535780485	39.7932816537476	0.511627906976791	0.579383219013809	0.554079320937689	0.629991015166051	-0.131722197190376	-71829008.1781151	0.205631230271774	-0.277552620043214	0	1.17347213319089	1.16540366809117	1.17032880423575	1.16679467627427	1
2006-04-03	0.0403423254985743	13.9945600973087	601326837	0.395348837209316	51.6871609648307	-0.00798094869061248	0.788474893188412	0.0717675938993121	2334139.77314729	102.123685120357	1.16746031161782e-11	70100.360576877	-0.013554450653805	67.6322922571278	487.595244701989	101.43824862279	0.0333867521367501	0.0066197914818631	0.8	2.11431619761385	0.0287669561035334	99.996553265644	-0.0184835400604892	0.014710452405786	-0.0844725111557976	9796162.45	-3.33063621449562	0.527517561152266	0.00377966952574621	0.0171631635376727	53.7794299876017	0.604651162790685	0.587805866939434	0.565321502938271	0.632774594941762	-0.0474867894173281	-67187685.4412745	0.217594950554476	0.276456459832304	0.00949733271883615	1.17681080840456	1.16902056623932	1.17267495424834	1.16871696318322	1
2006-04-04	0.0439194775132264	13.7210037504728	621451089	0.125000000000028	58.7372648189674	0.0971074869164436	1.20496625266188	0.0818190989187228	5487695.63695771	105.666178392064	1.25011356505021e-10	518022.636217906	-0.00230068965044494	70.7912813123727	482.272340445417	105.273578283565	0.10294248575498	0.00984588729598275	0.8	1.84081604602532	0.0880108490514572	99.6062776167087	-0.0228402056179671	0.00720032080103536	-0.0514812072304194	10226853.4	2.76871491488721	1.21179684782444	0.00505949929357613	0.0190241928490515	183.265856950067	0.874999999999973	0.683537244626281	0.604726750167607	0.841158233543628	0.321756392389849	-56351549.7489694	0.252708652346473	3.1714406982121	0.0371122437839706	1.18682683404558	1.17514147079772	1.18907761076195	1.17838350147521	1
2006-04-05	0.0445156695156679	13.6611870751253	640711259	0.117647058823555	59.9183058366658	0.0912797131542814	1.13175303006375	0.0980145822759853	7267636.58500597	106.107158951383	5.12431622436789e-11	528301.590878763	0.00768680030499413	73.0221901326423	474.234687284902	104.73738262566	0.08903133903134	0.00863328056672016	0.8	1.79220587011016	0.0751220013871294	99.2686930553263	-0.0249355842785179	0.000773139785124699	-0.00987360827007233	10752184.6	6.55225040625659	0.923083812350409	0.00537328609971758	0.0190138539039568	193.815413891535	0.882352941176447	0.749809143476336	0.653087547937184	0.943252334554641	0.661631493169557	-52499515.7489731	0.284919214075591	3.02907411587012	0.00680777912852254	1.19239129273504	1.18209704415955	1.20279494444908	1.18781006699305	0
2006-04-06	0.0463042455229943	13.8020506076062	622906731	0.314814814814811	55.3672386371636	0.0526609461258362	0.865211862369011	0.106806412749714	3973640.63435329	103.838573762206	4.34765815003746e-12	-117765.805844845	0.0144105212214232	67.7876023035135	463.296538491268	105.082603832853	0.0472978988604	0.0127440471119315	0.7	1.74185486191023	0.0399419699521046	99.1938694378149	-0.023873532978548	-0.00415619476760984	0.027409221014052	11158313.2	8.38470876644207	1.09643880140675	0.00564443737051654	0.0186181245402913	137.040254850861	0.68518518518519	0.728267824045954	0.678147639973441	0.828508192190982	0.76891919695079	-64962685.3489721	0.402384599237388	1.08651605757772	-0.0182580923582857	1.20073798076923	1.18543571937322	1.20452055532123	1.19147583246078	0
2006-04-07	0.0463042455229943	13.2463985561813	610943725	0.440000000000024	52.6743546314762	0.0742177376992957	0.727611791632158	0.10427546525427	1650729.33922598	102.28803474518	-1.01912179927962e-10	-281354.686943531	0.0181558299547124	62.1638126995874	442.090557744307	102.876497245581	0.0333867521367499	0.0136078255311044	0.7	2.38998966108175	0.0283590269307535	99.2521559969288	-0.0235352308581298	-0.00803200198571383	0.0552391940378705	11228678.2	6.38530618953592	0.573487504983156	0.0034010084984591	0.0186615247939409	49.8743532889803	0.559999999999977	0.672178549363962	0.676157943103614	0.664219761884657	0.750417754829269	-67355286.5489699	0.396274413060163	-0.463849809439243	-0.0115829430213511	1.20630243945869	1.18988728632479	1.20103391366145	1.19194579571189	1
2006-04-10	0.0480928215303207	13.9072055716904	630982671	0.017857142857147	63.1087370424941	0.124750984754279	1.2167868747505	0.115517038500441	5760535.30253023	108.117574753644	1.35587013631477e-10	669455.172720756	0.0238986366790892	63.2120965289052	420.150597665691	108.310103665266	0.0945957977207901	0.0195377261314574	0.7	1.73732410767283	0.0774567558754048	98.7767737639477	-0.0178725109301867	-0.0100001037746084	0.0986791773797568	11796400.2	9.24888946248289	0.208494842358807	0.00667569515620252	0.0243877741872889	155.672690763051	0.982142857142854	0.775499985290259	0.709271957165829	0.907956041539119	1.22878535431519	-48800706.9193406	0.440329347473199	4.30632975658073	0.0610118779568445	1.2246651531339	1.20073798076923	1.22374954999082	1.20598852788237	1
2006-04-11	0.0532598188848179	15.7257592273339	662195122	0.130952380952372	68.1503378793067	0.171515949910321	1.30423736351858	0.145204802839753	10429687.7719837	111.432961363443	2.09811043264915e-10	1534226.51241988	0.0341893182938893	67.8740177856071	401.098044752927	109.718306824384	0.16971599002849	0.0230335370446169	0.7	1.51829612847692	0.137705516254984	98.1123050601688	-0.00365664388295994	-0.00873141179627872	0.163895908617651	12985342.6	16.534150156464	1.45183992123445	0.00949416826170092	0.0257963448543054	226.702190645351	0.869047619047629	0.806682529876049	0.741742148069236	0.936563293489676	1.91361741311566	-36662531.5304512	0.77129184845794	6.35503497129404	0.0387000232687683	1.24414075854701	1.2154837962963	1.25558668361212	1.22658351387734	0
2006-04-12	0.0556445868945864	17.4144161932886	646173062	0.345238095238098	59.4071758842614	0.0948451427604657	0.927500107337321	0.158022895150846	7867858.58591589	106.62655597144	-2.53645290711966e-11	380368.364383027	0.0387371931843119	61.2729941468922	390.703708959516	108.826882335998	0.10850694444444	0.0237791491477292	0.6	2.31418430057384	0.089370904887598	98.0040097582614	0.00432927152421003	-0.00611927513218097	0.221805052339152	13486934.4	14.4932479161472	0.550843122804526	0.00592658612361714	0.0287140327747418	141.797600946103	0.654761904761903	0.756042321504667	0.746508872547713	0.775109219418575	2.09302043702089	-49632770.5780697	0.6046761827906	1.67159211312349	-0.0387000232687683	1.25193100071225	1.22216114672365	1.26011806329127	1.23432847910866	0
2006-04-13	0.0582280855718357	18.0106191273867	630875969	0.488095238095234	54.3968319028975	0.0554699300697664	0.716494344130107	0.160883161377074	2576843.73379485	103.422791218342	-1.2751976025259e-10	-656553.535657047	0.0415015877255491	58.8523348225176	376.132146878983	105.964109686485	0.0639912749287701	0.0225676674250096	0.6	2.51486952741261	0.0531703216936681	98.1842158977072	0.0121289210300177	-0.00246963589974123	0.260286998419423	13869193.5	12.3961772415822	0.758294957227642	0.00557033418296204	0.0291063181974116	73.7147595356573	0.511904761904766	0.674663134971367	0.722560293355598	0.578868818202905	1.99072224450594	-62380348.0780693	0.453074692622532	-1.07644852496193	-0.0266579352817244	1.25749545940171	1.22911672008547	1.25201006569845	1.23459495027305	1
2006-04-14	0.0604141229141236	18.4095436117044	644900804	0.233766233766195	61.158527228513	0.120357201442673	1.00420401007652	0.162193357450296	3850382.53754617	107.961193781401	-1.23337012082616e-24	193373.409955982	0.0430888852363247	63.5700809491299	365.372007777352	110.39761304077	0.09737802706553	0.0282870628935071	0.6	1.97782448263093	0.0778734860309066	97.9199479964427	0.025535109112083	0.00313131310262362	0.303265295434318	14273047.45	10.0025175063255	0.457376951722207	0.00857750227543602	0.0316291994904435	95.1478896643458	0.766233766233806	0.705186678725513	0.716769088478903	0.682021859218733	2.30159362672333	-49357287.0066408	0.425338773716041	2.78690010039225	0.0504853964056738	1.27864040242165	1.24247142094017	1.26793515894617	1.2464477493946	0
2006-04-17	0.0618052375864886	19.0217884705883	631558465	0.272727272727243	59.9107320256946	0.0949987699602986	0.910623780935746	0.16467953045211	3588020.74065042	106.602758881154	1.02109594299348e-10	393051.365518185	0.0466736807381876	64.3907949072522	353.242606848727	105.692503943221	0.12520032051282	0.0227679767444323	0.5	2.18911178720804	0.101973362647338	97.8198426473837	0.0353418402542396	0.00957341853294681	0.342318766438199	14603072.85	7.66203410092493	0.3722647775243	0.00743393700866745	0.0318782829376857	105.584725536994	0.727272727272758	0.712548694907928	0.715362290621911	0.706921503479961	2.4610404969259	-51025079.3816382	0.306410211371818	0.832716553457646	-0.00644229668514873	1.28309196937322	1.25387856125356	1.27576965843325	1.25462791448784	0
2006-04-18	0.0612090455840472	19.3378489770484	620627356	0.376623376623371	56.5947234081035	0.0532432695439608	0.764130766606275	0.166049979216322	1024444.41513251	104.298380319081	-3.3990915842153e-11	-177333.579560671	0.0502228066330663	58.2830911153144	336.527978900498	103.16617405823	0.10294248575498	0.0113642808693547	0.4	3.2977896836443	0.084588198208537	97.9314117413294	0.0441801898204812	0.0164947727904537	0.368241057566654	14336242.25	4.4688442711177	-0.554916505774461	0.00433733821604046	0.0320290216222685	71.620893914913	0.62337662337663	0.682824671064162	0.704516417435995	0.639441178320496	2.41325820436664	-59223411.1316375	0.130672926100319	-0.905126688540767	-0.0173851644388007	1.27307594373219	1.2586083511396	1.27357337983869	1.25727389778997	1
2006-04-19	0.0631963522588536	20.172804446381	642764068	0.194805194805193	60.6947298754775	0.0799416456694975	0.91167541102196	0.169884769881328	1999809.22736716	106.851898239889	2.8848729226416e-11	309474.459134579	0.0538432717419131	65.3671138919953	330.347788289186	108.291605674229	0.13076477920228	0.0112951631886939	0.4	1.92327981853038	0.10531938563576	97.7944155307831	0.0536227721945794	0.0239203726712788	0.395021987216393	15077675.1	7.6444800543717	0.538524610131628	0.00867808921505016	0.0311105305234603	88.551549652122	0.805194805194808	0.723614715774377	0.710882516882122	0.749079113558887	2.59511030203567	-51844507.1316408	0.293270992126975	2.28422727923922	0.0302285201460595	1.28086618589744	1.26639859330484	1.28509293105105	1.26652083155103	0
2006-04-20	0.0629976215913729	20.9481202393327	628783958	0.319999999999981	56.9692544191453	0.0479676822417907	0.757364665013705	0.172159741790846	-45336.0641079247	104.34414646898	2.76850472802775e-11	256094.442775127	0.0534865756720759	64.057615564686	321.189653945659	107.456182439065	0.0612090455840499	0.0127217122765776	0.4	2.30292247441786	0.0488797170169246	97.8961947062771	0.0601988256593402	0.0311760632688911	0.411346180672378	15314873.9	5.90307068932716	0.299215717074908	0.00731081438226942	0.0319310722934885	73.6778009742532	0.68000000000002	0.709076477182925	0.710280503649057	0.706668424250661	2.54672222135581	-60232573.1316398	0.235031261570567	0.144767856866232	-0.0193274248348652	1.29032576566952	1.27391061253561	1.28442594382511	1.26953376570052	1
2006-04-21	0.0627988909238922	21.2928755096031	646263329	0.287878787878757	58.4935137811982	0.0935759090112895	0.797478203545533	0.168354392596828	1182543.02723521	104.846791372832	-3.98568124333971e-11	-53452.3779713623	0.0531655492092229	57.6492306354353	307.470496789638	102.192145748721	0.06677350427351	0.00431430535990562	0.5	2.27495930827494	0.0528554796317084	97.917413752495	0.0692652758442127	0.0387939057839554	0.422932559082301	15830535.2	6.22020828212493	0.327493157279154	0.00740362282437355	0.0319399449535214	56.8662674650695	0.712121212121244	0.710091388829031	0.710217465375715	0.709839235735664	2.56658388045889	-52463963.7983013	0.229636328220441	0.43087286086304	0.0107835417433064	1.28976931980057	1.28420486111111	1.28861833458236	1.27452819304531	0
2006-04-24	0.0647861975986993	19.9530495715486	622496616	0.838709677419318	46.7285428701566	-0.00196611187347673	0.320079531237746	0.154473272324324	-4916334.23824435	97.2498117120072	-1.40702067413452e-10	-969474.317240909	0.0496164233143437	48.9470030150787	286.990598489582	91.353385919594	-0.00278222934473016	-0.00415414912216577	0.4	-37.4102154828761	-0.00230588029812331	98.5726617089956	0.0688595834661025	0.0448070413203849	0.401572850877763	16575025.7	9.36031961790368	0.166360333347328	-0.00035341384492479	0.0368043151712574	-63.3763440860145	0.161290322580682	0.527157700079581	0.649197543610337	0.28307801301807	1.97216942294622	-74910303.8538567	0.25587857837647	-5.52517459144572	-0.0734194522881174	1.27251949786325	1.27780573361824	1.26080873896184	1.26192116662267	0
2006-04-25	0.0659785816035836	19.5135607233069	605436253	0.876712328767092	43.3166892369101	-0.0220005350497216	0.140482546583719	0.152907490250818	-7424527.50821063	94.5557497156062	-2.54088853263987e-10	-1375848.41997196	0.0465845067207284	41.8806724121589	277.041929705712	92.3274898794774	-0.0222578347578299	-0.00799335578057171	0.3	-4.99834537532482	-0.018816379018548	99.3180437927812	0.0644187629978579	0.0487293856558795	0.350438196404368	16968285.7	8.48414406064447	-0.121281413234549	-0.00282009208408849	0.0374375604341592	-172.184811073698	0.123287671232908	0.39253435713069	0.563643148117121	0.0503167751578275	1.26918316357465	-76616340.1538539	0.0513928646155177	-6.68379024678606	-0.0280934417417758	1.25304389245014	1.26305991809117	1.23114009116924	1.24553600825201	1
2006-04-26	0.0747227309727322	19.6746423176831	628281779	0	60.0643001896359	0.0360549227029317	1.04940003411474	0.153791499193291	-917451.992124788	108.279881453879	6.70887781301778e-10	1749172.71523319	0.046031627812481	50.16507673624	279.626350164597	109.230615832827	0.0806846509971499	-0.00771989489791066	0.4	2.76585954855322	0.061633267515614	98.6779086759376	0.0740166731858374	0.0537868431618711	0.336891432171016	17158574.15	10.3074738997455	0.249302492511166	0.00932623680859764	0.0553849511191233	59.2019058963623	1	0.595022904753794	0.574103066996012	0.636862580269357	1.83989062736782	-53770814.1538539	0.362534982592421	6.35722267129029	0.141461524491006	1.26139058048433	1.27112838319089	1.27071521866174	1.26450500196014	1
2006-04-27	0.0818770350020365	21.1913325806019	714134239	0.15322580645162	65.5457467489732	0.0596812328666489	1.24271863784474	0.19399986580918	3665621.14387067	114.172997389908	2.23651770889414e-10	5855747.50712246	0.0453004008693152	66.2630929362707	272.34191462035	110.702649304697	0.11963586182336	0.000861003755422012	0.5	1.99794222868165	0.0868050235870614	97.6682384579327	0.0886547589214868	0.0607604263137942	0.371952912604456	20805238.3	32.2918070782316	1.97081118682804	0.0148599390547351	0.05698933382319	308.000000000007	0.846774193548381	0.678940001018656	0.609048711670227	0.818722579715514	2.81290531578007	-47488926.8367867	0.429616951399156	11.4581510565393	0.0638717793402157	1.2925515491453	1.29143865740741	1.32677575000051	1.29621260390885	1
2006-04-28	0.0928072217134729	23.5336219348919	782632332	0.117318435754178	72.3218688454079	0.122673609310339	1.41504729321367	0.264920559320937	15526539.6658723	123.809831533488	3.1890724253404e-10	8872080.95313634	0.0558942741434774	71.6548038512801	261.175972958209	122.836261625725	0.31717414529915	0.0224569072963696	0.5	1.7772979356812	0.223067240685977	96.110605070809	0.115435931860027	0.0716955274230408	0.476061562941998	23711900.65	38.4666442540893	1.22912822544147	0.0176862581658647	0.0604328496295808	301.864227928248	0.882681564245823	0.746853855427712	0.654983759589389	0.930594047104358	4.41189166081273	-13652519.4512416	0.762149120737589	18.2506711767284	0.0975621938301469	1.35042191951567	1.32009561965812	1.41330215598325	1.34896576100701	0
2006-05-08	0.0926084910459929	25.7086049067326	741455183	0.128491620111722	71.7484267465825	0.0994510281727795	1.1794178664465	0.321402805034945	17948801.8516033	121.463354033698	1.31591434090583e-10	4935736.94438894	0.0680576101249222	72.9571338558981	251.219846894416	124.552032385674	0.34499643874644	0.0536717269489799	0.5	1.95708271307816	0.246211308698269	95.1448184841469	0.138872908721112	0.085131003682655	0.610594409031795	25140864.3	35.9649035453848	0.277066380844953	0.0146172349987522	0.0603330273436376	203.357474466111	0.871508379888278	0.788405363581234	0.69945762758667	0.966300835570361	5.52525054463471	-17181989.3655279	0.818057621984273	13.8228339947674	-0.00351386726943193	1.42554211182336	1.34903080484331	1.46913160707525	1.39111571523469	1
2006-05-09	0.105128523097275	28.2985965713107	791011903	0.0500000000000114	76.961606327234	0.142315029479671	1.28378447704018	0.393889842778742	28468785.3485223	130.259562374004	2.68977805999487e-10	3539206.98395194	0.0819330872415851	79.2548628140329	242.780625921915	132.115766627766	0.42846331908831	0.0923287402524729	0.6	1.4472617807109	0.284909431170458	93.7829169554243	0.170993905661477	0.102303584078419	0.794467843674629	26612487.7	35.1973130312641	1.12915134952888	0.0239916650282662	0.0617153718873366	179.066305099165	0.949999999999989	0.842270242387486	0.747061832520276	1.03268706212191	7.12506271197855	19395589.6820884	1.29308583935643	17.0905570510238	0.0891835188778624	1.53683128561253	1.39493758903134	1.55550395956014	1.45241261510655	0
2006-05-10	0.112282827126579	30.8728414658288	749264136	0.156779661016955	74.1802467695945	0.11204213973637	1.07860520762663	0.456946321958514	27260064.1697189	125.931127979053	3.11502749663505e-10	3073011.94411052	0.0956837207338048	83.9033003945684	231.422941556449	132.525681063475	0.40898771367521	0.107518681310278	0.5	1.43029448122047	0.275122190877021	93.1104804687512	0.196149686203406	0.121072804503417	0.982490129117752	27736867.55	32.5215586446106	1.00398315449045	0.0247207508391112	0.0611330113659172	149.160115135113	0.843220338983046	0.842586941252672	0.778903535431074	0.969953752895868	8.0684475604262	9654444.04875263	1.17024470895856	8.71616186736541	-0.0162295369785853	1.60694346509971	1.43416702279202	1.60381143006763	1.49750602528402	1
2006-05-11	0.11884093915344	33.3558552294831	795045931	0.17551020408163	74.4782353691256	0.0958515488280076	0.99105787501141	0.502809626742692	18649538.3191179	124.245229517946	8.76681411394901e-11	-389696.131866422	0.11284080169297	85.2997173136552	212.342430630708	131.747799053799	0.43959223646724	0.110892592771469	0.6	1.48744068830256	0.297403932874328	92.7315998641446	0.222794688974084	0.14141718139755	1.15684269972987	29135730.9	30.8131116983744	1.18305683638377	0.0213726852628992	0.0608197146599778	124.437455539331	0.824489795918371	0.836554559474572	0.798120543445574	0.913422591532568	8.71081486263117	-9108586.68895132	1.31170488212328	5.22551929531753	0.0048965775585067	1.66091871438746	1.47673513176638	1.63879863975069	1.53591821325362	1
2006-05-12	0.123809205840456	35.6615108671622	832609839	0.0857142857142912	76.6101108511423	0.109305834844484	0.996047250915813	0.535222675740434	15843818.7727091	126.056422065118	4.22443805891481e-11	1340688.65879846	0.128107393481998	86.2500492742673	205.151979602884	146.863379959456	0.46185007122507	0.102265902990353	0.6	1.4009571156776	0.302369245231226	92.3172766924257	0.252098464268867	0.163553437971813	1.32206603833447	30415776	27.5099387034271	1.0351013333369	0.0243899748770866	0.0603810019154912	111.179955984424	0.914285714285709	0.862464944411618	0.819568677100922	0.94825747903301	9.39218490291085	-862850.786513464	1.3066059214651	5.41280316977979	0.0351938325029568	1.69764414173789	1.52403303062678	1.68252646140074	1.57847528442584	1
2006-05-15	0.12798254985755	37.8024768164356	867716286	0.0489795918367314	77.4403219689053	0.111906773678944	0.961360969446319	0.562761868192495	19584539.7241774	125.489957240825	1.63166386326113e-11	1589159.32019008	0.146584249899559	88.8132120353268	199.105976886974	153.184663457706	0.5119301994302	0.0904768990672693	0.7	1.32402713601402	0.335744606042256	92.0592622153473	0.280218191212025	0.186886388619856	1.4700150310798	31169151.05	24.1459105885409	1.16677202791699	0.02663154532978	0.0592895053743457	97.2119583473296	0.951020408163269	0.891983432328835	0.843706928843559	0.988536439299385	9.90008776585711	20960075.727003	0.963017811246971	4.73479174933542	0.0140479359761647	1.74049047364672	1.58301629273504	1.72002503053497	1.61784744522176	0
2006-05-16	0.132752085877086	38.3716092994873	832458805	0.224489795918361	65.4814713696255	0.0647831779396634	0.778545022331741	0.573275991278221	14270104.3333053	115.686114851701	-2.19331021593565e-10	-1669495.72093113	0.158961603522906	82.0643574068967	183.568309722107	124.115057365971	0.37838319088319	0.0558080545684012	0.7	1.77736163424047	0.255987461845313	92.5557376562245	0.293547821364245	0.208218675168734	1.55613111216788	31371402.55	21.2851616211008	0.465440326924909	0.019678779433752	0.0642747389707751	63.170842234739	0.775510204081639	0.853159022913103	0.846857626866741	0.865761815005827	9.55300439450239	3984251.54181801	1.07672398078696	-3.13669197913798	-0.0689736024536366	1.72991800213675	1.63337464387464	1.70514545601667	1.62830905645054	1
2006-05-17	0.136130507224257	38.900089462321	858980330	0.212244897959175	65.8773864646215	0.0716887785370094	0.759690100591624	0.574507881452829	8512072.14052083	114.621930811266	-4.85961203622879e-11	-1998346.11489488	0.181076759852805	79.5127864577393	171.426046149236	117.015548313051	0.47854344729345	0.0346453417916691	0.7	1.65318104554756	0.33437649363435	93.0132548035739	0.30585209535091	0.227745359205169	1.59497142659737	31896375.8	16.9637644814379	0.64032106227701	0.0214019077195294	0.0634723042375534	54.617853526252	0.787755102040825	0.831357715955677	0.841690989896386	0.810691168074259	9.20485492328282	-3900526.16088114	0.549183998570743	-2.23476064268164	0.00496957950092003	1.72657932692308	1.6667613960114	1.69800796901586	1.6383861361894	0
2006-05-18	0.139707659238909	38.3743738961575	835694601	0.265306122448983	62.5304452318986	0.0965462414237944	0.695994227082324	0.560350337990634	6505442.32680644	110.609404809999	-2.57298334874742e-10	-310427.10280901	0.204672204872529	78.0926215797548	163.425851888488	103.858470948856	0.47576121794871	0.015580013522412	0.6	1.84421776770328	0.340754427747843	93.6366399713189	0.316139798513704	0.245424247066876	1.58655884802703	32295807.6	12.5921029380729	0.286819298054834	0.0190930993508934	0.0644660746323693	29.717676332663	0.734693877551017	0.799136436487457	0.827506138760077	0.742397031942219	8.64157559785006	-19571.3275489479	0.393606839109865	-3.84298506140143	-0.0217155076282826	1.71433751780627	1.68762811609687	1.68119331718816	1.64005484116092	1
2006-05-19	0.139906389906389	38.2277660181812	860945147	0.179591836734692	65.5732132373446	0.0948109012401905	0.742915774560334	0.54927698738057	8853555.50013704	112.991223785221	1.64469285850682e-10	316543.955050256	0.215194738932724	81.7132462508166	158.977726408599	107.9201083116	0.35612535612536	0.00114458748256059	0.6	1.41616643310815	0.234141135440446	93.9388968180996	0.331200598584203	0.262579517370341	1.56001722899075	32857093.15	9.40640636775134	0.0605617909906009	0.0266824963786009	0.0591017062367733	42.2152274075089	0.820408163265308	0.806227012080074	0.820413096533409	0.777854843173404	8.38576172858838	12946925.267047	0.048125986665895	-0.40605901907364	0.0348482321836093	1.70153926282051	1.6995917022792	1.68945915471613	1.65204320272659	0
2006-05-22	0.139508928571427	38.0916301314888	835299627	0.232758620689647	62.9516356484233	0.0935435118975405	0.688380322660646	0.535274290131371	8648127.31381876	109.7430234712	0	380895.914018078	0.216514514391122	79.6557503020255	155.078401761089	97.1022614260928	0.23927172364673	-0.0185684381434133	0.6	1.40090554534451	0.153826324137665	94.3953422696495	0.337184222821974	0.277500458460668	1.51076266174606	33472252.2	6.85608861340601	0.407611077812678	0.02749634690577	0.0583691073584759	28.7325214253503	0.767241379310353	0.793231801156834	0.811352664741217	0.756990073988067	7.9468798209323	11597161.0565253	-0.031782600579512	-1.14721365534037	-0.0164430319625656	1.67816853632479	1.70932950498576	1.68569561525235	1.6567932633808	0
2006-05-23	0.13414320054945	36.6862139086978	811911479	0.555555555555558	54.5037198266652	0.0717026456687965	0.547377438811918	0.510740879266456	1505798.74424178	102.161484320679	-2.27708089035142e-10	-1528040.04184472	0.203940977929364	75.762609109836	154.133574965033	92.8007414346233	-0.00834668803419003	-0.0214702401806001	0.5	2.28987371112822	-0.00527544200077434	95.3001965958043	0.331150615609501	0.288230489890435	1.419733447155	34095104.15	4.15920955895718	0.0234740988428115	0.0123791721365773	0.0505364972386478	-51.8518518518518	0.444444444444442	0.67696934891937	0.766558226133935	0.49779159449024	7.02089842662108	-10329227.6934743	-0.217885244753911	-5.02366104161315	-0.0615395723082922	1.65869293091168	1.69430546652422	1.64979983680641	1.64246872093239	1
2006-05-24	0.132354624542124	35.6879766304026	838201615	0.483221476510063	57.5697263824111	0.055038616174073	0.593115608304331	0.486633829592204	-2653756.37551406	104.323223453597	7.41982328247169e-11	-512974.7596154	0.196004490375489	73.4515053892756	156.287331870439	95.2782114297347	0.0472978988604	-0.0239794365321475	0.6	2.54210394579227	0.0294815266123209	95.8169415173727	0.333285767137239	0.297241545339796	1.31811097777075	34302775.35	2.72336142332741	-1.1834364297651	0.00993492766704306	0.0485337312452112	-52.0064604298667	0.516778523489937	0.623572407109559	0.718896286459143	0.432924648410391	6.4628280608638	-14084961.4077587	-0.235679825676805	-1.54232520849716	0.0312431013436633	1.64756401353276	1.68707167022792	1.64256269391083	1.6398541186028	1
2006-05-25	0.122815552503051	34.7610420148426	859304458	0.504587155963287	60.2914400049986	0.0883193780139404	0.638499083709751	0.458194120982162	235303.010091687	106.021401879263	1.92576899070142e-11	1157366.7576456	0.175976006054136	71.0014270228058	160.463590442365	94.6555506143505	-0.0528623575498499	-0.0185130939949775	0.6	4.10178725546607	-0.0310647933945937	96.0433150340926	0.341463187854931	0.306085873842823	1.2240424684878	34658912	0.121289342326416	-1.17739813472261	0.0046900118759857	0.0411727239306211	-44.6521287642768	0.495412844036713	0.580852552751944	0.672881708556743	0.396794241142345	6.18324216297754	988497.877958101	-0.276104634674012	1.40329437297204	0.0286371988709478	1.65312847222222	1.68373299501425	1.65350389826724	1.64631451648958	1
2006-05-26	0.131559701872201	35.5076861063281	930211986	0.157894736842112	67.8651211489281	0.114081865438882	0.837442456468994	0.435975254437809	11033312.8515143	114.281410128364	4.43875202010339e-10	6220209.21669109	0.164222870553004	73.1843488351285	161.352252856352	102.324954025429	0.13632923789174	-0.00662719017369078	0.6	2.13401979031374	0.077121733128407	95.5129797775833	0.356502193676303	0.316169137809519	1.17581128052786	37330319.85	10.7972998999445	0.543493139050966	0.0118203953621998	0.0477607364067321	165.614186851215	0.842105263157888	0.667936789553925	0.671233402222471	0.661343564216834	6.66970315900897	32710286.7200608	-0.108432756599087	9.08829454629883	0.0919569895444153	1.67928142806268	1.6904103454416	1.71458780183628	1.68094016966863	0
2006-06-12	0.132354624542123	34.9285687764214	927943286	0.94782608695651	51.7404053758838	0.148420005820699	0.455916344165271	0.378789798448388	14447652.0728677	97.8704262948829	0	5443419.22631759	0.143249141646583	69.8936571639484	170.443244643815	95.0180516580482	-0.11685363247863	-0.00485457982265841	0.5	-3.32556926698314	-0.0708351289599559	96.3638212866531	0.352192853334339	0.323373880914483	1.09267667003383	36255419.2	1.85917003800642	-3.08391089194494	-0.00436385157073197	0.0557540282524379	-134.59459459459	0.0521739130434899	0.46268249738378	0.601716433942907	0.184614624265526	5.78492098928991	32710286.7200608	-0.233849358161693	-4.37320510292258	-0.143060284529856	1.66203160612536	1.67010007122507	1.67369834343691	1.66475458002673	0
2006-06-13	0.136130507224256	32.663023830687	841219262	1	42.0753874145736	0.0284391015211345	-0.00761278506777715	0.311421296066883	-8673411.74787075	83.8411910694274	-1.17864993986814e-10	-9808531.83983269	0.106990986147643	56.7380084718045	178.261055692799	81.4929274693549	-0.39785879629629	-0.0116723359431219	0.5	-1.31986361525857	-0.254610036000504	98.173662598464	0.333019748135927	0.325303054358772	0.937666813450333	39738602.25	14.9383553584056	0.73108497399226	-0.0130760893289996	0.0662672946318659	-264.104638619201	0	0.308454998255854	0.503962622047223	-0.0825602493268849	3.94856799078722	-54013737.2799392	-0.316954077789162	-14.9710738393913	-0.148581074537591	1.62085461182336	1.63977377136752	1.57317333175946	1.61154889427724	1
2006-06-14	0.130566048534796	31.1018573962245	871696559	0.869158878504676	42.3688936842559	0.0261699021237752	-0.0353797418734823	0.291896636012006	-11248632.2139645	84.109702955433	-1.59249085620152e-10	-9446007.08633819	0.0680397753214317	49.1984846720294	188.513067114452	83.6196806787457	-0.4173344017094	-0.024443206429496	0.5	-1.29976181431502	-0.264610809366623	99.5932817870027	0.312753285480721	0.322793100583162	0.749373432313538	40120190.8	11.9642947437145	-0.406904477233763	-0.0131370337542297	0.066249872302779	-211.744824672583	0.130841121495324	0.249250372669011	0.419058538921152	-0.0903659598352725	2.47215023521492	-32771984.8253902	-0.286916905477224	-12.8226033194084	0.00404716261004573	1.57077448361824	1.6091692485755	1.50801147687098	1.56902868933484	0
2006-06-16	0.126392704517703	29.427238606401	842451370	0.878504672897201	42.1389493930113	-0.00379483038313241	-0.0204408478731694	0.304205386296183	-16012185.7286301	83.9410828678115	8.20527451290809e-11	3428.00703347661	0.0403066558915972	47.4335846638682	195.594141778226	80.4297001167278	-0.3032629985755	-0.0473493530037026	0.5	-0.918183007646219	-0.199684369523032	100.735332640405	0.295543904984615	0.317343261463452	0.550202841729641	37289827.25	9.20652668064402	-0.250328614268632	-0.0159841372471237	0.0648252362962081	-144.979776350227	0.121495327102799	0.206665357480273	0.348260811774192	-0.0765255511075649	1.24252638475961	-50319098.2253879	-0.309924471230694	-10.7658393252437	-0.00404716261004573	1.51012188390314	1.58162517806268	1.46271542071551	1.53322771098388	0
2006-06-19	0.125995243182742	28.4269911036105	822365725	0.876712328767128	41.6520640349907	-0.0369422575419087	0.0308463677737411	0.340754689392254	-13359016.0110652	83.8381843505745	-2.63028450739537e-10	-193132.564881634	0.0104155252392479	40.9758663106506	203.09351104044	81.0999826040258	-0.32273860398861	-0.0933983953502885	0.4	-0.780810384069487	-0.212797746774284	101.672038378051	0.277732164211088	0.309421042012979	0.353054066979785	34869204.85	4.78765338358148	-0.5583794080061	-0.0175739800162467	0.064300233769724	-130.128896420685	0.123287671232872	0.178872795397806	0.29179813964873	-0.0469778931040421	0.192751795877788	-39415462.368247	-0.270257719706672	-8.36704010007136	-0.00814379775033192	1.41496964031339	1.54712553418804	1.42880841081889	1.50191256190056	1
2006-06-20	0.118443477818477	27.4706246988431	842592040	0.853881278538812	42.5456992015022	-0.0155573383750281	0.10642871282492	0.36970852210434	-7925979.93423149	85.235627518119	6.54433010492131e-11	28919.8759682221	-0.0153022613960065	47.0472947617875	217.866633595228	87.1291713262594	-0.27265847578347	-0.10588792698475	0.5	-1.18767393676368	-0.180912812651395	102.280003865911	0.269423227735504	0.301421479157484	0.171711736574842	33821663.15	1.11991106413476	-0.555693254319326	-0.0120832662374332	0.0630573252626638	-94.6873920552671	0.146118721461188	0.167954770752267	0.250517016683243	0.0028302788903154	-0.570287695726668	-27705490.5261433	-0.246293587049326	-2.37072604717969	0.0101694264946065	1.37156686253561	1.51679923433049	1.41084078646235	1.47882037569124	1
[truncated: 2,695 more rows]
