# Supplementary material for: An Empirical Study of Machine Learning Algorithms for Stock Daily Trading Strategy
Source: Hindawi journal article supplement (doi:10.1155/2019/7816154), 2019-01-01
Supplement: f1 [file 7816154.f1.zip › Optional Supplementary Materials(Data, code, and results)/SPICS/AAPL.csv]

	AAPL.Open	AAPL.High	AAPL.Low	AAPL.Close	AAPL.Volume	AAPL.Adjusted
2001-01-02	1.0625	1.089286	1.040179	1.0625	113078000	0.95246
2001-01-03	1.035714	1.191964	1.03125	1.169643	204268400	1.048507
2001-01-04	1.295757	1.321429	1.200893	1.21875	184849000	1.092528
2001-01-05	1.209821	1.241071	1.147321	1.169643	103089000	1.048507
2001-01-08	1.209821	1.213164	1.138393	1.183036	93424800	1.060513
2001-01-09	1.200893	1.260043	1.183036	1.227679	147232400	1.100532
2001-01-10	1.191964	1.214286	1.147321	1.183036	145195400	1.060513
2001-01-11	1.160714	1.321429	1.160714	1.285714	200933600	1.152557
2001-01-12	1.276786	1.285714	1.21875	1.227679	105844200	1.100532
2001-01-16	1.245536	1.303571	1.214286	1.223214	76529600	1.09653
2001-01-17	1.254464	1.254464	1.178571	1.200893	210218400	1.07652
2001-01-18	1.272321	1.339286	1.258929	1.334821	306752600	1.196579
2001-01-19	1.388393	1.397321	1.334821	1.392857	194166000	1.248604
2001-01-22	1.361607	1.401786	1.316964	1.375	129831800	1.232596
2001-01-23	1.379464	1.495536	1.361607	1.464286	219882600	1.312635
2001-01-24	1.473214	1.477679	1.397321	1.464286	179272800	1.312635
2001-01-25	1.46875	1.46875	1.410714	1.424107	122427200	1.276617
2001-01-26	1.392857	1.415179	1.361607	1.397321	120705200	1.252606
2001-01-29	1.397321	1.553571	1.397321	1.549107	213882200	1.388672
2001-01-30	1.540179	1.571429	1.491071	1.553571	173105800	1.392674
2001-01-31	1.535714	1.607143	1.53125	1.544643	182676200	1.38467
2001-02-01	1.477679	1.535714	1.464286	1.508929	92423800	1.352654
2001-02-02	1.508929	1.566964	1.464286	1.473214	106835400	1.320639
2001-02-05	1.464286	1.46875	1.410714	1.441964	71528800	1.292625
2001-02-06	1.439729	1.5279	1.428571	1.508929	115677800	1.352654
2001-02-07	1.475443	1.491071	1.415179	1.482143	98471800	1.328642
2001-02-08	1.46875	1.504464	1.441964	1.482143	151032000	1.328642
2001-02-09	1.464286	1.486607	1.334821	1.366071	147520800	1.224592
2001-02-12	1.361607	1.428571	1.34375	1.40625	68530000	1.26061
2001-02-13	1.424107	1.459821	1.357143	1.366071	59267600	1.224592
2001-02-14	1.370536	1.401786	1.321429	1.392857	77280000	1.248604
2001-02-15	1.40625	1.46875	1.40625	1.433036	77854000	1.284621
2001-02-16	1.357143	1.392857	1.339286	1.357143	65977800	1.216588
2001-02-20	1.370536	1.388393	1.299107	1.308036	78723400	1.172567
2001-02-21	1.303571	1.424107	1.303571	1.348214	97564600	1.208585
2001-02-22	1.361607	1.383929	1.285714	1.34375	107990400	1.204583
2001-02-23	1.330357	1.348214	1.303571	1.34375	73466400	1.204583
2001-02-26	1.361607	1.40625	1.325893	1.392857	51609600	1.248604
2001-02-27	1.377229	1.388393	1.334821	1.383929	87129000	1.2406
2001-02-28	1.383929	1.388393	1.294643	1.303571	127058400	1.168565
2001-03-01	1.272321	1.339286	1.227679	1.339286	82615400	1.200581
2001-03-02	1.308036	1.459821	1.303571	1.375	101550400	1.232596
2001-03-05	1.383929	1.464286	1.375	1.455357	81043200	1.304631
2001-03-06	1.479907	1.575893	1.477679	1.535714	182950600	1.376666
2001-03-07	1.522321	1.544643	1.482143	1.517857	104885200	1.360658
2001-03-08	1.477679	1.508929	1.459821	1.486607	51214800	1.332645
2001-03-09	1.473214	1.477679	1.428571	1.446429	74783800	1.296627
2001-03-12	1.40625	1.419643	1.294643	1.330357	97755000	1.192577
2001-03-13	1.348214	1.397321	1.299107	1.397321	110832400	1.252606
2001-03-14	1.321429	1.464286	1.316964	1.459821	119443800	1.308633
2001-03-15	1.491071	1.526786	1.40625	1.40625	132329400	1.26061
2001-03-16	1.357143	1.450893	1.348214	1.401786	117579000	1.256608
2001-03-19	1.410714	1.473214	1.392857	1.46875	89002200	1.316637
2001-03-20	1.479907	1.495536	1.40625	1.40625	124801600	1.26061
2001-03-21	1.412943	1.491071	1.383929	1.4375	92843800	1.288623
2001-03-22	1.455357	1.553571	1.441964	1.544643	180825400	1.38467
2001-03-23	1.575893	1.683036	1.571429	1.642857	236222000	1.472712
2001-03-26	1.652143	1.696429	1.509286	1.555714	183612800	1.394594
2001-03-27	1.567143	1.646429	1.564286	1.633571	135955400	1.464388
2001-03-28	1.577143	1.607143	1.535714	1.583571	146165600	1.419567
2001-03-29	1.555	1.675	1.535714	1.609286	153266400	1.442618
2001-03-30	1.610714	1.622857	1.524286	1.576429	100087400	1.413163
2001-04-02	1.577857	1.618571	1.528571	1.542143	85227800	1.382429
2001-04-03	1.525714	1.528571	1.437857	1.445714	92171800	1.295987
2001-04-04	1.411429	1.446429	1.339286	1.392857	171371200	1.248604
2001-04-05	1.471429	1.607143	1.428571	1.490714	111690600	1.336326
2001-04-06	1.485714	1.502857	1.421429	1.470714	81222400	1.318397
2001-04-09	1.477857	1.524286	1.432857	1.467143	66645600	1.315196
2001-04-10	1.492857	1.621429	1.484286	1.574286	114343600	1.411243
2001-04-11	1.641429	1.642857	1.52	1.557143	83524000	1.395875
2001-04-12	1.53	1.644286	1.510714	1.601429	74733400	1.435574
2001-04-16	1.577857	1.6	1.49	1.531429	71306200	1.372824
2001-04-17	1.514286	1.515	1.4	1.457143	171299800	1.306231
2001-04-18	1.540714	1.72	1.505714	1.627857	275210600	1.459266
2001-04-19	1.825	1.839286	1.685714	1.837143	468417600	1.646876
2001-04-20	1.780714	1.830714	1.757143	1.788571	173350800	1.603335
2001-04-23	1.738571	1.785714	1.714286	1.732143	135381400	1.552751
2001-04-24	1.737857	1.767857	1.679286	1.716429	94284400	1.538664
2001-04-25	1.729286	1.775714	1.683571	1.765714	82695200	1.582845
2001-04-26	1.797857	1.864286	1.762857	1.763571	199924200	1.580924
2001-04-27	1.8	1.877857	1.767857	1.871429	113253000	1.677611
2001-04-30	1.907143	1.937143	1.776429	1.820714	123694200	1.632149
2001-05-01	1.815	1.892857	1.8	1.852143	106813000	1.660323
2001-05-02	1.881429	1.907143	1.84	1.899286	92131200	1.702583
2001-05-03	1.855	1.875	1.766429	1.782857	75385800	1.598213
2001-05-04	1.731429	1.846429	1.711429	1.839286	70263200	1.648797
2001-05-07	1.83	1.84	1.774286	1.782857	69137600	1.598213
2001-05-08	1.810714	1.817857	1.710714	1.755	78859200	1.57324
2001-05-09	1.724286	1.753571	1.690714	1.712857	81222400	1.535463
2001-05-10	1.729286	1.75	1.639286	1.642857	72244200	1.472712
2001-05-11	1.643571	1.677857	1.625714	1.632143	50761200	1.463107
2001-05-14	1.635	1.691429	1.625	1.663571	77305200	1.491281
2001-05-15	1.669286	1.821429	1.645714	1.655714	59256400	1.484238
2001-05-16	1.661429	1.75	1.632143	1.721429	80582600	1.543146
2001-05-17	1.730714	1.737857	1.660714	1.682143	83029800	1.507929
2001-05-18	1.668571	1.688571	1.651429	1.680714	39762800	1.506648
2001-05-21	1.687857	1.707857	1.646429	1.682857	115249400	1.508569
2001-05-22	1.714286	1.723571	1.671429	1.678571	103229000	1.504727
2001-05-23	1.696429	1.696429	1.632857	1.659286	70260400	1.487439
2001-05-24	1.663571	1.664286	1.615714	1.657143	67939200	1.485519
2001-05-25	1.657143	1.663571	1.607143	1.625714	39685800	1.457345
2001-05-29	1.594286	1.607143	1.486429	1.533571	128997400	1.374745
2001-05-30	1.482857	1.482857	1.378571	1.412857	194269600	1.266532
2001-05-31	1.414286	1.445714	1.392143	1.425	110723200	1.277418
2001-06-01	1.437857	1.506429	1.427143	1.492143	114018800	1.337607
2001-06-04	1.505714	1.507857	1.461429	1.475714	70480200	1.32288
2001-06-05	1.485714	1.507143	1.453571	1.495714	117948600	1.340808
2001-06-06	1.495	1.495	1.452143	1.480714	55794200	1.327362
2001-06-07	1.479286	1.55	1.460714	1.547143	81295200	1.386911
2001-06-08	1.546429	1.546429	1.479286	1.522857	85656200	1.36514
2001-06-11	1.503571	1.505	1.425	1.431429	73500000	1.28318
2001-06-12	1.412143	1.477857	1.411429	1.450714	75948600	1.300469
2001-06-13	1.53	1.552143	1.432857	1.462143	127871800	1.310714
2001-06-14	1.431429	1.460714	1.412143	1.42	74337200	1.272936
2001-06-15	1.435714	1.482143	1.382143	1.46	113656200	1.308793
2001-06-18	1.457857	1.489286	1.428571	1.452143	86478000	1.301749
2001-06-19	1.489286	1.528571	1.429286	1.442143	80271800	1.292785
2001-06-20	1.428571	1.560714	1.427143	1.547857	107905000	1.387551
2001-06-21	1.539286	1.642857	1.507143	1.606429	85332800	1.440056
2001-06-22	1.605714	1.642857	1.554286	1.59	71506400	1.425329
2001-06-25	1.607143	1.714286	1.603571	1.713571	109887400	1.536103
2001-06-26	1.667143	1.697857	1.643571	1.696429	68195400	1.520736
2001-06-27	1.702143	1.714286	1.607143	1.667143	93532600	1.494483
2001-06-28	1.646429	1.707857	1.638571	1.681429	87102400	1.507289
2001-06-29	1.69	1.792857	1.657143	1.660714	128847600	1.48872
2001-07-02	1.688571	1.730714	1.652857	1.707143	57512000	1.53034
2001-07-03	1.679286	1.727143	1.678571	1.702857	28135800	1.526498
2001-07-05	1.685714	1.697857	1.643571	1.656429	38073000	1.484878
2001-07-06	1.625714	1.64	1.551429	1.573571	75730200	1.410602
2001-07-09	1.577857	1.642857	1.548571	1.621429	84366800	1.453503
2001-07-10	1.639286	1.647857	1.488571	1.51	98817600	1.353615
2001-07-11	1.502143	1.610714	1.5	1.61	117626600	1.443258
2001-07-12	1.664286	1.772143	1.664286	1.74	153700400	1.559794
2001-07-13	1.723571	1.786429	1.702857	1.775	113685600	1.591169
2001-07-16	1.777143	1.792857	1.707857	1.711429	69666800	1.534182
2001-07-17	1.712857	1.801429	1.643571	1.792857	161957600	1.607177
2001-07-18	1.555714	1.627143	1.458571	1.485	284253200	1.331203
2001-07-19	1.516429	1.53	1.410714	1.425714	215285000	1.278058
2001-07-20	1.407143	1.432857	1.392143	1.427143	111146000	1.279338
2001-07-23	1.435	1.464286	1.393571	1.395714	60340000	1.251165
2001-07-24	1.385	1.422857	1.337857	1.363571	87094000	1.222351
2001-07-25	1.365714	1.378571	1.283571	1.319286	110969600	1.182652
2001-07-26	1.32	1.342857	1.275	1.327857	92285200	1.190336
2001-07-27	1.339286	1.375	1.321429	1.354286	83533800	1.214027
2001-07-30	1.365714	1.382857	1.322143	1.352143	60839800	1.212106
2001-07-31	1.376429	1.387143	1.322143	1.342143	58756600	1.203142
2001-08-01	1.357857	1.412857	1.353571	1.361429	76034000	1.22043
2001-08-02	1.403571	1.419286	1.375714	1.415714	63022400	1.269094
2001-08-03	1.420714	1.421429	1.357143	1.392857	46513600	1.248604
2001-08-06	1.36	1.404286	1.357143	1.366429	24913000	1.224912
2001-08-07	1.380714	1.405	1.355714	1.375	42137200	1.232596
2001-08-08	1.375714	1.407143	1.324286	1.35	69042400	1.210185
2001-08-09	1.354286	1.367857	1.337143	1.360714	50166200	1.21979
2001-08-10	1.36	1.38	1.327857	1.358571	46740400	1.217869
2001-08-13	1.364286	1.380714	1.34	1.363571	36999200	1.222351
2001-08-14	1.371429	1.382857	1.333571	1.337857	57237600	1.1993
2001-08-15	1.34	1.352857	1.3	1.317143	72319800	1.180731
2001-08-16	1.305	1.339286	1.283571	1.332143	72023000	1.194177
2001-08-17	1.285714	1.317857	1.285	1.290714	52106600	1.157039
2001-08-20	1.295714	1.302143	1.272143	1.294286	63075600	1.160241
2001-08-21	1.295714	1.295714	1.264286	1.28	46425400	1.147435
2001-08-22	1.281429	1.303571	1.257857	1.300714	43493800	1.166004
2001-08-23	1.3	1.31	1.255714	1.272143	54269600	1.140392
2001-08-24	1.285714	1.33	1.260714	1.326429	72583000	1.189055
2001-08-27	1.328571	1.378571	1.297143	1.351429	43911000	1.211466
2001-08-28	1.35	1.367143	1.314286	1.314286	42933800	1.178169
2001-08-29	1.317143	1.345	1.273571	1.273571	59992800	1.141672
2001-08-30	1.267143	1.298571	1.234286	1.273571	92173200	1.141672
2001-08-31	1.266429	1.328571	1.260714	1.325	54226200	1.187774
2001-09-04	1.321429	1.362857	1.298571	1.303571	87053400	1.168565
2001-09-05	1.302857	1.353571	1.294286	1.325	90014400	1.187774
2001-09-06	1.314286	1.352143	1.260714	1.265714	70592200	1.134629
2001-09-07	1.25	1.292857	1.228571	1.234286	60457600	1.106455
2001-09-10	1.214286	1.25	1.208571	1.240714	77211400	1.112218
2001-09-17	1.142857	1.219286	1.123571	1.213571	114501800	1.087886
2001-09-18	1.207143	1.265714	1.155	1.162857	81775400	1.042424
2001-09-19	1.178571	1.221429	1.114286	1.215714	93329600	1.089807
2001-09-20	1.163571	1.210714	1.107143	1.12	102793600	1.004005
2001-09-21	1.057143	1.160714	1.048571	1.123571	142629200	1.007207
2001-09-24	1.150714	1.202857	1.139286	1.175	73634400	1.053309
2001-09-25	1.152857	1.158571	1.096429	1.11	93601200	0.995041
2001-09-26	1.129286	1.135	1.066429	1.082143	123449200	0.970069
2001-09-27	1.089286	1.125	1.085714	1.107857	80560200	0.99312
2001-09-28	1.122143	1.136429	1.099286	1.107857	91277200	0.99312
2001-10-01	1.106429	1.142143	1.087857	1.11	52052000	0.995041
2001-10-02	1.102143	1.130714	1.062857	1.075	58970800	0.963666
2001-10-03	1.067857	1.097143	1.059286	1.07	170760800	0.959184
2001-10-04	1.096429	1.160714	1.070714	1.134286	100280600	1.016812
2001-10-05	1.1	1.153571	1.070714	1.152857	85671600	1.03346
2001-10-08	1.112143	1.167857	1.107143	1.157143	51996000	1.037302
2001-10-09	1.146429	1.157143	1.116429	1.142857	43506400	1.024495
2001-10-10	1.15	1.203571	1.139286	1.201429	76939800	1.077001
2001-10-11	1.208571	1.267143	1.203571	1.267143	83540800	1.135909
2001-10-12	1.236429	1.291429	1.204286	1.286429	71953000	1.153197
2001-10-15	1.282143	1.312857	1.282143	1.285	79688000	1.151917
2001-10-16	1.292143	1.3	1.269286	1.286429	50737400	1.153197
2001-10-17	1.31	1.315	1.211429	1.213571	71384600	1.087886
2001-10-18	1.235	1.302143	1.235	1.285714	153143200	1.152557
2001-10-19	1.281429	1.314286	1.277143	1.307143	41697600	1.171767
2001-10-22	1.300714	1.362143	1.292143	1.358571	97984600	1.217869
2001-10-23	1.365714	1.387143	1.276429	1.295714	171245200	1.161521
2001-10-24	1.29	1.363571	1.267857	1.353571	93606800	1.213387
2001-10-25	1.317143	1.375	1.297143	1.370714	63737800	1.228754
2001-10-26	1.347143	1.375	1.33	1.333571	69741000	1.195458
2001-10-29	1.326429	1.333571	1.257143	1.259286	59795400	1.128866
2001-10-30	1.241429	1.285714	1.218571	1.257143	69190800	1.126945
2001-10-31	1.266429	1.314286	1.245714	1.254286	68437600	1.124383
2001-11-01	1.260714	1.341429	1.232143	1.327857	78248800	1.190336
2001-11-02	1.322857	1.347143	1.297143	1.326429	49301000	1.189055
2001-11-05	1.345714	1.375	1.329286	1.362143	58948400	1.22107
2001-11-06	1.354286	1.401429	1.323571	1.397857	79004800	1.253086
2001-11-07	1.39	1.437857	1.380714	1.399286	95747400	1.254367
2001-11-08	1.402143	1.420714	1.326429	1.336429	85535800	1.198019
2001-11-09	1.328571	1.375	1.325	1.336429	33573400	1.198019
2001-11-12	1.332857	1.369286	1.282857	1.339286	50374800	1.200581
2001-11-13	1.362857	1.385	1.336429	1.383571	56168000	1.24028
2001-11-14	1.399286	1.421429	1.367857	1.400714	55287400	1.255647
2001-11-15	1.389286	1.421429	1.373571	1.389286	53257400	1.245402
2001-11-16	1.376429	1.377857	1.314286	1.355	57666000	1.214667
2001-11-19	1.357143	1.432143	1.354286	1.428571	83147400	1.280619
2001-11-20	1.415714	1.442857	1.392857	1.395	69146000	1.250525
2001-11-21	1.400714	1.414286	1.375714	1.405714	50395800	1.260129
2001-11-23	1.407857	1.425	1.397857	1.417143	15001000	1.270374
2001-11-26	1.424286	1.539286	1.42	1.526429	115172400	1.368341
2001-11-27	1.514286	1.537143	1.464286	1.5	67138400	1.34465
2001-11-28	1.489286	1.515	1.457857	1.466429	62652800	1.314556
2001-11-29	1.471429	1.478571	1.442143	1.458571	50691200	1.307512
2001-11-30	1.462143	1.531429	1.446429	1.521429	75978000	1.36386
2001-12-03	1.504286	1.52	1.471429	1.503571	45291400	1.347852
2001-12-04	1.503571	1.611429	1.48	1.6	95104800	1.434294
2001-12-05	1.597143	1.716429	1.583571	1.697143	142144800	1.521376
2001-12-06	1.677143	1.678571	1.581429	1.627143	84733600	1.458626
2001-12-07	1.604286	1.622143	1.571429	1.61	50878800	1.443258
2001-12-10	1.592143	1.642143	1.587857	1.61	42502600	1.443258
2001-12-11	1.619286	1.632143	1.546429	1.555714	51368800	1.394594
2001-12-12	1.562143	1.565714	1.517857	1.535	48115200	1.376025
2001-12-13	1.535	1.539286	1.464286	1.5	49460600	1.34465
2001-12-14	1.480714	1.487857	1.435	1.456429	47471200	1.305591
2001-12-17	1.457143	1.5	1.442143	1.472857	43428000	1.320318
2001-12-18	1.492143	1.523571	1.444286	1.500714	58809800	1.34529
2001-12-19	1.47	1.548571	1.462143	1.544286	72489200	1.384349
2001-12-20	1.528571	1.533571	1.472857	1.476429	55216000	1.32352
2001-12-21	1.500714	1.538571	1.485714	1.5	64083600	1.34465
2001-12-24	1.492857	1.532143	1.492857	1.525714	12657400	1.367701
2001-12-26	1.525	1.592857	1.51	1.535	36600200	1.376025
2001-12-27	1.541429	1.589286	1.541429	1.576429	47877200	1.413163
2001-12-28	1.569286	1.642857	1.568571	1.602143	74781000	1.436214
2001-12-31	1.607857	1.618571	1.559286	1.564286	34445600	1.402278
2002-01-02	1.575	1.664286	1.568571	1.664286	132374200	1.491922
2002-01-03	1.642857	1.696429	1.626429	1.684286	153001800	1.50985
2002-01-04	1.667143	1.710714	1.642143	1.692143	102494000	1.516894
2002-01-07	1.694286	1.714286	1.625	1.635714	111146000	1.466309
2002-01-08	1.625	1.646429	1.604286	1.615	112509600	1.44774
2002-01-09	1.628571	1.637857	1.52	1.546429	81958800	1.38627
2002-01-10	1.515714	1.532857	1.446429	1.516429	113184400	1.359377
2002-01-11	1.527857	1.56	1.471429	1.503571	87200400	1.347852
2002-01-14	1.500714	1.528571	1.492857	1.510714	103999000	1.354255
2002-01-15	1.522857	1.554286	1.515	1.55	72580200	1.389472
2002-01-16	1.529286	1.529286	1.464286	1.484286	141723400	1.330563
2002-01-17	1.568571	1.624286	1.562143	1.605714	165144000	1.439416
2002-01-18	1.571429	1.614286	1.568571	1.583571	84702800	1.419567
2002-01-22	1.590714	1.597857	1.558571	1.558571	81828600	1.397156
2002-01-23	1.557143	1.645714	1.542143	1.644286	110819800	1.473993
2002-01-24	1.636429	1.679286	1.635714	1.657857	86000600	1.486158
2002-01-25	1.635	1.672857	1.618571	1.660714	46478600	1.48872
2002-01-28	1.671429	1.682143	1.622857	1.662143	46611600	1.49
2002-01-29	1.658571	1.681429	1.632143	1.647857	60081000	1.477195
2002-01-30	1.647857	1.724286	1.638571	1.720714	117894000	1.542506
2002-01-31	1.725714	1.766429	1.722143	1.765714	117111400	1.582845
2002-02-01	1.738571	1.782857	1.738571	1.743571	99576400	1.562996
2002-02-04	1.737143	1.822857	1.728571	1.810714	130593400	1.623185
2002-02-05	1.792143	1.855714	1.791429	1.817857	114221800	1.629588
2002-02-06	1.828571	1.855714	1.725	1.762143	149394000	1.579644
2002-02-07	1.760714	1.806429	1.72	1.735714	86958200	1.555952
2002-02-08	1.742857	1.76	1.669286	1.716429	88832800	1.538664
2002-02-11	1.709286	1.785714	1.695714	1.784286	99650600	1.599493
2002-02-12	1.761429	1.788571	1.746429	1.765	56070000	1.582205
2002-02-13	1.766429	1.802857	1.760714	1.786429	78218000	1.601414
2002-02-14	1.789286	1.802143	1.741429	1.757143	65042600	1.575162
2002-02-15	1.752143	1.784286	1.703571	1.707143	65046800	1.53034
2002-02-19	1.697143	1.705	1.605714	1.615714	97564600	1.44838
2002-02-20	1.626429	1.657143	1.596429	1.652143	71360800	1.481036
2002-02-21	1.637143	1.642857	1.532143	1.535714	111687800	1.376666
2002-02-22	1.547143	1.639286	1.535714	1.624286	101619000	1.456064
2002-02-25	1.632143	1.765714	1.597143	1.700714	106712200	1.524577
2002-02-26	1.707857	1.740714	1.660714	1.690714	65032800	1.515613
2002-02-27	1.71	1.732143	1.495714	1.568571	257539800	1.40612
2002-02-28	1.582143	1.613571	1.525	1.55	114234400	1.389472
2002-03-01	1.566429	1.678571	1.558571	1.675	87248000	1.501526
2002-03-04	1.661429	1.755714	1.625714	1.735	87064600	1.555312
2002-03-05	1.725	1.745	1.671429	1.680714	68675600	1.506648
2002-03-06	1.677143	1.738571	1.637857	1.719286	56551600	1.541225
2002-03-07	1.718571	1.752143	1.686429	1.741429	64562400	1.561075
2002-03-08	1.767143	1.792143	1.735714	1.761429	67443600	1.579003
2002-03-11	1.757143	1.795714	1.721429	1.79	65696400	1.604616
2002-03-12	1.750714	1.767143	1.721429	1.765714	63513800	1.582845
2002-03-13	1.740714	1.775	1.725	1.749286	50191400	1.568118
2002-03-14	1.735714	1.757143	1.705	1.745	54324200	1.564277
2002-03-15	1.747143	1.782857	1.732143	1.782143	60225200	1.597573
2002-03-18	1.782143	1.789286	1.737143	1.767143	76139000	1.584126
2002-03-19	1.763571	1.807143	1.735714	1.775	60586400	1.591169
2002-03-20	1.761429	1.795714	1.75	1.78	73579800	1.595652
2002-03-21	1.704286	1.735714	1.661429	1.733571	154088200	1.554031
2002-03-22	1.73	1.754286	1.705	1.720714	50548400	1.542506
2002-03-25	1.719286	1.720714	1.66	1.667857	65707600	1.495123
2002-03-26	1.657143	1.688571	1.642857	1.675714	64460200	1.502166
2002-03-27	1.667857	1.694286	1.661429	1.676429	31925600	1.502807
2002-03-28	1.692857	1.705714	1.675714	1.690714	27113800	1.515613
2002-04-01	1.67	1.764286	1.662857	1.747143	49761600	1.566198
2002-04-02	1.714286	1.735714	1.705	1.719286	50948800	1.541225
2002-04-03	1.717857	1.749286	1.685714	1.696429	53632600	1.520736
2002-04-04	1.690714	1.789286	1.690714	1.778571	84624400	1.594371
2002-04-05	1.782143	1.799286	1.721429	1.767143	69587000	1.584126
2002-04-08	1.725714	1.762857	1.698571	1.754286	65378600	1.572601
2002-04-09	1.756429	1.785714	1.715	1.721429	47882800	1.543146
2002-04-10	1.729286	1.782143	1.715	1.761429	56245000	1.579003
2002-04-11	1.787857	1.8	1.767857	1.775714	101813600	1.59181
2002-04-12	1.786429	1.797857	1.755	1.79	80060400	1.604616
2002-04-15	1.79	1.796429	1.771429	1.785714	74842600	1.600774
2002-04-16	1.796429	1.856429	1.794286	1.838571	153644400	1.648157
2002-04-17	1.852143	1.869286	1.812857	1.865	99062600	1.671849
2002-04-18	1.821429	1.822857	1.777143	1.815	100427600	1.627027
2002-04-19	1.820714	1.820714	1.780714	1.784286	93851800	1.599493
2002-04-22	1.774286	1.780714	1.730714	1.752143	67356800	1.57068
2002-04-23	1.752857	1.77	1.720714	1.732143	58367400	1.552751
2002-04-24	1.735714	1.75	1.691429	1.697857	35112000	1.522016
2002-04-25	1.682857	1.738571	1.682143	1.722857	48550600	1.544427
2002-04-26	1.734286	1.740714	1.642857	1.643571	76245400	1.473353
2002-04-29	1.654286	1.718571	1.649286	1.711429	68072200	1.534182
2002-04-30	1.706429	1.741429	1.696429	1.733571	70240800	1.554031
2002-05-01	1.735	1.735	1.668571	1.712857	53676000	1.535463
2002-05-02	1.700714	1.738571	1.685714	1.692143	59836000	1.516894
2002-05-03	1.683571	1.715714	1.673571	1.679286	57695400	1.505368
2002-05-06	1.667857	1.678571	1.604286	1.617857	62416200	1.450301
2002-05-07	1.638571	1.639286	1.581429	1.605	60687200	1.438776
2002-05-08	1.657143	1.751429	1.645714	1.740714	109170600	1.560435
2002-05-09	1.732143	1.739286	1.7	1.727857	56154000	1.548909
2002-05-10	1.735	1.735	1.641429	1.665714	58849000	1.493202
2002-05-13	1.68	1.720714	1.638571	1.71	66402000	1.532901
2002-05-14	1.746429	1.834286	1.73	1.829286	131626600	1.639833
2002-05-15	1.812143	1.855714	1.774286	1.805714	83956600	1.618703
2002-05-16	1.79	1.817857	1.767857	1.800714	56763000	1.61422
2002-05-17	1.820714	1.841429	1.757857	1.786429	59123400	1.601414
2002-05-20	1.755	1.780714	1.752143	1.767143	67478600	1.584126
2002-05-21	1.773571	1.785714	1.671429	1.675714	70247800	1.502166
2002-05-22	1.669286	1.740714	1.665714	1.737143	72718800	1.557233
2002-05-23	1.746429	1.802857	1.719286	1.798571	92349600	1.6123
2002-05-24	1.785	1.785	1.711429	1.725	41543600	1.546347
2002-05-28	1.692143	1.728571	1.673571	1.712857	37429000	1.535463
2002-05-29	1.708571	1.745714	1.675	1.712857	55448400	1.535463
2002-05-30	1.697857	1.741429	1.679286	1.728571	49093800	1.549549
2002-05-31	1.720714	1.732143	1.662857	1.664286	91373800	1.491922
2002-06-03	1.670714	1.675	1.612857	1.636429	58777600	1.466949
2002-06-04	1.634286	1.645714	1.584286	1.627143	86955400	1.458626
2002-06-05	1.630714	1.630714	1.596429	1.622857	69270600	1.454783
2002-06-06	1.64	1.659286	1.574286	1.582857	64999200	1.418926
2002-06-07	1.554286	1.567143	1.495	1.528571	153094200	1.370263
2002-06-10	1.534286	1.56	1.524286	1.534286	69393800	1.375385
2002-06-11	1.545714	1.55	1.457857	1.461429	87374000	1.310074
2002-06-12	1.457857	1.482143	1.424286	1.435	132179600	1.286382
2002-06-13	1.43	1.432143	1.384286	1.395714	88020800	1.251165
2002-06-14	1.374286	1.454286	1.293571	1.435714	106225000	1.287022
2002-06-17	1.445714	1.473571	1.417857	1.467143	81152400	1.315196
2002-06-18	1.458571	1.470714	1.427143	1.439286	88340000	1.290224
2002-06-19	1.240714	1.257143	1.205714	1.222857	427366800	1.09621
2002-06-20	1.226429	1.257143	1.203571	1.222143	99159200	1.09557
2002-06-21	1.212143	1.249286	1.199286	1.203571	111294400	1.078922
2002-06-24	1.197857	1.266429	1.192857	1.233571	107983400	1.105814
2002-06-25	1.242857	1.262857	1.204286	1.224286	75300400	1.097491
2002-06-26	1.2	1.235	1.141429	1.182143	139738200	1.059712
2002-06-27	1.199286	1.233571	1.172857	1.218571	62914600	1.092368
2002-06-28	1.221429	1.272857	1.214286	1.265714	67464600	1.134629
2002-07-01	1.265	1.277143	1.217857	1.218571	55672400	1.092368
2002-07-02	1.216429	1.225714	1.202143	1.21	76297200	1.084684
2002-07-03	1.200714	1.262857	1.196429	1.253571	49757400	1.123743
2002-07-05	1.265	1.339286	1.265	1.338571	40412400	1.19994
2002-07-08	1.322857	1.329286	1.262857	1.286429	52801000	1.153197
2002-07-09	1.292143	1.306429	1.247143	1.252143	56687400	1.122463
2002-07-10	1.265	1.297857	1.232143	1.237143	51720200	1.109016
2002-07-11	1.232857	1.310714	1.212143	1.307143	93419200	1.171767
2002-07-12	1.325	1.342143	1.232857	1.250714	110873000	1.121182
2002-07-15	1.245	1.328571	1.200714	1.302143	73998400	1.167284
2002-07-16	1.296429	1.326429	1.257857	1.275714	111692000	1.143593
2002-07-17	1.152143	1.157143	1.085	1.116429	303871400	1.000804
2002-07-18	1.107143	1.111429	1.053571	1.070714	139865600	0.959824
2002-07-19	1.05	1.083571	1.037857	1.068571	96301800	0.957903
2002-07-22	1.053571	1.085	1.043571	1.065714	107724400	0.955342
2002-07-23	1.064286	1.080714	1.031429	1.033571	99972600	0.926528
2002-07-24	1.023571	1.087143	1.017857	1.085714	101648400	0.973271
2002-07-25	1.066429	1.067857	1.000714	1.025714	119838600	0.919484
2002-07-26	1.032857	1.037857	0.985714	1.024286	51926000	0.918204
2002-07-29	1.034286	1.078571	1.026429	1.072857	68740000	0.961745
2002-07-30	1.060714	1.107857	1.04	1.102143	88709600	0.987998
2002-07-31	1.1	1.101429	1.064286	1.09	77674800	0.977112
2002-08-01	1.079286	1.101429	1.052143	1.057143	57239000	0.947658
2002-08-02	1.052857	1.071429	1.017857	1.032143	44765000	0.925247
2002-08-05	1.036429	1.05	0.997857	0.999286	51006200	0.895793
2002-08-06	1.015	1.087857	1.005714	1.052857	68013400	0.943817
2002-08-07	1.077857	1.097143	1.025	1.073571	83368600	0.962385
2002-08-08	1.055	1.098571	1.055	1.092857	56837200	0.979674
2002-08-09	1.089286	1.089286	1.053571	1.071429	51429000	0.960464
2002-08-12	1.064286	1.072857	1.049286	1.070714	44941400	0.959824
2002-08-13	1.064286	1.086429	1.039286	1.042143	67467400	0.934212
2002-08-14	1.047857	1.096429	1.038571	1.083571	99771000	0.971349
2002-08-15	1.089286	1.125	1.072143	1.115	80519600	0.999523
2002-08-16	1.103571	1.15	1.091429	1.129286	61306000	1.01233
2002-08-19	1.127143	1.160714	1.122857	1.141429	54139400	1.023215
2002-08-20	1.140714	1.149286	1.109286	1.136429	46656400	1.018733
2002-08-21	1.143571	1.16	1.103571	1.151429	50607200	1.032179
2002-08-22	1.157143	1.160714	1.118571	1.140714	64577800	1.022575
2002-08-23	1.135714	1.137857	1.103571	1.123571	40811400	1.007207
2002-08-26	1.139286	1.139286	1.082857	1.109286	47492200	0.994401
2002-08-27	1.122143	1.124286	1.050714	1.060714	65557800	0.95086
2002-08-28	1.057143	1.08	1.046429	1.05	61993400	0.941255
2002-08-29	1.046429	1.077143	1.036429	1.05	41042400	0.941255
2002-08-30	1.052143	1.081429	1.041429	1.053571	48379800	0.944457
2002-09-03	1.035	1.039286	1.003571	1.003571	69234200	0.899635
2002-09-04	1.014286	1.055714	1.012143	1.034286	105165200	0.927168
2002-09-05	1.015714	1.025714	1.003571	1.012857	56544600	0.907959
2002-09-06	1.036429	1.046429	1.016429	1.027143	45397800	0.920765
2002-09-09	1.02	1.037857	1.010714	1.026429	39561200	0.920125
2002-09-10	1.029286	1.035	1.008571	1.023571	62367200	0.917564
2002-09-11	1.024286	1.042857	1.010714	1.020714	50603000	0.915002
2002-09-12	1.014286	1.036429	1.008571	1.01	67457600	0.905398
2002-09-13	1.009286	1.024286	1.003571	1.012143	70737800	0.907319
2002-09-16	1.01	1.043571	1.008571	1.035714	71660400	0.928449
2002-09-17	1.040714	1.073571	1.040714	1.057143	106999200	0.947658
2002-09-18	1.049286	1.077857	1.037143	1.072857	82160400	0.961745
2002-09-19	1.053571	1.057143	1.034286	1.041429	51486400	0.933571
2002-09-20	1.044286	1.067143	1.037143	1.062143	88197200	0.95214
2002-09-23	1.054286	1.068571	1.032143	1.060714	65927400	0.95086
2002-09-24	1.028571	1.058571	1.028571	1.045714	62665400	0.937413
2002-09-25	1.049286	1.083571	1.046429	1.066429	63670600	0.955982
2002-09-26	1.078571	1.085	1.039286	1.05	52161200	0.941255
2002-09-27	1.035	1.060714	1.034286	1.051429	51538200	0.942536
2002-09-30	1.028571	1.040714	1.01	1.035714	59424400	0.928449
2002-10-01	1.042143	1.042857	1	1.036429	85605800	0.929089
2002-10-02	1.023571	1.045	1.007143	1.012143	57337000	0.907319
2002-10-03	1.012857	1.042857	1.004286	1.021429	54474000	0.915643
2002-10-04	1.025714	1.028571	0.999286	1.002143	47706400	0.898354
2002-10-07	0.997857	1.015	0.982857	0.983571	61174400	0.881706
2002-10-08	0.992857	0.997143	0.954286	0.977143	113411200	0.875944
2002-10-09	0.967143	0.989286	0.957857	0.970714	89171600	0.870181
2002-10-10	0.973571	1.015714	0.97	1.007857	80393600	0.903477
2002-10-11	1.017857	1.055714	1.007143	1.036429	73669400	0.929089
2002-10-14	1.039286	1.07	1.031429	1.055	48601000	0.945737
2002-10-15	1.087143	1.089286	1.055714	1.082857	101379600	0.970709
2002-10-16	1.061429	1.080714	0.992857	1.04	76906200	0.932291
2002-10-17	1.015	1.027143	0.998571	1.007857	117324200	0.903477
2002-10-18	1	1.025	0.995	1.024286	72074800	0.918204
2002-10-21	1.018571	1.045	1	1.04	59630200	0.932291
2002-10-22	1.033571	1.062857	1.018571	1.05	54537000	0.941255
2002-10-23	1.045	1.07	1.035714	1.062857	52259200	0.952781
2002-10-24	1.072857	1.086429	1.039286	1.049286	43687000	0.940615
2002-10-25	1.049286	1.103571	1.042143	1.101429	69767600	0.987358
2002-10-28	1.110714	1.139286	1.089286	1.115	87325000	0.999523
2002-10-29	1.112143	1.134286	1.068571	1.102857	64794800	0.988638
2002-10-30	1.106429	1.169286	1.105714	1.141429	67669000	1.023215
2002-10-31	1.142143	1.174286	1.137143	1.147857	73959200	1.028977
2002-11-01	1.138571	1.178571	1.135	1.168571	47457200	1.047547
2002-11-04	1.178571	1.241429	1.167857	1.206429	94204600	1.081483
2002-11-05	1.196429	1.211429	1.167857	1.207143	52673600	1.082123
2002-11-06	1.22	1.237143	1.192857	1.23	54097400	1.102613
2002-11-07	1.21	1.221429	1.129286	1.142857	84044800	1.024495
2002-11-08	1.143571	1.157143	1.108571	1.131429	47516000	1.01425
2002-11-11	1.124286	1.135	1.08	1.082857	38243800	0.970709
2002-11-12	1.094286	1.145714	1.091429	1.117143	55948200	1.001444
2002-11-13	1.107143	1.147857	1.091429	1.113571	57934800	0.998243
2002-11-14	1.135714	1.172143	1.127143	1.164286	35428400	1.043705
2002-11-15	1.159286	1.16	1.125714	1.139286	40248600	1.021294
2002-11-18	1.156429	1.157143	1.108571	1.117857	41144600	1.002084
2002-11-19	1.110714	1.125	1.072143	1.090714	52738000	0.977753
2002-11-20	1.092857	1.121429	1.089286	1.109286	52185000	0.994401
2002-11-21	1.135714	1.174286	1.125	1.167857	104620600	1.046906
2002-11-22	1.149286	1.164286	1.135714	1.143571	56964600	1.025136
2002-11-25	1.145	1.152857	1.122143	1.140714	49856800	1.022575
2002-11-26	1.132143	1.135714	1.090714	1.100714	60065600	0.986718
2002-11-27	1.114286	1.132857	1.103571	1.122857	71699600	1.006567
2002-11-29	1.127857	1.134286	1.100714	1.107143	35858200	0.99248
2002-12-02	1.135714	1.15	1.072143	1.084286	99685600	0.97199
2002-12-03	1.085714	1.095714	1.078571	1.082857	56967400	0.970709
2002-12-04	1.084286	1.085	1.035714	1.069286	81439400	0.958543
2002-12-05	1.073571	1.077143	1.037857	1.045	60849600	0.936773
2002-12-06	1.046429	1.085	1.037143	1.067857	61339600	0.957263
2002-12-09	1.067143	1.067857	1.047857	1.053571	59021200	0.944457
2002-12-10	1.053571	1.103571	1.052143	1.091429	77152600	0.978393
2002-12-11	1.092857	1.106429	1.077143	1.106429	63375200	0.99184
2002-12-12	1.107857	1.110714	1.072143	1.085	37335200	0.97263
2002-12-13	1.081429	1.082143	1.046429	1.056429	41195000	0.947018
2002-12-16	1.057857	1.078571	1.043571	1.060714	62906200	0.95086
2002-12-17	1.060714	1.085	1.047143	1.077143	55665400	0.965587
2002-12-18	1.057143	1.061429	1.035714	1.040714	37675400	0.932931
2002-12-19	1.037857	1.065714	1.007143	1.014286	86879800	0.90924
2002-12-20	1.020714	1.04	0.984286	1.01	79524200	0.905398
2002-12-23	1.011429	1.039286	1.008571	1.035	31456600	0.927809
2002-12-24	1.031429	1.033571	1.021429	1.025714	9835000	0.919484
2002-12-26	1.03	1.057857	1.02	1.028571	21355600	0.922046
2002-12-27	1.022143	1.027143	1.000714	1.004286	20008800	0.900275
2002-12-30	1.005714	1.010714	0.988571	1.005	38760400	0.900916
2002-12-31	1	1.025714	0.996429	1.023571	50181600	0.917564
2003-01-02	1.025714	1.065714	1.025	1.057143	45357200	0.947658
2003-01-03	1.057143	1.066429	1.042143	1.064286	36863400	0.954061
2003-01-06	1.073571	1.098571	1.062857	1.064286	97633200	0.954061
2003-01-07	1.056429	1.071429	1.033571	1.060714	85586200	0.95086
2003-01-08	1.041429	1.050714	1.031429	1.039286	57411200	0.931651
2003-01-09	1.044286	1.065714	1.035714	1.048571	53813200	0.939975
2003-01-10	1.041429	1.058571	1.035	1.051429	43775200	0.942536
2003-01-13	1.064286	1.064286	1.025714	1.045	44735600	0.936773
2003-01-14	1.049286	1.058571	1.035	1.043571	46715200	0.935492
2003-01-15	1.042143	1.05	1.018571	1.030714	92782200	0.923967
2003-01-16	1.015	1.054286	1.015	1.044286	139767600	0.936133
2003-01-17	1.04	1.04	1.005714	1.007143	66690400	0.902837
2003-01-21	1.015	1.029286	1	1.001429	63364000	0.897714
2003-01-22	0.998571	1.010714	0.985714	0.991429	53785200	0.88875
2003-01-23	1.003571	1.025714	0.996429	1.012143	57064000	0.907319
2003-01-24	1.017143	1.017143	0.968571	0.985714	76367200	0.883627
2003-01-27	0.977143	1.035714	0.975	1.009286	97851600	0.904757
2003-01-28	1.017143	1.049286	1.011429	1.041429	71563800	0.933571
2003-01-29	1.039286	1.078571	1.021429	1.066429	93261000	0.955982
2003-01-30	1.07	1.076429	1.020714	1.022857	101764600	0.916923
2003-01-31	1.013571	1.039286	1.003571	1.025714	85306200	0.919484
2003-02-03	1.029286	1.065	1.025	1.047143	66196200	0.938694
2003-02-04	1.032143	1.046429	1.022143	1.042857	79353400	0.934852
2003-02-05	1.050714	1.066429	1.031429	1.032143	55403600	0.925247
2003-02-06	1.025714	1.042143	1.015714	1.030714	44787400	0.923967
2003-02-07	1.039286	1.042857	1.005	1.010714	67425400	0.906038
2003-02-10	1.018571	1.040714	1.004286	1.025	41972000	0.918844
2003-02-11	1.035714	1.045	1.014286	1.025	41195000	0.918844
2003-02-12	1.019286	1.042857	1.019286	1.027857	57171800	0.921406
2003-02-13	1.029286	1.045714	1.017143	1.038571	52123400	0.93101
2003-02-14	1.043571	1.051429	1.025	1.047857	60824400	0.939334
2003-02-18	1.053571	1.092857	1.051429	1.090714	72724400	0.977753
2003-02-19	1.076429	1.082143	1.048571	1.060714	60092200	0.95086
2003-02-20	1.060714	1.068571	1.050714	1.055	56088200	0.945737
2003-02-21	1.058571	1.075714	1.046429	1.071429	39361000	0.960464
2003-02-24	1.061429	1.073571	0.985714	1.052857	45063200	0.943817
2003-02-25	1.048571	1.077143	1.041429	1.072857	47160400	0.961745
2003-02-26	1.070714	1.072857	1.034286	1.035714	54273800	0.928449
2003-02-27	1.040714	1.071429	1.036429	1.061429	38585400	0.9515
2003-02-28	1.061429	1.077857	1.055	1.072143	48774600	0.961105
2003-03-03	1.072143	1.082857	1.039286	1.046429	50940400	0.938054
2003-03-04	1.052857	1.057857	1.031429	1.04	31603600	0.932291
2003-03-05	1.043571	1.057143	1.037143	1.044286	31670800	0.936133
2003-03-06	1.041429	1.042857	1.028571	1.04	24964800	0.932291
2003-03-07	1.033571	1.050714	1.022143	1.037857	50246000	0.93037
2003-03-10	1.036429	1.047857	1.021429	1.026429	33643400	0.920125
2003-03-11	1.025714	1.035	1.008571	1.016429	40297600	0.911161
2003-03-12	1.012143	1.027857	1.004286	1.015714	55640200	0.91052
2003-03-13	1.033571	1.057143	1.012143	1.051429	83861400	0.942536
2003-03-14	1.048571	1.072143	1.045714	1.055714	38274600	0.946378
2003-03-17	1.063571	1.076429	1.050714	1.072143	99978200	0.961105
2003-03-18	1.071429	1.077857	1.058571	1.071429	57495200	0.960464
2003-03-19	1.076429	1.082143	1.056429	1.067857	35329000	0.957263
2003-03-20	1.066429	1.070714	1.042857	1.065	40794600	0.954702
2003-03-21	1.077857	1.082143	1.058571	1.071429	74487000	0.960464
2003-03-24	1.047857	1.057143	1.025	1.026429	40275200	0.920125
2003-03-25	1.029286	1.059286	1.026429	1.039286	41924400	0.931651
2003-03-26	1.039286	1.04	1.021429	1.029286	44585800	0.922686
2003-03-27	1.022857	1.05	1.022857	1.035	30598400	0.927809
2003-03-28	1.028571	1.044286	1.026429	1.040714	36325800	0.932931
2003-03-31	1.023571	1.037857	1.002857	1.01	64164800	0.905398
2003-04-01	1.014286	1.022143	1.005	1.011429	38585400	0.906679
2003-04-02	1.025714	1.049286	1.019286	1.042857	42842800	0.934852
2003-04-03	1.04	1.05	1.025	1.032857	36428000	0.925888
2003-04-04	1.037143	1.047857	1.027857	1.029286	36505000	0.922686
2003-04-07	1.060714	1.067857	1.029286	1.035	49215600	0.927809
2003-04-08	1.036429	1.046429	1.025714	1.032143	32233600	0.925247
2003-04-09	1.037143	1.044286	1.01	1.013571	36681400	0.908599
2003-04-10	1.014286	1.027857	1.014286	1.026429	26775000	0.920125
2003-04-11	1.003571	1.031429	0.923571	0.942857	348177200	0.845209
2003-04-14	0.979286	0.982143	0.964286	0.97	125739600	0.869541
2003-04-15	0.970714	0.971429	0.95	0.956429	75992000	0.857374
2003-04-16	0.927857	0.976429	0.922857	0.945714	254044000	0.84777
2003-04-17	0.942857	0.946429	0.908571	0.937143	154064400	0.840086
2003-04-21	0.937857	0.942143	0.927143	0.938571	38080000	0.841367
2003-04-22	0.941429	0.972857	0.935	0.965	75142200	0.865058
2003-04-23	0.966429	0.973571	0.954286	0.97	52420200	0.869541
2003-04-24	0.965714	0.972143	0.928571	0.96	81277000	0.860576
2003-04-25	0.961429	0.97	0.945	0.953571	51329600	0.854813
2003-04-28	0.962857	0.997143	0.959286	0.99	159199600	0.887469
2003-04-29	0.998571	1.011429	0.97	1.004286	114559200	0.900275
2003-04-30	0.995	1.025	0.989286	1.015714	114543800	0.91052
2003-05-01	1.017857	1.027857	1	1.025714	85689800	0.919484
2003-05-02	1.032857	1.042143	1.024286	1.032143	80295600	0.925247
2003-05-05	1.055	1.205714	1.053571	1.149286	388927000	1.030258
2003-05-06	1.151429	1.278571	1.15	1.25	378623000	1.120542
2003-05-07	1.237857	1.302857	1.222143	1.260714	263594800	1.130147
2003-05-08	1.264286	1.290714	1.235	1.285714	171934000	1.152557
2003-05-09	1.309286	1.314286	1.277143	1.307143	147096600	1.171767
2003-05-12	1.296429	1.338571	1.295	1.325714	104843200	1.188415
2003-05-13	1.316429	1.355	1.282143	1.333571	111699000	1.195458
2003-05-14	1.345	1.345714	1.316429	1.325	88872000	1.187774
2003-05-15	1.328571	1.346429	1.319286	1.337857	71248800	1.1993
2003-05-16	1.327857	1.357857	1.305714	1.342857	85407000	1.203782
2003-05-19	1.323571	1.332143	1.29	1.292857	111472200	1.158961
2003-05-20	1.292857	1.297143	1.257143	1.270714	104055000	1.139111
2003-05-21	1.270714	1.292143	1.262143	1.275	76252400	1.142952
2003-05-22	1.277857	1.314286	1.267143	1.302857	44615200	1.167925
2003-05-23	1.300714	1.318571	1.282857	1.308571	51679600	1.173047
2003-05-27	1.282857	1.35	1.279286	1.348571	72532600	1.208904
2003-05-28	1.321429	1.332857	1.296429	1.305714	84919800	1.170486
2003-05-29	1.306429	1.321429	1.278571	1.292857	83441400	1.158961
2003-05-30	1.294286	1.298571	1.252143	1.282143	95687200	1.149356
2003-06-02	1.292857	1.306429	1.233571	1.246429	104647200	1.11734
2003-06-03	1.245714	1.262143	1.215714	1.236429	90214600	1.108376
2003-06-04	1.235714	1.270714	1.224286	1.257143	67800600	1.126945
2003-06-05	1.246429	1.267143	1.237857	1.26	51374400	1.129506
2003-06-06	1.267143	1.288571	1.224286	1.225	60347000	1.098131
2003-06-09	1.21	1.217143	1.187857	1.199286	64988000	1.07508
2003-06-10	1.206429	1.235	1.196429	1.227143	44161600	1.100052
2003-06-11	1.225	1.250714	1.200714	1.246429	56278600	1.11734
2003-06-12	1.253571	1.277143	1.246429	1.269286	63147000	1.13783
2003-06-13	1.267857	1.282143	1.223571	1.244286	47811400	1.115419
2003-06-16	1.257143	1.305	1.246429	1.305	59631600	1.169846
2003-06-17	1.315	1.321429	1.285	1.299286	44366000	1.164723
2003-06-18	1.317857	1.391429	1.307857	1.365714	113745800	1.224272
2003-06-19	1.382857	1.400714	1.340714	1.367143	95382000	1.225553
2003-06-20	1.382143	1.398571	1.35	1.371429	89136600	1.229395
2003-06-23	1.378571	1.406429	1.339286	1.361429	76840400	1.22043
2003-06-24	1.390714	1.405	1.337143	1.341429	128595600	1.202501
2003-06-25	1.347143	1.385714	1.336429	1.363571	82453000	1.222351
2003-06-26	1.335714	1.38	1.335714	1.377857	40426400	1.235157
2003-06-27	1.378571	1.379286	1.32	1.337857	91448000	1.1993
2003-06-30	1.334286	1.372143	1.327857	1.361429	55538000	1.22043
2003-07-01	1.347857	1.37	1.322143	1.363571	45248000	1.222351
2003-07-02	1.359286	1.385714	1.358571	1.376429	81324600	1.233877
2003-07-03	1.357143	1.396429	1.355714	1.366429	34442800	1.224912
2003-07-07	1.376429	1.441429	1.366429	1.419286	71568000	1.272295
2003-07-08	1.394286	1.464286	1.392143	1.457143	64184400	1.306231
2003-07-09	1.443571	1.460714	1.420714	1.420714	53411400	1.273576
2003-07-10	1.42	1.424286	1.383571	1.398571	42733600	1.253726
2003-07-11	1.404286	1.428571	1.395	1.417857	34214600	1.271014
2003-07-14	1.429286	1.457143	1.419286	1.421429	47101600	1.274216
2003-07-15	1.43	1.445714	1.387857	1.400714	51661400	1.255647
2003-07-16	1.426429	1.428571	1.384286	1.419286	62732600	1.272295
2003-07-17	1.442143	1.496429	1.437857	1.492857	187803000	1.338247
2003-07-18	1.492857	1.512857	1.457143	1.49	74709600	1.335686
2003-07-21	1.477857	1.485714	1.45	1.472143	45952200	1.319678
2003-07-22	1.490714	1.497143	1.464286	1.485714	49606200	1.331844
2003-07-23	1.496429	1.497143	1.461429	1.485	35758800	1.331203
2003-07-24	1.502857	1.535714	1.455714	1.465	57309000	1.313275
2003-07-25	1.457857	1.540714	1.457143	1.538571	54171600	1.379227
2003-07-28	1.535714	1.535714	1.49	1.499286	42589400	1.34401
2003-07-29	1.499286	1.505714	1.465714	1.48	49280000	1.326722
2003-07-30	1.483571	1.492857	1.440714	1.448571	43398600	1.298548
2003-07-31	1.481429	1.525	1.469286	1.505714	75366200	1.349772
2003-08-01	1.5	1.519286	1.474286	1.480714	37401000	1.327362
2003-08-04	1.466429	1.535714	1.448571	1.515	57528800	1.358097
2003-08-05	1.525	1.528571	1.435714	1.455714	62360200	1.304951
2003-08-06	1.432857	1.440714	1.392857	1.402143	61366200	1.256928
2003-08-07	1.409286	1.435	1.387143	1.423571	43594600	1.276137
2003-08-08	1.436429	1.437857	1.4	1.402857	34414800	1.257568
2003-08-11	1.415714	1.423571	1.393571	1.404286	34307000	1.258849
2003-08-12	1.411429	1.414286	1.39	1.407143	41109600	1.26141
2003-08-13	1.418571	1.452857	1.398571	1.441429	71024800	1.292145
2003-08-14	1.443571	1.452143	1.424286	1.426429	48195000	1.278698
2003-08-15	1.43	1.433571	1.404286	1.407857	31466400	1.262051
2003-08-18	1.418571	1.457857	1.408571	1.452857	48193600	1.30239
2003-08-19	1.455	1.460714	1.428571	1.451429	33422200	1.301109
2003-08-20	1.441429	1.519286	1.438571	1.500714	68303200	1.34529
2003-08-21	1.502143	1.550714	1.496429	1.548571	63831600	1.388191
2003-08-22	1.557857	1.571429	1.474286	1.491429	62566000	1.336967
2003-08-25	1.484286	1.493571	1.463571	1.49	34445600	1.335686
2003-08-26	1.482143	1.505	1.453571	1.503571	41239800	1.347852
2003-08-27	1.493571	1.534286	1.475714	1.534286	56425600	1.375385
2003-08-28	1.523571	1.587143	1.523571	1.585	79906400	1.420847
2003-08-29	1.585714	1.632143	1.575	1.615	65788800	1.44774
2003-09-02	1.618571	1.635714	1.6	1.632143	60533200	1.463107
2003-09-03	1.628571	1.665714	1.625714	1.639286	67207000	1.469511
2003-09-04	1.654286	1.660714	1.626429	1.630714	49945000	1.461827
2003-09-05	1.623571	1.653571	1.600714	1.607143	60033400	1.440696
2003-09-08	1.605714	1.627857	1.605	1.624286	41811000	1.456064
2003-09-09	1.609286	1.619286	1.58	1.597857	45092600	1.432372
2003-09-10	1.589286	1.615	1.579286	1.584286	56222600	1.420207
2003-09-11	1.589286	1.627857	1.578571	1.611429	53421200	1.444538
2003-09-12	1.607857	1.652857	1.593571	1.65	44997400	1.479115
2003-09-15	1.629286	1.635714	1.58	1.586429	56711200	1.422128
2003-09-16	1.586429	1.620714	1.585714	1.597143	67251800	1.431732
2003-09-17	1.597857	1.598571	1.560714	1.58	72349200	1.416365
2003-09-18	1.578571	1.642143	1.567857	1.634286	63226800	1.465028
2003-09-19	1.634286	1.646429	1.602143	1.612857	51489200	1.445819
2003-09-22	1.584286	1.607143	1.565714	1.577143	44955400	1.413804
2003-09-23	1.572857	1.604286	1.562857	1.602143	33112800	1.436214
2003-09-24	1.586429	1.593571	1.505714	1.522857	75321400	1.36514
2003-09-25	1.524286	1.526429	1.446429	1.459286	143595200	1.308153
2003-09-26	1.45	1.55	1.439286	1.477857	86812600	1.3248
2003-09-29	1.535	1.547857	1.475	1.521429	91425600	1.36386
2003-09-30	1.506429	1.515714	1.46	1.48	71356600	1.326722
2003-10-01	1.479286	1.507143	1.442143	1.485	59028200	1.331203
2003-10-02	1.485714	1.485714	1.448571	1.469286	51014600	1.317117
2003-10-03	1.499286	1.561429	1.491429	1.549286	74900000	1.388831
2003-10-06	1.547857	1.595	1.541429	1.592143	67082400	1.42725
2003-10-07	1.575	1.672143	1.565	1.658571	104543600	1.486799
2003-10-08	1.660714	1.681429	1.623571	1.647143	107167200	1.476554
2003-10-09	1.664286	1.690714	1.627857	1.675	86937200	1.501526
2003-10-10	1.678571	1.700714	1.669286	1.691429	43709400	1.516253
2003-10-13	1.695	1.743571	1.694286	1.739286	69966400	1.559154
2003-10-14	1.737143	1.767143	1.727857	1.753571	68854800	1.57196
2003-10-15	1.775	1.786429	1.755714	1.772857	152525800	1.589248
2003-10-16	1.7	1.702857	1.600714	1.660714	243920600	1.48872
2003-10-17	1.67	1.677857	1.602143	1.625	89952800	1.456704
2003-10-20	1.614286	1.667143	1.598571	1.658571	69783000	1.486799
2003-10-21	1.665	1.671429	1.625	1.655714	44115400	1.484238
2003-10-22	1.638571	1.657143	1.62	1.625714	40399800	1.457345
2003-10-23	1.623571	1.653571	1.613571	1.642143	41302800	1.472072
2003-10-24	1.611429	1.632143	1.587857	1.614286	54964000	1.4471
2003-10-27	1.625	1.635	1.606429	1.614286	40503400	1.4471
2003-10-28	1.611429	1.697857	1.6	1.694286	62928600	1.518814
2003-10-29	1.679286	1.707143	1.667143	1.692143	66770200	1.516894
2003-10-30	1.713571	1.714286	1.633571	1.649286	65139200	1.478475
2003-10-31	1.664286	1.667857	1.627143	1.635	54538400	1.465669
2003-11-03	1.630714	1.664286	1.627143	1.653571	75710600	1.482317
2003-11-04	1.647857	1.65	1.613571	1.636429	62308400	1.466949
2003-11-05	1.63	1.652143	1.605	1.645	80617600	1.474633
2003-11-06	1.636429	1.653571	1.617857	1.651429	99268400	1.480396
2003-11-07	1.656429	1.66	1.603571	1.607143	52536400	1.440696
2003-11-10	1.603571	1.617857	1.56	1.564286	58569000	1.402278
2003-11-11	1.564286	1.572857	1.534286	1.538571	53768400	1.379227
2003-11-12	1.534286	1.622857	1.534286	1.595	75000800	1.429811
2003-11-13	1.576429	1.611429	1.565714	1.601429	53193000	1.435574
2003-11-14	1.605714	1.615	1.52	1.532857	59262000	1.374104
2003-11-17	1.525	1.526429	1.496429	1.509286	57064000	1.352974
2003-11-18	1.515	1.524286	1.453571	1.457857	66798200	1.306872
2003-11-19	1.468571	1.475	1.447143	1.458571	86146200	1.307512
2003-11-20	1.435714	1.505714	1.435714	1.455714	59897600	1.304951
2003-11-21	1.452857	1.47	1.417857	1.448571	60459000	1.298548
2003-11-24	1.464286	1.519286	1.460714	1.510714	95456200	1.354255
2003-11-25	1.516429	1.517857	1.472143	1.477143	67163600	1.32416
2003-11-26	1.492143	1.510714	1.446429	1.48	61282200	1.326722
2003-11-28	1.484286	1.505	1.465714	1.493571	19024600	1.338887
2003-12-01	1.502857	1.560714	1.5	1.550714	90384000	1.390112
2003-12-02	1.542857	1.564286	1.529286	1.538571	51324000	1.379227
2003-12-03	1.538571	1.56	1.497143	1.502143	47824000	1.346571
2003-12-04	1.495714	1.512143	1.483571	1.510714	44485000	1.354255
2003-12-05	1.492857	1.510714	1.480714	1.489286	46544400	1.335045
2003-12-08	1.484286	1.505714	1.457857	1.503571	37059400	1.347852
2003-12-09	1.512143	1.517857	1.457143	1.460714	33786200	1.309433
2003-12-10	1.460714	1.472143	1.425714	1.455714	67834200	1.304951
2003-12-11	1.446429	1.524286	1.443571	1.515	45784200	1.358097
2003-12-12	1.522857	1.522857	1.478571	1.492143	48168400	1.337607
2003-12-15	1.535	1.535	1.433571	1.440714	97227200	1.291504
2003-12-16	1.442143	1.463571	1.429286	1.437143	93489200	1.288303
2003-12-17	1.434286	1.437857	1.413571	1.42	68565000	1.272936
2003-12-18	1.421429	1.441429	1.421429	1.431429	82728800	1.28318
2003-12-19	1.442143	1.458571	1.401429	1.407143	113390200	1.26141
2003-12-22	1.403571	1.420714	1.375	1.417857	94266200	1.271014
2003-12-23	1.422857	1.425	1.4	1.415	77124600	1.268453
2003-12-24	1.408571	1.470714	1.403571	1.457857	44368800	1.306872
2003-12-26	1.453571	1.493571	1.452857	1.484286	25923800	1.330563
2003-12-29	1.493571	1.511429	1.49	1.510714	58364600	1.354255
2003-12-30	1.512857	1.535714	1.510714	1.52	51213400	1.362579
2003-12-31	1.525	1.537857	1.512857	1.526429	43612800	1.368341
2004-01-02	1.539286	1.553571	1.512857	1.52	36160600	1.362579
2004-01-05	1.53	1.599286	1.53	1.583571	98754600	1.419567
2004-01-06	1.589286	1.601429	1.550714	1.577857	127337000	1.414444
2004-01-07	1.578571	1.630714	1.566429	1.613571	146718600	1.44646
2004-01-08	1.631429	1.695	1.617857	1.668571	115075800	1.495764
2004-01-09	1.659286	1.723571	1.627857	1.642857	106864800	1.472712
2004-01-12	1.660714	1.714286	1.65	1.695	121886800	1.519455
2004-01-13	1.764286	1.774286	1.704286	1.722857	169754200	1.544427
2004-01-14	1.742857	1.752857	1.698571	1.728571	155010800	1.549549
2004-01-15	1.636429	1.671429	1.607143	1.632143	254552200	1.463107
2004-01-16	1.635	1.645714	1.615	1.622857	93205000	1.454783
2004-01-20	1.619286	1.628571	1.589286	1.623571	78986600	1.455424
2004-01-21	1.621429	1.640714	1.602143	1.615	56665000	1.44774
2004-01-22	1.611429	1.630714	1.584286	1.584286	51251200	1.420207
2004-01-23	1.601429	1.624286	1.589286	1.611429	56792400	1.444538
2004-01-26	1.604286	1.647143	1.602143	1.643571	67817400	1.473353
2004-01-27	1.645714	1.660714	1.628571	1.647857	76767600	1.477195
2004-01-28	1.631429	1.67	1.600714	1.608571	68850600	1.441977
2004-01-29	1.616429	1.628571	1.585	1.62	53174800	1.452222
2004-01-30	1.617857	1.633571	1.601429	1.611429	46324600	1.444538
2004-02-02	1.604286	1.629286	1.577143	1.594286	71857800	1.429171
2004-02-03	1.592857	1.6	1.571429	1.59	45203200	1.425329
2004-02-04	1.571429	1.577857	1.55	1.556429	76388200	1.395235
2004-02-05	1.558571	1.636429	1.557857	1.601429	88211200	1.435574
2004-02-06	1.603571	1.635	1.6	1.622143	48335000	1.454143
2004-02-09	1.615714	1.632857	1.607143	1.619286	47065200	1.451582
2004-02-10	1.615714	1.651429	1.602857	1.641429	63835800	1.471431
2004-02-11	1.649286	1.705	1.646429	1.7	87136000	1.523937
2004-02-12	1.686429	1.713571	1.685714	1.695	45997000	1.519455
2004-02-13	1.703571	1.721429	1.630714	1.642857	78995000	1.472712
2004-02-17	1.65	1.677857	1.65	1.654286	42739200	1.482957
2004-02-18	1.655714	1.674286	1.646429	1.661429	35408800	1.48936
2004-02-19	1.666429	1.688571	1.600714	1.605	80770200	1.438776
2004-02-20	1.607143	1.607857	1.586429	1.6	69400800	1.434294
2004-02-23	1.595714	1.604286	1.563571	1.585	48519800	1.420847
2004-02-24	1.581429	1.624286	1.571429	1.597143	64764000	1.431732
2004-02-25	1.591429	1.635714	1.586429	1.629286	69069000	1.460546
2004-02-26	1.634286	1.655714	1.628571	1.645714	49602000	1.475274
2004-02-27	1.64	1.715714	1.639286	1.708571	117209400	1.531621
2004-03-01	1.721429	1.735714	1.705	1.715714	80420200	1.538024
2004-03-02	1.714286	1.721429	1.697857	1.700714	64171800	1.524577
2004-03-03	1.685714	1.727857	1.685714	1.708571	56282800	1.531621
2004-03-04	1.709286	1.801429	1.707857	1.797143	165055800	1.611019
2004-03-05	1.782143	1.963571	1.778571	1.91	385149800	1.712188
2004-03-08	1.901429	1.913571	1.842857	1.857143	130718000	1.664805
2004-03-09	1.85	1.945	1.839286	1.935714	154590800	1.735239
2004-03-10	1.931429	2.01	1.924286	1.977143	251741000	1.772377
2004-03-11	1.947857	2.002857	1.935	1.939286	148962800	1.738441
2004-03-12	1.951429	1.984286	1.940714	1.968571	82306000	1.764693
2004-03-15	1.930714	1.953571	1.875714	1.889286	120429400	1.693619
2004-03-16	1.896429	1.900714	1.813571	1.844286	151358200	1.65328
2004-03-17	1.854286	1.884286	1.841429	1.870714	102858000	1.676971
2004-03-18	1.852857	1.861429	1.827857	1.833571	80270400	1.643675
2004-03-19	1.825714	1.924286	1.824286	1.847143	102144000	1.655841
2004-03-22	1.812143	1.869286	1.803571	1.847143	104757800	1.655841
2004-03-23	1.848571	1.857143	1.801429	1.806429	96378800	1.619343
2004-03-24	1.805	1.839286	1.805	1.821429	107053800	1.63279
2004-03-25	1.867143	1.922143	1.849286	1.919286	141611400	1.720512
2004-03-26	1.928571	1.954286	1.922143	1.931429	104973400	1.731397
2004-03-29	1.955	1.999286	1.942857	1.993571	87682000	1.787104
2004-03-30	1.981429	1.996429	1.952857	1.994286	89919200	1.787744
2004-03-31	1.994286	1.998571	1.925	1.931429	97693400	1.731397
2004-04-01	1.920714	1.947857	1.901429	1.936429	79583000	1.735879
2004-04-02	1.982143	1.995	1.945	1.964286	68619600	1.760851
2004-04-05	1.962857	2.026428	1.96	2.022857	96418000	1.813357
2004-04-06	1.979286	2.010714	1.959286	1.987857	64498000	1.781982
2004-04-07	1.972143	1.978571	1.922857	1.950714	63779800	1.748686
2004-04-08	1.991429	2	1.942857	1.966429	60229400	1.762772
2004-04-12	1.964286	2.007143	1.963571	2.002857	57635200	1.795429
2004-04-13	1.998571	2.002143	1.917143	1.923571	109099200	1.724354
2004-04-14	1.91	1.933571	1.879286	1.902857	159933200	1.705785
2004-04-15	2.058571	2.112857	2.011429	2.092857	440361600	1.876107
2004-04-16	2.082143	2.093571	2.035714	2.084286	100732800	1.868424
2004-04-19	2.008571	2.053571	1.987857	2.025	178088400	1.815278
2004-04-20	2.015	2.029286	1.968571	1.980714	88629800	1.775579
2004-04-21	1.971429	2.008571	1.955	1.980714	81468800	1.775579
2004-04-22	1.968571	2.012857	1.936429	1.984286	86146200	1.77878
2004-04-23	1.978571	2	1.932143	1.978571	78957200	1.773657
2004-04-26	1.97	1.974286	1.928571	1.937857	57782200	1.73716
2004-04-27	1.945714	1.96	1.906429	1.924286	70966000	1.724994
2004-04-28	1.915714	1.929286	1.881429	1.889286	57792000	1.693619
2004-04-29	1.889286	1.928571	1.855714	1.912143	115197600	1.714109
2004-04-30	1.907857	1.925714	1.820714	1.841429	116625600	1.650718
2004-05-03	1.857143	1.880714	1.838571	1.862143	74408600	1.669287
2004-05-04	1.855	1.896429	1.821429	1.867143	69995800	1.673769
2004-05-05	1.871429	1.910714	1.854286	1.903571	59526600	1.706425
2004-05-06	1.885714	1.910714	1.85	1.898571	65889600	1.701943
2004-05-07	1.896429	1.969286	1.896429	1.905	104759200	1.707706
2004-05-10	1.876429	1.9	1.852857	1.877143	62494600	1.682734
2004-05-11	1.885714	1.942143	1.885714	1.938571	76293000	1.737801
2004-05-12	1.913571	1.952857	1.874286	1.95	61355000	1.748045
2004-05-13	1.935714	1.98	1.921429	1.942143	57463000	1.741002
2004-05-14	1.946429	1.951429	1.889286	1.932857	64450400	1.732678
2004-05-17	1.907143	1.932857	1.882857	1.902857	75111400	1.705785
2004-05-18	1.926429	1.949286	1.914286	1.932857	51515800	1.732678
2004-05-19	1.957143	1.964286	1.887143	1.890714	93898000	1.6949
2004-05-20	1.902143	1.928571	1.890714	1.907857	49074200	1.710267
2004-05-21	1.921429	1.942857	1.909286	1.936429	44973600	1.735879
2004-05-24	1.949286	1.992857	1.936429	1.952857	58900800	1.750607
2004-05-25	1.964286	2.036429	1.949286	2.029286	79994600	1.819119
2004-05-26	2.023571	2.055714	2	2.036429	80542000	1.825523
2004-05-27	2.032857	2.042857	1.987143	2.012143	58993200	1.803752
2004-05-28	2.005714	2.019286	1.985714	2.004286	36429400	1.796709
2004-06-01	1.985	2.014286	1.972143	2.004286	45533600	1.796709
2004-06-02	2.002143	2.083571	1.985714	2.065714	79678200	1.851775
2004-06-03	2.051429	2.070714	2.020714	2.028571	62732600	1.818479
2004-06-04	2.04	2.089286	2.036429	2.055714	99778000	1.842811
2004-06-07	2.074286	2.141428	2.057857	2.129286	73969000	1.908763
2004-06-08	2.142143	2.174286	2.130714	2.167857	103905200	1.94334
2004-06-09	2.149286	2.193571	2.142857	2.157143	87301200	1.933735
2004-06-10	2.157143	2.212143	2.157143	2.195714	64394400	1.968312
2004-06-14	2.189286	2.191429	2.107143	2.151428	60996600	1.928613
2004-06-15	2.181429	2.224286	2.161429	2.192143	111158600	1.965111
2004-06-16	2.19	2.38	2.180714	2.338571	227410400	2.096374
2004-06-17	2.325714	2.366429	2.300714	2.343571	137830000	2.100856
2004-06-18	2.332857	2.386429	2.316429	2.350714	101563000	2.107259
2004-06-21	2.365714	2.392857	2.294286	2.309286	97553400	2.070121
2004-06-22	2.307143	2.363571	2.306429	2.357143	90127800	2.113022
2004-06-23	2.357143	2.416429	2.349286	2.407143	97717200	2.157844
2004-06-24	2.393571	2.407143	2.355714	2.37	63128800	2.124547
2004-06-25	2.362143	2.407143	2.357143	2.407143	80857000	2.157844
2004-06-28	2.441429	2.442143	2.300714	2.320714	130274200	2.080366
2004-06-29	2.290714	2.356429	2.243572	2.321429	147638400	2.081007
2004-06-30	2.325714	2.355	2.277857	2.324286	93261000	2.083568
2004-07-01	2.292857	2.32	2.278571	2.307143	85485400	2.0682
2004-07-02	2.177143	2.227143	2.123571	2.22	227670800	1.990082
2004-07-06	2.233572	2.244286	2.2	2.210714	87245200	1.981758
2004-07-07	2.203571	2.24	2.152143	2.170714	99498000	1.945901
2004-07-08	2.152143	2.191429	2.139286	2.152857	58345000	1.929893
2004-07-09	2.162143	2.178571	2.145	2.145	52215800	1.92285
2004-07-12	2.144286	2.145714	2.066429	2.081429	127905400	1.865862
2004-07-13	2.089286	2.114286	2.072857	2.087143	79044000	1.870985
2004-07-14	2.061429	2.140714	2.052857	2.112857	208950000	1.894036
2004-07-15	2.332857	2.402143	2.293571	2.352143	441931000	2.108539
2004-07-16	2.342857	2.351429	2.294286	2.3	122095400	2.061797
2004-07-19	2.286429	2.301429	2.261429	2.283571	133292600	2.047069
2004-07-20	2.282143	2.3	2.253572	2.3	80936800	2.061797
2004-07-21	2.315714	2.336429	2.238571	2.258571	75314400	2.024659
2004-07-22	2.232143	2.266428	2.218571	2.262857	83529600	2.028501
2004-07-23	2.252143	2.267857	2.177143	2.192857	68392800	1.965751
2004-07-26	2.203571	2.246428	2.198571	2.232857	98483000	2.001608
2004-07-27	2.271429	2.339286	2.255	2.316429	106251600	2.076524
2004-07-28	2.307857	2.315	2.225714	2.305	71262800	2.066279
2004-07-29	2.319286	2.344286	2.295	2.331429	55539400	2.089971
2004-07-30	2.332143	2.357143	2.285714	2.31	60755800	2.070761
2004-08-02	2.227143	2.3	2.223572	2.255714	91273000	2.022098
2004-08-03	2.246428	2.265714	2.225	2.235	52907400	2.003529
2004-08-04	2.227857	2.294286	2.226429	2.270714	69122200	2.035544
2004-08-05	2.272143	2.307143	2.232143	2.242143	61125400	2.009932
2004-08-06	2.207143	2.221429	2.121428	2.127143	123072600	1.906842
2004-08-09	2.132143	2.175	2.129286	2.164286	72711800	1.940138
2004-08-10	2.170714	2.252857	2.167857	2.251429	87759000	2.018256
2004-08-11	2.221429	2.223572	2.161429	2.215	80598000	1.9856
2004-08-12	2.175	2.203571	2.162857	2.169286	56550200	1.94462
2004-08-13	2.185714	2.234286	2.171429	2.202857	82012000	1.974715
2004-08-16	2.214286	2.265714	2.188571	2.198571	108918600	1.970873
2004-08-17	2.184286	2.223572	2.167857	2.205	80754800	1.976636
2004-08-18	2.179286	2.275	2.177857	2.267143	91163800	2.032343
2004-08-19	2.250714	2.275714	2.168571	2.193571	97230000	1.966391
2004-08-20	2.193571	2.213571	2.177857	2.2	79195200	1.972154
2004-08-23	2.204286	2.233572	2.185714	2.22	63665000	1.990082
2004-08-24	2.232857	2.282143	2.227857	2.282143	93534000	2.045789
2004-08-25	2.276428	2.367857	2.266428	2.360714	126404600	2.116223
2004-08-26	2.36	2.512857	2.338571	2.475714	238964600	2.219312
2004-08-27	2.477143	2.482857	2.428571	2.453571	97203400	2.199464
2004-08-30	2.428571	2.48	2.425714	2.437143	54535600	2.184736
2004-08-31	2.433571	2.496428	2.428571	2.463571	94140200	2.208428
2004-09-01	2.45	2.570714	2.442143	2.561429	128931600	2.296151
2004-09-02	2.535714	2.557857	2.487857	2.547143	101581200	2.283344
2004-09-03	2.500714	2.565714	2.500714	2.516428	73367000	2.25581
2004-09-07	2.528571	2.585	2.516428	2.554286	75489400	2.289747
2004-09-08	2.55	2.612143	2.548571	2.596429	85881600	2.327526
2004-09-09	2.578571	2.592857	2.52	2.55	115334800	2.285905
2004-09-10	2.547143	2.587857	2.532857	2.562143	82003600	2.296791
2004-09-13	2.562857	2.576429	2.522857	2.542143	70494200	2.278862
2004-09-14	2.517143	2.539286	2.484286	2.535	63705600	2.272459
2004-09-15	2.525714	2.534286	2.485714	2.514286	58167200	2.25389
2004-09-16	2.514286	2.625714	2.505714	2.596429	125479200	2.327526
2004-09-17	2.610714	2.67	2.6	2.652857	125577200	2.37811
2004-09-20	2.634286	2.712857	2.633571	2.693571	61250000	2.414607
2004-09-21	2.696429	2.776428	2.675714	2.715	96663000	2.433816
2004-09-22	2.721429	2.724286	2.629286	2.637143	100422000	2.364023
2004-09-23	2.645714	2.678571	2.637857	2.662143	99351000	2.386434
2004-09-24	2.675	2.714286	2.653571	2.663571	92372000	2.387715
2004-09-27	2.639286	2.712857	2.630714	2.680714	99379000	2.403082
2004-09-28	2.675714	2.735	2.675	2.717143	88296600	2.435738
2004-09-29	2.709286	2.775714	2.701429	2.762857	68377400	2.476718
2004-09-30	2.785714	2.805	2.746428	2.767857	106253000	2.481199
2004-10-01	2.794286	2.799286	2.755714	2.762143	116351200	2.476077
2004-10-04	2.798571	2.798571	2.767857	2.770714	143521000	2.483761
2004-10-05	2.754286	2.833571	2.742857	2.812143	101540600	2.520899
2004-10-06	2.821429	2.911429	2.819286	2.902857	111575800	2.602219
2004-10-07	2.895714	2.923571	2.818571	2.83	106537200	2.536906
2004-10-08	2.825714	2.840714	2.774286	2.79	89807200	2.50105
2004-10-11	2.771429	2.79	2.728571	2.756428	80967600	2.470955
2004-10-12	2.75	2.755714	2.689286	2.735	115047800	2.451745
2004-10-13	2.776428	2.84	2.767143	2.839286	290752000	2.545231
2004-10-14	3.085	3.267857	3.039286	3.212857	692106800	2.880113
2004-10-15	3.205714	3.257857	3.156429	3.25	257782000	2.913408
2004-10-18	3.192857	3.410714	3.192857	3.410714	300188000	3.057478
2004-10-19	3.435714	3.453571	3.379286	3.387143	200498200	3.036348
2004-10-20	3.37	3.4	3.332143	3.390714	151277000	3.03955
2004-10-21	3.391428	3.437857	3.382857	3.424286	181126400	3.069644
2004-10-22	3.395714	3.405	3.358572	3.386429	120766800	3.035708
2004-10-25	3.371428	3.417143	3.362143	3.396429	98161000	3.044672
2004-10-26	3.389286	3.432143	3.355	3.426429	148590400	3.071565
2004-10-27	3.465	3.615714	3.440714	3.592857	298373600	3.220757
2004-10-28	3.57	3.73	3.535714	3.727857	216066200	3.341776
2004-10-29	3.702857	3.8	3.7	3.742857	202554800	3.355223
2004-11-01	3.75	3.804286	3.717143	3.746428	150512600	3.358424
2004-11-02	3.742857	3.862857	3.742857	3.821429	182497000	3.425656
2004-11-03	3.883571	4.007857	3.856429	3.950714	301043400	3.541553
2004-11-04	3.930714	3.967857	3.883571	3.889286	232156400	3.486487
2004-11-05	3.918571	3.928571	3.717143	3.908571	301261800	3.503774
2004-11-08	3.876429	3.960714	3.847143	3.884286	131730200	3.482004
2004-11-09	3.873571	3.896429	3.812857	3.860714	118941200	3.460873
2004-11-10	3.853571	3.956429	3.850714	3.910714	127169000	3.505695
2004-11-11	3.925	3.959286	3.873571	3.95	101824800	3.540912
2004-11-12	3.929286	3.977857	3.917143	3.964286	98925400	3.553719
2004-11-15	3.942857	3.961429	3.881428	3.945714	94011400	3.53707
2004-11-16	3.94	3.942857	3.891428	3.924286	73775800	3.517861
2004-11-17	3.942143	3.960714	3.872857	3.921429	99437800	3.515299
2004-11-18	3.878572	3.960714	3.877857	3.956429	114787400	3.546674
2004-11-19	3.963571	4.065	3.892857	3.940714	191319800	3.532588
2004-11-22	4.414286	4.571429	4.135714	4.382143	642052600	3.9283
2004-11-23	4.45	4.460714	4.360714	4.376429	227862600	3.923177
2004-11-24	4.406428	4.657143	4.396429	4.575	347697000	4.101182
2004-11-26	4.667857	4.697143	4.595714	4.610714	137536000	4.133199
2004-11-29	4.925	4.969285	4.815	4.888571	428229200	4.382278
2004-11-30	4.913571	4.913571	4.789286	4.789286	257129600	4.293277
2004-12-01	4.842143	4.853571	4.733572	4.842143	200138400	4.340658
2004-12-02	4.723571	4.778572	4.618571	4.657857	246860600	4.17546
2004-12-03	4.609286	4.642857	4.410714	4.477143	309712200	4.013461
2004-12-06	4.589286	4.731429	4.496428	4.698571	311980200	4.211956
2004-12-07	4.709286	4.766428	4.468572	4.492143	264224800	4.026907
2004-12-08	4.505714	4.602143	4.432143	4.52	172975600	4.051879
2004-12-09	4.486429	4.6	4.433571	4.570714	185375400	4.097341
2004-12-10	4.645	4.717857	4.621428	4.653572	193943400	4.171617
2004-12-13	4.687143	4.707143	4.614286	4.636428	98760200	4.156249
2004-12-14	4.671429	4.705714	4.644286	4.663571	103930400	4.180582
2004-12-15	4.66	4.675714	4.618571	4.661428	99590400	4.178659
2004-12-16	4.725	4.821429	4.717857	4.757143	281528800	4.264462
2004-12-17	4.774286	4.788571	4.635714	4.642143	195874000	4.161372
2004-12-20	4.676429	4.714286	4.411428	4.48	292031600	4.016022
2004-12-21	4.54	4.555	4.4	4.549286	266103600	4.078133
2004-12-22	4.547143	4.597143	4.528572	4.553571	141457400	4.081973
2004-12-23	4.553571	4.589286	4.542857	4.572143	61482400	4.098621
2004-12-27	4.628572	4.653572	4.491428	4.511428	139872600	4.044196
2004-12-28	4.521429	4.589286	4.432143	4.584286	152938800	4.109506
2004-12-29	4.557857	4.641428	4.540714	4.602857	112390600	4.126154
2004-12-30	4.629286	4.645	4.587143	4.628572	86335200	4.149207
2004-12-31	4.635	4.642857	4.573571	4.6	69647200	4.123594
2005-01-03	4.627143	4.650714	4.471428	4.520714	172998000	4.05252
2005-01-04	4.556428	4.676429	4.497857	4.567143	274202600	4.094139
2005-01-05	4.604286	4.660714	4.575	4.607143	170108400	4.129996
2005-01-06	4.619286	4.636428	4.523571	4.610714	176388800	4.133199
2005-01-07	4.642857	4.973571	4.625	4.946429	556862600	4.434144
2005-01-10	4.987857	5.05	4.848571	4.925714	431327400	4.415576
2005-01-11	4.875	4.939286	4.581429	4.611429	652906800	4.133839
2005-01-12	4.675	4.707143	4.521429	4.675714	479925600	4.191468
2005-01-13	5.265	5.315714	4.980714	4.985714	791179200	4.469361
2005-01-14	5.017857	5.122857	4.942143	5.014286	442685600	4.494974
2005-01-18	4.989286	5.05	4.839286	5.046429	251615000	4.523787
2005-01-19	5.035	5.104286	4.982143	4.991428	187973800	4.474483
2005-01-20	4.975	5.090714	4.962143	5.032857	228730600	4.511621
2005-01-21	5.093572	5.114286	5	5.035	227833200	4.513542
2005-01-24	5.07	5.127143	5.039286	5.054286	210407400	4.530829
2005-01-25	5.097857	5.202857	5.067143	5.146429	242307800	4.613431
2005-01-26	5.19	5.196429	5.087143	5.160714	184874200	4.626237
2005-01-27	5.154286	5.208571	5.110714	5.188571	124056800	4.65121
2005-01-28	5.187143	5.284286	5.174286	5.284286	200403000	4.73701
2005-01-31	5.327143	5.563571	5.322143	5.492857	420274400	4.923981
2005-02-01	5.503572	5.555	5.47	5.537857	169598800	4.964322
2005-02-02	5.567857	5.707857	5.549286	5.687857	255015600	5.098785
2005-02-03	5.65	5.673572	5.523571	5.557857	182912800	4.98225
2005-02-04	5.562143	5.637857	5.537857	5.631429	140889000	5.048202
2005-02-07	5.637857	5.667857	5.535714	5.638571	131114200	5.054605
2005-02-08	5.647857	5.812857	5.627857	5.778572	222504800	5.180105
2005-02-09	5.788571	5.856429	5.578571	5.624286	297864000	5.041799
2005-02-10	5.622857	5.662857	5.475714	5.597143	273254800	5.017466
2005-02-11	5.704286	5.84	5.638571	5.800714	300263600	5.199955
2005-02-14	5.909286	6.056428	5.860714	6.045	317865800	5.418941
2005-02-15	6.19	6.362857	6.142857	6.315	578054400	5.660978
2005-02-16	6.296429	6.442857	6.239286	6.437857	409810800	5.771111
2005-02-17	6.475	6.491428	6.246428	6.272143	379618400	5.622559
2005-02-18	6.267143	6.275714	6.160714	6.200714	290813600	5.558527
2005-02-22	6.164286	6.307143	6.092143	6.092143	304823400	5.461201
2005-02-23	6.194286	6.317857	6.110714	6.302143	336295400	5.649451
2005-02-24	6.32	6.379286	6.266428	6.352143	379757000	5.694273
2005-02-25	6.401429	6.422143	6.299286	6.356429	228877600	5.698116
2005-02-28	6.382857	6.448571	6.28	6.408571	162902600	5.744858
2005-03-01	6.427143	6.444286	6.308571	6.357143	117047000	5.698756
2005-03-02	6.321429	6.412857	6.297143	6.302857	114540300	5.650093
2005-03-03	6.338572	6.344285	5.888571	5.97	352913400	5.351707
2005-03-04	6.108572	6.144286	5.978571	6.115714	189154700	5.482331
2005-03-07	6.114286	6.178571	6.05	6.107143	112658000	5.474646
2005-03-08	5.985714	6.022857	5.728571	5.79	255362800	5.19035
2005-03-09	5.662857	5.754286	5.547143	5.621428	330616300	5.039236
2005-03-10	5.647143	5.751429	5.585714	5.69	194277300	5.100706
2005-03-11	5.744286	5.798572	5.685714	5.752857	158207700	5.157053
2005-03-14	5.788571	5.827143	5.645714	5.76	151346300	5.163457
2005-03-15	5.805714	5.877143	5.75	5.851429	127152200	5.245416
2005-03-16	5.887143	6.044286	5.825714	5.882857	174453300	5.273589
2005-03-17	5.932857	6.125714	5.902857	6.035714	200480000	5.410616
2005-03-18	6.19	6.205714	6.071429	6.137143	235037600	5.50154
2005-03-21	6.184286	6.281428	6.122857	6.242857	135282000	5.596306
2005-03-22	6.244286	6.28	6.097143	6.118571	137853800	5.484892
2005-03-23	6.064286	6.2	6.002857	6.078571	152455800	5.449034
2005-03-24	6.13	6.142857	6.071429	6.071429	88176200	5.442631
2005-03-28	6.107143	6.137143	6.067143	6.075714	68852700	5.446473
2005-03-29	6.08	6.118571	5.928571	5.964286	115339000	5.346585
2005-03-30	6.01	6.114286	5.974286	6.114286	98739900	5.48105
2005-03-31	6.064286	6.074286	5.941429	5.952857	159033700	5.33634
2005-04-01	6.012857	6.025714	5.795714	5.841429	160321000	5.236452
2005-04-04	5.855714	5.901429	5.737143	5.87	145003600	5.262065
2005-04-05	5.888571	6.034286	5.87	5.984286	139059900	5.364514
2005-04-06	6.057143	6.115714	6.021429	6.047143	103706400	5.420861
2005-04-07	6.047143	6.25	6.035714	6.222857	126746900	5.578376
2005-04-08	6.242857	6.35	6.22	6.248571	162487500	5.601429
2005-04-11	6.307143	6.321429	5.987143	5.988572	205415700	5.368356
2005-04-12	6.07	6.17	6.001429	6.094285	245265300	5.463122
2005-04-13	6.135714	6.141428	5.77	5.862857	342986700	5.255662
2005-04-14	5.544286	5.651429	5.262857	5.322857	688298100	4.771587
2005-04-15	5.231429	5.321429	5.04	5.05	432021800	4.52699
2005-04-18	5	5.185714	4.857143	5.088572	331794400	4.561567
2005-04-19	5.228571	5.348571	5.124286	5.298572	270410700	4.749816
2005-04-20	5.38	5.391428	5.062857	5.072857	236282900	4.547479
2005-04-21	5.2	5.315714	5.128572	5.311429	189898100	4.761343
2005-04-22	5.262857	5.285714	4.985714	5.071429	209782300	4.546198
2005-04-25	5.212857	5.288571	5.158571	5.282857	186615100	4.735729
2005-04-26	5.254286	5.358572	5.16	5.17	202626900	4.634561
2005-04-27	5.127143	5.194286	5.072857	5.135714	153472200	4.603825
2005-04-28	5.184286	5.191429	5.034286	5.077143	143776500	4.551322
2005-04-29	5.164286	5.175714	5.031428	5.151429	167907600	4.617913
2005-05-02	5.172857	5.235714	5.145714	5.204286	116480000	4.665296
2005-05-03	5.2	5.248571	5.147143	5.172857	124184900	4.637122
2005-05-04	5.158571	5.314286	5.157143	5.307143	112044100	4.7575
2005-05-05	5.321429	5.324286	5.21	5.24	96841500	4.697312
2005-05-06	5.27	5.332857	5.255714	5.32	81561900	4.769027
2005-05-09	5.325714	5.35	5.25	5.281428	88923800	4.734449
2005-05-10	5.25	5.321429	5.19	5.202857	110065900	4.664015
2005-05-11	5.028572	5.095714	4.73	5.087143	510495300	4.560286
2005-05-12	5.06	5.084286	4.857143	4.875714	242560500	4.370753
2005-05-13	4.885714	5.032857	4.867143	4.967143	175678300	4.452714
2005-05-16	4.937143	5.1	4.932857	5.078571	118573700	4.552601
2005-05-17	5.02	5.065714	4.934286	5.051429	147086100	4.52827
2005-05-18	5.064286	5.365714	4.998571	5.12	159180700	4.589739
2005-05-19	5.111429	5.382857	5.111429	5.364286	198290400	4.808726
2005-05-20	5.321429	5.378572	5.312857	5.364286	113162700	4.808726
2005-05-23	5.407143	5.7	5.407143	5.68	260643600	5.091742
2005-05-24	5.635714	5.712857	5.575714	5.671429	148365000	5.084058
2005-05-25	5.642857	5.707143	5.617143	5.682857	99001700	5.094304
2005-05-26	5.705714	5.848571	5.705714	5.82	131380200	5.217242
2005-05-27	5.805714	5.827143	5.715714	5.794286	79002000	5.194191
2005-05-31	5.808571	5.82	5.654286	5.68	101051300	5.091742
2005-06-01	5.698571	5.822857	5.694286	5.757143	113453200	5.160896
2005-06-02	5.721428	5.76	5.657143	5.72	93493400	5.127599
2005-06-03	5.451428	5.511428	5.395714	5.462857	239217300	4.897088
2005-06-06	5.475714	5.518571	5.365714	5.417143	202991600	4.856109
2005-06-07	5.371428	5.39	5.207143	5.22	186316200	4.679383
2005-06-08	5.232857	5.321429	5.224286	5.274286	101001600	4.728046
2005-06-09	5.285714	5.42	5.26	5.378572	97563900	4.821531
2005-06-10	5.342857	5.342857	5.074286	5.115714	169733200	4.585896
2005-06-13	5.127143	5.23	5.117143	5.128572	108943100	4.597424
2005-06-14	5.131429	5.164286	5.107143	5.142857	86961700	4.610229
2005-06-15	5.267143	5.328571	5.185714	5.304286	140835800	4.754938
2005-06-16	5.312857	5.44	5.26	5.425714	136918600	4.863792
2005-06-17	5.495714	5.505714	5.404286	5.472857	149031400	4.906052
2005-06-20	5.407143	5.441429	5.35	5.372857	80929100	4.816409
2005-06-21	5.388571	5.455714	5.34	5.408571	92631700	4.848423
2005-06-22	5.465714	5.514286	5.448571	5.507143	106231300	4.936787
2005-06-23	5.547143	5.682857	5.521429	5.555714	168563500	4.980327
2005-06-24	5.584286	5.588572	5.382857	5.394286	102677400	4.835618
2005-06-27	5.262857	5.442857	5.24	5.3	150042900	4.751097
2005-06-28	5.355714	5.37	5.31	5.33	87574900	4.777991
2005-06-29	5.318572	5.327143	5.16	5.195714	112089600	4.657613
2005-06-30	5.23	5.308571	5.187143	5.258572	104597500	4.713959
2005-07-01	5.261428	5.281428	5.184286	5.214286	62500200	4.67426
2005-07-05	5.221428	5.45	5.214286	5.425714	113567300	4.863792
2005-07-06	5.387143	5.451428	5.314286	5.341429	98656600	4.788236
2005-07-07	5.258572	5.394286	5.257143	5.375714	95930800	4.818971
2005-07-08	5.41	5.468572	5.352857	5.464286	72683800	4.898369
2005-07-11	5.481429	5.521429	5.397143	5.442857	97197100	4.879159
2005-07-12	5.461429	5.485714	5.415714	5.462857	96759600	4.897088
2005-07-13	5.47	5.5	5.414286	5.478571	171208800	4.911175
2005-07-14	5.827143	6.001429	5.747143	5.821429	524015100	5.218524
2005-07-15	5.852857	5.938571	5.78	5.935714	171920700	5.320973
2005-07-18	5.915714	6.014286	5.91	5.927143	146574400	5.31329
2005-07-19	5.931428	6.175714	5.867143	6.17	167765500	5.530995
2005-07-20	6.122857	6.257143	6.092857	6.232857	113348900	5.587343
2005-07-21	6.242857	6.291429	6.128572	6.184286	101066000	5.543801
2005-07-22	6.205714	6.285714	6.198571	6.285714	75276600	5.634725
2005-07-25	6.284286	6.325714	6.247143	6.258572	73656800	5.610392
2005-07-26	6.287143	6.301429	6.194286	6.232857	67148200	5.587343
2005-07-27	6.261428	6.295714	6.095714	6.284286	70937300	5.633444
2005-07-28	6.264286	6.285714	6.185714	6.257143	62827800	5.609112
2005-07-29	6.222857	6.34	6.037143	6.092857	140520100	5.461842
2005-08-01	6.081429	6.154286	6.011428	6.107143	78562400	5.474646
2005-08-02	6.127143	6.214286	6.087143	6.17	74218900	5.530995
2005-08-03	6.17	6.187143	6.11	6.174286	64580600	5.534836
2005-08-04	6.127143	6.142857	6.041429	6.101429	67326000	5.469524
2005-08-05	6.07	6.194286	6.002857	6.141428	60482800	5.505383
2005-08-08	6.142857	6.178571	6.087143	6.092857	44095800	5.461842
2005-08-09	6.132857	6.27	6.13	6.26	95209800	5.611674
2005-08-10	6.285714	6.341429	6.187143	6.197143	90236300	5.555326
2005-08-11	6.198571	6.302857	6.178571	6.285714	67995900	5.634725
2005-08-12	6.208571	6.602857	6.194286	6.585714	229009200	5.903654
2005-08-15	6.64	6.904286	6.635714	6.811429	271681900	6.105992
2005-08-16	6.77	6.785714	6.601429	6.607143	134405600	5.922864
2005-08-17	6.628572	6.777143	6.624286	6.735714	124931100	6.038119
2005-08-18	6.701428	6.714286	6.535714	6.614286	110639900	5.929267
2005-08-19	6.611429	6.671429	6.538571	6.547143	94142300	5.869079
2005-08-22	6.592857	6.678571	6.465714	6.552857	96933200	5.874201
2005-08-23	6.55	6.585714	6.474286	6.534286	73901100	5.857553
2005-08-24	6.514286	6.731429	6.512857	6.538571	143017700	5.861394
2005-08-25	6.588572	6.641428	6.544286	6.58	69063400	5.898531
2005-08-26	6.588572	6.62	6.48	6.534286	65264500	5.857553
2005-08-29	6.467143	6.575714	6.465714	6.548572	64073800	5.870358
2005-08-30	6.57	6.684286	6.56	6.652857	129690400	5.963843
2005-08-31	6.694286	6.718572	6.61	6.698571	100739100	6.004824
2005-09-01	6.714286	6.738572	6.584286	6.608572	89091800	5.924145
2005-09-02	6.614286	6.685714	6.588572	6.602857	55594700	5.919022
2005-09-06	6.671429	6.982857	6.65	6.971428	204654800	6.249422
2005-09-07	7.007143	7.057143	6.845714	6.954286	240768500	6.234054
2005-09-08	7.05	7.16	7.02	7.111429	175660100	6.374923
2005-09-09	7.152857	7.335714	7.112857	7.33	153910400	6.570858
2005-09-12	7.3	7.375714	7.225714	7.342857	113199100	6.582384
2005-09-13	7.288571	7.327143	7.188571	7.26	123221000	6.508109
2005-09-14	7.294286	7.312857	7.065714	7.087143	118606600	6.353152
2005-09-15	7.142857	7.168571	7.047143	7.124286	103789000	6.386448
2005-09-16	7.175714	7.315714	7.135714	7.315714	147751100	6.558052
2005-09-19	7.292857	7.555714	7.292857	7.52	195932800	6.74118
2005-09-20	7.57	7.687143	7.56	7.598571	204957200	6.811614
2005-09-21	7.565714	7.578571	7.408571	7.444286	108686900	6.673306
2005-09-22	7.411428	7.495714	7.331429	7.414286	115931900	6.646415
2005-09-23	7.442857	7.642857	7.405715	7.6	139614300	6.812894
2005-09-26	7.718572	7.794286	7.617143	7.691429	136640700	6.894854
2005-09-27	7.702857	7.748571	7.632857	7.634286	85425900	6.843628
2005-09-28	7.581429	7.587143	7.227143	7.297143	281386000	6.541403
2005-09-29	7.318572	7.512857	7.258572	7.477143	159211500	6.702761
2005-09-30	7.475714	7.664286	7.411428	7.658571	132908300	6.865399
2005-10-03	7.737143	7.791429	7.668571	7.777143	126888300	6.971691
2005-10-04	7.85	7.907143	7.662857	7.678571	134864800	6.883329
2005-10-05	7.761428	7.765714	7.535714	7.54	152692400	6.759109
2005-10-06	7.6	7.641428	7.267143	7.385714	189384300	6.6208
2005-10-07	7.388571	7.418571	7.221428	7.328571	169470700	6.569576
2005-10-10	7.394286	7.415714	7.182857	7.195714	126876400	6.450479
2005-10-11	7.318572	7.41	7.2	7.37	306471200	6.606715
2005-10-12	6.95	7.185714	6.838572	7.035714	674371600	6.307049
2005-10-13	7.062857	7.707143	7.038571	7.677143	466393900	6.882048
2005-10-14	7.718572	7.764286	7.541429	7.714286	258888000	6.915344
2005-10-17	7.711429	7.747143	7.525714	7.634286	154208600	6.843628
2005-10-18	7.607143	7.707143	7.457143	7.458571	152397000	6.686112
2005-10-19	7.438571	7.851429	7.315714	7.848571	252170800	7.035722
2005-10-20	7.781428	8.071428	7.764286	8.02	339440500	7.189397
2005-10-21	8.12	8.14	7.908571	7.951428	199181500	7.127927
2005-10-24	7.892857	8.112857	7.87	8.112857	152438300	7.272637
2005-10-25	8.057143	8.121428	7.955714	8.014286	116281900	7.184274
2005-10-26	8.04	8.222857	7.988572	8.147142	157898300	7.30337
2005-10-27	8.141429	8.144286	7.915714	7.915714	102885300	7.095912
2005-10-28	8.005714	8.061429	7.738572	7.781428	192446800	6.975533
2005-10-31	7.885714	8.282857	7.821429	8.227143	235211200	7.375085
2005-11-01	8.177143	8.305715	8.124286	8.214286	187421500	7.363561
2005-11-02	8.245714	8.571428	8.228572	8.564285	214265100	7.677311
2005-11-03	8.608571	8.902857	8.581429	8.835714	221095700	7.92063
2005-11-04	8.621428	8.748571	8.517143	8.735714	219508800	7.830984
2005-11-07	8.692857	8.81	8.591429	8.604285	159707800	7.713169
2005-11-08	8.564285	8.625714	8.442857	8.557143	118441400	7.67091
2005-11-09	8.571428	8.744286	8.571428	8.587143	138232500	7.6978
2005-11-10	8.662857	8.742857	8.43	8.74	166336100	7.834828
2005-11-11	8.791429	8.872857	8.762857	8.791429	106362200	7.880932
2005-11-14	8.791429	8.854285	8.701428	8.778571	92483300	7.869405
2005-11-15	8.8	9.011429	8.78	8.897142	134210300	7.975696
2005-11-16	9.021428	9.294286	9.012857	9.278571	196128800	8.317623
2005-11-17	9.37	9.411428	9.178572	9.217143	169051400	8.262553
2005-11-18	9.33	9.347143	9.195714	9.222857	131240200	8.267678
2005-11-21	9.26	9.312857	9.102858	9.28	127927800	8.318904
2005-11-22	9.262857	9.537143	9.217143	9.502857	135070600	8.518679
2005-11-23	9.554286	9.711429	9.527143	9.587143	121463300	8.594235
2005-11-25	9.665714	9.934286	9.642858	9.905714	98753200	8.879815
2005-11-28	10.102858	10.152857	9.867143	9.951428	254629900	8.920793
2005-11-29	9.998571	10.042857	9.621428	9.728572	222858300	8.721017
2005-11-30	9.775714	9.835714	9.645715	9.688571	148918700	8.685158
2005-12-01	9.85	10.247143	9.83	10.228572	203223300	9.169233
2005-12-02	10.324286	10.391429	10.1	10.375714	223940500	9.301138
2005-12-05	10.278571	10.361428	10.212857	10.26	145917800	9.197408
2005-12-06	10.561429	10.69	10.478572	10.578571	214257400	9.482981
2005-12-07	10.604285	10.637143	10.445714	10.564285	169866200	9.470178
2005-12-08	10.457143	10.595715	10.371428	10.582857	197619800	9.486828
2005-12-09	10.601429	10.655714	10.478572	10.618571	138850600	9.518843
2005-12-12	10.695714	10.764286	10.651428	10.701428	131248600	9.59312
2005-12-13	10.692857	10.78	10.601429	10.711429	123454100	9.602085
2005-12-14	10.361428	10.471429	10.038571	10.287143	362679100	9.22174
2005-12-15	10.382857	10.408571	10.192857	10.311429	140290500	9.24351
2005-12-16	10.305715	10.328571	10.151428	10.158571	167792800	9.106483
2005-12-19	10.158571	10.371428	10.148571	10.197143	132323800	9.141061
2005-12-20	10.232857	10.34	10.16	10.301429	119777000	9.234546
2005-12-21	10.371428	10.515715	10.362857	10.5	118934200	9.412549
2005-12-22	10.558572	10.641429	10.514286	10.574286	92652700	9.479141
2005-12-23	10.595715	10.608571	10.471429	10.478572	57464400	9.393343
2005-12-27	10.571428	10.74	10.564285	10.604285	147647500	9.506035
2005-12-28	10.638572	10.68	10.474286	10.51	99528800	9.421515
2005-12-29	10.54	10.545714	10.202857	10.207143	122506300	9.150025
2005-12-30	10.13	10.347143	10.048572	10.27	156065700	9.206375
2006-01-03	10.34	10.678572	10.321428	10.678572	201808600	9.572629
2006-01-04	10.732857	10.854285	10.642858	10.71	154900900	9.600802
2006-01-05	10.69	10.7	10.535714	10.625714	112355600	9.525245
2006-01-06	10.75	10.957143	10.65	10.9	176114400	9.771125
2006-01-09	10.961429	11.028571	10.82	10.864285	168760200	9.739107
2006-01-10	10.892858	11.698571	10.832857	11.551429	569967300	10.355087
2006-01-11	11.977143	12.114285	11.798572	11.985714	373448600	10.744396
2006-01-12	12.138572	12.342857	11.945714	12.041429	320202400	10.79434
2006-01-13	12.141429	12.287143	12.085714	12.227143	194076400	10.96082
2006-01-17	12.242857	12.34	11.981428	12.101429	208905900	10.848126
2006-01-18	11.868571	12.007143	11.692857	11.784286	300159300	10.563828
2006-01-19	11.607142	11.665714	11.248571	11.291429	423962000	10.122014
2006-01-20	11.325714	11.434286	10.832857	10.87	283689700	9.744233
2006-01-23	10.871428	11.365714	10.857142	11.095715	264932500	9.946567
2006-01-24	11.251429	11.345715	10.824286	10.862857	285563600	9.737827
2006-01-25	11.055715	11.071428	10.464286	10.6	318946600	9.502194
2006-01-26	10.647142	10.775714	10.275714	10.332857	295346800	9.262717
2006-01-27	10.421429	10.514286	10.157143	10.29	238466200	9.224299
2006-01-30	10.167143	10.942857	10.124286	10.714286	349600300	9.604645
2006-01-31	10.785714	10.905714	10.535714	10.787143	228385500	9.669956
2006-02-01	10.707143	10.922857	10.662857	10.774285	130296600	9.658429
2006-02-02	10.728572	10.765715	10.292857	10.3	176830500	9.233264
2006-02-03	10.32	10.398571	10.148571	10.264286	173030900	9.201248
2006-02-06	10.288571	10.358571	9.534286	9.614285	412941900	8.618566
2006-02-07	9.752857	9.925714	9.525714	9.657143	347207700	8.656986
2006-02-08	9.784286	9.868571	9.428572	9.83	238278600	8.811942
2006-02-09	9.871428	9.89	9.218572	9.278571	287441000	8.317623
2006-02-10	9.311429	9.667143	8.985714	9.615714	440119400	8.619848
2006-02-13	9.518572	9.535714	9.234285	9.244286	220874500	8.286888
2006-02-14	9.3	9.728572	9.285714	9.662857	290234700	8.662108
2006-02-15	9.594286	9.945714	9.535714	9.888572	289942800	8.864445
2006-02-16	9.987143	10.144286	9.925714	10.081429	237043800	9.03733
2006-02-17	10.042857	10.127143	9.944285	10.041429	143999800	9.001471
2006-02-21	10.084286	10.114285	9.811429	9.868571	194901700	8.846516
2006-02-22	9.857142	10.238571	9.714286	10.188571	244559700	9.133376
2006-02-23	10.255714	10.428572	10.204286	10.25	214229400	9.188443
2006-02-24	10.305715	10.412857	10.171429	10.208571	133686000	9.151307
2006-02-27	10.284286	10.302857	10.092857	10.141429	197810200	9.091116
2006-02-28	10.225715	10.342857	9.728572	9.784286	316745100	8.770962
2006-03-01	9.834286	9.927143	9.717143	9.871428	190954400	8.84908
2006-03-02	9.855714	9.998571	9.81	9.944285	156318400	8.914392
2006-03-03	9.914286	9.987143	9.647142	9.674286	184417100	8.672354
2006-03-06	9.67	9.674286	9.277143	9.354285	228166400	8.385495
2006-03-07	9.394286	9.557143	9.297143	9.472857	218219400	8.491786
2006-03-08	9.47	9.6	9.335714	9.38	163312800	8.408547
2006-03-09	9.425714	9.495714	9.115714	9.132857	199826200	8.186997
2006-03-10	9.15	9.212857	8.921429	9.027143	260785700	8.092231
2006-03-13	9.292857	9.468572	9.255714	9.382857	215296900	8.411107
2006-03-14	9.395715	9.617143	9.357142	9.617143	160505100	8.621128
2006-03-15	9.672857	9.72	9.36	9.461429	222999000	8.48154
2006-03-16	9.55	9.557143	9.185715	9.187143	187409600	8.235663
2006-03-17	9.25	9.362857	9.158571	9.237143	203010500	8.280485
2006-03-20	9.317142	9.351429	9.124286	9.141429	151360300	8.194681
2006-03-21	8.83	9.191428	8.77	8.83	336341600	7.915507
2006-03-22	8.88	9.035714	8.752857	8.81	336473900	7.897579
2006-03-23	8.831429	8.842857	8.515715	8.594286	356956600	7.704202
2006-03-24	8.607142	8.705714	8.432858	8.565714	267995000	7.678593
2006-03-27	8.621428	8.768572	8.485714	8.501429	277018000	7.620966
2006-03-28	8.518572	8.591429	8.321428	8.387143	342580700	7.518515
2006-03-29	8.447143	8.931429	8.238571	8.904285	586708500	7.982099
2006-03-30	8.974286	9.042857	8.79	8.964286	347662700	8.035887
2006-03-31	9.035714	9.087143	8.891429	8.96	203839300	8.032043
2006-04-03	9.095715	9.16	8.944285	8.95	203947800	8.02308
2006-04-04	8.871428	8.888572	8.721429	8.738571	232981000	7.833548
2006-04-05	9.244286	9.601429	9.164286	9.601429	558352200	8.607041
2006-04-06	9.757143	10.292857	9.742857	10.177143	665942200	9.123134
2006-04-07	10.132857	10.172857	9.781428	9.97	386309700	8.937442
2006-04-10	10.041429	10.132857	9.778571	9.81	225878800	8.794013
2006-04-11	9.855714	9.9	9.581429	9.712857	234829000	8.706932
2006-04-12	9.715714	9.738571	9.471429	9.53	184973600	8.543012
2006-04-13	9.477143	9.634286	9.401428	9.495714	183669500	8.512275
2006-04-17	9.501429	9.548572	9.192857	9.258572	180484500	8.299693
2006-04-18	9.291429	9.495714	9.255714	9.46	198711100	8.480261
2006-04-19	9.545714	9.571428	9.352858	9.378572	271508300	8.407266
2006-04-20	9.93	10	9.457143	9.661428	416745700	8.66083
2006-04-21	9.741428	9.805715	9.495714	9.577143	197246700	8.585269
2006-04-24	9.55	9.56	9.357142	9.392858	176757000	8.420072
2006-04-25	9.422857	9.512857	9.365714	9.452857	132265700	8.473857
2006-04-26	9.521428	9.754286	9.485714	9.735714	177721600	8.727422
2006-04-27	9.675714	9.98	9.621428	9.908571	211486800	8.882376
2006-04-28	9.911428	10.185715	9.885715	10.055715	190009400	9.014277
2006-05-01	10.11	10.22	9.88	9.942857	187595100	8.913109
2006-05-02	10.021428	10.282857	10.015715	10.231428	192915800	9.171793
2006-05-03	10.261429	10.278571	10.025714	10.162857	171747800	9.110323
2006-05-04	10.174286	10.412857	10.065714	10.161428	215105100	9.109045
2006-05-05	10.265715	10.321428	10.164286	10.27	140977900	9.206375
2006-05-08	10.427143	10.542857	10.245714	10.27	148712900	9.206375
2006-05-09	10.26	10.365714	10.088572	10.147142	132916700	9.096238
2006-05-10	10.184286	10.19	9.944285	10.085714	114972200	9.041172
2006-05-11	10.112857	10.12	9.65	9.735714	203172200	8.727422
2006-05-12	9.692857	9.812857	9.551429	9.671429	160443500	8.669793
2006-05-15	9.624286	9.768572	9.588572	9.684286	132294400	8.681316
2006-05-16	9.728572	9.75	9.25	9.282857	234185000	8.321465
2006-05-17	9.244286	9.385715	9.152857	9.322857	188548500	8.357319
2006-05-18	9.382857	9.465714	9.017143	9.025714	164610600	8.090951
2006-05-19	9.037143	9.268572	8.974286	9.215714	246466500	8.261274
2006-05-22	9.124286	9.141429	8.967143	9.054286	179743900	8.116566
2006-05-23	9.265715	9.312857	9	9.021428	173603500	8.087111
2006-05-24	8.998571	9.092857	8.794286	9.048572	229007800	8.111444
2006-05-25	9.18	9.207143	9.041429	9.19	115843000	8.238221
2006-05-26	9.187143	9.222857	9.02	9.078571	108237500	8.138334
2006-05-30	9.041429	9.042857	8.745714	8.745714	140850500	7.83995
2006-05-31	8.822857	8.827143	8.384286	8.538571	320244400	7.654261
2006-06-01	8.55	8.897142	8.502857	8.881429	235627000	7.961609
2006-06-02	8.998571	9.014286	8.697143	8.808572	171446800	7.896299
2006-06-05	8.735714	8.735714	8.567142	8.571428	151446400	7.683715
2006-06-06	8.602858	8.661428	8.415714	8.531428	181509300	7.647859
2006-06-07	8.585714	8.628572	8.335714	8.365714	187626600	7.499305
2006-06-08	8.348572	8.704286	8.164286	8.68	349370700	7.781043
2006-06-09	8.74	8.794286	8.442857	8.462857	193959500	7.586387
2006-06-12	8.485714	8.532857	8.137143	8.142858	179446400	7.299531
2006-06-13	8.23	8.442857	8.194285	8.332857	270160800	7.469853
2006-06-14	8.325714	8.397142	8.098572	8.23	219534000	7.377646
2006-06-15	8.185715	8.534286	8.107142	8.482857	297595900	7.604317
2006-06-16	8.422857	8.455714	8.217143	8.222857	209525400	7.371244
2006-06-19	8.261429	8.311429	8.142858	8.171429	176143800	7.325142
2006-06-20	8.23	8.335714	8.184286	8.21	168243600	7.359719
2006-06-21	8.248571	8.387143	8.185715	8.265715	215824000	7.409664
2006-06-22	8.314285	8.535714	8.295714	8.511429	241408300	7.62993
2006-06-23	8.531428	8.595715	8.39	8.404285	165050900	7.533884
2006-06-26	8.452857	8.457143	8.338572	8.427143	116634000	7.554375
2006-06-27	8.441428	8.46	8.2	8.204286	137652900	7.354596
2006-06-28	8.184286	8.185715	7.915714	8.002857	212676100	7.174028
2006-06-29	8.108571	8.441428	8.055715	8.424286	218349600	7.551811
2006-06-30	8.227143	8.25	8.071428	8.181429	184923900	7.334107
2006-07-03	8.217143	8.311429	8.191428	8.278571	48692700	7.421189
2006-07-05	8.164286	8.228572	8.08	8.142858	129560200	7.299531
2006-07-06	8.155714	8.2	7.944286	7.967143	158302200	7.142014
2006-07-07	7.925714	8.078571	7.81	7.914286	199840200	7.09463
2006-07-10	7.957143	8.07	7.785714	7.857143	132336400	7.043406
2006-07-11	7.872857	7.998571	7.79	7.95	206255700	7.126646
2006-07-12	7.881429	7.891428	7.56	7.565714	231832300	6.782159
2006-07-13	7.432857	7.731429	7.344285	7.464286	312476500	6.691236
2006-07-14	7.5	7.555714	7.165714	7.238572	248259200	6.488897
2006-07-17	7.39	7.587143	7.378572	7.481429	256135600	6.706603
2006-07-18	7.594285	7.692857	7.407143	7.557143	250112100	6.774477
2006-07-19	7.565714	7.868571	7.48	7.728571	347685800	6.928151
2006-07-20	8.708571	8.798572	8.531428	8.642858	493036600	7.747746
2006-07-21	8.545714	8.735714	8.52	8.674286	222973100	7.775923
2006-07-24	8.751429	8.871428	8.632857	8.774285	180714100	7.865563
2006-07-25	8.825714	8.87	8.682858	8.847143	147267400	7.930875
2006-07-26	8.857142	9.234285	8.811429	9.124286	224606900	8.179315
2006-07-27	9.214286	9.288571	8.98	9.057143	183761200	8.119124
2006-07-28	9.134286	9.382857	9.071428	9.37	172876900	8.39958
2006-07-31	9.547143	9.804286	9.468572	9.708571	223210400	8.703087
2006-08-01	9.602858	9.704286	9.42	9.597143	177941400	8.603201
2006-08-02	9.664286	9.811429	9.644286	9.737143	137692100	8.7287
2006-08-03	9.701428	10	9.687143	9.941428	210261100	8.91183
2006-08-04	9.578571	9.801429	9.28	9.757143	463216600	8.746629
2006-08-07	9.674286	9.942857	9.472857	9.601429	311378200	8.607041
2006-08-08	9.584286	9.587143	9.215714	9.254286	249466000	8.295851
2006-08-09	9.347143	9.371428	9.057143	9.084286	238959700	8.143457
2006-08-10	9.035714	9.258572	8.957143	9.152857	174440000	8.204928
2006-08-11	9.032857	9.161428	8.94	9.092857	194382300	8.151141
2006-08-14	9.15	9.317142	9.085714	9.134286	179405100	8.188277
2006-08-15	9.334286	9.5	9.257143	9.492857	215338200	8.509715
2006-08-16	9.585714	9.724286	9.475715	9.711429	195321000	8.705649
2006-08-17	9.714286	9.808572	9.597143	9.655714	145287100	8.655703
2006-08-18	9.672857	9.771428	9.608571	9.701428	134088500	8.696686
2006-08-21	9.614285	9.615714	9.45	9.508572	131556600	8.523801
2006-08-22	9.525714	9.76	9.5	9.66	144242000	8.659546
2006-08-23	9.714286	9.807143	9.562857	9.615714	134064700	8.619848
2006-08-24	9.698571	9.741428	9.467143	9.687143	163797900	8.683881
2006-08-25	9.62	9.864285	9.615714	9.821428	135989700	8.804256
2006-08-28	9.785714	9.801429	9.525714	9.568571	184540300	8.577589
2006-08-29	9.57	9.608571	9.302857	9.497143	236833100	8.513556
2006-08-30	9.62	9.688571	9.525714	9.565714	170035600	8.575025
2006-08-31	9.611428	9.757143	9.522857	9.692857	143674300	8.688998
2006-09-01	9.782857	9.807143	9.688571	9.768572	102123700	8.756875
2006-09-05	9.852858	10.214286	9.792857	10.211429	253114400	9.153869
2006-09-06	10.154285	10.241428	9.957143	10.004286	243525800	8.968176
2006-09-07	10.085714	10.497143	10.035714	10.4	316989400	9.322908
2006-09-08	10.481428	10.51	10.272857	10.36	223980400	9.287052
2006-09-11	10.347143	10.532857	10.202857	10.357142	237281100	9.284491
2006-09-12	10.401428	10.492857	10.207143	10.375714	421171800	9.301138
2006-09-13	10.407143	10.617143	10.328571	10.6	286534500	9.502194
2006-09-14	10.531428	10.667143	10.494286	10.595715	200432400	9.498355
2006-09-15	10.657143	10.711429	10.47	10.585714	245463400	9.489389
2006-09-18	10.542857	10.694285	10.471429	10.555715	176319500	9.462497
2006-09-19	10.585714	10.622857	10.4	10.538571	177512300	9.447129
2006-09-20	10.625714	10.811429	10.602858	10.751429	205697800	9.637942
2006-09-21	10.75	10.865714	10.574286	10.664286	198531200	9.559822
2006-09-22	10.614285	10.62	10.368571	10.428572	166278000	9.34852
2006-09-25	10.544286	10.837143	10.531428	10.821428	214748100	9.70069
2006-09-26	10.882857	11.111428	10.871428	11.087143	275737000	9.938885
2006-09-27	11.024285	11.067142	10.831429	10.915714	202593300	9.78521
2006-09-28	11.002857	11.068571	10.85	11.001429	180902400	9.862048
2006-09-29	11.015715	11.074286	10.954286	10.997143	101453100	9.858208
2006-10-02	10.728572	10.838572	10.614285	10.694285	178159800	9.586717
2006-10-03	10.635715	10.707143	10.455714	10.582857	197677200	9.486828
2006-10-04	10.585714	10.78	10.451428	10.768572	207270700	9.653308
2006-10-05	10.647142	10.88	10.59	10.69	170970800	9.582876
2006-10-06	10.631429	10.72	10.544286	10.602858	116739700	9.504756
2006-10-09	10.542857	10.725715	10.504286	10.661428	109555600	9.557261
2006-10-10	10.648571	10.654285	10.44	10.544286	132897100	9.452249
2006-10-11	10.488571	10.568571	10.371428	10.461429	142963800	9.377975
2006-10-12	10.515715	10.77	10.514286	10.751429	148213800	9.637942
2006-10-13	10.804286	10.982857	10.677143	10.717143	171049200	9.607205
2006-10-16	10.741428	10.84	10.684286	10.771428	127173200	9.655869
2006-10-17	10.72	10.752857	10.577143	10.612857	120231300	9.51372
2006-10-18	10.678572	10.767143	10.558572	10.647142	283476900	9.544454
2006-10-19	11.322857	11.421429	11.165714	11.284286	378244300	10.115615
2006-10-20	11.281428	11.427143	11.238571	11.421429	159853400	10.238549
2006-10-23	11.427143	11.7	11.392858	11.637143	208126800	10.431924
2006-10-24	11.601429	11.668571	11.457143	11.578571	115803100	10.379418
2006-10-25	11.621428	11.714286	11.572857	11.668571	121303700	10.460097
2006-10-26	11.7	11.8	11.59	11.741428	108189200	10.52541
2006-10-27	11.678572	11.778571	11.43	11.487143	148741600	10.297459
2006-10-30	11.427143	11.557143	11.357142	11.488571	124979400	10.298738
2006-10-31	11.635715	11.668571	11.461429	11.582857	125368600	10.383262
2006-11-01	11.585714	11.625714	11.194285	11.308572	152798100	10.137384
2006-11-02	11.274285	11.331429	11.214286	11.282857	116370800	10.11433
2006-11-03	11.337143	11.361428	11.112857	11.184286	107972200	10.02597
2006-11-06	11.278571	11.437143	11.204286	11.387143	108644200	10.207817
2006-11-07	11.492857	11.571428	11.447143	11.501429	131483100	10.310265
2006-11-08	11.431429	11.812857	11.412857	11.778571	172729200	10.558704
2006-11-09	11.842857	12.098572	11.731428	11.905714	230763400	10.67268
2006-11-10	11.935715	11.942857	11.785714	11.874286	93466100	10.644506
2006-11-13	11.888572	12.064285	11.805715	12.05	112668500	10.802022
2006-11-14	12.114285	12.142858	11.985714	12.142858	147238700	10.885262
2006-11-15	12.15	12.271428	12	12.007143	163830800	10.763603
2006-11-16	12.124286	12.328571	12.088572	12.23	173485200	10.963384
2006-11-17	12.162857	12.277143	12.142858	12.264286	116606000	10.994117
2006-11-20	12.2	12.428572	12.171429	12.352858	142698500	11.073514
2006-11-21	12.488571	12.657143	12.444285	12.657143	155666700	11.346288
2006-11-22	12.712857	12.964286	12.55	12.901428	167985300	11.565272
2006-11-24	12.79	13.297143	12.785714	13.09	129669400	11.734314
2006-11-27	13.215714	13.308572	12.785714	12.791429	268709000	11.466663
2006-11-28	12.908571	13.138572	12.844286	13.115714	259043400	11.757366
2006-11-29	13.285714	13.307143	12.892858	13.114285	289270800	11.756085
2006-11-30	13.172857	13.24	13.008572	13.094286	217621600	11.738157
2006-12-01	13.114285	13.19	12.871428	13.045714	198769900	11.694616
2006-12-04	13.125714	13.15	12.928572	13.017143	177384200	11.669004
2006-12-05	13.092857	13.19	12.981428	13.038571	165709600	11.688211
2006-12-06	12.948571	13.055715	12.81	12.832857	159546100	11.503802
2006-12-07	12.861428	12.928572	12.414286	12.434286	251206900	11.146508
2006-12-08	12.461429	12.77	12.428572	12.608571	196069300	11.302747
2006-12-11	12.7	12.757143	12.578571	12.678572	124945100	11.365495
2006-12-12	12.658571	12.691428	12.218572	12.305715	256655000	11.031257
2006-12-13	12.564285	12.724286	12.45	12.721429	214263000	11.403915
2006-12-14	12.721429	12.857142	12.608571	12.65	208082700	11.339885
2006-12-15	12.717143	12.745714	12.475715	12.531428	184984800	11.233591
2006-12-18	12.518572	12.571428	12.084286	12.21	180394200	10.945451
2006-12-19	12.104285	12.382857	11.945714	12.33	227851400	11.053025
2006-12-20	12.352858	12.381429	12.105714	12.108571	141922900	10.854528
2006-12-21	12.1	12.211429	11.742857	11.842857	225899800	10.616336
2006-12-22	11.922857	12.005714	11.657143	11.742857	153325900	10.52669
2006-12-26	11.735714	11.795714	11.555715	11.644286	122672200	10.438329
2006-12-27	11.164286	11.714286	10.967143	11.645715	483938700	10.43961
2006-12-28	11.46	11.607142	11.378572	11.552857	279969200	10.356368
2006-12-29	11.992857	12.2	11.908571	12.12	269107300	10.864773
2007-01-03	12.327143	12.368571	11.7	11.971429	309579900	10.731588
2007-01-04	12.007143	12.278571	11.974286	12.237143	211815100	10.969785
2007-01-05	12.252857	12.314285	12.057143	12.15	208685400	10.891665
2007-01-08	12.28	12.361428	12.182858	12.21	199276700	10.945451
2007-01-09	12.35	13.282857	12.164286	13.224286	837324600	11.854692
2007-01-10	13.535714	13.971429	13.35	13.857142	738220000	12.422006
2007-01-11	13.705714	13.825714	13.585714	13.685715	360063200	12.268334
2007-01-12	13.512857	13.58	13.318571	13.517143	328172600	12.11722
2007-01-16	13.668571	13.892858	13.635715	13.871428	311019100	12.434812
2007-01-17	13.937143	13.942857	13.545714	13.564285	411565000	12.15948
2007-01-18	13.157143	13.158571	12.721429	12.724286	591151400	11.406476
2007-01-19	12.661428	12.807143	12.588572	12.642858	341118400	11.333481
2007-01-22	12.734285	12.737143	12.235714	12.398571	363506500	11.114495
2007-01-23	12.247143	12.501429	12.215714	12.242857	301856100	10.974908
2007-01-24	12.382857	12.45	12.297143	12.385715	231953400	11.102969
2007-01-25	12.444285	12.642858	12.29	12.321428	226493400	11.045341
2007-01-26	12.444285	12.481428	12.141429	12.197143	246718500	10.933926
2007-01-29	12.328571	12.378572	12.218572	12.277143	225416100	11.005641
2007-01-30	12.347143	12.355714	12.178572	12.221429	144492600	10.955698
2007-01-31	12.122857	12.285714	12.05	12.247143	214017300	10.978748
2007-02-01	12.318571	12.324286	12.105714	12.105714	166085500	10.851967
2007-02-02	12.017143	12.178572	11.957143	12.107142	155382500	10.853251
2007-02-05	12.042857	12.175714	11.991428	11.991428	144713100	10.749517
2007-02-06	12.064285	12.067142	11.837143	12.021428	216098400	10.776408
2007-02-07	12.068571	12.34	11.935715	12.307143	266706300	11.032534
2007-02-08	12.204286	12.358571	12.201428	12.311429	169757700	11.036374
2007-02-09	12.268572	12.314285	11.887143	11.895715	215135200	10.663718
2007-02-12	12.061429	12.168571	11.947143	12.125714	181017900	10.869898
2007-02-13	12.165714	12.184286	12.042857	12.1	145246500	10.846849
2007-02-14	12.09	12.234285	12.081429	12.185715	126995400	10.923683
2007-02-15	12.205714	12.231428	12.111428	12.172857	90915300	10.912156
2007-02-16	12.178572	12.201428	12.094286	12.118571	99967000	10.863493
2007-02-20	12.092857	12.308572	12.022857	12.271428	154425600	11.00052
2007-02-21	12.282857	12.784286	12.28	12.742857	288828400	11.423125
2007-02-22	12.971429	12.972857	12.647142	12.787143	209556200	11.462824
2007-02-23	12.737143	12.905714	12.692857	12.724286	129473400	11.406476
2007-02-26	12.834286	12.857142	12.515715	12.644286	153962200	11.334761
2007-02-27	12.328571	12.44	11.915714	11.99	286453300	10.748238
2007-02-28	11.857142	12.228572	11.857142	12.087143	229868800	10.835322
2007-03-01	12.004286	12.615714	11.964286	12.437143	353882200	11.149072
2007-03-02	12.395715	12.505714	12.172857	12.201428	215000100	10.937767
2007-03-05	12.27	12.664286	12.251429	12.331429	209724900	11.054307
2007-03-06	12.542857	12.615714	12.485714	12.598572	180796700	11.293781
2007-03-07	12.578571	12.71	12.492857	12.531428	156571100	11.233591
2007-03-08	12.655714	12.674286	12.494286	12.571428	127752800	11.26945
2007-03-09	12.685715	12.692857	12.485714	12.567142	112959000	11.265606
2007-03-12	12.581429	12.855714	12.57	12.838572	182352100	11.508924
2007-03-13	12.772857	12.942857	12.628572	12.628572	216972700	11.320674
2007-03-14	12.657143	12.857142	12.56	12.857142	199146500	11.525572
2007-03-15	12.851429	12.908571	12.758572	12.795714	139874700	11.470506
2007-03-16	12.791429	12.855714	12.76	12.798572	142926000	11.473066
2007-03-19	12.891429	13.078571	12.798572	13.018572	178240300	11.670282
2007-03-20	13.05	13.12	13.008572	13.068571	122229100	11.715105
2007-03-21	13.141429	13.428572	13.092857	13.41	171724000	12.021172
2007-03-22	13.39	13.48	13.285714	13.422857	140373100	12.032698
2007-03-23	13.335714	13.438571	13.328571	13.36	112721000	11.976349
2007-03-26	13.427143	13.7	13.328571	13.692857	216246800	12.274734
2007-03-27	13.672857	13.832857	13.571428	13.637143	233013200	12.224792
2007-03-28	13.554286	13.628572	13.307143	13.32	235584300	11.940492
2007-03-29	13.455714	13.455714	13.175714	13.392858	181430900	12.005805
2007-03-30	13.468572	13.525714	13.25	13.272857	150139500	11.898231
2007-04-02	13.448571	13.464286	13.288571	13.378572	125498100	11.992999
2007-04-03	13.448571	13.604285	13.394286	13.5	145983600	12.101851
2007-04-04	13.562857	13.591429	13.447143	13.467143	119196000	12.072398
2007-04-05	13.445714	13.525714	13.36	13.525714	88879000	12.124902
2007-04-09	13.601429	13.614285	13.291429	13.378572	103335400	11.992999
2007-04-10	13.381429	13.465714	13.344286	13.464286	88116700	12.069839
2007-04-11	13.414286	13.421429	13.19	13.227143	137254600	11.857251
2007-04-12	13.148571	13.187143	12.96	13.17	164168900	11.806027
2007-04-13	12.985714	13.057143	12.865714	12.891429	179985400	11.556306
2007-04-16	12.938571	13.071428	12.892858	13.061429	152258400	11.708703
2007-04-17	13.142858	13.185715	12.814285	12.907143	187980100	11.570395
2007-04-18	12.88	12.978572	12.8	12.914286	116011000	11.576797
2007-04-19	12.884286	13.035714	12.832857	12.895715	106478400	11.56015
2007-04-20	12.984285	13.025714	12.935715	12.995714	130694900	11.649794
2007-04-23	13.084286	13.4	13.06	13.358571	195072500	11.975071
2007-04-24	13.422857	13.77	13.042857	13.32	263813200	11.940492
2007-04-25	13.461429	13.628572	13.4	13.621428	296786000	12.210709
2007-04-26	14.511429	14.642858	14.042857	14.12	434444500	12.657641
2007-04-27	14.025714	14.278571	13.955714	14.274285	174850900	12.795946
2007-04-30	14.298572	14.428572	14.238571	14.257143	154127400	12.780581
2007-05-01	14.227143	14.335714	14.078571	14.21	133130900	12.738319
2007-05-02	14.235714	14.362857	14.21	14.341429	126286300	12.856138
2007-05-03	14.39	14.492857	14.287143	14.342857	144019400	12.857415
2007-05-04	14.4	14.514286	14.357142	14.401428	95496800	12.909922
2007-05-07	14.44	14.907143	14.43	14.845715	215389300	13.308197
2007-05-08	14.781428	15.021428	14.774285	15.008572	195999300	13.454184
2007-05-09	14.987143	15.28	14.984285	15.268572	179439400	13.687257
2007-05-10	15.232857	15.548572	15.131429	15.334286	299314400	13.746166
2007-05-11	15.391429	15.59	15.254286	15.534286	163424100	13.925454
2007-05-14	15.66	15.714286	15.464286	15.622857	162986600	14.004852
2007-05-15	15.652857	15.742857	15.211429	15.36	238628600	13.769217
2007-05-16	15.504286	15.547143	14.774285	15.334286	281691900	13.746166
2007-05-17	15.307143	15.695714	15.307143	15.634286	183822800	14.015098
2007-05-18	15.747143	15.805715	15.681429	15.717143	155336300	14.089373
2007-05-21	15.758572	16.064285	15.721429	15.997143	159973100	14.340376
2007-05-22	16.07	16.25	16.001429	16.219999	143102400	14.540149
2007-05-23	16.288572	16.428572	16.084286	16.127142	227843700	14.456912
2007-05-24	16.115715	16.351429	15.767143	15.812857	221840500	14.175173
2007-05-25	16	16.254286	15.928572	16.231428	158239900	14.550395
2007-05-29	16.35	16.408571	16.098572	16.335714	161423500	14.643882
2007-05-30	16.328571	16.982857	16.218571	16.967142	369611200	15.209914
2007-05-31	17.152857	17.452858	17.077143	17.312857	324266600	15.519823
2007-06-01	17.299999	17.312857	16.898571	16.914286	221315500	15.162531
2007-06-04	16.947144	17.389999	16.842857	17.332857	221668300	15.537753
2007-06-05	17.344286	17.527143	17.214285	17.524286	230196400	15.709361
2007-06-06	17.471428	17.721428	17.421429	17.662857	278060300	15.833576
2007-06-07	17.855715	18.23	17.598572	17.724285	478769900	15.888645
2007-06-08	17.974285	17.975714	17.469999	17.784286	310420600	15.942432
2007-06-11	18	18.021429	17.077143	17.17	468564600	15.391762
2007-06-12	17.049999	17.387142	16.901428	17.197144	356641600	15.416092
2007-06-13	17.307142	17.312857	16.485714	16.785715	430338300	15.047276
2007-06-14	16.742857	17.064285	16.631428	16.964285	243316500	15.207353
2007-06-15	17.231428	17.238571	17.122858	17.214285	202804700	15.431462
2007-06-18	17.611429	17.882856	17.505714	17.870001	227651200	16.019264
2007-06-19	17.812857	17.858572	17.558571	17.665714	235756500	15.836138
2007-06-20	17.695715	17.808571	17.357143	17.364286	224378000	15.565925
2007-06-21	17.385714	17.755714	17.245714	17.700001	216761300	15.866874
2007-06-22	17.692858	17.778572	17.482857	17.571428	157969000	15.751616
2007-06-25	17.741428	17.870001	17.294285	17.477142	241350900	15.667096
2007-06-26	17.711428	17.714285	16.959999	17.092857	336251300	15.322611
2007-06-27	17.23	17.434286	17.037144	17.412857	243674200	15.609463
2007-06-28	17.48	17.498571	17.142857	17.222857	209535900	15.439143
2007-06-29	17.424286	17.714285	17.298571	17.434286	284460400	15.628678
2007-07-02	17.292856	17.441429	17.042856	17.322857	248715600	15.528787
2007-07-03	17.428572	18.200001	17.357143	18.167143	290620400	16.285633
2007-07-05	18.4	18.995714	18.384285	18.964285	363262900	17.000221
2007-07-06	19.018572	19.048571	18.628571	18.9	218673700	16.942589
2007-07-09	18.911428	18.985714	18.454287	18.618572	248955000	16.690311
2007-07-10	18.411428	19.214285	18.401428	18.907143	313751900	16.948996
2007-07-11	18.867144	19.1	18.758572	18.912857	205443000	16.954121
2007-07-12	19.121429	19.177143	18.912857	19.152857	176152200	17.16926
2007-07-13	19.290001	19.692858	19.217142	19.675714	226901500	17.63797
2007-07-16	19.77	19.997143	19.642857	19.728571	234028200	17.685354
2007-07-17	19.757143	19.942858	19.642857	19.844286	177489900	17.789083
2007-07-18	19.741428	19.777143	19.434286	19.731428	189214200	17.687916
2007-07-19	20.042856	20.115715	19.950001	20	183222900	17.928667
2007-07-20	20.235714	20.597143	20	20.535715	291943400	18.408903
2007-07-23	20.472857	20.745714	20.132856	20.528572	259122500	18.402496
2007-07-24	19.84	20.142857	19.164286	19.27	448823200	17.274271
2007-07-25	19.621429	19.765715	19.285715	19.608572	374045700	17.577784
2007-07-26	20.844286	21.214285	19.565714	20.857143	546657300	18.697041
2007-07-27	20.884285	21.274286	20.540001	20.549999	290274600	18.421707
2007-07-30	20.618572	20.778572	19.938572	20.204287	276747100	18.111801
2007-07-31	20.424286	20.497143	18.788572	18.822857	440598200	16.873434
2007-08-01	19.091429	19.34	18.252857	19.285715	437539200	17.288361
2007-08-02	19.521429	19.565714	19.164286	19.498571	213161200	17.479176
2007-08-03	19.322857	19.421429	18.785715	18.835714	169796900	16.884966
2007-08-06	18.985714	19.324286	18.328571	19.321428	231292600	17.320368
2007-08-07	19.277143	19.605715	18.947144	19.290001	237484100	17.292204
2007-08-08	19.537144	19.551428	18.857143	19.144285	202024200	17.161585
2007-08-09	18.73	19	17.870001	18.055714	281348900	16.185745
2007-08-10	17.588572	18.25	17.185715	17.857143	352687300	16.007738
2007-08-13	18.331429	18.478571	18.071428	18.255714	188227900	16.365036
2007-08-14	18.327143	18.328571	17.672857	17.718571	184751700	15.88352
2007-08-15	17.534286	17.837143	17.092857	17.128571	248213000	15.354622
2007-08-16	16.715714	16.928572	15.945714	16.721428	466672500	14.989646
2007-08-17	17.43	17.642857	17.117144	17.437143	298765600	15.631235
2007-08-20	17.70857	17.785715	17.214285	17.459999	200829300	15.651728
2007-08-21	17.45857	18.422857	17.285715	18.224285	325761800	16.336861
2007-08-22	18.745714	18.964285	18.618572	18.93	265441400	16.969484
2007-08-23	19.012857	19.048571	18.537144	18.724285	216709500	16.785072
2007-08-24	18.647142	19.338572	18.544285	19.328571	227958500	17.326777
2007-08-27	19.055714	19.237143	18.871429	18.892857	176859900	16.936188
2007-08-28	18.712856	18.915714	18.09	18.117144	294841400	16.240812
2007-08-29	18.554285	19.168571	18.505714	19.154285	291715200	17.170538
2007-08-30	18.952858	19.75	18.9	19.464285	358895600	17.448439
2007-08-31	19.927143	19.950001	19.629999	19.782858	219221800	17.734016
2007-09-04	19.991428	20.818571	19.977142	20.594286	329210700	18.461405
2007-09-05	20.709999	20.834286	19.442858	19.537144	582055600	17.51375
2007-09-06	19.365715	19.652857	18.95857	19.287144	475315400	17.289637
2007-09-07	18.858572	18.9	18.571428	18.824286	357644000	16.874718
2007-09-10	19.57	19.719999	19.135714	19.530001	371959700	17.507343
2007-09-11	19.700001	19.757143	19.107143	19.355715	242971400	17.35111
2007-09-12	19.427143	19.914286	19.392857	19.549999	255692500	17.525278
2007-09-13	19.832857	19.857143	19.521429	19.6	164040800	17.570095
2007-09-14	19.51	19.854286	19.457144	19.83	151830000	17.776274
2007-09-17	19.855715	20.084286	19.657143	19.772858	198342900	17.725054
2007-09-18	19.865715	20.407143	19.690001	20.131428	266022400	18.046482
2007-09-19	20.431429	20.451429	19.914286	20.110001	256720100	18.027277
2007-09-20	20.021429	20.255714	19.902857	20.044285	172960200	17.968367
2007-09-21	20.162857	20.664286	20.044285	20.592857	284720100	18.460123
2007-09-24	20.961428	21.407143	20.950001	21.182858	263040400	18.989023
2007-09-25	20.977142	21.888571	20.974285	21.882856	298137700	19.616522
2007-09-26	22.067142	22.142857	21.607143	21.824286	243817000	19.56402
2007-09-27	21.967142	22.074286	21.76	22.071428	164549700	19.785568
2007-09-28	21.92	22.085714	21.821428	21.924286	153775300	19.653664
2007-10-01	22.09	22.487143	21.847143	22.334286	209267100	20.021204
2007-10-02	22.364286	22.655714	22.27	22.635714	198017400	20.291412
2007-10-03	22.540001	22.74	22.43	22.559999	173129600	20.223536
2007-10-04	22.571428	22.582857	21.928572	22.32	164239600	20.008396
2007-10-05	22.624287	23.082857	22.528572	23.064285	235867800	20.6756
2007-10-08	23.355715	23.987143	23.281429	23.987143	208982200	21.502874
2007-10-09	24.314285	24.444286	23.811428	23.98	276071600	21.496475
2007-10-10	23.935715	23.982857	23.657143	23.827143	166897500	21.359447
2007-10-11	24.212856	24.554285	21.887142	23.175714	410998000	20.775484
2007-10-12	23.287144	23.897142	23.114286	23.892857	247044000	21.418356
2007-10-15	23.997143	24.224285	23.357143	23.854286	269482500	21.38378
2007-10-16	23.648571	24.311428	23.592857	24.225714	266957600	21.71674
2007-10-17	24.67	24.719999	24.168571	24.678572	281903300	22.122698
2007-10-18	24.5	24.884285	24.435715	24.785715	205919000	22.218744
2007-10-19	24.891428	24.947144	24.285715	24.345715	322945000	21.824312
2007-10-22	24.335714	24.985714	24.280001	24.908571	412374900	22.328878
2007-10-23	26.937143	26.942858	26.108572	26.594286	448791000	23.840008
2007-10-24	26.544285	26.744286	25.605715	26.561428	322120400	23.810555
2007-10-25	26.41	26.557142	25.951429	26.111429	243400500	23.407162
2007-10-26	26.469999	26.481428	26.125713	26.385714	176719200	23.653038
2007-10-29	26.492857	26.655714	26.385714	26.441429	135138500	23.702988
2007-10-30	26.597143	27.052856	26.389999	26.714285	234853500	23.947578
2007-10-31	26.804285	27.16	26.421429	27.135714	208327700	24.325365
2007-11-01	26.942858	27.157143	25.714285	26.777143	201259100	24.003931
2007-11-02	27.030001	27.062857	26.212856	26.838572	250528600	24.058996
2007-11-05	26.469999	26.994286	26.32	26.597143	201044200	23.842573
2007-11-06	26.721428	27.428572	26.467142	27.398571	238681800	24.560997
2007-11-07	27.23	27.525715	26.59	26.614286	248581900	23.857937
2007-11-08	26.667143	26.700001	23.967142	25.067142	472594500	22.471025
2007-11-09	24.450001	25.017143	23.601429	23.624287	381595200	21.177595
2007-11-12	23.611429	23.957144	21.518572	21.965714	442266300	19.690805
2007-11-13	22.978571	24.425714	21.965714	24.280001	434861700	21.765409
2007-11-14	25.308571	25.367144	23.391428	23.73	362292000	21.272366
2007-11-15	23.77	24.227142	22.9	23.471428	371852600	21.040573
2007-11-16	23.614286	23.860001	22.761429	23.77	345873500	21.308224
2007-11-19	23.728571	24.028572	23.157143	23.421429	288607200	20.995754
2007-11-20	23.667143	24.54143	23.361429	24.121429	385910700	21.623259
2007-11-21	23.691429	24.621429	23.524286	24.065714	304452400	21.573313
2007-11-23	24.571428	24.578571	24.25	24.505714	116439400	21.967743
2007-11-26	24.798571	25.324286	24.621429	24.648571	326438700	22.09581
2007-11-27	25.031429	25.112858	24.287144	24.972857	329257600	22.386503
2007-11-28	25.26	25.799999	25.049999	25.745714	287728000	23.079321
2007-11-29	25.632856	26.452858	25.592857	26.327143	262731700	23.600533
2007-11-30	26.762857	26.814285	25.671429	26.031429	296950500	23.335445
2007-12-03	25.98	26.305714	25.385714	25.551428	240367400	22.905157
2007-12-04	25.307142	25.842857	25.284286	25.687143	193449900	23.026812
2007-12-05	26.127142	26.571428	26.058571	26.5	223100500	23.755489
2007-12-06	26.598572	27.157143	26.588572	27.135714	224952700	24.325365
2007-12-07	27.219999	27.855715	26.862858	27.757143	266516600	24.882427
2007-12-10	27.655714	27.951429	27.527143	27.744286	180594400	24.870907
2007-12-11	27.821428	28.118572	26.77	26.934286	277731300	24.144796
2007-12-12	27.634285	27.782858	26.537144	27.265715	306415200	24.441898
2007-12-13	27.17	27.445715	26.831429	27.404285	216154400	24.566122
2007-12-14	27.195715	27.6	27.077143	27.198572	168578200	24.38171
2007-12-17	27.245714	27.521429	26.139999	26.342857	256173400	23.614616
2007-12-18	26.645714	26.761429	25.514286	26.139999	305650800	23.432772
2007-12-19	26.139999	26.377142	25.842857	26.16	206869600	23.450703
2007-12-20	26.49	26.832857	26.190001	26.744286	193514300	23.97447
2007-12-21	27.16	27.701429	27.127142	27.701429	248490200	24.832487
2007-12-24	27.861429	28.475714	27.827143	28.4	120050700	25.458712
2007-12-26	28.43	28.70857	28.117144	28.421429	175933100	25.477921
2007-12-27	28.421429	28.994286	28.257143	28.367144	198881900	25.429255
2007-12-28	28.655714	28.794285	28.125713	28.547142	174911800	25.590614
2007-12-31	28.5	28.642857	28.25	28.297142	134833300	25.366503
2008-01-02	28.467142	28.608572	27.507143	27.834286	269794700	24.951582
2008-01-03	27.915714	28.198572	27.527143	27.847143	210516600	24.963108
2008-01-04	27.35	27.571428	25.555714	25.721428	363958000	23.057547
2008-01-07	25.892857	26.228571	24.318571	25.377142	518048300	22.748917
2008-01-08	25.734285	26.065714	24.4	24.464285	380954000	21.930607
2008-01-09	24.471428	25.642857	24.042856	25.628571	453470500	22.974308
2008-01-10	25.368572	25.857143	25.058571	25.431429	370743800	22.797581
2008-01-11	25.142857	25.407143	24.285715	24.67	308071400	22.115015
2008-01-14	25.360001	25.631428	25.024286	25.540001	275112600	22.894909
2008-01-15	25.388571	25.602858	23.522858	24.148571	585819500	21.647589
2008-01-16	23.604286	24.144285	22.385714	22.805714	553461300	20.443804
2008-01-17	23.072857	23.622858	22.631428	22.984285	439464900	20.603884
2008-01-18	23.101429	23.678572	22.801428	23.051428	431085900	20.66407
2008-01-22	21.151428	22.854286	20.857143	22.234285	608688500	19.931557
2008-01-23	19.455715	20	18.02	19.867144	843242400	17.809572
2008-01-24	19.998571	20.1	18.858572	19.371429	501466700	17.365198
2008-01-25	19.855715	19.870001	18.515715	18.572857	388684800	16.64933
2008-01-28	18.308571	19.028572	18.064285	18.572857	368711000	16.64933
2008-01-29	18.735714	18.969999	18.435715	18.79143	274995700	16.845266
2008-01-30	18.767143	19.35	18.571428	18.882856	310762900	16.927225
2008-01-31	18.492857	19.521429	18.485714	19.337143	336418600	17.334463
2008-02-01	19.462856	19.512857	18.882856	19.107143	252686000	17.128279
2008-02-04	19.172857	19.414286	18.774286	18.807142	224808500	16.859354
2008-02-05	18.632856	19.142857	18.414286	18.48	285260500	16.56609
2008-02-06	18.690001	18.845715	17.395714	17.428572	393318100	15.623555
2008-02-07	17.138571	17.825714	16.752857	17.32	520832900	15.526225
2008-02-08	17.440001	17.957144	17.371429	17.925714	338993200	16.06921
2008-02-11	18.287144	18.568571	18.171429	18.492857	300358100	16.577616
2008-02-12	18.671429	18.714285	17.66	17.837143	306495000	15.989813
2008-02-13	18.097143	18.540001	17.947144	18.485714	242133500	16.571217
2008-02-14	18.485714	18.685715	18.144285	18.20857	238524300	16.322771
2008-02-15	18.038572	18.154285	17.722857	17.804285	225325100	15.960355
2008-02-19	17.998571	18.107143	17.348572	17.454287	251261500	15.646605
2008-02-20	17.457144	17.799999	17.382856	17.688572	241859800	15.856628
2008-02-21	18.007143	18.067142	17.265715	17.362858	234528700	15.564646
2008-02-22	17.497143	17.501429	16.552856	17.065714	382469500	15.298277
2008-02-25	16.941429	17.167143	16.665714	17.105715	314193600	15.334135
2008-02-26	16.805714	17.298571	16.491428	17.021429	376222000	15.258579
2008-02-27	16.889999	17.578571	16.870001	17.565714	368784500	15.746495
2008-02-28	18.171429	18.885714	17.967142	18.558571	404563600	16.63652
2008-02-29	18.469999	18.601429	17.828571	17.860001	313870200	16.0103
2008-03-03	17.777143	17.997143	16.857143	17.389999	398260800	15.588975
2008-03-04	17.427143	17.84	17.200001	17.802856	446345900	15.959074
2008-03-05	17.654285	17.877142	17.464285	17.784286	305459000	15.942432
2008-03-06	17.801428	18.214285	17.258572	17.275715	368424700	15.486528
2008-03-07	17.201429	17.568571	17.007143	17.464285	307615700	15.655568
2008-03-10	17.425714	17.637142	17.052856	17.098572	249897200	15.32773
2008-03-11	17.728571	18.211428	17.428572	18.192858	290985800	16.308683
2008-03-12	18.148571	18.382856	17.881428	18.004286	264907300	16.139641
2008-03-13	17.728571	18.5	17.571428	18.277143	315525700	16.384245
2008-03-14	18.554285	18.614286	17.742857	18.087143	289160200	16.213923
2008-03-17	17.507143	18.370001	17.507143	18.104286	268149700	16.229288
2008-03-18	18.454287	19	18.381428	18.974285	301280000	17.00918
2008-03-19	19.017143	19.184286	18.524286	18.524286	252634200	16.605791
2008-03-20	18.731428	19.04143	18.454287	19.038572	227196900	17.066809
2008-03-24	19.144285	20.121429	19.091429	19.932858	266730100	17.868479
2008-03-25	19.994286	20.442858	19.618572	20.139999	263097800	18.054167
2008-03-26	20.124287	20.82	20.091429	20.722857	295521100	18.576662
2008-03-27	20.707144	20.758572	19.998571	20.035715	249957400	17.960686
2008-03-28	20.257143	20.664286	20.228571	20.43	178652600	18.314135
2008-03-31	20.467142	20.815714	20.360001	20.5	192016300	18.376886
2008-04-01	20.9	21.379999	20.515715	21.361429	258141800	19.149105
2008-04-02	21.254286	21.6	20.835714	21.07	261242100	18.887856
2008-04-03	21.008572	21.947144	21	21.658571	262892000	19.415468
2008-04-04	21.741428	22.101429	21.535715	21.868572	213604300	19.60372
2008-04-07	22.304285	22.812857	22.158571	22.27	289581600	19.963577
2008-04-08	21.935715	22.35	21.76	21.834286	253573600	19.572987
2008-04-09	21.901428	21.984285	21.494286	21.634285	218349600	19.393694
2008-04-10	21.59	22.202858	21.514286	22.078571	238940800	19.791969
2008-04-11	21.817142	21.9	20.914286	21.02	302519000	18.843031
2008-04-14	20.967142	21.321428	20.648571	21.111429	211271900	18.924994
2008-04-15	21.342857	21.388571	20.817142	21.197144	174509300	19.001825
2008-04-16	21.674286	22.014286	21.517143	21.957144	198943500	19.683119
2008-04-17	22.024286	22.285715	21.907143	22.07	176066800	19.784285
2008-04-18	22.731428	23.18	22.625713	23.005714	256691400	20.623093
2008-04-21	23.172857	24.071428	23.108572	24.022858	259788200	21.534891
2008-04-22	23.914286	24	22.584286	22.885714	359893100	20.515516
2008-04-23	23.435715	23.548571	23.011429	23.27	376047700	20.86001
2008-04-24	23.620001	24.282858	22.741428	24.134285	424016600	21.634785
2008-04-25	24.385714	24.442858	23.774286	24.247143	248118500	21.73595
2008-04-28	24.25	24.821428	24.161428	24.605715	196803600	22.05739
2008-04-29	24.444286	25.094286	24.321428	25.007143	230869100	22.41724
2008-04-30	25.17	25.714285	24.702858	24.85	284881100	22.276373
2008-05-01	24.994286	25.714285	24.98	25.714285	225894200	23.051144
2008-05-02	25.741428	25.988571	25.507143	25.848572	251520500	23.171522
2008-05-05	25.988571	26.472857	25.864286	26.389999	213639300	23.656879
2008-05-06	26.379999	26.731428	26.025715	26.665714	229717600	23.904037
2008-05-07	26.578571	26.885714	25.79143	26.084286	289283400	23.38283
2008-05-08	26.252857	26.642857	26.152857	26.437143	224771400	23.699139
2008-05-09	26.165714	26.321428	25.91	26.207144	168268100	23.492966
2008-05-12	26.45857	26.981428	26.121429	26.879999	204640800	24.096132
2008-05-13	26.944286	27.35	26.837143	27.137142	205809100	24.326643
2008-05-14	27.318571	27.462856	26.51	26.608572	229205900	23.852816
2008-05-15	26.687143	27.128571	26.314285	27.104286	218302000	24.297192
2008-05-16	27.158571	27.185715	26.714285	26.802856	191442300	24.026981
2008-05-19	26.837143	26.955715	25.9	26.228571	236455100	23.512171
2008-05-20	25.974285	26.594286	25.731428	26.557142	242462500	23.806713
2008-05-21	26.524286	26.85	25.178572	25.455715	289414300	22.819353
2008-05-22	25.608572	25.904285	24.571428	25.292856	301683900	22.673365
2008-05-23	25.824286	25.998571	25.4	25.881428	226729300	23.200979
2008-05-27	26.107143	26.632856	25.977142	26.632856	197476300	23.874584
2008-05-28	26.772858	26.85	26.245714	26.715714	185994900	23.948858
2008-05-29	26.68	26.885714	26.5	26.67	161796600	23.907881
2008-05-30	26.778572	27.077143	26.768572	26.964285	152546100	24.171686
2008-06-02	26.942858	27.092857	26.361429	26.585714	169960000	23.832323
2008-06-03	26.694286	26.885714	26.048571	26.481428	187630100	23.73884
2008-06-04	26.288572	26.727142	26.175714	26.455715	181745900	23.715788
2008-06-05	26.620001	27.120001	26.528572	27.061428	188861400	24.25877
2008-06-06	26.857143	27.135714	26.507143	26.52	241605700	23.773415
2008-06-09	26.398571	26.42	25.107143	25.944286	472098200	23.257326
2008-06-10	25.787144	26.682858	25.574286	26.52	285235300	23.773415
2008-06-11	26.334286	26.571428	25.655714	25.83	240387700	23.154871
2008-06-12	25.927143	26.085714	24.457144	24.751429	327083400	22.188009
2008-06-13	24.52	24.879999	23.615715	24.624287	336489300	22.074038
2008-06-16	24.471428	25.414286	24.152857	25.262857	262932600	22.646473
2008-06-17	25.442858	25.998571	25.344286	25.918571	224914200	23.234276
2008-06-18	25.874287	26.028572	25.335714	25.535715	202867000	22.891071
2008-06-19	25.507143	26.048571	25.257143	25.842857	197987300	23.166399
2008-06-20	25.621429	25.857143	25	25.038572	222091800	22.445415
2008-06-23	24.962856	25.125713	24.508572	24.737143	161445200	22.175205
2008-06-24	24.624287	25.111429	24.518572	24.75	155486800	22.186728
2008-06-25	24.944286	25.547142	24.84	25.341429	161112700	22.716906
2008-06-26	24.867144	24.977142	24.001429	24.037144	217402500	21.547697
2008-06-27	23.787144	24.367144	23.450001	24.298571	260562400	21.782051
2008-06-30	24.312857	24.571428	23.802856	23.92	171049200	21.442688
2008-07-01	23.461428	24.959999	23.428572	24.954287	277820200	22.369856
2008-07-02	25.028572	25.35	24.025715	24.025715	209379800	21.537457
2008-07-03	24.227142	24.595715	23.678572	24.302856	130840500	21.785892
2008-07-07	24.737143	25.304285	24.557142	25.022858	205097900	22.431334
2008-07-08	25.057142	25.671429	24.677143	25.65	222087600	22.993515
2008-07-09	25.742857	25.844286	24.877142	24.892857	223944000	22.314789
2008-07-10	24.988571	25.334286	24.481428	25.232857	210172200	22.619579
2008-07-11	25.067142	25.301428	24.428572	24.654285	232502900	22.100929
2008-07-14	25.605715	25.614286	24.725714	24.84	221513600	22.267403
2008-07-15	24.639999	24.82	23.77	24.234285	260010800	21.724428
2008-07-16	24.314285	24.704287	24.085714	24.687143	186947600	22.130381
2008-07-17	24.871429	24.997143	24.484285	24.544285	189381500	22.002316
2008-07-18	24.074286	24.235714	23.571428	23.592857	217103600	21.149431
2008-07-21	23.842857	23.928572	23.017143	23.755714	340117400	21.295416
2008-07-22	21.285715	23.251429	20.932858	23.145714	469898100	20.748589
2008-07-23	23.57	24.052856	23.08	23.751429	265442100	21.291571
2008-07-24	23.474285	23.608572	22.635714	22.718571	209904800	20.365686
2008-07-25	22.914286	23.285715	22.664286	23.16	158409300	20.7614
2008-07-28	23.191429	23.209999	22.002857	22.057142	195178200	19.77276
2008-07-29	22.201429	22.778572	21.950001	22.440001	171017700	20.115971
2008-07-30	22.540001	22.927143	22.297142	22.84	181295800	20.474541
2008-07-31	22.505714	23.171429	22.425714	22.707144	159374600	20.355446
2008-08-01	22.842857	22.855715	22.25	22.379999	136159800	20.062181
2008-08-04	22.371429	22.557142	21.844286	21.889999	148131900	19.622931
2008-08-05	22.202858	22.971428	22.117144	22.948572	172092900	20.571869
2008-08-06	22.852858	23.914286	22.571428	23.455715	197852200	21.026485
2008-08-07	23.244286	23.735714	23.071428	23.367144	168093100	20.94709
2008-08-08	23.408571	24.235714	23.392857	24.221428	178499300	21.712898
2008-08-11	24.295713	25.214285	24.238571	24.794285	222826100	22.226427
2008-08-12	24.788572	25.612858	24.787144	25.247143	209069700	22.632383
2008-08-13	25.425714	25.714285	25.128571	25.614286	210586600	22.961504
2008-08-14	25.475714	25.778572	25.405714	25.617144	177825200	22.964066
2008-08-15	25.577143	25.678572	25.007143	25.105715	177062900	22.505606
2008-08-18	25.081429	25.401428	24.831429	25.055714	138003600	22.460779
2008-08-19	24.934286	25.295713	24.544285	24.790001	154051100	22.222586
2008-08-20	24.967142	25.277143	24.801428	25.120001	126737800	22.518414
2008-08-21	24.924286	25.064285	24.555714	24.898571	134936200	22.319912
2008-08-22	25.117144	25.357143	25.081429	25.255714	109902800	22.64007
2008-08-25	25.164286	25.175714	24.522858	24.65	121106300	22.097084
2008-08-26	24.68	24.982857	24.658571	24.805714	111387500	22.236671
2008-08-27	24.758572	25.108572	24.598572	24.952858	119445200	22.368578
2008-08-28	25.040001	25.178572	24.678572	24.82	107846200	22.249474
2008-08-29	24.70857	24.785715	24.148571	24.218571	149822400	21.710335
2008-09-02	24.628571	24.785715	23.571428	23.741428	195190800	21.282612
2008-09-03	23.834286	24.097143	23.428572	23.851429	183708700	21.38122
2008-09-04	23.694286	23.987143	22.972857	23.031429	185846500	20.646141
2008-09-05	22.655714	23.200001	22.521429	22.882856	196721000	20.512957
2008-09-08	23.51	23.555714	21.637142	22.559999	261494800	20.223536
2008-09-09	22.408571	22.851429	21.398571	21.668571	311256400	19.424435
2008-09-10	21.76	22.141428	21.257143	21.658571	243285700	19.415468
2008-09-11	21.168571	21.855715	20.857143	21.807142	242783800	19.548651
2008-09-12	21.558571	21.558571	20.928572	21.277143	198256800	19.07354
2008-09-15	20.290001	21.098572	20.051428	20.051428	230158600	17.974771
2008-09-16	19.122858	20.357143	18.878571	19.982857	299959100	17.913298
2008-09-17	19.784286	19.787144	18.261429	18.261429	300113800	16.370153
2008-09-18	18.652857	19.347143	17.24	19.155714	419063400	17.171816
2008-09-19	20.371429	20.6	19.472857	20.129999	357718900	18.045204
2008-09-22	19.991428	20.035715	18.665714	18.721428	214178300	16.782516
2008-09-23	18.835714	19.4	18.094286	18.120001	320091100	16.243372
2008-09-24	18.181429	18.707144	17.878571	18.387142	261753800	16.482847
2008-09-25	18.542856	19.255714	18.360001	18.847143	251511400	16.895208
2008-09-26	17.844286	18.542856	17.571428	18.32	281612800	16.422655
2008-09-29	17.088572	17.097143	14.37	15.037143	655514300	13.479796
2008-09-30	15.464286	16.428572	15.185715	16.237143	406670600	14.555517
2008-10-01	15.988571	16.051428	15.341429	15.588572	324121000	13.974115
2008-10-02	15.43	15.541429	14.285714	14.3	402341100	12.818999
2008-10-03	14.857142	15.214286	13.521428	13.867143	573599600	12.430972
2008-10-06	13.137143	14.111428	12.505714	14.02	526854300	12.567997
2008-10-07	14.354285	14.5	12.707143	12.737143	469693000	11.417999
2008-10-08	12.272857	13.761429	12.24	12.827143	551935300	11.498679
2008-10-09	13.335714	13.685715	12.371428	12.677143	404345900	11.364215
2008-10-10	12.242857	14.285714	12.142858	13.828571	554824900	12.396394
2008-10-13	14.935715	15.79	14.431429	15.751429	384769000	14.120109
2008-10-14	16.608572	16.628571	14.734285	14.868571	495248600	13.328683
2008-10-15	14.834286	15.285714	13.984285	13.992857	396043900	12.543667
2008-10-16	14.252857	14.775714	13.105714	14.555715	495130300	13.04823
2008-10-17	14.228572	14.577143	12.27	13.914286	440556900	12.473231
2008-10-20	14.254286	14.29	13.377143	14.062857	387292500	12.606419
2008-10-21	13.85	13.985714	13.022857	13.07	548415000	11.716386
2008-10-22	13.91	14.464286	13.275714	13.838572	562202200	12.405358
2008-10-23	13.787143	14.178572	13.128572	14.032857	418857600	12.579522
2008-10-24	12.904285	13.985714	12.872857	13.768572	397514600	12.342608
2008-10-27	13.581429	13.947143	13.122857	13.155714	302192800	11.793222
2008-10-28	13.632857	14.357142	13.195714	14.272857	408533300	12.794667
2008-10-29	14.408571	15.648571	14.277143	14.935715	487744600	13.388875
2008-10-30	15.461429	16.027143	15.372857	15.862857	409522400	14.219996
2008-10-31	15.342857	15.825714	15.02	15.37	414939000	13.778181
2008-11-03	15.132857	15.585714	14.98	15.28	264484500	13.697503
2008-11-04	15.712857	15.97	15.238571	15.855714	349670300	14.213594
2008-11-05	15.558572	15.674286	14.712857	14.757143	314113800	13.228795
2008-11-06	14.435715	14.682858	14	14.157143	329768600	12.690936
2008-11-07	14.177143	14.264286	13.674286	14.034286	273813400	12.580805
2008-11-10	14.31	14.342857	13.5	13.697143	280955500	12.278578
2008-11-11	13.544286	13.881429	13.18	13.538571	306134500	12.136429
2008-11-12	13.204286	13.32	12.858571	12.874286	294744100	11.54094
2008-11-13	12.838572	13.777143	12.288571	13.777143	463521800	12.350292
2008-11-14	13.394286	13.427143	12.857142	12.891429	351316700	11.556306
2008-11-17	12.64	12.935715	12.465714	12.591429	290631600	11.287378
2008-11-18	12.805715	12.998571	12.408571	12.844286	302423800	11.514046
2008-11-19	12.777143	13.082857	12.315714	12.327143	292975200	11.050465
2008-11-20	12.177143	12.35	11.428572	11.498571	429203600	10.307706
2008-11-21	11.704286	12.017143	11.305715	11.797143	392317800	10.575354
2008-11-24	12.172857	13.541429	12.12	13.278571	360564400	11.903357
2008-11-25	13.518572	13.53	12.594286	12.971429	308823200	11.628022
2008-11-26	12.845715	13.607142	12.835714	13.571428	224959000	12.165884
2008-11-28	13.528571	13.537143	13.122857	13.238571	74443600	11.867497
2008-12-01	13.042857	13.181429	12.702857	12.704286	230941900	11.388547
2008-12-02	12.861428	13.235714	12.357142	13.21	287180600	11.841888
2008-12-03	12.771428	13.747143	12.685715	13.7	334670000	12.281137
2008-12-04	13.49	13.601429	12.722857	13.058572	272842500	11.706142
2008-12-05	12.907143	13.498571	12.694285	13.428572	260948800	12.03782
2008-12-08	13.897142	14.4	13.685715	14.245714	296285500	12.770334
2008-12-09	14.005714	14.8	13.887143	14.294286	300874000	12.813874
2008-12-10	13.981428	14.212857	13.785714	14.03	234511900	12.576962
2008-12-11	13.907143	14.462857	13.547143	13.571428	260154300	12.165884
2008-12-12	13.257143	14.142858	13.218572	14.038571	260293600	12.584647
[truncated: 2,301 more rows]
