# Supplementary material for: An Empirical Study of Machine Learning Algorithms for Stock Daily Trading Strategy
Source: Hindawi journal article supplement (doi:10.1155/2019/7816154), 2019-01-01
Supplement: f1 [file 7816154.f1.zip › Optional Supplementary Materials(Data, code, and results)/SPICS/AAPL_DatasetNew.csv]

	ATR	ADX	OBV	WR	RSI	CMF	BandPer	BandWid	CO	DIS	EOM	FI	MAO	MFI	MI	MOM	NCO	PO	PSY	RMI	ROC	SROC	SONAR	SONSIG	TRIX	VMA	VOS	VROC	Return	Sigma	CCI	RSV	Kvalue	Dvalue	Jvalue	MACD	AD	VOLA	NBIAS	Ret	SMA_5	SMA_10	EMA_5	EMA_10	Label
2010-01-22	0.135997183853052	0.140266480250311	0.771246340169254	0.965175535365305	0.314151839536784	0.390405802666381	0.0599482863632527	0.0709352668172481	0.364976945370872	0.424694407208625	0.624006869814799	0.633331231049104	0.509177800555806	0.489263214443027	0.0373451426150344	0.377823512755801	0.426713300015138	0.533573391260015	0.222222222222222	0.666203065809208	0.475282709731827	0.310196068667786	0.501267961691249	0.494557155426332	0.638284762220498	0.256109509613988	0.526625970864868	0.649228326033054	0.472381614688625	0.224316493780496	0.0985135141307995	0.0348244646346951	0.354923269585695	0.520105211900057	0.198520347562989	0.651389380226482	0.711870545098639	0.485615858963153	0.348784280033833	0.447405975099349	0.145208661277366	0.147141877171453	0.144176458488779	0.146336620528854	1
2010-01-25	0.142070320505543	0.159020730150264	0.780106616071682	0.683683908259686	0.3989007909261	0.402144017263443	0.242941565834304	0.0676906761929428	0.365209176525022	0.471388948131529	0.628720572118234	0.68584568009679	0.500704087983452	0.520459571285914	0.0346157095571299	0.428177800706167	0.455678149580774	0.540669929898803	0.222222222222222	0.665991867994401	0.528973481310299	0.320717998424453	0.50065096053369	0.495494017451332	0.626050400443326	0.27610775508086	0.603137462613833	0.617585108481332	0.486966051178637	0.23688790831886	0.219368997054774	0.316316091740314	0.330631758823173	0.453410419993535	0.234728909790978	0.641092933929013	0.715142629913745	0.467837562131042	0.444912319566861	0.683679468816148	0.144795569068555	0.146493379100827	0.143478609392147	0.145719885964922	1
2010-01-26	0.160051624396587	0.138853767546114	0.795629855209785	0.5318310464362	0.440368352760635	0.30181274860307	0.348004503471514	0.0670176488165335	0.316181415411867	0.498146003488405	0.630762300710498	0.782011306418681	0.493876248788652	0.580436440502049	0.031572829604599	0.465523703690583	0.466494114261342	0.508707355432293	0.333333333333333	0.665592547398377	0.549001709350955	0.322648842729206	0.502156819858124	0.496566144937051	0.615628686566745	0.314045835211974	0.777365248045903	0.695262009083146	0.502921406660539	0.242707072825999	0.39248567584131	0.4681689535638	0.369046988000719	0.422256760059108	0.349108789162567	0.637646004037135	0.706947203631614	0.526478285938207	0.488485236113362	0.645489223028708	0.143481165696132	0.146189869897985	0.143705405878848	0.145595240716647	1
2010-01-27	0.173491572007524	0.130126540446444	0.809951368781529	0.429180972685317	0.467654289664012	0.39112425378895	0.433548512312086	0.0697868992879532	0.376071462776982	0.516975123373812	0.627565372989735	0.766529015839136	0.485765148182827	0.520695628694743	0.0276631603441025	0.458664084932663	0.468285833233005	0.49063558312654	0.444444444444444	0.663058329607721	0.552469102827112	0.320059286077163	0.502986770442032	0.497601667974842	0.607863570710465	0.343980496291622	0.853575947750651	0.696479929237967	0.535499673709595	0.241070395867479	0.345699867969601	0.570819027314683	0.431572324921543	0.42315049802443	0.470451590211782	0.638043291226777	0.716704303629765	0.615279007473669	0.536273106159564	0.631274820662347	0.142925071224177	0.146201517600235	0.144324404073239	0.145750102176236	0
2010-01-28	0.184416155562477	0.122022686711038	0.800194815399919	0.883691345323534	0.354843395455163	0.346851808622831	0.177798443724441	0.0839006047645282	0.333066137465252	0.444952267155458	0.628113567700527	0.663841278334263	0.476872327304031	0.491701995550244	0.0231136413091917	0.405846872047379	0.445989856140436	0.475815565142185	0.333333333333333	0.665826907812307	0.510431716000449	0.33588517182111	0.499839110330673	0.497755684537745	0.597576785754479	0.364204300787669	0.829039452384142	0.645549681473795	0.48472431309597	0.271874052196269	0.247235512940572	0.116308654676466	0.309804133790758	0.38155789972644	0.284201575601244	0.623618569004253	0.705960228480549	0.481933440260193	0.436022198936144	0.473868515818963	0.141656888937068	0.145374696129471	0.14266575883529	0.144739562496933	0
2010-01-29	0.202847495384224	0.135866950213184	0.789835909358018	0.922193709441253	0.280103319137359	0.263703704222498	0.0849907351786091	0.117855649785886	0.259345884826767	0.388728655350494	0.625883146825529	0.581698123132906	0.467830782452303	0.426981505264506	0.0206210050095001	0.377488072951938	0.429931616633542	0.489169238808665	0.333333333333333	0.66630332729296	0.478262666611178	0.362779809625894	0.493717358354299	0.49656728191528	0.582558735096626	0.387359672893534	0.81215500386672	0.672061392892145	0.429506362838782	0.287376204799984	0.181413017404881	0.0778062905587465	0.214779057775721	0.320906632227723	0.174275110190088	0.599867358348562	0.696338887540467	0.657050386671378	0.363782275156181	0.489881418110849	0.140835025480349	0.144110445865687	0.139816627985468	0.142955568720959	1
2010-02-01	0.203154349780276	0.14872233775089	0.796070416527505	0.819306068187138	0.320484740362397	0.316067239538265	0.223131341617975	0.146001757400726	0.272851968787809	0.419291185534089	0.627759526817798	0.66206202623187	0.458429873047106	0.419194216989457	0.017478935286279	0.336910772470184	0.429068932330891	0.475834219013105	0.444444444444444	0.666058568314309	0.47800937117316	0.37665991989415	0.48838607433426	0.49447430564399	0.567028318827396	0.398396748146788	0.733653041790232	0.556421827410111	0.458735734747342	0.294302694182056	0.226523548376087	0.180693931812862	0.188429625641308	0.271343296318055	0.18493102709913	0.58593057933829	0.700156585254641	0.514609736926827	0.413185604642018	0.644794023233173	0.139630384214768	0.143295268118745	0.138561018978309	0.141849419503847	1
2010-02-02	0.202126418340618	0.159758890356564	0.801876467630802	0.775760050504533	0.337621134550672	0.333252452799861	0.282275907500422	0.159987249898882	0.330802913036901	0.437150997918532	0.629104572762913	0.727226650851503	0.450886033742271	0.468626662003543	0.015669439086396	0.36610467346727	0.43686599420402	0.472683144245191	0.444444444444444	0.665777568481706	0.492629162655369	0.38367415313709	0.481468499124883	0.491317799659983	0.552804278749617	0.404078565318838	0.660678390844447	0.487282472826102	0.480832323576125	0.295331808492234	0.286731588170069	0.224239949495467	0.186523426262741	0.237640640896805	0.223537374253654	0.577286931816792	0.705471951075177	0.339506400267168	0.449419799272602	0.620318560849586	0.138174430178441	0.14189928185374	0.13799643218766	0.141093995563704	1
2010-02-03	0.19997849484661	0.15492741799607	0.806992333162223	0.645898643081836	0.387975845012648	0.364079698837415	0.365588489333579	0.160631405675129	0.396657052993909	0.474111045781708	0.630020158472262	0.727702057180282	0.449353052582866	0.467721526623962	0.0151765512988127	0.41472980950491	0.459659301102393	0.460538852580156	0.555555555555556	0.665717443613371	0.535389478739859	0.380495385356478	0.475357928743766	0.487483374712504	0.542133553878368	0.404451309195389	0.587684727635291	0.456095306774348	0.484820511152966	0.297471251018983	0.345144715333232	0.354101356918164	0.231953594264994	0.230912169817833	0.320972251736336	0.57682997784163	0.710000571514332	0.300034347009979	0.520309842248312	0.65472359856542	0.13692501491521	0.14098948343434	0.13843263883556	0.14092207489001	0
2010-02-04	0.211051042677749	0.156713196313761	0.800693179293697	0.922578571802557	0.308020577438151	0.354505259476169	0.251974230896105	0.17034519810909	0.378666316196878	0.41725267932646	0.62797208998043	0.686271108281846	0.439499980436686	0.424359060156057	0.0153426774482301	0.435189580402549	0.405612069952924	0.463485656659768	0.555555555555556	0.666105440724706	0.434528812545805	0.392813905898646	0.468112734974074	0.48286351587809	0.530633429004177	0.410157540547087	0.547457078187449	0.572675788211713	0.445913318043893	0.314439080982209	0.309345844376303	0.0774214281974429	0.162740293272327	0.202446531972237	0.221168030075405	0.564441983100736	0.702792303069474	0.283055797991615	0.447521898713477	0.490641956278777	0.135879269063411	0.139823492400143	0.136992139738808	0.139830847531946	1
2010-02-05	0.209864564788277	0.161499301313572	0.807762669466829	0.791175608573012	0.35810326528953	0.402067053809154	0.33911604311068	0.179884088971057	0.429149047303921	0.454799263526094	0.628141835831721	0.69176425652166	0.432460945366856	0.417962966366558	0.015697157577095	0.42223377941073	0.427907580701645	0.485458853234539	0.666666666666667	0.665455748451493	0.476279079810468	0.393287250627821	0.461723804844961	0.477798768686885	0.521316923702913	0.420520115773417	0.527452149352222	0.529595742450874	0.49024957839904	0.32030606169422	0.322143581025505	0.208824391426988	0.163853436969868	0.183855105472782	0.246704311686596	0.561275726551628	0.710236526740059	0.193316373763516	0.512634171252469	0.656372238586468	0.136370363019344	0.1396568172706	0.136854051017066	0.139389474795442	0
2010-02-08	0.200789054979532	0.157105824898631	0.803786303853034	0.842811559471917	0.343053674954509	0.340800007482765	0.329743008236002	0.182002503606816	0.417649359979628	0.450377407084229	0.630122100948056	0.723683786202045	0.428322884448714	0.404631225257963	0.0164243437835402	0.392400860607655	0.435605181795211	0.50382763280568	0.555555555555556	0.666363144975331	0.489592107858607	0.395366946521509	0.455678573568082	0.472451750002393	0.513403853976777	0.42137150197455	0.453090236776664	0.362207728775172	0.424526832869185	0.277263709721008	0.35681061941948	0.157188440528083	0.146026129300621	0.165284281924113	0.235116893988961	0.557091874035814	0.705266025439442	0.183878595355054	0.485515553331998	0.581664813639269	0.136282257600133	0.139005400738423	0.136438883849037	0.138850950535183	1
2010-02-09	0.194888655486011	0.153026168227612	0.809048154062046	0.749697320880552	0.374573961944908	0.352581805732636	0.379267580631482	0.180738199299405	0.418200390051053	0.4755086372252	0.628823534970578	0.713112143136374	0.43195776759366	0.403332171839775	0.017360262968448	0.394139483702678	0.476713107000601	0.528636722605757	0.555555555555556	0.666131138513933	0.567109178549353	0.391041452486888	0.449682604149679	0.466889468721978	0.508167643648987	0.426110418647866	0.416413785826034	0.459919926127151	0.458042934202435	0.280858382744774	0.378374468459833	0.250302679119448	0.167627149324828	0.160387731583671	0.283577280116908	0.558164367551776	0.705597484915826	0.0986725713293128	0.514912497760345	0.63503127666364	0.136329923517323	0.138295762745406	0.136661249257898	0.138684392447169	0
2010-02-10	0.187196990412637	0.150591790837783	0.80596895054197	0.793252599830073	0.36113710443007	0.353545281305296	0.372028710496962	0.182774863779189	0.414000850128007	0.471284595971828	0.628609868134799	0.71473889741444	0.432500034708033	0.411825827361139	0.0188576164017089	0.447020657042419	0.455511949814977	0.539365720415198	0.444444444444444	0.665987737763245	0.52674012927318	0.388993163397593	0.443653055390776	0.461147782823759	0.504573092847247	0.419887524163151	0.340828474676947	0.346556400528891	0.47326319996382	0.277898668984173	0.372244750652337	0.206747400169927	0.166364410078263	0.156685869661613	0.285754580154857	0.557824470551804	0.704510439615437	0.0419316384698918	0.499686710896698	0.585968668126539	0.135736278079205	0.137367042351233	0.13655148094194	0.138406457277231	1
2010-02-11	0.177684704609291	0.135443455622738	0.810544549385853	0.648750139459662	0.416588413912444	0.338281245711208	0.44574652518248	0.179737529884216	0.441710506291207	0.509449898807138	0.629517655065253	0.719019733058175	0.432486456274075	0.46549318168441	0.0212437830624338	0.529899529206015	0.457768121351167	0.572420396341896	0.555555555555556	0.679604836690982	0.531779089056386	0.378436743783901	0.440478854467683	0.455874345736655	0.504363465129994	0.418345076724059	0.310922707319583	0.351818457251206	0.56046574508345	0.240376860483455	0.42150759479441	0.351249860540338	0.217488790441848	0.171930773207747	0.366737770280276	0.564549581754019	0.708292712355638	0.0545491621448409	0.558336927704564	0.657685715239646	0.136692466912555	0.137321914467266	0.137334302953934	0.138649039496163	1
2010-02-12	0.17715470811358	0.11919213050186	0.815994147390237	0.57914395447528	0.442255068171249	0.379128016328486	0.486912955702521	0.171026315223277	0.483422625451142	0.529432281159584	0.629666908386889	0.729110593936129	0.430642934511556	0.446970765121526	0.02373523450192	0.521809851925081	0.457004897828079	0.575946024737874	0.666666666666667	0.662636222047218	0.53076294262709	0.365890991301571	0.438270412908664	0.451182426455704	0.507421059567848	0.424525674031292	0.306922886727608	0.348679677589206	0.536931651065118	0.226126698015448	0.470489168798258	0.42085604552472	0.276603598551405	0.202575257758614	0.444025285771923	0.5734900230177	0.712573730692126	0.0395282274975176	0.5630922765629	0.628815300732978	0.13740311215162	0.137927472221307	0.138268516072138	0.139073904901156	1
2010-02-16	0.160517913056747	0.111133999396344	0.820514807015636	0.359308643306864	0.486200163069619	0.446196281906467	0.552263641143763	0.16450694826149	0.527369743030337	0.558592592572814	0.629721915133815	0.727038006185975	0.435881876510977	0.376904912596003	0.0267229570148468	0.53601061175847	0.495525029205431	0.598944267393397	0.666666666666667	0.662350259928214	0.602834240995548	0.34931352350435	0.43678850650716	0.447111385198349	0.514167966932904	0.423128078874639	0.283131258144742	0.188539471062064	0.538139050573209	0.226769707257088	0.600221094334977	0.640691356693136	0.395070997762963	0.264049728664753	0.598833009681616	0.586356761194922	0.716987179900148	0.0326300333793954	0.589634561983271	0.64831266044434	0.138743515730451	0.138558506695415	0.139619539874163	0.139821345493275	0
2010-02-17	0.144970938687774	0.106476483136714	0.816886583779992	0.226713805685743	0.472290700017484	0.396209541641682	0.550643631167873	0.144998545571964	0.537699725258053	0.556586186281601	0.628863439029164	0.717115844536979	0.446355983235601	0.429062491532907	0.0292805371204897	0.503313945133703	0.51669284280593	0.612719176060502	0.555555555555556	0.664916078947722	0.644148075562252	0.33847339703678	0.43577107782089	0.443636563025395	0.522533468734463	0.414974909154371	0.243105084858442	0.158693914922783	0.520646083033051	0.224465815975065	0.617082234608676	0.773286194314257	0.521733232043352	0.348916747828993	0.740304026374205	0.595334383259994	0.716889101350304	0.0492728513078287	0.553475564563871	0.589879013482838	0.139662153597638	0.139045428276924	0.140315267234027	0.140320358011162	1
2010-02-18	0.134087237549206	0.102151646609915	0.820401972103774	0.109400713295241	0.478242689199773	0.417407010874669	0.582253676820696	0.120622494869355	0.545310302207634	0.564285498712084	0.628738815051433	0.707262674950255	0.454481253176547	0.465547976266133	0.0328075387099627	0.563200419783075	0.509095194743766	0.639820053926513	0.555555555555556	0.669616204630269	0.629103680645187	0.329377129928866	0.435783738498628	0.44085941790034	0.531779701643664	0.409717541048256	0.207989751342718	0.234139262961829	0.576212831986767	0.183035371456576	0.606819036246954	0.890599286704759	0.64836304397675	0.449367565954917	0.862133941105751	0.603325720967444	0.718545070748093	0.0410097063067642	0.54154258108664	0.608379990710867	0.140790236820081	0.139314732087349	0.140870723126193	0.140778954251491	0
2010-02-19	0.1139170991086	0.0981357269778886	0.816947738579551	0.200292415353016	0.455564471769357	0.434337348521373	0.569001725897302	0.101768883356838	0.52537836619659	0.555568239699021	0.628795130776534	0.706247813156068	0.460551822011612	0.511509110900156	0.0358825842921752	0.525938498100423	0.501165302597958	0.631248704952248	0.555555555555556	0.667907808492075	0.613954144295103	0.325202085069534	0.434355671573307	0.438331731343818	0.540480930601425	0.40436694809692	0.178440079144385	0.217548544256092	0.614891800825251	0.14106627629139	0.562907807345848	0.799707584646984	0.700096298947664	0.534258543310208	0.856814814005326	0.607589141412915	0.716408935397418	0.0185449596112984	0.50466672170401	0.583650039955865	0.141223561186734	0.140014909377154	0.140937192540482	0.140987350283374	0
2010-02-22	0.111073630391797	0.0844977015392534	0.813700574694489	0.288344860893682	0.43288954474363	0.483754410012214	0.532930491312692	0.101465458781013	0.502828225895828	0.542648823320582	0.62823128070826	0.701931912122289	0.464723564296017	0.533687395723284	0.0386924081757632	0.526961191069405	0.485837098476975	0.620014570773488	0.444444444444444	0.668406987401051	0.584604278395162	0.324691251055834	0.43302715522503	0.436024940849431	0.547772972558742	0.390726885880971	0.149638137025606	0.313063331626496	0.589036817633758	0.139782358115507	0.510380005904806	0.711655139106318	0.702919573925406	0.591830694347415	0.790017958267673	0.608907598894659	0.715297847662654	0.0225193473004131	0.480660721538277	0.583684053452613	0.14122934389792	0.140375918240219	0.140680096162586	0.14099236859595	0
2010-02-23	0.116556012547623	0.0819489728647739	0.808919209853917	0.525032976486857	0.374973283982096	0.43921885664472	0.439373455490438	0.0990275754859398	0.46602046324262	0.514092503587258	0.627672723187561	0.692561564848417	0.4722880291882	0.452061817520504	0.0397847483546124	0.484998110057807	0.498511054771593	0.584222907500398	0.444444444444444	0.673471014773655	0.609566168687539	0.331396475359164	0.431848928428956	0.433927067490381	0.552049736716765	0.377103462628222	0.170815629854424	0.411194371150237	0.56000723338563	0.149670898329731	0.427147093325974	0.474967023513143	0.619683597552364	0.601373770849959	0.614998602852028	0.604213386996016	0.711987741215907	0.061085664104503	0.436776190127388	0.551060676336023	0.140313593438697	0.140589901432601	0.139698499567925	0.140551638097771	1
2010-02-24	0.112929348425642	0.0795822962384694	0.812748380264967	0.271441867321759	0.442725199273202	0.521059687188191	0.569044032209457	0.0818951357760342	0.469372906710429	0.550208710608167	0.629181357697915	0.706836582231669	0.477674091588746	0.441187618445843	0.0411602949130587	0.520878391301695	0.499141448022001	0.565126988500778	0.444444444444444	0.672534028916519	0.610201275593163	0.328507434750692	0.428868024198118	0.431610095214352	0.55627483179029	0.338045673576331	0.163005160786413	0.390733837416295	0.561373834381422	0.150805934799614	0.47677002447665	0.728558132678241	0.655389787983149	0.620106769250481	0.661400852942369	0.607026654513955	0.714878924768366	0.0828762132190921	0.500105775612562	0.657909475786369	0.140040594655083	0.14091523970483	0.139912160907878	0.140667644632771	1
2010-02-25	0.110993426393837	0.0700521233968413	0.81827826867806	0.177046054868034	0.466521217657226	0.489011750251891	0.641193675455938	0.0690706632094945	0.505254411135932	0.56554365425303	0.62888298897018	0.725617116722937	0.487482121721566	0.535389758248528	0.0426682110235469	0.503459697836943	0.508033277986091	0.544833334770888	0.555555555555556	0.66776416752315	0.627267504210171	0.323388520422297	0.427714215934873	0.429509308222352	0.561017336330583	0.308681946640511	0.206547826138273	0.424887080233973	0.61632116332076	0.09938325058404	0.48320584170135	0.822953945131966	0.713140688388272	0.652604104006717	0.733689246711432	0.611739484441809	0.720124290131858	0.142658037868604	0.522518878988931	0.622972570270141	0.13990625912741	0.141415990304156	0.140377724884693	0.140939968453158	1
2010-02-26	0.106943017099991	0.0614725523362748	0.822497321305711	0.0524117643134927	0.511493125577771	0.615534877423547	0.725651779995758	0.0746579987819535	0.540054136766423	0.587509276781152	0.630119173267631	0.723432227731047	0.495746846456304	0.631517841497103	0.0446358914072459	0.510046469097948	0.509857900107023	0.544759155686014	0.555555555555556	0.667801506845275	0.630141797873665	0.314035087370591	0.42880705803523	0.428062825495665	0.567267192936049	0.290186883769667	0.206241956673507	0.342223534547796	0.610165504281246	0.0945163078861351	0.582007226233841	0.947588235686507	0.796462472095792	0.703137080609728	0.83340439143879	0.620107748894362	0.723795177832056	0.115693641942477	0.559049493806234	0.641988327679523	0.140332353695213	0.141849052487612	0.141319852365283	0.141509639378271	1
2010-03-01	0.10806288027807	0.0706828930326137	0.827070825009906	0.0354875303879966	0.578329200438625	0.755520835012278	0.812713191359307	0.0915344682783567	0.577465001642736	0.620082427706546	0.630348670840119	0.733493083736648	0.505235139715767	0.636856916384086	0.0466394960474816	0.519516044623074	0.527907039224621	0.56446606157317	0.555555555555556	0.667577090974071	0.663682547553405	0.298166712696252	0.434863520592643	0.428203266603676	0.576455955150639	0.2708638380992	0.217522155939652	0.482753269886016	0.646455526372365	0.101503970339208	0.677352268427183	0.964512469612003	0.858096648045426	0.758179820127604	0.884975467391114	0.634238885958703	0.728354302498883	0.101880037744409	0.607665505772536	0.667151989648839	0.141570205791859	0.142475721488851	0.143001681856338	0.142554287800871	0
2010-03-02	0.10790817147715	0.0843857793914195	0.822360531963416	0.125988986687013	0.575250234902966	0.7081319310681	0.754738504757773	0.105040140067269	0.569168656210115	0.611912104326273	0.629427858430513	0.724122462687806	0.508803781738286	0.635431146643493	0.0479170600880903	0.524938091102007	0.515664321449363	0.605554130604467	0.444444444444444	0.667625706650308	0.640103393846523	0.287258121438941	0.438577947397371	0.429111453946331	0.586781903429479	0.265773015129416	0.231872346203859	0.429067076993363	0.631876923566109	0.101454076882279	0.665555384061534	0.874011013312986	0.866639819832742	0.797834890329402	0.85189076863206	0.644859089179753	0.726587218607797	0.121868087858899	0.583104088604887	0.600613824036039	0.14327315502171	0.142872391849201	0.144089138988427	0.143390462970976	1
2010-03-03	0.107069444719699	0.0971098881531676	0.825453796198732	0.0986093721396057	0.582729345789186	0.681863566773779	0.730615997938787	0.11504215277911	0.567233222986713	0.609846990650409	0.628697529586804	0.709321223209491	0.513080849823516	0.633040690010058	0.0496009137204084	0.525588613296626	0.511583398252283	0.628931713781724	0.555555555555556	0.66755713415149	0.632191641375724	0.27887776345832	0.441185432557712	0.430396670512206	0.597372190413719	0.25671239989742	0.198533152516937	0.453761083758448	0.641848811995619	0.0972744875169819	0.629925981667387	0.901390627860394	0.882181568581464	0.829656276705147	0.842355161697518	0.653688269714712	0.72840239752312	0.106592506677378	0.5584018247664	0.609665390526003	0.144525455437118	0.14336586306088	0.144929853125447	0.144138154347726	1
2010-03-04	0.100114207285507	0.112585788462995	0.828497079712825	0.0216304181993865	0.604623898032681	0.675069492987351	0.729552935419534	0.128143681040369	0.578284021046589	0.617053249923557	0.629103934273543	0.713208668497072	0.516685861091975	0.624764602320761	0.0527538758119589	0.545489082047506	0.50614217595884	0.649863475166004	0.555555555555556	0.667598248344547	0.621615203013729	0.270677708419714	0.443399912374639	0.431899307103026	0.608125097213942	0.249790046940981	0.170644127137489	0.365437181126769	0.626926010228902	0.0893974882127449	0.61005505419372	0.978369581800614	0.92022602927626	0.86405161063439	0.873661015742738	0.662550654052125	0.731713679977853	0.104849832711422	0.553488316867002	0.622713041941439	0.145783530668456	0.143932116782079	0.145823092819323	0.144932604307252	1
2010-03-05	0.104198596955564	0.150939596374415	0.835976565443562	0.0345254276284624	0.711339883024332	0.810674518689691	0.836906349744442	0.157777906418769	0.619548868011853	0.679648550772243	0.631040065448206	0.761325536980199	0.524653680034786	0.641407117268235	0.0567965313457176	0.616820833812498	0.536301176671025	0.673686864030051	0.666666666666667	0.667503451200079	0.675263846236044	0.249138041766508	0.451227068813551	0.434778423654593	0.622638642365337	0.253732314936964	0.280217956133164	0.520603507215937	0.666156974020691	0.133320207720052	0.694762553426409	0.965474572371538	0.940951679102987	0.894162546758172	0.876427686903478	0.682931737823938	0.73873110729203	0.165652582965384	0.633783248047037	0.719732254496802	0.147853365684424	0.145189818552385	0.1484054950352	0.146673512974836	1
2010-03-08	0.101831254454107	0.187431404269506	0.839550687516597	0.0457029062445367	0.712767599541877	0.744839230889475	0.777335851810558	0.181009644171365	0.617937872138175	0.669206358984226	0.629342294217811	0.758337262181465	0.529604879449187	0.637452037900677	0.0621058204966393	0.645704780184606	0.535471421425634	0.675917463974636	0.777777777777778	0.667535715545848	0.673648421228777	0.234560795864254	0.460981110492824	0.439171568941428	0.638383818157749	0.24205790519141	0.255740118416912	0.402463065968573	0.647533730245224	0.131426741350454	0.649327153071579	0.954297093755463	0.950749116202935	0.917630973803647	0.866134599797077	0.698200043373941	0.738265183877633	0.140780266183673	0.598602398987783	0.604469953844896	0.149310761168946	0.146547956889416	0.150158430082173	0.148115096359667	1
2010-03-09	0.1093183642497	0.230773520204459	0.847201765187778	0.0744318524204374	0.754403283079245	0.825287336091354	0.787169456938674	0.207122386836732	0.633309477632134	0.690793075865475	0.629696083041759	0.733148907825892	0.534587607721885	0.720364607253274	0.0651623197581599	0.64524049802089	0.552724382054892	0.679507973154277	0.888888888888889	0.667467175587514	0.703976926640926	0.217943445748787	0.470421246952779	0.444708681458682	0.655737758219869	0.254331317612171	0.34942415226771	0.612595413234394	0.676042772852452	0.132497450751837	0.636871962930569	0.925568147579563	0.946949191241643	0.931960050605441	0.840690539683163	0.715656987911216	0.742781772645244	0.175215981533159	0.620988663224041	0.657058321812264	0.151357480002788	0.148437418912876	0.1522771115327	0.149816199108015	1
2010-03-10	0.107906911353633	0.271573569504836	0.852158749292861	0.0237987093187209	0.772055915094337	0.85153753597025	0.762497513466917	0.233198875372702	0.642621488157528	0.693158269317353	0.629451789118096	0.739994655985184	0.542013641512031	0.78152523001713	0.0684164360214838	0.647691727140999	0.562910031209026	0.692317199590274	0.888888888888889	0.667458030504214	0.72206439273701	0.204311546802027	0.479372294050025	0.451056177926606	0.673592973575117	0.25331307526605	0.35008413317764	0.526392144447817	0.684126495906622	0.131548397836146	0.626729174931093	0.976201290681279	0.962624680053558	0.94694377764016	0.852569679529103	0.731011402605976	0.74567855079111	0.153196562071992	0.607346684412764	0.627463652585695	0.153597746529672	0.150197327387376	0.154128418451795	0.151448960649346	1
2010-03-11	0.108091032583014	0.309459329569471	0.855531761235181	0.00179835376057409	0.77848844725788	0.904465982633873	0.735497851939238	0.248128714427276	0.659392870387934	0.684307468688624	0.62883171534499	0.717659295719369	0.55242966655216	0.834059395343128	0.0730030501441224	0.63117857230891	0.57624777615516	0.703272459368285	0.888888888888889	0.667422055995899	0.747078108038509	0.195277686216993	0.486703623190989	0.457704948909984	0.690541166478447	0.25429438533404	0.308592607250137	0.447688615182562	0.695889517659931	0.12551952813434	0.590434042801899	0.998201646239426	0.980986809074582	0.963294765123903	0.867993361125962	0.742630075725163	0.750172853031579	0.100268582702869	0.577045968107703	0.611604835640113	0.155734014486708	0.151907740799998	0.155521770710699	0.152872235807907	1
2010-03-12	0.105648698412691	0.348879454157034	0.858993094955013	0.0390180787366251	0.789447176163073	0.866457143363078	0.715857142113504	0.264597632782834	0.642874974321279	0.680652434580756	0.629463149016035	0.71348802576925	0.561820827359844	0.883368002319272	0.0759721915013865	0.604550187048316	0.567953384476227	0.688397050267709	0.888888888888889	0.667390569127873	0.730387409575318	0.188923182427596	0.496316118355203	0.465083490695925	0.705956251145972	0.250572777980871	0.277460051368674	0.466466173292153	0.710137206759112	0.118128306881323	0.579061080461179	0.960981921263375	0.979843211239101	0.97379920675407	0.852556938779821	0.75192699526603	0.749520683132318	0.0916538838414711	0.554347276878099	0.617510666794112	0.156838981527025	0.153507527185208	0.156715920176505	0.154182366952081	0
2010-03-15	0.106557290427426	0.352011558580064	0.854890089786746	0.127390300048098	0.706859706000491	0.850064385900803	0.662314974269571	0.268244570508668	0.63249367876845	0.64517087601885	0.626548106882126	0.702647589149812	0.566879012100214	0.885437055772747	0.0782155199055847	0.585847339042817	0.55435010852469	0.676813900061745	0.777777777777778	0.667378354686454	0.706542892539538	0.191673169728326	0.503069103610607	0.472433184873671	0.717441422540061	0.246075204026123	0.2713994343621	0.420012328153671	0.716034643254142	0.109874952366822	0.528353415794303	0.872609699951902	0.947300252737079	0.969527169781027	0.794183369146087	0.753110067952139	0.751530422350866	0.126980884298849	0.503949848456062	0.565258383451324	0.157526521862902	0.154588362796937	0.156846498264058	0.154888890596182	1
2010-03-16	0.103412809705426	0.354919941258593	0.858605703626708	0.10806155350452	0.714569914942121	0.837705483729478	0.652247414902097	0.275231953673842	0.630909960401969	0.640720035854559	0.62909857415613	0.701414873788664	0.571430752155437	0.885993646613391	0.0805086823158855	0.586531145276694	0.547681495131539	0.650320444702916	0.888888888888889	0.66738472138144	0.693725774558089	0.194850033043553	0.509972677335018	0.479792065294905	0.725582642562396	0.243386378673834	0.256150203997392	0.446337102162785	0.696041301892415	0.10761142597369	0.524956353390835	0.89193844649548	0.932555981897367	0.961570770455797	0.775299880858339	0.753427750432798	0.754356579953845	0.123648262583513	0.499961663406611	0.610965281981002	0.15773307642651	0.155723789837581	0.157080647319828	0.155547718389421	0
2010-03-17	0.0977053952646621	0.362178241299514	0.854856427875759	0.14297043024392	0.704272273330287	0.814753616184654	0.63217379584343	0.279422410001916	0.597981953738116	0.62787606270328	0.629317062409093	0.709484380492846	0.572336740553658	0.883736894985745	0.0790710684836512	0.573668361967666	0.532087423201265	0.616796918674479	0.777777777777778	0.667396216418514	0.665225205570826	0.199997095238099	0.515520510337814	0.486867820504081	0.730429842086529	0.243790689929166	0.245854872620793	0.369548745609829	0.68555955300197	0.110958561401895	0.525091866571502	0.85702956975608	0.910172481770021	0.948511403531334	0.747864525817554	0.751570589536173	0.752031581161362	0.152797617955386	0.492788521353203	0.598168115473271	0.157629078984555	0.156800258271401	0.157157161569772	0.156043063432318	1
2010-03-18	0.0961098068196282	0.3644591862043	0.857700742957485	0.140693348043142	0.711862262254391	0.827924451417978	0.62532823940602	0.278668856703572	0.589301462713254	0.622555191322189	0.628366271989836	0.708877092657209	0.574217153793274	0.833548654041845	0.0783837417395311	0.517345049383542	0.534310484324253	0.584454983912096	0.777777777777778	0.667403355340906	0.669048586994633	0.204934150488861	0.521191378421007	0.493743436422814	0.732673944443786	0.241549328283501	0.210565940607682	0.368331408383524	0.671917831560145	0.110522470778609	0.508878718228	0.859306651956858	0.896069036304449	0.934918807839991	0.737316828121875	0.749420529038425	0.754711435136181	0.158026317214976	0.500639330322442	0.609868083597768	0.157506305495572	0.157814860435435	0.157335973848703	0.156518515323425	0
2010-03-19	0.0952558583428712	0.359522029892866	0.853049486291536	0.277081485480698	0.633909920381875	0.813758887173461	0.585785679425674	0.272027142353674	0.552241106194796	0.592505077695254	0.628693032913422	0.700936621646817	0.574498349413835	0.756642545113078	0.0753421707025816	0.500027281082003	0.52475509888057	0.559608765249191	0.666666666666667	0.667528881735879	0.65261102119926	0.214973522126338	0.524381537252178	0.499927436587671	0.73136493608231	0.245547344581421	0.240169265780912	0.456396064076623	0.630704005713238	0.11122662476463	0.485089746830567	0.722918514519302	0.837618618624986	0.905606049929003	0.659657604422389	0.74242482198114	0.751666785487719	0.143499500410808	0.474589796803791	0.569879273586112	0.156877986348213	0.158055043853542	0.156876468456518	0.156589781137371	1
2010-03-22	0.10090182744258	0.346820295369306	0.856844180015054	0.154898315425748	0.674736168850669	0.851384524001239	0.606349448871886	0.259436206167026	0.547827624962126	0.603172588159421	0.628509258141544	0.707320064494833	0.575911896053411	0.754106867575521	0.0740943541702234	0.489974594034299	0.528471108016661	0.551611624920749	0.666666666666667	0.667491373698103	0.658430057157633	0.219655173632628	0.527597764538202	0.505563729445809	0.728742441886895	0.247376075490154	0.238246020959705	0.406488165802476	0.646035261020794	0.111588088368572	0.486186056773823	0.845101684574252	0.842591381058008	0.887787099754848	0.691783103184088	0.739511229448071	0.754562206839471	0.228769370572483	0.513959933121809	0.636797660552209	0.157009429956347	0.158467730799092	0.157172963350303	0.156979071830627	1
2010-03-23	0.106527405452646	0.344249995354392	0.86185282095311	0.022923978216834	0.726043222192311	0.937512872858374	0.64319426577106	0.238866416928431	0.574870385156707	0.62007685818949	0.630224471091463	0.730715241836807	0.573439228597854	0.810293681300045	0.0731372401583032	0.501803226530836	0.513109404862604	0.556770478822994	0.666666666666667	0.667464535720754	0.630153133525555	0.218291181726607	0.530769301229801	0.510752281275972	0.726804819111069	0.24813516987204	0.275688686018334	0.556012939849478	0.663739861414563	0.115145326792518	0.56591966045513	0.977076021783166	0.893367378799414	0.89349990872693	0.784058901075169	0.741537906263672	0.760037994276541	0.171484616749316	0.553878062866476	0.651289700147127	0.157574183268516	0.158856393719362	0.158241093929394	0.157775508851059	1
2010-03-24	0.107345698161697	0.346515172262262	0.866822794924259	0.0572779496414695	0.739233281789132	0.927888275049671	0.647258154214672	0.219396955474985	0.591900413332617	0.615883095307392	0.629454588367195	0.727141516941996	0.572242281145445	0.816982390913167	0.0704993504845093	0.50405903229268	0.516029287326336	0.569080510174655	0.666666666666667	0.667467241134453	0.634969466601227	0.217268047871404	0.534335988060915	0.515667303170639	0.72535282727496	0.251945414692724	0.304500384038108	0.557842122643851	0.660948938794064	0.115264516604102	0.655397910543132	0.942722050358531	0.914863613665308	0.904756142337526	0.812021647600722	0.743261197136902	0.762573614724236	0.179762105621026	0.556343073968626	0.616127591803922	0.15833249442477	0.159186103147929	0.159196722710891	0.158560854711929	0
2010-03-25	0.10035649467088	0.352245253709176	0.862314217271061	0.340049711631762	0.6523314750474	0.831965619738996	0.599581593385643	0.191157479749602	0.551683348955185	0.582119465668306	0.628850352689208	0.702866141945679	0.56695447492622	0.73299682030169	0.0654881701004318	0.478687428201178	0.493932464964817	0.574923947762723	0.555555555555556	0.667833265417387	0.597452875286409	0.223250217307398	0.536563102961506	0.520076491154144	0.722328045699382	0.248534271732352	0.313963837873254	0.344364490491867	0.595392458925831	0.0739775962783145	0.602030396880699	0.659950288368238	0.827503602398908	0.881993106560182	0.669510216283947	0.738897050284932	0.75758441445648	0.229849121141015	0.512546551396423	0.566251720164617	0.158621372824298	0.159269803602224	0.159177936942491	0.158843306834609	1
2010-03-26	0.106534135657795	0.359437915594582	0.867642483408181	0.0792820896082484	0.712909442445037	0.817965237741013	0.66132432581557	0.170041640414321	0.544622022532678	0.606386938596103	0.629212876509172	0.716966619761693	0.562121061103727	0.74147601610535	0.0624055091874149	0.525592814243516	0.501994954211382	0.601336114460878	0.555555555555556	0.667658139344781	0.610629647607202	0.221688869957003	0.540512238428305	0.524449963497869	0.720187134391371	0.252239006865827	0.345798721931189	0.538313871936129	0.61874948366318	0.0855209286801965	0.646433116430559	0.920717910391752	0.86304126529679	0.879130307872366	0.742712723149921	0.740737235142373	0.760298904208771	0.254392999055283	0.556926515290756	0.65935721949041	0.159870785831741	0.159582773508279	0.160190222863435	0.159637071558183	1
2010-03-29	0.0977493563919136	0.37205967071275	0.872138257429953	0.11447472005319	0.731842520650971	0.755141141677877	0.674217608553373	0.159389840151472	0.520382582303919	0.608649567491292	0.629415163184624	0.732135994031636	0.556977642473723	0.728855858602212	0.0584342130423885	0.531335540212207	0.504748533277351	0.614698683377995	0.666666666666667	0.667743873497251	0.615043862478042	0.219619704974308	0.545099070840594	0.528931493078733	0.71892815442143	0.251979392388605	0.346832021845609	0.338896923131483	0.603916080744339	0.0756564715154456	0.664374266951964	0.88552527994681	0.874077010365214	0.881045275487653	0.761922210783324	0.743051370984242	0.758408612249087	0.176518217885997	0.553782986302606	0.622289171218467	0.160974301272819	0.160205070784833	0.161224349525151	0.16048377077966	1
2010-03-30	0.102764748227894	0.393223208538401	0.876522337227026	0.100738873739936	0.772196746504953	0.773059275308794	0.718890801603718	0.153637263503948	0.503753583508048	0.625640133917056	0.629845536726327	0.726155197721312	0.551965613726811	0.727248282893325	0.0566487493371259	0.556740127965114	0.512578835103639	0.621549054265137	0.666666666666667	0.667682290119027	0.627543207974039	0.213738641217143	0.551676547960773	0.533925973999683	0.719486896354673	0.250889851307649	0.344659970625662	0.426478517521529	0.612571091320794	0.0811673822731989	0.685791562861789	0.899261126260063	0.886373880822654	0.886582356521521	0.779051423749986	0.748723315343912	0.758354327784165	0.192133961281381	0.575330211406678	0.647764563737648	0.162056170177311	0.161034805602026	0.162748097733191	0.161634610336319	0
2010-03-31	0.102703374484767	0.41287506509079	0.872941813338278	0.147834017091133	0.744987221591494	0.73040517075708	0.694186482783351	0.137347677574559	0.476059287753782	0.607536794763058	0.62875873589341	0.718361537236527	0.547483924707678	0.665852784722456	0.0535709009683678	0.547354994779747	0.518915748480969	0.622007644857901	0.666666666666667	0.66778115147179	0.6384425520856	0.212835004018394	0.556218977829808	0.538894796976124	0.720118409799289	0.252517281862526	0.319655151869707	0.46557320505896	0.604158974902746	0.0833999952381511	0.61882947802034	0.852165982908867	0.877635363485455	0.887246152946619	0.761101766642836	0.750286281825119	0.755980050558396	0.168709716199443	0.54843913034326	0.591639575459252	0.162869371410136	0.161826692491245	0.163558955867926	0.162463666214405	1
2010-04-01	0.11060761380376	0.43651305273067	0.877956390505451	0.158457458416105	0.756914220529662	0.697803772910146	0.71425715421484	0.115823938795243	0.465965891521558	0.604706661883638	0.628893351697972	0.710117475342088	0.544112859432894	0.675519456024601	0.052160966257184	0.570808810923669	0.520110106891451	0.636062030999047	0.666666666666667	0.667787393381579	0.640204805140409	0.212371587558335	0.560284844887592	0.543740987639379	0.720690058353559	0.259101335151283	0.342549518064425	0.532185553638731	0.603193690133732	0.0832910583778837	0.590059404693982	0.841542541583895	0.867989266255221	0.884346648244055	0.745850973336978	0.751435698939483	0.756493999660381	0.247204690258817	0.546471795656384	0.615230707104718	0.164215558828046	0.162650604025661	0.164333427284588	0.163270406110935	1
2010-04-05	0.105853182092545	0.458462612681988	0.883647418439878	0.0287624036333489	0.786528280368163	0.707295174805087	0.747313926364097	0.117037958958857	0.511879760980008	0.616959379113456	0.629040537852817	0.724025544042806	0.542368741319019	0.749997852036351	0.0518456255142323	0.569913567868714	0.529566135187537	0.633471417502712	0.777777777777778	0.667531883809938	0.655454428120108	0.20954485482602	0.56400360824732	0.548414703754751	0.721894486168738	0.253127947362407	0.379583849933271	0.522863034830366	0.63259828124494	0.0730899912674686	0.585664377540797	0.971237596366651	0.908199678353218	0.896345147936618	0.809535849862215	0.754592744628939	0.763995799662284	0.22647460182219	0.553431256051903	0.63507888989769	0.165311861388681	0.163832612781753	0.165457391760866	0.164264093835896	1
2010-04-06	0.10742836512835	0.483083067772504	0.887363940173705	0.0377187758022582	0.798277583650206	0.738818046556315	0.740031529703616	0.121735664231227	0.544322395716472	0.616788791690326	0.629644420701359	0.723255935167306	0.541502901136511	0.750975717232011	0.0511838418334544	0.55167739020418	0.531291218804932	0.632060220564944	0.777777777777778	0.667525956828387	0.658015022208281	0.207623144734912	0.566295492175669	0.552644724201835	0.723360387280853	0.253603557352573	0.352380911435664	0.452837560753564	0.634755727937009	0.0729038084870684	0.588503628579154	0.962281224197742	0.931785714829725	0.912515885267291	0.83541781016816	0.757022790822929	0.766808070144374	0.166022058184782	0.547936557968841	0.616065844087117	0.166344612776745	0.164909080078878	0.166459878010765	0.165216116622216	1
2010-04-07	0.107592080948502	0.50973887150395	0.892589334952147	0.0655789926878653	0.810131616007171	0.714651611104266	0.727478473871053	0.131405308697611	0.558131256315903	0.617919083952012	0.629316446848313	0.71621398249736	0.544156863342275	0.758006618141798	0.0499960169469295	0.551681094017057	0.542770998045009	0.626409228901221	0.777777777777778	0.66749965673455	0.67712540815231	0.206389022540609	0.568823425634782	0.556570362902766	0.724845243067407	0.245501859565196	0.374049062583428	0.523890400589198	0.642339488532624	0.0707939220273411	0.58612748813595	0.934421007312135	0.937490603273308	0.925272921336192	0.830565325204655	0.758867147304126	0.768132237163609	0.144273005303646	0.543601387556085	0.616134787291771	0.167030697001808	0.16579995368177	0.167383803969475	0.166135381455432	0
2010-04-08	0.109862751928762	0.529435602173049	0.887825476167635	0.0945284531979553	0.784993705966022	0.691982143368626	0.687438289671526	0.139613763421647	0.557981306084506	0.606309261315812	0.628672703071712	0.710614916320234	0.544753963456416	0.732734878677508	0.0515454679789985	0.566238620883246	0.532319636529532	0.624805508940555	0.666666666666667	0.667533311889233	0.659610010019552	0.208616191698692	0.570768609080904	0.560127639111967	0.725354897609761	0.244856827608612	0.377772858788302	0.563252242687798	0.635822255560304	0.0734854549546159	0.560428419640318	0.905471546802045	0.93088301082262	0.931488312135972	0.809815064657595	0.757677184659987	0.768712602540018	0.16354420214081	0.525894538057049	0.594402716736696	0.16774567335282	0.166570004113093	0.167843013326368	0.166801449080132	1
2010-04-09	0.105238442290295	0.54816709982957	0.890603887466509	0.0125825336446547	0.807593765484369	0.680351106740903	0.696665035678444	0.148202486797079	0.569364414879336	0.614271250327169	0.629137659155931	0.710273545153478	0.543659064719547	0.796232749290419	0.0541938269051833	0.548989574217058	0.526447253440704	0.617702287321254	0.777777777777778	0.667429659671121	0.649150402399562	0.209076586745974	0.572722221067616	0.563392031184614	0.725581728890706	0.242870881823286	0.323454723022569	0.34242050954702	0.659428282685058	0.0596093537155322	0.570679445879825	0.987417466355345	0.95594747219013	0.94431586610623	0.842792720476358	0.757860500860487	0.771896861265651	0.109637568438	0.535090646603545	0.625972863269039	0.168586311728674	0.167671948130285	0.168592833307537	0.167590014380737	1
2010-04-12	0.0958489182927894	0.568701473360478	0.893372684402148	0.0445012001230072	0.813632904539488	0.679834039476138	0.680259374846623	0.158293948820218	0.557414286621351	0.611710718224379	0.62910643114554	0.713858529648211	0.542490913313529	0.793765121692657	0.0572821606286284	0.542157564924086	0.524755383868477	0.610194001486424	0.777777777777778	0.667441253105001	0.646191045755702	0.210528691914433	0.571866012146334	0.565820097813856	0.725299647423149	0.240557832681963	0.278361661552392	0.385273547914553	0.647619193433857	0.0586232691221606	0.581803095126095	0.955498799876993	0.961178471076889	0.954679927094596	0.840018293293447	0.757109143929892	0.771018538049747	0.0827513416734303	0.527719140219527	0.608964651076252	0.169135188808611	0.168500956031738	0.169213295099258	0.168301409109356	1
2010-04-13	0.0897324076160493	0.58050367120327	0.895918535195658	0.0430612314445639	0.815406520408831	0.682847453335424	0.664735554934865	0.158751947676767	0.555607029182263	0.605093558819624	0.628665873084574	0.710053712429548	0.545979222874064	0.742420927229093	0.0617398418687546	0.520139010524686	0.534244159865884	0.601859833050274	0.777777777777778	0.667469145136298	0.661960783283547	0.213294294946671	0.571079099919126	0.567593951250467	0.72423489092362	0.235356990399429	0.234315746730042	0.30784084519039	0.627701177578941	0.0521154864089292	0.561453036197179	0.956938768555436	0.965183647513392	0.962976954779974	0.837439672735785	0.755110697278346	0.772925384659282	0.0831054120010323	0.520916175888778	0.604421399860794	0.169552622280413	0.1692317058403	0.169660679993215	0.168901986179461	1
2010-04-14	0.0904533271442177	0.599194448700777	0.899278045126655	0.00682283203049631	0.853936028745538	0.694555845717553	0.697976804493728	0.163274275471695	0.571235854477932	0.622185576265533	0.629514756743806	0.717707791111075	0.547749422449652	0.736540973938743	0.0683847705494571	0.546483318124748	0.530959596513085	0.602332889436824	0.777777777777778	0.667449713605271	0.655378844869702	0.211698823467486	0.570119073524342	0.568807343559739	0.723785621855884	0.234167615539272	0.22644426018214	0.36890305102069	0.639309660049533	0.0568774523174591	0.603481648314	0.993177167969504	0.980885876448267	0.973948580255379	0.854411505784721	0.756749631428931	0.77678427286198	0.0701822869356924	0.549860831877007	0.64342604241198	0.170287830789267	0.16994789687357	0.170745034301038	0.169824971091931	1
2010-04-15	0.0879985349345764	0.623273045612601	0.902410651429445	0.00590914441320223	0.885413010011809	0.761770810695666	0.724263930893889	0.170432240428343	0.593465146730018	0.637398614943254	0.62994896364744	0.725517276139191	0.550978806242117	0.807656312557053	0.0783627149662264	0.560546252980083	0.536732622454316	0.609674840428868	0.888888888888889	0.66735830953331	0.663736933845595	0.207038944747839	0.569717375514376	0.56969199160639	0.724720659151304	0.232107960702012	0.213592428450211	0.374794026095095	0.671474001251199	0.0398905428297012	0.635973190918683	0.994090855586798	0.991682610877673	0.985003688477499	0.861670288200625	0.761107347828452	0.780697399030767	0.111981953575428	0.573392596215786	0.642519411482054	0.17158346375413	0.170961045206124	0.172246772485973	0.171007756849262	0
2010-04-16	0.0915377636679587	0.6500436186157	0.896170580500121	0.208176959786542	0.821023585484128	0.711551929696289	0.678183336668321	0.170819408611211	0.5818121919556	0.616016216486936	0.629216805758111	0.709167700158552	0.551781631096924	0.81207633032264	0.0795147541881532	0.534308273556376	0.520209593579005	0.609045121379752	0.777777777777778	0.667413373012528	0.637378745562605	0.20817656696304	0.568597503484606	0.570159771879701	0.725124257239177	0.243449668935727	0.308464309662954	0.486620380048609	0.639498900915688	0.0381846093168042	0.613786920589464	0.791823040213458	0.926140557701809	0.969665729259942	0.752564750073004	0.760594337798572	0.779574487254327	0.142399560295826	0.537568354795801	0.583966190279829	0.172393778706883	0.171792962475579	0.172881418325183	0.171774258242242	0
2010-04-19	0.0982973526065028	0.651317788143515	0.891457144744099	0.234557278476506	0.807026540087249	0.788350666679311	0.663597371670696	0.15874774636715	0.596868602249927	0.603296073251773	0.626901717096514	0.699828782981643	0.553273898996678	0.73067979702555	0.0804718578762581	0.525435300110789	0.521934988092299	0.610702470397096	0.666666666666667	0.667434776046516	0.640248398852505	0.211539842869195	0.56707239411965	0.570207233815504	0.724461035717585	0.243657344967071	0.332474478159563	0.46291211799055	0.629482710545686	0.0405777901706085	0.543534659779129	0.765442721523494	0.872958923072816	0.941014844898873	0.684393758670434	0.758053435187602	0.784171862757428	0.192088563558916	0.521961016655814	0.598585394736279	0.173084195171788	0.172417443909434	0.173224937962408	0.172357704001967	0
2010-04-20	0.101485006878556	0.65683158763726	0.885318664810311	0.363762517620782	0.706141635258058	0.712637267518893	0.610275244790557	0.142886272246208	0.562514767073712	0.575985890832057	0.629613706054989	0.695237992049175	0.553497553391126	0.739532402276783	0.0783687835698619	0.503193104338317	0.510488500621364	0.609235247340569	0.555555555555556	0.667643061277423	0.622334305524627	0.220055545082052	0.565760825031743	0.56996419314998	0.721473370167505	0.251485510639784	0.393683023262466	0.52488205662466	0.597419031667114	0.0443683179815019	0.536090436833891	0.636237482379218	0.791039504687399	0.893532039144332	0.58359349900649	0.750875603780461	0.780231853123242	0.246496937793783	0.4853456026414	0.571870746092992	0.17339618975344	0.172785003539364	0.172855954554802	0.17250674122829	1
2010-04-21	0.126022275203416	0.67961189304734	0.893486310811226	0.0410482778475842	0.862053217598663	0.708183129034673	0.816225936442208	0.163723617847939	0.57903058391496	0.676826609676079	0.631692038811081	0.792076462626237	0.556603139998937	0.814253435944044	0.0770507066880811	0.598629003641675	0.550667417065734	0.624436205699246	0.555555555555556	0.6674251171732	0.682190124262735	0.203892956103394	0.569367598234248	0.570542529752966	0.723639161270564	0.262036479360666	0.492222502766719	0.629424169085694	0.678995622860734	0.16434684098795	0.739255288554066	0.958951722152416	0.852481571520992	0.883164364660816	0.716962022112785	0.76474998875045	0.786154862283712	0.259035179372408	0.635033174076957	0.779956217446855	0.175350464160869	0.174140237055168	0.176137697015815	0.174565567003105	1
2010-04-22	0.135370945423707	0.707432946927461	0.900082881398123	0.009628129996725	0.904756708044344	0.757700238979243	0.853780728031066	0.192667893675012	0.631866454940542	0.717073193091362	0.631011055332043	0.842514725651118	0.561921355585807	0.820551131420101	0.075280492137461	0.63122216730515	0.571237844197059	0.63931335555063	0.666666666666667	0.667405075467058	0.711431924786089	0.182640306589315	0.575301508164622	0.572276568813551	0.731554263751111	0.267469256349864	0.521150859959384	0.511517139726976	0.70966210512662	0.17519930767711	0.73016693534546	0.990371870003275	0.904742313366705	0.894359102714709	0.805259090159985	0.783941609923192	0.794477769726678	0.37853718963716	0.680412121337659	0.686843823602952	0.177885386158997	0.176070458079645	0.180073697877211	0.177209887675632	1
2010-04-23	0.138477164213455	0.73775303054465	0.906708807219982	0.0422679458890338	0.925457953309121	0.83492822371621	0.827600091478656	0.230482142576821	0.666135089227719	0.731726742031906	0.631817880096929	0.770031806504744	0.568040770837341	0.825271972359286	0.0730242580872793	0.654765225060105	0.582186587334324	0.670040416219612	0.666666666666667	0.667400674180046	0.726328276870875	0.163013521394307	0.582094993114187	0.575119338072344	0.743777033797076	0.274541126718612	0.540925783978762	0.48536382803502	0.716971799849037	0.176594016178335	0.714341575792494	0.957732054110966	0.927844824996891	0.909826474488197	0.831077615248307	0.802750915384703	0.798704543197425	0.442059439601615	0.686589315048917	0.652190491244598	0.18126961326845	0.178184092619482	0.183749021528231	0.179950647326126	0
2010-04-26	0.140584133693149	0.766254095660028	0.902725806997175	0.0943884145032117	0.889135453879731	0.796322098776172	0.757699428345741	0.257125679295117	0.646468551678579	0.705564693182191	0.629297625139084	0.727534365885584	0.574286164182051	0.827220220908441	0.0681891859948427	0.645583003987051	0.579930674878049	0.699475432302201	0.555555555555556	0.667427886692116	0.723532324252535	0.153789728334487	0.588733583708936	0.578815904602164	0.756443208955016	0.270047984637239	0.490458823713019	0.467617488574459	0.704992015884041	0.181238872916028	0.633744458042368	0.905611585496788	0.92450285291165	0.918980179112533	0.813032237828051	0.813101425752721	0.796653791320427	0.492721798777565	0.623288806208905	0.587635285401883	0.184509407945501	0.180164530506454	0.185878543170958	0.182017011267268	0
2010-04-27	0.150704758444059	0.75593258743632	0.896828291406834	0.307637636703657	0.710554199065017	0.766807301742206	0.654070959196111	0.261542558878715	0.588829395525023	0.637491138764942	0.625506952152964	0.669226834642885	0.575616662927184	0.73968954441572	0.059381100933098	0.578019126456678	0.549074775101145	0.724418207244402	0.444444444444444	0.6676353229895	0.678505498765123	0.161499575041267	0.591439107701268	0.582352829826167	0.764345585065646	0.274729753469657	0.496260873364853	0.478702767435229	0.663693242668261	0.212053659316203	0.544658632818234	0.692362363296343	0.845585844259331	0.89774066274898	0.685143773399563	0.808498832678074	0.792059171660399	0.601212248194337	0.502755423034348	0.516988201757997	0.187029883880655	0.181591815637609	0.185499391914367	0.182720031266048	0
2010-04-28	0.159071491733074	0.729040307132326	0.890522898677904	0.344721986460495	0.701118348839016	0.788765699703195	0.635377545016192	0.261033409994703	0.574060277621926	0.624054635366872	0.626473208843529	0.67124526313336	0.577241351607897	0.718744870835334	0.0480234802260891	0.554645977592829	0.545955867446321	0.704622508962162	0.333333333333333	0.667627671079974	0.673781558529773	0.17063881130914	0.592544905042825	0.58541929259728	0.767934860404526	0.28114687286126	0.508603376722089	0.512833665699447	0.665008714145329	0.211640751481703	0.503708234094037	0.655278013539505	0.779638171828379	0.860732420908216	0.602467685684811	0.802068022630542	0.795147456107867	0.707672089247089	0.46390666871194	0.597530644304178	0.187373645589391	0.18274979866338	0.185140533510845	0.183236980680746	1
2010-04-29	0.17183753101479	0.714230906935208	0.895169127008602	0.13069387827165	0.762034017134341	0.84212827115611	0.690433038003288	0.265653879082888	0.585071042193266	0.6631043726782	0.633178478294705	0.732609448371038	0.582618210532087	0.727510649570083	0.0445980534070107	0.606932428341054	0.568849334640029	0.677531965858882	0.333333333333333	0.667569711272401	0.706537526926142	0.169200227721859	0.595637653732768	0.588535099635774	0.771172794838705	0.284706289199309	0.476858262516122	0.562918267478389	0.68976172809568	0.220794179501456	0.540833006518989	0.86930612172835	0.812642188364769	0.847494998240259	0.683741073731229	0.804463715486939	0.799230732067857	0.693875372419921	0.528660407914936	0.683705206558264	0.187687096281857	0.184185096918084	0.186598865701859	0.184591983646688	0
2010-04-30	0.188836969572485	0.702860038891833	0.890659059478292	0.367787018546055	0.617745631533509	0.787303700426418	0.595714788294664	0.261927217549434	0.536466072121016	0.597547647248952	0.629425499908226	0.707587692341775	0.583154478770383	0.671498565262408	0.0389949009557487	0.563339502276457	0.532983062469168	0.620062703233544	0.333333333333333	0.667866445956451	0.653750082948261	0.182362584059908	0.59683281014085	0.591283813483863	0.769795954758623	0.283021244290547	0.44716611138478	0.557289858647831	0.650949525332686	0.246699223938168	0.511554597002365	0.632212981453945	0.749381050738781	0.816752275971445	0.59845574175284	0.793885865750368	0.793334436240219	0.570266781496649	0.450002184769972	0.515657281197161	0.186280249610915	0.185181501181351	0.185750533516379	0.184701055043204	1
2010-05-03	0.198155597302556	0.692301375708701	0.894436479939049	0.203887594329229	0.666616310660485	0.743675570859333	0.638083627966356	0.257423775161804	0.52223082613492	0.625515611931664	0.628204545552264	0.697315566291281	0.582524262333918	0.710319083467281	0.0367946340538453	0.611593517787088	0.539718777560436	0.575109168403715	0.444444444444444	0.667751464881893	0.662432178925178	0.186415652905477	0.598283103351808	0.59379351711129	0.767392312967157	0.27662986086539	0.403980930354712	0.537300771755177	0.676121648150607	0.249994219930429	0.512687146339177	0.796112405670771	0.766148732760227	0.802066543744623	0.649747227194916	0.790705748735841	0.795287292105694	0.437939755878207	0.521140977964437	0.663533890762081	0.1858252741961	0.186584774790859	0.186453345284684	0.185486686650883	0
2010-05-04	0.209945327250069	0.660584780445117	0.888418610213298	0.446272346782633	0.546649158775925	0.683236556824362	0.545974514677791	0.245844824935089	0.487188975153858	0.562169882403024	0.626357591812414	0.68763067606914	0.581436396338216	0.642518256680425	0.0338768695445245	0.475237045888628	0.519313772955161	0.538367142487665	0.444444444444444	0.668389960758493	0.6333122136993	0.203544930863466	0.596474326833304	0.595413740628892	0.760375856489287	0.284316284342242	0.426769879818266	0.577646553374217	0.621781828739651	0.272068689608731	0.442362138719758	0.553727653217367	0.690160394066638	0.765948751292356	0.546286282088958	0.775884714867587	0.792001469343188	0.372952194744476	0.451155756742138	0.513483105607497	0.185339956183991	0.187610293194627	0.185072399962862	0.185114023291045	0
2010-05-05	0.222529049570166	0.606419276584535	0.881076449249443	0.531280622066419	0.509294148115439	0.712997235359105	0.508864021094874	0.233069361620071	0.506363631276521	0.536890938340487	0.6248018608584	0.65593456735013	0.580044525258858	0.572163209224551	0.0300663473316676	0.419457225467056	0.511483678392805	0.524095303079618	0.333333333333333	0.669451899989166	0.621814594697548	0.222483725162936	0.592691425774056	0.59589941403641	0.749207926574715	0.291386210906878	0.475056646957014	0.635227998534665	0.591494871958058	0.273656063464721	0.365537917170964	0.468719377933581	0.608930689324237	0.713726968488844	0.452790410592728	0.758889689036251	0.797313968034605	0.412211757971573	0.430781145948025	0.570756115156284	0.184529640103343	0.187375195913312	0.18350312474902	0.18445298107154	0
2010-05-06	0.329741833339958	0.616392284822939	0.870385742918957	0.33617744605855	0.392558882033642	0.763122793428122	0.403712068774802	0.248008996692999	0.568095638455648	0.463783667210287	0.563692355009576	0.609559275080823	0.577828659463964	0.476938530770024	0.0251831511793696	0.342436467688507	0.487396370948447	0.47913259950919	0.222222222222222	0.649451860682054	0.585623779721749	0.253763015559849	0.586144835657945	0.594885313200733	0.73138489240347	0.311181678728767	0.580378562626729	0.568103187116189	0.550407527287093	0.300791753145584	0.16569356751574	0.66382255394145	0.624940869860009	0.684459414774775	0.520917046305341	0.730801822762602	0.805764160986683	0.928562428393303	0.34306630636947	0.484273104525994	0.181295613474859	0.185903514360705	0.180108352675658	0.182622645562814	0
2010-05-07	0.360917618508601	0.625652935330028	0.85645124820624	0.467726483497384	0.296996387690208	0.710515588137568	0.298442996064885	0.258338421752072	0.582307401880711	0.390242623614275	0.635109674730399	0.50953652074809	0.561063553185108	0.57133351960074	0.021183832153644	0.29141886355372	0.404384264325351	0.449002965272045	0.111111111111111	0.665169091863179	0.45801832083595	0.295531056545753	0.57619838056142	0.591942954952943	0.705675116723591	0.348442615259364	0.704593998231715	0.684959864942801	0.497849975134721	0.328818896676623	0.225640852412209	0.532273516502616	0.58830644774981	0.652255165055689	0.489620359013818	0.693231401003084	0.805712028112666	1	0.278650002242942	0.471095053172286	0.177651392196573	0.18335827544732	0.175339835764961	0.179749554295375	1
2010-05-10	0.382647159801877	0.620952931234638	0.864634817268784	0.238180970081006	0.480083439619261	0.766049986935791	0.487168881250853	0.249717607731067	0.635212108509591	0.517968577497024	0.633984324585707	0.711531678406722	0.546387330838993	0.581010069829006	0.019310604805721	0.432349508676092	0.440482283480632	0.430782150032831	0.222222222222222	0.66973603570716	0.516614378330519	0.297306299863717	0.572380814553686	0.588771135810157	0.684441758672078	0.366527768719034	0.68679169799042	0.514376708314248	0.60963735703728	0.413092300536281	0.372741429293229	0.761819029918994	0.64643302531892	0.650924493409897	0.605141985409881	0.687892946053247	0.814264231957678	0.901601397201504	0.517706131340592	0.82867197654952	0.175866094317141	0.182229399173541	0.176532491067796	0.179799088577047	1
2010-05-11	0.372920452526393	0.606572015078535	0.871692667776982	0.206148195208936	0.500738174469179	0.760321426897335	0.508138002412108	0.239079074715365	0.658475110838613	0.53122122458596	0.631048424741329	0.841639994893426	0.53041644870864	0.575731620044516	0.0175325312397577	0.449274828832068	0.434410719752763	0.432796400347263	0.333333333333333	0.658621180196166	0.508648275070602	0.29483770914095	0.569365471886622	0.585587628300531	0.667982615670626	0.381597693239898	0.649968355176973	0.421504433132921	0.545510040074187	0.36664539139324	0.409948641440563	0.793851804791064	0.696703754900109	0.667454430304266	0.682838807593563	0.686439917491605	0.816918201017515	0.754570861750622	0.569958625060951	0.632909028295655	0.175554101991275	0.181827633582847	0.177937654931278	0.180174567707007	1
2010-05-12	0.363680439320298	0.58797180301802	0.877133210122048	0.135625925273403	0.544717146313947	0.755416773825567	0.563786202645983	0.233341944215799	0.675539359365859	0.565505528634186	0.630918899000808	0.747189073035755	0.517842618787554	0.57021273733028	0.0157449304491146	0.441841471048597	0.457303565154674	0.455125521177665	0.444444444444444	0.662021096472143	0.541940889074916	0.284323081181768	0.568131762211605	0.58277649384594	0.657546533609297	0.388548270232046	0.589650956043024	0.41151640525125	0.537464643171474	0.361946243003024	0.468223035983414	0.864374074726597	0.755578906427271	0.698872571121833	0.758684990399012	0.692195001496015	0.820763696954065	0.585241934604062	0.632255189857203	0.668218009784537	0.176435187764407	0.181863294511785	0.180217518952933	0.181219194836319	0
2010-05-13	0.370516093896614	0.566208385530444	0.872147173413292	0.182852512482478	0.506661143522919	0.70155781537845	0.513522457834977	0.228894997594649	0.63702409339992	0.535162707865035	0.628978442120009	0.718025474934564	0.50946114953211	0.506046850735654	0.015293881491211	0.462697477313422	0.469678983662654	0.519484745351149	0.333333333333333	0.665339774818249	0.55926190262831	0.283330398832705	0.565934618864027	0.580056837369113	0.649495019961218	0.394738664312005	0.530630885318963	0.391879697738411	0.498111078504488	0.359325409857845	0.465756093545765	0.817147487517522	0.777845306418927	0.727532527935686	0.766292294787418	0.690744823390332	0.817148392795948	0.498336086224014	0.580632580122285	0.558912649655674	0.178184344544846	0.181115066898033	0.180838003651718	0.181580064404371	0
2010-05-14	0.37894378566078	0.55340998324029	0.865833795874218	0.229240631336828	0.462102467957447	0.722032266353615	0.456157258524171	0.224213492297494	0.618157693215126	0.500174296813184	0.624840939151232	0.6708525350136	0.499453312571917	0.45025866424469	0.0146904596893563	0.407903376818529	0.456075889067058	0.598255384151577	0.333333333333333	0.665649220138031	0.539027060466656	0.290668110411244	0.561714240601404	0.576976875109804	0.641179758074075	0.394983505877975	0.507244457395456	0.551450146221835	0.481824258255933	0.362318922760776	0.402810183071392	0.770759368663172	0.776007403387907	0.746002396628246	0.739489169943242	0.68259993977668	0.819148963770409	0.39252385890301	0.50828826089817	0.548553453488588	0.180778479836237	0.180585927368905	0.180156937759015	0.181274268574051	1
2010-05-17	0.379480970588373	0.543559017476478	0.872176039782326	0.224101502607331	0.46582715771764	0.718456852043726	0.455578667289774	0.216315633549898	0.626658594919203	0.500521247038901	0.628107905165504	0.687760819393949	0.485228660793957	0.449382870373134	0.0145741547500491	0.452536220203166	0.434045442979892	0.621045244237129	0.333333333333333	0.66441140091755	0.507528824383758	0.295974541284113	0.557784140661477	0.573670861801943	0.633196283233558	0.400423669322799	0.487902123066615	0.468357378171684	0.519458206540424	0.353228993317296	0.40305020211496	0.775898497392669	0.776630276415561	0.758531446163989	0.724969183005513	0.676075283388741	0.823688550834391	0.398595002568575	0.475632973755642	0.607465663562964	0.180811705329921	0.17970305609097	0.179799359273967	0.181077035935379	0
2010-05-18	0.380912957769939	0.528738970901235	0.865668815263456	0.247995361623351	0.446496647415292	0.715550185391502	0.425273979448749	0.207504886293589	0.584503616818682	0.484430595873532	0.63051585554842	0.701007985848167	0.475788149565871	0.517814123681307	0.0139265772108425	0.457120664573338	0.452924155986939	0.617613468923889	0.333333333333333	0.66478840962696	0.53421420280947	0.303408398485998	0.553469142931007	0.570101541385222	0.624935431272989	0.401655263608273	0.474602287038157	0.45953397539889	0.512206529732999	0.353674551365654	0.424113992164408	0.752004638376649	0.768452777204235	0.764050928102136	0.702018271811237	0.667793541452762	0.819410899663539	0.376716215652876	0.456116503485808	0.580247598270109	0.180210833476635	0.17924306278762	0.17911246729911	0.180669413251252	0
2010-05-19	0.381076559033407	0.520996273959812	0.8571408750742	0.299635520295155	0.405414977718326	0.666525140371435	0.382334291137502	0.213026709554654	0.544459064497029	0.459339906383371	0.626423577635107	0.67155282031809	0.461153673072832	0.449881557838929	0.0142515591941447	0.491068063111857	0.422134580668405	0.581798854569433	0.333333333333333	0.666080973844527	0.488817052614453	0.315926052102454	0.546984564294211	0.565856731758671	0.615150328471552	0.402858633858037	0.501489343835674	0.582862979985388	0.457099406230932	0.341579158415754	0.372764490047448	0.700364479704845	0.744430194389706	0.759407597138876	0.660799630341044	0.655246906055786	0.817876106405324	0.3159893909601	0.423095463014535	0.553652881074802	0.178224790814229	0.178686273748063	0.177685213372355	0.179803699411981	0
2010-05-20	0.384071958551559	0.521978481193404	0.846474658598734	0.408110775016359	0.312125090453442	0.554976103948778	0.278957988455763	0.230905176993449	0.461091108225042	0.392820834873341	0.626060500153074	0.590956702908761	0.448973450300415	0.426627431012865	0.0147539417584917	0.490421311536889	0.412479889893109	0.521117635248637	0.333333333333333	0.666180377955788	0.470764449453824	0.343302763440072	0.536253508459224	0.560161701859383	0.600404960600661	0.416451111749321	0.557057770341734	0.637156039203913	0.438450220427881	0.354864942003992	0.287828564198545	0.591889224983641	0.689405094122203	0.737247768514859	0.580863348780724	0.63034493703716	0.809430762273891	0.016439596526761	0.340012017003507	0.469787890065278	0.175249333824792	0.178068339670991	0.174182550751193	0.177694684318923	1
2010-05-21	0.398196525541616	0.528068945016465	0.856650146800618	0.325892868771538	0.363341567177188	0.582268749571274	0.352151829204985	0.235589743142592	0.489003497755834	0.435578762265548	0.627170805949995	0.655502326142416	0.441476319740197	0.368507206500394	0.015163659950264	0.409546845611378	0.436534294188198	0.465261684422221	0.444444444444444	0.666213907640845	0.507898895502309	0.355711683154935	0.528437087387781	0.553930970767029	0.585495018743643	0.4283065285338	0.585650095780133	0.665037779641663	0.43720555624378	0.354103074392527	0.31389456840959	0.674107131228462	0.682289029235341	0.720009081586414	0.588582028859469	0.616969285560031	0.818493577379325	0.0206769839741322	0.429886326354763	0.660637757692368	0.173588282463563	0.178538521729988	0.172946998135551	0.176572833045189	1
2010-05-24	0.396794122623536	0.520032907447089	0.862920923166036	0.264180665428506	0.410461564531175	0.553156620673843	0.411953510194162	0.22205965408417	0.451828756573215	0.47589109874026	0.632591932897177	0.768055069353575	0.442044679761284	0.42467072738683	0.0154402762640206	0.421376489377839	0.483580926940785	0.450115619574873	0.444444444444444	0.665388372394893	0.579703971512412	0.356688534363925	0.522860973631486	0.547751675728563	0.573317691287852	0.435947622498757	0.539969112083338	0.461602881302848	0.497816776812357	0.353171419341832	0.424724141432922	0.735819334571494	0.699738027507654	0.714562091862026	0.62960154078309	0.612721067330546	0.811938894101228	0.0255880129065218	0.501029649806631	0.658072874308196	0.172510762717318	0.178012300662412	0.173193913686978	0.176242772695343	0
2010-05-25	0.396647948295529	0.521749840010862	0.854207749349034	0.285585160834898	0.395806456878276	0.625241794791888	0.405527786213078	0.22218282430371	0.491189411297222	0.470589489113488	0.62528269977822	0.720200282350135	0.449252515031346	0.420879375590108	0.0156744127828347	0.381960057752536	0.512943723256638	0.443796914173609	0.333333333333333	0.665231822618455	0.626165812567329	0.359470861631185	0.518036784763753	0.541774633188303	0.562926697265167	0.445351824545621	0.543150379569807	0.489455704418916	0.503165560906583	0.35246520030894	0.372062977289197	0.714414839165102	0.703673174059433	0.712294156164043	0.640158296355031	0.607324400346785	0.819823838173796	0.0448636569921536	0.50050187064157	0.583553081597265	0.171479468567962	0.177189850347987	0.172987187078512	0.175768842298712	0
2010-05-26	0.293096840034078	0.51159507698465	0.847135372539	0.518267153843092	0.384884833357942	0.555488580990854	0.399061694417885	0.219666247785594	0.443934036350753	0.468651852018515	0.632431394076066	0.691645877278197	0.442436632471475	0.496508701774637	0.0156785928719602	0.395755424317927	0.449108686071286	0.461609305888008	0.222222222222222	0.658485201573807	0.527068261616378	0.362813248496798	0.508175186958383	0.534880102674419	0.553857932772052	0.447913525108973	0.516090741233592	0.364285327562162	0.546284647624215	0.331555688794808	0.404877574047357	0.481732846156908	0.622619133630792	0.682699806077006	0.518580124508943	0.601682184988358	0.811210004482697	0.0748810678931003	0.50389664272715	0.588812449921733	0.170868477252075	0.175881201957711	0.172581699952427	0.175234118303399	1
2010-05-27	0.267450663013989	0.500462371686719	0.852674875315327	0.347967192530636	0.483627876109087	0.56445702895272	0.525436795829787	0.203757030881909	0.464542160296928	0.542258823238106	0.629950961108891	0.74332858222488	0.442111515175984	0.458962357794325	0.0159446776493009	0.475584592346091	0.471371475026678	0.531204280716213	0.333333333333333	0.668079268229046	0.561416726013816	0.34849226013159	0.499756008647519	0.527560627347599	0.55023016361953	0.450897031164667	0.466709647677728	0.255200128087931	0.64924783332144	0.318910690341037	0.461522537268327	0.652032807469365	0.629826651864942	0.66546739258751	0.554345886000648	0.610486826857056	0.816923305464359	0.0666861381517636	0.61177462155667	0.716047373609947	0.173120305817649	0.175516564767762	0.174539427184828	0.176019919510496	1
2010-05-28	0.245230203373626	0.479322469445808	0.859455934591415	0.249045639285457	0.516898415751846	0.605570950085745	0.582320453862865	0.192250393537004	0.482123105459032	0.569881621785169	0.63083683966713	0.768758630377838	0.441558376158443	0.451947985421093	0.0161163820198887	0.494027306442611	0.464603012234091	0.580180824645663	0.444444444444444	0.671777029287509	0.551778081914307	0.331446536193439	0.491699248222488	0.519978846008819	0.551767448135659	0.458482065819029	0.448252216555523	0.412517995202157	0.568294356820524	0.215737081487849	0.524999094370237	0.750954360714543	0.670205991633378	0.667969147290873	0.630292193922413	0.6224393156128	0.818431695544378	0.073917381291658	0.614734467359538	0.644888264610651	0.175223351664682	0.175739286294393	0.176695755537058	0.177130182881445	1
2010-06-01	0.243718284266223	0.447872782093841	0.866742970102147	0.156398149957322	0.552605976488478	0.565888431450368	0.6453306230154	0.184869196643259	0.45528290583416	0.601156849664601	0.631536755078968	0.750837585930364	0.44655853431988	0.45425724405457	0.0163553869087259	0.528622277117906	0.49008416962387	0.61969053811887	0.444444444444444	0.67033715299392	0.589092955605528	0.31212570538119	0.486076513138442	0.512708721921373	0.558157921632505	0.470204059889249	0.441885634956662	0.45963004080128	0.575260884392477	0.218615946982602	0.591536698347485	0.843601850042678	0.730443590164169	0.690507206930203	0.719962799410819	0.637250824061887	0.813924730695657	0.0796617745812558	0.624194694009317	0.64923100620297	0.17725562443555	0.176220387434859	0.179085775987511	0.178561528890135	1
2010-06-02	0.240520692201886	0.4186695009813	0.872467590109572	0.0707972545874004	0.579781554876121	0.6113031490809	0.683443289846535	0.190272389844543	0.476386784648294	0.62216989502466	0.628750158920638	0.745976588753272	0.455514891061979	0.456073739166094	0.0170930987382551	0.572493208053447	0.51549851030344	0.665860629937001	0.555555555555556	0.67414172806984	0.626439493752358	0.293014663813324	0.484521716837802	0.506559499794637	0.568524646137374	0.469224615873207	0.407775467417197	0.463687104605566	0.562716725445461	0.21141830788084	0.59961144248249	0.9292027454126	0.801385920450426	0.73011161872011	0.809160186899193	0.652909024510412	0.81865148038382	0.0687809538392613	0.625989296068873	0.638948451903017	0.179960981328276	0.177063949564829	0.181431437425665	0.18014568529574	0
2010-06-03	0.233442750240197	0.389860148300066	0.867062572021882	0.0935699276368345	0.568716510659121	0.585105497194634	0.657619055361161	0.200442931329253	0.485381469283279	0.613292239692035	0.629068679195268	0.719360480619987	0.461443775023613	0.509910178506859	0.018155012326571	0.638096278262472	0.511417353934436	0.705951726111454	0.555555555555556	0.669767270093999	0.620482497731054	0.280933981961636	0.482952498135319	0.501303909164988	0.58033433099591	0.462754625009752	0.373889630034477	0.470067707943522	0.57697857989386	0.206224515779582	0.593438402681335	0.906430072363166	0.840491262106782	0.770063194444466	0.83556375179812	0.663577070568721	0.819043775944203	0.0649338611619577	0.577932138138712	0.593047121105737	0.182706789001961	0.178139685967785	0.182795071153716	0.181331926921187	0
2010-06-04	0.232130890060754	0.371525615099762	0.860757994069498	0.290015485580499	0.478756918805697	0.507724016425321	0.549950422104764	0.176076511888921	0.449048379647162	0.556877447473496	0.62654699471151	0.668959530526328	0.465821246287573	0.509388464358647	0.0184806582151545	0.562656640042069	0.493832952369272	0.682438213370028	0.555555555555556	0.673220444433013	0.594955120228704	0.284440118934711	0.476624656724782	0.495743665100028	0.589174134245921	0.448105106442269	0.363951623339124	0.452486479439741	0.56457896705376	0.216971643882454	0.512829851817526	0.709984514419501	0.795915423302537	0.781253607608753	0.734196767085495	0.66159106740407	0.813717007297152	0.0791420055069694	0.466497713319979	0.518460151204006	0.183083768309125	0.179464345259792	0.181977673270745	0.181354567738207	0
2010-06-07	0.232396804762075	0.360080342746899	0.853383917144395	0.427747169403853	0.423216135197107	0.455195073417095	0.456885975459732	0.15113646257525	0.372425340252809	0.514439421289952	0.627147986368586	0.642934234708201	0.473420996117823	0.504019630994395	0.0182791905027994	0.50372573498371	0.490514889983398	0.646165738673581	0.444444444444444	0.662486902737632	0.590227116069916	0.29590663877075	0.471652946551457	0.490230256163578	0.59344933697218	0.426193535711702	0.37668172063323	0.48507228481672	0.537323674068297	0.225733905698555	0.461239964560324	0.572252830596147	0.716666908424802	0.761257041614327	0.604097503899832	0.652688843960534	0.804782707971963	0.0721150632284812	0.410302421005531	0.542209037826018	0.182225788567075	0.180091735493301	0.18022226874292	0.180708487102426	0
2010-06-08	0.232110355775256	0.356439855974846	0.845063465622238	0.471918566585425	0.406004473013954	0.395959758289152	0.432079486671887	0.152233332083005	0.340746221737286	0.504314699487966	0.626410059802161	0.668330386961173	0.485416136268592	0.432435668599607	0.017755776464298	0.503457797474984	0.520276099393315	0.600585336975952	0.333333333333333	0.66211779856893	0.637007162899997	0.307546503250538	0.464703036037772	0.484330476047329	0.593947073449756	0.426650718438886	0.403988397686241	0.505434634408278	0.53848253725816	0.225483596932234	0.410686125757352	0.528081433414575	0.647949576483636	0.724117843105458	0.516161125887291	0.643137125510784	0.803708101829796	0.108262794407071	0.405551410547293	0.583016115996336	0.180564724799015	0.180278788134138	0.178663793056253	0.179966732785576	0
2010-06-09	0.234851539693376	0.356626184399985	0.837958032163793	0.640104868316862	0.343995963184563	0.330203361483576	0.339129832700547	0.155775965960026	0.282038540521209	0.464020755070908	0.62757999784352	0.663099637168292	0.49357721041154	0.438697698225085	0.0174177203632192	0.472774479743098	0.48480842167246	0.528510336527069	0.333333333333333	0.664087834574327	0.581665832430116	0.326762655049454	0.458816926723737	0.478349523696431	0.589438613748761	0.426809643863097	0.402181118012556	0.41369754767994	0.52734746162522	0.23288884522148	0.370428065701468	0.359895131683138	0.541654594317684	0.662530880092237	0.385336293113705	0.626909246788227	0.795669292934226	0.120233941338152	0.364983227440436	0.526687471312155	0.177567593075647	0.180131762463455	0.176146682335501	0.178548283458098	1
2010-06-10	0.230240060403448	0.358299888262441	0.844412691955825	0.43954303397401	0.429772581893633	0.354555407205069	0.471114735816869	0.150631534001952	0.326565984250459	0.522082347114556	0.627907557233637	0.711562897203338	0.498884546465241	0.520236629470934	0.0170244004041182	0.461569142426286	0.494330644886958	0.469341908513471	0.444444444444444	0.668206955633395	0.596112757131336	0.328645953627024	0.456819744080484	0.473136855480099	0.585310092603041	0.430196761404643	0.388336113382554	0.345200533148201	0.620812197450479	0.207578641040262	0.375885328673802	0.56045696602599	0.542917641368558	0.621910506421958	0.438840685164536	0.624242505690482	0.803348918743687	0.133067767631495	0.482799564027647	0.693040766923193	0.17574621049191	0.180597581322971	0.176231271980868	0.178355517036206	1
2010-06-11	0.216616005882716	0.352867887446433	0.848950159257387	0.429695776620931	0.461879294212129	0.409417208527655	0.531334456450966	0.14404808303802	0.393333501330105	0.54602371534652	0.631479580772438	0.757297509779118	0.505542421036928	0.597532880946685	0.016943597448912	0.458709684250231	0.509393266186555	0.459728141617454	0.444444444444444	0.66832871584918	0.619016173501721	0.324830835109998	0.45935377356848	0.469509649354869	0.582951948197165	0.428698554947144	0.340322743088682	0.279800188013948	0.611545749036676	0.203415736132143	0.412438169872129	0.570304223379069	0.547300959216551	0.596348923788275	0.479538570900525	0.626288147681165	0.808742693792271	0.151878311216879	0.54039529188427	0.638989392142201	0.175392328192679	0.18060921993167	0.177011033514031	0.178594961480554	1
2010-06-14	0.211379390771519	0.334558052392993	0.853963199988789	0.404282109053258	0.470230322159582	0.359601608661894	0.542076412557402	0.145651380878112	0.384661369354284	0.551539681681243	0.631839431980423	0.722638934375265	0.510103937666335	0.592799853677798	0.0169197286945687	0.440748749019198	0.515631236944153	0.477255902373867	0.444444444444444	0.66881229704656	0.628561266349223	0.320645080286806	0.46552762374363	0.467930662626227	0.582141192768328	0.42435547454323	0.310717450002063	0.404836505075456	0.591884040384721	0.1974996456195	0.476603890282149	0.595717890946742	0.559362475000208	0.583486762485063	0.51932138503183	0.628903981622973	0.802764884687374	0.147743795154297	0.553624652189275	0.611915760044436	0.175874766692079	0.180419984270225	0.177716561853321	0.178892821419187	1
2010-06-15	0.201989365588524	0.317208059924936	0.858827532361004	0.270470055821041	0.527095494627771	0.367677646763953	0.629298683172837	0.149443559865051	0.428388412621022	0.589410663226252	0.62906958423988	0.73280233631739	0.506816504828823	0.671904814185115	0.0170232588937198	0.454187003293291	0.502923937064411	0.518257207534276	0.444444444444444	0.668051777944377	0.608260396416074	0.308514994033994	0.466855840558875	0.466952050316037	0.584646821008764	0.419419300628611	0.284032904794498	0.327930671795077	0.627279396428178	0.203247101360675	0.499734277944533	0.729529944178959	0.615525190692033	0.59437040692732	0.615651895337561	0.638343724531295	0.808769478948541	0.129656931724588	0.602678190299541	0.666910366634793	0.17737117602094	0.1803370147101	0.179491438233196	0.179852768556416	1
2010-06-16	0.199732856678249	0.286428398269928	0.865343067600637	0.0209945102133309	0.595960971754928	0.44105075338653	0.730813461911195	0.163769990051389	0.499914250672395	0.639366426938473	0.631953751996039	0.769119059872478	0.509815659709603	0.671608575137753	0.0175923919544409	0.501863906213411	0.516294403803873	0.600124786893558	0.444444444444444	0.667758207648004	0.626995192453895	0.287416735136668	0.469810203060452	0.466802147358892	0.592245333914621	0.419447058151333	0.298149275727945	0.435219847263602	0.670548326773529	0.21421509187842	0.595057994210246	0.979005489786669	0.742683796933017	0.645682183989927	0.800249876131106	0.655882707062332	0.81623163820821	0.160466076786268	0.657950551529015	0.690234686050715	0.180844951125691	0.18057719585482	0.182497590792863	0.181639036400413	1
2010-06-17	0.192263173818116	0.26734228023504	0.872600026217181	0.0361560619712908	0.63310072039675	0.47458327031971	0.751969258117969	0.189106451282625	0.55077571007562	0.664070824394054	0.630356738351341	0.77488830719293	0.512606929711751	0.679843162343598	0.0191574153341074	0.571446687656504	0.51851759446682	0.65994598216209	0.555555555555556	0.667865192515114	0.629365577486282	0.265246907801464	0.472210914258876	0.46719658933299	0.604387451379427	0.415202023226837	0.325209498225202	0.510629367492879	0.644095881490832	0.192456670575856	0.650949417501786	0.963843938028709	0.822003779536843	0.707371637872271	0.878111224785844	0.675375015736265	0.820042466193335	0.14549811925889	0.653191442707658	0.654968377372468	0.183930192779846	0.181214055885093	0.185615735437096	0.183712188905933	1
2010-06-18	0.187210379225008	0.253260561603993	0.879123406590979	0.0306317066085028	0.650154718729304	0.557090546714308	0.746868523884888	0.198236877337339	0.591088992259683	0.665912044921243	0.6293187552157	0.746964500452994	0.515846617820113	0.680462337118512	0.0218081264882317	0.616398337079881	0.515465399890238	0.698723885562238	0.666666666666667	0.667906601482475	0.62453502558788	0.246697994041426	0.476464604571602	0.468423517262883	0.619349676428347	0.401365092530407	0.331814617102072	0.444487257652479	0.636582580898841	0.190654689203028	0.627406135640256	0.969368293391497	0.876870445474024	0.767507323149297	0.910028920821076	0.692800794071631	0.824218596319361	0.115368511994739	0.630358230273014	0.627256398158167	0.186899897511229	0.182532171798745	0.18822498880425	0.185699668065188	0
2010-06-21	0.19054289042321	0.248416642249601	0.872667629391113	0.254213524424007	0.594403175204914	0.457795333544412	0.671948054410121	0.196511371552676	0.551852360492278	0.626908938387852	0.629675726653256	0.700000064262233	0.516975177152687	0.601007826936661	0.0225296566045979	0.603534057067313	0.505279569380164	0.718813359185489	0.666666666666667	0.668589575329108	0.610434778216702	0.2406127383605	0.480610977154858	0.470293440598984	0.633214402497499	0.388941385175692	0.336024084723194	0.426841868012861	0.598498539358178	0.195446545855543	0.590637514284736	0.745786475575993	0.833043370898493	0.792413229991895	0.79289802190644	0.700244536499951	0.818026608728274	0.144987530712644	0.550197053215445	0.55891833964413	0.189195049603109	0.183931802872696	0.189024075365072	0.186809456064424	1
2010-06-22	0.192483838629499	0.243918717134807	0.878630978926317	0.159348583064899	0.625856054852194	0.504486038936979	0.693461560183991	0.207616283903497	0.529410294930441	0.643124591941498	0.62863830374282	0.706074594668416	0.523076136280394	0.603228561732508	0.023802142573166	0.667098622556498	0.541244602814815	0.723660771268004	0.777777777777778	0.668518747917685	0.662279919390678	0.231888959014744	0.485565408389057	0.472850890853517	0.646884255063527	0.387914590091477	0.329665645954398	0.461536334538411	0.600632756820479	0.196287728396005	0.575264739838008	0.840651416935101	0.837940803522007	0.810713957173183	0.779499587135783	0.709984331903514	0.818435472332508	0.117823816880276	0.554512122228545	0.643948126442623	0.191240303302988	0.185716450921277	0.190444141729629	0.188204655850166	0
2010-06-23	0.195797805964577	0.230725743844887	0.872241990123837	0.233590877376907	0.584354627187814	0.446106517695907	0.643169787142232	0.199011959663006	0.507669134492791	0.612738495684378	0.627693603422416	0.711496810927736	0.531755627427308	0.533884869163912	0.0245727374276904	0.600672462693469	0.548344921071174	0.688453220250677	0.777777777777778	0.668951832788455	0.673924369650162	0.231502553925068	0.489788266078635	0.475801619364574	0.658045919852727	0.380151891741263	0.333753776990431	0.488608636775023	0.591150057398784	0.199743240486078	0.53570994918551	0.766409122623093	0.814506625666142	0.81479531813114	0.72847278184505	0.712684042729657	0.817654693552729	0.10802423346023	0.499018679837309	0.570393713433824	0.191777629623171	0.187737649514306	0.190696409525963	0.188964901849701	0
2010-06-24	0.190379947860671	0.21847512578996	0.866303456354271	0.284376010277605	0.556269559784142	0.470047294352502	0.604412533957867	0.192861910460041	0.458309914716539	0.589448273473655	0.628648808276659	0.68458182831842	0.540216843754131	0.534340173121465	0.0246900628344485	0.569864948181093	0.547150251764794	0.647213467315993	0.666666666666667	0.66811782298678	0.67283939390376	0.235802954626852	0.494390666029126	0.479148289301954	0.665821780502635	0.37636489481776	0.32810326503513	0.439973536272762	0.616801346491108	0.178809840376367	0.514142686326056	0.715623989722395	0.780620409494211	0.805775835527842	0.67343234915602	0.711110810220621	0.81253470852265	0.0907616176886226	0.472851555078411	0.580389998938577	0.191363076791971	0.189083412664999	0.190389557130998	0.189326107553317	0
2010-06-25	0.181910972731729	0.201283859606445	0.861731209733889	0.343666296676083	0.523595374303654	0.40502494437979	0.563822087941397	0.189275976235446	0.412242736152809	0.568215227713528	0.627677854834288	0.690889079681192	0.550820697792259	0.549700340234754	0.0249629168721676	0.551506479020758	0.559857733000478	0.599580879396224	0.555555555555556	0.667899021971656	0.693400029252771	0.243990998396315	0.501484181831054	0.483345446367706	0.669744318824362	0.373134292383327	0.2951986733276	0.350408218463898	0.631031203127294	0.16760510543117	0.484072037561176	0.656333703323917	0.73670753083818	0.784548569001018	0.614089521738585	0.705806399831032	0.808873870395465	0.0863317814383295	0.45605725760533	0.576453224498339	0.190298546997888	0.190043432493669	0.189630402947887	0.189317146404141	1
2010-06-28	0.175937686548399	0.181210462409604	0.86659449453626	0.302419392176733	0.541440523885714	0.413874119699514	0.578071540345355	0.189076331585147	0.416785010995599	0.575425918125439	0.628257167111765	0.706473375803543	0.553427949133962	0.569310420588636	0.0250100530171565	0.528010325767617	0.540912928706984	0.569000594407341	0.555555555555556	0.667761830313068	0.66360094408893	0.248911653595527	0.507014948618627	0.487888166370825	0.671436675718874	0.366728991320726	0.275360844213106	0.337763034899817	0.64700084136058	0.163921021143872	0.473760934425023	0.697580607823267	0.722265556341962	0.765393418427293	0.609866882656071	0.70279223271951	0.811760763292502	0.0991292161006961	0.485731737186705	0.620913914213404	0.19002844802907	0.191063859077175	0.189510112977067	0.189521643474945	0
2010-06-29	0.182757389106553	0.177404243686171	0.857171813303592	0.615117799123699	0.388910999736131	0.391148780389578	0.415725043413946	0.190076048964888	0.366908455959631	0.491058896722635	0.625343318161418	0.623448697140777	0.550794146661617	0.551891092859322	0.0236555512596235	0.416267579382077	0.490714511058295	0.513478683697757	0.444444444444444	0.668183969414061	0.590256852800692	0.272671612080415	0.50642660313402	0.491396286420829	0.666201535154657	0.37386197489076	0.357720047393632	0.513243345419197	0.620471036921874	0.206943522413249	0.365367946820023	0.384882200876301	0.600184470783347	0.71032648744999	0.43993153548801	0.683502920040508	0.803859428999484	0.166625524119932	0.370448938607449	0.461464530543459	0.187474759007062	0.190807657937173	0.186505020085679	0.188083055334169	0
2010-06-30	0.181079906952479	0.181423594239792	0.851023975079198	0.854078970552826	0.342309571081877	0.323751844909484	0.362094149083141	0.195234098385469	0.319057086693702	0.462384579090965	0.625684913100777	0.594403027068947	0.5472999035039	0.481573538282447	0.0215593028851631	0.366312810125278	0.472764910444234	0.471721041459346	0.333333333333333	0.679547883138756	0.563384833397097	0.298717302565912	0.504818319688406	0.493858199716653	0.6548842451031	0.375275509241134	0.35357425593664	0.4423536408769	0.558508424670696	0.197983380588402	0.289830700912457	0.145921029447174	0.432861480734515	0.615643630397373	0.231151542272061	0.661480087447188	0.798796320342502	0.177272899241755	0.357607554942498	0.546873689964732	0.184666852887938	0.189663510181036	0.183382789871167	0.186291737004069	0
2010-07-01	0.191492293256403	0.196397997705112	0.842519570292437	0.843189495367537	0.313351703659359	0.317421670637609	0.337720846358426	0.205785146132763	0.304240205268737	0.445663013865548	0.625665130703391	0.665089412682162	0.53832726264483	0.412704012634828	0.0187541720217025	0.338523913854082	0.444695751962485	0.438527443011293	0.222222222222222	0.664319610435212	0.521456603871851	0.323672641075927	0.502667146682802	0.495366830815049	0.639103786933065	0.385627354668764	0.397448707672545	0.587344578084745	0.527506614598489	0.197596752381828	0.241990877106384	0.156810504632463	0.325228911230864	0.515230801078194	0.146482953379728	0.639603594739066	0.797759041825149	0.267338677346957	0.3639450646573	0.565425666056829	0.181702947786147	0.187961101366759	0.18056584631819	0.18442231345529	0
2010-07-02	0.195930677397727	0.21030280092291	0.836750929072235	0.884347121825113	0.298803458432813	0.351200239669744	0.332476272680867	0.217596148848132	0.3097654342532	0.437736357235964	0.62763839124372	0.680802708737833	0.523072935071227	0.355672325268041	0.0179463835613182	0.349587232261029	0.414503796285048	0.413980026080395	0.111111111111111	0.665173889540687	0.477435654063371	0.344992437163756	0.496977252574808	0.495354647521733	0.620805987857487	0.383837344337945	0.377276548700191	0.48285662931818	0.515626664513048	0.197593870394793	0.249226068805196	0.115652878174887	0.238672693266513	0.418300209642036	0.0987210110636922	0.620072709344278	0.797510442041431	0.306529784336831	0.388142602199135	0.583684684749536	0.178848799151729	0.185986474827279	0.178316526261403	0.182688892705848	1
2010-07-06	0.199265594286279	0.217696493015959	0.84186602638577	0.839180057024886	0.323841136693815	0.398775667513397	0.358459580879221	0.222788277710312	0.312769633981049	0.450600552620694	0.63028081746355	0.708469752713971	0.508209983718877	0.356194186960157	0.0169613765553924	0.340435694293463	0.40478257378745	0.378613707941811	0.222222222222222	0.665903399415185	0.464424584104423	0.357783910696917	0.491092845364508	0.494084137313389	0.602731163770635	0.376292429800459	0.347812318828754	0.463552061793642	0.497062811712067	0.185359458054626	0.295177684889884	0.160819942975114	0.197211600231999	0.339314995278338	0.116740477606401	0.606985151574743	0.795765493371257	0.232003094317756	0.445111496959123	0.623475882842316	0.176007661899452	0.184418719339082	0.177224513669211	0.181494394271716	1
2010-07-07	0.202995531258337	0.20955356624915	0.847308035328618	0.570865095849428	0.453607590265145	0.454908075533957	0.47423593612998	0.216930521374438	0.375675643852068	0.51904160031885	0.631921692616727	0.759287439294826	0.496759321687118	0.346856987865503	0.0165836573313979	0.410377258663576	0.430794482292134	0.416409199378961	0.222222222222222	0.665487935263546	0.504177782580465	0.34978667732736	0.487753701678033	0.492352300969029	0.590070019697446	0.366678530165974	0.331041651642967	0.414221679867272	0.511560284525328	0.206561012653589	0.367044757167194	0.429134904150571	0.266062728160155	0.310512695849742	0.287779828085065	0.610531203249727	0.802855808173429	0.274965224632112	0.590155852439051	0.723476569866784	0.176368772869639	0.183313876752481	0.178917461783587	0.18184629345513	0
2010-07-08	0.20880189403438	0.190661650650396	0.841171068551271	0.586369245210137	0.446699835562271	0.500325077795634	0.457632083900517	0.202906437482452	0.396842180470587	0.509648836839616	0.631886057155069	0.74952314081835	0.489126980732921	0.335933902017329	0.0162285309761636	0.417617335785445	0.441809316715844	0.465132601191083	0.222222222222222	0.666165627676982	0.519418131314687	0.344348175180033	0.483400009522072	0.490034031649587	0.581204188413679	0.363443884618987	0.332637198757229	0.416880002278018	0.48643801207922	0.196585138392841	0.404877221757721	0.413630754789863	0.306387853056128	0.305282409701347	0.373333547503716	0.612647403987257	0.801212206006068	0.269490104956625	0.57881979444571	0.595806666327825	0.177316285944369	0.182376422570835	0.179906202773819	0.18205740435093	1
2010-07-09	0.21117486413291	0.17311915759441	0.844773731082722	0.545479359833788	0.465338372429388	0.476180570608458	0.46936036251326	0.190353620046859	0.439528964049921	0.517315302109921	0.627831980442553	0.710222561625815	0.480495322484055	0.267815984016142	0.016446828825719	0.438600432566064	0.434676380298123	0.523870145245301	0.333333333333333	0.666219791154764	0.509812655836694	0.33737303461593	0.48019216742471	0.487492120036244	0.575836448766896	0.353918311443359	0.279547783423489	0.325614623002715	0.483654682414832	0.195425639589543	0.407149329315556	0.454520640166212	0.347976155805036	0.316204446063299	0.441069575078326	0.616486372961754	0.805445364828564	0.251485938174126	0.580673849667533	0.620698663876926	0.178925350427505	0.181693716834405	0.180934305343614	0.182432697465729	0
2010-07-12	0.20444464466407	0.152420136095624	0.840093933958357	0.563196501212468	0.434917672315223	0.423129746119727	0.431357734386101	0.183410020088622	0.444859596176386	0.49944816945058	0.62962519361562	0.704347785094294	0.472740324606416	0.331130618846075	0.0160726472600278	0.416900701058141	0.436501106051021	0.578789528439216	0.333333333333333	0.666143259948782	0.511776044857638	0.335801233953763	0.478890738750091	0.485179753165492	0.571969568360939	0.354393688177033	0.260826058400694	0.383874896214396	0.490414936834458	0.193264098370702	0.415921317780501	0.436803498787532	0.369330224176503	0.330884242210832	0.464452917075152	0.616389724617588	0.803545259246033	0.270889797991092	0.533382055298006	0.575145975791781	0.180420320563958	0.181008825235633	0.181057879450262	0.182431286362313	0
2010-07-13	0.214412364881823	0.150435668081016	0.830192536586319	0.717075850991181	0.368486650464733	0.473486273157521	0.360862535780762	0.188712102933167	0.454631836500167	0.461335159126549	0.625632884026194	0.656450892846259	0.461957369019382	0.245098031008289	0.0163169769215224	0.452809128807299	0.424822327527845	0.620082149404653	0.222222222222222	0.666516649998261	0.493780588118217	0.343525409501183	0.477527914051815	0.483037867684735	0.566987811169484	0.370720631941158	0.361488562597966	0.561390445586196	0.445446900967232	0.192001193702841	0.345371943778158	0.282924149008819	0.328227931223374	0.326430264594543	0.389543129482055	0.6089075509884	0.804564170517419	0.311943230012043	0.455830462760893	0.536833102793841	0.1808781901541	0.179807893936421	0.179816453230482	0.181703300030872	1
2010-07-14	0.21449414403418	0.148592947781736	0.836943937996157	0.674386794302045	0.381847601413769	0.437994841594877	0.379947914463811	0.193844348957537	0.464301718160284	0.470330106706739	0.629277434884706	0.670197331750436	0.451515846636479	0.322021590887701	0.01689113341659	0.485502060599501	0.435538960968808	0.605017597716727	0.333333333333333	0.666423246866236	0.509256274275294	0.3473305974195	0.47714270386584	0.481241826097831	0.562085404162822	0.377023377898801	0.371743042610889	0.464603137505901	0.463725762619102	0.193377858399475	0.370783843829858	0.325613205697955	0.316178309612272	0.319286173312977	0.374917044849298	0.604438777162929	0.805437273975746	0.239650224026116	0.458983091141203	0.613911170938548	0.180020209284157	0.179557520625973	0.179213102090105	0.18123080734985	0
2010-07-15	0.223842756976129	0.150420577768742	0.830085963814191	0.685155743831852	0.366035672284664	0.377976546267661	0.373844900643273	0.19882149066819	0.458036377907225	0.466655051140321	0.628738076643624	0.706661789682341	0.438934443515845	0.320248604437972	0.0173536233584015	0.496257973150412	0.42598349780115	0.581129046290855	0.333333333333333	0.66640663778266	0.495312063136411	0.351862392295455	0.478453647826507	0.480085869105848	0.557070700195298	0.378167112238404	0.381792130617231	0.483618284356663	0.466562760397079	0.193214951529551	0.373856337014913	0.314844256168148	0.304272481638804	0.310398492392471	0.36276303726009	0.599370381357413	0.804142692337631	0.243638187086753	0.457828224681971	0.587162808854345	0.179061139810205	0.179551697343195	0.178502218871932	0.180674759913193	0
2010-07-16	0.228138618283727	0.152117662756676	0.8214405328471	0.733103062894259	0.346604138447471	0.310353458451399	0.364801089084858	0.196225814374362	0.411351350830573	0.463153492751021	0.628723567453892	0.690917771348873	0.432327513186921	0.307229903441575	0.0176140254622995	0.496309138209787	0.461085924657125	0.542874853757171	0.333333333333333	0.66638703269118	0.54584967750774	0.357330888396914	0.476619312876152	0.478768088106512	0.551737461482263	0.382804562337065	0.424371376485951	0.589231841170712	0.469631358259787	0.192873655799647	0.371845906413152	0.266896937105741	0.279092371218488	0.295749343319081	0.331847296291659	0.593508758983638	0.797856174632928	0.181048343031954	0.455290090686157	0.583787717581697	0.177657179419333	0.179655049529737	0.177654534557334	0.180014599448842	0
2010-07-19	0.238469168156953	0.171051777492324	0.812922975238964	0.747606909119272	0.295219594489989	0.297157016684089	0.325230804965442	0.196088122719237	0.408690809070117	0.441935261415496	0.624918783115256	0.66850413346454	0.429734353608665	0.297214909163765	0.0178134867414945	0.459985647559462	0.462147711874842	0.501708687952251	0.333333333333333	0.666540644500578	0.546910140346033	0.368170446179669	0.472410879175858	0.476812185411208	0.544832338966114	0.389465046003512	0.452915008830852	0.572822351140059	0.439678107608758	0.193279919054665	0.24934284693447	0.252393090880728	0.257089734499926	0.278360099092834	0.310597454878489	0.583256173633916	0.79971089131989	0.203117835837372	0.430088775790199	0.549440475036193	0.175965787716598	0.179556072477962	0.176047744186508	0.178902544962282	1
2010-07-20	0.238768347255216	0.180497236600416	0.82186016604727	0.466016396351724	0.396001616414579	0.406672267502362	0.423308397613868	0.186616501231752	0.481179961548698	0.493825395997792	0.629594365021158	0.724339107727957	0.432668374564893	0.392701750621548	0.0179170324311661	0.439102420300521	0.49320250730288	0.495986834903008	0.333333333333333	0.664483852257074	0.594281188054606	0.364612003238289	0.470429739204086	0.474822994141675	0.540187879676803	0.397752882472672	0.480585876783639	0.441454766639472	0.530883861163357	0.169855460244663	0.33015069426557	0.533983603648276	0.343687341791437	0.296770314787747	0.457083955585233	0.584333119692781	0.809752954359039	0.255766050202565	0.520282045611537	0.680084373262059	0.175978785564015	0.179793343117987	0.176498061754092	0.17882806155682	1
2010-07-21	0.249112443456252	0.160586740074194	0.831717891396479	0.438212097364409	0.429781270731463	0.325568157025125	0.464096588429511	0.16376106325585	0.420807508820158	0.517846952830764	0.63609195211782	0.772307814739356	0.437833001629518	0.479440026851139	0.0173877988820755	0.45601693825067	0.50610909145363	0.509896354676018	0.333333333333333	0.670808348241509	0.613829357654	0.35719866818623	0.467549518403971	0.472614539464116	0.538345004029502	0.410759964317532	0.515204810738511	0.553917542039175	0.566183401336242	0.163065930059525	0.567827378747605	0.561787902635591	0.41141810657561	0.332510135381338	0.544845997507862	0.588846556053586	0.797183687692563	0.257964525082993	0.544596870023632	0.630999826865117	0.176196878480547	0.17947090284682	0.177364926980613	0.179078239339964	1
2010-07-22	0.236194101063969	0.142098421871274	0.837083101830097	0.266100854762855	0.493709390442037	0.356255839702229	0.556112166815891	0.143467100076208	0.427459126579649	0.556919234584894	0.627778776444904	0.747710155984535	0.445383370943254	0.493983077749162	0.0166697675229853	0.474896135039745	0.516360961434167	0.536418813677216	0.444444444444444	0.668102544782605	0.62871523290036	0.342988442088011	0.463935676140301	0.470073492005074	0.540494319410645	0.407340579627724	0.462863509343845	0.354117486491317	0.605965685916627	0.165477405649402	0.54208050085932	0.733899145237145	0.51846687083346	0.393425338941836	0.677991146826499	0.599345152861776	0.801344905955154	0.214267921669398	0.590974684140169	0.659506228252159	0.177290286865854	0.179538596377812	0.179095445911312	0.179915765301408	1
2010-07-23	0.2287684652486	0.125632332302351	0.84151772105231	0.232975103882604	0.505494027992996	0.418418049732224	0.594637870750235	0.122256637625895	0.464156493298922	0.566968194839878	0.629098383187278	0.732441582302125	0.448660404513751	0.547813213436568	0.0166738609492757	0.493782103030981	0.486102163138529	0.572780718712966	0.444444444444444	0.667899797505046	0.58327030483991	0.330622980585003	0.459328418750108	0.46705352617864	0.545475712328456	0.402317556545373	0.402236396203974	0.396453566483852	0.61850706905977	0.1627724510684	0.540584353940489	0.767024896117396	0.601745449325277	0.46288859231672	0.753839960219931	0.609072827183027	0.805985459518225	0.204009234829545	0.584346728194752	0.613479916795018	0.178740469469933	0.179561887803883	0.180470964461942	0.18072281373861	0
2010-07-26	0.220074414875964	0.110342391988354	0.83802123554438	0.256739541237998	0.494866502197238	0.451587431164627	0.602164152849217	0.105230566365638	0.487860224397629	0.564914050717514	0.629050411692995	0.7100787354938	0.453600835453883	0.540703245295584	0.0173375826488549	0.522845713778045	0.485837202108942	0.618666725822266	0.444444444444444	0.668054919111145	0.582895849736487	0.322462812975844	0.454092821881848	0.463515800793366	0.551717687350816	0.398724551272265	0.333076388718819	0.371298027733474	0.606437200482199	0.163490028319844	0.532760516354465	0.743260458762002	0.648718296581867	0.525471878228437	0.767221517101046	0.615918236866395	0.807447441665315	0.156227020972942	0.556442019126953	0.594900320782567	0.180719294740319	0.179706725907181	0.181228829182854	0.181295746744304	1
2010-07-27	0.211733585716981	0.106970191948777	0.84288305374897	0.0839076785263906	0.557876139890161	0.461519882189148	0.73666898748949	0.0929372277628413	0.524470615696042	0.60152713552182	0.630283695828907	0.725484404657109	0.460002036803252	0.538513860979569	0.0184853625934597	0.545614627779178	0.496686484466644	0.639820559212615	0.555555555555556	0.668749432918644	0.598572296105117	0.30851575161141	0.452249430010084	0.460290664588844	0.560473605330818	0.398719652885903	0.304210258043072	0.42863800375425	0.578307319109855	0.125443726857079	0.589009087888742	0.916092321473609	0.742187599714252	0.59957791652499	0.857197815037798	0.627881731775987	0.811852543159012	0.113386801631648	0.576721334433954	0.658642538060525	0.182480032733642	0.18060051342485	0.182891507018065	0.182399994805377	0
2010-07-28	0.207089973277363	0.107511597841644	0.838559872678827	0.200874138825099	0.505534666219689	0.485808139041054	0.646862418825286	0.0993801434106418	0.502816738017431	0.576955445619554	0.629422296929465	0.716539562968768	0.465591624384829	0.47990425573402	0.0192516484197396	0.534997530751017	0.494064984341598	0.648705639258205	0.444444444444444	0.670391245640043	0.594953217484968	0.303604808468307	0.448211252630032	0.456845355994589	0.568954432481307	0.38168749698988	0.269571135779754	0.377745020711724	0.5659944400707	0.13099113253031	0.56909565123885	0.799125861174901	0.76243680244476	0.655997583288681	0.825980187459938	0.632906250240815	0.807517238768161	0.114534755138775	0.520205415805062	0.566386218599725	0.183450667629967	0.181199514728557	0.183247608661657	0.182890395723626	0
2010-07-29	0.210792602800017	0.0961143963034802	0.833207233083336	0.30289790858023	0.460422079710773	0.501769593612297	0.571994581140943	0.101591773340843	0.470174573449308	0.553738391448013	0.626726711504239	0.685666483581788	0.475171130487221	0.470528924047758	0.0198508848480085	0.527559029590105	0.50282450219284	0.63361841197426	0.444444444444444	0.660056811095116	0.608303481393168	0.30493566764752	0.44449403451909	0.453292676611671	0.575562632254967	0.37903156080317	0.265044458959492	0.537587831724998	0.544321021590675	0.134194029278538	0.501846457160616	0.69710209141977	0.73924631924329	0.685576002317888	0.743399280036322	0.632837321475539	0.804762443043976	0.102070124420269	0.477946338101883	0.569146595414478	0.183319233044983	0.181684254426152	0.182797815862416	0.182914331893826	0
2010-07-30	0.206312577304282	0.0822495719892131	0.829480794354986	0.333687610682553	0.446929507960826	0.510017255370823	0.543943087500116	0.0974987183682856	0.45433141635006	0.544254400368436	0.627555914226697	0.693893502628721	0.4828294660059	0.423393762056666	0.0206197224440622	0.549523895061445	0.496885146945853	0.610982741276497	0.444444444444444	0.922232913159942	0.599446231408279	0.307601176891947	0.441444151402203	0.449797080446409	0.580267630881488	0.363073317803042	0.225196325118706	0.403991676093556	0.551578952200837	0.131868416896963	0.47100714526074	0.666312389317447	0.71271335506342	0.696102203319087	0.678206503821609	0.631488280046575	0.804658998272638	0.0984195537677475	0.471083635702685	0.592472742155873	0.182930684931766	0.182219213259629	0.182290566096715	0.182820050570953	1
2010-08-02	0.195209084849042	0.0761680461231799	0.833039668466958	0.169010702400038	0.514491650164715	0.529967283376959	0.641583748852586	0.0922845263463598	0.463747776766396	0.572160491577391	0.630215992559053	0.719193735016586	0.492497407630983	0.497109190014442	0.021529906722012	0.537574842948106	0.51639409775536	0.59099412782719	0.555555555555556	0.668023018604627	0.628195970590602	0.302282623868994	0.440999796206035	0.446905398198679	0.585473379866627	0.355692771341281	0.189033315718664	0.233616105802001	0.602027612025036	0.122988344529566	0.533356139759321	0.830989297599962	0.754246086115452	0.717509310796159	0.732661512028364	0.636560180512521	0.807037986968601	0.0561013708601351	0.522840801016752	0.656749784160702	0.183301897318256	0.183403399921206	0.183061601552474	0.183351914024676	1
2010-08-03	0.189153919276258	0.0723780168303567	0.836512059868477	0.166145360872294	0.515627299768518	0.554198527662368	0.631207038724866	0.089510109728879	0.476160054442187	0.5678205702936	0.628956199724365	0.721980064148922	0.502540516388687	0.477831052556069	0.0236119425412341	0.523656137907848	0.521802442807526	0.565382854308868	0.555555555555556	0.668086736862014	0.636378051654944	0.298557713377951	0.440067335983436	0.444392268150263	0.590667177627219	0.350206189854258	0.158015024200474	0.310366853116765	0.597669568869403	0.123174951016187	0.527987019250699	0.833854639127706	0.78296501219865	0.741730820220459	0.758483018905087	0.640459500824327	0.808459741660065	0.0199937307153794	0.518447468524392	0.603591941521547	0.182991349824267	0.184134152571502	0.18359492505682	0.183797671543924	1
2010-08-04	0.177493695659321	0.07149990980385	0.840007078778626	0.128557391393075	0.531223254714895	0.514796550922536	0.643414278707169	0.0936711425841493	0.489947377858137	0.573818511869274	0.629310366137554	0.711819090319996	0.51655229030036	0.543161591514701	0.0257308168745451	0.501253409342703	0.539618902253008	0.556974766883888	0.555555555555556	0.667881008348671	0.663409559212287	0.294500810433002	0.443735410146476	0.443167667283265	0.595930585954154	0.343703309825226	0.134347576353134	0.30840340425818	0.609340752295079	0.120867027934735	0.540179974558936	0.871442608606925	0.815628408782373	0.76919521881698	0.78795641077079	0.644706330600062	0.810066826395975	0.00250429650788317	0.533339968252045	0.614868576381995	0.183283129166484	0.184770284549342	0.184203652541677	0.184301388832102	0
2010-08-05	0.169454265134341	0.0706845247078081	0.837603511249259	0.174379933104758	0.506065061538034	0.526175253032864	0.606147252562913	0.0963189758509158	0.489278830909033	0.563241772176284	0.628668952604396	0.709135520174577	0.521674023196811	0.588633322167364	0.0276571146409895	0.488497343798306	0.51443685262568	0.564999283646331	0.444444444444444	0.667857426901405	0.625269435156539	0.294033239220705	0.448275859198745	0.443160800429483	0.600300032492459	0.331233884197792	0.0857087204717655	0.178601644824868	0.611009338638416	0.120022750350652	0.521802692628735	0.825620066895242	0.820925230571756	0.789339981558741	0.77302361876512	0.646034016250105	0.809665012577944	0.00375387649361946	0.516400170909589	0.587768548968229	0.183801665904914	0.184965345766952	0.184300827389068	0.184544061744391	0
2010-08-06	0.156409623998617	0.0594938359216733	0.833904611968141	0.232015788730683	0.474527036642105	0.503907113181701	0.565534514733206	0.0970584095333761	0.494776859906428	0.551444811461505	0.627718813267134	0.701435690929183	0.523014349806687	0.626936057861535	0.029400668122359	0.48303606395344	0.50129834013457	0.574819522990102	0.333333333333333	0.667669130898573	0.605779605708137	0.296749422784671	0.452961869478854	0.444159308004841	0.603094287935534	0.331555311645781	0.0844672814726602	0.274128005955161	0.625332111466648	0.106765216103999	0.449754977668522	0.767984211269317	0.803729346270802	0.796812050305867	0.729955805834365	0.644624750800789	0.811018478486331	0.0184813489816203	0.493015372025912	0.583825893496534	0.184211885368379	0.184976265985114	0.183977397087556	0.184529465286192	1
2010-08-09	0.135318951009033	0.0508215163543097	0.836424832219468	0.38266021417672	0.503599734740545	0.537913578453978	0.59966488674524	0.0988499738362044	0.508767293054629	0.561792162323757	0.629406889746019	0.70724368795571	0.520618791985613	0.590041900951352	0.0315035569547365	0.465143317151879	0.490946465306647	0.570072779269425	0.444444444444444	0.667828963065224	0.590315113146804	0.296493310563135	0.458386992310642	0.446120473671569	0.605378265862114	0.324342398850654	0.0499717743451768	0.181643582957824	0.6004910935077	0.085883562885235	0.478271233755936	0.61733978582328	0.738090433545556	0.779051839655422	0.623703576589266	0.645492860433695	0.813335230710445	0.0306516511780797	0.503975393181237	0.622075375221934	0.184197441561192	0.185156042080039	0.184162042951341	0.184737287144586	0
2010-08-10	0.116787345450147	0.0401580610700508	0.832667548379045	0.599621679478956	0.456289694061691	0.545764594678222	0.537674717935126	0.0946991278381766	0.518859679196849	0.542149048477834	0.6282087728462	0.704974316622177	0.516183233102715	0.47588635380124	0.034697135307648	0.469462541149641	0.48013050062608	0.5694348571447	0.333333333333333	0.668492733984588	0.574521958499129	0.300503251927983	0.462010017271961	0.448465657360685	0.606127205556422	0.303821270077608	0.0622336772161604	0.246183354314632	0.576991223189511	0.0891552380902192	0.372109264392197	0.400378320521044	0.616307128315876	0.725018039106409	0.453053578499263	0.642751392829841	0.814750805680327	0.0326462123427202	0.480718535334793	0.575253557400672	0.183833453334084	0.184816142759131	0.183720908106302	0.184597533933831	0
2010-08-11	0.123702029818418	0.0517840680449664	0.82751238733881	0.974774636630609	0.308870306198594	0.489108365729838	0.317616489591806	0.0952352140574455	0.475498612043974	0.476623779814408	0.625820279159488	0.663602977626489	0.509260402095211	0.478746304243906	0.0359652415185021	0.432403116250598	0.451729771668466	0.542889703507168	0.333333333333333	0.666119207410497	0.532096729030342	0.318864460993391	0.45873632141879	0.44964039865878	0.601911295032549	0.298489881910901	0.118235469229567	0.44423094977961	0.507088028308266	0.123748121615902	0.109806909079688	0.0252253633693908	0.400205150102554	0.614123720626732	0.169098476386364	0.627920932967307	0.808769750380648	0.0585278704954655	0.392508712230209	0.492212662411521	0.181986061520788	0.184032267856767	0.181203592134736	0.183262537384769	1
2010-08-12	0.129593479571049	0.0722358424970741	0.83195974035446	0.700320952164255	0.339977667823792	0.533067359146098	0.360974097138546	0.0981904730988534	0.481097118489709	0.488034836165127	0.626244758305796	0.676329053044109	0.502828282287598	0.398285096290396	0.0374644682264747	0.446571126253196	0.441112547191083	0.518286686655928	0.444444444444444	0.666017415131999	0.517005200763991	0.330008623387344	0.456463575853862	0.450093244632222	0.595567789222765	0.290438489773946	0.14360700539276	0.453399393631851	0.510745398122114	0.125230383878915	0.148904925651125	0.299679047835745	0.354836638758997	0.524475570983022	0.192860277746801	0.618351997347516	0.812471255031241	0.0858044544996601	0.434006780064769	0.622114422165428	0.180554656091632	0.18357227228003	0.179911188656205	0.182382093299702	0
2010-08-13	0.130411757960515	0.09122677591689	0.829009341366533	0.827770594122229	0.3027607742353	0.559316715879499	0.302057310950407	0.100061809830449	0.454021220197772	0.468928925997203	0.629375034015365	0.708004445978225	0.497386884155018	0.337875021259433	0.038141790139745	0.405435284390956	0.442539662997655	0.492641219547759	0.444444444444444	0.666183477861039	0.518448272415009	0.342670153227773	0.452915599757997	0.449695349848722	0.587155880100028	0.271417278006019	0.120148859592261	0.416411411206027	0.50026922506525	0.12761934199494	0.23130781111566	0.172229405877771	0.278757319906018	0.438351312139808	0.152043202265145	0.607197254542135	0.80856818491259	0.0766546755520913	0.426172803951053	0.56987908476828	0.178967256191383	0.182979089712325	0.178400954518286	0.181305601359835	0
2010-08-16	0.127071356670745	0.114513762235336	0.826361899577487	0.896945682314704	0.283177178531733	0.533918715035955	0.248515922993597	0.0911075555670521	0.433021993441253	0.45769250050769	0.627542480988452	0.699219602890716	0.493900190459068	0.257327132774835	0.0383717505256139	0.396652077219323	0.447151026413741	0.465986699759826	0.333333333333333	0.666578027803926	0.524881908330788	0.354240088751676	0.449939475210469	0.448739384504105	0.577389683867591	0.251811292208984	0.0925754961780073	0.322594686438107	0.468916279620741	0.109551690894046	0.248339569521985	0.103054317685296	0.203160917856492	0.354743627629391	0.109010475135533	0.596574906496935	0.807163419356117	0.0918858383584122	0.433170566663596	0.58471881541836	0.176929205220904	0.181944835247696	0.177042077704539	0.180231541415133	1
2010-08-17	0.128710977840957	0.118238204044816	0.829875751465498	0.657000007411295	0.370578592409109	0.434887840229801	0.339726108788301	0.0823505110788905	0.426685898861561	0.488859843707799	0.631259034822479	0.717740730444729	0.491906904076306	0.330288055496463	0.038060175307673	0.415657412747478	0.464370772997831	0.456279948272	0.333333333333333	0.66612081539787	0.550946625181912	0.354954707463546	0.450566574338674	0.448108971342197	0.569262232282401	0.233697525952784	0.100722938435802	0.408387580916132	0.506605460753013	0.123456627606019	0.343544321418897	0.342999992588705	0.239052964884771	0.311440511505084	0.233711415722097	0.594443502533741	0.807258306161734	0.124333580039996	0.507155601856917	0.655560786064166	0.175854563859475	0.181219908153565	0.177180250633286	0.179926018802627	1
2010-08-18	0.121633007240097	0.121696614296477	0.832699999764879	0.598998816663552	0.3913768675476	0.574249623347382	0.378442273497666	0.0852847582523626	0.425355318372371	0.497198755100862	0.629429025818402	0.723318325776014	0.485297278661592	0.406181181812742	0.0377248908697418	0.428970646357488	0.452758318933024	0.485601252890778	0.333333333333333	0.665438049552814	0.534091789811937	0.353027390606631	0.451203829101078	0.447741175821702	0.563146977151794	0.210205953487678	0.0862070204729189	0.315841413028716	0.526268674718612	0.12189667052807	0.376158280269196	0.401001183336448	0.28383947746654	0.298088729177066	0.338206320221819	0.594588931928347	0.807124389396315	0.120194104523517	0.534221418355611	0.615953691881566	0.176270553627295	0.180498623026645	0.177537610113161	0.179821676975589	0
2010-08-19	0.121633078838024	0.132242250452846	0.829152346289902	0.767205110827653	0.34150797982112	0.500817928556916	0.313838159682089	0.0912018076726749	0.410836251810096	0.477411057890487	0.627674639914998	0.702092576172102	0.477721905835682	0.40846835989341	0.0365870131475755	0.419566628539061	0.441908647955449	0.500360592737618	0.333333333333333	0.66588723306154	0.517711265853341	0.356463926764426	0.451135742537832	0.447432351519775	0.557353489731014	0.204135375493193	0.101784014363892	0.442254080826383	0.514340237959752	0.126110765172056	0.348396337021355	0.232794889172347	0.253206535271851	0.27857429681249	0.3027225138901	0.590615002270225	0.80476089291577	0.158702171497551	0.494855444180603	0.563943890838958	0.175994664052035	0.179638315122347	0.177006628611581	0.179313968719851	0
2010-08-20	0.121748394459443	0.139915349235687	0.825957840248998	0.779858246669242	0.337816657741191	0.408966877476496	0.323189082357147	0.0955955038854175	0.386825607353093	0.479295157906215	0.629142052538523	0.698993961552264	0.468897486641167	0.402228426199294	0.03402702222999	0.409068884272199	0.437628855015226	0.521810116624224	0.333333333333333	0.666452266395999	0.511455522612139	0.358817604956846	0.451523053058134	0.44726827528763	0.552102530766006	0.199993439938808	0.104437516487408	0.429649859812247	0.490103603649334	0.110497253731323	0.362720880783248	0.220141753330758	0.228234232806329	0.256912644971846	0.281023456318429	0.5875069555884	0.801611793778153	0.17807892838693	0.496330057798792	0.599726934654819	0.176072653392325	0.178877721415809	0.176594777117702	0.178866801163413	0
2010-08-23	0.127701303872715	0.156353258776467	0.822515479183006	0.968117046456547	0.280952291114317	0.345911047582139	0.259711860876844	0.104240661891758	0.356260855163293	0.456201081348742	0.626448668460954	0.697472913405666	0.459012343482754	0.328947422849023	0.0303769915175317	0.399783984856518	0.42913525678926	0.544588154782993	0.222222222222222	0.666550295774101	0.498061774668088	0.366513640363642	0.45204549475348	0.44724895003908	0.545987990082831	0.199812666156375	0.117773424221839	0.450924764284529	0.469924197682166	0.114909068380166	0.320908291564285	0.0318829535434534	0.143884099684281	0.213247169837944	0.170666632351338	0.580123472657839	0.797772556177611	0.247256995341749	0.454890075824881	0.555349805913497	0.175806881023879	0.177716822201874	0.175394277144662	0.17799255752204	0
2010-08-24	0.132962906660474	0.185126688198519	0.817505720837116	0.942537202273397	0.208656835798805	0.261299567491273	0.195081420238382	0.124443896315608	0.333452990239924	0.421877235991899	0.625717963105023	0.674560333834514	0.446625786417395	0.247188678405492	0.0290156118709147	0.416941410374221	0.415001177906836	0.535804350944163	0.222222222222222	0.666660821431826	0.475365685666068	0.381703125997317	0.448342557926294	0.44644011716895	0.537366639293088	0.20030678116169	0.185512276065264	0.529905205449661	0.434048972456312	0.124161952089939	0.205507988848794	0.0574627977266027	0.0968497421888546	0.167841091604978	0.135585234610178	0.566578933909096	0.79502577878509	0.263226861197734	0.396609655439611	0.528891406094106	0.174067815508699	0.176298992090462	0.173178508516983	0.176500128409412	1
2010-08-25	0.141472821484144	0.215244232989	0.822468105746728	0.752574912708503	0.273341318100568	0.366580837663331	0.289452794542112	0.136876090558598	0.365676796186852	0.449745045072841	0.628465167545819	0.696885884867854	0.436247724021678	0.328799320067633	0.0277015061200578	0.425420516810955	0.419314314432184	0.510868826169691	0.333333333333333	0.666542967228094	0.482804013149281	0.386869231061613	0.445134050886266	0.445105612247777	0.529165146821231	0.202441700094173	0.237956753203671	0.608060710731572	0.456178753345103	0.135610630654407	0.234373256086659	0.247425087291497	0.133808047062536	0.150375134087021	0.229915929727542	0.560636642006906	0.79949546604221	0.256315660479686	0.452915656374591	0.640079389366634	0.172597400746779	0.175767666130645	0.172415061114926	0.175670921451246	0
2010-08-26	0.144677874052487	0.233417800973677	0.818589559877032	0.854313680786616	0.2414068262639	0.335696796886803	0.269321560160659	0.146899050074505	0.350939812602718	0.43685171268818	0.630722686172318	0.712313434787177	0.42729459434597	0.402038289973159	0.0261973390824749	0.425329837962136	0.418418441992357	0.495805623708522	0.222222222222222	0.66655821341601	0.480504413872003	0.394225792330394	0.439633047643009	0.442859390948038	0.520798847814109	0.19751827753453	0.244998292535921	0.462943341132824	0.45027006650457	0.136557102449319	0.281766927781116	0.145686319213384	0.121859458049975	0.134591393802961	0.226341541845918	0.552946147642373	0.794327575240153	0.21381021418278	0.44633088936665	0.56968751879741	0.171210776082634	0.174929923305024	0.171276754813928	0.17464694213965	1
2010-08-27	0.153821974675412	0.260075590838842	0.823148909748669	0.737065019775211	0.271023087504125	0.390181831291419	0.320727868402714	0.16108440863763	0.384189675699312	0.452180978770856	0.625694849346246	0.705450741661798	0.426914086636774	0.339698089861428	0.0252010216723545	0.441951167658407	0.453455217997743	0.478933624354952	0.333333333333333	0.666570485020388	0.533148016131306	0.39608839657559	0.434699553535721	0.44000538820639	0.51362864431326	0.200300172227709	0.273894449007097	0.579766105385934	0.449234610070314	0.135932891662684	0.266643580814907	0.262934980224789	0.156058883538864	0.135917806273552	0.291660085291451	0.549528467942206	0.798696401826616	0.275496356251901	0.481100193335947	0.619633263594166	0.170052378460241	0.174385504336681	0.170841023976333	0.173986559571621	1
2010-08-30	0.156097542953888	0.271152076516325	0.826335593934738	0.644077365881484	0.290780477490267	0.347171041151137	0.348943075605189	0.160761225467426	0.395579907456583	0.46553338133736	0.632034525607685	0.715792269118015	0.426038480901195	0.403679224247931	0.0242873619619195	0.422070798709725	0.451066138464898	0.475900692035735	0.444444444444444	0.666492912114633	0.529693663876041	0.39461488603721	0.43067470069334	0.436859841231042	0.508239830473445	0.199057070621891	0.25327495170164	0.417504338739443	0.465418319098931	0.138039198660145	0.350033995769015	0.355922634118516	0.212298869743201	0.156287271431074	0.376225105521775	0.548879762718731	0.797498793901337	0.288287787430666	0.50785893729634	0.613753375007323	0.169575724927814	0.17401139507658	0.170762712900781	0.17356274099224	1
2010-08-31	0.147024725227203	0.282313467371183	0.829834034906377	0.589586511228846	0.30470848016288	0.347290763556527	0.371604786358903	0.157620461229885	0.415057641448861	0.476724944345625	0.628337937649442	0.71258341539341	0.42707418100625	0.417995910429005	0.0234617674008903	0.41935632081243	0.46198158983302	0.505356980741158	0.444444444444444	0.665960106234299	0.546352422198835	0.391177545812304	0.42551624764255	0.433238179374028	0.504780691319134	0.199144075293952	0.248005311833722	0.369746665269958	0.514319556645631	0.100954892749114	0.357051853424287	0.410413488771154	0.269388282413182	0.189646401637669	0.446135217367373	0.550028888529955	0.798927172785636	0.245085701483626	0.521521748602933	0.610200584615333	0.170033597901638	0.173365800690487	0.170855175438504	0.173295410753951	1
2010-09-01	0.148316022481978	0.2679564297677	0.835629237841957	0.229477050311417	0.45041780354251	0.382501323535443	0.503127572352698	0.143718322627724	0.456258317640821	0.535057334473465	0.631356059276792	0.743859783797605	0.433450937105161	0.518108022963321	0.023590546374929	0.481054575224198	0.490813738665934	0.539349678619181	0.444444444444444	0.660389071454159	0.590717817509707	0.3745627004592	0.424311048042738	0.430082629867237	0.506082780888821	0.206826611162581	0.319666744702684	0.509486718493696	0.544349818308655	0.134512038699407	0.490621548731175	0.770522949688583	0.436951032679971	0.269940460048039	0.67346116229077	0.562006905476608	0.803279986972308	0.269919342016722	0.592369357405862	0.692102525871382	0.171108244902536	0.173166372863314	0.172660195785657	0.174033880800186	1
2010-09-02	0.14997301330931	0.25275391707199	0.839083122176232	0.13783309076964	0.481623729811485	0.440602801248256	0.55095700201479	0.128610432885912	0.504133390001602	0.552325798889039	0.629511573006279	0.747264647334684	0.436454980273033	0.578835731788242	0.0251987182201417	0.493534961987497	0.48255225013627	0.580201456591236	0.555555555555556	0.66996000738852	0.578095486905972	0.35818886831988	0.424810054742709	0.427665104934408	0.511272923752368	0.210334633319904	0.301539891891936	0.486533292104386	0.567546714040789	0.132064183193374	0.52070194112305	0.86216690923036	0.581616680551928	0.373591424646354	0.826596786959619	0.574672172718937	0.807882046012508	0.232399484809071	0.595572010910596	0.625009211232111	0.172825642451149	0.173333049697897	0.174307213679098	0.174881679276654	1
2010-09-03	0.155161715087676	0.231856412473531	0.843412984414046	0.000465823657508828	0.57884578800912	0.490368642639901	0.689117629150384	0.123567582395631	0.558319001497603	0.602008993013749	0.631584064149852	0.736606618566109	0.440262451489653	0.641155211720179	0.0286793706682412	0.557381063521234	0.500800233089018	0.626879341592411	0.666666666666667	0.668003908843496	0.605179392768467	0.33413920112899	0.427834048866309	0.426378990801225	0.521613817803715	0.212442027986159	0.315750212844469	0.558155775741033	0.608752544188701	0.148961149633143	0.611854962704975	0.999534176342491	0.727460682686056	0.493221918616409	0.961965655978656	0.594406635268353	0.813624354847157	0.211606599141819	0.639011387076786	0.681508620101991	0.175302777941592	0.173997563217029	0.176996677591917	0.176449112656285	0
2010-09-07	0.148489733372756	0.214943192456726	0.840564944639542	0.077153019904948	0.559844396432254	0.46209024309702	0.682177038309831	0.115945695802286	0.56942957311442	0.596375429707118	0.629605925849752	0.729335299213625	0.445676215455385	0.637139350087752	0.031944341910554	0.589962250780886	0.508199218671972	0.660362993264521	0.666666666666667	0.668686976796878	0.616488119557991	0.317996914883156	0.428714929346213	0.425538832527956	0.534256186793483	0.213536933966464	0.279655480957553	0.407787148452487	0.581489135999114	0.143036825777413	0.603889319915899	0.922846980095052	0.797111644949178	0.59710720606092	0.967878991076613	0.608770186610216	0.813439275371802	0.154615281441629	0.591696736474758	0.591315968437936	0.177514153470421	0.174871691613939	0.17855816810254	0.177604462037201	1
2010-09-08	0.154546388182424	0.211166526710089	0.844942715738221	0.0552132609212359	0.625677264697881	0.47520514090153	0.773358018937199	0.12365329158445	0.581038013439838	0.633105183612279	0.630834623874677	0.724369919067285	0.454699301216064	0.648418011808975	0.0348527014063024	0.601858868799195	0.525949405475069	0.689015432014873	0.777777777777778	0.668137890063325	0.64244684225807	0.297704565172417	0.431256400881113	0.425411228852818	0.549888811051227	0.2156093401587	0.301908293790893	0.546665508407408	0.601369264282649	0.152590501057586	0.638556518630465	0.944786739078764	0.851435631100401	0.685185427461623	0.963630146011925	0.627224267248217	0.816030541500647	0.171963076402928	0.611623438631131	0.662558426240164	0.180376955305585	0.17654498344598	0.180831327432837	0.17922626331403	1
2010-09-09	0.152091595972783	0.212950746818081	0.848589050292501	0.120048549636839	0.627504824842106	0.492877081892466	0.730328649258867	0.145634981811672	0.543415623675217	0.629166982866345	0.630287813833932	0.726994884506878	0.466515311841257	0.713903605254187	0.0370240522608051	0.620402974471603	0.539187586009674	0.69726091211218	0.777777777777778	0.667817588003147	0.662711970516371	0.283086378713426	0.433293146253718	0.425745528760272	0.5665300895312	0.210569911369641	0.296191602930257	0.45866183933038	0.618317982754322	0.144870599788678	0.625900486695675	0.879951450363161	0.864335451367681	0.748373578727625	0.909514506969928	0.641727434212723	0.811576918786052	0.131354020949959	0.571428108294723	0.604400302363136	0.182217118447925	0.178013759609015	0.182382945293478	0.180573055180212	1
2010-09-10	0.148368532401728	0.208676452323704	0.851811095780638	0.109441043442084	0.631908760687744	0.465313892077779	0.706079410181473	0.161039888879924	0.528292363140203	0.627149586716718	0.627965362401752	0.709975247976275	0.482944949457055	0.654418742273007	0.0392074465122049	0.613416605634102	0.559791563990058	0.694913370297045	0.888888888888889	0.667788679580824	0.69481787099675	0.272523561064977	0.435729890042019	0.426535053188023	0.58291957158187	0.20647742619187	0.278135581615577	0.454623848395437	0.621216066640784	0.144335791388059	0.578857622661476	0.890558956557916	0.87675001993422	0.794800227144364	0.875505549389683	0.653248628401595	0.812851051443631	0.109448123368562	0.548586126368872	0.606601763386328	0.183840634633503	0.179697249858601	0.183499356216725	0.181719997016153	1
2010-09-13	0.143753544813372	0.213404142602784	0.855043430732575	0.0412134711838636	0.677349105584642	0.511076756751129	0.7249278035936	0.182641392777149	0.51550936537786	0.646998869571518	0.630266896403922	0.718924142561149	0.498248214159357	0.715445423094117	0.0417904665451786	0.629910021336424	0.56201452148108	0.678337426116168	0.888888888888889	0.667539959219301	0.696614997737708	0.259816224760284	0.439779701830274	0.428034365090806	0.599664669246834	0.207419082655971	0.264725304736497	0.439301172448489	0.658728544097872	0.133159476939288	0.585512121220016	0.958786528816136	0.90956250792637	0.837119706699563	0.886608835229548	0.666794068667448	0.812919410882643	0.0699714506143253	0.561969140694684	0.644429224102605	0.185035158692269	0.181547403302443	0.185118919624546	0.183138978003261	1
2010-09-14	0.137837365136712	0.21972019746706	0.858436812088528	0.0359556803662399	0.68945887045895	0.54683638452974	0.707541646822366	0.20006973104835	0.516521745313802	0.646517401136448	0.628948814536429	0.720816577374522	0.515256526709361	0.797001068481954	0.0444165820290814	0.632123595761757	0.574058136341272	0.668525431911574	0.888888888888889	0.667387410704597	0.715044175185213	0.250004470162104	0.443298089684437	0.429987646747028	0.615908026048406	0.209910495262627	0.260531566846316	0.369344007765032	0.694360737445801	0.0972881487232008	0.566536021664834	0.96404431963376	0.93332831508656	0.873566714865981	0.887370253201296	0.678169477457092	0.81469081111601	0.0706885302691801	0.555328450264234	0.614294209238084	0.186515674870492	0.183407751753748	0.186444580421618	0.184435001290384	1
2010-09-15	0.129143357722833	0.228065739138049	0.862006604206207	0.00502226478060235	0.714713573061237	0.593106505910012	0.706769418565567	0.219054268469276	0.539205012682118	0.655245652272723	0.629377902093226	0.717598629852521	0.532680569171067	0.793466532230789	0.047919561907178	0.597350594524158	0.576778423638099	0.646052090493559	0.888888888888889	0.667389158384306	0.71815082294986	0.240698221247917	0.448092078722627	0.432577408117492	0.631586997167459	0.210097333713889	0.264461220011531	0.382234513706822	0.688856850256203	0.0964283978023695	0.565466806412041	0.994977735219398	0.960296511045577	0.907208257932872	0.897928493700724	0.689245892242645	0.818848068822974	0.0648410910758234	0.556009927949279	0.62715271341989	0.187570097608804	0.185381645694019	0.187849196506658	0.185781350230748	1
2010-09-16	0.132620940640965	0.248454965486863	0.867428220456092	0.00266741203337765	0.777999674934889	0.667659982763483	0.745989044764331	0.244640214138305	0.589009364999345	0.692442147367041	0.631018252538759	0.742371275190113	0.551134437485096	0.801485574063863	0.0521182122778064	0.623266945504763	0.594927101259235	0.64649352540171	0.888888888888889	0.667339260618296	0.742854499688878	0.225498249654291	0.457867362802721	0.436743620549697	0.648442392144355	0.218772453714359	0.331804037995374	0.524525697668671	0.732906496871827	0.0887017829133963	0.590026897585036	0.997332587966622	0.979122164272875	0.936158384379859	0.898432027070944	0.705513328972316	0.825870484338749	0.111190099039361	0.603351964581171	0.67354710504127	0.189520040904285	0.187291484660426	0.190316773960482	0.187723589168197	0
2010-09-17	0.126954480214514	0.270190080055513	0.862153147587716	0.0755811031921608	0.746534983245462	0.672767967551353	0.700108859664646	0.267946123253563	0.58664555079354	0.673658863301171	0.629987734678752	0.731138844992816	0.565705941039326	0.88229941253622	0.0529756037679787	0.574429264956168	0.588955309206827	0.646957159943611	0.777777777777778	0.667357299954379	0.734256322217783	0.21798604626965	0.465928605124733	0.441803751841549	0.664109152146736	0.22454197532795	0.377732437837887	0.48401724575734	0.720151445685458	0.0967453967654561	0.588579342379099	0.924418896807839	0.965451261216094	0.950721978434295	0.853359503900555	0.715515890879227	0.824392481789669	0.129480970776402	0.564771860026005	0.589389224916855	0.191247545508669	0.188980067866968	0.191672483870605	0.189153831884442	1
2010-09-20	0.132805076189932	0.299334112392849	0.867629423704126	0.0140041379143179	0.812911169988716	0.765902423936589	0.740718632213054	0.296727743985334	0.616827067115982	0.717317358588008	0.63112743524045	0.738031618185651	0.578683058884368	0.888214629529589	0.0549248051998385	0.626022001699979	0.591045125529271	0.659338047334629	0.777777777777778	0.667352208040469	0.732788650141819	0.202507482637269	0.47699483429412	0.448222851630535	0.681070674289961	0.232163009234469	0.418055030913955	0.568758863240085	0.75218250180356	0.108573676855672	0.619884834273652	0.985995862085682	0.978481732845252	0.964945644268009	0.861012815557434	0.732451235454208	0.830677082418765	0.188801305977921	0.616421435374235	0.688550115887406	0.193586027894216	0.190760353852761	0.194471550614239	0.19136461515172	1
2010-09-21	0.133521041141543	0.331787354126176	0.873183825251569	0.0951957889885527	0.81688288821024	0.754403010841024	0.708764308536187	0.324498557162701	0.585034723198884	0.706213714457034	0.630959036417058	0.745495192885874	0.589690805312059	0.946718729060853	0.0545015678235548	0.597121365906489	0.586732248083839	0.66734902254719	0.888888888888889	0.667352244321823	0.725956743950785	0.192615479471995	0.487897068484087	0.455693989475507	0.697504388713595	0.239217152109714	0.449715155201551	0.551800954101109	0.751452765366678	0.108978168714489	0.633084176562201	0.904804211011447	0.957970442170069	0.967321642609101	0.817853349924211	0.744888036046787	0.826457278935645	0.206549286204032	0.589693908637331	0.608473002524414	0.195855187674943	0.19264981985465	0.196467819316203	0.193244936882766	1
2010-09-22	0.129345378433994	0.358121553378234	0.878049950132184	0.00643781869710636	0.845042402271556	0.844015415574765	0.714888067593508	0.335193548435397	0.600843262803189	0.715879799737744	0.628667306938766	0.726554566444093	0.597077817159368	0.946539142651583	0.0564679247429693	0.618857165581997	0.578039650574773	0.682920424593568	0.888888888888889	0.667354386317686	0.710941997585222	0.181916417430828	0.497840411866784	0.463801310630537	0.713745519310805	0.238737421254829	0.45297990695722	0.415358721859321	0.731237589164353	0.0942807687025346	0.612488096905005	0.993562181302894	0.976215531998427	0.975226927639554	0.843657949836581	0.758119563869962	0.832405604720261	0.20479060539129	0.596537468596248	0.645166350074927	0.198387230160363	0.1944570437805	0.198758365605323	0.19531030148953	1
2010-09-23	0.135809640242755	0.389555444959965	0.88458576166813	0.109285436092466	0.852877054182987	0.780119528879975	0.697630426126715	0.344480662659785	0.58546012757497	0.706295767736585	0.630926535319879	0.730271723116288	0.606997138905752	0.949783129531246	0.0561555572782063	0.623393754708076	0.585106262534124	0.679956646458342	0.888888888888889	0.667354874957306	0.720744365179585	0.174957293225254	0.507042894452137	0.472258845315206	0.728730498688257	0.243992612300339	0.499963905498912	0.589396929859546	0.727012631147385	0.0954903494984082	0.609308752931984	0.890714563907534	0.951392700119326	0.971896873731242	0.79922205401186	0.768157151266236	0.831220391448054	0.248708616949125	0.573857162243649	0.615041996260549	0.200171059522149	0.196338496090493	0.200567490855007	0.197155028008289	1
2010-09-24	0.132396581376543	0.419333038473498	0.889985635023919	0.0358992304489273	0.874696905085277	0.839039983961346	0.699003994580482	0.351673126030479	0.576136295054982	0.710133342729021	0.629466150724104	0.729466049427635	0.614960671059858	0.951126037972247	0.0558894409520878	0.620133224971069	0.579433241440278	0.686614859178921	0.888888888888889	0.667357476912913	0.710749072227522	0.167672347244019	0.517801968204046	0.481330058239335	0.742783303561325	0.249073794001727	0.503070692128625	0.500087577927923	0.708483984035185	0.0828583951355807	0.603808646980637	0.964100769551073	0.961235410491653	0.973086993029005	0.81700540950835	0.778409641580763	0.832572403859253	0.237390781846913	0.581752935440765	0.638365434455995	0.202619322060838	0.198442669927117	0.202593442126918	0.199114494689631	0
2010-09-27	0.133296681877121	0.448891993729971	0.885971324102443	0.109156924449364	0.84182918333452	0.749019546169523	0.671618783818604	0.343484398098494	0.527197394932075	0.68336747894421	0.629270100955285	0.719623683598143	0.621338495358861	0.952333950359817	0.0542690421925759	0.60741404727515	0.575086579973863	0.672604045344986	0.777777777777778	0.667360550987526	0.705016017881778	0.166744869205595	0.527417267260714	0.490647154325809	0.754171292629532	0.247253382574594	0.467145273776424	0.526303732038416	0.708151381342744	0.0831689179970544	0.580269501167158	0.890843075550636	0.941452168011321	0.967026203607415	0.785870897779292	0.782950001933581	0.827654937540598	0.251213387999503	0.539630877634859	0.590523796957041	0.203764736498432	0.200198209518666	0.203664352506485	0.200564113513824	0
2010-09-28	0.155224578067688	0.41684727448615	0.877365933582722	0.24378231690906	0.728053909988133	0.787868606989148	0.62880648667665	0.320914948381717	0.533270040795051	0.637488258380508	0.620049137283561	0.675333442358559	0.625764250538685	0.827376485663056	0.0503612671140428	0.570579898177022	0.559691818222588	0.65206887311606	0.666666666666667	0.667460088392719	0.684627036363477	0.174833078312701	0.536134875258318	0.499968622158512	0.760691600058419	0.265351676150061	0.555502773650618	0.597547418778632	0.663658890909908	0.0987005548225218	0.49618718188943	0.75621768309094	0.879849140164425	0.941642380606428	0.697100959321036	0.77914339796742	0.832406845539159	0.468237250725434	0.486103041083858	0.55725148773902	0.204211058712502	0.201566543999853	0.203341447407525	0.201180889658732	1
2010-09-29	0.155654151310821	0.387091463759744	0.881270575581198	0.228771021433249	0.733222042936865	0.759494467433344	0.623666299618445	0.29276736451994	0.518219016381522	0.625048726661801	0.63100419329508	0.68065199381261	0.626571472393318	0.828811155394585	0.0448283047592963	0.536839199681283	0.54934035792253	0.623286828328832	0.666666666666667	0.66745813104867	0.669609549827753	0.182623101311506	0.546374157383015	0.509619613654208	0.763364297432374	0.266708373668194	0.503506136220974	0.467445389375771	0.665211767051577	0.0981705601073979	0.517626956303652	0.771228978566751	0.844178841084848	0.912361319639416	0.664020316415363	0.774931848294374	0.830945710801263	0.45498390701666	0.485160567721414	0.608080321662215	0.204156170891719	0.202814785066946	0.20324915421227	0.201753044624851	0
2010-09-30	0.167212118768245	0.353172573927206	0.87567196658634	0.380817569103719	0.643873683044034	0.689575367502863	0.581156482490107	0.269153216597807	0.48376250481243	0.58875791718327	0.62734680430697	0.694040181695561	0.623371406454513	0.797765522806426	0.0406208450725586	0.523931888507368	0.53394533709134	0.595237133079053	0.555555555555556	0.66756922530975	0.648817845836551	0.195890865147263	0.55356481342861	0.518881040747983	0.761346648249758	0.266051756639102	0.503347655887028	0.57112727678064	0.647344831926216	0.111211326611293	0.482234390474286	0.619182430896281	0.765719418397674	0.86565716376369	0.569018794400108	0.765339146169654	0.827748674871899	0.395515221463659	0.452925545709643	0.563969168616411	0.203409417262581	0.203337368714087	0.202314714076662	0.20174190308188	0
2010-10-01	0.168717694299304	0.321676461939848	0.871946086561907	0.421930944439036	0.615190609475728	0.620466659170347	0.559611239729237	0.240705494302379	0.44774537794748	0.569992517295552	0.627758736962461	0.688780991250069	0.61914374219969	0.747353608055996	0.0353520375300616	0.474603163639329	0.522698056167438	0.552010245395265	0.555555555555556	0.667682964531333	0.633221059345338	0.209626714435267	0.560676537660857	0.5278139047858	0.755468084908144	0.266960212928968	0.454269807570126	0.483221700348042	0.624042894257799	0.111250865596006	0.45368397136525	0.578069055560964	0.69862787863719	0.811276185518875	0.505927266942727	0.754647987369363	0.825005427476648	0.370979007692319	0.450951040310354	0.589401651069737	0.201993897088806	0.203857768772272	0.201395178105406	0.201569953522345	0
2010-10-04	0.171745284245489	0.300921344201746	0.868326965544241	0.598405659052401	0.530407176249169	0.53785942968751	0.508123112827835	0.219409835160733	0.411313755435707	0.537252293163841	0.626550031270219	0.693761128583474	0.60811050478756	0.698734810073293	0.03226178473039	0.45128293890306	0.48875667004481	0.518419208768063	0.444444444444444	0.668022472507571	0.586497229450259	0.227309029246431	0.565447498212351	0.535982398093488	0.745432467016798	0.264586361595016	0.410844766476343	0.46658018629057	0.601463786965255	0.122383800017454	0.381882477808215	0.401594340947599	0.590436065592819	0.737537517058181	0.386653127341813	0.739935987681337	0.821818819035662	0.276355070793942	0.432885010589867	0.560454948743501	0.200185503329336	0.203523692734142	0.199846564348872	0.200915585851023	1
2010-10-05	0.186480739069316	0.274543101012648	0.872500344126694	0.234414583298903	0.660581937534039	0.583074491085096	0.618169865452086	0.198578601150998	0.433327225730448	0.595366270095665	0.63268949528505	0.731815909424979	0.602274431306218	0.702168579622019	0.0285263375003202	0.484550489214315	0.526911628281257	0.516825085106306	0.444444444444444	0.667721545727845	0.637748191401618	0.227180195526267	0.573088336477626	0.544154280421207	0.737154468911847	0.269012947823588	0.390679948348919	0.486246161010112	0.638647979041679	0.157775160927298	0.479909444260594	0.765585416701097	0.64920724460209	0.708740564794421	0.537942614489297	0.739857541845083	0.826636190681376	0.302299653361296	0.55061598546252	0.713439025894847	0.200485935872298	0.20389998330981	0.201297799538516	0.201743828707672	1
2010-10-06	0.185580681527494	0.256446518400353	0.878077978445343	0.274841879747122	0.663210511325194	0.569251185835909	0.611668983597657	0.184122023080953	0.452531954066154	0.588019102328966	0.630614140782521	0.744165260291597	0.591273263210765	0.703975170859532	0.0266466347537167	0.479757189273126	0.501663228287568	0.52047619129183	0.444444444444444	0.667910824235305	0.603353019277034	0.228370336055185	0.580021165911581	0.552177179544004	0.729968336097227	0.273020449885575	0.412959777405618	0.458862049408266	0.609533426869329	0.146499432567299	0.517601874080297	0.725158120252878	0.673849501428836	0.698080277600903	0.599600596299628	0.738697791945109	0.827884076686678	0.292867475893603	0.549026530550319	0.605298717392528	0.200748814065417	0.204004789896179	0.202325573035427	0.202454580287405	1
2010-10-07	0.184128217338773	0.239642548831793	0.881473431661653	0.275299107170404	0.663548252994424	0.622542206718597	0.602837426817185	0.169792563387922	0.469330686288652	0.579331552314057	0.62886627807678	0.709858126966359	0.580097800466824	0.697025107868473	0.024797005425467	0.462475211271245	0.499971021911451	0.537954453718763	0.444444444444444	0.66781764041166	0.601081963877051	0.230821555363837	0.583946678086268	0.559436559391086	0.723345976333789	0.272182514808899	0.370054432233727	0.358421352300904	0.6152478696359	0.144920105331413	0.506227023554954	0.724700892829596	0.69011324378748	0.696608237938927	0.633304954519078	0.736442730834352	0.829214700820067	0.225821079327216	0.545911720656393	0.602976052620427	0.201538916034522	0.204026633174239	0.203017995170533	0.203040079291314	1
2010-10-08	0.177679649795637	0.233026786052714	0.886947426403737	0.0498524655084356	0.715490041308247	0.660183209003477	0.664285460166938	0.151257480596189	0.515080981663683	0.600802113036067	0.630082226892129	0.729981415964463	0.570311449285334	0.698000979370512	0.0246212455527503	0.493325178380486	0.502857301710143	0.572619654348071	0.444444444444444	0.667952756940284	0.604488830602256	0.227292023226105	0.588604496768632	0.566242024136806	0.718890422688519	0.279703948192711	0.393798044696945	0.452695980248436	0.600102681277676	0.129629003415625	0.592210795572305	0.950147534491564	0.782031221502392	0.727473245799657	0.77456553462479	0.739272547206355	0.83511443400667	0.241570034583614	0.579929244053508	0.653412461428335	0.203207199450388	0.204154000860857	0.20464907643484	0.204161214644092	1
2010-10-11	0.174562877471432	0.23305104066909	0.890503786348084	0.0880159718002807	0.728232656504112	0.640976331534988	0.670931278353847	0.141099086749082	0.514258181171039	0.599627689226799	0.630139886414252	0.733570015756181	0.560788988459012	0.689885529127248	0.0255202437053878	0.522733178232812	0.503255818436174	0.619165832265394	0.555555555555556	0.667912571717254	0.604891969642151	0.224532327262941	0.591079441075878	0.572216665086752	0.715999422825518	0.280786180570205	0.358739457381577	0.357286577802219	0.603292655513288	0.129677977263719	0.633818435944342	0.911984028199719	0.829585451979233	0.764525797007377	0.82115954406885	0.741634380881633	0.833104174943632	0.216822351826392	0.570126168272807	0.616017769509702	0.205622243262755	0.204459692515961	0.206047521315807	0.205249291959171	1
2010-10-12	0.177508588028162	0.224546459030552	0.895147547069816	0.0412185905936176	0.758418513846288	0.662655381846852	0.715666031836719	0.126744715910848	0.539208622410315	0.609997709013664	0.628639801168834	0.724144914338272	0.552225102843262	0.689674201673089	0.0269076562729588	0.536569062460455	0.502525549878337	0.630704522709719	0.666666666666667	0.667955637383738	0.603642876837435	0.219747677599227	0.594786567627509	0.577790648187343	0.714967968879527	0.284962404829129	0.361730461093783	0.442766698691332	0.599100596849021	0.127494301801927	0.617198514781105	0.958781409406382	0.8781176215727	0.806042198847503	0.864061157843013	0.745886487605937	0.837596950894537	0.10381197312225	0.567903206048812	0.635342082153357	0.207008867926899	0.20530980257106	0.207746611981969	0.206560542129169	1
2010-10-13	0.170336981658215	0.222373525396321	0.900386164507621	0.0711361487960787	0.772881797794548	0.58187007327331	0.727523625806007	0.118191196854021	0.509004489330477	0.610251781760396	0.629801227009535	0.727179906791618	0.544775139675479	0.684624738110788	0.0291200779825229	0.564862803527644	0.511682729491888	0.644552832861851	0.666666666666667	0.667931729176591	0.615395924820701	0.215810054098666	0.597002436186731	0.582724595550893	0.715220696802194	0.290536224244707	0.380781659008018	0.405397390862479	0.600764535675628	0.127671862544585	0.640481145254522	0.928863851203921	0.899713401043992	0.841201983097781	0.862189351729298	0.749618248667307	0.832814370139138	0.094329951859985	0.564647592262762	0.61897132667546	0.208590477220706	0.206239241924116	0.209265131198611	0.207845200725613	1
2010-10-14	0.165933379789887	0.221073903659554	0.904005238966628	0.00618502751441591	0.792013074881974	0.558110332350133	0.742944536499166	0.11678169089818	0.518885210214515	0.615566584479672	0.628925384150028	0.721649092507784	0.542848561964628	0.67651919947014	0.0325788449204464	0.58326267040654	0.533149158602999	0.655697571979169	0.777777777777778	0.668005545513721	0.643239746521227	0.211791275655077	0.59974196494255	0.587258711131943	0.716547987737374	0.284515796396316	0.34997745228535	0.367074337389885	0.59492703903066	0.125467523884976	0.615659139485962	0.993814972485584	0.937468413751547	0.877722631995871	0.89025828858487	0.753571919095841	0.836891042017936	0.0473048302006147	0.564021512733289	0.624645745503294	0.210481195943987	0.207590110535399	0.210800746639346	0.209183583858647	1
2010-10-15	0.181649411184375	0.242815389321903	0.911672402654747	0.00700593573113945	0.874787130724461	0.651945977647701	0.880077180022035	0.138181747770976	0.583936752455395	0.68173524129661	0.63357617086232	0.791185806599571	0.545334186009089	0.696016786476297	0.0373835865301955	0.672385528694632	0.57269752634901	0.66841836271512	0.888888888888889	0.667592351184534	0.691806057438756	0.193888343848307	0.606425008994566	0.592317879094352	0.722754212668565	0.292505297810339	0.437300955932991	0.591385501843625	0.652920736983018	0.166979591899535	0.677148805144822	0.99299406426886	0.962343205893914	0.910687977605591	0.89756576511017	0.76979976814932	0.846580493313878	0.117207075549968	0.648601037133946	0.725632089944583	0.213466773523921	0.209935196410911	0.21482172198035	0.211924242187911	1
2010-10-18	0.156978841838804	0.268636555774857	0.92075974514069	0.026915780511475	0.890983857110561	0.650998244217968	0.830447989653071	0.173964299222866	0.646379183645978	0.690483455017983	0.630472551732014	0.808602743192652	0.551724009331913	0.8215327284533	0.0419869585130325	0.628979379464273	0.595524539544391	0.675784848567255	1	0.667461592759881	0.720783662137646	0.178911918145163	0.612466857120841	0.597659709538929	0.732148943887228	0.304566135813393	0.531739618382786	0.464457402158708	0.685240949319619	0.153876083821849	0.670628994102076	0.973084219488525	0.971766390347414	0.935929678842869	0.884311919114099	0.784296558339649	0.853547145852718	0.121797026956054	0.639193364324159	0.634107678389705	0.216736900647223	0.212799960543991	0.218288458622055	0.214598196473221	0
2010-10-19	0.18416274185923	0.252400929620497	0.91051032178715	0.232241774022372	0.711938141729318	0.717363811264672	0.695229066875948	0.182302119401567	0.689951528277254	0.627921727843559	0.622900006308422	0.662583294174033	0.556930401324615	0.697908594777611	0.0439649211952805	0.583484218064906	0.571370700377731	0.676990886406774	0.888888888888889	0.667701510045104	0.692058770579701	0.181795360440967	0.614769328738018	0.60242648991448	0.738897459040372	0.320247347851454	0.618046249136082	0.659493390616569	0.648531033259024	0.184607987853417	0.552865754896285	0.767758225977628	0.904208850261579	0.92935115250952	0.760254446107826	0.783571611260127	0.858701873775472	0.197632350706688	0.526974629226522	0.519874817909821	0.218318525731542	0.214295664985185	0.218547613081144	0.215659333389114	1
2010-10-20	0.181360212837153	0.238071083115933	0.916509940518286	0.20714845147595	0.720224059923643	0.667391164452721	0.682403177467796	0.193220521697375	0.685569699975182	0.626920702268275	0.631012589982776	0.643875210065514	0.565602313761425	0.771341301779474	0.0446467181815499	0.588703194029207	0.587694574521993	0.67536524775204	0.888888888888889	0.667571422744486	0.713725419712544	0.18499086039335	0.616509844129251	0.606612828312516	0.743381750648396	0.324033178492489	0.589937015241112	0.467602624056327	0.669057770328693	0.175423951281692	0.558943687339668	0.79285154852405	0.86819459109909	0.912487785836943	0.710900016666866	0.782256971585371	0.858636869485188	0.200745068194421	0.517080461115581	0.612897740263005	0.219819276323393	0.215848869654947	0.218971162370225	0.216665225842048	0
2010-10-21	0.18690392577735	0.226023793187421	0.911925076501116	0.231518669125248	0.700196215157492	0.665200466636692	0.650342901558618	0.203182049555177	0.64910025200716	0.613795088588691	0.62910273716028	0.709948049407752	0.567325282785127	0.759150586408642	0.0436871330738026	0.557039910642511	0.550169646824073	0.666071173641482	0.777777777777778	0.667565513980927	0.663848993317611	0.191051990766148	0.615587472692164	0.609764276353293	0.745179885794134	0.317517080595494	0.535691562564723	0.497221160691052	0.670449488446813	0.174800288313015	0.540689820943398	0.768481330874752	0.835421028238731	0.889890646975961	0.675096211346891	0.778133992300117	0.856713397146403	0.247599940050682	0.490981282908519	0.592716203684078	0.220860688807457	0.217326373921985	0.219009975536694	0.217354506983823	0
2010-10-22	0.184060428421375	0.214019498068284	0.908825782919364	0.305512200088457	0.659232342851647	0.645915405109048	0.61472346490078	0.20910466565023	0.605538415350271	0.596027018757204	0.627394803268255	0.699873431901641	0.570161060276702	0.761067378313479	0.0426606369645809	0.53976078655045	0.5425386033608	0.624765028733463	0.666666666666667	0.667519826504733	0.654379603000622	0.200481997754619	0.614443959334462	0.612040431349563	0.743827116273032	0.30983322294007	0.456641058208709	0.419573101559765	0.679595796747638	0.16796293970289	0.506752427922094	0.694487799911543	0.786962314068039	0.858036636437762	0.620199813149719	0.770697292603	0.855167587592195	0.228720835434001	0.461661042676555	0.5823786405885	0.219810610715817	0.218301674326564	0.218541533368375	0.217647061256075	1
2010-10-25	0.172287466708396	0.206210863775207	0.912088730190076	0.299492939179785	0.673217933627462	0.661012505134913	0.616614127763889	0.215654665052486	0.551445354884246	0.598860775580879	0.629655889937053	0.707154546183025	0.573105434296052	0.759142166940233	0.0410856019940186	0.530027217089898	0.546984647882803	0.577290338493852	0.666666666666667	0.667605780341719	0.659854683314374	0.2077280439251	0.611158410269776	0.613157410083736	0.740572750074467	0.307323694079088	0.394096308256088	0.400073374864751	0.637778312358913	0.138693971431833	0.512071229026543	0.700507060820215	0.7568211608816	0.826357772974497	0.600961170059666	0.764717039430437	0.851920558193055	0.230845888858949	0.485343596016362	0.616228147749958	0.218487548503181	0.219282802560697	0.218559603359755	0.218067809243057	0
2010-10-26	0.166886920983267	0.190690507290929	0.908821895271277	0.340769955517336	0.656307847693484	0.6370046394161	0.59740842806008	0.210238942211002	0.525339649775257	0.587126647599512	0.627431078443346	0.710172432900651	0.574887006811517	0.707644809447549	0.0397599848389177	0.517826002577099	0.528271849653645	0.558640795445264	0.555555555555556	0.66764124436691	0.635656116417224	0.216088082305805	0.607668526906511	0.613303268166325	0.735484942706893	0.289493101205949	0.342168150851798	0.338204122708447	0.633374462299582	0.139957118869118	0.480750661389581	0.659230044482664	0.72188295194863	0.793133662022307	0.574268009913712	0.757459783520203	0.852676128246725	0.182773186825376	0.494078855597055	0.594841318697533	0.21827954121244	0.219974970137034	0.218381127380674	0.218307451934393	0
2010-10-27	0.168380238949203	0.176767114593528	0.905504567485997	0.381450376239505	0.651362446633705	0.652253661723176	0.58504154725278	0.206922027303026	0.508998339751942	0.579237017735152	0.628881484852464	0.706012498682823	0.575850577976967	0.662582423047088	0.0374493710258569	0.505702973957762	0.523262280407426	0.538884398811662	0.444444444444444	0.667651131436338	0.629236675785011	0.224374710948172	0.603003950866384	0.612420545966761	0.728965922682592	0.287531491848108	0.300843556375286	0.447799314044506	0.632322708042378	0.140220305230454	0.469792823187292	0.618549623760495	0.68396125452323	0.757845711558891	0.544323982116204	0.749952832236626	0.85284063275317	0.211994081033264	0.494648439519249	0.600479908316544	0.217889551651029	0.22053468388996	0.218209120540023	0.218474411249916	0
2010-10-28	0.173130904609451	0.159397596112578	0.900923102250988	0.507809863258448	0.593105676314671	0.694458523258091	0.548080271639541	0.195878224521172	0.506402655917304	0.556455197209697	0.626488860147916	0.69858412724524	0.574882122763315	0.596538499103674	0.0338135278719707	0.433153185493613	0.504117880947027	0.521439069244743	0.333333333333333	0.667976571167164	0.605079500729809	0.235625348793377	0.597406189291398	0.610515019889476	0.720493750348357	0.284134266525178	0.303060046506602	0.414661053174891	0.599928988469184	0.139369971047853	0.404380786164302	0.492190136741552	0.613238521549742	0.709817455349002	0.466139408047194	0.739628035002295	0.854199080725164	0.28676634632532	0.477175840193096	0.576871125829995	0.217271331664184	0.220747931073052	0.217469886782032	0.218268100871005	0
2010-10-29	0.17716822580222	0.143268757523124	0.897343812166723	0.663708205436111	0.506854325535489	0.678745435423856	0.487587629936277	0.178881575963328	0.468858763465137	0.524501025426175	0.628389022272636	0.686969945012708	0.571546950283318	0.548347504499594	0.0292364225466488	0.398201856379389	0.484676135467603	0.522465157895535	0.222222222222222	0.668970344709457	0.58061960329345	0.251165921101398	0.589606962819025	0.607319575883276	0.709308222500689	0.283644661145404	0.277240984176416	0.454161837276486	0.576334781648356	0.147531874544574	0.348063349530984	0.336291794563889	0.510025621082403	0.642038954154772	0.349129609809931	0.725308554183774	0.84963933415545	0.186646162765293	0.447951713766462	0.559767649448834	0.216333922261544	0.219746433852829	0.21594988957034	0.217535335477432	1
2010-11-01	0.171601114659441	0.128291978832916	0.900868046635854	0.739764619609927	0.554346906278337	0.714007040176611	0.51539786258309	0.148560984594615	0.457135459202204	0.536299474088393	0.628924274637491	0.705485183911095	0.56900375025385	0.542034945028339	0.0276112271816946	0.452662031097682	0.488093114565216	0.529213350631459	0.222222222222222	0.668964612683806	0.58487066904348	0.259584968684726	0.583905835310691	0.603541725694269	0.697947699282742	0.283327743322955	0.255387269583453	0.393697653617303	0.576161449252506	0.147453128882837	0.347914974552672	0.260235380390073	0.413865491138743	0.563537161531434	0.259405202957408	0.716594301204656	0.850412740443798	0.168554605706115	0.486376816160271	0.634935188669962	0.215660822349173	0.218740565476268	0.215708163019669	0.217359446623812	1
2010-11-02	0.176141067620175	0.11864248888556	0.904475760781886	0.483196590855908	0.621509670982575	0.693116232818174	0.58221524714351	0.13089441814323	0.467506101970446	0.56166126968288	0.630664268990348	0.732633268265214	0.559279324157746	0.532190352208579	0.027433868021708	0.472714320448541	0.464038995258034	0.533427861331484	0.333333333333333	0.668334287768163	0.555356043674064	0.25985844615926	0.581900691953629	0.600089833584839	0.68870044136387	0.281438443478086	0.241120365918551	0.37289480626444	0.591173021374672	0.154216499267822	0.460793132433131	0.516803409144092	0.442026143785584	0.52095931531601	0.368051865354196	0.71463084950896	0.8527182811329	0.0675657982563495	0.538716106271357	0.654193754670196	0.215850049081312	0.21873110193132	0.216796063614027	0.21790132415382	1
2010-11-03	0.180732900438901	0.116458881629196	0.908702192957104	0.312810165239678	0.660440321124687	0.734089015899639	0.631217292749085	0.115730421551355	0.507502735413929	0.575275511111721	0.629731030638667	0.735242581648735	0.54716098832071	0.537018312135863	0.0291568556369497	0.49422771854849	0.46463625218725	0.545155663702517	0.333333333333333	0.668213307105531	0.556306660875497	0.256489365861744	0.581056586304207	0.59714746605474	0.682179297574591	0.276925474594769	0.249668738498814	0.486015112083787	0.596176307766605	0.155814507724988	0.521044835320006	0.687189834760322	0.522074551834969	0.520308060978474	0.525657264509029	0.71593987820023	0.858142565915778	0.0594529615855762	0.56576710215177	0.636408588853706	0.216567916223969	0.218896319819301	0.218350823904761	0.21880010829708	1
2010-11-04	0.171344994554548	0.131023498276352	0.914043867988228	0.0992178077016359	0.714519426349047	0.733150364321244	0.717643140695365	0.104171232914203	0.531361203107784	0.599369568846257	0.631875251647549	0.743667133937886	0.543292693282135	0.521832605157258	0.0307944035497804	0.53096159019456	0.511019174012295	0.571331853371403	0.444444444444444	0.669921968848388	0.612367550023153	0.247841160219194	0.583400868553576	0.595295846186889	0.679333918362412	0.283425788802373	0.290938591284843	0.375374256011506	0.565781179107145	0.111415173092333	0.673294955983431	0.900782192298364	0.652252583343756	0.564976030876852	0.724515733464979	0.722061864920219	0.859980663866267	0.0570648120958692	0.603427287017991	0.655566751809834	0.218449986258081	0.219533175302799	0.22070629686832	0.220259649984777	0
2010-11-05	0.167478706490083	0.144547785162995	0.911040392128206	0.152299687537613	0.689928921913201	0.66010468912811	0.68246644026841	0.0964008549695465	0.513856410178901	0.585287220580352	0.629146265166918	0.729296951342412	0.53707822941678	0.473525864749352	0.032140590448698	0.51855685649346	0.503786517735095	0.604934964498426	0.444444444444444	0.654809285351512	0.603613404895114	0.244311684505552	0.58559575577201	0.594284815818847	0.678082697299674	0.275174340346194	0.254465632742724	0.215649460992739	0.547850666599886	0.108107865009605	0.669333000901585	0.847700312462387	0.719948546932243	0.61820896354108	0.790233384316883	0.724327068737852	0.857057295130833	0.0601843104271182	0.571181445726146	0.591708870444399	0.220782699467167	0.220236270485808	0.222001744410524	0.221302905454428	1
2010-11-08	0.138658292649482	0.15650678420218	0.913382944533994	0.0890218917234956	0.70493612617267	0.687922742090946	0.696558306152357	0.0914922029527652	0.505972957664223	0.587042300324261	0.628799569251711	0.708714301453046	0.531742119358911	0.58671565678917	0.0336366742927582	0.52974484944767	0.512081116677961	0.632710114398544	0.444444444444444	0.667956969396695	0.613631453048649	0.241105865015816	0.589467003691307	0.594305425686079	0.678037995878448	0.271120264737678	0.203931335195958	0.136640479610132	0.588317113552377	0.0742790425723172	0.626856882663032	0.910978108276504	0.787835251729883	0.677217956546956	0.849068288746823	0.726545455871331	0.85779357045404	0.0699858881636802	0.556002337402557	0.61696427303375	0.222868419738517	0.220948091499434	0.223224649252241	0.22235373553576	0
2010-11-09	0.137471843399181	0.159216161340515	0.910194141928906	0.270783139858101	0.647959761648267	0.628286840347573	0.632705218184448	0.0824263061547382	0.481991294146551	0.566417903117533	0.628722853578802	0.704973680476936	0.525623779513581	0.500420862808885	0.03356660972139	0.518494132153638	0.510455467932137	0.640349680011797	0.444444444444444	0.668575659998606	0.611918470101036	0.243482783698267	0.588628463472517	0.594142252158562	0.677425813224562	0.266260754457243	0.191267590076322	0.317404411110573	0.573740236192529	0.0788455010199295	0.574087225482242	0.729216860141899	0.767727783395003	0.709590750000725	0.769015431244669	0.724172402076081	0.855519182004856	0.117395681479967	0.510585927133537	0.578232470728668	0.223839063657991	0.221532551646605	0.223427454337448	0.222877234350706	1
2010-11-10	0.131907639132242	0.156972705777272	0.913388624690481	0.180108986185908	0.670336265645308	0.706846159335154	0.665167117241935	0.0773685263778927	0.490349056524181	0.572614960275439	0.627249174213714	0.707164608278196	0.522634302016976	0.513810176374791	0.0342129718037441	0.541109966185886	0.512379291752717	0.640462760838268	0.555555555555556	0.668088587000656	0.614067092993446	0.244027968709393	0.588438538357705	0.593971020934081	0.676850208580976	0.259433414645806	0.182682235776029	0.375389723258677	0.585859564086367	0.0786701727875896	0.537883269036875	0.819891013814092	0.786931189057143	0.73782592139218	0.771157034387468	0.723299765011365	0.858568826627261	0.137988226375648	0.515563879502456	0.621428757300139	0.224594474999449	0.222274938358824	0.224032840150222	0.223563703262993	0
2010-11-11	0.132746337250523	0.154889497039975	0.910384892757831	0.244277716874848	0.638586781008244	0.675358374806856	0.623292481189293	0.0712728117264381	0.494462750512551	0.560024082790333	0.629043323811362	0.710328259252823	0.519759481812007	0.513948645622931	0.0356306770791386	0.556328047807364	0.51042243524291	0.619060303418041	0.555555555555556	0.667998492716258	0.611814161672092	0.247575928060408	0.587778745349685	0.593692672014008	0.675471293565788	0.257378191681922	0.170644190606299	0.446076978389653	0.588797774989737	0.0769605092450917	0.519319551086737	0.755722283125152	0.776656997664835	0.753089720652504	0.73185784564205	0.719878529208141	0.859195686202963	0.111934132005399	0.495521652878861	0.589388237011063	0.22436048893228	0.223105409753656	0.224103689684508	0.223942669581989	0
2010-11-12	0.150915499782743	0.150351886768435	0.903768185550599	0.645126758988165	0.472066619731459	0.556512429360942	0.416271466587224	0.0716140268541706	0.472790756914439	0.510647380701197	0.623626681598011	0.659715762504236	0.513774074381569	0.419965948441002	0.0349208377267503	0.497312079092816	0.482551939240371	0.582161265781716	0.555555555555556	0.653146166241029	0.577913651799479	0.262810454192828	0.58254121350056	0.592347825574528	0.670249135728454	0.253869703011612	0.284791586799922	0.604212654863603	0.548048766731716	0.111328616578337	0.403297426977465	0.354873241011835	0.625653561395311	0.710948172265866	0.489035696366305	0.706423886334665	0.856407613274325	0.218809013665475	0.426650576545178	0.518425809376093	0.223046060746196	0.223618524740726	0.222072357139346	0.223111505169441	0
2010-11-15	0.151283742241506	0.146138391516291	0.90041258654702	0.691159206471341	0.45580958271013	0.460939256475652	0.400515205424875	0.0687885125956405	0.442264594644667	0.50797325662231	0.627843220508119	0.660374306094893	0.51082001280471	0.419245629560201	0.0336181564537162	0.467125998647667	0.48786126394883	0.543667508700643	0.444444444444444	0.656082916402274	0.584509325673007	0.276472397284909	0.576923160889134	0.590068252649619	0.66238026618286	0.234725876080289	0.268016870447345	0.458527466226544	0.547205814425804	0.111468680726282	0.377622266977507	0.308840793528659	0.50843034129904	0.642240056727319	0.345752365621805	0.693808953206621	0.853549052699441	0.225373131254682	0.433162519421981	0.592835548743724	0.22137343945102	0.223826685787025	0.22047943845119	0.222300405970626	0
2010-11-16	0.15942548620434	0.158578185839422	0.89494485394467	0.889156219632621	0.373029686876517	0.367794166657642	0.281425867890959	0.0741671563305833	0.407743435878335	0.477705741264705	0.625524151956071	0.682164260508028	0.509221304276256	0.40365303385887	0.0309532598276234	0.424685834996181	0.483912445600666	0.511712144271109	0.333333333333333	0.665216490335519	0.579647818032703	0.29476280321264	0.568771872878712	0.586498140226058	0.65119313292344	0.218755192733843	0.323066661421189	0.559818454934066	0.525291601131061	0.122303445204686	0.305203611639877	0.110843780367379	0.359077524513045	0.544689113785985	0.175772864044948	0.676962594261895	0.850258342817889	0.291475554204919	0.406141845523027	0.548000669234784	0.219280490508714	0.223261155003137	0.2181033298693	0.220915243749346	0
2010-11-17	0.157645747890754	0.173362905205228	0.890958687733001	0.875037830948972	0.357751916257175	0.358842749424637	0.284756476681464	0.0834615832073678	0.393102540388383	0.474095165504462	0.626905094918709	0.681345735386975	0.505985964844385	0.408355224318084	0.0283670333912657	0.394740451989733	0.469679113202611	0.47664484948744	0.222222222222222	0.664692825886598	0.561747735063824	0.310386167928946	0.560323310822498	0.581831903757599	0.638097931332016	0.2120303302752	0.320126719086497	0.422971922958992	0.531466009755342	0.120617194953245	0.282351510551842	0.124962169051028	0.264586257568239	0.446917229383085	0.113525794250962	0.66187641766103	0.849618916809449	0.299457812150149	0.420667919829153	0.591609138870422	0.21674845591855	0.222365912517295	0.216256427182913	0.219637623324417	1
2010-11-18	0.16447564599373	0.168809810876769	0.895069910504712	0.550830429236013	0.48313980379636	0.411436422151839	0.461335604013435	0.0840887691556499	0.411284612527216	0.52193519765857	0.632142619169363	0.731266694805684	0.502629555953097	0.47807785059715	0.0264587219785376	0.43727185540155	0.47880318240296	0.46613471296239	0.222222222222222	0.668685379588408	0.573298981985965	0.31131982759239	0.554503828936735	0.576852061583524	0.62731286550494	0.210448384736548	0.322205892381137	0.482462967401813	0.583362661563681	0.137030309850847	0.375847943424432	0.449169570763987	0.318184065320173	0.400305740776395	0.277062456200051	0.658582870411797	0.852368874326293	0.273392657186723	0.517806490085483	0.682152837332863	0.21556115150759	0.221649722620718	0.216937319897111	0.219642161646254	0
2010-11-19	0.162167042431681	0.16458193757177	0.891870306290566	0.620333384838759	0.456876934006211	0.426322861568561	0.426006604446502	0.0846813541926527	0.420639711457278	0.511966857883122	0.628740611128853	0.730391105218528	0.496906357734348	0.41752914220332	0.024426499561501	0.422470025536697	0.461749376504752	0.477962133894762	0.222222222222222	0.671529981386794	0.552386420922623	0.314507695558182	0.544276751881103	0.570676985611609	0.617838895540029	0.210783418813322	0.295435259381384	0.432086443066159	0.56259679520329	0.13563174907319	0.358648156163823	0.379666615161241	0.328921172803395	0.372951447623651	0.332457370341466	0.65365390962705	0.852126063388734	0.267584548371606	0.5174030496523	0.585791021122787	0.215373387653628	0.220892766334615	0.216981322960294	0.219420806978705	1
2010-11-22	0.166292028126415	0.145994125239134	0.895138351734518	0.349270964092203	0.544991396315888	0.512784206990446	0.568467978595674	0.084711378941292	0.457326984365716	0.550335228974282	0.631240212168545	0.721643466922243	0.493890911954373	0.41411221095035	0.0246114483241264	0.465469716254938	0.465598578625404	0.505507788367991	0.222222222222222	0.670035683089911	0.557492066476023	0.307882827136459	0.535994379534622	0.563962385278095	0.611978148803822	0.210800446537345	0.276589349871731	0.431605329701255	0.568495910507952	0.141247404141781	0.419390020710531	0.650729035907797	0.433559146893597	0.390968654127263	0.514772461009904	0.656946333641424	0.856480505119708	0.328434594166449	0.576295174817199	0.667924652825712	0.216286260855929	0.220509928402164	0.218609372718408	0.220117466084852	0
2010-11-23	0.170323177577866	0.128734013787401	0.89081964029571	0.538566816798601	0.474070354846199	0.493028039604198	0.46690814055968	0.0843235500131885	0.465230811752519	0.522401809793565	0.628842808213761	0.709998091917644	0.490982307378133	0.335827446903777	0.023972041558151	0.434563016460872	0.454018690905976	0.538484643466452	0.222222222222222	0.663999873370633	0.543246624935619	0.309545992065037	0.52968227716477	0.557238305617955	0.606919836609501	0.214313678089689	0.297090231726249	0.457411564563887	0.535186014611932	0.144470941068142	0.396981025702354	0.461433183201399	0.435242918174875	0.40356349304714	0.502247758289474	0.653871080387311	0.855538092074709	0.265146390098467	0.525861065385667	0.557228655427013	0.217317561772648	0.219974962748524	0.218578280507534	0.220074472892697	1
2010-11-24	0.168743770264361	0.117972662808138	0.894259370797426	0.290403134254215	0.547360717128457	0.525594017227387	0.591220286123021	0.0850608026041002	0.488220532100769	0.556635119917231	0.630836809417949	0.709367461371947	0.486557051963352	0.310636121731041	0.0238415040914563	0.469607166266558	0.469214505190135	0.586392036586056	0.222222222222222	0.663411182421191	0.561886585435369	0.302691318987522	0.525584091005226	0.550980985079106	0.604722837104091	0.214722498970561	0.285123581109944	0.358508976886112	0.537982702058504	0.147149295586112	0.485281177824293	0.709596865745785	0.525610453843577	0.443269245966356	0.629365115354837	0.657958861893338	0.858614463510375	0.225501296799897	0.565086796808366	0.662081150887206	0.219383055525624	0.219739872287372	0.22002121098641	0.220842912311021	1
2010-11-26	0.172712314488339	0.114877783971082	0.896234668495242	0.2822243065603	0.549654816436334	0.507999795269117	0.585029122946327	0.0836937074579995	0.491771462102894	0.554873332731304	0.63090265521201	0.725680470520053	0.484338998901601	0.296287160715096	0.0252387271869866	0.512245325285181	0.478305463977283	0.608355849443178	0.333333333333333	0.661122453972266	0.572779477262105	0.297693294330476	0.522216956847334	0.545253703372331	0.604378497882801	0.206017988651916	0.22547581141059	0.363027387335686	0.543407222553098	0.146895860322011	0.516180889755998	0.7177756934397	0.58879676075387	0.491631595507628	0.692368713851186	0.660952766018781	0.858260582905408	0.226718511328234	0.542216328468957	0.604598045378053	0.220332031478531	0.219619778304931	0.221031403009446	0.221498120547772	1
2010-11-29	0.179033394762446	0.10549264175104	0.899940947323928	0.205770991547576	0.571755045701957	0.606404365069766	0.61792538048971	0.0781853424074254	0.516766063499116	0.561216702814794	0.627942059691353	0.714521809627419	0.481126514712828	0.243117002451285	0.0273824788490494	0.526304215820127	0.478040399315728	0.625004759153373	0.444444444444444	0.659711874714783	0.572488120796766	0.291898835841519	0.52045580774408	0.540294543033674	0.605750055386901	0.206442126709193	0.239510034131213	0.55105427773462	0.545000106788155	0.147338532258534	0.522179401394285	0.794229008452424	0.658415229109005	0.547993528662513	0.757920991652474	0.664934380069499	0.862211267397424	0.13374976643431	0.546702225902876	0.620723546897001	0.221796665785052	0.220263194785539	0.222155782688963	0.222281774844923	0
2010-11-30	0.17618514330411	0.0967778668324291	0.89576847663534	0.359867267723073	0.480241581511476	0.542733601888794	0.477418118386612	0.0720630195281815	0.489016958768686	0.525070480106128	0.628321355542507	0.695112220530296	0.476046573025565	0.238878613155351	0.0293154591740111	0.525829632304753	0.463640504439995	0.612428129146194	0.444444444444444	0.664386295661114	0.555001688501249	0.295821146841543	0.516393861292523	0.535456922490072	0.605960483086704	0.208607213481497	0.268363162255867	0.510373790539611	0.532034015405674	0.155065259985797	0.477624144375154	0.640132732276926	0.649411191392974	0.582448566301052	0.697000048424596	0.661120637027333	0.857543834630671	0.130627260520296	0.481819675046915	0.547063403222914	0.221477435765081	0.220562332263696	0.221526087658886	0.222165657791295	1
2010-12-01	0.177895947133465	0.0980242732795011	0.899607494202923	0.104080884754504	0.544555710502282	0.517177467496562	0.593679317359734	0.0728705559043993	0.474808447849156	0.554188884349106	0.629979740001396	0.705691494717428	0.479490971508393	0.307996777359199	0.0315537987397968	0.557598981892122	0.509659263535805	0.612951475365257	0.555555555555556	0.658131689287903	0.610900058945286	0.292093001684658	0.514719848927002	0.531228160562316	0.607215670989399	0.209379758987839	0.280456247757407	0.49215205316305	0.545802672209967	0.162815906961379	0.568463819000743	0.895919115245496	0.735394808814061	0.635208910535385	0.799130613026282	0.663574089075598	0.857636866604026	0.0823140044957815	0.529368716062407	0.653724376750452	0.222585296980726	0.221640258507424	0.2223722285719	0.22276571069364	1
2010-12-02	0.177814125022353	0.102526407783754	0.903455544150495	0.0437872634736279	0.564572228322151	0.489666643058225	0.625295834267546	0.0751472288525792	0.487446041372037	0.562972638413229	0.629038221794575	0.730172419620893	0.48404160097463	0.374358846221374	0.0340202764279428	0.525554122826154	0.518750040967012	0.596687005019326	0.666666666666667	0.675947553838246	0.621913686707627	0.287508389485214	0.51385151113954	0.527659105321205	0.609540952142258	0.208115975306268	0.291242274344294	0.505843212177251	0.558498842729702	0.163095341159342	0.583894627182027	0.956212736526372	0.814400109202255	0.697755049472924	0.875299372322709	0.666958811912474	0.860643353469982	0.0767839633803183	0.531034890555626	0.619493357298825	0.223069184823577	0.222924894807705	0.223358315521854	0.223488356570999	0
2010-12-03	0.156211942121839	0.10670696125199	0.900611368744748	0.0765780384673344	0.552565680827878	0.466653043277059	0.609410365042434	0.0748407725052911	0.488045190137819	0.559006002693378	0.629083615792075	0.712432825745514	0.492096831748375	0.457609696138557	0.036535718372884	0.530649135706616	0.534476373194152	0.590546855454378	0.555555555555556	0.668357982727975	0.641678447942484	0.285659597452871	0.513695986886955	0.52477053928204	0.612007010699509	0.199774412091448	0.265383933976564	0.271936744625033	0.590645152665572	0.138102951075854	0.563274141914141	0.923421961532666	0.855278038373301	0.753615249601443	0.885189156120883	0.66828020331388	0.860462918406923	0.0620673861098997	0.519549719230444	0.595840058081543	0.223421613267782	0.223580673971017	0.223844485931911	0.223985604172651	1
2010-12-06	0.156906270179876	0.121228148222528	0.904340065568095	0.0967382809345181	0.585430539523708	0.494279492843385	0.664875647687209	0.0780255575052385	0.480964628411266	0.574184423666804	0.63019006454053	0.715129463561881	0.501107447968525	0.526983404323152	0.0379219899707284	0.510808157324957	0.547084445466256	0.580400292251224	0.666666666666667	0.668032574960435	0.656962757390157	0.281314977078589	0.515947391534236	0.522942061117771	0.615236733723785	0.202196625271711	0.277190121705381	0.475367283497811	0.605760744827205	0.138097224789471	0.589634754838607	0.903261719065482	0.87527993242823	0.797785340438067	0.868876019808723	0.67178519592098	0.859891133439604	0.0834417665773798	0.537887296029302	0.628603869757019	0.223895382775925	0.224557437868974	0.224822085509473	0.224751236868904	0
2010-12-07	0.151976251712193	0.139969052424295	0.901085498856135	0.236925897710692	0.550256841125557	0.436431809178469	0.615721763002742	0.0805953912147557	0.446294180745356	0.562790516661538	0.629623160284954	0.711693752051582	0.502397241931785	0.614880010588962	0.0378340334386058	0.524343778909473	0.514337055042227	0.593868132961986	0.555555555555556	0.66778269773097	0.616455839672203	0.281369354798724	0.516259413874286	0.521546130927884	0.617909769603146	0.205242721819817	0.270517450553329	0.341660827049016	0.620798052506704	0.125707965565258	0.575041181950536	0.763074102289308	0.838200032909692	0.814385178062575	0.775395250834311	0.671781314687883	0.855687645739678	0.0868065452028725	0.5164036150775	0.584108334560155	0.224915131804997	0.224910430198408	0.225005999195451	0.225120809346873	1
2010-12-08	0.147230340154305	0.150658922586466	0.903762086366174	0.178810859724349	0.585713424874667	0.50443452661144	0.671826080262312	0.0829230191623666	0.456852119571203	0.577913229315696	0.627170857844932	0.709605318610233	0.506992957919721	0.628781079818899	0.0379860402835175	0.507900711222128	0.529267545584917	0.589303508402955	0.666666666666667	0.667671085745082	0.634471454880681	0.278403572583968	0.51572965514285	0.520315883327356	0.620918757946394	0.20353194094461	0.244750993266823	0.367474863008485	0.636765850271691	0.124130646464743	0.553768417436133	0.821189140275651	0.834379523053433	0.824128063303526	0.755672407677629	0.674298155639065	0.859235737882218	0.086778924095118	0.527751907586731	0.629396709601936	0.225581006430093	0.225804217716077	0.225803785458084	0.22579389002359	0
2010-12-09	0.137270595945633	0.165435115766618	0.901316499646399	0.249210505403687	0.561797302986529	0.446656481556787	0.635428463253295	0.0869690803349705	0.447781654743837	0.56997341466001	0.630125401253333	0.712211075691371	0.508122014474005	0.616665287280427	0.0380788416366337	0.500987805425637	0.503122651359603	0.586737006212321	0.555555555555556	0.668000545885871	0.602587633207237	0.278600903529565	0.513629084048503	0.518881627420368	0.62334854297227	0.201030653813064	0.215749431205411	0.341525763092679	0.59781174886948	0.10686746495352	0.563086932857425	0.750789494596313	0.806515283007882	0.820969334540289	0.705064209335209	0.674266575961008	0.857362977486665	0.0959739126146555	0.509879512623821	0.590751823625703	0.225813547665386	0.226165227147489	0.226034226114094	0.226179100728534	1
2010-12-10	0.135818131756911	0.176392935012235	0.903499029938685	0.208506436745073	0.572745866145865	0.459868301674977	0.64424871013227	0.0902626076037064	0.456178603564041	0.573531036316395	0.628261559934278	0.707612147474467	0.513942917818472	0.628762870116034	0.038245839831717	0.495796799244481	0.521138705971992	0.587672097776368	0.555555555555556	0.667820444509805	0.624507669280327	0.278430163672518	0.510085425398805	0.516974976166884	0.625393485755589	0.198287868458622	0.182377106684001	0.37084733770868	0.60811977755368	0.103989423953183	0.540103402681704	0.791493563254927	0.802577185423094	0.817499102150028	0.7017104131787	0.674513544621472	0.859107815441552	0.0798046923881371	0.513790243785125	0.61028475444966	0.226264198735616	0.226569899832796	0.226380746446664	0.226600180346911	1
2010-12-13	0.129466507807095	0.197918669214206	0.907155677236095	0.197552675764008	0.588321501284053	0.45388613765644	0.646124506091387	0.0959962827492592	0.436695007934298	0.575967705757132	0.630541564982951	0.713305005833001	0.51768365238651	0.632957216265071	0.0382741208275328	0.528992025068428	0.504682416082914	0.585087267851907	0.555555555555556	0.668144825373558	0.604316317642707	0.277587722122865	0.507587473711437	0.514914456564864	0.627295889585446	0.188401369735445	0.216878851049387	0.476850807263586	0.584769767397791	0.0883876877611401	0.594678637438261	0.802447324235992	0.803890996123107	0.815640803392452	0.706618257037092	0.675314343569914	0.85584368124914	0.0745072509357712	0.517743924096908	0.613209226209957	0.226483737611918	0.226919258720223	0.226879425622992	0.227091660728767	0
2010-12-14	0.123778367528312	0.207724986252587	0.904237380444055	0.350994179248561	0.55799496005045	0.476483902382968	0.606563595618057	0.0961702465955301	0.422767637422458	0.563816205695943	0.627550933768771	0.708686372503816	0.52038753599106	0.650737875059062	0.0379083321614211	0.496769651389402	0.499439933992655	0.577826306226565	0.555555555555556	0.667781500649892	0.59809412877019	0.279522226794936	0.504295501841344	0.512560719502334	0.628334791749744	0.186940795325558	0.216056046436507	0.368830775732863	0.598257411469058	0.076534364793294	0.52437574969083	0.649005820751439	0.749585990375463	0.795587150496364	0.625446448336466	0.673798403775811	0.854789162439182	0.0882067826185368	0.503967632706199	0.589537619936363	0.226784173538561	0.227584501428483	0.226879109155938	0.227311075470319	1
2010-12-15	0.119213741921892	0.218222640077714	0.90770693176733	0.346234352947172	0.559119400620218	0.496426117074022	0.598058558238847	0.0864416622075419	0.407368114719075	0.558604880160981	0.62900513207854	0.705633421683157	0.522283641174818	0.651564920286755	0.0367495908445406	0.488759821590903	0.493467753320375	0.570197168494168	0.555555555555556	0.668264612626205	0.590906409137675	0.281575458814049	0.502153581705373	0.510218812787486	0.628634140678166	0.180266938286819	0.239196271548021	0.454634178415273	0.573247951711193	0.0598705983894636	0.52143650456473	0.653765647052828	0.715094389577908	0.770267914036584	0.589697312599113	0.672087425181417	0.853005482837365	0.113380556534726	0.501140073589844	0.603326113640134	0.226690278640802	0.227872722666906	0.226895776617839	0.227499863659618	1
2010-12-16	0.114610997579073	0.227970461486762	0.910384310774584	0.285713830576947	0.574071232008262	0.50162740219843	0.615115702344765	0.0664010998334328	0.402972222008985	0.557645708343228	0.628909622618503	0.710761618602883	0.527727275745371	0.657285877565675	0.0355910692307805	0.496331976739957	0.515398894075928	0.570012782239885	0.555555555555556	0.668162441216067	0.617373800782327	0.282608379323446	0.499812226012835	0.507843640288767	0.62860082570331	0.175895633847197	0.226854455118778	0.517925456012583	0.576004090724546	0.0599569512991691	0.526517516646391	0.714286169423053	0.713864476353959	0.752962301104851	0.609029012803986	0.671143871805718	0.852706992342657	0.100250472016883	0.509473708886431	0.611126096700583	0.226905489788837	0.228098345604681	0.227121495250426	0.227772155797981	0
2010-12-17	0.10532372974108	0.237022009938019	0.907167363459688	0.331300206999509	0.557654003655549	0.436062526182609	0.589637306166809	0.0585598115003024	0.390811426210675	0.55028148244557	0.628763812641722	0.708920351527003	0.529857920791188	0.663490461654211	0.0351982062954476	0.480508656887152	0.495856910577194	0.565559698657465	0.555555555555556	0.66879239138628	0.59376198534856	0.284870087410772	0.497905235347404	0.505534920034959	0.627970214373052	0.17290878444843	0.240453136992322	0.422456458010014	0.565805274687989	0.0592000878626821	0.504512421404889	0.668699793000491	0.69665068841156	0.735461249750113	0.597299336566038	0.669132532427389	0.850508901947386	0.0959210049613573	0.501811583897199	0.596573429845929	0.226912718459793	0.228329071729657	0.227117660132549	0.227910214702846	1
2010-12-20	0.104530625182789	0.231879808298215	0.910373346210217	0.296364354151184	0.586673763565226	0.472740403123987	0.632372505808147	0.0458836326561006	0.408508755541803	0.555054735851705	0.628491045445064	0.711117533590449	0.530912065998958	0.749584668536043	0.0369794699463847	0.497182630816298	0.495358803531643	0.564136567901789	0.555555555555556	0.66758125266638	0.593083543468444	0.285072659035986	0.499656681193313	0.504063199833901	0.627400875021533	0.172930088541499	0.252120422922266	0.396347568742096	0.595444757919347	0.0339576008210511	0.512278745155433	0.703635645848816	0.697738517209049	0.724170776849539	0.613614001084726	0.66876435977162	0.853010680431729	0.128558674646434	0.514785597700852	0.617851230458682	0.226990706672189	0.228478995969748	0.227500895493167	0.228234989536909	1
2010-12-21	0.0969283716008023	0.23096576044909	0.912504685256127	0.114430002377263	0.621113190761836	0.446078801612363	0.68370070126602	0.0418823187616808	0.435709945086212	0.563453085542738	0.630075763776028	0.716157660521221	0.530415890023037	0.73987120345038	0.0390280838842498	0.493239398927731	0.504317320665984	0.566771169136197	0.666666666666667	0.66768624433348	0.603664437196907	0.283248116062783	0.502297349911184	0.503451600107399	0.627421549283692	0.169133528101765	0.217757323793159	0.326739884079174	0.58168530505688	0.0164749344321244	0.666530408879854	0.885569997622737	0.763891259749049	0.739563408808458	0.723846984986777	0.670105991624131	0.855389381581534	0.0865614599070525	0.530106737926142	0.621450460524929	0.227555470135401	0.228914970931287	0.228236242567682	0.228764177796509	1
2010-12-22	0.0929598130572395	0.235100936419329	0.914715569772191	0.0652659316274879	0.637288299251446	0.478877854169937	0.716010930799453	0.0326603798644833	0.457838694323386	0.564172054757591	0.629474915977466	0.713752151023952	0.528049589863396	0.729838497621387	0.0422834121979921	0.50364842276368	0.498510821599669	0.574607867723219	0.666666666666667	0.667726227803353	0.596673640680062	0.28131010074183	0.50693746376462	0.503956487846411	0.627955146983199	0.162093458368292	0.193998376207898	0.334085036724309	0.578379450992425	0.0151376439972149	0.706984701164333	0.934734068372512	0.825673550073427	0.771230568352622	0.805074413757442	0.671636712207518	0.856814759192362	0.0744495989204223	0.531486772150971	0.611683076788973	0.228248787542995	0.22921702061918	0.228957961264863	0.229324247154225	0
2010-12-23	0.0922848164395254	0.237450976754676	0.912860230461175	0.239410574236581	0.590235941600887	0.41474641904135	0.642489187376958	0.0308882121154578	0.456801646900453	0.552512285290553	0.628664437158433	0.708043599549877	0.524684550169691	0.676227665225529	0.0443989539741544	0.49256003209165	0.499772100352325	0.575823786358447	0.666666666666667	0.667846449034457	0.598274194079742	0.282591116654524	0.511059158643727	0.505243491708694	0.628050063310253	0.156801646053309	0.159434630387959	0.361280756102435	0.575079236095394	0.0176887736258795	0.605098556489889	0.760589425763419	0.804235567983063	0.784914496304208	0.745893965703971	0.670552598525333	0.855416443179397	0.0658983844699659	0.510992141459849	0.58798237561471	0.228588230546614	0.229496511480212	0.229062953593218	0.229575960224357	1
2010-12-27	0.0908745091102921	0.22784860055418	0.914937212271848	0.121055626628556	0.610619213830034	0.444347031084072	0.670720620676765	0.0296304364535922	0.467443337479616	0.555933537628488	0.628086160769733	0.708140158375364	0.519398907055655	0.607325404129899	0.0479069049992048	0.492371196129362	0.494065295237497	0.581555964070109	0.666666666666667	0.66803001513261	0.591428860359902	0.282799971728903	0.512510050890287	0.50658395569384	0.628071585867172	0.157141267507788	0.1428086370934	0.327451656562344	0.568390556376926	0.0126797290303034	0.558936897853106	0.878944373371444	0.832506575980042	0.803832031411707	0.777501426428261	0.670314020177692	0.857110805849383	0.104636455260928	0.51592008050169	0.612828000386683	0.229176107936165	0.229796386104354	0.229393372413322	0.229924891957897	1
2010-12-28	0.0827494474644769	0.224335931656784	0.916399852567348	0.13093952525391	0.625591907655149	0.370329465391427	0.680651028241215	0.0295306788798303	0.463909911049453	0.557982810648161	0.630084464896892	0.711379922578206	0.517878414935668	0.588240206007339	0.0514656153701675	0.502578208992086	0.500833654398119	0.585410131711674	0.666666666666667	0.667640771270973	0.599412514263231	0.282591817094308	0.51470493212146	0.508126591125395	0.628144047113218	0.149647591646698	0.0999672353315278	0.281470206195699	0.579315399012021	0.00672720946323949	0.621417350965091	0.86906047474609	0.847799451170855	0.821742168399157	0.784954770995973	0.670421204590174	0.856160787815579	0.0759082476039181	0.515695077511503	0.610075766827491	0.229646994547918	0.23007296475565	0.229804138491362	0.230314967577401	0
2010-12-29	0.0775126032399151	0.221074167680632	0.915043505692017	0.166986287032066	0.619399873121515	0.418716798065479	0.676490097514655	0.0193448300588078	0.45263360289141	0.552796816396318	0.628798277676079	0.709390100328636	0.51517130680806	0.609902031708309	0.0552530752751711	0.501404343699294	0.497582408722454	0.581352704954488	0.666666666666667	0.667874938553278	0.595564606308501	0.283334278389893	0.514390943566552	0.509293425857778	0.628005305004177	0.140241834556545	0.0595466062575868	0.307187987488016	0.567285269732218	0	0.587477949314482	0.833013712967934	0.845031507021468	0.832723263789193	0.765738004004923	0.669744414033876	0.854862289651537	0.0544688556060281	0.508964238520849	0.600971129928449	0.22980444400193	0.230436888670185	0.230034585144498	0.230610293195957	0
2010-12-30	0.0754259818911087	0.20511303569728	0.913734089945697	0.347552330806648	0.563398266189383	0.400642380629635	0.590360442469645	0.0151694335089694	0.441864836869781	0.541270016944159	0.627589110204123	0.706758233394116	0.513220905691805	0.557975628381449	0.0578827163494059	0.48959245205724	0.488491294487357	0.572339868421075	0.555555555555556	0.667973438302367	0.58487167191457	0.286638936886843	0.515131977372028	0.510385663829946	0.627014956334407	0.131793051106898	0.0243264091308634	0.318977962501139	0.565848468960318	0.00160540397958502	0.502622503211082	0.652447669193352	0.778250760697194	0.81690679878798	0.654807429642311	0.666893945469669	0.853982845238716	0.0530426169295292	0.494053407152329	0.587327636227379	0.229587786894125	0.230677078340109	0.229795167390662	0.230636121410856	0
2010-12-31	0.0749883753605528	0.18245279926534	0.912125255458636	0.469401648185777	0.527124856431601	0.351772227892541	0.525043452079085	0.0104134925102483	0.440461743824405	0.533647540156569	0.627640311542561	0.70553778063811	0.510318363574981	0.567351544046218	0.0605446595822068	0.487466092104631	0.48942051051231	0.567484353835003	0.444444444444444	0.668819985041796	0.586000336919864	0.291099994912071	0.513352308079995	0.510878151191689	0.62502900408819	0.12431414815706	0.0144399237841396	0.387461723523053	0.558258817502824	0.00329863528873446	0.406660402193727	0.530598351814223	0.68991061622967	0.775755715361399	0.533476771398626	0.66295265910236	0.85430885914071	0.0625753892204142	0.487576818087836	0.592269484157964	0.229437570622644	0.230772429906735	0.229370318892385	0.230511626502349	1
2011-01-03	0.0802844167512573	0.187983060830137	0.915826156762123	0.0612361285144256	0.667414934130988	0.418930281610379	0.864390660411959	0.0128783713455126	0.466158812798549	0.570497499971887	0.632064734973626	0.727999866529416	0.512007166303491	0.568731386573499	0.0634543473575045	0.512566579758437	0.512446212094892	0.568631912408672	0.555555555555556	0.667716290382643	0.612833403573288	0.285843502465207	0.514049520896883	0.511421522402128	0.624804849625707	0.12717558331451	0.130070690614103	0.455361907644261	0.581759219237764	0.0414112158879504	0.657396956167409	0.938763871485574	0.77780232531837	0.778773065979161	0.701835703052202	0.666979381720224	0.857984510361877	0.15384915164875	0.54576888544092	0.668273900984017	0.23014388136608	0.231424572786306	0.230777402819751	0.231337828131091	1
2011-01-04	0.0819413932590035	0.200497004770856	0.918395868868745	0.0907737946759827	0.693950568625235	0.454202868889545	0.845303880493972	0.0237853677855191	0.48570232953441	0.577109978553072	0.631022656300696	0.732951545253119	0.513786639720996	0.653167674188435	0.0650640141556138	0.511109227864787	0.515200024332786	0.572246644414034	0.555555555555556	0.667547242860157	0.615898739815392	0.28038208329625	0.514641555403238	0.511983065714266	0.626080657961414	0.123304614053362	0.159952200861994	0.425538526393245	0.5939910722246	0.0391917777409056	0.704786994393926	0.909226205324017	0.825774415171444	0.797405286031963	0.772389228286475	0.671444095615097	0.859503672210525	0.147380579668586	0.551583406796329	0.618545554527042	0.230984526509296	0.232085455136819	0.232130204443785	0.23224152566524	1
2011-01-05	0.0840483913778683	0.217298606416908	0.920520270674355	0.0228346053180294	0.732422670764072	0.571749921951259	0.858129276995845	0.0358201854615061	0.507260398808166	0.588002414121156	0.630323897453771	0.716802528190696	0.517656544689711	0.639370334356383	0.0671080183601776	0.519072255187527	0.526314371352041	0.582980176504547	0.555555555555556	0.667504961136584	0.628685080272476	0.273623540478852	0.518084709767815	0.513170013347853	0.628932449714394	0.119529901971848	0.161682864391872	0.347716030413408	0.604231919464464	0.0408824024272398	0.687800596822146	0.977165394681971	0.88218820863356	0.829372174386233	0.842725079018635	0.677250033483426	0.86193661733117	0.202140405154229	0.563732125701412	0.627521980439838	0.232242589333803	0.232798733392006	0.233685514856979	0.233339684528726	0
2011-01-06	0.0837210886138332	0.235928106555807	0.91802249169702	0.0960391756899832	0.723067705670341	0.491602013584861	0.777962930308069	0.0467420506173399	0.504302246458005	0.582705843698679	0.629855073217831	0.712727143736206	0.518431748094337	0.638448575437693	0.0685560460414179	0.525238644929075	0.520110365971366	0.59913830883713	0.444444444444444	0.667531748724126	0.621388968725157	0.269832331417017	0.519366264052935	0.514394150847792	0.632276477688192	0.118932687596424	0.185500508844248	0.437912433570221	0.599618645190639	0.0418407001656613	0.66086555241347	0.903960824310017	0.89347145928422	0.854592685399234	0.833141082448367	0.68083137442979	0.860959386795051	0.20303168563609	0.547461691815526	0.600191441239171	0.233697100794042	0.233422489615162	0.23465729236744	0.234202437402747	1
2011-01-07	0.0896329724148652	0.244750186439417	0.920615902161446	0.0137889703345775	0.756257993721072	0.579731615961777	0.792716811792493	0.0563537924653377	0.519519166568282	0.591543205234239	0.628662218051228	0.713080170837041	0.520420726070059	0.735310386487613	0.0709679079697133	0.531125127102872	0.521437373298587	0.619218033251464	0.555555555555556	0.66747219429889	0.622623048957551	0.264928564134522	0.520769126456863	0.51567403110989	0.63631790755047	0.119426413840916	0.211427246084042	0.406635389652862	0.611393059748827	0.0412080821663056	0.618969124992986	0.986211029665423	0.93057257713408	0.884260600418237	0.868538209601003	0.685474391074645	0.864057733564697	0.257359883724886	0.550160414477111	0.624437475819679	0.235655705185523	0.23433373845596	0.235881443723638	0.23522474105732	1
2011-01-10	0.0925672559424274	0.271378508986684	0.924345250806029	0.0392554821053874	0.826008001314325	0.609542983404832	0.853971374400565	0.0765572965198221	0.544961153341298	0.621110992699372	0.633221255081523	0.732504875557317	0.524707545720025	0.741522262814883	0.0736891495323581	0.556488751922688	0.539253936376035	0.62983783708693	0.555555555555556	0.667438516778824	0.642419659934068	0.254415374340332	0.524483126080395	0.517493678250113	0.64245206416925	0.124592734162417	0.291989255643972	0.485174416642121	0.629198464803199	0.0556901905131256	0.67617894762323	0.960744517894613	0.946148347898582	0.909435670778514	0.867418866617008	0.695044949483127	0.867747675392003	0.285920436135015	0.578030527316558	0.659599555976354	0.237516085823086	0.235627097176775	0.238223885449983	0.236899202388851	0
2011-01-11	0.0990110264244465	0.300330990512576	0.920652916295934	0.153112069764237	0.798405354521402	0.647832575824259	0.767128517456711	0.0953837021112821	0.539685165939998	0.610578923684215	0.630386942198282	0.725153594370503	0.529556145787172	0.755175898727967	0.0726104134130259	0.553631276811464	0.541742113976561	0.635648029942077	0.444444444444444	0.667478623693798	0.645497361407703	0.248905164218313	0.526701872346168	0.519424773408341	0.648935061327099	0.124711928230576	0.350957590042504	0.570486133507996	0.618211271965659	0.0579200361160047	0.637684497958217	0.846887930235763	0.915586906436356	0.915630579378341	0.799777003088606	0.700755409406965	0.866717109336832	0.368018715618323	0.55122865850062	0.595431762723512	0.239011027762196	0.236804002177319	0.239590192963003	0.238161976406182	1
2011-01-12	0.0996904048353001	0.327215437643762	0.923168666915926	0.0381797972839248	0.826238771226952	0.725218154447606	0.765915231580847	0.110051468508342	0.552001918593213	0.619171490686948	0.629174088835886	0.711863442623248	0.535581662859431	0.758428164075554	0.0740312454964595	0.574416404562835	0.547382516909045	0.637520903667358	0.555555555555556	0.667464403319358	0.651514929422932	0.242727316931756	0.530371855195776	0.521755961652269	0.655880275706287	0.123367437802267	0.340837701734894	0.48045437879167	0.62486948669829	0.0588867935517531	0.615989937040108	0.961820202716075	0.936544740267269	0.927021675594049	0.826515782505969	0.707171628056187	0.870041612185175	0.378374960748607	0.556412266138243	0.627393153629447	0.240516098187057	0.238196348180154	0.241171415868746	0.23956320869756	1
2011-01-13	0.10134733838429	0.357022283099254	0.925636112926446	0.0418388061012857	0.838115599040838	0.780291563142595	0.742117021707696	0.123607615672243	0.554810239305442	0.618795045850142	0.629901917126896	0.716743314216223	0.540896580166569	0.817222484423267	0.0752172890457012	0.585701146615288	0.548941970736457	0.639530211903343	0.666666666666667	0.667412929130473	0.653055117474479	0.238049758983704	0.533230347023275	0.52423335836866	0.66278181064433	0.120020440377597	0.330746395473131	0.513855102813177	0.635746396475616	0.0537778158957568	0.605071367780972	0.958161193898714	0.949200770869255	0.939000612135781	0.836255699281737	0.712454085112435	0.871066820368669	0.351905891105448	0.549774117309853	0.613803697269936	0.242242156831671	0.239799041091631	0.242529387688913	0.240876484352419	1
2011-01-14	0.101592776078457	0.388067522817368	0.9282038230107	0	0.862917493987247	0.846931064388562	0.744869250867441	0.135786171214315	0.569978483952825	0.62649080451433	0.629556700711584	0.71689974459243	0.548314440954338	0.879310315934031	0.0778638338659535	0.564286791151159	0.558828823024038	0.637331905685333	0.777777777777778	0.667406777880086	0.663924371882736	0.2327047006967	0.537260575017357	0.527078772176845	0.669825771893697	0.119654149930698	0.32797505627419	0.498215299579947	0.641872233734939	0.0542438725292908	0.594452017984449	1	0.972684263148332	0.955122779384419	0.861997828416606	0.718381785956343	0.87448811426916	0.375358598029566	0.552572845201058	0.627279491660334	0.244027427641652	0.241685584085192	0.24410985113063	0.242321670303137	0
2011-01-18	0.142037156345701	0.363372440443829	0.91256511839646	0.286660234281753	0.63030920891466	0.965239437100807	0.626150453966248	0.131047760579328	0.646804984554916	0.576853493834588	0.622690126134448	0.616452825053408	0.553500184469688	0.591068440773603	0.0758777957075721	0.520669498223381	0.538258629064637	0.617565358584106	0.666666666666667	0.667699778699014	0.641604765438179	0.239753934706908	0.538015443161654	0.5295168374857	0.673523242369762	0.161142393892288	0.796553983016159	0.960316910937456	0.609840472610862	0.0909389451806672	0.46114565642837	0.713339765718247	0.885250711516232	0.935578220198576	0.715299052649913	0.713745896726582	0.886195361663667	0.610727487901752	0.473988332021739	0.533304401698005	0.24376744024018	0.242492024066233	0.243275465560398	0.242467481339552	0
2011-01-19	0.16325057682154	0.328458383910208	0.903123580906601	0.381190768853905	0.587029058450363	0.779197556191913	0.585689895579334	0.129038155234355	0.602264641691005	0.562014583193474	0.633501750228143	0.597030214894373	0.559034955159277	0.674039688620116	0.0692569491220585	0.500059501063785	0.535902996748884	0.599852124121958	0.555555555555556	0.667802157626507	0.639179945571674	0.248562375865285	0.537708888450397	0.531401608857976	0.674011521965078	0.181968933167438	0.874226416281753	0.868389144196324	0.603717206221374	0.0935063659681835	0.512724754758058	0.618809231146095	0.79296645465929	0.890575243514495	0.591082289813512	0.707182403727643	0.877822926209828	0.658795156047105	0.46287163816578	0.586400356820745	0.243363020406307	0.243041539401614	0.24228277167333	0.242347157449781	0
2011-01-20	0.174951768772375	0.311579457874096	0.896765088026246	0.596862676695545	0.459852271072078	0.693477737785595	0.487541288975345	0.123482261259414	0.548308060576348	0.525325832675824	0.623769793326602	0.663655277698366	0.557643640646079	0.618868880746099	0.0631721659122582	0.473645328487777	0.49220717408349	0.569915418699082	0.444444444444444	0.668279325857928	0.588937795768856	0.263853966735176	0.535783452344682	0.532496891673447	0.670141702622221	0.19608748220364	0.84758731424719	0.791255323212983	0.586778052678888	0.108962915280553	0.394500920400667	0.403137323304455	0.653883339397109	0.81238581922756	0.416894126707325	0.694685149110198	0.874653614007158	0.603144039002454	0.419772898614896	0.546665867759959	0.241667295335837	0.242945468307759	0.240135612780973	0.241433178282489	0
2011-01-21	0.187254168517234	0.302419304829267	0.890492961459696	0.904600062017789	0.36360406191715	0.571336133201946	0.390981780072982	0.119638363787119	0.460733181290675	0.491725949119722	0.626970400260781	0.647420769275461	0.552324299634111	0.575865731136745	0.0549447929759352	0.436474368849873	0.466726120325677	0.527414958245416	0.444444444444444	0.669925539612782	0.559580491846543	0.283605216486027	0.53193413012536	0.53254838145466	0.661604569234154	0.209651891563544	0.818497502255065	0.744217483039572	0.568105028295353	0.122347974303068	0.316832532166976	0.0953999379822113	0.450492250546881	0.689791630631137	0.172533575867514	0.677861934593153	0.866478766777557	0.668544389619487	0.391118216750073	0.547488006138593	0.238928707309958	0.242435253595139	0.237267033858896	0.239896321603081	1
2011-01-24	0.194937657107331	0.289204723294381	0.895270904238777	0.482985716141997	0.523521846766545	0.652661782999372	0.552601463682454	0.113492318098627	0.468168584846374	0.54754710295093	0.629076118914002	0.719769403195966	0.54919267776848	0.582956746848108	0.0469141782177771	0.456491234583927	0.493335518931501	0.494741781091656	0.444444444444444	0.668711083364514	0.590052827809364	0.285603502962864	0.531762077621708	0.532552710173184	0.654080698589234	0.21941328705406	0.75708539351336	0.50749735402049	0.58239521022811	0.142093067618535	0.366319400270869	0.517014283858003	0.466519818493792	0.613615163852233	0.299624945052	0.675218491350035	0.872845040987097	0.676463146840658	0.503389230224399	0.701278395297182	0.237335546128504	0.24253205785655	0.237941980572539	0.240059457628215	1
2011-01-25	0.20009267922078	0.26587703733697	0.899817590154967	0.327594887559045	0.569526920361925	0.692628466570862	0.608771478647013	0.107375382335914	0.511017096782431	0.564753352706229	0.632982366115142	0.76404268632376	0.548042421257353	0.595294570363288	0.0432740085689866	0.477305762643745	0.507336819357228	0.498308432392031	0.444444444444444	0.668408242144005	0.605746145311727	0.282787776982791	0.533180451435187	0.532860066806957	0.64868631235268	0.227662014184483	0.699345038522397	0.575004804204872	0.590739103722914	0.144789022584757	0.449871088574678	0.672405112440955	0.533086762757283	0.585893972983784	0.464832193124308	0.676640294400232	0.87883262665427	0.552590997144411	0.55134277371161	0.638176150964233	0.237443889345025	0.242455644178412	0.23934442079559	0.24071588539828	1
2011-01-26	0.198578955845616	0.242203501516151	0.904031777402675	0.231218242691345	0.596460488072492	0.703317258337728	0.63567309257576	0.106282601246733	0.528699240961305	0.573115267458205	0.631397471599882	0.731288208464821	0.545928057361284	0.607747722884602	0.0382108868208965	0.475878735499759	0.507535585468404	0.509292316740346	0.555555555555556	0.668436545700412	0.605764404652228	0.278354691918901	0.534781780942176	0.533449044942145	0.645475364157915	0.236852086770349	0.642259867721815	0.599500300757693	0.589447835222793	0.144437503840001	0.525736259621169	0.768781757308655	0.612123849180128	0.594796767936526	0.608454211276005	0.679647184203643	0.879654364015923	0.442882255054885	0.569154417385409	0.624481671430236	0.23816753017572	0.242616500003605	0.240870126342064	0.24157730896391	0
2011-01-27	0.197576570546355	0.220220932539674	0.901662058018934	0.256392471108356	0.585130084429007	0.694627701185415	0.612328944128046	0.102780764961896	0.51626437876382	0.564537818908266	0.628939323437378	0.715707340284079	0.539624627264305	0.573619495494922	0.0332659061536653	0.467656529776342	0.484410682186175	0.540215130285588	0.444444444444444	0.668498196190609	0.579890795715418	0.276621561419098	0.535356239188869	0.534043307992847	0.643333415791149	0.240236716242632	0.545692612582376	0.441512166990286	0.588093590187566	0.144672591557918	0.514522632206069	0.743607528891643	0.655762043735031	0.615851074252821	0.667476313473666	0.680652004999156	0.877786980675415	0.403322522405202	0.556270475573851	0.596974077019691	0.239688493751219	0.242528437486523	0.241732956698434	0.24219738862631	0
2011-01-28	0.210709721039585	0.213250413509955	0.896739666998032	0.53609608543221	0.470272994550424	0.65988903368693	0.475715502777148	0.0910485826086094	0.48121461937746	0.521951182048487	0.624363042791289	0.679448948177705	0.531839230192356	0.5203739185794	0.0248595592316685	0.425153316368621	0.46350808869518	0.579061503488332	0.333333333333333	0.919363358685951	0.556481235488461	0.28485661655565	0.533113509727998	0.534038202468273	0.639408899816555	0.252303929923174	0.535580326311894	0.590044557684407	0.552233674684067	0.158286596577903	0.40141163951201	0.46390391456779	0.58426671111197	0.605116643779035	0.540927036743375	0.673405656268917	0.874329605910192	0.519433959236368	0.484778991944682	0.538770362106441	0.241043340009344	0.241831168428026	0.240593719837729	0.241763411005649	1
2011-01-31	0.20924840734707	0.206777788696645	0.899876114390251	0.409423186978493	0.511707653801911	0.683478574174309	0.527109630062063	0.0721338029190761	0.485699427038484	0.535038460639853	0.626889315710191	0.688741692329517	0.523628234650622	0.473330747833468	0.0217002944308101	0.472510042959138	0.46496792629508	0.596655136502127	0.333333333333333	0.662534175018805	0.558285044560314	0.287603804459724	0.532685771176773	0.533942472932093	0.635505335901411	0.257406104708973	0.476102735298772	0.415699235425482	0.540332882998865	0.150142329367212	0.396195002479444	0.590576813021507	0.582157466909256	0.597229577377921	0.546704109389856	0.67047212777325	0.877460263979891	0.483551374892757	0.495243863223579	0.631759162536323	0.241313438978162	0.241164475866715	0.240610676375523	0.241834643824393	1
2011-02-01	0.209757024701743	0.18578234149531	0.903423162602651	0.184798699250127	0.577640081859064	0.681891174897652	0.645995326082718	0.0652318091790183	0.508234470365842	0.562048756628564	0.632476263252157	0.732943447497843	0.516189708006057	0.472396018192363	0.0224127618364572	0.5057158161539	0.479732217071972	0.600499393494356	0.444444444444444	0.671432588918177	0.574722089378217	0.283171184519782	0.533881854244911	0.534122156061977	0.633530887789094	0.256892240653879	0.438908796272448	0.444186846078581	0.565021317147872	0.158445916396707	0.515521765982635	0.815201300749873	0.661531122600558	0.61947173146724	0.674227395365432	0.67350934299727	0.880931553384466	0.176995988258432	0.536208572216313	0.653588553215906	0.241837742637266	0.241483267350508	0.241998827609506	0.242648877261666	0
2011-02-02	0.208116200686356	0.166286569094071	0.901270197059295	0.212726853278277	0.565985322084478	0.665610297152137	0.617777232136429	0.0611031338389233	0.510404691094281	0.554549693672764	0.629287253432454	0.723641094629759	0.506857281247925	0.469752724054677	0.0240709965912331	0.53075692405394	0.468087041213837	0.594303324843197	0.444444444444444	0	0.561953168895472	0.281436323914159	0.534470540498339	0.534392031529794	0.632418052978465	0.255500321405233	0.364744150273834	0.419430014777888	0.551907351960801	0.156869229089474	0.525522988350915	0.787273146721723	0.704403325523189	0.64915355453799	0.720910616735258	0.674542871230335	0.880661564116361	0.0864757904981944	0.525162483448198	0.596373105042817	0.241905637328616	0.241882123004853	0.242753074768031	0.243221078748118	0
2011-02-03	0.214048618772886	0.161005263952734	0.897996145548237	0.247347369087162	0.550941152641718	0.669729473642257	0.588940698210211	0.0564724919257397	0.527495170229516	0.547139564642299	0.626306612188046	0.705133172938642	0.502973264169093	0.430288647112862	0.0268696899931239	0.554998375759471	0.491145516405731	0.580268748615553	0.444444444444444	0.660386430650886	0.587380115868258	0.281919216840839	0.53477338544686	0.534672817943699	0.631418032345191	0.259340112048422	0.340110779384644	0.513368581436577	0.543913846053725	0.156616490197112	0.484590565841205	0.752652630912838	0.720534508724331	0.674530327935776	0.720625740018191	0.673830418528828	0.883797330308577	0.0822952189907526	0.51770358399593	0.59484876284474	0.241938848159682	0.242665273264865	0.243043698048	0.243572731595144	1
2011-02-04	0.212309848793197	0.149450657410991	0.90067194156106	0.12697056202507	0.588194323934177	0.708363198380774	0.65461182328398	0.0555763033634452	0.548811798524284	0.560292527570068	0.630847775659242	0.712906271735624	0.501470671606775	0.431056790817081	0.0302149758864263	0.518521319574215	0.507303216692187	0.581521339043848	0.555555555555556	0.659437324918169	0.605282007895848	0.279214768238036	0.536664489615133	0.535302625568459	0.631357722954853	0.259934682850254	0.300066764653004	0.461616929878764	0.544955804493738	0.157047017514862	0.564234404086958	0.87302943797493	0.774578731254847	0.710172611652451	0.781703096357127	0.675806194390483	0.886915571980995	0.0565970673484846	0.540737008916473	0.629730785335621	0.243441031176578	0.244104933582357	0.243975302476885	0.244265564090269	1
2011-02-07	0.180650849214422	0.1371513607541	0.904704433639162	0.0547230991665872	0.646733195855058	0.701225597289592	0.754677596498986	0.0619337763799161	0.567569437367421	0.585168457656648	0.632148253963282	0.732567050854707	0.505828574462366	0.577777081072359	0.0330905680629462	0.524329195578612	0.545590901569348	0.595726028123625	0.555555555555556	0.668319611244479	0.64784246241823	0.271428029040741	0.540636717550571	0.536657541301692	0.633424549939865	0.264741166154509	0.315328750499425	0.162475589974184	0.593829974376169	0.14638158594629	0.634353893816539	0.945276900833413	0.836589961393762	0.755418858681628	0.846319818281795	0.682209508768846	0.889664301102294	0.0434389190611311	0.565504856619262	0.649680830055594	0.245255194112509	0.245155195538635	0.24589364138268	0.245544687337324	1
2011-02-08	0.163569588545615	0.130509464348959	0.907872424523349	0.0118678637949031	0.678926062635425	0.700142411733572	0.775808506469979	0.0764104097223099	0.588011206729428	0.599611374461564	0.63044658688323	0.734430996711213	0.515295736011103	0.530644385352142	0.0368379111950013	0.527791465669891	0.576380580519849	0.604250628430516	0.555555555555556	0.667956739341427	0.682477267333379	0.262605828472657	0.543035474630962	0.538255419548564	0.637515518972416	0.262866250460071	0.298049897441999	0.21888185527448	0.61280114318071	0.145543579461185	0.646235046332384	0.988132136205097	0.893342449954997	0.805245777704547	0.894881876365104	0.689852182769495	0.893083842295423	0.034928504265808	0.571120980178588	0.631319421063318	0.246724152763616	0.246159602695205	0.247973094359836	0.247030787058575	1
2011-02-09	0.155284691687297	0.131883046818261	0.91188599050627	0.0278742803729981	0.705921347137274	0.73885414157899	0.776468139938803	0.0939559969211001	0.605674296373062	0.610986906962717	0.630264157367006	0.726579266040017	0.520598714910536	0.629705240563461	0.0407941068319157	0.543591993053489	0.550600755803474	0.62161796317189	0.555555555555556	0.667615628734298	0.652196649162019	0.253660775905629	0.545675773959254	0.540099419436848	0.64330050945058	0.263939152577826	0.314532828906859	0.35423258927634	0.64690520979473	0.129000267385807	0.657329129476483	0.972125719627002	0.92542118913085	0.849577886003099	0.902019578149848	0.697976916129019	0.896256281571283	0.0498641863922364	0.577630668295111	0.627986021561588	0.248723192145543	0.247201133137398	0.250073129910582	0.248638559271024	0
2011-02-10	0.162955879753515	0.114448816028466	0.904165982739355	0.173278008704344	0.635288850581703	0.702625405473527	0.687514735165236	0.102724988921367	0.605233639859684	0.588581581041451	0.626847423474199	0.695808253335319	0.522298846918363	0.607436030119609	0.0427750327461191	0.560523744406565	0.525484797462592	0.635544145675592	0.555555555555556	0.667550888556282	0.624714162164902	0.25256613710064	0.545937948041464	0.541630791451308	0.648320345033312	0.28132119321404	0.446466097988358	0.497273109508745	0.656948964393488	0.117910980842191	0.584539816687906	0.826721991295656	0.894516693290705	0.868425296872922	0.817810717745732	0.699748024957143	0.897182052033758	0.165467420580432	0.529680840258089	0.571656481624016	0.250326481812749	0.248025767609125	0.250600278047672	0.249474760571911	1
2011-02-11	0.149720501739944	0.0982598874379416	0.907222000046885	0.137998808645019	0.658914944569267	0.712065866854946	0.702140384782483	0.112673879663597	0.60650033903647	0.597931230277677	0.62982540337441	0.691951637676164	0.524030479383931	0.59660883976052	0.0448119290035563	0.555727172465243	0.525020396714048	0.635032931801192	0.666666666666667	0.66764744364673	0.623886687048973	0.250238740071714	0.547066442409078	0.543097674605746	0.653038008263833	0.283287001188764	0.400918264145278	0.357062877278466	0.623084818767796	0.0858685046194537	0.578816882484587	0.862001191354981	0.886600858564322	0.878247677301849	0.78996667652642	0.702523641381431	0.899437891821126	0.106407873523062	0.53018173782704	0.622478818809778	0.251821432775008	0.249536026847182	0.251508704305707	0.250464740599028	1
2011-02-14	0.141333334402529	0.0871717651596527	0.909802816393854	0.0529540188279685	0.682072515030689	0.705593932286455	0.711846753012418	0.124541335692213	0.611201050533167	0.607490589613766	0.629999627586362	0.719119086002322	0.527011165848105	0.582579655517354	0.0472947924930988	0.539775921146314	0.534874242220394	0.627861537471588	0.666666666666667	0.667676465177261	0.634441654191209	0.247041625609761	0.548087525384657	0.544489953246063	0.657737334153906	0.28333077565737	0.347944928219674	0.331489232878253	0.616426646609261	0.083313996959012	0.580947025394488	0.947045981172032	0.911907579108416	0.893563825364947	0.820292466335643	0.706055495905624	0.902131776335267	0.0881402017355378	0.531937486762197	0.622521725755851	0.252875851001746	0.250981508174064	0.252676162598009	0.251583200600654	1
2011-02-15	0.137896619581197	0.0780488548247954	0.912165458861315	0.0266743810226839	0.689265118602367	0.654472464124999	0.695880439309626	0.131980851256402	0.618661184124046	0.605972496152672	0.62913266536099	0.714832618244186	0.536061426703924	0.567945656016591	0.0506982859146913	0.546122081610507	0.560853195759826	0.620564985469544	0.666666666666667	0.667713892075673	0.663362240169161	0.24515231415763	0.547102408557119	0.545392709968028	0.662053169581617	0.238989182763438	0.296675628125767	0.328836830535309	0.60977447113543	0.0827759311214176	0.564837438265766	0.973325618977316	0.93822945162836	0.912894199874062	0.84756360101706	0.708520654082174	0.905097749872402	0.0764852322990834	0.526405959538953	0.608770861572901	0.253554718962684	0.252063800459008	0.253628082199652	0.25259362632198	1
2011-02-16	0.143635809182016	0.081897498004804	0.916165825464202	0.0619518439798841	0.720892507297544	0.770795204708943	0.707515413810781	0.145822243419587	0.613599954801014	0.616490335857879	0.630808187766468	0.720359008896946	0.546128404647037	0.629343106162801	0.0528706098675795	0.564218461328632	0.560886409804993	0.608888098306903	0.777777777777778	0.667623645115756	0.662605481826676	0.241355658373061	0.547581293195545	0.546217518766225	0.666575476865223	0.220815858349241	0.313262446044504	0.564939815896475	0.623712940460337	0.0826293454264771	0.585863158648261	0.938048156020116	0.943090828840726	0.927465413559521	0.838779855220575	0.712609166213248	0.906139545871428	0.114629505249178	0.54304977696062	0.629927475516228	0.254272599640068	0.253432859582548	0.255041556941262	0.25384796903257	0
2011-02-17	0.133898161743268	0.0742184182077695	0.911754532130515	0.216812360387563	0.619178897203458	0.810823730567047	0.631852407675075	0.142992779819861	0.594671499038594	0.583594883506213	0.627218739612105	0.701952737885499	0.55006669646392	0.63233720821248	0.0533755216502342	0.529358362358157	0.525916372785841	0.599281842295444	0.777777777777778	0.667543832640603	0.624680269729533	0.245531647076824	0.545408410711592	0.546411814902582	0.669055477912835	0.214312278550728	0.340818330177287	0.429303999951914	0.633251395555	0.0664905166263735	0.522457160422281	0.783187639612437	0.890640559731655	0.919007370398976	0.746673516546669	0.709945723418439	0.905841762288574	0.103031558870006	0.500507430993713	0.561792910098739	0.254815691753031	0.254514423815058	0.254819204592642	0.254234792856654	0
2011-02-18	0.142571706469577	0.0696234655201588	0.904969794720308	0.536311776233537	0.486875867593702	0.819871739660872	0.518832020979124	0.125656075928749	0.52419576274832	0.53595947088938	0.626570154295388	0.649604831719059	0.552470362432366	0.587771169949646	0.0504543317738768	0.472739488708595	0.502591952060682	0.577806460691023	0.666666666666667	0.668084088546867	0.599741234413167	0.258902674932619	0.540310166811045	0.545474927645462	0.667352944940671	0.216024381212731	0.437435097659342	0.618053349595602	0.59314076120497	0.0951988817915357	0.446562522694879	0.463688223766463	0.740774821371189	0.861445432972394	0.525452034680297	0.699194207739431	0.898685745034952	0.200036970096235	0.438360417088847	0.536009704049204	0.253907173348445	0.254809927851209	0.252804634879556	0.253526581723106	0
2011-02-22	0.154566936787507	0.0871032849525937	0.897715326992059	0.963881512953822	0.339420656292913	0.659820937803584	0.33272057637816	0.115390115810633	0.437275260720146	0.472175005366233	0.622649861735386	0.597297584756165	0.551364601117886	0.491206121771226	0.0457212732598073	0.408409315571507	0.465863746918924	0.541398169426726	0.555555555555556	0.665065854175232	0.559236780949915	0.284013378841694	0.530535816883955	0.542631214650871	0.659146378371894	0.224295889727348	0.517529563864778	0.606040741584473	0.527646496730941	0.13122881696921	0.258077473855978	0.036118487046178	0.487101014744698	0.735181697467254	0.187214944378844	0.678027883486752	0.891259941349785	0.222433871389624	0.358891080210213	0.496810224648962	0.250936040703592	0.253844093264965	0.248580086225548	0.251365059485262	1
2011-02-23	0.163424631382368	0.103334545854138	0.903301155634821	0.817995665440653	0.3930686248809	0.619622256403612	0.389333877595271	0.112099718456166	0.419890115261273	0.493157565824293	0.628642672605523	0.657227747609504	0.550535134420207	0.518953022831137	0.0406875244956793	0.413378113191718	0.469015739078959	0.512053868789664	0.555555555555556	0.658695966516169	0.562896655078415	0.298678168181487	0.525581699739774	0.539294799964897	0.648556111002751	0.227766590845718	0.528254579166831	0.656994021488109	0.545526545700171	0.136564232366085	0.28315422100629	0.182004334559347	0.37044884609106	0.610589973221864	0.11525550485409	0.664763877780581	0.893716133835611	0.253516041617231	0.418185031659139	0.638589285546327	0.248440117887183	0.252928477246257	0.246730653216197	0.250127431693658	1
2011-02-24	0.165654419946243	0.116831680388577	0.907457354071833	0.808538212614994	0.396537906199337	0.630490175772495	0.395447657827855	0.113372552551527	0.428221268907132	0.494790875160472	0.628919039480042	0.727444735468122	0.54345760599703	0.577174227182822	0.0390823340392831	0.429103834807446	0.452028438995061	0.477643118702793	0.555555555555556	0.639160816231951	0.544426081206657	0.309689355027892	0.521719922985825	0.535798263298835	0.637057677593263	0.227572910203981	0.496060645541924	0.503885827561475	0.549790268749683	0.136395144870565	0.285139411344992	0.191461787385006	0.296081838006791	0.501763253830216	0.10631287808576	0.654127668872771	0.895545740959397	0.279221456284761	0.445356025143409	0.604973942116292	0.245515193920812	0.251816345610112	0.245560381962297	0.249149243572943	1
2011-02-25	0.169363464643168	0.120438639536946	0.910616848000619	0.616450871443015	0.46486615031266	0.686461557238621	0.474215991599546	0.111646901960836	0.458223855707535	0.521527035668126	0.631298716157864	0.722870973784169	0.535453960809993	0.58049546131468	0.037592251665018	0.44188721407457	0.458531137610323	0.458391414057431	0.666666666666667	0.675137542830931	0.551853479102607	0.311664139125045	0.522086135938928	0.533079496916455	0.627212796747717	0.230210730136366	0.441057230585224	0.488376610693692	0.558137236715546	0.141518987815616	0.353546073192157	0.383549128556985	0.315582590287996	0.435968436872183	0.227164770744157	0.65071474031223	0.899129303560885	0.150109815671393	0.515402032511451	0.649296980814321	0.244050564125865	0.25135198171877	0.246053357817876	0.24904792921448	1
2011-02-28	0.169719993681053	0.106167687941757	0.913968023931524	0.432725553758563	0.522858338241369	0.731179252125003	0.544203552799463	0.10367009974687	0.471756159684405	0.543757229860478	0.632308009971476	0.735545656698746	0.525274136852623	0.576016883162873	0.0352893812065128	0.453465318885232	0.465465929708666	0.470601286038564	0.666666666666667	0.676966910807709	0.559547791598132	0.307168019263901	0.526207410340015	0.531787487392114	0.620413663011139	0.224962925546482	0.401272783212155	0.413143821903475	0.556823350469116	0.140543404718517	0.442012171419466	0.567274446241437	0.394654685183277	0.419500943644362	0.402727516058699	0.652770287611745	0.899413363749121	0.150032801574908	0.569019730420549	0.646609631683056	0.244433337423151	0.251087058158235	0.24759974150999	0.249633626945076	0
2011-03-01	0.179273233498711	0.100215859989533	0.910175681420322	0.574611493315068	0.470845393245176	0.663429274597321	0.466700890716046	0.092492872992156	0.454567821612832	0.520475631740088	0.627794223908188	0.710367784047644	0.514225693696949	0.519207542435064	0.0305664145052504	0.434290042990552	0.464536532327772	0.513053117134787	0.555555555555556	0.664667346279717	0.558356622008238	0.308794094748325	0.524984563750052	0.530491878795867	0.614518600664888	0.227153592780903	0.382320626526046	0.491315629504724	0.530483514773037	0.141137629571502	0.41467773311638	0.425388506684932	0.396344165996551	0.409107960896627	0.419093111573813	0.65011650625288	0.896409198141776	0.221120008848674	0.53549872499954	0.568773328900021	0.245978847350034	0.25036868524105	0.24769024263871	0.249596499764898	1
2011-03-02	0.182996354348108	0.0946891626053238	0.915185649280181	0.472384300247636	0.503602388280931	0.640948011503475	0.510576630448142	0.0886427179522582	0.458718451305447	0.533454765842386	0.628466443762508	0.708090938649725	0.506109717096811	0.526299553904057	0.0266425227793165	0.432949441648502	0.46619549875073	0.548997441403591	0.555555555555556	0.664734278224148	0.560270574949722	0.306809998878885	0.52346402738818	0.529129609424727	0.610305512610197	0.232039694301593	0.404021535968864	0.500282409282895	0.530111870782104	0.14096214884002	0.427684848138752	0.527615699752364	0.434233593644997	0.415306668543227	0.48551813585695	0.650524825832846	0.898080847882133	0.267844196644618	0.540334663328211	0.627111424178192	0.247351020311736	0.249802426404729	0.248428139515044	0.249938136008081	1
2011-03-03	0.172562502985634	0.0811850150555969	0.91934922726476	0.201712971945816	0.581011238508953	0.689529525783343	0.635598804659136	0.0880002599039138	0.493218829391176	0.568643932889919	0.631476778497101	0.744704886778088	0.500463126628055	0.628664484155897	0.0240283671410677	0.483623720772623	0.48314958478946	0.597849525141498	0.555555555555556	0.670016725726609	0.578428515229952	0.296662203953905	0.523775127606246	0.528106448700112	0.609599274047009	0.238755070996168	0.395146577665976	0.320533742189769	0.570291693362652	0.151892080572737	0.52422956651621	0.798287028054184	0.556832469219867	0.461915367051335	0.667093554156623	0.65793170399367	0.902969131891723	0.244736651730098	0.581400957758825	0.666471903316821	0.249760284796598	0.249542585002557	0.250714082858168	0.251202651434894	1
2011-03-04	0.16904399469236	0.069870084514181	0.923117708462849	0.185706806178608	0.585281460887555	0.695728011402607	0.63271043979557	0.0833043214010018	0.529798693934277	0.566512679963335	0.629207322198753	0.734769096689933	0.495273563025707	0.633318907695738	0.0254910558165186	0.518685294375647	0.482220472396473	0.626416102858988	0.666666666666667	0.671574522537422	0.577445411140479	0.289118969324591	0.524433364620978	0.527428950681592	0.611087243691655	0.240406449217707	0.375888624121732	0.497671425641042	0.563484910453563	0.150929054334706	0.531982293413616	0.814293193821392	0.644321215937737	0.523299626577026	0.761338105513429	0.663718460464938	0.906843722967245	0.216408786021322	0.5593257435513	0.606391318594655	0.25147045818583	0.249666314700393	0.25234413410313	0.252295502698238	0
2011-03-07	0.184570520693348	0.0679793107489408	0.918577214848404	0.354510876312221	0.517355084959148	0.646443665409269	0.534447546564508	0.0795554280356961	0.52840872863752	0.539773054629901	0.626500009756689	0.693133252828255	0.485833010256507	0.571113571780148	0.0262304076387937	0.552439697029919	0.456109077204234	0.625679465799671	0.666666666666667	0.66306389809335	0.549822559614638	0.289617714741442	0.525889738091838	0.527198987541719	0.612243065676527	0.246634475345277	0.384082189119052	0.573789310771206	0.538506841404204	0.154781184946661	0.491086456558566	0.645489123687779	0.64194145668101	0.563397962827896	0.706302283727726	0.663145636189996	0.905523964028841	0.208498282787431	0.507413110655009	0.563068062467996	0.251780992145094	0.250015673019473	0.252311999979518	0.252575362062417	1
2011-03-08	0.190155144689101	0.0662235922526482	0.921539649249871	0.339958938444883	0.521939425548111	0.63547763172453	0.538281588484495	0.079188518811395	0.530645831104692	0.540848826771475	0.627352331271932	0.69275481310771	0.477637191209982	0.527511140694995	0.0270238813716316	0.535792961130837	0.473461472705063	0.619891633922021	0.777777777777778	0.66339979833857	0.568124863653492	0.290052664366062	0.526265076818916	0.527095435222849	0.61313342020194	0.243060519352469	0.341667048829744	0.501242272618771	0.537376203281826	0.154661182656246	0.480361612258194	0.660041061555117	0.645588141741742	0.591393635952371	0.678274509573221	0.662614849633346	0.906957217624621	0.172272237856325	0.507187446810688	0.606092511257702	0.252712627859698	0.251263909539791	0.252387027610552	0.25285729358516	0
2011-03-09	0.190469559826254	0.0679941267417028	0.917770842141165	0.400655784814858	0.474077158741251	0.594904617356628	0.474428170472853	0.07922672978319	0.520803484798596	0.524295080226203	0.627838376373852	0.69968964868371	0.474702045252546	0.464472248844255	0.0277173217551036	0.520244221136785	0.48822584120593	0.607940406970897	0.666666666666667	0.665669461044653	0.583946437122587	0.294805675439511	0.523519045162705	0.526424242398723	0.612662066134003	0.245067224965714	0.333336045592064	0.440013438900852	0.513936218950927	0.153299241308523	0.456139611413101	0.599344215185142	0.626191367888258	0.603337113624457	0.625278575893804	0.658471567366153	0.90645022388555	0.152008612498195	0.473469011853172	0.574304849452769	0.252763191335896	0.251980828057148	0.251643740525093	0.25265240374832	0
2011-03-10	0.192227861720461	0.0818187921161703	0.913551137692278	0.634701200717671	0.398176130536007	0.547505393257014	0.370774349637023	0.0808832972689583	0.499823401184004	0.496803260994276	0.626101528826502	0.679162098721173	0.479855746580109	0.466933202198532	0.027592950580757	0.471947954602236	0.508630327651374	0.569430763044816	0.555555555555556	0.665768069942007	0.606756619713195	0.305698649873268	0.519235213673723	0.524969455891565	0.609477183516275	0.245755720382246	0.341534214109867	0.443274451914537	0.50987878084093	0.155751522652718	0.375181669647914	0.365298799282329	0.52909239752831	0.577658031511128	0.467355247791465	0.64905459219182	0.904914708145009	0.136079950358927	0.43007168773958	0.55202086856472	0.250901352331732	0.252256676382622	0.249749649514502	0.251716889616583	1
2011-03-11	0.186786419259362	0.0876971524339878	0.917467721986976	0.420028409359461	0.467136740877882	0.591458889255109	0.479766041336706	0.0816473423792695	0.519619139250993	0.525451504907634	0.6295523281708	0.705750297890709	0.483969909488396	0.555626782808126	0.0279979916881653	0.473183778896434	0.512976548681932	0.543269299381828	0.555555555555556	0.676790942077003	0.611114728028898	0.307678734391039	0.51741131976128	0.523414848324501	0.60641120214078	0.233052416244036	0.338591885009122	0.335095636744188	0.557405443665128	0.150737652532874	0.420704460618938	0.579971590640539	0.541560724107241	0.564858482947952	0.507856204996328	0.646646027692832	0.909662754635922	0.185385549028538	0.488303332017432	0.649137818659062	0.24974438262281	0.252535436349485	0.249769725033379	0.251655786528227	1
2011-03-14	0.173628009017444	0.0802035651210288	0.92109229036783	0.360037189146825	0.486355689281578	0.560634175974111	0.512620661440289	0.0809366456325645	0.517131925772429	0.534579805676391	0.632438122962044	0.729882666811962	0.488210607056019	0.654466365609425	0.0291000521442273	0.496578675166426	0.517323417412279	0.538032720006689	0.555555555555556	0.667892490768383	0.615770321918039	0.307488259140921	0.515215782840967	0.521700757542745	0.604009445481103	0.234951357357301	0.327146334054901	0.304160453756076	0.606991750066638	0.105825894681081	0.487160438141925	0.639962810853175	0.571447080643562	0.56668002887371	0.564104907185363	0.646033984288755	0.909036911964436	0.200205381577398	0.511821638252343	0.616242520761322	0.249484399732913	0.252560909091123	0.250161709970427	0.251813662535392	0
2011-03-15	0.187104901158776	0.0960696409352797	0.915097187826689	0.691200307386175	0.384651727069132	0.559903380144387	0.368811299234144	0.08302113817074	0.530929431399107	0.495337423845314	0.622985180599773	0.674221399169078	0.486632591513253	0.552999690795855	0.0299873675994317	0.449903687813238	0.472831208994612	0.515599961568875	0.555555555555556	0.671629063959409	0.567169433841203	0.317349323673243	0.508546906032384	0.518900644822289	0.599554072677654	0.246354956313947	0.393195797680117	0.467930843361403	0.562179712873913	0.12558189092301	0.28221502034556	0.308799692613825	0.472277906687637	0.533535739050383	0.411505146651639	0.637195740939989	0.912050472384993	0.191216895725594	0.453866542445017	0.531661520644677	0.247992331667043	0.252278506588702	0.248462631836637	0.250866483579819	0
2011-03-16	0.20918356826427	0.129077747873361	0.90543617281485	0.885616318875442	0.246525363411798	0.459514891992339	0.148488168036232	0.10143414880578	0.479849138769343	0.421435228393949	0.622142773769837	0.550491042135697	0.477383625093489	0.441200949418002	0.0282613045100136	0.355277352127587	0.404915067256239	0.484315271318553	0.444444444444444	0.66577326240527	0.491430475362415	0.343636141334955	0.495951714360218	0.513961972053592	0.589290239658882	0.27073127065875	0.539621587913266	0.633456628604441	0.503782693751636	0.183631985550535	0.119021235850074	0.114383681124558	0.336248926225791	0.464310256999844	0.23203776953029	0.614642116666453	0.904945177685901	0.313797921646373	0.352346884297034	0.463288141356868	0.244748204750151	0.250669266320443	0.243611707997121	0.248050053971106	1
2011-03-17	0.217606104977682	0.159728132887293	0.910918641233006	0.759019359202684	0.305357417063122	0.442771500550405	0.255617157096365	0.105566045792233	0.450695360051404	0.453190307618274	0.628851892383858	0.609790166973691	0.473727577174481	0.459702686466926	0.0256673944695239	0.372858249579217	0.433216128170358	0.484957631164482	0.444444444444444	0.665848425263606	0.522997291294821	0.35731091710157	0.484899208287128	0.507642979324911	0.577575412259316	0.275681439962978	0.534806305732605	0.570836360764639	0.502021450530382	0.182366271062881	0.21485476823696	0.240980640797316	0.291089940904366	0.402513925087989	0.221220309316525	0.601584762941376	0.904137134010735	0.359079237072854	0.420561932775798	0.64517886520274	0.243010588578421	0.24885549674285	0.241494172297127	0.246358664667999	0
2011-03-18	0.221355602503431	0.188529016021021	0.904656385102318	0.867571301773948	0.273848653732352	0.383700853488197	0.227940899160617	0.114826013950036	0.3904159261242	0.43906524953511	0.628423965840296	0.709078937613233	0.467544089840154	0.390979889049181	0.024217897772082	0.374304318337912	0.410721462690588	0.465747105569214	0.333333333333333	0.666356897593966	0.497846959441798	0.371960057104171	0.474576616115416	0.500376118319628	0.564502161063771	0.281863592313501	0.548003813989991	0.5867049911439	0.468103027946298	0.175299326892579	0.251246294463415	0.132428698226052	0.221946327024647	0.337360524170218	0.167642643187334	0.587482592274811	0.897156647403807	0.419578852134811	0.407899782234272	0.566236592914362	0.239931128507559	0.246720754934244	0.239125200886976	0.244449209579369	1
2011-03-21	0.221634347553294	0.213015448691376	0.908060172318721	0.631598871700685	0.375714380667721	0.480402551158261	0.375144605047457	0.118582397449289	0.396294484751694	0.488080621032716	0.630475649145971	0.712272009703347	0.458210508408589	0.443887287901837	0.0228683355062733	0.409066765319856	0.414669685154946	0.447698767546674	0.444444444444444	0.665322294962618	0.503968262351579	0.371092642898258	0.467219738135961	0.492986381740376	0.554163339427654	0.2705713344564	0.484946302100175	0.429631986677554	0.515877392098757	0.196341020842667	0.330242186963902	0.368401128299315	0.260711368155336	0.307355655847514	0.281264480951852	0.585540627832651	0.900801077903411	0.275905791734913	0.506960611157643	0.68128814049116	0.237871405058937	0.245551852258658	0.239626843482179	0.244029468841309	1
2011-03-22	0.216581552960185	0.226359154455711	0.91076990959449	0.579646158467936	0.396345944433254	0.559684711462815	0.403485838008525	0.11846043933789	0.408185341828822	0.497561119840532	0.630869169818218	0.736279661900455	0.450040789474889	0.422950963595945	0.0217647727888845	0.430471854195447	0.41951390959909	0.455887220564798	0.444444444444444	0.665490589186484	0.509467433463608	0.367170868192563	0.46028101653569	0.485587936790351	0.546815882849875	0.255392090392267	0.413397070691278	0.321146924916465	0.512733046732484	0.195253701999702	0.373213145175755	0.420353841532065	0.305238046955206	0.302779348727143	0.374226016319196	0.586358243138382	0.901465130872028	0.240615288900848	0.543934346158718	0.619701724019603	0.237260431789349	0.244492127325779	0.240419424364899	0.243937591314508	0
2011-03-23	0.212781521617477	0.243900652552085	0.907668800225009	0.634607513298257	0.377043436104148	0.559342444950305	0.37810178038696	0.121426221956421	0.431605081804052	0.487711696234177	0.627055508452302	0.707793157010036	0.445140569062143	0.363108145724038	0.0212423631091335	0.446043557073308	0.428239513889391	0.500139733627795	0.444444444444444	0.666298149436124	0.518374399552321	0.366008656427289	0.452937957692537	0.478095893874136	0.541241162746376	0.24709321311575	0.364904400875849	0.389680764527191	0.477976229266554	0.180207152763738	0.358863810095899	0.365392486701743	0.315157208926285	0.303165120357926	0.393169599147238	0.58534594640308	0.903603728085685	0.233392202220061	0.534979180280309	0.584626826021961	0.238586385921524	0.243525557866938	0.240463126994776	0.24359630471859	1
2011-03-24	0.222191479663383	0.243027690877793	0.911033594563885	0.476563619286309	0.441320503235871	0.573909799894898	0.462474372225432	0.120862172318666	0.464979782756386	0.518070539870421	0.632794285408537	0.71923312452796	0.442388922077328	0.357225888509231	0.0204353101582392	0.448489299895157	0.44608949827594	0.531186725896204	0.555555555555556	0.665930506907214	0.538261292035855	0.357053488222877	0.447035949743114	0.470837724921392	0.539034732939461	0.244449950531851	0.333130640287345	0.428516039652154	0.498321939094498	0.190698543810962	0.420770071832369	0.523436380713691	0.378605982183353	0.325405084458744	0.489504280302644	0.590863416650903	0.9067935770953	0.25286010177497	0.565285761147236	0.654227511279639	0.240078458498969	0.243401828169102	0.241885994928407	0.244082293443485	1
2011-03-25	0.214110164351038	0.226884611722633	0.914765853124702	0.19045936760619	0.506214427334792	0.576789565339013	0.557248689594136	0.12129301481375	0.504519089887993	0.552284640160511	0.633159505711843	0.743836432369601	0.445507522075161	0.423805402861372	0.0205632477982533	0.469800422061833	0.47880300104702	0.588725018536115	0.555555555555556	0.662345178844244	0.573763712630843	0.341595093441297	0.445505137167668	0.464703205535078	0.541216771318822	0.246362964786889	0.319042929314211	0.410798641116954	0.539399001025734	0.198498906016644	0.5179587881347	0.80954063239381	0.523794434151422	0.390534452869722	0.692057766344727	0.60222532968221	0.910740402057276	0.208664456348915	0.599361777116937	0.660236274763867	0.243092923693277	0.243369077176512	0.244418785730853	0.245349725678611	0
2011-03-28	0.211512147647986	0.205693409697276	0.912193859643752	0.205782268787486	0.493642381835833	0.540469782504158	0.542175951853756	0.120550413176819	0.492281096666161	0.547153618870597	0.631052732187253	0.726014495713435	0.450728067295204	0.469551971345022	0.020197758939399	0.500078544469184	0.494397357965201	0.622747996916871	0.444444444444444	0.663669318434993	0.590733631592286	0.331247389981962	0.446373696679904	0.459981683230571	0.545734705291654	0.243760522089346	0.271165603199771	0.42251330476289	0.533926519837872	0.198552729441069	0.549201651483757	0.794217731212514	0.615076289168273	0.465580005157202	0.776569315744349	0.610214243265538	0.907313400830605	0.188109683484452	0.558335099928513	0.593095513598261	0.244701996071668	0.243141993587094	0.245842096982149	0.246241099976701	1
2011-03-29	0.211677381344192	0.196115832588691	0.915127893262783	0.189005570815167	0.498994693605766	0.611589524339384	0.551589993899413	0.119901250958199	0.510410318757772	0.549487581993774	0.625564301454699	0.707618273530173	0.449870971941235	0.47641517286983	0.0226489702726031	0.573430221120166	0.478471611927096	0.641128840935652	0.555555555555556	0.65504756267945	0.573400371196689	0.322812563663739	0.45146027716412	0.457294290608089	0.551681177271923	0.240893799784711	0.244382328821325	0.399155485864562	0.547730383626371	0.196743680585599	0.518173648811582	0.810994429184833	0.681964122208052	0.538784670415372	0.815614051201746	0.617119056776674	0.911222795191822	0.153894861224606	0.545109936527892	0.607183728033132	0.246111725639001	0.243544487798568	0.246916339321015	0.247039239092698	0
2011-03-30	0.20445750365178	0.186764846799087	0.91238919650066	0.264189024216631	0.469886157389716	0.586498625415733	0.518950286513479	0.118960586488038	0.504694257293846	0.537970335930579	0.629389306461543	0.704776516215721	0.443128322127731	0.488344392949191	0.0250704699968921	0.540967029505146	0.465531761915195	0.641031669389749	0.555555555555556	0.675131599191528	0.559389642406727	0.319417620967622	0.453977076845314	0.455683613385955	0.557498669032717	0.233307832104375	0.216631719081556	0.360193227800951	0.560357636762083	0.19086530780768	0.512946411245809	0.735810975783369	0.699518416822005	0.593669730318686	0.781045921656811	0.620218593422618	0.910098389173547	0.0503321182543447	0.512693658022038	0.582330413519297	0.247475245399958	0.244899716767597	0.24707067327371	0.247383792899354	0
2011-03-31	0.197134052397998	0.181279332349338	0.910110988162624	0.268061810372566	0.468339364974332	0.547218584929858	0.526572869266652	0.111041495853614	0.503896180243684	0.54029973618528	0.627834721093118	0.703337404143888	0.443383476132138	0.433285143829054	0.0281070855186527	0.55915538078373	0.492107739211919	0.631838370818817	0.444444444444444	0.662634873301717	0.58828806519978	0.317079438300844	0.456169710368548	0.454864854269058	0.562917468807857	0.22701076205474	0.17807684568964	0.336728873268204	0.540175067211748	0.184725684990667	0.502244333351536	0.731938189627434	0.709828542330031	0.633831868503757	0.750785057436244	0.622540668836103	0.911039922138409	0.0326588773202329	0.497588223020694	0.60160837548534	0.247986562490582	0.245909227111369	0.247144622189316	0.247649810960891	0
2011-04-01	0.203516463456475	0.181618654684102	0.906630216202353	0.35271874182138	0.417616020335837	0.471308461735758	0.472347677421763	0.0999512076345761	0.476367389991156	0.523263080968044	0.628741174195342	0.697443344825053	0.453104123258471	0.369782725570062	0.0290628266680586	0.501574350140821	0.530163366208761	0.594954781574095	0.444444444444444	0.665324092451001	0.631496861990449	0.320245121829097	0.455022175389896	0.453963981886855	0.56657781827743	0.226049823053846	0.192877367988295	0.444114455551061	0.519858498310341	0.186656071459931	0.494641940549152	0.64728125817862	0.686257497888734	0.652440083974546	0.681240396924397	0.620363360305281	0.907811866762548	0.0600443025378236	0.46263510875897	0.567872376233628	0.246978387907032	0.246920199243478	0.246241483377375	0.24734452993786	0
2011-04-04	0.190387322447165	0.191584105508796	0.90280504983604	0.469164478956159	0.377103511493991	0.48017175512966	0.423487144380688	0.0931751403291489	0.459244797659769	0.508931830435005	0.624309424430468	0.687349099528025	0.45999656482111	0.384604798362268	0.0295813316634872	0.47831297107768	0.503620577049214	0.56778356750234	0.333333333333333	0.663586008389888	0.60153655358353	0.326746948112826	0.451069608015748	0.452396426720916	0.567933488058657	0.22366065454349	0.219144174898051	0.356539519272503	0.536855841383314	0.175879761335096	0.416005967127199	0.530835521043841	0.628667065536053	0.644892488372552	0.577922473998828	0.615262900250205	0.90730217631685	0.0884512429932452	0.447544665164407	0.572661781549856	0.24564230077753	0.247057756822437	0.244826755336135	0.246648580420107	0
2011-04-05	0.167224419292125	0.205064095557245	0.898791600249769	0.639076457833681	0.350420832835482	0.460308329656611	0.391717885183552	0.087728067189742	0.448678472024935	0.501026439578339	0.627172342190214	0.690963369687414	0.470461474427713	0.426551359923748	0.0296038964530656	0.477032620984618	0.509161363754186	0.538344518109836	0.222222222222222	0.668357387086328	0.608055989400761	0.334330247091293	0.447970894533246	0.450478467780025	0.567130256871378	0.227171009265748	0.248203869204101	0.264627847745462	0.585605737548623	0.111638620155198	0.368537702941173	0.360923542166319	0.529169425646455	0.605388302228075	0.432669165439488	0.608997358366313	0.906900032826873	0.124581641067811	0.443820354932228	0.582016486302195	0.243898906406189	0.246889622746292	0.243329009857186	0.245774669954587	0
2011-04-06	0.162395812128414	0.211304855167608	0.895444870670868	0.673285157142528	0.340443841567838	0.430603456261716	0.383534302012353	0.0833531558006333	0.421912522974662	0.500271761198077	0.630324582488451	0.699000748090975	0.473242997951791	0.402045013478455	0.0287006676759423	0.448272169563021	0.477708440219991	0.510981004268939	0.222222222222222	0.670098136037266	0.572404283435249	0.340806646318785	0.443852956323004	0.448061811841265	0.564851486949118	0.225761284771434	0.248360288335358	0.34706557053091	0.564333025885461	0.105903239145712	0.372691354865726	0.326714842857472	0.450535478416257	0.551808262911157	0.345963837255436	0.603351294923971	0.903628129391223	0.157900281930559	0.455380342928572	0.594995379123188	0.242369289629944	0.246805926270427	0.242125567110969	0.244947127685254	1
2011-04-07	0.154622367902684	0.219513749856025	0.898549728012458	0.835457680310831	0.341117585991783	0.443832233925818	0.394014581423205	0.0845018109769581	0.411633472032983	0.502774798778996	0.627210423218935	0.706484704243637	0.475614090175738	0.429243759034041	0.0273236798457421	0.421015585204218	0.471537104816661	0.491574362193112	0.222222222222222	0.668357996329417	0.565512288617022	0.345235492811962	0.43750902490178	0.444769268164031	0.561892443211706	0.222037733614153	0.240794993481154	0.302513212439194	0.579745299596256	0.0988888999197544	0.329801086831062	0.164542319689169	0.339792104081746	0.477719526901042	0.222131850976768	0.599160167015324	0.903346056380327	0.133321824087279	0.471683670947125	0.603020074485809	0.240862782268463	0.246304448755361	0.241332910582929	0.244275339699701	0
2011-04-08	0.150579633906625	0.230969658321484	0.895410882849263	0.940885077949177	0.303373100462014	0.361899279410148	0.347143725172973	0.0843316567669317	0.392429218625148	0.490918834493656	0.627977228771357	0.701176923195023	0.480679357252279	0.356360905941855	0.0262088439933716	0.41263001601584	0.46818634654545	0.487728209893445	0.111111111111111	0.665122500956466	0.561648519240039	0.351914954856487	0.430464203705066	0.440625845168265	0.557826798775594	0.219440111550808	0.237184166925	0.435428363068581	0.534683811861536	0.0721163341138677	0.303117620467406	0.0591149220508232	0.228049218052716	0.389612030549894	0.113953638544926	0.593030363693626	0.900661308757382	0.152626977451551	0.464262006499856	0.575274809903815	0.239490592388356	0.245104980381181	0.240076265372669	0.243325875676892	0
2011-04-11	0.155018719707633	0.248724651032149	0.892094020650581	0.964969437424136	0.254718673854235	0.333091149209574	0.277765296965897	0.0809286321780617	0.367789817032471	0.473798744591929	0.625635026780722	0.689773792453087	0.480190259373641	0.29227363262843	0.0240360448914537	0.392330468722209	0.434875301857248	0.485709545146523	0.111111111111111	0.666238802997544	0.524209250236594	0.361777261868326	0.42409185533048	0.435945799371532	0.552087918200565	0.218412383440619	0.242279543880039	0.496088112839688	0.511126211783412	0.0759496234052871	0.25695518261006	0.0350305625758638	0.144892704723064	0.30206287329494	0.0610648480963814	0.584151161214434	0.897462050820687	0.176478362577298	0.445649937991518	0.563608063530609	0.23798986773806	0.243675507682642	0.238211289534521	0.241985054807647	1
2011-04-12	0.151925918369428	0.265211429977765	0.895632804700879	0.900553028104742	0.285335737415188	0.307852516997674	0.330709037279833	0.0868518195737299	0.373199933863988	0.485967641266219	0.628311169956747	0.701886815213719	0.474161510996101	0.289906136167052	0.0223043354838212	0.408637654344151	0.418385823830995	0.493179452917847	0.111111111111111	0.665798082203661	0.506505300535676	0.366400965958866	0.41862202516186	0.431029824357959	0.54629906901681	0.210208363804777	0.255980941595696	0.481063698858683	0.524925699858948	0.0772989806257648	0.274279068434339	0.099446971895258	0.112620561589968	0.232515598461441	0.0852256161990956	0.579222510480932	0.898624156114497	0.160287459812065	0.474111363865918	0.617384953475352	0.237052457207526	0.242324647028216	0.237353779478268	0.241099845369704	1
2011-04-13	0.144725257560655	0.271631826054206	0.898511293838848	0.750384095325434	0.353377647909024	0.429539864446037	0.400348268618572	0.0854066026972427	0.408588480808546	0.504659325849175	0.63007169314402	0.721779941344009	0.470456564522285	0.281080333433528	0.0208807705196689	0.425157770488934	0.434410408856865	0.505179797192021	0.222222222222222	0.666155933366392	0.524526523675238	0.364275475119054	0.415985083636324	0.42653206648229	0.542141103277769	0.18755495967284	0.243004951200095	0.419349416101969	0.517440146079937	0.0678064293923543	0.333147541564545	0.249615904674566	0.145109791923854	0.197407131699283	0.192966846632791	0.579672101359282	0.902438330186074	0.164780167660042	0.513378357491307	0.636714775729659	0.236776567632266	0.241414850313858	0.23768150816145	0.240869396052555	0
2011-04-14	0.139673493977698	0.276509486028791	0.896002107989878	0.8997507270853	0.306274788143445	0.402963080218779	0.33114467009736	0.0868578706350568	0.408134617349879	0.485038763673902	0.628897095643772	0.709803014012785	0.463903396025813	0.202113430414648	0.0209317215298521	0.425590526947412	0.420376179373876	0.511655359989075	0.222222222222222	0.66669418695774	0.508662819502311	0.366710057619454	0.414269147409072	0.422566212292549	0.538202225901393	0.177624297720235	0.219087336440344	0.367738754998087	0.478744502434769	0.0425677552495215	0.329125018641961	0.1002492729147	0.113053811169707	0.162895209905841	0.173536827689371	0.576657646814529	0.899705991703669	0.169372280529349	0.48731517529667	0.568786607852383	0.235959027392238	0.240243760070888	0.237005397092419	0.240189671933943	0
2011-04-15	0.145728659550482	0.292054500958116	0.892230809992876	0.97132866303516	0.25043774247098	0.440453400300308	0.249623837841015	0.0922222255827143	0.38377223569282	0.45885123978563	0.625850808321516	0.686249307453795	0.455220638814727	0.138130626949918	0.0204818987194242	0.418090775481879	0.411650290095668	0.514102696474378	0.222222222222222	0.666719405189081	0.498106334327669	0.374147392942102	0.409152878686979	0.418297342866698	0.533226084357386	0.169304582863636	0.251132373045524	0.534765047600644	0.463576170603581	0.0498837020126365	0.283188148149993	0.0286713369648398	0.0659421852222625	0.123564729747674	0.130671442038819	0.569634015293747	0.895650719414571	0.154171222110582	0.457058584131269	0.55677909047907	0.234861273232364	0.238999152445801	0.23535865773281	0.238976875944939	1
2011-04-18	0.160395996106447	0.319281913380003	0.897301536903686	0.611805535377437	0.328501548604878	0.476555325001832	0.352832826032375	0.103612054000308	0.423850281020933	0.484766615360042	0.623515434512503	0.711504926605056	0.450023462167271	0.132578675742079	0.0206715195800854	0.447246022104668	0.426613735603609	0.530163433407543	0.333333333333333	0.666595745172384	0.515331915844024	0.373080504524966	0.405399116082667	0.414077984978653	0.529486298903386	0.17487210435389	0.325696476024713	0.569971549630912	0.478912390418858	0.0665376339428514	0.276117410518852	0.388194464622563	0.163826718303648	0.131257980238786	0.312728637459532	0.569253083067925	0.901981674998988	0.22888877300916	0.503638148761102	0.64330183600735	0.235012926440465	0.238319353803985	0.235319388724919	0.238565784755073	1
2011-04-19	0.166185204019153	0.323792562270708	0.900788268372402	0.432899151899191	0.42088151206994	0.526160127447183	0.459812741187014	0.10496071644442	0.47354437515911	0.518474282009382	0.636027557093558	0.743233445081884	0.45040881407911	0.203660816908748	0.0220856382595528	0.477559286534113	0.459658886574528	0.546950259127271	0.444444444444444	0.666130350224385	0.552335084408369	0.363603429935413	0.406792810688511	0.41100110468393	0.528820986163656	0.177467238347972	0.325647104166091	0.504509124120954	0.510747979887708	0.088232298609569	0.414180452669587	0.567100848100809	0.293421674218657	0.181286938035862	0.503710166328903	0.575804643160632	0.906449668364334	0.219185226740771	0.549262218857147	0.657436269694174	0.235801557636138	0.238244383727082	0.236742392163946	0.239025105183717	1
2011-04-20	0.173710661664511	0.304196383968554	0.906613641319488	0.29745407040736	0.481529606762538	0.440905641593192	0.532119770641791	0.105442504871473	0.461292968411438	0.542434716226385	0.631853116219727	0.74662936437776	0.452253375641165	0.305231812359728	0.0229966570752745	0.497537733281074	0.48593642971658	0.558392921811325	0.555555555555556	0.665211583897763	0.581595646450421	0.350032821660212	0.414941228275077	0.410285439529168	0.531703417124815	0.186566185397059	0.407401990685665	0.653876897389294	0.528513748827995	0.0982731984581892	0.57418748622127	0.70254592959264	0.428527288906224	0.261448951424135	0.667629654626474	0.586190233949783	0.902011706308387	0.182281145166215	0.57610049549069	0.643485172167687	0.236708634592528	0.23856243976993	0.23878819737744	0.240003290896099	1
2011-04-21	0.181016872137443	0.281922263747603	0.912880855947437	0.134170207704866	0.574212260954127	0.368943908494295	0.655013506228503	0.113072917090736	0.4356640289208	0.586071057032597	0.632691284086096	0.771429987088377	0.453848827007113	0.409195892348085	0.0236894357123866	0.548263469270036	0.521072588777554	0.591354867803864	0.555555555555556	0.669069472894794	0.62028801378545	0.329074665941	0.423720536456137	0.41159391794071	0.539385107813597	0.196260169760966	0.479288435172376	0.578747441473321	0.574235659221854	0.116364833911827	0.708339758897628	0.865829792295134	0.577318103251121	0.366441112055988	0.827160142373158	0.603294071350923	0.899169191650355	0.208052511857536	0.630238149140386	0.675668981485268	0.239349016910788	0.239480971976803	0.24215106303053	0.241901164816832	1
2011-04-25	0.175391265488207	0.261239152113865	0.91509693175406	0.0714557234010835	0.596949561752252	0.339100447935661	0.686011805864379	0.116017156351371	0.438082585505618	0.598252409130491	0.628800677741761	0.754320918063731	0.458429809039879	0.465316336704224	0.0250953789668419	0.578907523707404	0.531556490730419	0.63582706519349	0.666666666666667	0.668100871785148	0.631732086531398	0.310762851264525	0.433982374239137	0.414839350561691	0.550397221251992	0.19119617128793	0.405636097281826	0.335864951128269	0.595289536170804	0.111959850141739	0.664177064390213	0.928544276598916	0.699065462897672	0.478617092037334	0.924696942455906	0.619217450098128	0.900855273640763	0.170030230424605	0.618607138588898	0.622695053284619	0.243039467169645	0.240787434504736	0.244949965749652	0.243759785044562	0
2011-04-26	0.174143399536022	0.245571623129667	0.912280132840237	0.141771699976063	0.556967749568399	0.353006160893162	0.646055088570955	0.115793894955368	0.424142672079449	0.584137269163636	0.629243739507704	0.706920007500929	0.460705405871077	0.47523000676112	0.0255938173351027	0.559546003376312	0.522830990072084	0.658508907752206	0.666666666666667	0.668132268676549	0.622298188572919	0.300740305782219	0.439599519234584	0.418639197970553	0.562026166362788	0.192013813049674	0.36459478774597	0.376950172864779	0.594523413317487	0.11239908344154	0.608040766637364	0.858228300023937	0.75494322507148	0.572760770898335	0.915871502895652	0.629012301568971	0.898526178289203	0.171397569005361	0.558756427780111	0.580185904752434	0.245721738333377	0.2422154522351	0.246191396735173	0.244937592914535	0
2011-04-27	0.171054464485882	0.224678946459772	0.909318559773974	0.149105216058982	0.552717516033317	0.312899940131858	0.640541902090927	0.116551732941555	0.425251352782052	0.582891686401814	0.626695098466287	0.702184872199261	0.46782038233751	0.412153673366917	0.0255723532346864	0.54082287893767	0.531954592928585	0.666907436126388	0.555555555555556	0.668070971781942	0.632639710790446	0.294064859301355	0.44403888845887	0.422630232880515	0.573272952716806	0.192105793860263	0.33631045564231	0.426597331631966	0.596757992095892	0.111838489041978	0.557539574888663	0.850894783941018	0.789557775706647	0.647515955824216	0.889756116218614	0.636296879640099	0.899165076364503	0.19398550936667	0.528231152285007	0.600305828328625	0.247496912238631	0.243507356556089	0.246953885518488	0.245865493515186	0
2011-04-28	0.170804673637746	0.201786738444802	0.906317528243589	0.241416652727241	0.499325328340029	0.306735638446839	0.590057143660601	0.115040865110184	0.416514122208981	0.564873842395707	0.627610012218419	0.699858139339477	0.477268473971255	0.412331647194434	0.0256903797828647	0.542916502098286	0.534807736406083	0.664062285111552	0.444444444444444	0.668551328287743	0.636470188385919	0.293754911812844	0.447659145748228	0.426598718976705	0.58251037330569	0.192981983001866	0.315159766946644	0.445500160536694	0.584115368461579	0.117113795517313	0.515945987958711	0.758583347272759	0.779436955908043	0.69384623533919	0.811729166042027	0.638360925523997	0.897491845023332	0.200135112374683	0.48414352259887	0.572879498939375	0.248123779786752	0.244280312945331	0.246642356782307	0.246174547168184	1
2011-04-29	0.173013985194465	0.190605112415091	0.91468432891151	0.149649648694665	0.541201373561419	0.302124385280906	0.639018157323331	0.11733623624767	0.412226561483205	0.582855299213755	0.629839663044283	0.723121911938576	0.486217135857684	0.525090513098898	0.0261782353845221	0.582036820451052	0.540713488988028	0.639040241325638	0.555555555555556	0.667937838089657	0.642617498254733	0.289891115997056	0.4501762465841	0.4303128092534	0.591010142396214	0.213317672862611	0.478381310840335	0.662783670051452	0.608144326628887	0.114075346895853	0.52993436654327	0.850350351305335	0.80569113986017	0.733829245759202	0.812922251503101	0.643213231930294	0.896940557527822	0.243624273272541	0.50300604374746	0.63226413889435	0.24804142775349	0.245569307329971	0.247249690227091	0.246874892181597	0
2011-05-02	0.171622909068456	0.177820522807584	0.911003587507688	0.254175202577489	0.481787237326178	0.300998273832224	0.57859566205845	0.117989686995242	0.390785299693336	0.561384378508513	0.62753458594305	0.719948375069031	0.492953243793396	0.520278977344957	0.0258607572409477	0.543478959167371	0.515564731129843	0.596275911382248	0.555555555555556	0.667909002429538	0.614606310288578	0.292243586665862	0.448919311435272	0.433014776854342	0.597249975897961	0.213985563955554	0.450909035849908	0.475081653777974	0.6103547517208	0.112072764461991	0.49405154264429	0.745824797422511	0.785604281853157	0.75352519158087	0.748835418680049	0.642855537038619	0.893575608947313	0.203683808557677	0.47499943677783	0.568915418214061	0.247069343513714	0.246939095074292	0.24672624616464	0.246938204358343	1
2011-05-03	0.173136718361134	0.16569013843773	0.913608777313027	0.202046201723739	0.506933486132639	0.312504067103158	0.601026015911663	0.120817217224795	0.392426022528802	0.569899845733915	0.628480805226912	0.7013262097562	0.505176945276816	0.575211850175167	0.0250853379584025	0.524191247562892	0.534244315313833	0.568546504695683	0.555555555555556	0.66789728220799	0.635572738578696	0.29214917848506	0.448796750958523	0.43515009174209	0.602272948508839	0.20991088402345	0.39367492672065	0.387182682966831	0.611265470118388	0.112172650869352	0.489605431167941	0.797953798276261	0.790959758064858	0.768511307513991	0.740498209590551	0.644277025657392	0.894299127716387	0.113270795936395	0.499473204810383	0.619534557892361	0.246748677685017	0.248129110702116	0.246840261850507	0.247244201588472	1
2011-05-04	0.175857425272098	0.159564274386543	0.916845023192382	0.164852209224105	0.524937037510507	0.319926083619206	0.61110333801602	0.124215239432882	0.400967897629332	0.57438278449155	0.629942981697534	0.716209450900509	0.521063194168144	0.57890628017639	0.0247693394652389	0.509673467304065	0.555245929148535	0.551348846274805	0.555555555555556	0.66799675040165	0.659479100387314	0.290918948047511	0.448975698364479	0.436896684025919	0.606594535072148	0.207315050259888	0.367818994573029	0.477877610509155	0.601892187954384	0.109645157074191	0.498920766031259	0.835147790775895	0.807905838767721	0.784373276331598	0.753762684414088	0.646513096980741	0.894673708634651	0.110923518325228	0.513106291508493	0.614642968766496	0.24666490224986	0.2489814083246	0.247246606951389	0.247675931818275	0
2011-05-05	0.177821227536723	0.151878683972478	0.914051759681053	0.241416652727241	0.478416480151382	0.326006420340065	0.56266144032649	0.126135184599303	0.390668441503956	0.556646308910669	0.628338852348265	0.705906090266632	0.532949209625535	0.574863930252884	0.0246168718624529	0.461488577344339	0.531324225586168	0.545548452705697	0.444444444444444	0.667925534426928	0.632474546182599	0.293937517453839	0.448972484259502	0.438293269214971	0.609220197376275	0.20546649254921	0.331636604356565	0.475757926998971	0.605712876739124	0.10668726549124	0.475636646841161	0.758583347272759	0.791668997948759	0.789322424186519	0.715742799396517	0.645127301161238	0.892015238760496	0.126872666932492	0.492763460942842	0.577938973593693	0.24666490224986	0.249297287598656	0.246837504404241	0.247655814870712	0
2011-05-06	0.171581983693314	0.144742064302276	0.911722709286588	0.243856635283347	0.476921535439571	0.300119588979816	0.554110199861151	0.126742231607404	0.375676080948276	0.553798478474106	0.628518394077742	0.702191861556399	0.539800996425195	0.588018438140611	0.0238454724270523	0.451417982276308	0.511085990722504	0.541638256902214	0.333333333333333	0.667652264767781	0.609516659275057	0.296744260490551	0.448979877148216	0.439412121329467	0.610519480261085	0.202875323915517	0.285397529337918	0.349553038894209	0.624572420330315	0.0928810005250949	0.460033383266766	0.756143364716653	0.77996696696311	0.788567511225888	0.693770935110733	0.64368344439143	0.889648876824059	0.105857767112292	0.492086347200985	0.601868116564508	0.246163712517094	0.249003240235721	0.246543098917071	0.247627457476549	1
2011-05-09	0.152352856808843	0.138115203179945	0.913424987003732	0.326341356757168	0.491729921872179	0.323680997735214	0.559867225542595	0.12573646628711	0.373291750203654	0.555449253890782	0.628567395737374	0.709773674190657	0.543759986738322	0.656434738782478	0.023943302106368	0.466304907724827	0.499108648504698	0.552423702099497	0.333333333333333	0.667723045907167	0.596063838305718	0.298096901317887	0.45066693230953	0.440668662997944	0.611124443517343	0.198077237845026	0.223004563982432	0.218989861219276	0.610815723559737	0.0887511456218723	0.433479552520884	0.673658643242832	0.742502325160675	0.775084046560538	0.637329606400716	0.64325060003925	0.889198652163972	0.104570383621297	0.504389692760019	0.610923446488804	0.246354380697427	0.248609483790148	0.246573488115297	0.247728702438928	1
2011-05-10	0.145724936458272	0.133047562267193	0.915770309649773	0.434608196173219	0.520947058718616	0.392554097757013	0.578041525800976	0.119596810025572	0.397301885764204	0.560333456056	0.628907419720914	0.713412097214772	0.541285154482021	0.649503914951645	0.0246254300696924	0.475363275169149	0.477741239737294	0.55706854566346	0.444444444444444	0.667864058740574	0.572592715372122	0.29724852282782	0.454017897818865	0.442391857394881	0.611748158485673	0.194832329012327	0.197951896657968	0.367848732644512	0.594365706257184	0.0780736229888822	0.421522221091845	0.565391803826781	0.67859080288083	0.743951960735543	0.551259544264022	0.644530553614565	0.891828580032364	0.0867021254059632	0.516325554338478	0.618858572123473	0.246534924903583	0.248538876344379	0.247039824940046	0.248056456141781	0
2011-05-11	0.140286028563792	0.122746116735456	0.912976790065816	0.79120184203858	0.47803341249727	0.37010150966726	0.535282386476669	0.1108216227635	0.407772976627045	0.54431229486175	0.628555015897647	0.707170642654428	0.535238973248521	0.568621905015724	0.0252061806550327	0.480430457994584	0.462711599310941	0.554709218645837	0.444444444444444	0.668824878588567	0.55627903102695	0.2997160070007	0.457138567139088	0.444439031868233	0.611525207461534	0.192343171218441	0.197729249053031	0.295370309150817	0.568870867229597	0.0744724087734576	0.345040050629266	0.20879815796142	0.507744342587914	0.664004907789375	0.317066007513606	0.643031537336109	0.891218647863286	0.0964591043835625	0.497731359505285	0.583208783775046	0.246196931243415	0.24832634641513	0.246815399977296	0.24803070514456	0
2011-05-12	0.126027917120073	0.109197451308965	0.91029966713119	0.651013071301313	0.465313282526222	0.356853003964917	0.517592206652562	0.104020887715537	0.434943099281858	0.537932048118182	0.626251264194918	0.702286200255668	0.530020575449777	0.471419958953181	0.0267315399825458	0.463130128394022	0.469114785330657	0.554467800081579	0.444444444444444	0.665438737230799	0.563164994430812	0.302706473652314	0.460084458673255	0.446707943390933	0.610484369292847	0.191670614995629	0.194200080560496	0.270594895288449	0.535282776504482	0.0400871050042262	0.23298583961943	0.348986928698687	0.444261612937131	0.588712324774327	0.287313703015339	0.640948546776472	0.893976691311997	0.116151198079065	0.496275248931012	0.596852955618747	0.246170940060156	0.248313249428176	0.246506643220944	0.24792226093004	0
2011-05-13	0.13103981497721	0.101835200032382	0.907588323581661	0.988981112903483	0.360294327763461	0.348607471646741	0.402891517434129	0.0949195805533724	0.423812841088658	0.503137051433577	0.627999930489966	0.694081490088835	0.522409467939649	0.415943775413676	0.0272322272833028	0.453359686582656	0.449872039134332	0.550836269473119	0.333333333333333	0.66647572136906	0.541858072128437	0.312632800985357	0.460704305709496	0.44865587792603	0.606986612892906	0.192345814792034	0.1944448514635	0.495989322403315	0.50428139263043	0.0522707682053561	0.114827400404903	0.0110188870965172	0.280399184070771	0.481744663233184	0.100744897069699	0.632968279402656	0.890547706151809	0.114219098090263	0.450613574754645	0.548733733475622	0.245281189807342	0.247612353179488	0.244837169358883	0.247029930584652	0
2011-05-16	0.137135905925135	0.117977955268926	0.903848871707916	0.964298566930144	0.264852426436638	0.347108326191698	0.244302304900274	0.0822556005318098	0.3927807430939	0.462937648767366	0.622344932938578	0.673955742563326	0.514474856455281	0.408858895201395	0.0264980264454855	0.414271917454759	0.437264459114067	0.529601326039461	0.333333333333333	0.666575293987702	0.527213571220854	0.329059640210087	0.459840161018614	0.450029078247042	0.599858005312346	0.192239449831016	0.240380591238598	0.513474251285267	0.486518959896843	0.0700327202851305	0.0479375844022048	0.0357014330698555	0.180033941591316	0.375659839146196	0.0374361044041412	0.619268148479387	0.886374371453054	0.169097857545071	0.404837620839075	0.537433385269709	0.243215696054366	0.24666762643036	0.241988051698497	0.245346624385331	1
2011-05-17	0.13746320868917	0.138611643316312	0.907609600889159	0.751505071134789	0.319488828659432	0.328455732402955	0.260700602381644	0.0654920256058995	0.419898599534547	0.477065391061124	0.626128115423407	0.695665934517911	0.504250516530708	0.403159156897014	0.0262309878196121	0.420820700519349	0.435472558786463	0.509487075328957	0.333333333333333	0.666416749959053	0.525680394332948	0.337674015269212	0.461482116009669	0.451479435544468	0.591823207865984	0.18786410227884	0.278147906087418	0.503954303860654	0.498470704491972	0.0767966768891023	0.158105054005379	0.248494928865211	0.189648918139886	0.308267876512001	0.140931630017384	0.611407534140602	0.891385279767075	0.184936050422747	0.447921035474097	0.628553178542244	0.241293194413489	0.24578985208781	0.240773429338863	0.244345354633065	1
2011-05-18	0.139042630322261	0.137622828663189	0.910392947405964	0.597919973043119	0.385767249936766	0.29561977717324	0.334191832579226	0.0598896726794737	0.447395574586202	0.496548582360539	0.633085673913774	0.725510672411323	0.496772907751077	0.465714616214236	0.0267057691066847	0.448642648676474	0.460621523908581	0.502386695338503	0.333333333333333	0.665703818821766	0.553536130172671	0.339128848879008	0.463729668290563	0.453121270660772	0.584892832090043	0.185514820628867	0.268733877353428	0.436656045475574	0.525234992995668	0.0825275672283901	0.30673815647546	0.402080026956881	0.251291421776139	0.284696875124179	0.291279800687276	0.609156129925101	0.893360752241452	0.185093142157237	0.496822262900091	0.636338513419427	0.240230119602325	0.245083852083575	0.240863098216435	0.244019955147372	1
2011-05-19	0.13180100117959	0.13150881773557	0.912564326899245	0.525833698562216	0.397163100225009	0.345314955084426	0.357120101992603	0.0622628903427659	0.458831823654488	0.500585093859727	0.630502699823775	0.718113103479511	0.488712275360752	0.379169797099475	0.0274547276523831	0.451874662248269	0.456441062207964	0.494117927536727	0.444444444444444	0.666167642458898	0.549010429238281	0.339063328476918	0.464749469551543	0.454653236256842	0.579265698305837	0.173310607634498	0.236054801346755	0.163858301159594	0.515194463929107	0.0768029004104099	0.358823269760598	0.474166301437784	0.318310205829377	0.292202541216175	0.413117290199467	0.6082059974931	0.893345297551286	0.168817768384753	0.51325181958074	0.608580377154644	0.23935770845992	0.244631146124728	0.24108203264598	0.243841102691775	0
2011-05-20	0.133764817763801	0.135302876994869	0.909754441946391	0.767349319111545	0.322376066391574	0.3296735093471	0.257005085815577	0.0663788851730057	0.438660820311665	0.476128248121753	0.626721715226212	0.697871234776858	0.478882008438776	0.38869608992874	0.0271051209232713	0.42501850339707	0.43427817446799	0.495129544779304	0.444444444444444	0.666257539796313	0.524243000174688	0.345371309171112	0.465141054561883	0.45596270777389	0.573112721587726	0.161763244925716	0.238402257688756	0.394959387346591	0.509280504394525	0.08184343137453	0.318874602852082	0.232650680888455	0.276135160432763	0.282594138990165	0.342581745161043	0.602175637099547	0.889853872884687	0.199470583691415	0.481475676698519	0.554694930152292	0.23859506055225	0.243798500802839	0.239947592436999	0.242991772503671	0
2011-05-23	0.138449355578561	0.152936038038803	0.906565173754707	0.761024179209862	0.311636007331986	0.338879972991563	0.277108070877975	0.0745504673312776	0.446718409837725	0.476578582260102	0.623499009790911	0.694632440669681	0.469521861040457	0.316272918097235	0.0263372483411227	0.413858275176566	0.440913910619865	0.516421851095936	0.333333333333333	0.666442293801358	0.531367890381061	0.350686766995666	0.466925058758631	0.45739251677846	0.566799771353066	0.165013674162094	0.258081691409741	0.496113477119221	0.499001522633619	0.0786547540209321	0.277564940219963	0.238975820790138	0.250293120456362	0.267235173583279	0.311261239611246	0.59681056373155	0.892056328071921	0.255355210302706	0.483245525498635	0.595184332089198	0.238753937919732	0.242837754626776	0.23899356476422	0.242188300847444	0
2011-05-24	0.137651554196251	0.168652668239262	0.903888656082657	0.851912663127526	0.282706525631392	0.339889224892575	0.260398419424566	0.0798180038909851	0.434982208009045	0.469417489727364	0.629806979693757	0.701836797906142	0.457769887739165	0.303820616089388	0.0255341909680823	0.413489343945835	0.433879813189909	0.529268208599852	0.222222222222222	0.666563671372611	0.523334183790171	0.356947370856909	0.466304000763803	0.458403299211267	0.560140047389108	0.164545139618895	0.252569177898254	0.412110523037366	0.485439741458236	0.0766878104253405	0.303499311407332	0.148087336872474	0.200379631466784	0.239702583370018	0.248086529787357	0.590591728012942	0.889819592912414	0.269706707860267	0.464311261287368	0.582423023911197	0.238183408663739	0.241581513508114	0.237824659095344	0.241238335438916	1
2011-05-25	0.139686181130383	0.173557057746771	0.906334848065009	0.631621760645658	0.371528956853624	0.347127033627985	0.368792968654216	0.0809272882463791	0.440071553258069	0.497782723141517	0.63070423530566	0.712911351936022	0.448528539875064	0.370747300711131	0.0242916971258153	0.436052157685556	0.445989778416462	0.535130311990566	0.333333333333333	0.666129365447187	0.537222614482105	0.355126299975871	0.465242780325487	0.4589845533893	0.555216266057627	0.162823784449318	0.238999764856308	0.424366499807496	0.513590142745587	0.0885624268154684	0.358616121416981	0.368378239354342	0.246325339757663	0.237266105793245	0.34113923215121	0.59079032584755	0.891046840914615	0.266288286159641	0.506206373777732	0.644539538707057	0.23773708983335	0.24082092832678	0.238152163539673	0.241068761155696	0
2011-05-26	0.136965474219419	0.178111133718029	0.904484467251256	0.713375691957727	0.345865223406734	0.349971610345557	0.347809329252037	0.083431778353855	0.434127549597458	0.491257233193777	0.628923549586559	0.715008432369229	0.439262798898843	0.376236036534779	0.0245330782651546	0.454166387863864	0.433946293096228	0.535760232420753	0.333333333333333	0.666233621401453	0.523848026091731	0.355453672007497	0.462088132049499	0.458773657615294	0.551184533347749	0.158980650463056	0.201509239997358	0.40350601070055	0.507124958809815	0.0888203466944712	0.360966605265729	0.286624308042273	0.247555332069472	0.236067936768456	0.345053597623717	0.589454263714174	0.889723878741856	0.212376891052953	0.497144857851615	0.586486203589921	0.236938333535606	0.239978825143413	0.237941293384909	0.240694364546777	1
2011-05-27	0.138295105004374	0.180013690615564	0.906177200443155	0.601158183790954	0.390903535269666	0.376503381114742	0.407135351517283	0.0807637678182	0.446579748230826	0.507742979735715	0.628890171783806	0.70928956951169	0.433961404920102	0.375124825285096	0.0265193291157649	0.496824092560668	0.449307633538403	0.546162353163536	0.444444444444444	0.666074607620405	0.540921984085466	0.352019568755079	0.457155626551781	0.45754812710876	0.548818978593694	0.136689493665465	0.163737981802731	0.451580888385043	0.512890467245253	0.0917175938412422	0.384503805260119	0.398841816209046	0.288731167187143	0.249535145590336	0.408784296820299	0.591261725223629	0.891680398304876	0.167515252121007	0.524614828627388	0.624535248886853	0.237254641182906	0.23975391377601	0.238381812511747	0.240707090159568	1
2011-05-31	0.151204884284576	0.168977475032688	0.909650429900549	0.115950007417729	0.54599345721022	0.504942307085754	0.622834146555402	0.0790103867474262	0.484039185793372	0.56395754100735	0.636052061412807	0.740877222607028	0.435785355730919	0.393297313310369	0.0290021426790279	0.530439875342045	0.486069052725328	0.563248368912938	0.555555555555556	0.659111130647645	0.581670817188745	0.335733766673453	0.4553892676271	0.456189251500088	0.551038960260263	0.135996410871228	0.222113417765684	0.536890676515761	0.545769034967721	0.130135440166106	0.578641764463267	0.884049992582271	0.490673066417589	0.328479096975271	0.705143256491303	0.60378306641881	0.896308233367119	0.148297929065621	0.602015894825385	0.695482999701519	0.23919446050421	0.240811449436465	0.241188059730272	0.242097016906511	0
2011-06-01	0.156769088551514	0.171181019800241	0.905038771374702	0.307060644442374	0.508077722150233	0.418634396629583	0.575410392623143	0.0787893349572774	0.463580474177367	0.552088678397179	0.632239633346222	0.729054658607237	0.441763591384622	0.491698677066692	0.0289905994426708	0.503209330017375	0.498510717967702	0.586817271697056	0.444444444444444	0.659581781409627	0.595511926621197	0.326432699294616	0.453851537287217	0.454772684623521	0.55528003471448	0.142697947680524	0.319196104540908	0.560157055261228	0.545361397328474	0.130273134661863	0.628757583037177	0.692939355557626	0.556573485478912	0.403940590522096	0.739418782533319	0.611387750488885	0.891576461245779	0.179607611733092	0.562808514989998	0.58223528749601	0.241118390058557	0.241493429393848	0.242499477498322	0.242927085932342	1
2011-06-02	0.15429055446924	0.171644779604393	0.907855430612547	0.282524482102196	0.516088906432399	0.411175182472689	0.594111530622588	0.0753402077602533	0.453473634254895	0.556253707562617	0.627325970627712	0.701431594878769	0.452203503837384	0.489888894680616	0.0289801524138618	0.502853558257851	0.524356944866421	0.603533872599637	0.444444444444444	0.635686075771611	0.624611504285596	0.318754949390879	0.452727672915942	0.453398637579192	0.560763863826981	0.141296542667811	0.315337547828792	0.463668128796868	0.550003197427725	0.130283106398594	0.591591037097089	0.717475517897804	0.609330832234344	0.472526830179238	0.756588796155678	0.618058057548574	0.891494842758748	0.162069926936354	0.546494820396183	0.607867123103511	0.242464578604362	0.241946874772068	0.243516045928646	0.243684357003878	0
2011-06-03	0.150024463579738	0.164273658192154	0.905251055583753	0.393128290079265	0.471139547232311	0.445199037465321	0.543790008962162	0.0718650299652012	0.445791018376074	0.542690332915736	0.62743652469267	0.704448540458213	0.459540546386459	0.491096249256163	0.0299378079973411	0.515080471716368	0.506109039637647	0.622210573217908	0.333333333333333	0.670889205245278	0.604185159622087	0.316430833889488	0.45194454185865	0.452131610211445	0.565882946667597	0.140665661605164	0.303445340103079	0.44416362667401	0.562645794813296	0.121218619460332	0.534969272817844	0.606871709920735	0.604726877944846	0.516655880652955	0.692132841671855	0.620593219139384	0.891014066578081	0.158642091717855	0.511758294243723	0.579112467700153	0.243683652398192	0.242158673238802	0.243552345488409	0.243951777440765	0
2011-06-06	0.151292734941152	0.144484565224581	0.901410455021739	0.617657439211558	0.389552083766901	0.407467526253566	0.429452550249581	0.0678474656703694	0.409377441605374	0.515629510590192	0.628014797485434	0.686527660610723	0.461086014465839	0.489164843691064	0.0291505489552702	0.494659249685629	0.475817390008723	0.620078592040217	0.333333333333333	0.669377827685384	0.570287979986458	0.321493209906868	0.448204744002498	0.450316717986781	0.568791038564651	0.145714187397467	0.34865114877977	0.458501980305269	0.569620558633284	0.113362934735768	0.479315986247036	0.382342560788442	0.520912042410878	0.517036335639432	0.527490508712512	0.617059291584408	0.886151485492802	0.205631224147571	0.457621430269556	0.554292475112757	0.243774668911136	0.242363924348752	0.242274457531785	0.243455670173945	0
2011-06-07	0.153154238087508	0.139829680283144	0.897005796297064	0.867138997559338	0.313845689500882	0.334643910917532	0.304868518602987	0.0666593868285233	0.359481096589059	0.487075485359017	0.624003914883045	0.670927311403821	0.460986627772753	0.481651069217811	0.0282571396660837	0.477680736223105	0.45372033447528	0.5807714583424	0.333333333333333	0.664149699730371	0.545260438984716	0.332760907032021	0.444013812198183	0.447966876179661	0.568305329544866	0.154740047411937	0.405771202588394	0.486638424856062	0.535828780454542	0.122692748229088	0.334796952759901	0.132861002440662	0.375316527297239	0.466846213462956	0.305371866496414	0.608169545573629	0.880542549578952	0.196696072994678	0.410599037585299	0.548002753593527	0.241493969649593	0.242192154557213	0.239975740750364	0.242255409396198	1
2011-06-08	0.151313154669966	0.138951042736571	0.89978038978584	0.858827047475195	0.317342778941925	0.284944435920013	0.323929443797416	0.0644810293226254	0.341418855196326	0.492773182145479	0.627074593545505	0.687962231222975	0.463456484420842	0.415132548469177	0.0272745961879396	0.45816791989193	0.472001220577298	0.544373606229711	0.444444444444444	0.665635146755335	0.565835684203419	0.340717258509132	0.439554198319108	0.445131508232901	0.565901057101356	0.156173797325077	0.383415690389916	0.452110577379667	0.522329432112092	0.117260266451506	0.320055209177647	0.141172952524805	0.281242007373427	0.400792597851465	0.204094068775464	0.601534515644239	0.879678432823428	0.188588042579315	0.435792767792315	0.60449604562942	0.239577241696753	0.242195783452444	0.238491465491171	0.241299843284758	0
2011-06-09	0.149635686835478	0.138135165014752	0.897493288743795	0.890006925542784	0.307859464034473	0.270399443036674	0.320247872959094	0.0622702783309295	0.33370579821993	0.492890548816717	0.628552910257077	0.70773270999139	0.466845451796628	0.361921688595031	0.0262947576612525	0.462665727507174	0.472233977973388	0.511048922195265	0.333333333333333	0.66586092316439	0.566074820555543	0.347262245194291	0.434709231690422	0.441825155627163	0.562300306269802	0.154482376738827	0.344934205379796	0.46390665186145	0.516928083180882	0.116775694860232	0.325145635489041	0.109993074457216	0.207312703005667	0.331142933260016	0.146791445569825	0.595765878795171	0.878175592531217	0.151488230038262	0.450114725011316	0.595763146920337	0.237466967178764	0.241810759657651	0.237321130549798	0.24041873904086	0
2011-06-10	0.150085794364109	0.149794037536948	0.893885365083794	0.984138475264425	0.242193010607761	0.173311558190461	0.220187800794311	0.0679130195757918	0.312189058041101	0.467693141110612	0.626242749304695	0.6911544892286	0.470116048189898	0.355960620109717	0.0241960590574172	0.427269775051383	0.461019703830722	0.474120234048293	0.333333333333333	0.665890698645421	0.552991472120025	0.358866316248859	0.429285177480719	0.438017942893737	0.556484089590545	0.157591219283674	0.370160281537414	0.506331118966433	0.515294671880475	0.118139500861685	0.278478062073401	0.0158615247355752	0.124174761230053	0.255905431572772	0.0784721573280475	0.585705160051115	0.873978021852978	0.205493727330063	0.428641388588025	0.550755583774325	0.234933492268299	0.241148431432515	0.235193000766287	0.238957773126914	1
2011-06-13	0.143294215471728	0.161890451625544	0.896624620549833	0.939047611079972	0.256332474605636	0.219820599028476	0.271690417948189	0.0759559111772721	0.314585315330043	0.475260018563712	0.627671038242264	0.694060413681679	0.469495016578676	0.360186769202405	0.0212841521458986	0.386949566906111	0.448113352851896	0.456492086809306	0.333333333333333	0.665659239862985	0.53839388329636	0.365994703937646	0.424549753735586	0.433957584567447	0.549998989361047	0.157684444128894	0.353549597267585	0.420205323905914	0.521204043731962	0.118694123625295	0.27600574685914	0.0609523889200284	0.084965115600388	0.19216232490119	0.0817530951314149	0.578905929908069	0.873775253265854	0.200718427623604	0.461303779775352	0.60920697285097	0.23328108959624	0.24036164716215	0.233943028210817	0.237855105682732	1
2011-06-14	0.146332287354443	0.155637063215019	0.899406244396229	0.730489440675083	0.365422415297186	0.308764546467665	0.403706328281367	0.078348305238044	0.342910750143424	0.507710576980425	0.631645180472879	0.723190514790776	0.472319945480973	0.361559743972062	0.0209213350152109	0.421705115909238	0.473394966890753	0.479365641617815	0.333333333333333	0.703343315438509	0.567422549820991	0.362943038345883	0.421862282929784	0.430133493891462	0.54549068333255	0.154485331321078	0.342252993953765	0.461035582921987	0.552705676912513	0.129901693738424	0.355060573588864	0.269510559324917	0.133827375539972	0.166595986259918	0.209575873290248	0.580144461882963	0.87595764722146	0.15587717147109	0.525682988975606	0.656748305371632	0.233338860313413	0.23924151092766	0.234517897384838	0.237726080902032	0
2011-06-15	0.148533408108299	0.160233381135473	0.896087310337189	0.926108176810404	0.295400542515562	0.213707737578468	0.302254336154879	0.0849894970846897	0.354837731803527	0.478837174786525	0.626306952182417	0.706549111302417	0.471588282675132	0.297904599356713	0.0202179121945796	0.394627308229513	0.446521177231155	0.490116242705504	0.333333333333333	0.665863913987386	0.536616793548506	0.367350336654148	0.416790746001805	0.425987619286455	0.540771833618585	0.153009750743444	0.356475443811855	0.518137920280065	0.512916176486665	0.131373946640651	0.310359015330008	0.0738918231895958	0.0960534919091838	0.136464429652288	0.173443492989811	0.575618322904632	0.874586883935819	0.135862893856688	0.47983298846861	0.549971810678511	0.232545904773154	0.237876098318106	0.233529137596961	0.236867221047514	0
2011-06-16	0.164673585623045	0.17873388863284	0.891842231418747	0.784491372684143	0.277444692837703	0.2173042669228	0.302615662979262	0.0959538109717535	0.380975142691188	0.473993537596037	0.62406618353717	0.68815363761154	0.463501650209769	0.283090425799831	0.0192352083712204	0.398644642642632	0.406673960802608	0.501619570439139	0.222222222222222	0.665844848047641	0.492116039489685	0.371920607143603	0.412325800829612	0.421714282845263	0.535852428426663	0.157891886903745	0.405373405493646	0.630644498615814	0.513455221501293	0.131286519493201	0.290395149265033	0.215508627315857	0.121799365023886	0.125296770712601	0.237900479155707	0.570893253077897	0.876395784595512	0.229605802956862	0.475818247731619	0.587771661724949	0.231631595762127	0.236352007220498	0.232486557951049	0.235954009814139	0
2011-06-17	0.178113547553567	0.191684993038659	0.886728926613612	0.923090107521182	0.225761934082203	0.152531903324447	0.244725747979084	0.104528906800329	0.359344426083606	0.452239098181708	0.630091875355272	0.683217061054659	0.454467188118101	0.229185131303364	0.0188666516642	0.399586235251772	0.398113882670323	0.51839503396741	0.222222222222222	0.666340871082664	0.481408558719507	0.380924786407248	0.406747386926779	0.417100410709867	0.529703816948597	0.167717816690786	0.473617727605369	0.689575968399511	0.484817627475933	0.132977479683968	0.304427489159778	0.0769098924788182	0.089120181149472	0.106529469361212	0.197470185701656	0.562552870656427	0.870822661691833	0.315920369114968	0.446473989689306	0.556318488904466	0.230816946313745	0.234664883528905	0.230609970751207	0.234558120610864	0
2011-06-20	0.177924385830117	0.219052556336947	0.88140256938154	0.874815697433636	0.180394470000213	0.24197532001664	0.227054414320294	0.129769899260233	0.375431571626831	0.43003212800344	0.622298995305733	0.667567352733903	0.442924211132205	0.150979145793546	0.0190139972285676	0.40294420033142	0.37976607622613	0.518341876493759	0.222222222222222	0.666734480913875	0.459656298951695	0.393248595110591	0.401986345863792	0.41238923622397	0.52177922855385	0.176122747919663	0.528269257548389	0.544370482223785	0.425251915329295	0.0854307262230874	0.227752077348933	0.125184302566364	0.0846945793368639	0.0924846187307939	0.206446206515181	0.551363365953058	0.873227758088525	0.249982709693374	0.415382968924225	0.555217116307941	0.229187664335386	0.233011238882337	0.22816773987931	0.232762021015589	1
2011-06-21	0.18430681120818	0.22034390653785	0.885504573538623	0.598557796334355	0.346809005272836	0.280657309289226	0.385821778230064	0.137945434903948	0.423197478116468	0.488102096524658	0.635744273808209	0.720361561125962	0.43507366148459	0.136341516594212	0.0194779743032714	0.447074482734937	0.421703316241054	0.507283856937666	0.333333333333333	0.666427890974089	0.508673462779587	0.387836565688434	0.403494793211443	0.408943488997843	0.516682803372289	0.179171254784868	0.52497319882093	0.427700676341922	0.474543642039126	0.138991618639375	0.327225372095437	0.401442203665645	0.181092487539291	0.116519891996316	0.365061477842211	0.553960764962303	0.878177755411854	0.286123305203165	0.514192245196619	0.697755497720279	0.228156363418668	0.232520675901964	0.228946044037079	0.232613740760841	0
2011-06-22	0.1901164388497	0.211623765475301	0.882257246698252	0.66795400226476	0.318468401553925	0.25920077783964	0.357134243291788	0.141762044025706	0.417438804259636	0.475691221324257	0.634254831808871	0.734422985820241	0.427666584854982	0.199522332159456	0.0192512117606438	0.438238687498902	0.430694555168723	0.509103004946441	0.222222222222222	0.666498354052671	0.518186193976571	0.38626737567946	0.402987061825113	0.406078107236802	0.512983623662803	0.181077737858089	0.491490025228474	0.48326075444824	0.461709913713056	0.138149882391624	0.377200501262764	0.33204599773524	0.220401384811198	0.146162566946238	0.404814592520751	0.553883916945609	0.874156177211795	0.300622433426106	0.50399742290672	0.577317455850933	0.227558374461772	0.231819777379889	0.228816281656693	0.23213629195487	1
2011-06-23	0.210072699962413	0.213906837461127	0.886911110649146	0.441990885279137	0.433933864791523	0.322385307359894	0.480926613539126	0.14321415161041	0.458270084070947	0.525389610468872	0.626465052313253	0.733765843334423	0.428694177660443	0.280865194406279	0.0198481428482671	0.502850088924824	0.479201388233093	0.527158764468552	0.333333333333333	0.665833461426207	0.574015610424113	0.372462416356533	0.404198649853768	0.404045390601868	0.51339389121162	0.188451286625046	0.511706816147283	0.577125395177293	0.505966067115955	0.166160148187724	0.414340352999205	0.558009114720863	0.327868534819084	0.203157962788149	0.54370358703782	0.563795834839013	0.879936736572542	0.43208455100657	0.580548370749587	0.683134422060701	0.228435126867168	0.231800852563382	0.230808310727415	0.232886864280075	0
2011-06-24	0.207658833127915	0.210232335400192	0.883254533189725	0.434068124397324	0.380020268415285	0.301273727771081	0.419775046055073	0.143420136028586	0.451088262331979	0.500486443184741	0.634018261875734	0.726478739033791	0.428941237081925	0.353153721472332	0.019587171959375	0.477210759983225	0.462347125685807	0.544117663270314	0.333333333333333	0.665788221637629	0.554541855797514	0.367851343715412	0.403413406347727	0.402250974958964	0.514945863599896	0.194483921563261	0.491970447211236	0.442268101882743	0.507239702921088	0.165428477708325	0.472427035736671	0.565931875602676	0.402362497464561	0.266964448563771	0.609452843428662	0.567016259883876	0.876587901194255	0.402324211796104	0.531155139754836	0.557361020378256	0.229314766680529	0.231833601282584	0.230959616264839	0.232854899077221	1
2011-06-27	0.208969576379694	0.206332037501784	0.88607975922096	0.12148576392306	0.448009157135197	0.300205643398629	0.500343500320887	0.142360770087532	0.459572646805917	0.533845531438691	0.629847037022248	0.707246156704755	0.432094590461112	0.421315715598117	0.0191206755868081	0.476555380746743	0.483713524041541	0.584055056147738	0.333333333333333	0.859062322299952	0.579185442384731	0.356108296386769	0.406468307047327	0.401469970145674	0.519182639099361	0.198266408861223	0.446487630396922	0.357667571878754	0.552498540299246	0.167387813869014	0.541979015657476	0.87851423607694	0.56443650897074	0.365655087817852	0.802917004579841	0.57623176396389	0.878246489192626	0.422694678744754	0.566982217499417	0.655411432437972	0.231729801469746	0.232229543022152	0.232432513239066	0.23358205122615	1
2011-06-28	0.209330759282842	0.195108667870838	0.888526579745218	0.0596636968863425	0.483598969375516	0.246347613964211	0.554750838390586	0.132037717769659	0.464828936849761	0.555455928792356	0.631595273492685	0.727824559852616	0.438686844907649	0.473959922873657	0.019131813834022	0.517361841512635	0.512943723256638	0.608054387968187	0.333333333333333	0.672159933989381	0.612798346642507	0.342639715185114	0.410676449366597	0.40174678176104	0.526065584767984	0.194838238176828	0.395138576553353	0.425857989876682	0.564198636522928	0.169818079812088	0.629315608575568	0.940336303113658	0.694718400862785	0.476586970771193	0.918732944680978	0.587392107657739	0.878626552541886	0.375428999208718	0.565354051710153	0.632113551014562	0.233168440081434	0.232434800952266	0.234190899865138	0.234603303446146	0
2011-06-29	0.212542427499652	0.188200534275639	0.885595502601081	0.10498189882251	0.46838743675487	0.298143471470289	0.55322935660544	0.114788975352695	0.464670898383352	0.551864463746129	0.628205951159357	0.712103179560385	0.444054427446589	0.467688328546285	0.0193826639671401	0.519256397742933	0.50657325903025	0.6295548013523	0.333333333333333	0.673111150271017	0.605496021302044	0.333938856131286	0.414901013590809	0.402873364994314	0.53393332474079	0.189225153918185	0.371369162471352	0.505923291811887	0.5624206104199	0.170105771973849	0.596043437736178	0.89501810117749	0.765275591003232	0.574987160500169	0.933312080355789	0.595223340188062	0.878478694377719	0.321993993246475	0.539602506389844	0.591532143527364	0.234819385514785	0.232965386924364	0.235068952323566	0.235277341254447	1
2011-06-30	0.206691774245893	0.181785838794383	0.888280563787191	0.044437361108775	0.487620198755349	0.330941885087414	0.600985612048217	0.0981546033753313	0.480956369253809	0.56401653155807	0.628948000796095	0.709301468194732	0.445200410733456	0.530854072879738	0.0210864655900413	0.550418377400984	0.492605561269563	0.627086513518489	0.444444444444444	0.668596360854492	0.589287156520887	0.325201220210146	0.417783549581719	0.404392229284035	0.542610636433493	0.18878562093234	0.342725274332022	0.389506402985706	0.590388981952831	0.160745120511853	0.581632337558808	0.955562638891225	0.83408684150763	0.664427980999353	0.95572698852147	0.603380378370414	0.881055940049552	0.193501566280823	0.534197707898459	0.617515745169346	0.235460701381667	0.233730343262037	0.236047375133851	0.23604463167203	1
2011-07-01	0.219088454141185	0.163744995024562	0.891899777922177	0.00797180687701491	0.569031868796827	0.394837080934293	0.756528673951107	0.0913458735219986	0.516568232718382	0.606815297490261	0.633415843661009	0.734138316839337	0.454740806724114	0.593977141453815	0.0234285194896535	0.611058748644364	0.536666064824023	0.641384849021386	0.555555555555556	0.66807406075312	0.639247962425257	0.309025520286776	0.423664006070116	0.406867237827642	0.553858008112725	0.192175148790985	0.356603982862591	0.51245315378105	0.616711887742496	0.17183085747892	0.627931398956272	0.992028193122985	0.893074809600916	0.744492464551779	0.970680766342662	0.617965349472285	0.885629391864548	0.183263471957361	0.586510673685506	0.670898868301722	0.237903190232319	0.235404367693287	0.238529834226323	0.237677265917306	1
2011-07-05	0.221716899963262	0.161039445792407	0.894851713345875	0.0111744286365727	0.624708884431463	0.497980195798188	0.835505617425731	0.103802265728866	0.549385551681475	0.638170347764269	0.637095307942356	0.74520760347341	0.467168063484678	0.596446429672	0.0261658263288017	0.589447344938003	0.562412545955272	0.641459805017223	0.666666666666667	0.668059624907916	0.667861570143805	0.289686598386908	0.430384137610375	0.410287066339303	0.568077603798391	0.189207037663859	0.341657667334114	0.465513900519007	0.616832375665288	0.171905571627892	0.669415260568574	0.988825571363427	0.93124838969009	0.811094598624157	0.961778797446143	0.635829570141929	0.889133347672323	0.183614893290931	0.607157494368862	0.657029139196629	0.240415010710941	0.237887015694534	0.24167257628621	0.239829911125007	1
2011-07-06	0.222574814965181	0.167123603722451	0.898548354531995	0.0587553638865563	0.644228734234769	0.591467289764904	0.801868179558355	0.130187425675147	0.566330805310713	0.64538203643789	0.632816298759867	0.730122398134963	0.484723516176144	0.665418091892025	0.0289478536637339	0.613677535858345	0.586400573976008	0.649543631452345	0.666666666666667	0.667715888099836	0.695387026712912	0.273288708741302	0.433807524751608	0.413756406906383	0.58400629773247	0.186842283333153	0.3592092389658	0.475871162947062	0.647425812258667	0.158453346476241	0.650658152798682	0.941244636113444	0.939586310845704	0.858384819689928	0.918700204541214	0.65197491511792	0.890939595076439	0.152869233440799	0.597356655276652	0.622942163450647	0.242798274989394	0.239812876929611	0.244329580329327	0.241899643671825	1
2011-07-07	0.213014529911494	0.179290189461957	0.901871176239123	0.0185344509522659	0.687055517926875	0.63429521765789	0.799902814873107	0.163905711188571	0.580980512361742	0.668358257560088	0.631850680830264	0.730012361726466	0.511226008955009	0.743502883370465	0.0318634648751743	0.595777563056487	0.620839263996449	0.664047098062143	0.777777777777778	0.667606937560105	0.734337895171334	0.255599755396599	0.439633975689307	0.417780225513468	0.601716264766161	0.188673346806821	0.358526790090804	0.400319479460065	0.673578069445292	0.157443093317576	0.650975638861522	0.981465549047734	0.959609234158639	0.896848877054515	0.909596626729417	0.669763790557302	0.893596057634644	0.133484641165676	0.612601338192685	0.649495297559892	0.246143516451852	0.242330461217443	0.247412642657309	0.244313259069215	1
2011-07-08	0.208739102652297	0.183757562189653	0.905942009373515	0.0064583213166065	0.705559109100949	0.70919501761612	0.775070996075335	0.191216301989781	0.609881392762458	0.673884657718383	0.628678443833184	0.73129608742774	0.530883901123174	0.840043531766824	0.036486118569657	0.631446333235436	0.596055472015237	0.688505646869558	0.777777777777778	0.667494595722532	0.703878337866977	0.240916870885925	0.445671959409911	0.422292948505609	0.620095947156365	0.194630950906306	0.386565183670743	0.403949586768611	0.702001202378917	0.14131591418053	0.613369685483103	0.993541678683393	0.977300686805904	0.928621052161639	0.904333371898505	0.685553563052311	0.89861683253627	0.100156412914777	0.595362146093851	0.624030012819737	0.249615864771027	0.244403341303039	0.250073265143035	0.246620343976586	0
2011-07-11	0.204037424293783	0.188683675171376	0.902261593880311	0.13870941034483	0.615852177344031	0.720577579611387	0.684013423845942	0.208845853138678	0.58482966159691	0.633880901175145	0.62957144434897	0.700023255066321	0.55046254344167	0.858967076670196	0.0380277981204308	0.577404777750623	0.586035478559077	0.679619835739473	0.777777777777778	0.667507525653726	0.694172381914228	0.238376451714667	0.45019746793468	0.426872739656656	0.635656475234173	0.194873071146518	0.393274906423735	0.37361049762586	0.701423546735109	0.142020132405505	0.573576772752367	0.86129058965517	0.941534639851622	0.937410816640242	0.823237617338991	0.691255501579654	0.895378143781274	0.104905469425416	0.516414720576356	0.553824786476602	0.251167152897521	0.246415810087024	0.250470159059744	0.247752002725455	0
2011-07-12	0.200887101180931	0.179422655459417	0.898506894045504	0.152552850760103	0.612045801946574	0.727290396234415	0.661546342389139	0.217919813991372	0.566973723286158	0.624595735485113	0.62507918956746	0.691097995059106	0.562996742291533	0.77730706673736	0.0386453180164523	0.560952588920289	0.556606409600839	0.662207498356915	0.666666666666667	0.66757630883631	0.660033482863462	0.238253821547518	0.456144457341476	0.431810744698703	0.64819934556398	0.19826462056144	0.400888217925419	0.433836141906025	0.6598030121031	0.123820543338229	0.536053808120263	0.847447149239897	0.912712208306767	0.933284694160442	0.771967968407858	0.694618876069065	0.896040778205145	0.13629091035934	0.498621573656802	0.600503316777751	0.251791137549251	0.24799594587668	0.250674477282476	0.248644810106201	1
2011-07-13	0.199430040405287	0.175453639981273	0.901762997193234	0.0551349633367693	0.650459424733388	0.694774630099879	0.677138425483896	0.233389129148525	0.546299369554516	0.640670639117314	0.631379388524482	0.719032838165907	0.578838468857323	0.778822512553386	0.0392820886742682	0.585868165410941	0.586964383688132	0.648479879874824	0.666666666666667	0.667490852534639	0.693876833830998	0.234608759363555	0.465162895243633	0.437693394002301	0.659229354789984	0.199849365178013	0.388047309905594	0.453363332741051	0.685966367544866	0.116453738858177	0.555398595467436	0.944865036663231	0.92853083084168	0.936014545841312	0.799521742888496	0.70067469548158	0.895633284967707	0.143176062779924	0.523722482316986	0.639276769704787	0.252695322586102	0.249652495344474	0.251840300627878	0.249940592609895	0
2011-07-14	0.182451093174334	0.175757657371084	0.898183520874331	0.115433604087981	0.646235180601179	0.68434509954307	0.654412936694866	0.24325386815951	0.514108613337657	0.63031400412781	0.629426329438144	0.719067723541779	0.588615552979117	0.775585252169992	0.0388697664231216	0.576957902566653	0.567256381779542	0.618976112963496	0.666666666666667	0.66754982083251	0.671201452247792	0.233744410394821	0.473333002368483	0.444149999617878	0.668235424330634	0.200719567402952	0.389717986747417	0.396563551640004	0.650698167937203	0.102528483873057	0.545650732881267	0.884566395912019	0.917391885314181	0.933975191534849	0.780266385499683	0.704196945616807	0.89345220282735	0.155385602548561	0.512636274729428	0.600527066069076	0.252777648677807	0.251379650552996	0.252557225289341	0.250967675826128	1
2011-07-15	0.179238436906131	0.182292223208183	0.902211403645119	0.00232941266149606	0.706509923663119	0.725523899962509	0.69163613677591	0.251210937480804	0.531194757474792	0.657797343190626	0.630540940272177	0.730984522479156	0.598902286386338	0.779156725618098	0.0384393874812166	0.572858006344645	0.580295252135149	0.594303877478485	0.666666666666667	0.667419549609565	0.683982773613995	0.226372949606875	0.483589147703037	0.451512714366634	0.67740774698378	0.199994139708288	0.407128785898595	0.473500544014633	0.695356465607274	0.0899660349850141	0.566983695198703	0.997670587338504	0.950640632328089	0.944135151115925	0.832625478657987	0.71308319388737	0.898671779077114	0.186009747757504	0.564084984297603	0.663049953207714	0.253530172611301	0.253508568510477	0.254759255734729	0.252754615948214	1
2011-07-18	0.184166951817344	0.2052484011269	0.906972468910048	0.0219903389201553	0.76642092617518	0.855311613114306	0.731438292665435	0.265130425036301	0.566863357681514	0.690268235315698	0.635660015109534	0.765523104984142	0.613180106976145	0.789827735065263	0.037708840712189	0.582804212400767	0.613805736542308	0.605575638422791	0.666666666666667	0.667412533445747	0.71889520445459	0.212553812458748	0.498028434708745	0.460496575374466	0.688560155235328	0.198817671707436	0.445573984941355	0.564568962650544	0.70423062443078	0.0975768740985994	0.621455702887425	0.978009661079845	0.965735969840558	0.956138464515574	0.847112532813508	0.727651475412486	0.903864643222124	0.184770444176624	0.620666376568711	0.67603553492798	0.256390084782712	0.25573137738294	0.258368510622031	0.255392293796342	1
2011-07-19	0.186219635748696	0.232322656678902	0.913782883421097	0.0425169604056301	0.784350133269528	0.85372930494311	0.729059731825197	0.265065473239702	0.591194153848531	0.688705368317844	0.631056698211593	0.759101204507207	0.625645913467283	0.80915762588272	0.037456547758311	0.585177741025144	0.618517001173814	0.628848854176312	0.666666666666667	0.667412880317671	0.723003798633501	0.201043526885798	0.512164526205203	0.470712392240524	0.700707541454409	0.20377437219348	0.538161151369894	0.672046861651657	0.702251879570023	0.097520804203656	0.644925823808154	0.95748303959437	0.968417711646339	0.965069803283482	0.841144888319504	0.740617117317775	0.906809937046817	0.163532565417068	0.612896532586913	0.627460344661485	0.259726652742337	0.257727104371025	0.261510135407286	0.257954192280608	1
2011-07-20	0.214632184837666	0.276128135415823	0.921609231166842	0.161206424584975	0.835359500782224	0.684014788107639	0.752506382785503	0.293586563660103	0.528701096233524	0.724251830144433	0.638061058393835	0.788202477894568	0.636802375390127	0.874583797261988	0.0343552624640499	0.602879550516968	0.626678899383957	0.656058095312471	0.666666666666667	0.667383561183615	0.727996183917584	0.18377768239743	0.526659864790657	0.481990744272529	0.715376325685269	0.216213552228928	0.626866027400522	0.663149801486732	0.741237349755417	0.102570415779997	0.715505120428857	0.838793575415025	0.927522244073816	0.956855178515277	0.771364622016004	0.758913965108537	0.898209557822869	0.194712128904596	0.649737979459439	0.68298262980231	0.263898096668718	0.260284719607439	0.266027911038059	0.261380826261005	1
2011-07-21	0.220503272139825	0.309880025185209	0.925986862589542	0.156739548057371	0.837149888671932	0.731412280527986	0.722421609229562	0.306565793656773	0.500092641247285	0.707537216787745	0.6258881148952	0.77295064760422	0.645655000153762	0.801472446353978	0.0302049963585628	0.593183930764002	0.607501804038222	0.690187373040287	0.666666666666667	0.667384905180914	0.706803639060773	0.173354344715228	0.54212930869665	0.494327831357323	0.730137136428759	0.219988730823428	0.593746302271645	0.557483718567163	0.736256918488183	0.104955792902256	0.630143168074465	0.843260451942629	0.901864984325576	0.942489417973041	0.739158294936215	0.771698708391387	0.898796657152964	0.215805056668165	0.61016809126757	0.605733887915308	0.268161985021513	0.262474782034088	0.269133797943102	0.264236066221341	1
2011-07-22	0.216411980429594	0.345426104633186	0.93028296979905	0.0728196479333698	0.863829318024576	0.701757789672886	0.729418498773254	0.319387282502165	0.504508057098344	0.721122030176378	0.63204802067193	0.73068214653633	0.653293801175187	0.805512926386782	0.0291488857841916	0.644618014643811	0.619710996872413	0.716353008592806	0.666666666666667	0.66738671406131	0.717839844242126	0.162055900782966	0.559020242455018	0.507816467770165	0.745248304699911	0.218793835559593	0.563052271762576	0.489509144817264	0.727132220743837	0.099690945021514	0.614765871105332	0.92718035206663	0.914939553553101	0.937442125686023	0.771107676585996	0.785403066721548	0.901776412256879	0.202674556285215	0.609238338701325	0.649654619259736	0.272261197505127	0.264919577560585	0.272653558810355	0.267367832172599	1
2011-07-25	0.222651181314248	0.382347230548755	0.93518664423874	0.0309604505734025	0.884444695838027	0.784774850344052	0.731361072611154	0.330260316039232	0.533646849415478	0.727414159125366	0.631861305693626	0.74971556211009	0.658551738909036	0.813201026966858	0.0290061534720043	0.667808211280754	0.618914922016039	0.720221389320763	0.777777777777778	0.667387882145034	0.715051103522175	0.151301660185758	0.578082359291901	0.522691530441563	0.760499962900964	0.222959096763324	0.553699055201187	0.561493302932832	0.721017981264978	0.097295908545997	0.600022615611806	0.969039549426597	0.938709404719685	0.942312687064547	0.81154583908849	0.798799082361087	0.906421821263646	0.232782332624849	0.604477120119105	0.642745322181529	0.27582886525185	0.268158442428562	0.276253936059925	0.270618618234372	1
2011-07-26	0.218767580871003	0.419917542674717	0.939148972416625	0.0214830880283431	0.902195286967468	0.793424310466619	0.727833491585811	0.344585800261322	0.557929418506601	0.732322763584756	0.632937624303871	0.744624385782373	0.662308168812329	0.815571548568249	0.0291625634925076	0.668226338157211	0.626877743219108	0.722135566786445	0.888888888888889	0.667384872008777	0.721662737629326	0.141530306202434	0.599062759241697	0.539086735837796	0.775582237853455	0.226756978989855	0.517972849419446	0.467651761466145	0.728289833293605	0.097200988528121	0.602453165696343	0.978516911971657	0.957964236480782	0.95223085441895	0.836799433847763	0.811448793889343	0.909313548261602	0.179877227666837	0.603003224128847	0.640033066497243	0.279665195030772	0.271772873798201	0.279838148738183	0.273928401236835	0
2011-07-27	0.228614314911511	0.434441999920777	0.933667318775015	0.212654315877772	0.726850360750338	0.708462870851165	0.646222793375049	0.344636832802454	0.511679680415072	0.66143849164463	0.625421211116067	0.67677606542384	0.664373668488594	0.734256293330511	0.02812245541355	0.624113273896363	0.609923657180378	0.694346564970912	0.777777777777778	0.667558725834029	0.707557981545862	0.148695685354112	0.611282146165539	0.55482096470671	0.785334028844924	0.236893217665363	0.530827502549364	0.560008667072458	0.673896283889012	0.141254340388088	0.547974207004307	0.787345684122228	0.902051487459632	0.939471152061629	0.743315374063674	0.808903659963689	0.902622367634114	0.251416532916413	0.494990894451455	0.519685091954237	0.280487050592235	0.274289003117859	0.279618598144624	0.275203930815099	0
2011-07-28	0.230782686773502	0.436659116494853	0.928728492547227	0.226259223081295	0.715627535381212	0.693098328248142	0.628893317085167	0.331082484232769	0.479590587063681	0.642027370446917	0.624578480517268	0.658169500432391	0.669573487235724	0.661748843346093	0.0260954443157309	0.588753865583793	0.608198262667084	0.66466464287005	0.777777777777778	0.667593857305357	0.70597317387661	0.157771803199174	0.623221301565658	0.569966371353092	0.790176760951447	0.243599030843706	0.52351237656295	0.494184469046614	0.662334348149004	0.143598362735144	0.515026813257804	0.773740776918705	0.859883702899662	0.916355019828941	0.689763526644434	0.803951341976282	0.901523109078586	0.279008212254336	0.482338394408476	0.596667387295182	0.281141355283385	0.276767286214584	0.279286556945468	0.276145602313427	0
2011-07-29	0.239374480986626	0.427991625874255	0.923469156505841	0.249934327798104	0.695289586803204	0.672266935420675	0.611120231719613	0.308729450747909	0.471726187676853	0.620852785054252	0.625823098009522	0.699980749734582	0.670374724202614	0.642663209357104	0.0234092154194364	0.545185163721247	0.589585495193303	0.628091952810185	0.666666666666667	0.667504198548149	0.686525213244449	0.168679790921336	0.630819681440892	0.583710687430079	0.790517149428148	0.252197020697004	0.524517191336652	0.529247685449213	0.678354237302684	0.129997205388162	0.491579885565808	0.750065672201896	0.823257767401807	0.888254658078764	0.653327833853886	0.796687233878915	0.902660665724829	0.319935284269476	0.46747245318744	0.592204177230583	0.280734039018396	0.278627636939277	0.278742088125829	0.276738659699848	1
2011-08-01	0.23796427389449	0.425375885036886	0.92856430343368	0.162554494540473	0.736272192585977	0.639730243445018	0.638293142989351	0.293122512337658	0.477325934369955	0.638006182109689	0.632814995822364	0.728580189663799	0.676542493311687	0.702313325220807	0.0208256159624352	0.557440424121338	0.611217735450338	0.596993109544001	0.666666666666667	0.667474652427534	0.70749147565972	0.172939404575508	0.641664847238186	0.597029771117884	0.789242429493405	0.257126585677643	0.518823875882876	0.518174122551205	0.69991708052204	0.12994689276461	0.520493191537758	0.837445505459527	0.830264152831584	0.871948551324768	0.687535945900579	0.794641178042108	0.90421266754077	0.261853490300638	0.512779727798138	0.651274614619191	0.28048127126473	0.28029801883497	0.279890983307681	0.278053976807639	0
2011-08-02	0.245619667457986	0.414377264267077	0.923247141536906	0.324365042910673	0.623860787501131	0.543665667122488	0.576108886744758	0.278016859279526	0.433823397916973	0.589102462204211	0.627042262365734	0.700869309772661	0.673096037272014	0.635974714874515	0.0199452226890659	0.486137511588064	0.561483744458183	0.548544306528839	0.555555555555556	0.667654642945173	0.657376088881105	0.186712780319784	0.647026716161077	0.608833845209321	0.783880942151233	0.265026361093848	0.518339278033061	0.557827340962398	0.658972489131645	0.152847647459887	0.485792721856664	0.675634957089327	0.776744507561092	0.842535126395659	0.619660871772369	0.783868666629101	0.897958783082025	0.293291775338817	0.463017300955662	0.541748742086597	0.278386894408955	0.281175790904132	0.27876647920028	0.278092210313935	1
2011-08-03	0.257975436297721	0.38840786527478	0.929337247023231	0.261401190976266	0.650969682150847	0.586378511531532	0.592673742194724	0.261529943822595	0.464124493101247	0.596717193639892	0.623638256136497	0.693143935709014	0.666627025987304	0.566424534752205	0.0193233994945151	0.498774485464486	0.544164563002523	0.541767695864167	0.555555555555556	0.667614504294101	0.6388713591009	0.195443230085115	0.652127290527935	0.619369927962698	0.7767677608673	0.273020449885575	0.535727660532494	0.566617896402842	0.671976190653827	0.151570610756386	0.447698686397853	0.738598809023734	0.763707905451271	0.818409449314814	0.624435240376301	0.776873521291652	0.904667182428544	0.273205264852525	0.50664804498805	0.631245974713198	0.278384011512565	0.281588472166213	0.278899339058169	0.278608041288187	0
2011-08-04	0.273277946704336	0.356980079195568	0.922092323820227	0.675818409796211	0.476435122171151	0.473604572873359	0.47442499735176	0.24692227000895	0.408392130343813	0.517346916857571	0.626922279568115	0.638394355495244	0.653278575508864	0.492227851730582	0.0176757507727325	0.417698542835712	0.483613907814029	0.518946752676802	0.444444444444444	0.668713354849932	0.578833719101825	0.219905780896032	0.652031822685905	0.627778339704416	0.763778396329899	0.28612013455834	0.574045062709297	0.578529432289954	0.596463822702941	0.197231745427957	0.336334885476896	0.324181590203789	0.605983452571066	0.747679652612881	0.404363749047149	0.755834007258334	0.895041468369569	0.333460910589241	0.404504565743202	0.482142929933896	0.276296850920914	0.280866454440083	0.275322730067702	0.277017731781266	0
2011-08-05	0.296925725341416	0.342543760811275	0.912077300039112	0.715534068760307	0.441117666360654	0.437498293773575	0.437768349311301	0.232760875765157	0.394625023281218	0.495689543149218	0.617463079732161	0.590517936426968	0.631015556954182	0.405820209332954	0.0155076435253885	0.384854891809423	0.437827906114309	0.501663177196617	0.333333333333333	0.479124333597747	0.533055969102186	0.243905582892767	0.650095052459568	0.634090106423607	0.746371425660675	0.305973527742772	0.658150967754004	0.612062384590916	0.552380102918954	0.186952946806626	0.189947563488642	0.284465931239693	0.48655120835141	0.659147355189378	0.281658402738076	0.734413387167164	0.895787438557034	0.434902564879634	0.397900325589491	0.572180401698476	0.273861590741218	0.279434076920319	0.272034096111789	0.275220106862345	0
2011-08-08	0.323838713125205	0.339294256815789	0.902567414436765	0.995894310523224	0.289063808393601	0.367331751058353	0.273655163359972	0.228822946838258	0.30826210266679	0.396330229379605	0.620692230164794	0.523339727730087	0.601252709786268	0.316447245521091	0.0126102958473747	0.291994995451329	0.368817358996857	0.448773248432113	0.222222222222222	0.666094671920707	0.460953586401438	0.285483264695635	0.638686113813708	0.63669509783	0.72084834917914	0.325443758260612	0.699816811935329	0.524299766062414	0.471615979906289	0.248305405036381	0.0930903268048117	0.00410568947677596	0.306106112466015	0.537607902657402	0.0809161009461317	0.697580966958087	0.883442653543442	0.410254663839542	0.278844439266389	0.43121450557561	0.267572678590598	0.276137716938895	0.264920233705932	0.271047226838783	1
2011-08-09	0.326356468551955	0.326536463090825	0.911568064698286	0.590787927992762	0.453498702180659	0.45089409815359	0.429207355269538	0.211123168916176	0.364237867704327	0.492938358063159	0.631281280626425	0.703154521902961	0.577624541262329	0.321705046808717	0.0115601194507911	0.407479883952972	0.417888105405316	0.447397363696763	0.222222222222222	0.665060237184503	0.513685104390517	0.29436212742617	0.633181826686246	0.637599770003755	0.697809531555897	0.342965053023422	0.713762327334986	0.482729606316124	0.513060876918863	0.304327639667671	0.257059268837522	0.409212072007238	0.331494388805115	0.465377751646614	0.221384198414238	0.686984076863522	0.894701525407835	0.521787509397392	0.48183157224055	0.777288015058642	0.265420514099244	0.273997879899945	0.265193140670545	0.270386781714472	0
2011-08-10	0.338609923953836	0.312407689000959	0.904262871310258	0.789929817836178	0.387781429351585	0.397569685578677	0.330248344337628	0.199876984297847	0.340631726919202	0.441423522035139	0.632843242069941	0.798119788725089	0.548414914498629	0.391769014558516	0.0105109825758786	0.370838689553737	0.366395609486667	0.409189695865376	0.222222222222222	0.665880348795598	0.461843190471027	0.312990568393887	0.623754238906663	0.636303600072288	0.674299094611719	0.356488875753463	0.688137753389568	0.562468723685339	0.476271286290193	0.314340189146552	0.297632585063108	0.210070182163822	0.276804180587637	0.398276071385014	0.198563354724425	0.668358424924502	0.886874564990891	0.451756252259739	0.429955296273044	0.517265158313888	0.261249083707588	0.271894438662531	0.262886630973003	0.268480145694977	1
2011-08-11	0.345626535131155	0.299288113060371	0.910431637652202	0.596769293917043	0.454132524893498	0.453561638834373	0.408697895476337	0.185248122039061	0.379408963849922	0.486300164849245	0.629241601470696	0.697749055923764	0.520302879014257	0.402479316483801	0.00974348558634072	0.414000588731505	0.383316300124288	0.422535485374772	0.333333333333333	0.665583817458977	0.480637235613702	0.315724249265331	0.616622186173378	0.633738586281649	0.654622549424086	0.365137015752855	0.643696252712765	0.53027804435661	0.491714218558036	0.324422429045334	0.343945470341715	0.403230706082957	0.30980873914723	0.364976544228601	0.305041402889316	0.662533585156724	0.892412929645408	0.412270157243862	0.541316152020306	0.685522896751216	0.260718998465192	0.270575605495037	0.263762663249164	0.268245405667038	1
2011-08-12	0.335846644915408	0.278626324055632	0.914829568650546	0.533284994192673	0.4748035212441	0.417582633684104	0.429390669649017	0.171852503997763	0.402567785739887	0.499379352248327	0.632822891258315	0.769635303428543	0.502848372503234	0.397519957933478	0.00900250660877429	0.403768699851378	0.430130538192667	0.448344642316363	0.444444444444444	0.665739223627729	0.525969597388509	0.314120518836724	0.610306716620296	0.630333454420018	0.639202705511339	0.36637296415954	0.571721642636624	0.429470185033947	0.486031453320503	0.322322736376735	0.395255187168311	0.466715005807327	0.354642103859636	0.358310053838749	0.401229483388282	0.66056977360715	0.892532037993774	0.31122965299241	0.569873443890446	0.629409285255507	0.261205752286027	0.269593750913511	0.265139975209442	0.26848889845645	1
2011-08-15	0.339577240588396	0.249832166755882	0.918658552826957	0.399845409775872	0.514286006104564	0.400148264116493	0.488386061252988	0.165773787965511	0.435690265640672	0.528147778496903	0.632351647688861	0.739901888768913	0.48919435745378	0.395180272959837	0.00903122094028957	0.457177684015384	0.453986098652606	0.541793719297674	0.444444444444444	0.665618833417585	0.549737128958399	0.305839947865507	0.608645119067683	0.627253343373382	0.628986810376096	0.363259845245646	0.499440672284082	0.445452922456266	0.492088115028171	0.325124994514813	0.444625451717822	0.600154590224128	0.432518771004588	0.380847271042845	0.525450003185941	0.664551614234907	0.895320257981928	0.288379316815186	0.610172997269168	0.654195235529156	0.26556784296276	0.268622823370311	0.267606258479982	0.269538084121137	0
2011-08-16	0.333072024765322	0.226522494190907	0.91451192219452	0.41131819687232	0.49238018414342	0.385782158920104	0.455769334002553	0.164040773733057	0.458598940565421	0.513105037856119	0.627502777736907	0.718607169111945	0.473512800709696	0.402245453612377	0.00886709371433677	0.432234864923672	0.44871058387312	0.56832584997292	0.444444444444444	0.664815549157291	0.544383856356305	0.303279474622981	0.60619043741584	0.624263326757617	0.621529409352014	0.354362898319896	0.445982940978925	0.393001652824845	0.516758867435779	0.315758478046284	0.436828950568157	0.58868180312768	0.480310687007408	0.412430311542755	0.579380787529924	0.664444680044312	0.896476671733292	0.248132224068486	0.546284167752275	0.57924691017478	0.266502370596904	0.268009254766108	0.268543930969899	0.27000859889382	0
2011-08-17	0.328285202151878	0.202381288843966	0.910836604874557	0.412170258113101	0.49206729075854	0.43858418430839	0.459861387542261	0.163121003501513	0.45873302071343	0.514460048310447	0.630201147393437	0.698823474068779	0.453309934472478	0.451511077914414	0.0094704898049719	0.49054059728833	0.427775009508881	0.624269446479942	0.333333333333333	0.664684549776267	0.524165726711958	0.301737834435274	0.60244360204288	0.621068535311485	0.616052704428802	0.340498598861566	0.390692158126216	0.389493702379167	0.519146395101211	0.315805579262482	0.456288791374723	0.587829741886899	0.511865544712815	0.444418327534373	0.601000008731522	0.663829277492778	0.89524489728437	0.196314834267902	0.536879236672217	0.602337875423762	0.268921729730706	0.267126384056521	0.269159386615021	0.270388262101158	0
2011-08-18	0.341437941837969	0.206272365557927	0.903757733131489	0.718248095651431	0.388453015998272	0.422957379201795	0.327013972459118	0.172949759416844	0.446905578182053	0.449746339749688	0.618695249938018	0.627051918369446	0.434562373444579	0.444119391446283	0.0100483986954762	0.448013673270942	0.406043204840318	0.619627137182483	0.333333333333333	0.665841675834028	0.500712986272916	0.317047673548571	0.594126334881702	0.616730686210628	0.60782118792632	0.349520649019976	0.425675474431718	0.516424076636094	0.474891228623446	0.335723796624099	0.331539579303607	0.281751904348569	0.422829913743008	0.434895936330488	0.438572673581408	0.64951623978155	0.893639435908707	0.173378414714633	0.41352610908598	0.48498282642217	0.267816759306707	0.266302477637227	0.266099854814713	0.268793796875785	0
2011-08-19	0.346816707473667	0.215775099543971	0.897306960987545	0.930070719547958	0.328382600825492	0.340307316284414	0.257126405343674	0.186830094911885	0.38307205108394	0.409582277113282	0.625029324838464	0.575460013748818	0.409343042038952	0.380147110227289	0.0104834184288982	0.490313533945449	0.360655123982823	0.589976584940768	0.333333333333333	0.66631797458107	0.453906214145733	0.340031021826326	0.580548986508392	0.610351392369155	0.595456067748705	0.356717156108397	0.437266007211957	0.503315800906918	0.419025677930562	0.335625239955186	0.288394810924229	0.0699292804520416	0.287296834737447	0.381590199220562	0.240076956895224	0.628580375353985	0.885091097914046	0.118649944813743	0.353333463487703	0.517953061844368	0.264789292881301	0.26502220965155	0.261644028815265	0.266162663844189	1
2011-08-22	0.347307683099097	0.225884004486641	0.901757596388705	0.91100694251342	0.331735100127877	0.274979897107994	0.284602629274543	0.194556351984845	0.333313778304109	0.421235729524442	0.627123323653797	0.658411245447332	0.397334868999272	0.385720588063592	0.0105478862688656	0.408002856432831	0.412446675847941	0.518114146470959	0.444444444444444	0.666177926763438	0.505148598839764	0.356545679879667	0.565105650696875	0.601939145626155	0.581448962165715	0.355204021235316	0.400356214815315	0.41468182403991	0.445925147426881	0.333771836438244	0.296211310763821	0.0889930574865796	0.203797194802286	0.317123333413229	0.157518304066536	0.61237720198078	0.880796417147742	0.104558201438345	0.384485399504525	0.606171970188106	0.260893730634925	0.265257293860885	0.2587723480734	0.264064202756572	1
2011-08-23	0.358211030708867	0.218988480272355	0.907218554706064	0.481751479658406	0.457923369023138	0.308454439711885	0.45549129885882	0.179544137548591	0.373992033427658	0.512613507202482	0.634235603235005	0.785088832572569	0.397385879792597	0.451134678782195	0.0111205976296618	0.519164742128691	0.481822370198307	0.501010270317368	0.444444444444444	0.665356429642815	0.577027659638607	0.348255083524989	0.555698634428296	0.593193848110049	0.572300426628406	0.360209394576329	0.39395555931944	0.42942938010049	0.495746687929869	0.372951470881002	0.394592292456952	0.518248520341594	0.302500306100893	0.308342602222454	0.361874727608593	0.615936669024959	0.888037774956529	0.10909136317062	0.544143793929951	0.746159247111052	0.259899978428581	0.265227450531255	0.260995680324423	0.264619114254427	1
2011-08-24	0.346734885362555	0.202108981062175	0.912425372579273	0.277319718536986	0.474623623596603	0.372855902587279	0.491186664820915	0.166443073191492	0.413695844155656	0.529351149730495	0.636189214143187	0.794375618214244	0.413813795571578	0.523716098589202	0.0116551655009029	0.488295498208281	0.558098891270092	0.474137119764252	0.555555555555556	0.640450752929952	0.656537120234674	0.338682316366282	0.544448422405647	0.583787196098347	0.567449549845322	0.359291452522396	0.382707474296656	0.382030389972039	0.554434954114671	0.353242419675793	0.497600835173702	0.722680281463014	0.441820458068872	0.350758346195907	0.581468883541492	0.621217332676031	0.890361447614219	0.101415876148116	0.572374092616704	0.62366226435466	0.259284662768108	0.266136510099629	0.263100007153394	0.26541469709107	0
2011-08-25	0.326268360142844	0.195314907342752	0.905180961521526	0.353366779678039	0.4566966635949	0.427759815167415	0.475577484950903	0.157086928110061	0.478095537891712	0.521660871233165	0.625738950143926	0.705151581831612	0.417901967730382	0.541465760145105	0.0122844841722108	0.465367485735211	0.480926886378353	0.493907258581423	0.444444444444444	0.831558351077125	0.576117444263312	0.3341417611478	0.533084368963959	0.573827069398735	0.564847244705349	0.366992026893185	0.420450638319376	0.383417508272026	0.558805947720129	0.352350412348371	0.447816154844553	0.646633220321961	0.5073523933014	0.401740034696671	0.645776139225656	0.623041868540129	0.896818127207818	0.11153803307937	0.561107355278969	0.582637135950659	0.260392528495327	0.266137969046232	0.263909747475997	0.265739965134792	1
2011-08-26	0.315045556901851	0.174674643207056	0.910514232714568	0.0485450791771635	0.521809790597989	0.468126026783625	0.595477095518715	0.148917857216451	0.54964377851482	0.572164367946912	0.636187462993637	0.736473279192524	0.433146529327025	0.635272998376646	0.0131660719205298	0.479021106297335	0.547880235334723	0.555439065321658	0.444444444444444	0.667964304335164	0.64423283660613	0.319307326789442	0.523917382779982	0.563894895559316	0.566691421831113	0.367238967767596	0.405787457309567	0.328903016560769	0.663011419510387	0.306362429009753	0.535253888167089	0.951454920822837	0.660660818880698	0.488843839849492	0.836627833827069	0.633698981785022	0.903683816492756	0.161505318065451	0.619612918046446	0.682134275730329	0.264371866176861	0.266617618060258	0.266827092043908	0.267311459713495	1
2011-08-29	0.289778061318298	0.162586615230777	0.913883659640088	0.0464516318247366	0.560106464015195	0.46117342166325	0.683915409663976	0.138869232435386	0.573776775759079	0.605539068713314	0.634935566160053	0.767953848376433	0.445712690673555	0.608928358249854	0.0142200566894986	0.515711012530945	0.53586967907175	0.629707013347991	0.444444444444444	0.668536435870222	0.63082972800793	0.301301174512907	0.515864449788615	0.554223775457196	0.573024352143469	0.361475122062012	0.347685161471148	0.242328947102301	0.608690871054559	0.254302597688683	0.632323816617246	0.953548368175263	0.763619284827573	0.582584554334357	0.920523501876362	0.647819828320888	0.904248221675058	0.142170101926537	0.624002951804331	0.653081496808888	0.269214950521118	0.267095075528472	0.270312803203651	0.269443205940698	1
2011-08-30	0.276440412825629	0.147985232081179	0.917358285857274	0.0555967872905278	0.560227071723284	0.518055249682669	0.690567082668423	0.134810191977716	0.583403394250214	0.605359681081469	0.628243874987764	0.725941005422101	0.45765844946003	0.537541816757377	0.0154971803317211	0.515951300873875	0.525020681701955	0.657398278495705	0.555555555555556	0.667873307127093	0.619842588828976	0.288482146105394	0.506750677828552	0.544534208308473	0.581713782630405	0.355321115995033	0.302239956784199	0.293618662656909	0.644249806095897	0.233358095184073	0.596543163063614	0.944403212709472	0.828969466651369	0.667719918637125	0.941568223138438	0.658520526098677	0.905835312692485	0.13568957619203	0.576286418600716	0.602815590687192	0.271582325032614	0.267787245378197	0.272641429020074	0.271190007454366	0
2011-08-31	0.27539708783164	0.129262578130027	0.913013478289685	0.212923297179794	0.515157886892642	0.451671303580245	0.630028898975043	0.131497228450154	0.558451195094751	0.581770734130253	0.627048135054459	0.690781428049796	0.464712102339463	0.461026755674674	0.016129351542448	0.555191723220622	0.48660008882814	0.672583773195644	0.555555555555556	0.668834702629445	0.581756418807699	0.285333565405165	0.500282838169724	0.535396787705781	0.589776048197866	0.349491880719116	0.28806385283838	0.377706833501455	0.591826712645471	0.227286100484853	0.547419856726648	0.787076702820206	0.815958242752841	0.719968893707689	0.850444435210504	0.66166484040929	0.903410897498385	0.167492622911439	0.518224414056141	0.562010003657074	0.272831744807419	0.26810677116624	0.272949629925704	0.271936076914609	0
2011-09-01	0.277485298654429	0.113273253045855	0.910155731034627	0.312965975872149	0.482913933181567	0.498527094598734	0.580457808324278	0.132064961639727	0.514586826562645	0.562005143294442	0.625890514747313	0.682038393575884	0.46886538087004	0.405234321137611	0.0168295686340485	0.583518633551514	0.483713731305473	0.671719345163304	0.555555555555556	0.671875792477775	0.578916710952721	0.287807453496503	0.493271389400303	0.52658461337853	0.595805379660434	0.334838863304231	0.237271926415378	0.360446480150326	0.567800864297912	0.229100207302726	0.50563623958408	0.687034024127851	0.771306584943628	0.739331304466702	0.738662639080848	0.660154354744172	0.899959761002317	0.137576100133036	0.480453817827783	0.572373571981052	0.273887596587095	0.269197070891263	0.272238809170514	0.272043413259476	0
2011-09-02	0.279862321195633	0.112690560331813	0.906506370167464	0.496731667384146	0.426707445837642	0.483676215335953	0.490154362022792	0.131985782547759	0.481410933656544	0.527304464592031	0.621757834577124	0.679595311381369	0.470143780698976	0.348202275702747	0.0176694667692922	0.552347350222818	0.460687926090925	0.627339958616705	0.555555555555556	0.664945813912532	0.555737065126396	0.297921906244131	0.484861268130228	0.517732963517145	0.59813791216128	0.313577767181762	0.218392677512836	0.44249379039716	0.52233098626142	0.229668584187061	0.423463280162025	0.503268332615854	0.675452700395734	0.719029556474849	0.576422573581478	0.652091199900081	0.898596368436655	0.113094269945667	0.422852017999675	0.54623296847148	0.272511074467147	0.270508632627969	0.270081823967629	0.271207132282975	1
2011-09-06	0.293240938022198	0.121095151176169	0.910744022979678	0.346930279545436	0.471245010448655	0.634071063694575	0.557382606284945	0.118876808593169	0.500938669186328	0.548862140788717	0.625410757122851	0.707572539850161	0.483302734600384	0.411619430653014	0.0186237206872238	0.50296998823374	0.527309626847457	0.574387356161271	0.555555555555556	0.636072309879182	0.623390918886175	0.299510685648035	0.476898794180867	0.508945643898067	0.599671107854964	0.295968690225247	0.2213134957042	0.457436095089041	0.551728339920897	0.234194054011117	0.430450386252065	0.653069720454564	0.665421926018807	0.702019744970395	0.578144810981018	0.650683824025538	0.90376167979437	0.152281601481027	0.47463567257318	0.648734818087412	0.271033445696889	0.272204489538687	0.270015860448315	0.271276207889833	1
2011-09-07	0.291003173449244	0.118605982661481	0.91365873475492	0.236618811435423	0.502662297293796	0.545584309423614	0.603987726469975	0.118469279313803	0.506274894280408	0.567055563168696	0.634964471186328	0.737720921141932	0.507167099968195	0.40490924871496	0.019706681538944	0.509211053203385	0.574456316263413	0.546995437885452	0.555555555555556	0.673120589203503	0.672223501928068	0.296412083256204	0.473682462372036	0.50122667308202	0.601767836529112	0.275641864111254	0.186028322573591	0.403120597976247	0.566056918682948	0.236597164043642	0.521463809920259	0.763381188564576	0.698405130162178	0.702107398426322	0.642637422798217	0.653114284901037	0.904042146031046	0.0804880171576193	0.517294797523246	0.636149325425471	0.270158139251263	0.27295634434263	0.270982224342221	0.271887447028506	1
2011-09-08	0.267928965806318	0.110221048166193	0.91711869499429	0.231089289333986	0.504271155288279	0.6048060137972	0.594768561168087	0.117786490855142	0.490052798486958	0.562958732837798	0.630318263968529	0.719012540121745	0.528268429303534	0.483592960089158	0.0202437293547881	0.5201132528521	0.573792760783819	0.535570477358491	0.555555555555556	0.668082129834451	0.671461800277105	0.294319646402598	0.469528093354686	0.494161402161135	0.60405495951994	0.262798917085625	0.175017078115605	0.2994535321408	0.615414822649696	0.199562115689852	0.520974142203794	0.768910710666014	0.722382468529891	0.710473144032332	0.679091055032421	0.654842420294762	0.902110281998511	0.0813757366415922	0.527099917933575	0.604328318193901	0.270058474049149	0.273535706986069	0.271677111672537	0.272415358058722	0
2011-09-09	0.267888054750762	0.113095632703694	0.912422811852987	0.406429022826523	0.443790660237093	0.520850531781518	0.496120114552616	0.116107192172154	0.455863336109113	0.52927207962179	0.623865234658192	0.684222646875387	0.535921404746747	0.494991356005469	0.0195818196007455	0.454540736067246	0.494761961130292	0.522222694238659	0.555555555555556	0.667888856075924	0.590122583850996	0.300585858930761	0.468627752787326	0.48831628297042	0.604299255059612	0.257879537638534	0.206058507157841	0.384776011128631	0.628324318697595	0.186050260663226	0.451813067530651	0.593570977173477	0.67531140463509	0.69974182880779	0.600376589108455	0.649683640913238	0.898656982702533	0.102080900498873	0.482221743754033	0.549282676892902	0.269545701975605	0.273809365470772	0.270534438301223	0.2719655552163	1
2011-09-12	0.266231106882187	0.120795093231167	0.91631239212504	0.34300184323599	0.465075983043275	0.559591942268445	0.530425884433936	0.116094231416118	0.469800824356631	0.540636227532406	0.623796043091567	0.691295980091891	0.537737772184681	0.497830236680295	0.0189777308829718	0.439838507287773	0.494363962564092	0.541168263634623	0.555555555555556	0.667840052119564	0.589635659955263	0.302854289999381	0.469930496951179	0.483919307048051	0.603919544245402	0.256181663622632	0.20770497896109	0.423923652848766	0.635225731014231	0.185852821718476	0.398034563446008	0.65699815676401	0.666740479410435	0.689618092538555	0.596307336853633	0.647589589880482	0.902754561900013	0.0938059336471841	0.504071757885965	0.622483695015524	0.270396458686167	0.273544431679991	0.270365836059089	0.271923217719256	1
2011-09-13	0.244383443328751	0.117471935590664	0.919975231724195	0.286866301908461	0.504721495311925	0.554826029164456	0.594462076735904	0.116940783361954	0.489475764154355	0.56333180015246	0.633986407815658	0.730029452871541	0.541847019253096	0.484201955658912	0.0184414906473108	0.457735760235404	0.518052882822377	0.559619966446794	0.555555555555556	0.668416389133227	0.613344279164302	0.299661773893052	0.479754272580165	0.48250651920203	0.604454964295406	0.255626746424689	0.20350980406573	0.367239605508704	0.589143460806499	0.128076646990462	0.482105795425809	0.713133698091539	0.681214082653925	0.687883532837385	0.626835227916657	0.649959783372218	0.905031025047536	0.116531489329263	0.528107731837858	0.640022390438869	0.271101335876664	0.273155041275634	0.271381928866077	0.272508173043273	1
2011-09-14	0.241816629002339	0.103459343343208	0.924420955186755	0.125071101933514	0.542333999399713	0.548944462774555	0.64702153756657	0.123033766098278	0.497990691325318	0.584095766758325	0.632642980324988	0.739019237090107	0.534128910733109	0.478945907691092	0.0188117375416328	0.495752476538985	0.500866557547388	0.573502461454319	0.555555555555556	0.668243139712221	0.595758772575895	0.292530085081111	0.483283322688359	0.482132405500277	0.606773010429762	0.256625706234017	0.22622061461054	0.418937096611722	0.5959120274751	0.130713161988679	0.559112150508987	0.874928898066486	0.749048200758748	0.71022931148133	0.731626355608836	0.655776109960707	0.905609616880948	0.129797897627454	0.553324048483343	0.63956963871026	0.271876973736496	0.273104818161323	0.273187792011685	0.273606353474872	1
2011-09-15	0.227611471385516	0.0883851419989945	0.927894720068736	0.0271208192059282	0.570589151412672	0.589103986161243	0.67826124105557	0.131648814017594	0.517089501408912	0.598871705067282	0.63013488167156	0.735476930030887	0.530066859881576	0.57582771611491	0.0200577194924922	0.525247412154002	0.491809253241265	0.584935213812959	0.666666666666667	0.667891479971671	0.586726066485282	0.283796808862493	0.491344637985819	0.483560291520318	0.610978391167062	0.255952527993889	0.215324624199484	0.295355192564028	0.616416934455051	0.128849209170249	0.600103800496982	0.972879180794072	0.829495983913197	0.752998843236321	0.835465375723173	0.663257118026729	0.908514735639507	0.0920468434037299	0.570737773598111	0.631218387314539	0.273150939862684	0.273696549739282	0.275274258281955	0.274989429258736	1
2011-09-16	0.21484477340287	0.0827090304658457	0.933702191211154	0	0.624289821993211	0.682501447380235	0.739330545338164	0.140678301764417	0.572228031478361	0.626933318616155	0.631274778256774	0.753863074358386	0.525494567571788	0.581776635736859	0.0221545860503264	0.584257881086921	0.516759400436223	0.616376533766785	0.777777777777778	0.667968447947424	0.610625874859691	0.269924647932671	0.497937133014311	0.486115075254318	0.618111463534334	0.251706093530433	0.280478126979697	0.471030288210337	0.607161316566249	0.118809260371247	0.66115682421563	1	0.892881071844294	0.803472582679679	0.896205823152279	0.675441962800573	0.916252784307336	0.0950446358147978	0.609316167864204	0.660663606790213	0.276475963829919	0.275113646683138	0.278483354833988	0.277119267400883	1
2011-09-19	0.236880166721215	0.0949827525706673	0.940551808113698	0.0368259047213959	0.690780118576616	0.838120455651412	0.830188161183242	0.147329505707268	0.635962636723777	0.666659236573413	0.635782319078295	0.804679750817644	0.532053126663729	0.609218085459813	0.0240182938173912	0.604124832155863	0.570806191149835	0.645791928695137	0.888888888888889	0.667828698648037	0.661982004476267	0.248944406769765	0.506716430312057	0.490039910445066	0.629609614813871	0.253038221364589	0.359855227966247	0.604744508702751	0.621479461239264	0.133570841893352	0.702131567955063	0.963174095278604	0.921894406220384	0.847173848934939	0.898131966995237	0.694283553045328	0.923759623075348	0.203540197923968	0.651267341409704	0.686314356499901	0.281053264526793	0.277848851015441	0.283306492270128	0.28033535836362	1
2011-09-20	0.249235935560948	0.117710528975584	0.947001462849809	0.177920695605585	0.700664128617863	0.820559739555451	0.789749854016566	0.163352498313997	0.60862832164825	0.660697318154685	0.640216148566184	0.779040179782714	0.54305644218048	0.688207960319193	0.0236318205151142	0.593507637322266	0.589452561288657	0.672300407624032	0.888888888888889	0.667790371509879	0.680057353931028	0.233140759573337	0.513239768386739	0.494577436293587	0.643323788284747	0.259714877481249	0.4075734291846	0.585272141121265	0.627101160846728	0.133009836169779	0.708151208229655	0.822079304394415	0.890495894175118	0.865429539088574	0.813698865359915	0.70961836248975	0.918494403066037	0.180794752069425	0.619517333932226	0.616123843529103	0.285217471886961	0.280302388286268	0.286960790558351	0.283207667088589	0
2011-09-21	0.247947172872794	0.138814892780149	0.941963350280142	0.200124120745211	0.684134284756286	0.690373382459959	0.729439665925784	0.179903461255146	0.537890829699986	0.64456747159646	0.628741673432326	0.712772214069502	0.560578824329625	0.67637109814209	0.022821895992444	0.58751870666801	0.608264975745327	0.691043877368776	0.777777777777778	0.66765731207851	0.699368388551917	0.224560421405279	0.519817979678395	0.499616871528562	0.656851448371541	0.258302587165508	0.406467932631102	0.484496524258824	0.640044805309511	0.123954187994847	0.6324389153894	0.799875879254789	0.86157872145665	0.86758120921909	0.754356992752	0.719278223862034	0.911977478791738	0.229753486012913	0.572240407245035	0.592974139957662	0.288516495647786	0.282355614934575	0.289081113669141	0.285384307600257	0
2011-09-22	0.26380346460651	0.130398971329951	0.933911355990003	0.375041724317475	0.564437255224565	0.639896581206375	0.616253616262406	0.180619265944787	0.484656393452982	0.588887697459718	0.618704993873016	0.636904115665749	0.569210020963451	0.621051778860855	0.0224289920276001	0.574924132189761	0.55514659790893	0.690516046458599	0.666666666666667	0.6679114833645	0.6483576233479	0.230508114285354	0.52235785517714	0.504192600701318	0.666125073558237	0.267805378956941	0.48013051938593	0.674664859396611	0.620537064213673	0.146386420303661	0.519622880388053	0.624958275682525	0.779396457209932	0.840542372885249	0.6273585813002	0.716522889959713	0.909622409298326	0.280751625483917	0.475687178800573	0.525266398561963	0.28979623207833	0.283642428571995	0.288006207204063	0.285798919329522	1
2011-09-23	0.260556613168313	0.122584187126196	0.938453129967591	0.333007435862345	0.582467160086683	0.600345073170507	0.627754336210523	0.174447838273496	0.471992170358571	0.593172224508372	0.628663419568445	0.6511947909849	0.575813665729311	0.678788265799238	0.021849504084087	0.57437765380638	0.549472980931278	0.668385551486635	0.777777777777778	0.667618004436335	0.64227939137574	0.233932433303031	0.530499077173741	0.509597481429525	0.67260785029447	0.258778663668662	0.449371383335034	0.499643310974165	0.652040102941932	0.128665487191733	0.510285803986654	0.666992564137655	0.739724719267446	0.808771610941857	0.589568257582929	0.715442075410129	0.911387809551803	0.22382471306498	0.480370103392357	0.621437338806369	0.290345097879329	0.285594486054368	0.287887601276014	0.286466475627996	0
2011-09-26	0.25857853427702	0.10818216343725	0.931694837876112	0.392200924086416	0.569607503257513	0.607500416442352	0.608462092630244	0.171038024429517	0.519431427051607	0.58302281870761	0.623651282309361	0.711561851542608	0.577152813080196	0.594713699860302	0.0213352316130162	0.550586030189841	0.545026677329359	0.622931191270723	0.666666666666667	0.667725529881224	0.63806044652522	0.23912677698198	0.541068767651814	0.516185994878147	0.676312565805379	0.263538184665567	0.477684724728574	0.55276212888148	0.628877318242144	0.12715434812648	0.467215629232582	0.607799075913584	0.69198963681242	0.771052564787613	0.54345732498135	0.712504939149732	0.919242278281463	0.244406193400115	0.468252461900966	0.594116621688755	0.289123132165959	0.287285243187967	0.287536031596129	0.286863043579887	0
2011-09-27	0.270369538667634	0.0968011953444921	0.926436223493951	0.466005936723105	0.525080173615845	0.548529068674202	0.562157553464436	0.174473148710983	0.494376772015543	0.562266815990698	0.635641674214019	0.686102564039982	0.578442599413456	0.608736296336832	0.020203564305687	0.516673093999345	0.554151161057574	0.573843762030796	0.555555555555556	0.668057502751889	0.647825222855234	0.248392430544335	0.549341021991976	0.523229177359743	0.676633612811581	0.269848006070178	0.462558635936582	0.579179834505858	0.602209603043848	0.131443417490891	0.486390392426438	0.533994063276895	0.633624371508184	0.725685008890789	0.486134189328578	0.70572370381277	0.913738331122703	0.279326014078387	0.453751533928489	0.572917717372385	0.287073528179939	0.288350794245359	0.286358859888286	0.286669872291723	0
2011-09-28	0.272272010147889	0.0840005876937641	0.922864196560605	0.508478506132029	0.499892756547857	0.495980268029882	0.535123377609374	0.175478660205167	0.451777213316735	0.549944698459283	0.62550441315388	0.68578283819487	0.577274942261926	0.560713874599491	0.0184206559952056	0.493792000580957	0.538524082346064	0.5299042565173	0.444444444444444	0.668280251899428	0.632508934476709	0.25883247443237	0.550307405448091	0.52907077581711	0.673907565161932	0.270173321126392	0.408532754792637	0.459612870729429	0.594256876626	0.133652548655372	0.452776625785836	0.491521493867971	0.579440141117254	0.676667029009706	0.441586210658947	0.69747792289842	0.909637136992717	0.270881292554802	0.457235185075895	0.585411561093808	0.284888143834369	0.288911958419683	0.285031530298297	0.28621393908931	0
2011-09-29	0.282541257875916	0.0807667229967395	0.917451030707461	0.630042330622235	0.431850301914354	0.487768557599694	0.469380759823095	0.173893938380267	0.411421903663475	0.518159759387297	0.621098203950617	0.67434287853601	0.575946596024759	0.554094685167152	0.0154449277683406	0.441225065502902	0.501629832886459	0.506277589874013	0.333333333333333	0.668256246047247	0.596451582466216	0.274360401560323	0.548100084603037	0.533271125090291	0.667372889074917	0.273741601211192	0.410834220668597	0.483232326241451	0.595692845990516	0.132181760140442	0.381648166176266	0.369957669377765	0.499600343349166	0.616326675456467	0.361011876983396	0.684493326252237	0.906355388018714	0.37929881309331	0.434423634799353	0.552747787770142	0.28326319071217	0.288738003334148	0.28259377659215	0.284988307504951	0
2011-09-30	0.281420306409344	0.0834759823089552	0.912897919696229	0.964372630989833	0.348455746188575	0.46583991222765	0.378649149660427	0.173346318435029	0.358006849170362	0.474407033391739	0.621894635848946	0.647079506042489	0.568641061563424	0.548823891435925	0.0121936786807798	0.368081551726177	0.455412618575372	0.474054075041268	0.222222222222222	0.678783712151231	0.550980599986304	0.296531068536356	0.543729361641418	0.535694955329884	0.656067492389542	0.279404058094285	0.390602991969099	0.486522669224438	0.556845602389073	0.15188897447371	0.268754702319669	0.0356273690101675	0.326141412740996	0.516002314341095	0.147300993507165	0.665421711489494	0.900509007512007	0.372136815067911	0.387512899305941	0.529509922518784	0.279943949456122	0.287342007975592	0.278738149107667	0.282760894164943	0
2011-10-03	0.288600590448058	0.0954717164835054	0.907334997914056	0.96868608956344	0.296560337651931	0.432271853570886	0.309426116660243	0.170478062613724	0.308701691063941	0.442547175627782	0.623370960193361	0.6450618545102	0.555397927560251	0.489826857815087	0.0108319371957777	0.337632818515179	0.420973332671125	0.44871943538841	0.111111111111111	0.665320427165223	0.516762729470854	0.320851261694653	0.533997779877216	0.535548979624724	0.640482597770759	0.285795286015114	0.399867209537425	0.542293250615811	0.51833228880272	0.155473367230993	0.210738331751543	0.0313139104365597	0.208950912779419	0.408516993366814	0.0527967350710868	0.643943562591652	0.895335330308008	0.234348077979149	0.371812904378082	0.548396136458824	0.275817304341053	0.284646836865259	0.274547345946284	0.28004879952464	0
2011-10-04	0.330444008530807	0.125430724299299	0.897078148454289	0.716366581200308	0.281130718704	0.427940063105619	0.299449439579993	0.178965944074989	0.332390188231379	0.434251924583306	0.615881450058777	0.66152386372127	0.539247325850939	0.40512190940751	0.0100718222180491	0.334314966063335	0.388989606206042	0.431913751278967	0	0.666073462333003	0.485710064418833	0.341482593070886	0.522097526951279	0.532882510558337	0.622534107748611	0.305899196673522	0.515236064534074	0.631851296736209	0.495469914137385	0.149250890626708	0.196323239928725	0.283633418799692	0.221563459031591	0.341229919307367	0.162031697295523	0.624881730247854	0.899778449416851	0.336743899642434	0.394602272122294	0.58550254106826	0.271952088075652	0.281666352179464	0.271247116442281	0.277551797751918	1
2011-10-05	0.362231325914565	0.153249802985393	0.903616893185798	0.636303112615855	0.347457827685757	0.485304810575491	0.366258873739485	0.190366644108773	0.403714245574978	0.462723625796933	0.630980791196485	0.721507568156728	0.519508601455746	0.424213469263676	0.0097953777105833	0.390509422043794	0.371139803175434	0.426204824978954	0.111111111111111	0.665894351429876	0.470462445612145	0.35023383022179	0.513081552054101	0.52881761774636	0.605768744027219	0.318003342632196	0.515563304203625	0.588263675721264	0.50323184595884	0.154924956275506	0.26561070706107	0.363696887384145	0.258764376164821	0.309260687909409	0.275057743112163	0.615014395795674	0.907089387167455	0.378877713680678	0.469662670649323	0.649408433052979	0.269242383152572	0.279199711101519	0.270433433887858	0.276270032124174	0
2011-10-06	0.374957112841654	0.169142733220531	0.896861045423955	0.648556033163455	0.339986410657357	0.489677622193454	0.364193027777304	0.195249984447654	0.428291332782234	0.460102269886036	0.636801242773403	0.733982730549107	0.498157597728141	0.428323037030636	0.0092548418780698	0.378602255600165	0.362181545121008	0.422865839759154	0.111111111111111	0.666399369460238	0.461962791078395	0.357249306153286	0.506229772250138	0.524097675523347	0.59044794507153	0.329011494080261	0.518414763083236	0.485184768550398	0.475557838082076	0.138828695857576	0.330405994021317	0.351443966836545	0.279158572650405	0.295013743480099	0.332901080633704	0.606531007240474	0.905813343824174	0.330375740031206	0.489215930770928	0.595550952540363	0.267335766767077	0.277420149189731	0.269678793287495	0.275104815192528	0
2011-10-07	0.356996228679425	0.186508778720458	0.892409222776971	0.753962029537704	0.278985670634227	0.483527195887753	0.306372599690803	0.202682838365107	0.410900991275604	0.425981113234665	0.624282976651384	0.676945239092596	0.473173943478563	0.357553239163312	0.00826116563670298	0.354401213211908	0.341412170522566	0.436268164295462	0	0.666727371443353	0.440414008845225	0.370424575116079	0.498609653766656	0.518689073379888	0.574824665271836	0.32819634038778	0.469441880471746	0.360493909589668	0.414008072975783	0.104935240197708	0.316797356812043	0.246037970462296	0.254848430191685	0.277093165569247	0.307799134069813	0.593133757974817	0.901561714285743	0.327115730757507	0.45470356338034	0.540816638018875	0.265671827997883	0.274909119078845	0.267350368955275	0.273149265725157	1
2011-10-10	0.36798364657522	0.185504891550528	0.896088311348373	0.480101366450388	0.466613917696344	0.489843750748917	0.465683528178176	0.197527453512119	0.441414892696904	0.513981904695107	0.64093368688552	0.737652317198462	0.461458898956592	0.331475661118029	0.00816491741237379	0.439159202332491	0.438723700830162	0.489949986592016	0.111111111111111	0.666307346245228	0.535594865215512	0.357864747638449	0.50050619866499	0.514768535862291	0.565321181700987	0.327493305316489	0.411096402868167	0.332545480061644	0.474444770414543	0.202183767094448	0.404852794302182	0.519898633549612	0.33712787938521	0.293653067904595	0.448152360973659	0.600247919853478	0.90646384220349	0.279059840358168	0.603011227106242	0.755645806871499	0.267724319391868	0.273863950647871	0.270381936324929	0.274066014591116	1
2011-10-11	0.375329708454385	0.1642169492898	0.901124026147064	0.178358909072791	0.54916353816572	0.498062848013349	0.56032348636241	0.195770521678415	0.478268665500437	0.564544063382713	0.643447810540759	0.810860053779665	0.450082565424074	0.396792871828614	0.00835206919377689	0.490730057626727	0.468584163755709	0.557248616143194	0.222222222222222	0.665252767284752	0.564526679399465	0.335202632137751	0.50424637383243	0.512433457019504	0.563381905027797	0.332078661464943	0.395440256272243	0.452683265608021	0.516500143160989	0.227002137885522	0.509304422642716	0.821641090927209	0.500493951921856	0.361293638867201	0.683154769884403	0.616468830997673	0.909853179017016	0.262329595690692	0.661259723444518	0.691465015454814	0.271738301457406	0.27393891390461	0.275171147064948	0.276335931758355	1
2011-10-12	0.364567136688919	0.15008157205455	0.906297740813202	0.140959176699966	0.561716003522624	0.464382163737344	0.569402964820725	0.19853843909419	0.464552886256067	0.570408574073778	0.635114714914201	0.762772897154905	0.442078962202041	0.48175976912586	0.00870516179178523	0.522913202050321	0.478637474889003	0.608524237238614	0.333333333333333	0.710700092947485	0.574026747435842	0.31634122832774	0.506911957989913	0.511136508636738	0.566750311838609	0.33451012715278	0.386047423060418	0.35804145558511	0.554815118183605	0.21427039141298	0.552236693814224	0.859040823300034	0.622854418677813	0.448780979260304	0.81290825237257	0.630881699622396	0.906062076150289	0.264047495866722	0.634421226206712	0.617110952025586	0.275196202585713	0.274315930827671	0.278822099179222	0.278444679291573	1
2011-10-13	0.361915521777626	0.136955864621819	0.909841064332824	0.0338779120017682	0.601963537906173	0.478270451466644	0.615008617705859	0.202767169483592	0.490245056816189	0.596060233707261	0.629065744350282	0.734213340680985	0.440570390686425	0.474878557754372	0.00953387625276142	0.584830666089606	0.51231317455828	0.660032035761821	0.444444444444444	0.67194533171121	0.605727046830765	0.295947650202464	0.511444483062766	0.511070066018258	0.574922718286903	0.334742450620267	0.338349063700387	0.399611256762393	0.566833490980831	0.218721272040568	0.565556516202208	0.966122087998232	0.742936799312073	0.548710222029612	0.922569249924516	0.647579667567058	0.91078330664258	0.17621104496293	0.642463209699477	0.649646342185615	0.279682517222774	0.275615843725433	0.282760722558569	0.280996142907208	1
2011-10-14	0.360445845447225	0.139930391313505	0.914608065826868	0	0.676617227660963	0.467729564159799	0.706175132829497	0.219358800968741	0.54106375543961	0.654534874933571	0.636987987077474	0.778099797203133	0.44587449755429	0.555529195100369	0.010958164152454	0.6678583218095	0.564801314592218	0.730758563645331	0.555555555555556	0.668326324289698	0.654064789913507	0.267300451457107	0.522579659317643	0.513402678935687	0.589301740692096	0.331267317628522	0.330969304186626	0.378020558770869	0.613166633419915	0.239482997281878	0.626919853261137	1	0.835174948776878	0.647287013168968	0.979392051782891	0.672263569533901	0.917135002355899	0.170060168774667	0.688230237823121	0.702410094991184	0.287222287212712	0.278576681794103	0.28865860108544	0.284880253174325	0
2011-10-17	0.359566221953802	0.148073969885467	0.908904257540344	0.0993459290274443	0.656032499063073	0.39460208953388	0.674058292844346	0.233221969746749	0.540592965393161	0.643017779482917	0.631552026400646	0.751239912050892	0.452790275050069	0.559861113490172	0.0120193976013895	0.669288386248576	0.579499280910741	0.747384458877166	0.555555555555556	0.668190960075656	0.668665683081215	0.249631527528951	0.531322340557419	0.517141932300258	0.605923875119059	0.327440356092473	0.349218119639123	0.470191951801343	0.619514508831317	0.237174604135101	0.610646774848931	0.900654070972556	0.860940106108381	0.721931600701263	0.936082694806395	0.689002980596185	0.915256241507665	0.180069290431485	0.604291822691218	0.588088351587737	0.291725940960181	0.281880330825071	0.292105856190138	0.28779205887257	1
2011-10-18	0.362818801226168	0.155311006011066	0.916233940783391	0.0694832518033334	0.668246456395222	0.467393385069606	0.685215905814311	0.238580247451032	0.560460218250158	0.651372822511228	0.628139517879476	0.712682832182813	0.467889942510224	0.529757203737129	0.0130307601101256	0.65252869455414	0.617654420503129	0.738843141558456	0.666666666666667	0.667994428374981	0.705624074660204	0.235789703967114	0.53855751590816	0.521683507372151	0.623354039209295	0.330379621166574	0.402684278358396	0.606747010818776	0.633654690194842	0.23509142525599	0.585233526552301	0.930516748196667	0.888856141534958	0.781366589936444	0.916093664061673	0.703125677260167	0.919331085087371	0.084200317719531	0.577619335787948	0.618965436040489	0.294896411904519	0.285500584909141	0.294946567179709	0.290472325184371	0
2011-10-19	0.375079960565007	0.137129159404155	0.907054738061795	0.382975706823646	0.460359842408482	0.438621342613512	0.51708255110976	0.229853147879411	0.486836638595946	0.543925111378602	0.62026975936325	0.548404426552338	0.480280820275403	0.504240614509145	0.013487197983677	0.562689321044522	0.561582972065822	0.708249889814135	0.555555555555556	0.670426464575104	0.655459217880117	0.251040475526455	0.535511906186161	0.524664230366892	0.633385094207956	0.344210720450668	0.482214167614702	0.565901924281246	0.582563920292329	0.29614481212434	0.479596870897577	0.617024293176354	0.794728172416704	0.788377863654382	0.722921299274103	0.692659008315184	0.908989149757271	0.0656648342896244	0.399678492900213	0.426975186242022	0.294380764829841	0.286983190089993	0.291144887674427	0.289538187034785	0
2011-10-20	0.370391184152961	0.120590831960317	0.90248807848058	0.426906661968328	0.437066947130151	0.426011827177458	0.494190768598493	0.228598920852908	0.426459717714639	0.52992176378355	0.625153288219673	0.523118672172716	0.494420140245387	0.503259609824268	0.0139978197471521	0.581667588632185	0.55756834741912	0.659255376012207	0.555555555555556	0.668913737651908	0.652033871260985	0.266991815238216	0.530305568391577	0.525933324940925	0.63717860885372	0.332569821888007	0.440309020352972	0.453421652130755	0.602347313510245	0.285946375018031	0.448802513528657	0.573093338031672	0.716177672466079	0.765837042479105	0.597385500844685	0.680770327907099	0.905084595891987	0.0517981586189812	0.382846463554195	0.577211700268292	0.292485713866718	0.288288930817308	0.287812303256507	0.288335681457588	0
2011-10-21	0.368181872596242	0.109592892030825	0.897323023725152	0.459290999917088	0.419666408815474	0.386655659465572	0.478885006287652	0.226936458514692	0.380375550408431	0.52113477442594	0.627144984169074	0.686486528642966	0.504766741605036	0.504197244517116	0.0140703347498962	0.493995729285792	0.530395709076987	0.567430279700411	0.555555555555556	0.668430894093649	0.624912742411109	0.282342927208017	0.522070459492569	0.525184187473361	0.636081335811961	0.334651558339982	0.419483641941563	0.436890441100779	0.617076397493822	0.279492041014776	0.429040769860198	0.540709000082912	0.652164564953126	0.728631523246976	0.518746394465207	0.668648458001697	0.901680473685913	0.0634494216296251	0.38325998710131	0.583763408881168	0.288278175084988	0.289968045932127	0.285002226214068	0.287028779892487	1
2011-10-24	0.336952832889406	0.0947372802933029	0.901497822346727	0.313436777471965	0.509547816864187	0.361251670812617	0.576973803851498	0.227807689077531	0.401442201261411	0.581171867913708	0.635019782773787	0.741662669570025	0.523091982520102	0.594681662775122	0.0143377443794048	0.498859897404498	0.576115204962396	0.515060226055427	0.555555555555556	0.66790414123622	0.66858593691014	0.280972803742113	0.515077056983178	0.523086506155368	0.6354829459226	0.326022778629547	0.379395673237544	0.260251454927793	0.666523863637861	0.291536488350022	0.464157969173311	0.686563222528035	0.661941489317497	0.707215206442355	0.564800886439054	0.669890350885351	0.906511438494137	0.0834057169955337	0.503342815763544	0.701259233505305	0.286224234347553	0.291202459118097	0.286239409584659	0.28766734122949	0
2011-10-25	0.315780337788709	0.0822191163869306	0.897919230642358	0.502316346790205	0.450761283383367	0.368788505234631	0.516113277709915	0.22725929985389	0.384289142236735	0.543915076610113	0.63118614731514	0.728841807236248	0.547344385983876	0.531902360305526	0.0143857028034379	0.461898741311463	0.57468819278779	0.460253195610692	0.444444444444444	0.668506144770655	0.669028502884344	0.28898056667726	0.505247296029305	0.519302285823412	0.632807645093561	0.320411560422851	0.332027473438975	0.323674820801198	0.621307721668583	0.300733371635102	0.44271652393213	0.497683653209795	0.600534265281171	0.671662204364931	0.489189785225645	0.663321665660926	0.902148819998827	0.085941628313019	0.469749636887859	0.541887841737389	0.282689778559788	0.291019046739431	0.285135157003747	0.287130668310242	1
2011-10-26	0.308456829256584	0.0708321837308208	0.901712969913352	0.454460453085989	0.470276663152859	0.42497611270277	0.538261690085162	0.227112924177005	0.403809151499578	0.556366041893752	0.623386300633025	0.694347131863117	0.559849826937349	0.461134137247482	0.0142527402421626	0.449646512366763	0.521006160687219	0.466833025116779	0.444444444444444	0.668300280474476	0.614761490661307	0.292508867902089	0.497596233109136	0.514635631193006	0.629646005152432	0.321152072037425	0.298856729056894	0.329183769672417	0.633452037468515	0.3001041403256	0.408722902458958	0.545539546914011	0.576806129161034	0.639739232882838	0.482818700025686	0.660175228185314	0.90510648888452	0.100382748640081	0.520220373122324	0.624295841726905	0.282975775190819	0.290903325618368	0.285081392378555	0.287066243227631	1
2011-10-27	0.305851495245382	0.0623176053398104	0.905825636003514	0.451282371704059	0.498465979113393	0.441548222655874	0.564468580394849	0.229396069055215	0.408000760970707	0.572195022022713	0.635011805644559	0.730706724807291	0.565381407862771	0.519940406552815	0.013593148805225	0.416926523099468	0.49648743336756	0.493418895578952	0.444444444444444	0.667871205121167	0.590879531576361	0.291331670114761	0.495485174552472	0.510450002671043	0.627344109923242	0.31680844736836	0.280840228323321	0.435812123155724	0.672388027872202	0.288583100319018	0.451436339795027	0.548717628295941	0.562130278470669	0.613372582409369	0.487197633219912	0.660841352310948	0.903942724394995	0.117289230112853	0.544400588584479	0.633660202459036	0.284330624832625	0.290631117555064	0.286031768741858	0.287555011474413	1
2011-10-28	0.27884657572317	0.0544112111195883	0.908509766016429	0.608939416648548	0.500306189567749	0.496888434876781	0.559060651662658	0.227009937820849	0.420234924721744	0.567758872465017	0.628088137898325	0.722676044453156	0.566309729696823	0.47540033972189	0.0137093808622243	0.424727092439763	0.491046392430058	0.541427362318248	0.444444444444444	0.668499747341102	0.585718807435373	0.290703224574077	0.49277370678728	0.506520554370365	0.625608885828664	0.310566114842524	0.227509293745476	0.385248359444928	0.607090306273586	0.247087291974074	0.426662771552735	0.391060583351452	0.49564949868275	0.572761548089742	0.408003484090891	0.661135184915935	0.904911326550591	0.105290497190474	0.533683362932733	0.604619736676312	0.28607546967531	0.289390163264127	0.286728059664695	0.287989341608959	0
2011-10-31	0.268820732308181	0.0518106164225281	0.905304691159765	0.613879839407376	0.4987734971854	0.537404656382866	0.548936518300688	0.216942424928475	0.425072931407774	0.559791150971305	0.629832580958833	0.708783382024817	0.563577630349819	0.461792461568557	0.0135606583230211	0.416429286759312	0.469778807154098	0.556712390823028	0.444444444444444	0.671507247080529	0.565776510421277	0.290938257627127	0.490600691564516	0.502911416387669	0.624115423957449	0.302690986862461	0.199064550165073	0.356008512440651	0.568570315874381	0.23112896546057	0.426526846924377	0.386120160592624	0.449552296068961	0.529716455154963	0.371791593760977	0.660760603130397	0.904488387850489	0.102860811119375	0.516728690047981	0.60137723890536	0.285932473051635	0.288283124016591	0.287151245632063	0.288322187366927	0
2011-11-01	0.272080457053673	0.0408506761967791	0.900883364434906	0.837573588055586	0.426614573729893	0.505115697202641	0.469880793997757	0.191384991832703	0.431319019372315	0.515702607325879	0.623185211399376	0.67897360079859	0.547758708584345	0.389863051016762	0.0141426517034085	0.4704300325077	0.39731749691805	0.583558234584467	0.333333333333333	0.663204979821937	0.498536810447548	0.300265102272123	0.48709664874411	0.499273347362496	0.620435377849939	0.283200540781854	0.21341831210367	0.419124550295893	0.536184240905849	0.239819056046778	0.322221778308811	0.162426411944414	0.338375723047232	0.462500928523915	0.23847645266732	0.652818092618521	0.904769815490824	0.097761363113607	0.46411936044537	0.539660537090649	0.285750482885709	0.286410402652337	0.285439232017334	0.28749964277782	1
2011-11-02	0.271540880755313	0.0291925490795246	0.903604974168906	0.813228487955554	0.434508715094793	0.434970797892866	0.463292086682677	0.166266829631063	0.432204943816595	0.515467868747215	0.630121689414698	0.681369303354266	0.532426744482326	0.38164282907146	0.0148355993298892	0.486313142381053	0.40697242086527	0.577607486053145	0.444444444444444	0.665216925115048	0.507415595513959	0.306606511492585	0.48494455289641	0.495901794880579	0.615777643667805	0.270451440618761	0.175065515847243	0.396272186276842	0.519146683760147	0.234030067132961	0.350060963292033	0.186771512044446	0.273013031638099	0.395044688656128	0.195197318508458	0.647023495803819	0.904273151495315	0.0776800158422077	0.471630216754706	0.609578904710624	0.285289724759708	0.286322340135255	0.284514916143158	0.286945809265488	1
2011-11-03	0.263103351435963	0.0218554973295548	0.907274681170372	0.660133438547638	0.483543422464988	0.489004284582446	0.509941814443797	0.146958636165885	0.465321841908894	0.535725928031277	0.629943887852436	0.727236892229067	0.516924841614419	0.369024616704789	0.016196253602943	0.517239466461049	0.418286026247542	0.564868141750199	0.555555555555556	0.666102513682199	0.518509706561464	0.305592298171639	0.487115690996282	0.493669730054262	0.612252922865906	0.260143836172724	0.174733032055934	0.396751110819836	0.494728861372456	0.211516846790892	0.392453084512978	0.339866561452362	0.284494191209036	0.354051682713633	0.269183601295322	0.647136169748351	0.908761398933208	0.10344209408022	0.512713350747575	0.645818049436835	0.285055729669389	0.286887140024974	0.28526348484083	0.287241999132767	0
2011-11-04	0.249847467776064	0.0156596224240458	0.904761933583932	0.718660851805673	0.45688300268376	0.514858893455436	0.45531442241471	0.108821671031404	0.466135933985846	0.51567351369057	0.630710356754589	0.719588280059978	0.514918496909409	0.333299408830362	0.0171389690536936	0.457946773542891	0.487263540675767	0.545368115446327	0.555555555555556	0.666133416801496	0.582208996328628	0.308081740932556	0.491325807658671	0.492786116672061	0.608750093130352	0.253667391879617	0.138552377762811	0.277198910848383	0.491823978301402	0.211809293672647	0.419151122331615	0.281339148194327	0.271100575377056	0.322082592176641	0.283112217864028	0.644463677850028	0.907103010484198	0.0856087381577877	0.496365366316209	0.581155399006718	0.284375397702381	0.28742354927985	0.285080119345541	0.28710966121945	0
2011-11-07	0.240104192740245	0.00698511999968129	0.902514849709927	0.523272105675617	0.451939551439467	0.492730898271775	0.432046021773124	0.0927464978405152	0.48273468546022	0.510839582042875	0.626099166273783	0.702055469778701	0.51204144747258	0.365843950557445	0.0191467256265923	0.485736942071496	0.49655375782593	0.540603091554994	0.444444444444444	0.666269338008023	0.591115280730755	0.310681696849298	0.497345939888545	0.49336906930191	0.60524516898237	0.248884545233366	0.100507323777228	0.199544989268294	0.483294155059349	0.210072189433681	0.381310066152791	0.476727894324383	0.332437512371733	0.322020970688908	0.403327550968159	0.641665800069328	0.909679318070021	0.0539382519379518	0.499177806093446	0.598768813841804	0.28364598318365	0.286983940307957	0.284834928937917	0.286933881347349	1
2011-11-08	0.210652900924622	0.00966560340048772	0.905844143070757	0.187367286045533	0.511536557852319	0.479320587259155	0.52807297022397	0.0909622713052007	0.50040917477236	0.539343164018834	0.634657322572734	0.725056606834869	0.511167464383809	0.475657171513405	0.0211273836377764	0.499404610839952	0.526214962388462	0.553423772698598	0.555555555555556	0.668928918105467	0.619260290472066	0.30593490102946	0.505858026610689	0.495659188411691	0.603650217934602	0.243185156072142	0.109350017924862	0.235554850297572	0.576167149548504	0.134498132830155	0.571315181559009	0.812632713954467	0.49412743360643	0.377999797908586	0.649697359733627	0.644915867858285	0.911676914433339	0.0563539653760439	0.548298294683529	0.651886673772212	0.285049942446628	0.287599691932768	0.286238800523345	0.287650598477643	0
2011-11-09	0.220320525590645	0	0.901199218382532	0.753240218008018	0.407547174793363	0.474901996625388	0.363733267022912	0.0935810486205943	0.473821959614418	0.490604196803194	0.624481045015062	0.685283844216967	0.496345233921109	0.474900767924968	0.0221987439001581	0.443534109505212	0.447084909219304	0.554648110164044	0.444444444444444	1	0.544069972648219	0.314211860583235	0.507977042121732	0.49794529333429	0.600241579304936	0.24141901565582	0.165046410741226	0.456425048301523	0.552175343691915	0.15642383485741	0.334030401744472	0.246759781991982	0.398420583182199	0.382159936410272	0.457014331643465	0.637645112517012	0.907439352846382	0.0588147245918773	0.463946608716425	0.519265694137747	0.284742282360604	0.287212485117366	0.284534351865683	0.286787323072439	0
2011-11-10	0.233965071438121	0.00931857485735253	0.895007312386701	0.877952996937777	0.329885218220982	0.379874940158533	0.242596642310577	0.104304818431566	0.426861064361301	0.449463258322016	0.62053986182708	0.618139026613912	0.485218617593637	0.466354022809238	0.0217451829358484	0.405389785750147	0.440250044244373	0.535600533944687	0.333333333333333	0.66472670611046	0.536671909632928	0.331220568194175	0.50677865463905	0.499517416781238	0.593143846902442	0.250265190418161	0.260583700429123	0.491624269359716	0.527377559714792	0.173436576240606	0.145851425802936	0.122047003062223	0.289766606679912	0.347288555623879	0.288006819859623	0.622941904513664	0.902552735826065	0.135499601721393	0.400380287727964	0.523981285260645	0.282164021045658	0.285795385900123	0.280972274108981	0.284749143170547	0
2011-11-11	0.226081165930429	0.0206573153941079	0.889571705259567	0.83841161588384	0.325539576023213	0.320761937641771	0.258421374624763	0.104563148311872	0.411474418316227	0.454965904888755	0.624854192935849	0.656219468466436	0.471580285162768	0.376816780860737	0.0214308354748711	0.403768593822693	0.428869933047791	0.522536285608856	0.222222222222222	0.666379180412123	0.525767473475486	0.344446418972434	0.50806741898788	0.501051239723954	0.584062481856375	0.252498310334391	0.309915502147742	0.509311871510722	0.483137630064702	0.135411039620056	0.155654401314346	0.16158838411616	0.231550557209709	0.303871141378467	0.228526024796116	0.610821328195222	0.902792992361395	0.177683432754982	0.41926364924834	0.597902324735132	0.279907876030754	0.284315691792314	0.278452887566005	0.283002112048874	0
2011-11-14	0.221744336288935	0.0334502263679587	0.885972511348266	0.962790226795127	0.286939622030439	0.302591234260949	0.201867135063529	0.101254551042475	0.385544306742933	0.439111341602065	0.626682967804027	0.690618629750924	0.450553358083343	0.37795630491006	0.0208772923190858	0.413203678168281	0.397516263029226	0.503759404654487	0.222222222222222	0.666312633175967	0.495264126319283	0.359825294302386	0.500883207599969	0.500739044980939	0.572886180918575	0.245468970399618	0.293116763253648	0.454014818685748	0.490572102805549	0.130146396722091	0.188602766544605	0.0372097732048734	0.148010622048794	0.245982529926349	0.137624325388065	0.596642794938982	0.899439419051757	0.167561199341637	0.403557409097483	0.559828726915596	0.276951169146788	0.282458251003969	0.275480826798272	0.280863097824358	1
2011-11-15	0.223074081630573	0.038038069044067	0.889554292320827	0.661638706341889	0.384528350539267	0.29606722561126	0.347781282697283	0.0821427679080092	0.409544140594294	0.491277035368737	0.631291527338845	0.720649730849881	0.439171024826969	0.447068456757798	0.0206192403481651	0.446023708622776	0.428405221403348	0.470620890928006	0.333333333333333	0.665727577217355	0.525875978836261	0.360112372373531	0.493595346376429	0.498927828595447	0.56378293053018	0.232951105173709	0.279744074095257	0.440470843983992	0.513878562007668	0.152428036606333	0.295163650490637	0.338361293658111	0.200617924664761	0.225616714532459	0.26624904378763	0.594268588934779	0.903575557327803	0.201888549867853	0.494894803203773	0.67871384277139	0.274437907219971	0.28189927212364	0.2758070749935	0.28037998554323	0
2011-11-16	0.220708500438122	0.037746968214138	0.88665094085856	0.789400173384157	0.353132398671787	0.361615578985808	0.297905049670173	0.0866468862591798	0.399879169429287	0.475439502593498	0.633135242382167	0.726653090881072	0.430105024975337	0.432168629572855	0.0195481012315996	0.410362892906841	0.41549899996448	0.459996400498168	0.222222222222222	0.666285774956409	0.513170634295223	0.364135389826127	0.484820147980537	0.495598725493658	0.555462876297291	0.211989976901831	0.24781182667099	0.378201972525098	0.487314391120161	0.149047221227435	0.336283910845735	0.210599826615843	0.189743676081261	0.208271957085325	0.266739991445464	0.589090378302693	0.900217547013491	0.212507126828546	0.490881401656309	0.570624733944217	0.272919831052436	0.280979281538512	0.275045580966989	0.279447199928149	0
2011-11-17	0.231427712498924	0.050821806447468	0.882661026674783	0.938377967227451	0.300254156383002	0.370270785343358	0.223861033701565	0.102101067464921	0.379191176858454	0.444972415394371	0.620971684227579	0.675738436201666	0.424697223855123	0.423188142934283	0.0183005171375837	0.392932080906529	0.418518265483801	0.471791947325022	0.111111111111111	0.666445195896448	0.514846179653844	0.37459764667529	0.47204682727794	0.4901986953873	0.546221485812395	0.210063667026667	0.258826053177603	0.537694158773275	0.461882819605866	0.155204748279821	0.281213311727795	0.0616220327725488	0.128918543897303	0.175635002401266	0.188605638747897	0.578784995755054	0.897137851335043	0.215235044591457	0.454852625437882	0.543716091569094	0.271791756853144	0.279111654836254	0.27276321170633	0.277709616446493	0
2011-11-18	0.224942959363422	0.0635282027220125	0.879568716891992	0.997991798986856	0.283429540037967	0.3604642240973	0.231901596137689	0.118844405057754	0.34949703846834	0.437377061991985	0.626895877585504	0.679057999819357	0.419748076063122	0.362458338916813	0.016357432165506	0.385479107349158	0.407336816766429	0.478602704149713	0.111111111111111	0.666476000563046	0.503707935428308	0.384307105520355	0.454744489622432	0.482171559221736	0.536444051390594	0.203140769805076	0.238859945084985	0.445113448763261	0.454004349385084	0.154594809202119	0.2820530480669	0.00200820101314371	0.0669300339983753	0.132400179829802	0.121506507845169	0.568903504612603	0.893114329841179	0.219214462666442	0.448400707890918	0.582619469671468	0.270393563382946	0.277270229496415	0.270646025117836	0.275960941647883	0
2011-11-21	0.220263104053095	0.087415275745982	0.875844187068691	0.918923228651705	0.244509651897804	0.307211922287729	0.218698284598228	0.143517499928537	0.349095140325202	0.417604577799339	0.622632879295235	0.684881504835414	0.412971249357203	0.369298913967911	0.0143769346360427	0.341140800122947	0.36888357982326	0.49071654150894	0.111111111111111	0.666444613934258	0.465775684611478	0.397276658336624	0.437426147747985	0.472039309225134	0.525480372129533	0.201636887439569	0.245406689115519	0.416051292468268	0.459940825779851	0.15091950373868	0.241899167665584	0.0810767713482946	0.0540391267936691	0.0991107158480519	0.138078514646071	0.556304612018997	0.893484169053094	0.234944115429472	0.420418868527143	0.554005369531611	0.268913056227874	0.27503431227006	0.267804682598813	0.273745135433792	1
2011-11-22	0.226018059517467	0.0965109697299927	0.879244808296232	0.743084127018127	0.325988053628405	0.390255371485091	0.327490775540191	0.153268415391744	0.376764971523383	0.457880713800712	0.633814626951002	0.711395758466586	0.410386831640262	0.375298994695	0.0136127762727607	0.407242099258566	0.403156950949617	0.496547767655728	0.111111111111111	0.666164754937765	0.500030148735282	0.397079463073636	0.423243957148701	0.460894904205513	0.51671944763096	0.201042472142066	0.240798289969461	0.50049343839545	0.483164975892645	0.1677465763916	0.316328848758316	0.256915872981873	0.10868072836883	0.0958491456113937	0.249200021343911	0.553905010285354	0.89617429794232	0.230367088564776	0.486400752091365	0.664066222440596	0.267133551210672	0.272871182099998	0.267718927123558	0.272925137571214	0
2011-11-23	0.227900053990564	0.109503582357731	0.87568414167586	0.966282699163576	0.262936912458552	0.300025178334134	0.257212166456439	0.16793253844231	0.362723617519344	0.420258270748809	0.626210549079613	0.70194671330612	0.405277572523228	0.305074841559265	0.0135591066965991	0.407484476958573	0.373262885359029	0.486881302346082	0.111111111111111	0.666527119620524	0.46934602982791	0.406635344348294	0.414997653868719	0.450212568611106	0.507448944589376	0.200264017471222	0.243890045339143	0.446324301343393	0.43232076453021	0.168627820923658	0.291087546648814	0.0337173008364244	0.0648414343077409	0.0784859818200752	0.185146930067184	0.54404774599493	0.891546440008104	0.244793227454718	0.436934951447021	0.524499791393856	0.264565404846753	0.270812129895526	0.265366200478421	0.270993864591846	0
2011-11-25	0.23516210286205	0.126179102263587	0.873566048568644	0.993790880297846	0.242222819367791	0.277475181363291	0.25404619702757	0.178856211333325	0.346679349477037	0.413150777047882	0.621881959102923	0.675747866005943	0.386588626432092	0.25794950364021	0.0132575208857768	0.396393199027599	0.340350046500959	0.478761809624065	0.111111111111111	0.666532225651174	0.437202254495605	0.416362677696195	0.407347859516435	0.440027693567733	0.497746665871614	0.193602212017979	0.19591269765126	0.416188073780718	0.429364931388416	0.168829917014586	0.279314148573634	0.0062091197021544	0.0257227020543592	0.0533572653874485	0.140095492294594	0.533946524132541	0.888904441113388	0.160781346625597	0.437259921932208	0.57408464273057	0.26256634290695	0.269236362420473	0.26297304308001	0.268960948897055	1
2011-11-28	0.251104269149552	0.131208228726073	0.876446143980374	0.714363629124671	0.366535154915131	0.304113533805056	0.387627411541375	0.176150759506341	0.371100938255811	0.479910867770678	0.634350684016865	0.73178204439976	0.379317791094329	0.309318404126085	0.0134434740461689	0.465958082307154	0.418319033028777	0.492455594783077	0.222222222222222	0.666101323980523	0.514446315383195	0.407266093123797	0.405437281178802	0.43147044260155	0.492123789216338	0.19425672973863	0.185913540464604	0.505945828501658	0.475405888824464	0.209777567938889	0.363573795532493	0.285636370875329	0.100131623385667	0.0623848791360567	0.274495722945267	0.538536994424598	0.892021323633575	0.146941490155529	0.545326712882039	0.706230192266217	0.262736789080485	0.268617699154273	0.26440379009484	0.268959168656829	0
2011-11-29	0.253217882916884	0.130190431321942	0.873321266415099	0.740922107358965	0.345982245111986	0.293634199744967	0.36970236808827	0.169349909141531	0.379528936024368	0.473239543887354	0.63061065838098	0.730277678029045	0.377242010839949	0.244278336590684	0.0131239983133174	0.418156801717494	0.4420087564348	0.510704698944746	0.222222222222222	0.666408993514812	0.537125111569324	0.402444953273884	0.398237739875759	0.423082104220692	0.488839164402072	0.193988873531972	0.188772743249754	0.439212892075831	0.444503187383957	0.198938168857679	0.374816219550414	0.259077892641035	0.140186568407086	0.0822809272194335	0.327954569675451	0.540371272193236	0.890752429051445	0.165599893466463	0.523069291855295	0.578873916465884	0.263342002196763	0.268176637487594	0.264653539688585	0.268571138945762	1
2011-11-30	0.247657616535935	0.123373013790816	0.876696257100458	0.464400042909769	0.424893104793128	0.341008178159783	0.46846750481065	0.165640966910711	0.419067353742257	0.520071702234739	0.631678201320081	0.725661138394656	0.38321105742952	0.317838514721668	0.0135338953329419	0.468354059747965	0.473859471271263	0.533356740937203	0.222222222222222	0.665406996935391	0.569136561367608	0.386982184256618	0.397433408595068	0.416199101530194	0.490007220542187	0.190494146994777	0.202386995363984	0.38437569376131	0.510196230527088	0.205521357913919	0.477033496128964	0.535599957090231	0.266333173346385	0.139250350284728	0.503462807437718	0.551050914939057	0.895068578818577	0.118829325870833	0.580261382553287	0.675384069960965	0.264163862269801	0.267694079105567	0.266990184267695	0.269445169078868	1
2011-12-01	0.233726721938739	0.107060337089032	0.879915299555041	0.138044544245116	0.470245759149286	0.386935665529564	0.535459875598284	0.159264300057793	0.460112652980124	0.550069593583686	0.633930948136423	0.747716640087896	0.392534340903524	0.406570123526155	0.0145822471790399	0.52010181484099	0.510654285859296	0.581486808422194	0.333333333333333	0.674538495946671	0.605594951602136	0.367869394302779	0.397687406572884	0.410747119710512	0.495748051671309	0.192155555245534	0.208948512792501	0.312668906917643	0.562218182475016	0.19662014249887	0.556296731927326	0.861955455754884	0.467795397758258	0.247029587267293	0.762657088701064	0.5655085891974	0.898245136291033	0.140107805973181	0.611950056767439	0.648074017937905	0.267188433391986	0.267924072062987	0.269929612572483	0.270918882192031	1
2011-12-02	0.227746777148187	0.100524119480202	0.883066785394353	0.142371232606103	0.484039024833298	0.302006329346672	0.562749916677849	0.15062671313049	0.459943503037573	0.561921396012337	0.633661558313515	0.727879722455774	0.396698478196711	0.497913894092858	0.0155114795044435	0.537313253147898	0.484775363075241	0.629892896733315	0.444444444444444	0.671168924608501	0.57991334939029	0.351023472786156	0.397124715173293	0.406264974817855	0.504733622372476	0.19042471431189	0.213167753609622	0.336029194179437	0.570090903633809	0.196808867556807	0.613265841575088	0.857628767393897	0.600547576759357	0.364876403543641	0.874624385043361	0.579089847509283	0.895908589814735	0.11459783322773	0.594145323257866	0.61655310428225	0.270962668109149	0.268818583654661	0.272316052241451	0.272358991647772	1
2011-12-05	0.226350073425106	0.0989685834557794	0.886036645902048	0.113178257724885	0.510097154830871	0.317109581324523	0.609843837816286	0.141974546592469	0.455486895820712	0.579759437464661	0.630803936572997	0.720987991004026	0.406317648857554	0.572150722818763	0.0162420736491762	0.575760905938159	0.509227947292471	0.648250165062377	0.555555555555556	0.66857291959421	0.603812846500302	0.33443778453657	0.397653319953972	0.402792515112645	0.516348566707047	0.191951455813756	0.210960823561189	0.411618410843108	0.598942734575883	0.191530475966897	0.611835289358131	0.886821742275115	0.699547453868486	0.477740946059575	0.9267416803477	0.593225288200165	0.895395879647888	0.130396208649428	0.579905927887812	0.628471996650911	0.273402274063411	0.270133791905353	0.274705158498474	0.273975482018637	0
2011-12-06	0.216530918906126	0.0955978251799414	0.883678798976538	0.174651364158315	0.490153892953261	0.270251316961585	0.593570161287863	0.135025293691817	0.444517944003439	0.571945109871471	0.627519482222208	0.712639412389527	0.420432591823196	0.504889088052789	0.0165930095004551	0.535794151772654	0.52681208977772	0.663667050342744	0.555555555555556	0.675615731778722	0.621538401997638	0.324322351047626	0.397491831504059	0.399979947643198	0.528500441914053	0.192321400612385	0.18597520961974	0.363228695780025	0.559741865021049	0.178028984810002	0.577452907798093	0.825348635841685	0.743440314825075	0.568191317094725	0.899081774669222	0.602722117562428	0.89413322316388	0.132470243904048	0.542527030181059	0.586619708358876	0.275966078036446	0.271730663239092	0.275801151314546	0.275025329447827	0
2011-12-07	0.211130430459338	0.0865198458829195	0.881145123272549	0.230152782748746	0.471768009270304	0.248109610413481	0.594110409384821	0.112825294572395	0.443249039073573	0.567158530689071	0.626394818942712	0.701005163729357	0.435528493878025	0.441039401732197	0.0177033951661947	0.568543414147404	0.528836358881541	0.664728989537905	0.444444444444444	0.671227760412496	0.623804766819814	0.318867819087864	0.3995453360579	0.398169867253315	0.539882983171042	0.189664064886714	0.17423103825324	0.423613280592189	0.567053466808997	0.175430922333143	0.540857098383384	0.769847217251254	0.752742712971825	0.631714520380644	0.837499106790319	0.60867694887858	0.894520899036302	0.114297498043269	0.50581231258952	0.588105066320391	0.276961280714134	0.272646283236229	0.276083323819994	0.275638054305297	1
2011-12-08	0.205335766784587	0.087159454951546	0.884274167837869	0.183306210480792	0.486350419696998	0.25288215606038	0.625293303895502	0.106678525431188	0.419349859694462	0.575950991276633	0.632065668683356	0.708820876012472	0.452712092128825	0.524510126128571	0.0187007524942135	0.589946418053576	0.553719585734324	0.642890959090536	0.555555555555556	0.668347453835847	0.648983257599817	0.313156164105956	0.401671055249654	0.397177248873187	0.550669100538136	0.184601077191816	0.191575888872831	0.400727316156304	0.596848523751618	0.163191937954149	0.555103251845928	0.816693789519208	0.775791351180243	0.68204887038386	0.819409463489664	0.614910054687503	0.891032028203326	0.0950937414537463	0.50709247767107	0.61494835774615	0.27735560364328	0.274369067856759	0.276649991125662	0.276347217207362	1
2011-12-09	0.201169755477613	0.0877533776581272	0.886743383077459	0.0949775187902647	0.514013193500841	0.338234059925631	0.661229891949097	0.110567019490758	0.428607527733596	0.588255885082951	0.628444366307877	0.718438069290492	0.466020926372154	0.591436935118811	0.0199050859485955	0.548038000853726	0.538656808986778	0.616320989938448	0.666666666666667	0.667988508937738	0.63313087425522	0.305852161696095	0.4027055403266	0.396604797752869	0.561353751530462	0.172167417560046	0.179203986915069	0.40458795009277	0.615013706529902	0.161051133149554	0.541507595036834	0.905022481209735	0.822922015738799	0.731934232228744	0.849052264102868	0.622540553334452	0.89340396208109	0.0678369290741584	0.523250538288576	0.625696503628481	0.277921805171006	0.276556218642019	0.277741525490383	0.277319326246149	0
2011-12-12	0.19305708027319	0.0844027290411062	0.884240296412914	0.148093338030899	0.493389581209147	0.332500735407137	0.62635766256484	0.114822805230056	0.436097038145513	0.577796052232165	0.628232392944387	0.710943819417409	0.487215045841118	0.606319696090223	0.0214084491678209	0.553157605164884	0.564336810211707	0.594873588093204	0.555555555555556	0.667781139287056	0.659707449611947	0.302668742080603	0.404021262100211	0.396428736804391	0.570866223504432	0.162372899647458	0.172224472336036	0.367661482560903	0.629540827097122	0.151376134622961	0.519643154034348	0.851906661969101	0.835240862684003	0.76945919016749	0.826038826745457	0.626887881483173	0.893651287000912	0.0674621340058597	0.50607747766061	0.588826757330759	0.277752800445666	0.277700377196748	0.278040002967138	0.277879031072001	0
2011-12-13	0.193377724430003	0.0755966604168408	0.881422426649916	0.23851006994154	0.458410255502287	0.347158872076021	0.575608404559694	0.117761517552382	0.425190756394255	0.560711943355384	0.628667874638581	0.698266069634011	0.508749525227453	0.530655362940868	0.0216324918997482	0.50425791393409	0.565630810757693	0.571228784134683	0.555555555555556	0.668285435907622	0.661724863787372	0.303918747147335	0.404369818671273	0.396362568028225	0.578240927535107	0.159763303750782	0.182305501278611	0.412521874965361	0.593449999133845	0.146290912090735	0.500533555643888	0.76148993005846	0.810937617188779	0.786055603392208	0.757587421432669	0.627497121571466	0.891443755699535	0.0873876440379657	0.487340970738659	0.578967669651883	0.277443695527766	0.278836522627928	0.277508358999505	0.27793582260217	0
2011-12-14	0.195990590543139	0.0752603400355996	0.878039544271733	0.495732811008708	0.369599091480784	0.2567024822284	0.460010390044126	0.11745479564159	0.407959506908499	0.520960262704863	0.61764254381403	0.678502185141851	0.517985972511683	0.531559105566646	0.0209566268449898	0.448476736602313	0.495392302564718	0.552396329437677	0.444444444444444	0.66818771903118	0.590665988594762	0.314530961097832	0.399496150167829	0.395265425239238	0.581423113057781	0.159098989257406	0.216991378172452	0.441814334229584	0.597456473974893	0.141020965905834	0.394688752713905	0.504267188991292	0.702232598890706	0.759457388222347	0.578086532994165	0.620124353510871	0.889269040888045	0.15248373337064	0.432104123479977	0.534236555664254	0.27615816849078	0.278690227851415	0.275075394246351	0.276841077176024	0
2011-12-15	0.191081077721784	0.0749480425387328	0.875909485588966	0.658126941620342	0.357760607238332	0.27110589716559	0.447052491599145	0.116764774358614	0.389758210949243	0.516293008954029	0.627083262717901	0.683202908903932	0.530925119658422	0.530369040084201	0.0203391340660632	0.437006735779771	0.50093327062563	0.534966281543539	0.333333333333333	0.667998926254555	0.59634084816618	0.323925342009645	0.39833046199383	0.394137956506782	0.581506716699179	0.156516217857477	0.190962701949646	0.453991848887857	0.605215120923596	0.137377920042217	0.350313437203364	0.341873058379658	0.571362149020128	0.69638320654999	0.400995190525029	0.613216903454937	0.887089463413243	0.131355805316417	0.435377357309482	0.59260956500026	0.274465351130363	0.278035915023216	0.2731520366672	0.275779904348212	1
2011-12-16	0.177056633273012	0.0740831802392982	0.879413676555082	0.585646810043257	0.383636668619598	0.289481356430784	0.474130626737315	0.116301529679994	0.376062283921987	0.525531734671553	0.629234854850272	0.712361980962929	0.534736996776537	0.538124681296031	0.0198535778598576	0.432667563313508	0.477973997133384	0.51479692926771	0.333333333333333	0.669411016400822	0.573196586121407	0.328566169176221	0.401425905695993	0.393899195762221	0.580293878720294	0.154893918945457	0.232933036673948	0.494796253904542	0.56787322661097	0.098379231382547	0.350483555054942	0.414353189956743	0.510180603589347	0.633136484312284	0.360617152112141	0.609775265167087	0.885376770915899	0.133027714691654	0.465137079253533	0.619364807275488	0.272645409994821	0.277404154201715	0.272371333102596	0.275187037638567	1
2011-12-19	0.168342163171561	0.0714775308314956	0.881371887224776	0.751710844459067	0.398715997600952	0.33786341682252	0.48654219191411	0.114530610886271	0.373502327168038	0.529548991181447	0.629589586136613	0.716355934091516	0.531680836041356	0.601852099733182	0.0195932289948829	0.444876690485715	0.462910961305922	0.504274382167643	0.333333333333333	0.668313383620678	0.558365206300896	0.330557985987343	0.404898271311335	0.394452158806519	0.578712178987214	0.151106066748145	0.198692046266937	0.352679109406177	0.58187650952868	0.0949231376230349	0.343381144558154	0.248289155540933	0.409672692272378	0.556149523326947	0.260473889027218	0.608290746121704	0.884833437756549	0.123722205514905	0.490266465723418	0.612175575354341	0.27125444857926	0.276618085480151	0.272137793772618	0.274859502439566	1
2011-12-20	0.177177776965698	0.0715448877275908	0.884175510037896	0.0439310827243019	0.54484863041083	0.384793844936142	0.669298424093548	0.107987438247609	0.404476170517584	0.58951857816921	0.640764818757675	0.741342617526956	0.532401186947325	0.597008216014807	0.0196450337090758	0.504761532854379	0.502625243829824	0.515734260012	0.444444444444444	0.667975443625603	0.597156923606803	0.316691445714322	0.41466658280765	0.396987438666963	0.580896838994141	0.148030268873205	0.211103300898972	0.413056674537067	0.597098092636925	0.121131413550909	0.525739994446195	0.956068917275698	0.597200310998238	0.569796650285027	0.610631263696538	0.619754401094547	0.888442303120887	0.169779818549823	0.597018609304033	0.710446069958859	0.27228576190281	0.276982007121299	0.275295234708632	0.276410581415573	1
2011-12-21	0.171122611392914	0.0741718190124296	0.886361671905641	0.0473896397363294	0.549369197794989	0.372145382363728	0.660301901029036	0.108965553791065	0.434970453506479	0.586965118727629	0.632357406583307	0.740352894433683	0.529229858134353	0.586683671398852	0.0205193258167231	0.500553700355818	0.493301916266459	0.546358992505111	0.555555555555556	0.668369550914804	0.588083521218973	0.306055948308098	0.420566884555162	0.400279831612827	0.585366807827187	0.143974016204084	0.193842267428105	0.369906114336541	0.57943774286036	0.114973779654574	0.559003729603892	0.952610360263671	0.720974951663209	0.621778323189575	0.787759646227343	0.629175498164802	0.890419135132014	0.183376434484952	0.590408500474619	0.606510384272362	0.274634363750959	0.277517691733822	0.277520750776123	0.277745836496236	1
2011-12-22	0.166035564351472	0.0802591706778008	0.888044092354409	0.0296689736765948	0.568951855525892	0.465008292154963	0.676427012811175	0.103998268369767	0.458314142124195	0.589240890223877	0.631293471573495	0.712361870775928	0.531427285184866	0.570299512714259	0.0214767468946002	0.497114480438879	0.507104295133062	0.583789276740345	0.555555555555556	0.668331046913431	0.601371507368526	0.296243558690757	0.428129980404706	0.404534176951035	0.591512783841779	0.137700738316782	0.156420409918423	0.318348980711943	0.580382004890573	0.115156639420006	0.590883456347788	0.970331026323405	0.809864113119114	0.687229760422027	0.879637617872318	0.638329711902685	0.891802655042103	0.156735114152821	0.581964305262218	0.618782461495388	0.277466820733041	0.278091957441876	0.279510798298767	0.279116338343736	1
2011-12-23	0.162307746678057	0.0944205049671313	0.890283889798167	0.0110578357198096	0.611660010154826	0.548560827102864	0.742822761709417	0.0914131347591538	0.485061192500267	0.602287969568907	0.631961177883868	0.720052342539566	0.535431220864679	0.562032225855819	0.0231547349934168	0.522271932382554	0.529134326692364	0.624606473126389	0.555555555555556	0.668189184229403	0.622416839052419	0.284371491240577	0.439282733690554	0.410327186200307	0.59958959966827	0.13810722663272	0.155243980669904	0.392355037478571	0.584883532618379	0.11738500335005	0.637107921688115	0.98894216428019	0.875816521367255	0.753714256970577	0.925292584692853	0.6495528842951	0.894408511892789	0.17273053459062	0.586873481664238	0.639043997171686	0.280689267276534	0.278798681520117	0.281990082831915	0.280870480679434	1
2011-12-27	0.163985171553789	0.117300443723644	0.89248774395661	0.0892544665671903	0.638522392776942	0.506818841825404	0.758830905874433	0.0956743742405281	0.496046025689105	0.610005746052407	0.634575552999338	0.722867841103072	0.537146090642679	0.627664687151931	0.0252337484196605	0.546611196506047	0.53454285310047	0.66329034313131	0.666666666666667	0.667836081499594	0.627304124784916	0.272949017727556	0.451525911731978	0.417584755517175	0.609147068743125	0.135848604006538	0.154356842114648	0.438318380950407	0.601831881467937	0.116341015110108	0.655020519747008	0.91074553343281	0.891663595748302	0.803527712240916	0.893751948988308	0.66081359841223	0.894868085708582	0.194736140827997	0.577658462955516	0.626777732246753	0.284202055097731	0.279867872271331	0.284414566706103	0.282729346919073	0
2011-12-28	0.169569795549542	0.134131116053671	0.890586637483078	0.210833978858029	0.581758325346772	0.502755805511401	0.679822180956869	0.0910962497365275	0.485484961525327	0.584259212856836	0.627278032854847	0.708386696718602	0.53448939520112	0.637625143177072	0.0264983038061041	0.566790659769561	0.511815456132602	0.66242121960194	0.666666666666667	0.667983894483034	0.605662924109395	0.269506824312039	0.463528247162403	0.425962371158312	0.617777536508987	0.131761250471622	0.139564413106557	0.391261480164672	0.595642957104305	0.119880781486755	0.596139649426438	0.789166021141971	0.858505692822846	0.825248627604953	0.80151951770384	0.665675190088777	0.893288108703703	0.174090200735074	0.519780284625922	0.573315308534604	0.285168348731064	0.280874468700326	0.285092887500529	0.283735231505205	1
2011-12-29	0.167304608970499	0.145925482499077	0.892382288592316	0.133321228219948	0.604639176586504	0.462938604400808	0.699646992974668	0.091904899609477	0.491082884982229	0.5904126322142	0.626017449897533	0.706307429718851	0.532099830745567	0.568726548155895	0.0284959874467701	0.581823588122669	0.525949690462976	0.653217477107796	0.777777777777778	0.667942802522173	0.619120471056841	0.26528603159368	0.472882414765066	0.434668640702849	0.625846447245271	0.126486310376333	0.123450747942844	0.33383096685611	0.598376022450677	0.120271415793392	0.561517299804268	0.866678771780052	0.86427568389269	0.841728338148055	0.792117828967771	0.67114167612951	0.895187279493436	0.127588169721925	0.527159238554825	0.621399921948957	0.28642065140226	0.282688968603741	0.28614312234045	0.284886568910425	0
2011-12-30	0.166724708719585	0.158263103400909	0.890888570391444	0.137073081205299	0.602775011863135	0.409968461039272	0.674555347323464	0.0969000249764082	0.490812761487715	0.585684849655629	0.630523453245573	0.712080258929961	0.534245700609931	0.556422959156372	0.030763976855148	0.572611633176319	0.535604510778229	0.637778463656497	0.777777777777778	0.668113264280434	0.628534913901049	0.263281816186268	0.484746983090652	0.444175699237255	0.632847047126386	0.120723786457546	0.0947687056028596	0.345124956074909	0.588248366109074	0.119549456501838	0.553466599036868	0.862926918794701	0.866773097218716	0.853580078300522	0.78212030988434	0.674717213033247	0.895351341811899	0.107145050281208	0.51503981819533	0.601754749477837	0.287352291628439	0.284585701489643	0.286814332865464	0.285812679542097	1
2012-01-03	0.171644001817786	0.180837292919067	0.893401248139894	0.0401828023267118	0.659565437718527	0.467360434929732	0.729136306149031	0.11103212888232	0.493337438594121	0.609797004633444	0.632455798571828	0.721040659031514	0.541741239467233	0.634517640916961	0.0332386350427503	0.592066584176188	0.58487410102184	0.620959984519953	0.777777777777778	0.667745752716563	0.676051739383488	0.256385628417586	0.499014759788854	0.454838288335388	0.640298173227323	0.118590189311859	0.132334001795667	0.45360438577261	0.613852217007227	0.123336952385132	0.586087220718155	0.959817197673288	0.903281876903261	0.874130254934703	0.827811673038747	0.682342712761019	0.896269662421879	0.104846009277051	0.546882271793525	0.649248109004399	0.288493372698299	0.286784488041866	0.288764034775992	0.287395198571423	1
2012-01-04	0.165711626690012	0.205285977072139	0.895563083107929	0.0369526993016141	0.678066809281649	0.505025462848415	0.723985487186093	0.124882197081923	0.501227895830904	0.615172076792671	0.630077856582618	0.725006264997071	0.549844665140168	0.715544381230223	0.0354948115761885	0.544510161617297	0.59635343982606	0.600867661856571	0.777777777777778	0.667597736480848	0.68696183979147	0.250208952720394	0.508632051282197	0.465428912250554	0.647924871959282	0.115891411682516	0.14462613714856	0.396018967628565	0.630711977165388	0.11835036758794	0.575164414488476	0.963047300698386	0.928782678189425	0.896665509330522	0.849448389195191	0.689485403148732	0.897827265831228	0.127388602247321	0.550754949360413	0.619016791962058	0.289491453760802	0.28905752002864	0.290596738333344	0.288982574646571	1
[truncated: 1,507 more rows]
