# Supplementary material for: An Empirical Study of Machine Learning Algorithms for Stock Daily Trading Strategy
Source: Hindawi journal article supplement (doi:10.1155/2019/7816154), 2019-01-01
Supplement: f1 [file 7816154.f1.zip › Optional Supplementary Materials(Data, code, and results)/SPICS/AAPL_New.csv]

	Open	High	Low	Close	Volume
2001-01-02	0.95246	0.979246	0.930139	0.95246	113078000
2001-01-03	0.914578	1.070828	0.910114	1.048507	204268400
2001-01-04	1.169535	1.195207	1.074671	1.092528	184849000
2001-01-05	1.088685	1.119935	1.026185	1.048507	103089000
2001-01-08	1.087298	1.090641	1.01587	1.060513	93424800
2001-01-09	1.073746	1.132896	1.055889	1.100532	147232400
2001-01-10	1.069441	1.091763	1.024798	1.060513	145195400
2001-01-11	1.027557	1.188272	1.027557	1.152557	200933600
2001-01-12	1.149639	1.158567	1.091603	1.100532	105844200
2001-01-16	1.118852	1.176887	1.087602	1.09653	76529600
2001-01-17	1.130091	1.130091	1.054198	1.07652	210218400
2001-01-18	1.134079	1.201044	1.120687	1.196579	306752600
2001-01-19	1.24414	1.253068	1.190568	1.248604	194166000
2001-01-22	1.219203	1.259382	1.17456	1.232596	129831800
2001-01-23	1.227813	1.343885	1.209956	1.312635	219882600
2001-01-24	1.321563	1.326028	1.24567	1.312635	179272800
2001-01-25	1.32126	1.32126	1.263224	1.276617	122427200
2001-01-26	1.248142	1.270464	1.216892	1.252606	120705200
2001-01-29	1.236886	1.393136	1.236886	1.388672	213882200
2001-01-30	1.379282	1.410532	1.330174	1.392674	173105800
2001-01-31	1.375741	1.44717	1.371277	1.38467	182676200
2001-02-01	1.321404	1.379439	1.308011	1.352654	92423800
2001-02-02	1.356354	1.414389	1.311711	1.320639	106835400
2001-02-05	1.314947	1.319411	1.261375	1.292625	71528800
2001-02-06	1.283454	1.371625	1.272296	1.352654	115677800
2001-02-07	1.321942	1.33757	1.261678	1.328642	98471800
2001-02-08	1.315249	1.350963	1.288463	1.328642	151032000
2001-02-09	1.322807	1.345128	1.193342	1.224592	147520800
2001-02-12	1.215967	1.282931	1.19811	1.26061	68530000
2001-02-13	1.282628	1.318342	1.215664	1.224592	59267600
2001-02-14	1.226283	1.257533	1.177176	1.248604	77280000
2001-02-15	1.257835	1.320335	1.257835	1.284621	77854000
2001-02-16	1.216588	1.252302	1.198731	1.216588	65977800
2001-02-20	1.235067	1.252924	1.163638	1.172567	78723400
2001-02-21	1.163942	1.284478	1.163942	1.208585	97564600
2001-02-22	1.22244	1.244762	1.146547	1.204583	107990400
2001-02-23	1.19119	1.209047	1.164404	1.204583	73466400
2001-02-26	1.217354	1.261997	1.18164	1.248604	51609600
2001-02-27	1.2339	1.245064	1.191492	1.2406	87129000
2001-02-28	1.248923	1.253387	1.159637	1.168565	127058400
2001-03-01	1.133616	1.200581	1.088974	1.200581	82615400
2001-03-02	1.165632	1.317417	1.161167	1.232596	101550400
2001-03-05	1.233203	1.31356	1.224274	1.304631	81043200
2001-03-06	1.320859	1.416845	1.318631	1.376666	182950600
2001-03-07	1.365122	1.387444	1.324944	1.360658	104885200
2001-03-08	1.323717	1.354967	1.305859	1.332645	51214800
2001-03-09	1.323412	1.327877	1.278769	1.296627	74783800
2001-03-12	1.26847	1.281863	1.156863	1.192577	97755000
2001-03-13	1.203499	1.252606	1.154392	1.252606	110832400
2001-03-14	1.170241	1.313098	1.165776	1.308633	119443800
2001-03-15	1.345431	1.381146	1.26061	1.26061	132329400
2001-03-16	1.211965	1.305715	1.203036	1.256608	117579000
2001-03-19	1.258601	1.321101	1.240744	1.316637	89002200
2001-03-20	1.334267	1.349896	1.26061	1.26061	124801600
2001-03-21	1.264066	1.342194	1.235052	1.288623	92843800
2001-03-22	1.295384	1.393598	1.281991	1.38467	180825400
2001-03-23	1.405748	1.512891	1.401284	1.472712	236222000
2001-03-26	1.491023	1.535309	1.348166	1.394594	183612800
2001-03-27	1.39796	1.477246	1.395103	1.464388	135955400
2001-03-28	1.413139	1.443139	1.37171	1.419567	146165600
2001-03-29	1.388332	1.508332	1.369046	1.442618	153266400
2001-03-30	1.447448	1.459591	1.36102	1.413163	100087400
2001-04-02	1.418143	1.458857	1.368857	1.382429	85227800
2001-04-03	1.375987	1.378844	1.28813	1.295987	92171800
2001-04-04	1.267176	1.302176	1.195033	1.248604	171371200
2001-04-05	1.317041	1.452755	1.274183	1.336326	111690600
2001-04-06	1.333397	1.35054	1.269112	1.318397	81222400
2001-04-09	1.32591	1.372339	1.28091	1.315196	66645600
2001-04-10	1.329814	1.458386	1.321243	1.411243	114343600
2001-04-11	1.480161	1.481589	1.358732	1.395875	83524000
2001-04-12	1.364145	1.478431	1.344859	1.435574	74733400
2001-04-16	1.419252	1.441395	1.331395	1.372824	71306200
2001-04-17	1.363374	1.364088	1.249088	1.306231	171299800
2001-04-18	1.372123	1.551409	1.337123	1.459266	275210600
2001-04-19	1.634733	1.649019	1.495447	1.646876	468417600
2001-04-20	1.595478	1.645478	1.571907	1.603335	173350800
2001-04-23	1.559179	1.606322	1.534894	1.552751	135381400
2001-04-24	1.560092	1.590092	1.501521	1.538664	94284400
2001-04-25	1.546417	1.592845	1.500702	1.582845	82695200
2001-04-26	1.61521	1.681639	1.58021	1.580924	199924200
2001-04-27	1.606182	1.684039	1.574039	1.677611	113253000
2001-04-30	1.718578	1.748578	1.587864	1.632149	123694200
2001-05-01	1.62318	1.701037	1.60818	1.660323	106813000
2001-05-02	1.684726	1.71044	1.643297	1.702583	92131200
2001-05-03	1.670356	1.690356	1.581785	1.598213	75385800
2001-05-04	1.54094	1.65594	1.52094	1.648797	70263200
2001-05-07	1.645356	1.655356	1.589642	1.598213	69137600
2001-05-08	1.628954	1.636097	1.528954	1.57324	78859200
2001-05-09	1.546892	1.576177	1.51332	1.535463	81222400
2001-05-10	1.559141	1.579855	1.469141	1.472712	72244200
2001-05-11	1.474535	1.508821	1.456678	1.463107	50761200
2001-05-14	1.46271	1.519139	1.45271	1.491281	77305200
2001-05-15	1.49781	1.649953	1.474238	1.484238	59256400
2001-05-16	1.483146	1.571717	1.45386	1.543146	80582600
2001-05-17	1.5565	1.563643	1.4865	1.507929	83029800
2001-05-18	1.494505	1.514505	1.477363	1.506648	39762800
2001-05-21	1.513569	1.533569	1.472141	1.508569	115249400
2001-05-22	1.540442	1.549727	1.497585	1.504727	103229000
2001-05-23	1.524582	1.524582	1.46101	1.487439	70260400
2001-05-24	1.491947	1.492662	1.44409	1.485519	67939200
2001-05-25	1.488774	1.495202	1.438774	1.457345	39685800
2001-05-29	1.43546	1.448317	1.327603	1.374745	128997400
2001-05-30	1.336532	1.336532	1.232246	1.266532	194269600
2001-05-31	1.266704	1.298132	1.244561	1.277418	110723200
2001-06-01	1.283321	1.351893	1.272607	1.337607	114018800
2001-06-04	1.35288	1.355023	1.308595	1.32288	70480200
2001-06-05	1.330808	1.352237	1.298665	1.340808	117948600
2001-06-06	1.341648	1.341648	1.298791	1.327362	55794200
2001-06-07	1.319054	1.389768	1.300482	1.386911	81295200
2001-06-08	1.388712	1.388712	1.321569	1.36514	85656200
2001-06-11	1.355322	1.356751	1.276751	1.28318	73500000
2001-06-12	1.261898	1.327612	1.261184	1.300469	75948600
2001-06-13	1.378571	1.400714	1.281428	1.310714	127871800
2001-06-14	1.284365	1.31365	1.265079	1.272936	74337200
2001-06-15	1.284507	1.330936	1.230936	1.308793	113656200
2001-06-18	1.307463	1.338892	1.278177	1.301749	86478000
2001-06-19	1.339928	1.379213	1.279928	1.292785	80271800
2001-06-20	1.268265	1.400408	1.266837	1.387551	107905000
2001-06-21	1.372913	1.476484	1.34077	1.440056	85332800
2001-06-22	1.441043	1.478186	1.389615	1.425329	71506400
2001-06-25	1.429675	1.536818	1.426103	1.536103	109887400
2001-06-26	1.49145	1.522164	1.467878	1.520736	68195400
2001-06-27	1.529483	1.541626	1.434483	1.494483	93532600
2001-06-28	1.472289	1.533717	1.464431	1.507289	87102400
2001-06-29	1.518006	1.620863	1.485149	1.48872	128847600
2001-07-02	1.511768	1.553911	1.476054	1.53034	57512000
2001-07-03	1.502927	1.550784	1.502212	1.526498	28135800
2001-07-05	1.514163	1.526306	1.47202	1.484878	38073000
2001-07-06	1.462745	1.477031	1.38846	1.410602	75730200
2001-07-09	1.409931	1.474931	1.380645	1.453503	84366800
2001-07-10	1.482901	1.491472	1.332186	1.353615	98817600
2001-07-11	1.335401	1.443972	1.333258	1.443258	117626600
2001-07-12	1.48408	1.591937	1.48408	1.559794	153700400
2001-07-13	1.53974	1.602598	1.519026	1.591169	113685600
2001-07-16	1.599896	1.61561	1.53061	1.534182	69666800
2001-07-17	1.527177	1.615749	1.457891	1.607177	161957600
2001-07-18	1.401917	1.473346	1.304774	1.331203	284253200
2001-07-19	1.368773	1.382344	1.263058	1.278058	215285000
2001-07-20	1.259338	1.285052	1.244338	1.279338	111146000
2001-07-23	1.290451	1.319737	1.249022	1.251165	60340000
2001-07-24	1.24378	1.281637	1.196637	1.222351	87094000
2001-07-25	1.22908	1.241937	1.146937	1.182652	110969600
2001-07-26	1.182479	1.205336	1.137479	1.190336	92285200
2001-07-27	1.199027	1.234741	1.18117	1.214027	83533800
2001-07-30	1.225677	1.24282	1.182106	1.212106	60839800
2001-07-31	1.237428	1.248142	1.183142	1.203142	58756600
2001-08-01	1.216858	1.271858	1.212572	1.22043	76034000
2001-08-02	1.256951	1.272666	1.229094	1.269094	63022400
2001-08-03	1.276461	1.277176	1.21289	1.248604	46513600
2001-08-06	1.218483	1.262769	1.215626	1.224912	24913000
2001-08-07	1.23831	1.262596	1.21331	1.232596	42137200
2001-08-08	1.235899	1.267328	1.184471	1.210185	69042400
2001-08-09	1.213362	1.226933	1.196219	1.21979	50166200
2001-08-10	1.219298	1.239298	1.187155	1.217869	46740400
2001-08-13	1.223066	1.239494	1.19878	1.222351	36999200
2001-08-14	1.232872	1.2443	1.195014	1.1993	57237600
2001-08-15	1.203588	1.216445	1.163588	1.180731	72319800
2001-08-16	1.167034	1.20132	1.145605	1.194177	72023000
2001-08-17	1.152039	1.184182	1.151325	1.157039	52106600
2001-08-20	1.161669	1.168098	1.138098	1.160241	63075600
2001-08-21	1.163149	1.163149	1.131721	1.147435	46425400
2001-08-22	1.146719	1.168861	1.123147	1.166004	43493800
2001-08-23	1.168249	1.178249	1.123963	1.140392	54269600
2001-08-24	1.14834	1.192626	1.12334	1.189055	72583000
2001-08-27	1.188608	1.238608	1.15718	1.211466	43911000
2001-08-28	1.213883	1.231026	1.178169	1.178169	42933800
2001-08-29	1.185244	1.213101	1.141672	1.141672	59992800
2001-08-30	1.135244	1.166672	1.102387	1.141672	92173200
2001-08-31	1.129203	1.191345	1.123488	1.187774	54226200
2001-09-04	1.186423	1.227851	1.163565	1.168565	87053400
2001-09-05	1.165631	1.216345	1.15706	1.187774	90014400
2001-09-06	1.183201	1.221058	1.129629	1.134629	70592200
2001-09-07	1.122169	1.165026	1.10074	1.106455	60457600
2001-09-10	1.08579	1.121504	1.080075	1.112218	77211400
2001-09-17	1.017172	1.093601	0.997886	1.087886	114501800
2001-09-18	1.08671	1.145281	1.034567	1.042424	81775400
2001-09-19	1.052664	1.095522	0.988379	1.089807	93329600
2001-09-20	1.047576	1.094719	0.991148	1.004005	102793600
2001-09-21	0.940779	1.04435	0.932207	1.007207	142629200
2001-09-24	1.029023	1.081166	1.017595	1.053309	73634400
2001-09-25	1.037898	1.043612	0.98147	0.995041	93601200
2001-09-26	1.017212	1.022926	0.954355	0.970069	123449200
2001-09-27	0.974549	1.010263	0.970977	0.99312	80560200
2001-09-28	1.007406	1.021692	0.984549	0.99312	91277200
2001-10-01	0.99147	1.027184	0.972898	0.995041	52052000
2001-10-02	0.990809	1.01938	0.951523	0.963666	58970800
2001-10-03	0.957041	0.986327	0.94847	0.959184	170760800
2001-10-04	0.978955	1.04324	0.95324	1.016812	100280600
2001-10-05	0.980603	1.034174	0.951317	1.03346	85671600
2001-10-08	0.992302	1.048016	0.987302	1.037302	51996000
2001-10-09	1.028067	1.038781	0.998067	1.024495	43506400
2001-10-10	1.025572	1.079143	1.014858	1.077001	76939800
2001-10-11	1.077337	1.135909	1.072337	1.135909	83540800
2001-10-12	1.103197	1.158197	1.071054	1.153197	71953000
2001-10-15	1.14906	1.179774	1.14906	1.151917	79688000
2001-10-16	1.158911	1.166768	1.136054	1.153197	50737400
2001-10-17	1.184315	1.189315	1.085744	1.087886	71384600
2001-10-18	1.101843	1.168986	1.101843	1.152557	153143200
2001-10-19	1.146053	1.17891	1.141767	1.171767	41697600
2001-10-22	1.160012	1.221441	1.151441	1.217869	97984600
2001-10-23	1.231521	1.25295	1.142236	1.161521	171245200
2001-10-24	1.149816	1.223387	1.127673	1.213387	93606800
2001-10-25	1.175183	1.23304	1.155183	1.228754	63737800
2001-10-26	1.20903	1.236887	1.191887	1.195458	69741000
2001-10-29	1.196009	1.203151	1.126723	1.128866	59795400
2001-10-30	1.111231	1.155516	1.088373	1.126945	69190800
2001-10-31	1.136526	1.184383	1.115811	1.124383	68437600
2001-11-01	1.123193	1.203908	1.094622	1.190336	78248800
2001-11-02	1.185483	1.209769	1.159769	1.189055	49301000
2001-11-05	1.204641	1.233927	1.188213	1.22107	58948400
2001-11-06	1.209515	1.256658	1.1788	1.253086	79004800
2001-11-07	1.245081	1.292938	1.235795	1.254367	95747400
2001-11-08	1.263733	1.282304	1.188019	1.198019	85535800
2001-11-09	1.190161	1.23659	1.18659	1.198019	33573400
2001-11-12	1.194152	1.230581	1.144152	1.200581	50374800
2001-11-13	1.219566	1.241709	1.193138	1.24028	56168000
2001-11-14	1.254219	1.276362	1.22279	1.255647	55287400
2001-11-15	1.245402	1.277545	1.229687	1.245402	53257400
2001-11-16	1.236096	1.237524	1.173953	1.214667	57666000
2001-11-19	1.209191	1.284191	1.206334	1.280619	83147400
2001-11-20	1.271239	1.298382	1.248382	1.250525	69146000
2001-11-21	1.255129	1.268701	1.230129	1.260129	50395800
2001-11-23	1.261088	1.278231	1.251088	1.270374	15001000
2001-11-26	1.266198	1.381198	1.261912	1.368341	115172400
2001-11-27	1.358936	1.381793	1.308936	1.34465	67138400
2001-11-28	1.337413	1.363127	1.305984	1.314556	62652800
2001-11-29	1.32037	1.327512	1.291084	1.307512	50691200
2001-11-30	1.304574	1.37386	1.28886	1.36386	75978000
2001-12-03	1.348567	1.364281	1.31571	1.347852	45291400
2001-12-04	1.337865	1.445723	1.314294	1.434294	95104800
2001-12-05	1.421376	1.540662	1.407804	1.521376	142144800
2001-12-06	1.508626	1.510054	1.412912	1.458626	84733600
2001-12-07	1.437544	1.455401	1.404687	1.443258	50878800
2001-12-10	1.425401	1.475401	1.421115	1.443258	42502600
2001-12-11	1.458166	1.471023	1.385309	1.394594	51368800
2001-12-12	1.403168	1.406739	1.358882	1.376025	48115200
2001-12-13	1.37965	1.383936	1.308936	1.34465	49460600
2001-12-14	1.329876	1.337019	1.284162	1.305591	47471200
2001-12-17	1.304604	1.347461	1.289604	1.320318	43428000
2001-12-18	1.336719	1.368147	1.288862	1.34529	58809800
2001-12-19	1.310063	1.388634	1.302206	1.384349	72489200
2001-12-20	1.375662	1.380662	1.319948	1.32352	55216000
2001-12-21	1.345364	1.383221	1.330364	1.34465	64083600
2001-12-24	1.334844	1.37413	1.334844	1.367701	12657400
2001-12-26	1.366025	1.433882	1.351025	1.376025	36600200
2001-12-27	1.378163	1.42602	1.378163	1.413163	47877200
2001-12-28	1.403357	1.476928	1.402642	1.436214	74781000
2001-12-31	1.445849	1.456563	1.397278	1.402278	34445600
2002-01-02	1.402636	1.491922	1.396207	1.491922	132374200
2002-01-03	1.468421	1.521993	1.451993	1.50985	153001800
2002-01-04	1.491894	1.535465	1.466894	1.516894	102494000
2002-01-07	1.524881	1.544881	1.455595	1.466309	111146000
2002-01-08	1.45774	1.479169	1.437026	1.44774	112509600
2002-01-09	1.468412	1.477698	1.359841	1.38627	81958800
2002-01-10	1.358662	1.375805	1.289377	1.359377	113184400
2002-01-11	1.372138	1.404281	1.31571	1.347852	87200400
2002-01-14	1.344255	1.372112	1.336398	1.354255	103999000
2002-01-15	1.362329	1.393758	1.354472	1.389472	72580200
2002-01-16	1.375563	1.375563	1.310563	1.330563	141723400
2002-01-17	1.402273	1.457988	1.395845	1.439416	165144000
2002-01-18	1.407425	1.450282	1.404567	1.419567	84702800
2002-01-22	1.429299	1.436442	1.397156	1.397156	81828600
2002-01-23	1.38685	1.475421	1.37185	1.473993	110819800
2002-01-24	1.46473	1.507587	1.464015	1.486158	86000600
2002-01-25	1.463006	1.500863	1.446577	1.48872	46478600
2002-01-28	1.499286	1.51	1.450714	1.49	46611600
2002-01-29	1.487909	1.510767	1.461481	1.477195	60081000
2002-01-30	1.469649	1.546078	1.460363	1.542506	117894000
2002-01-31	1.542845	1.58356	1.539274	1.582845	117111400
2002-02-01	1.557996	1.602282	1.557996	1.562996	99576400
2002-02-04	1.549614	1.635328	1.541042	1.623185	130593400
2002-02-05	1.603874	1.667445	1.60316	1.629588	114221800
2002-02-06	1.646072	1.673215	1.542501	1.579644	149394000
2002-02-07	1.580952	1.626667	1.540238	1.555952	86958200
2002-02-08	1.565092	1.582235	1.491521	1.538664	88832800
2002-02-11	1.524493	1.600921	1.510921	1.599493	99650600
2002-02-12	1.578634	1.605776	1.563634	1.582205	56070000
2002-02-13	1.581414	1.617842	1.575699	1.601414	78218000
2002-02-14	1.607305	1.620162	1.559448	1.575162	65042600
2002-02-15	1.57534	1.607483	1.526768	1.53034	65046800
2002-02-19	1.529809	1.537666	1.43838	1.44838	97564600
2002-02-20	1.455322	1.486036	1.425322	1.481036	71360800
2002-02-21	1.478095	1.483809	1.373095	1.376666	111687800
2002-02-22	1.378921	1.471064	1.367492	1.456064	101619000
2002-02-25	1.456006	1.589577	1.421006	1.524577	106712200
2002-02-26	1.532756	1.565613	1.485613	1.515613	65032800
2002-02-27	1.547549	1.569692	1.333263	1.40612	257539800
2002-02-28	1.421615	1.453043	1.364472	1.389472	114234400
2002-03-01	1.392955	1.505097	1.385097	1.501526	87248000
2002-03-04	1.481741	1.576026	1.446026	1.555312	87064600
2002-03-05	1.550934	1.570934	1.497363	1.506648	68675600
2002-03-06	1.499082	1.56051	1.459796	1.541225	56551600
2002-03-07	1.538217	1.571789	1.506075	1.561075	64562400
2002-03-08	1.584717	1.609717	1.553288	1.579003	67443600
2002-03-11	1.571759	1.61033	1.536045	1.604616	65696400
2002-03-12	1.567845	1.584274	1.53856	1.582845	63513800
2002-03-13	1.559546	1.593832	1.543832	1.568118	50191400
2002-03-14	1.554991	1.57642	1.524277	1.564277	54324200
2002-03-15	1.562573	1.598287	1.547573	1.597573	60225200
2002-03-18	1.599126	1.606269	1.554126	1.584126	76139000
2002-03-19	1.57974	1.623312	1.551883	1.591169	60586400
2002-03-20	1.577081	1.611366	1.565652	1.595652	73579800
2002-03-21	1.524746	1.556174	1.481889	1.554031	154088200
2002-03-22	1.551792	1.576078	1.526792	1.542506	50548400
2002-03-25	1.546552	1.54798	1.487266	1.495123	65707600
2002-03-26	1.483595	1.515023	1.469309	1.502166	64460200
2002-03-27	1.494235	1.520664	1.487807	1.502807	31925600
2002-03-28	1.517756	1.530613	1.500613	1.515613	27113800
2002-04-01	1.489055	1.583341	1.481912	1.566198	49761600
2002-04-02	1.536225	1.557653	1.526939	1.541225	50948800
2002-04-03	1.542164	1.573593	1.510021	1.520736	53632600
2002-04-04	1.506514	1.605086	1.506514	1.594371	84624400
2002-04-05	1.599126	1.616269	1.538412	1.584126	69587000
2002-04-08	1.544029	1.581172	1.516886	1.572601	65378600
2002-04-09	1.578146	1.607431	1.536717	1.543146	47882800
2002-04-10	1.54686	1.599717	1.532574	1.579003	56245000
2002-04-11	1.603953	1.616096	1.583953	1.59181	101813600
2002-04-12	1.601045	1.612473	1.569616	1.604616	80060400
2002-04-15	1.60506	1.611489	1.586489	1.600774	74842600
2002-04-16	1.606015	1.666015	1.603872	1.648157	153644400
2002-04-17	1.658992	1.676135	1.619706	1.671849	99062600
2002-04-18	1.633456	1.634884	1.58917	1.627027	100427600
2002-04-19	1.635921	1.635921	1.595921	1.599493	93851800
2002-04-22	1.592823	1.599251	1.549251	1.57068	67356800
2002-04-23	1.573465	1.590608	1.541322	1.552751	58367400
2002-04-24	1.559873	1.574159	1.515588	1.522016	35112000
2002-04-25	1.504427	1.560141	1.503713	1.544427	48550600
2002-04-26	1.564068	1.570496	1.472639	1.473353	76245400
2002-04-29	1.477039	1.541324	1.472039	1.534182	68072200
2002-04-30	1.526889	1.561889	1.516889	1.554031	70240800
2002-05-01	1.557606	1.557606	1.491177	1.535463	53676000
2002-05-02	1.525465	1.563322	1.510465	1.516894	59836000
2002-05-03	1.509653	1.541796	1.499653	1.505368	57695400
2002-05-06	1.500301	1.511015	1.43673	1.450301	62416200
2002-05-07	1.472347	1.473062	1.415205	1.438776	60687200
2002-05-08	1.476864	1.57115	1.465435	1.560435	109170600
2002-05-09	1.553195	1.560338	1.521052	1.548909	56154000
2002-05-10	1.562488	1.562488	1.468917	1.493202	58849000
2002-05-13	1.502901	1.543615	1.461472	1.532901	66402000
2002-05-14	1.556976	1.644833	1.540547	1.639833	131626600
2002-05-15	1.625132	1.668703	1.587275	1.618703	83956600
2002-05-16	1.603506	1.631363	1.581363	1.61422	56763000
2002-05-17	1.635699	1.656414	1.572842	1.601414	59123400
2002-05-20	1.571983	1.597697	1.569126	1.584126	67478600
2002-05-21	1.600023	1.612166	1.497881	1.502166	70247800
2002-05-22	1.489376	1.560804	1.485804	1.557233	72718800
2002-05-23	1.560158	1.616586	1.533015	1.6123	92349600
2002-05-24	1.606347	1.606347	1.532776	1.546347	41543600
2002-05-28	1.514749	1.551177	1.496177	1.535463	37429000
2002-05-29	1.531177	1.56832	1.497606	1.535463	55448400
2002-05-30	1.518835	1.562407	1.500264	1.549549	49093800
2002-05-31	1.54835	1.559779	1.490493	1.491922	91373800
2002-06-03	1.501234	1.50552	1.443377	1.466949	58777600
2002-06-04	1.465769	1.477197	1.415769	1.458626	86955400
2002-06-05	1.46264	1.46264	1.428355	1.454783	69270600
2002-06-06	1.476069	1.495355	1.410355	1.418926	64999200
2002-06-07	1.395978	1.408835	1.336692	1.370263	153094200
2002-06-10	1.375385	1.401099	1.365385	1.375385	69393800
2002-06-11	1.394359	1.398645	1.306502	1.310074	87374000
2002-06-12	1.309239	1.333525	1.275668	1.286382	132179600
2002-06-13	1.285451	1.287594	1.239737	1.251165	88020800
2002-06-14	1.225594	1.305594	1.144879	1.287022	106225000
2002-06-17	1.293767	1.321624	1.26591	1.315196	81152400
2002-06-18	1.309509	1.321652	1.278081	1.290224	88340000
2002-06-19	1.114067	1.130496	1.079067	1.09621	427366800
2002-06-20	1.099856	1.13057	1.076998	1.09557	99159200
2002-06-21	1.087494	1.124637	1.074637	1.078922	111294400
2002-06-24	1.0701	1.138672	1.0651	1.105814	107983400
2002-06-25	1.116062	1.136062	1.077491	1.097491	75300400
2002-06-26	1.077569	1.112569	1.018998	1.059712	139738200
2002-06-27	1.073083	1.107368	1.046654	1.092368	62914600
2002-06-28	1.090344	1.141772	1.083201	1.134629	67464600
2002-07-01	1.138797	1.15094	1.091654	1.092368	55672400
2002-07-02	1.091113	1.100398	1.076827	1.084684	76297200
2002-07-03	1.070886	1.133029	1.066601	1.123743	49757400
2002-07-05	1.126369	1.200655	1.126369	1.19994	40412400
2002-07-08	1.189625	1.196054	1.129625	1.153197	52801000
2002-07-09	1.162463	1.176749	1.117463	1.122463	56687400
2002-07-10	1.136873	1.16973	1.104016	1.109016	51720200
2002-07-11	1.097481	1.175338	1.076767	1.171767	93419200
2002-07-12	1.195468	1.212611	1.103325	1.121182	110873000
2002-07-15	1.110141	1.193712	1.065855	1.167284	73998400
2002-07-16	1.164308	1.194308	1.125736	1.143593	111692000
2002-07-17	1.036518	1.041518	0.969375	1.000804	303871400
2002-07-18	0.996253	1.000539	0.942681	0.959824	139865600
2002-07-19	0.939332	0.972903	0.927189	0.957903	96301800
2002-07-22	0.943199	0.974628	0.933199	0.955342	107724400
2002-07-23	0.957243	0.973671	0.924386	0.926528	99972600
2002-07-24	0.911128	0.9747	0.905414	0.973271	101648400
2002-07-25	0.960199	0.961627	0.894484	0.919484	119838600
2002-07-26	0.926775	0.931775	0.879632	0.918204	51926000
2002-07-29	0.923174	0.967459	0.915317	0.961745	68740000
2002-07-30	0.946569	0.993712	0.925855	0.987998	88709600
2002-07-31	0.987112	0.988541	0.951398	0.977112	77674800
2002-08-01	0.969801	0.991944	0.942658	0.947658	57239000
2002-08-02	0.945961	0.964533	0.910961	0.925247	44765000
2002-08-05	0.932936	0.946507	0.894364	0.895793	51006200
2002-08-06	0.90596	0.978817	0.896674	0.943817	68013400
2002-08-07	0.966671	0.985957	0.913814	0.962385	83368600
2002-08-08	0.941817	0.985388	0.941817	0.979674	56837200
2002-08-09	0.978321	0.978321	0.942606	0.960464	51429000
2002-08-12	0.953396	0.961967	0.938396	0.959824	44941400
2002-08-13	0.956355	0.978498	0.931355	0.934212	67467400
2002-08-14	0.935635	0.984207	0.926349	0.971349	99771000
2002-08-15	0.973809	1.009523	0.956666	0.999523	80519600
2002-08-16	0.986615	1.033044	0.974473	1.01233	61306000
2002-08-19	1.008929	1.0425	1.004643	1.023215	54139400
2002-08-20	1.023018	1.03159	0.99159	1.018733	46656400
2002-08-21	1.024321	1.04075	0.984321	1.032179	50607200
2002-08-22	1.039004	1.042575	1.000432	1.022575	64577800
2002-08-23	1.01935	1.021493	0.987207	1.007207	40811400
2002-08-26	1.024401	1.024401	0.967972	0.994401	47492200
2002-08-27	1.012289	1.014432	0.94086	0.95086	65557800
2002-08-28	0.948398	0.971255	0.937684	0.941255	61993400
2002-08-29	0.937684	0.968398	0.927684	0.941255	41042400
2002-08-30	0.943029	0.972315	0.932315	0.944457	48379800
2002-09-03	0.931064	0.93535	0.899635	0.899635	69234200
2002-09-04	0.907168	0.948596	0.905025	0.927168	105165200
2002-09-05	0.910816	0.920816	0.898673	0.907959	56544600
2002-09-06	0.930051	0.940051	0.910051	0.920765	45397800
2002-09-09	0.913696	0.931553	0.90441	0.920125	39561200
2002-09-10	0.923279	0.928993	0.902564	0.917564	62367200
2002-09-11	0.918574	0.937145	0.905002	0.915002	50603000
2002-09-12	0.909684	0.931827	0.903969	0.905398	67457600
2002-09-13	0.904462	0.919462	0.898747	0.907319	70737800
2002-09-16	0.902735	0.936306	0.901306	0.928449	71660400
2002-09-17	0.931229	0.964086	0.931229	0.947658	106999200
2002-09-18	0.938174	0.966745	0.926031	0.961745	82160400
2002-09-19	0.945713	0.949285	0.926428	0.933571	51486400
2002-09-20	0.934283	0.95714	0.92714	0.95214	88197200
2002-09-23	0.944432	0.958717	0.922289	0.95086	65927400
2002-09-24	0.92027	0.95027	0.92027	0.937413	62665400
2002-09-25	0.938839	0.973124	0.935982	0.955982	63670600
2002-09-26	0.969826	0.976255	0.930541	0.941255	52161200
2002-09-27	0.926107	0.951821	0.925393	0.942536	51538200
2002-09-30	0.921306	0.933449	0.902735	0.928449	59424400
2002-10-01	0.934803	0.935517	0.89266	0.929089	85605800
2002-10-02	0.918747	0.940176	0.902319	0.907319	57337000
2002-10-03	0.907071	0.937071	0.8985	0.915643	54474000
2002-10-04	0.921925	0.924782	0.895497	0.898354	47706400
2002-10-07	0.895992	0.913135	0.880992	0.881706	61174400
2002-10-08	0.891658	0.895944	0.853087	0.875944	113411200
2002-10-09	0.86661	0.888753	0.857324	0.870181	89171600
2002-10-10	0.869191	0.911334	0.86562	0.903477	80393600
2002-10-11	0.910517	0.948374	0.899803	0.929089	73669400
2002-10-14	0.930023	0.960737	0.922166	0.945737	48601000
2002-10-15	0.974995	0.977138	0.943566	0.970709	101379600
2002-10-16	0.95372	0.973005	0.885148	0.932291	76906200
2002-10-17	0.91062	0.922763	0.894191	0.903477	117324200
2002-10-18	0.893918	0.918918	0.888918	0.918204	72074800
2002-10-21	0.910862	0.937291	0.892291	0.932291	59630200
2002-10-22	0.924826	0.954112	0.909826	0.941255	54537000
2002-10-23	0.934924	0.959924	0.925638	0.952781	52259200
2002-10-24	0.964186	0.977758	0.930615	0.940615	43687000
2002-10-25	0.935215	0.9895	0.928072	0.987358	69767600
2002-10-28	0.995237	1.023809	0.973809	0.999523	87325000
2002-10-29	0.997924	1.020067	0.954352	0.988638	64794800
2002-10-30	0.988215	1.051072	0.9875	1.023215	67669000
2002-10-31	1.023263	1.055406	1.018263	1.028977	73959200
2002-11-01	1.017547	1.057547	1.013976	1.047547	47457200
2002-11-04	1.053625	1.116483	1.042911	1.081483	94204600
2002-11-05	1.071409	1.086409	1.042837	1.082123	52673600
2002-11-06	1.092613	1.109756	1.06547	1.102613	54097400
2002-11-07	1.091638	1.103067	1.010924	1.024495	84044800
2002-11-08	1.026392	1.039964	0.991392	1.01425	47516000
2002-11-11	1.012138	1.022852	0.967852	0.970709	38243800
2002-11-12	0.978587	1.030015	0.97573	1.001444	55948200
2002-11-13	0.991815	1.032529	0.976101	0.998243	57934800
2002-11-14	1.015133	1.051562	1.006562	1.043705	35428400
2002-11-15	1.041294	1.042008	1.007722	1.021294	40248600
2002-11-18	1.040656	1.04137	0.992798	1.002084	41144600
2002-11-19	0.997753	1.012039	0.959182	0.977753	52738000
2002-11-20	0.977972	1.006544	0.974401	0.994401	52185000
2002-11-21	1.014763	1.053335	1.004049	1.046906	104620600
2002-11-22	1.030851	1.045851	1.017279	1.025136	56964600
2002-11-25	1.026861	1.034718	1.004004	1.022575	49856800
2002-11-26	1.018147	1.021718	0.976718	0.986718	60065600
2002-11-27	0.997996	1.016567	0.987281	1.006567	71699600
2002-11-29	1.013194	1.019623	0.986051	0.99248	35858200
2002-12-02	1.023418	1.037704	0.959847	0.97199	99685600
2002-12-03	0.973566	0.983566	0.966423	0.970709	56967400
2002-12-04	0.973543	0.974257	0.924971	0.958543	81439400
2002-12-05	0.965344	0.968916	0.92963	0.936773	60849600
2002-12-06	0.935835	0.974406	0.926549	0.957263	61339600
2002-12-09	0.958029	0.958743	0.938743	0.944457	59021200
2002-12-10	0.940535	0.990535	0.939107	0.978393	77152600
2002-12-11	0.978268	0.99184	0.962554	0.99184	63375200
2002-12-12	0.995487	0.998344	0.959773	0.97263	37335200
2002-12-13	0.972018	0.972732	0.937018	0.947018	41195000
2002-12-16	0.948003	0.968717	0.933717	0.95086	62906200
2002-12-17	0.949158	0.973444	0.935587	0.965587	55665400
2002-12-18	0.94936	0.953646	0.927931	0.932931	37675400
2002-12-19	0.932811	0.960668	0.902097	0.90924	86879800
2002-12-20	0.916112	0.935398	0.879684	0.905398	79524200
2002-12-23	0.904238	0.932095	0.90138	0.927809	31456600
2002-12-24	0.925199	0.927341	0.915199	0.919484	9835000
2002-12-26	0.923475	0.951332	0.913475	0.922046	21355600
2002-12-27	0.918132	0.923132	0.896703	0.900275	20008800
2002-12-30	0.90163	0.90663	0.884487	0.900916	38760400
2002-12-31	0.893993	0.919707	0.890422	0.917564	50181600
2003-01-02	0.916229	0.956229	0.915515	0.947658	45357200
2003-01-03	0.946918	0.956204	0.931918	0.954061	36863400
2003-01-06	0.963346	0.988346	0.952632	0.954061	97633200
2003-01-07	0.946575	0.961575	0.923717	0.95086	85586200
2003-01-08	0.933794	0.943079	0.923794	0.931651	57411200
2003-01-09	0.93569	0.957118	0.927118	0.939975	53813200
2003-01-10	0.932536	0.949678	0.926107	0.942536	43775200
2003-01-13	0.956059	0.956059	0.917487	0.936773	44735600
2003-01-14	0.941207	0.950492	0.926921	0.935492	46715200
2003-01-15	0.935396	0.943253	0.911824	0.923967	92782200
2003-01-16	0.906847	0.946133	0.906847	0.936133	139767600
2003-01-17	0.935694	0.935694	0.901408	0.902837	66690400
2003-01-21	0.911285	0.925571	0.896285	0.897714	63364000
2003-01-22	0.895892	0.908035	0.883035	0.88875	53785200
2003-01-23	0.898747	0.92089	0.891605	0.907319	57064000
2003-01-24	0.915056	0.915056	0.866484	0.883627	76367200
2003-01-27	0.872614	0.931185	0.870471	0.904757	97851600
2003-01-28	0.909285	0.941428	0.903571	0.933571	71563800
2003-01-29	0.928839	0.968124	0.910982	0.955982	93261000
2003-01-30	0.964066	0.970495	0.91478	0.916923	101764600
2003-01-31	0.907341	0.933056	0.897341	0.919484	85306200
2003-02-03	0.920837	0.956551	0.916551	0.938694	66196200
2003-02-04	0.924138	0.938424	0.914138	0.934852	79353400
2003-02-05	0.943818	0.959533	0.924533	0.925247	55403600
2003-02-06	0.918967	0.935396	0.908967	0.923967	44787400
2003-02-07	0.93461	0.938181	0.900324	0.906038	67425400
2003-02-10	0.912415	0.934558	0.89813	0.918844	41972000
2003-02-11	0.929558	0.938844	0.90813	0.918844	41195000
2003-02-12	0.912835	0.936406	0.912835	0.921406	57171800
2003-02-13	0.921725	0.938153	0.909582	0.93101	52123400
2003-02-14	0.935048	0.942906	0.916477	0.939334	60824400
2003-02-18	0.94061	0.979896	0.938468	0.977753	72724400
2003-02-19	0.966575	0.972289	0.938717	0.95086	60092200
2003-02-20	0.951451	0.959308	0.941451	0.945737	56088200
2003-02-21	0.947606	0.964749	0.935464	0.960464	39361000
2003-02-24	0.952389	0.964531	0.876674	0.943817	45063200
2003-02-25	0.937459	0.966031	0.930317	0.961745	47160400
2003-02-26	0.963449	0.965592	0.927021	0.928449	54273800
2003-02-27	0.930785	0.9615	0.9265	0.9515	38585400
2003-02-28	0.950391	0.966819	0.943962	0.961105	48774600
2003-03-03	0.963768	0.974482	0.930911	0.938054	50940400
2003-03-04	0.945148	0.950148	0.92372	0.932291	31603600
2003-03-05	0.935418	0.94899	0.92899	0.936133	31670800
2003-03-06	0.93372	0.935148	0.920862	0.932291	24964800
2003-03-07	0.926084	0.943227	0.914656	0.93037	50246000
2003-03-10	0.930125	0.941553	0.915125	0.920125	33643400
2003-03-11	0.920446	0.929732	0.903303	0.911161	40297600
2003-03-12	0.906949	0.922663	0.899092	0.91052	55640200
2003-03-13	0.924678	0.94825	0.90325	0.942536	83861400
2003-03-14	0.939235	0.962807	0.936378	0.946378	38274600
2003-03-17	0.952533	0.965391	0.939676	0.961105	99978200
2003-03-18	0.960464	0.966892	0.947606	0.960464	57495200
2003-03-19	0.965835	0.971549	0.945835	0.957263	35329000
2003-03-20	0.956131	0.960416	0.932559	0.954702	40794600
2003-03-21	0.966892	0.971178	0.947606	0.960464	74487000
2003-03-24	0.941553	0.950839	0.918696	0.920125	40275200
2003-03-25	0.921651	0.951651	0.918794	0.931651	41924400
2003-03-26	0.932686	0.9334	0.914829	0.922686	44585800
2003-03-27	0.915666	0.942809	0.915666	0.927809	30598400
2003-03-28	0.920788	0.936503	0.918646	0.932931	36325800
2003-03-31	0.918969	0.933255	0.898255	0.905398	64164800
2003-04-01	0.909536	0.917393	0.90025	0.906679	38585400
2003-04-02	0.917709	0.941281	0.911281	0.934852	42842800
2003-04-03	0.933031	0.943031	0.918031	0.925888	36428000
2003-04-04	0.930543	0.941257	0.921257	0.922686	36505000
2003-04-07	0.953523	0.960666	0.922095	0.927809	49215600
2003-04-08	0.929533	0.939533	0.918818	0.925247	32233600
2003-04-09	0.932171	0.939314	0.905028	0.908599	36681400
2003-04-10	0.907982	0.921553	0.907982	0.920125	26775000
2003-04-11	0.905923	0.933781	0.825923	0.845209	348177200
2003-04-14	0.878827	0.881684	0.863827	0.869541	125739600
2003-04-15	0.871659	0.872374	0.850945	0.857374	75992000
2003-04-16	0.829913	0.878485	0.824913	0.84777	254044000
2003-04-17	0.8458	0.849372	0.811514	0.840086	154064400
2003-04-21	0.840653	0.844939	0.829939	0.841367	38080000
2003-04-22	0.841487	0.872915	0.835058	0.865058	75142200
2003-04-23	0.86597	0.873112	0.853827	0.869541	52420200
2003-04-24	0.86629	0.872719	0.829147	0.860576	81277000
2003-04-25	0.862671	0.871242	0.846242	0.854813	51329600
2003-04-28	0.860326	0.894612	0.856755	0.887469	159199600
2003-04-29	0.89456	0.907418	0.865989	0.900275	114559200
2003-04-30	0.889806	0.919806	0.884092	0.91052	114543800
2003-05-01	0.911627	0.921627	0.89377	0.919484	85689800
2003-05-02	0.925961	0.935247	0.91739	0.925247	80295600
2003-05-05	0.935972	1.086686	0.934543	1.030258	388927000
2003-05-06	1.021971	1.149113	1.020542	1.120542	378623000
2003-05-07	1.10729	1.17229	1.091576	1.130147	263594800
2003-05-08	1.131129	1.157557	1.101843	1.152557	171934000
2003-05-09	1.17391	1.17891	1.141767	1.171767	147096600
2003-05-12	1.15913	1.201272	1.157701	1.188415	104843200
2003-05-13	1.178316	1.216887	1.14403	1.195458	111699000
2003-05-14	1.207774	1.208488	1.179203	1.187774	88872000
2003-05-15	1.190014	1.207872	1.180729	1.1993	71248800
2003-05-16	1.188782	1.218782	1.166639	1.203782	85407000
2003-05-19	1.189675	1.198247	1.156104	1.158961	111472200
2003-05-20	1.161254	1.16554	1.12554	1.139111	104055000
2003-05-21	1.138666	1.160095	1.130095	1.142952	76252400
2003-05-22	1.142925	1.179354	1.132211	1.167925	44615200
2003-05-23	1.16519	1.183047	1.147333	1.173047	51679600
2003-05-27	1.14319	1.210333	1.139619	1.208904	72532600
2003-05-28	1.186201	1.197629	1.161201	1.170486	84919800
2003-05-29	1.172533	1.187533	1.144675	1.158961	83441400
2003-05-30	1.161499	1.165784	1.119356	1.149356	95687200
2003-06-02	1.163768	1.17734	1.104482	1.11734	104647200
2003-06-03	1.117661	1.13409	1.087661	1.108376	90214600
2003-06-04	1.105516	1.140516	1.094088	1.126945	67800600
2003-06-05	1.115935	1.136649	1.107363	1.129506	51374400
2003-06-06	1.140274	1.161702	1.097417	1.098131	60347000
2003-06-09	1.085794	1.092937	1.063651	1.07508	64988000
2003-06-10	1.079338	1.107909	1.069338	1.100052	44161600
2003-06-11	1.095911	1.121625	1.071625	1.11734	56278600
2003-06-12	1.122115	1.145687	1.114973	1.13783	63147000
2003-06-13	1.13899	1.153276	1.094704	1.115419	47811400
2003-06-16	1.121989	1.169846	1.111275	1.169846	59631600
2003-06-17	1.180437	1.186866	1.150437	1.164723	44366000
2003-06-18	1.176415	1.249987	1.166415	1.224272	113745800
2003-06-19	1.241267	1.259124	1.199124	1.225553	95382000
2003-06-20	1.240109	1.256537	1.207966	1.229395	89136600
2003-06-23	1.237572	1.26543	1.198287	1.22043	76840400
2003-06-24	1.251786	1.266072	1.198215	1.202501	128595600
2003-06-25	1.205923	1.244494	1.195209	1.222351	82453000
2003-06-26	1.193014	1.2373	1.193014	1.235157	40426400
2003-06-27	1.240014	1.240729	1.181443	1.1993	91448000
2003-06-30	1.193287	1.231144	1.186858	1.22043	55538000
2003-07-01	1.206637	1.22878	1.180923	1.222351	45248000
2003-07-02	1.216734	1.243162	1.216019	1.233877	81324600
2003-07-03	1.215626	1.254912	1.214197	1.224912	34442800
2003-07-07	1.229438	1.294438	1.219438	1.272295	71568000
2003-07-08	1.243374	1.313374	1.241231	1.306231	64184400
2003-07-09	1.296433	1.313576	1.273576	1.273576	53411400
2003-07-10	1.275155	1.279441	1.238726	1.253726	42733600
2003-07-11	1.257443	1.281728	1.248157	1.271014	34214600
2003-07-14	1.282073	1.30993	1.272073	1.274216	47101600
2003-07-15	1.284933	1.300647	1.24279	1.255647	51661400
2003-07-16	1.279438	1.28158	1.237295	1.272295	62732600
2003-07-17	1.287533	1.341819	1.283247	1.338247	187803000
2003-07-18	1.338543	1.358543	1.302829	1.335686	74709600
2003-07-21	1.325392	1.333249	1.297535	1.319678	45952200
2003-07-22	1.336844	1.343273	1.310416	1.331844	49606200
2003-07-23	1.342632	1.343346	1.307632	1.331203	35758800
2003-07-24	1.351132	1.383989	1.303989	1.313275	57309000
2003-07-25	1.298513	1.38137	1.297799	1.379227	54171600
2003-07-28	1.380438	1.380438	1.334724	1.34401	42589400
2003-07-29	1.346008	1.352436	1.312436	1.326722	49280000
2003-07-30	1.333548	1.342834	1.290691	1.298548	43398600
2003-07-31	1.325487	1.369058	1.313344	1.349772	75366200
2003-08-01	1.346648	1.365934	1.320934	1.327362	37401000
2003-08-04	1.309526	1.378811	1.291668	1.358097	57528800
2003-08-05	1.374237	1.377808	1.284951	1.304951	62360200
2003-08-06	1.287642	1.295499	1.247642	1.256928	61366200
2003-08-07	1.261852	1.287566	1.239709	1.276137	43594600
2003-08-08	1.29114	1.292568	1.254711	1.257568	34414800
2003-08-11	1.270277	1.278134	1.248134	1.258849	34307000
2003-08-12	1.265696	1.268553	1.244267	1.26141	41109600
2003-08-13	1.269287	1.303573	1.249287	1.292145	71024800
2003-08-14	1.29584	1.304412	1.276555	1.278698	48195000
2003-08-15	1.284194	1.287765	1.25848	1.262051	31466400
2003-08-18	1.268104	1.30739	1.258104	1.30239	48193600
2003-08-19	1.30468	1.310394	1.278251	1.301109	33422200
2003-08-20	1.286005	1.363862	1.283147	1.34529	68303200
2003-08-21	1.341763	1.390334	1.336049	1.388191	63831600
2003-08-22	1.403395	1.416967	1.319824	1.336967	62566000
2003-08-25	1.329972	1.339257	1.309257	1.335686	34445600
2003-08-26	1.326424	1.349281	1.297852	1.347852	41239800
2003-08-27	1.33467	1.375385	1.316813	1.375385	56425600
2003-08-28	1.359418	1.42299	1.359418	1.420847	79906400
2003-08-29	1.418454	1.464883	1.40774	1.44774	65788800
2003-09-02	1.449535	1.466678	1.430964	1.463107	60533200
2003-09-03	1.458796	1.495939	1.455939	1.469511	67207000
2003-09-04	1.485399	1.491827	1.457542	1.461827	49945000
2003-09-05	1.457124	1.487124	1.434267	1.440696	60033400
2003-09-08	1.437492	1.459635	1.436778	1.456064	41811000
2003-09-09	1.443801	1.453801	1.414515	1.432372	45092600
2003-09-10	1.425207	1.450921	1.415207	1.420207	56222600
2003-09-11	1.422395	1.460966	1.41168	1.444538	53421200
2003-09-12	1.436972	1.481972	1.422686	1.479115	44997400
2003-09-15	1.464985	1.471413	1.415699	1.422128	56711200
2003-09-16	1.421018	1.455303	1.420303	1.431732	67251800
2003-09-17	1.434222	1.434936	1.397079	1.416365	72349200
2003-09-18	1.409313	1.472885	1.398599	1.465028	63226800
2003-09-19	1.467248	1.479391	1.435105	1.445819	51489200
2003-09-22	1.420947	1.443804	1.402375	1.413804	44955400
2003-09-23	1.406928	1.438357	1.396928	1.436214	33112800
2003-09-24	1.428712	1.435854	1.347997	1.36514	75321400
2003-09-25	1.373153	1.375296	1.295296	1.308153	143595200
2003-09-26	1.296943	1.396943	1.286229	1.3248	86812600
2003-09-29	1.377431	1.390288	1.317431	1.36386	91425600
2003-09-30	1.353151	1.362436	1.306722	1.326722	71356600
2003-10-01	1.325489	1.353346	1.288346	1.331203	59028200
2003-10-02	1.333545	1.333545	1.296402	1.317117	51014600
2003-10-03	1.338831	1.400974	1.330974	1.388831	74900000
2003-10-06	1.382964	1.430107	1.376536	1.42725	67082400
2003-10-07	1.403228	1.500371	1.393228	1.486799	104543600
2003-10-08	1.490125	1.51084	1.452982	1.476554	107167200
2003-10-09	1.490812	1.51724	1.454383	1.501526	86937200
2003-10-10	1.503395	1.525538	1.49411	1.516253	43709400
2003-10-13	1.514868	1.563439	1.514154	1.559154	69966400
2003-10-14	1.555532	1.585532	1.546246	1.57196	68854800
2003-10-15	1.591391	1.60282	1.572105	1.589248	152525800
2003-10-16	1.528006	1.530863	1.42872	1.48872	243920600
2003-10-17	1.501704	1.509561	1.433847	1.456704	89952800
2003-10-20	1.442514	1.495371	1.426799	1.486799	69783000
2003-10-21	1.493524	1.499953	1.453524	1.484238	44115400
2003-10-22	1.470202	1.488774	1.451631	1.457345	40399800
2003-10-23	1.4535	1.4835	1.4435	1.472072	41302800
2003-10-24	1.444243	1.464957	1.420671	1.4471	54964000
2003-10-27	1.457814	1.467814	1.439243	1.4471	40503400
2003-10-28	1.435957	1.522385	1.424528	1.518814	62928600
2003-10-29	1.504037	1.531894	1.491894	1.516894	66770200
2003-10-30	1.54276	1.543475	1.46276	1.478475	65139200
2003-10-31	1.494955	1.498526	1.457812	1.465669	54538400
2003-11-03	1.45946	1.493032	1.455889	1.482317	75710600
2003-11-04	1.478377	1.48052	1.444091	1.466949	62308400
2003-11-05	1.459633	1.481776	1.434633	1.474633	80617600
2003-11-06	1.465396	1.482538	1.446824	1.480396	99268400
2003-11-07	1.489982	1.493553	1.437124	1.440696	52536400
2003-11-10	1.441563	1.455849	1.397992	1.402278	58569000
2003-11-11	1.404942	1.413513	1.374942	1.379227	53768400
2003-11-12	1.369097	1.457668	1.369097	1.429811	75000800
2003-11-13	1.410574	1.445574	1.399859	1.435574	53193000
2003-11-14	1.446961	1.456247	1.361247	1.374104	59262000
2003-11-17	1.368688	1.370117	1.340117	1.352974	57064000
2003-11-18	1.364015	1.373301	1.302586	1.306872	66798200
2003-11-19	1.317512	1.323941	1.296084	1.307512	86146200
2003-11-20	1.284951	1.354951	1.284951	1.304951	59897600
2003-11-21	1.302834	1.319977	1.267834	1.298548	60459000
2003-11-24	1.307827	1.362827	1.304255	1.354255	95456200
2003-11-25	1.363446	1.364874	1.31916	1.32416	67163600
2003-11-26	1.338865	1.357436	1.293151	1.326722	61282200
2003-11-28	1.329602	1.350316	1.31103	1.338887	19024600
2003-12-01	1.342255	1.400112	1.339398	1.390112	90384000
2003-12-02	1.383513	1.404942	1.369942	1.379227	51324000
2003-12-03	1.382999	1.404428	1.341571	1.346571	47824000
2003-12-04	1.339255	1.355684	1.327112	1.354255	44485000
2003-12-05	1.338616	1.356473	1.326473	1.335045	46544400
2003-12-08	1.328567	1.349995	1.302138	1.347852	37059400
2003-12-09	1.360862	1.366576	1.305862	1.309433	33786200
2003-12-10	1.309951	1.32138	1.274951	1.304951	67834200
2003-12-11	1.289526	1.367383	1.286668	1.358097	45784200
2003-12-12	1.368321	1.368321	1.324035	1.337607	48168400
2003-12-15	1.38579	1.38579	1.284361	1.291504	97227200
2003-12-16	1.293303	1.314731	1.280446	1.288303	93489200
2003-12-17	1.287222	1.290793	1.266507	1.272936	68565000
2003-12-18	1.27318	1.29318	1.27318	1.28318	82728800
2003-12-19	1.29641	1.312838	1.255696	1.26141	113390200
2003-12-22	1.256728	1.273871	1.228157	1.271014	94266200
2003-12-23	1.27631	1.278453	1.253453	1.268453	77124600
2003-12-24	1.257586	1.319729	1.252586	1.306872	44368800
2003-12-26	1.299848	1.339848	1.299134	1.330563	25923800
2003-12-29	1.337112	1.35497	1.333541	1.354255	58364600
2003-12-30	1.355436	1.378293	1.353293	1.362579	51213400
2003-12-31	1.366912	1.379769	1.354769	1.368341	43612800
2004-01-02	1.381865	1.39615	1.355436	1.362579	36160600
2004-01-05	1.365996	1.435282	1.365996	1.419567	98754600
2004-01-06	1.425873	1.438016	1.387301	1.414444	127337000
2004-01-07	1.41146	1.463603	1.399318	1.44646	146718600
2004-01-08	1.458622	1.522193	1.44505	1.495764	115075800
2004-01-09	1.489141	1.553426	1.457712	1.472712	106864800
2004-01-12	1.485169	1.538741	1.474455	1.519455	121886800
2004-01-13	1.585856	1.595856	1.525856	1.544427	169754200
2004-01-14	1.563835	1.573835	1.519549	1.549549	155010800
2004-01-15	1.467393	1.502393	1.438107	1.463107	254552200
2004-01-16	1.466926	1.47764	1.446926	1.454783	93205000
2004-01-20	1.451139	1.460424	1.421139	1.455424	78986600
2004-01-21	1.454169	1.473454	1.434883	1.44774	56665000
2004-01-22	1.44735	1.466635	1.420207	1.420207	51251200
2004-01-23	1.434538	1.457395	1.422395	1.444538	56792400
2004-01-26	1.434068	1.476925	1.431925	1.473353	67817400
2004-01-27	1.475052	1.490052	1.457909	1.477195	76767600
2004-01-28	1.464835	1.503406	1.43412	1.441977	68850600
2004-01-29	1.448651	1.460793	1.417222	1.452222	53174800
2004-01-30	1.450966	1.46668	1.434538	1.444538	46324600
2004-02-02	1.439171	1.464171	1.412028	1.429171	71857800
2004-02-03	1.428186	1.435329	1.406758	1.425329	45203200
2004-02-04	1.410235	1.416663	1.388806	1.395235	76388200
2004-02-05	1.392716	1.470574	1.392002	1.435574	88211200
2004-02-06	1.435571	1.467	1.432	1.454143	48335000
2004-02-09	1.44801	1.465153	1.439439	1.451582	47065200
2004-02-10	1.445716	1.481431	1.432859	1.471431	63835800
2004-02-11	1.473223	1.528937	1.470366	1.523937	87136000
2004-02-12	1.510884	1.538026	1.510169	1.519455	45997000
2004-02-13	1.533426	1.551284	1.460569	1.472712	78995000
2004-02-17	1.478671	1.506528	1.478671	1.482957	42739200
2004-02-18	1.483645	1.502217	1.47436	1.48936	35408800
2004-02-19	1.500205	1.522347	1.43449	1.438776	80770200
2004-02-20	1.441437	1.442151	1.420723	1.434294	69400800
2004-02-23	1.431561	1.440133	1.399418	1.420847	48519800
2004-02-24	1.416018	1.458875	1.406018	1.431732	64764000
2004-02-25	1.422689	1.466974	1.417689	1.460546	69069000
2004-02-26	1.463846	1.485274	1.458131	1.475274	49602000
2004-02-27	1.46305	1.538764	1.462336	1.531621	117209400
2004-03-01	1.543739	1.558024	1.52731	1.538024	80420200
2004-03-02	1.538149	1.545292	1.52172	1.524577	64171800
2004-03-03	1.508764	1.550907	1.508764	1.531621	56282800
2004-03-04	1.523162	1.615305	1.521733	1.611019	165055800
2004-03-05	1.584331	1.765759	1.580759	1.712188	385149800
2004-03-08	1.709091	1.721233	1.650519	1.664805	130718000
2004-03-09	1.649525	1.744525	1.638811	1.735239	154590800
2004-03-10	1.726663	1.805234	1.71952	1.772377	251741000
2004-03-11	1.747012	1.802012	1.734155	1.738441	148962800
2004-03-12	1.747551	1.780408	1.736836	1.764693	82306000
2004-03-15	1.735047	1.757904	1.680047	1.693619	120429400
2004-03-16	1.705423	1.709708	1.622565	1.65328	151358200
2004-03-17	1.660543	1.690543	1.647686	1.676971	102858000
2004-03-18	1.662961	1.671533	1.637961	1.643675	80270400
2004-03-19	1.634412	1.732984	1.632984	1.655841	102144000
2004-03-22	1.620841	1.677984	1.612269	1.655841	104757800
2004-03-23	1.661485	1.670057	1.614343	1.619343	96378800
2004-03-24	1.616361	1.650647	1.616361	1.63279	107053800
2004-03-25	1.668369	1.723369	1.650512	1.720512	141611400
2004-03-26	1.728539	1.754254	1.722111	1.731397	104973400
2004-03-29	1.748533	1.792819	1.73639	1.787104	87682000
2004-03-30	1.774887	1.789887	1.746315	1.787744	89919200
2004-03-31	1.794254	1.798539	1.724968	1.731397	97693400
2004-04-01	1.720164	1.747307	1.700879	1.735879	79583000
2004-04-02	1.778708	1.791565	1.741565	1.760851	68619600
2004-04-05	1.753357	1.816928	1.7505	1.813357	96418000
2004-04-06	1.773411	1.804839	1.753411	1.781982	64498000
2004-04-07	1.770115	1.776543	1.720829	1.748686	63779800
2004-04-08	1.787772	1.796343	1.7392	1.762772	60229400
2004-04-12	1.756858	1.799715	1.756143	1.795429	57635200
2004-04-13	1.799354	1.802926	1.717926	1.724354	109099200
2004-04-14	1.712928	1.736499	1.682214	1.705785	159933200
2004-04-15	1.841821	1.896107	1.794679	1.876107	440361600
2004-04-16	1.866281	1.877709	1.819852	1.868424	100732800
2004-04-19	1.798849	1.843849	1.778135	1.815278	178088400
2004-04-20	1.809865	1.824151	1.763436	1.775579	88629800
2004-04-21	1.766294	1.803436	1.749865	1.775579	81468800
2004-04-22	1.763065	1.807351	1.730923	1.77878	86146200
2004-04-23	1.773657	1.795086	1.727229	1.773657	78957200
2004-04-26	1.769303	1.773589	1.727874	1.73716	57782200
2004-04-27	1.746422	1.760708	1.707137	1.724994	70966000
2004-04-28	1.720047	1.733619	1.685762	1.693619	57792000
2004-04-29	1.691252	1.730537	1.65768	1.714109	115197600
2004-04-30	1.717146	1.735003	1.630003	1.650718	116625600
2004-05-03	1.664287	1.687858	1.645715	1.669287	74408600
2004-05-04	1.661626	1.703055	1.628055	1.673769	69995800
2004-05-05	1.674283	1.713568	1.65714	1.706425	59526600
2004-05-06	1.689086	1.714086	1.653372	1.701943	65889600
2004-05-07	1.699135	1.771992	1.699135	1.707706	104759200
2004-05-10	1.68202	1.705591	1.658448	1.682734	62494600
2004-05-11	1.684944	1.741373	1.684944	1.737801	76293000
2004-05-12	1.711616	1.750902	1.672331	1.748045	61355000
2004-05-13	1.734573	1.778859	1.720288	1.741002	57463000
2004-05-14	1.74625	1.75125	1.689107	1.732678	64450400
2004-05-17	1.710071	1.735785	1.685785	1.705785	75111400
2004-05-18	1.72625	1.749107	1.714107	1.732678	51515800
2004-05-19	1.761329	1.768472	1.691329	1.6949	93898000
2004-05-20	1.704553	1.730981	1.693124	1.710267	49074200
2004-05-21	1.720879	1.742307	1.708736	1.735879	44973600
2004-05-24	1.747036	1.790607	1.734179	1.750607	58900800
2004-05-25	1.754119	1.826262	1.739119	1.819119	79994600
2004-05-26	1.812665	1.844808	1.789094	1.825523	80542000
2004-05-27	1.824466	1.834466	1.778752	1.803752	58993200
2004-05-28	1.798137	1.811709	1.778137	1.796709	36429400
2004-06-01	1.777423	1.806709	1.764566	1.796709	45533600
2004-06-02	1.788204	1.869632	1.771775	1.851775	79678200
2004-06-03	1.841337	1.860622	1.810622	1.818479	62732600
2004-06-04	1.827097	1.876383	1.823526	1.842811	99778000
2004-06-07	1.853763	1.920905	1.837334	1.908763	73969000
2004-06-08	1.917626	1.949769	1.906197	1.94334	103905200
2004-06-09	1.925878	1.970163	1.919449	1.933735	87301200
2004-06-10	1.929741	1.984741	1.929741	1.968312	64394400
2004-06-14	1.966471	1.968614	1.884328	1.928613	60996600
2004-06-15	1.954397	1.997254	1.934397	1.965111	111158600
2004-06-16	1.947803	2.137803	1.938517	2.096374	227410400
2004-06-17	2.082999	2.123714	2.057999	2.100856	137830000
2004-06-18	2.089402	2.142974	2.072974	2.107259	101563000
2004-06-21	2.126549	2.153692	2.055121	2.070121	97553400
2004-06-22	2.063022	2.11945	2.062308	2.113022	90127800
2004-06-23	2.107844	2.16713	2.099987	2.157844	97717200
2004-06-24	2.148118	2.16169	2.110261	2.124547	63128800
2004-06-25	2.112844	2.157844	2.107844	2.157844	80857000
2004-06-28	2.201081	2.201795	2.060366	2.080366	130274200
2004-06-29	2.050292	2.116007	2.00315	2.081007	147638400
2004-06-30	2.084996	2.114282	2.037139	2.083568	93261000
2004-07-01	2.053914	2.081057	2.039628	2.0682	85485400
2004-07-02	1.947225	1.997225	1.893653	1.990082	227670800
2004-07-06	2.004616	2.01533	1.971044	1.981758	87245200
2004-07-07	1.978758	2.015187	1.92733	1.945901	99498000
2004-07-08	1.929179	1.968465	1.916322	1.929893	58345000
2004-07-09	1.939993	1.956421	1.92285	1.92285	52215800
2004-07-12	1.928719	1.930147	1.850862	1.865862	127905400
2004-07-13	1.873128	1.898128	1.856699	1.870985	79044000
2004-07-14	1.842608	1.921893	1.834036	1.894036	208950000
2004-07-15	2.089253	2.158539	2.049967	2.108539	441931000
2004-07-16	2.104654	2.113226	2.056083	2.061797	122095400
2004-07-19	2.049927	2.064927	2.024927	2.047069	133292600
2004-07-20	2.04394	2.061797	2.015369	2.061797	80936800
2004-07-21	2.081802	2.102517	2.004659	2.024659	75314400
2004-07-22	1.997787	2.032072	1.984215	2.028501	83529600
2004-07-23	2.025037	2.040751	1.950037	1.965751	68392800
2004-07-26	1.972322	2.015179	1.967322	2.001608	98483000
2004-07-27	2.031524	2.099381	2.015095	2.076524	106251600
2004-07-28	2.069136	2.076279	1.986993	2.066279	71262800
2004-07-29	2.077828	2.102828	2.053542	2.089971	55539400
2004-07-30	2.092904	2.117904	2.046475	2.070761	60755800
2004-08-02	1.993527	2.066384	1.989956	2.022098	91273000
2004-08-03	2.014957	2.034243	1.993529	2.003529	52907400
2004-08-04	1.992687	2.059116	1.991259	2.035544	69122200
2004-08-05	2.039932	2.074932	1.999932	2.009932	61125400
2004-08-06	1.986842	2.001128	1.901127	1.906842	123072600
2004-08-09	1.907995	1.950852	1.905138	1.940138	72711800
2004-08-10	1.937541	2.019684	1.934684	2.018256	87759000
2004-08-11	1.992029	1.994172	1.932029	1.9856	80598000
2004-08-12	1.950334	1.978905	1.938191	1.94462	56550200
2004-08-13	1.957572	2.006144	1.943287	1.974715	82012000
2004-08-16	1.986588	2.038016	1.960873	1.970873	108918600
2004-08-17	1.955922	1.995208	1.939493	1.976636	80754800
2004-08-18	1.944486	2.0402	1.943057	2.032343	91163800
2004-08-19	2.023534	2.048534	1.941391	1.966391	97230000
2004-08-20	1.965725	1.985725	1.950011	1.972154	79195200
2004-08-23	1.974368	2.003654	1.955796	1.990082	63665000
2004-08-24	1.996503	2.045789	1.991503	2.045789	93534000
2004-08-25	2.031937	2.123366	2.021937	2.116223	126404600
2004-08-26	2.103598	2.256455	2.082169	2.219312	238964600
2004-08-27	2.223036	2.22875	2.174464	2.199464	97203400
2004-08-30	2.176164	2.227593	2.173307	2.184736	54535600
2004-08-31	2.178428	2.241285	2.173428	2.208428	94140200
2004-09-01	2.184722	2.305436	2.176865	2.296151	128931600
2004-09-02	2.271915	2.294058	2.224058	2.283344	101581200
2004-09-03	2.240096	2.305096	2.240096	2.25581	73367000
2004-09-07	2.264032	2.320461	2.251889	2.289747	75489400
2004-09-08	2.281097	2.34324	2.279668	2.327526	85881600
2004-09-09	2.314476	2.328762	2.255905	2.285905	115334800
2004-09-10	2.281791	2.322505	2.267505	2.296791	82003600
2004-09-13	2.299576	2.313148	2.259576	2.278862	70494200
2004-09-14	2.254602	2.276745	2.221745	2.272459	63705600
2004-09-15	2.265318	2.27389	2.225318	2.25389	58167200
2004-09-16	2.245383	2.356811	2.236811	2.327526	125479200
2004-09-17	2.335967	2.395253	2.325253	2.37811	125577200
2004-09-20	2.355322	2.433893	2.354607	2.414607	61250000
2004-09-21	2.415245	2.495244	2.39453	2.433816	96663000
2004-09-22	2.448309	2.451166	2.356166	2.364023	100422000
2004-09-23	2.370005	2.402862	2.362148	2.386434	99351000
2004-09-24	2.399144	2.43843	2.377715	2.387715	92372000
2004-09-27	2.361654	2.435225	2.353082	2.403082	99379000
2004-09-28	2.394309	2.453595	2.393595	2.435738	88296600
2004-09-29	2.423147	2.489575	2.41529	2.476718	68377400
2004-09-30	2.499056	2.518342	2.45977	2.481199	106253000
2004-10-01	2.50822	2.51322	2.469648	2.476077	116351200
2004-10-04	2.511618	2.511618	2.480904	2.483761	143521000
2004-10-05	2.463042	2.542327	2.451613	2.520899	101540600
2004-10-06	2.520791	2.610791	2.518648	2.602219	111575800
2004-10-07	2.60262	2.630477	2.525477	2.536906	106537200
2004-10-08	2.536764	2.551764	2.485336	2.50105	89807200
2004-10-11	2.485956	2.504527	2.443098	2.470955	80967600
2004-10-12	2.466745	2.472459	2.406031	2.451745	115047800
2004-10-13	2.482373	2.545945	2.473088	2.545231	290752000
2004-10-14	2.752256	2.935113	2.706542	2.880113	692106800
2004-10-15	2.869122	2.921265	2.819837	2.913408	257782000
2004-10-18	2.839621	3.057478	2.839621	3.057478	300188000
2004-10-19	3.084919	3.102776	3.028491	3.036348	200498200
2004-10-20	3.018836	3.048836	2.980979	3.03955	151277000
2004-10-21	3.036786	3.083215	3.028215	3.069644	181126400
2004-10-22	3.044993	3.054279	3.007851	3.035708	120766800
2004-10-25	3.019671	3.065386	3.010386	3.044672	98161000
2004-10-26	3.034422	3.077279	3.000136	3.071565	148590400
2004-10-27	3.0929	3.243614	3.068614	3.220757	298373600
2004-10-28	3.183919	3.343919	3.149633	3.341776	216066200
2004-10-29	3.315223	3.412366	3.312366	3.355223	202554800
2004-11-01	3.361996	3.416282	3.329139	3.358424	150512600
2004-11-02	3.347084	3.467084	3.347084	3.425656	182497000
2004-11-03	3.47441	3.598696	3.447268	3.541553	301043400
2004-11-04	3.527915	3.565058	3.480772	3.486487	232156400
2004-11-05	3.513774	3.523774	3.312346	3.503774	301261800
2004-11-08	3.474147	3.558432	3.444861	3.482004	131730200
2004-11-09	3.47373	3.496588	3.413016	3.460873	118941200
2004-11-10	3.448552	3.55141	3.445695	3.505695	127169000
2004-11-11	3.515912	3.550198	3.464483	3.540912	101824800
2004-11-12	3.518719	3.56729	3.506576	3.553719	98925400
2004-11-15	3.534213	3.552785	3.472784	3.53707	94011400
2004-11-16	3.533575	3.536432	3.485003	3.517861	73775800
2004-11-17	3.536013	3.554584	3.466727	3.515299	99437800
2004-11-18	3.468817	3.550959	3.468102	3.546674	114787400
2004-11-19	3.555445	3.656874	3.484731	3.532588	191319800
2004-11-22	3.960443	4.117586	3.681871	3.9283	642052600
2004-11-23	3.996748	4.007462	3.907462	3.923177	227862600
2004-11-24	3.93261	4.183325	3.922611	4.101182	347697000
2004-11-26	4.190342	4.219628	4.118199	4.133199	137536000
2004-11-29	4.418707	4.462992	4.308707	4.382278	428229200
2004-11-30	4.417562	4.417562	4.293277	4.293277	257129600
2004-12-01	4.340658	4.352086	4.232087	4.340658	200138400
2004-12-02	4.241174	4.296175	4.136174	4.17546	246860600
2004-12-03	4.145604	4.179175	3.947032	4.013461	309712200
2004-12-06	4.102671	4.244814	4.009813	4.211956	311980200
2004-12-07	4.24405	4.301192	4.003336	4.026907	264224800
2004-12-08	4.037593	4.134022	3.964022	4.051879	172975600
2004-12-09	4.013056	4.126627	3.960198	4.097341	185375400
2004-12-10	4.163045	4.235902	4.139473	4.171617	193943400
2004-12-13	4.206964	4.226964	4.134107	4.156249	98760200
2004-12-14	4.18844	4.222725	4.161297	4.180582	103930400
2004-12-15	4.177231	4.192945	4.135802	4.178659	99590400
2004-12-16	4.232319	4.328748	4.225176	4.264462	281528800
2004-12-17	4.293515	4.3078	4.154943	4.161372	195874000
2004-12-20	4.212451	4.250308	3.94745	4.016022	292031600
2004-12-21	4.068847	4.083847	3.928847	4.078133	266103600
2004-12-22	4.075545	4.125545	4.056974	4.081973	141457400
2004-12-23	4.080049	4.115764	4.069335	4.098621	61482400
2004-12-27	4.16134	4.18634	4.024196	4.044196	139872600
2004-12-28	4.046649	4.114506	3.957363	4.109506	152938800
2004-12-29	4.081154	4.164725	4.064011	4.126154	112390600
2004-12-30	4.149921	4.165635	4.107778	4.149207	86335200
2004-12-31	4.158594	4.166451	4.097165	4.123594	69647200
2005-01-03	4.158949	4.18252	4.003234	4.05252	172998000
2005-01-04	4.083424	4.203425	4.024853	4.094139	274202600
2005-01-05	4.127139	4.183567	4.097853	4.129996	170108400
2005-01-06	4.141771	4.158913	4.046056	4.133199	176388800
2005-01-07	4.130572	4.461286	4.112715	4.434144	556862600
2005-01-10	4.477719	4.539862	4.338433	4.415576	431327400
2005-01-11	4.39741	4.461696	4.103839	4.133839	652906800
2005-01-12	4.190754	4.222897	4.037183	4.191468	479925600
2005-01-13	4.748647	4.799361	4.464361	4.469361	791179200
2005-01-14	4.498545	4.603545	4.422831	4.494974	442685600
2005-01-18	4.466644	4.527358	4.316644	4.523787	251615000
2005-01-19	4.518055	4.587341	4.465198	4.474483	187973800
2005-01-20	4.453764	4.569478	4.440907	4.511621	228730600
2005-01-21	4.572114	4.592828	4.478542	4.513542	227833200
2005-01-24	4.546543	4.603686	4.515829	4.530829	210407400
2005-01-25	4.564859	4.669859	4.534145	4.613431	242307800
2005-01-26	4.655523	4.661952	4.552666	4.626237	184874200
2005-01-27	4.616925	4.67121	4.573353	4.65121	124056800
2005-01-28	4.639867	4.73701	4.62701	4.73701	200403000
2005-01-31	4.758267	4.994695	4.753267	4.923981	420274400
2005-02-01	4.930037	4.981465	4.896465	4.964322	169598800
2005-02-02	4.978785	5.118785	4.960214	5.098785	255015600
2005-02-03	5.074393	5.097965	4.947964	4.98225	182912800
2005-02-04	4.978916	5.05463	4.95463	5.048202	140889000
2005-02-07	5.053891	5.083891	4.951748	5.054605	131114200
2005-02-08	5.04939	5.21439	5.02939	5.180105	222504800
2005-02-09	5.206084	5.273942	4.996084	5.041799	297864000
2005-02-10	5.04318	5.08318	4.896037	5.017466	273254800
2005-02-11	5.103527	5.239241	5.037812	5.199955	300263600
2005-02-14	5.283227	5.430369	5.234655	5.418941	317865800
2005-02-15	5.535978	5.708835	5.488835	5.660978	578054400
2005-02-16	5.629683	5.776111	5.57254	5.771111	409810800
2005-02-17	5.825416	5.841844	5.596844	5.622559	379618400
2005-02-18	5.624956	5.633527	5.518527	5.558527	290813600
2005-02-22	5.533344	5.676201	5.461201	5.461201	304823400
2005-02-23	5.541594	5.665165	5.458022	5.649451	336295400
2005-02-24	5.66213	5.721416	5.608558	5.694273	379757000
2005-02-25	5.743116	5.76383	5.640973	5.698116	228877600
2005-02-28	5.719144	5.784858	5.616287	5.744858	162902600
2005-03-01	5.768756	5.785899	5.650184	5.698756	117047000
2005-03-02	5.668665	5.760093	5.644379	5.650093	114540300
2005-03-03	5.720279	5.725992	5.270278	5.351707	352913400
2005-03-04	5.475189	5.510903	5.345188	5.482331	189154700
2005-03-07	5.481789	5.546074	5.417503	5.474646	112658000
2005-03-08	5.386064	5.423207	5.128921	5.19035	255362800
2005-03-09	5.080665	5.172094	4.964951	5.039236	330616300
2005-03-10	5.057849	5.162135	4.99642	5.100706	194277300
2005-03-11	5.148482	5.202768	5.08991	5.157053	158207700
2005-03-14	5.192028	5.2306	5.049171	5.163457	151346300
2005-03-15	5.199701	5.27113	5.143987	5.245416	127152200
2005-03-16	5.277875	5.435018	5.216446	5.273589	174453300
2005-03-17	5.307759	5.500616	5.277759	5.410616	200480000
2005-03-18	5.554397	5.570111	5.435826	5.50154	235037600
2005-03-21	5.537735	5.634877	5.476306	5.596306	135282000
2005-03-22	5.610607	5.646321	5.463464	5.484892	137853800
2005-03-23	5.434749	5.570463	5.37332	5.449034	152455800
2005-03-24	5.501202	5.514059	5.442631	5.442631	88176200
2005-03-28	5.477902	5.507902	5.437902	5.446473	68852700
2005-03-29	5.462299	5.50087	5.31087	5.346585	115339000
2005-03-30	5.376764	5.48105	5.34105	5.48105	98739900
2005-03-31	5.447769	5.457769	5.324912	5.33634	159033700
2005-04-01	5.40788	5.420737	5.190737	5.236452	160321000
2005-04-04	5.247779	5.293494	5.129208	5.262065	145003600
2005-04-05	5.268799	5.414514	5.250228	5.364514	139059900
2005-04-06	5.430861	5.489432	5.395147	5.420861	103706400
2005-04-07	5.402662	5.605519	5.391233	5.578376	126746900
2005-04-08	5.595715	5.702858	5.572858	5.601429	162487500
2005-04-11	5.686927	5.701213	5.366927	5.368356	205415700
2005-04-12	5.438837	5.538837	5.370266	5.463122	245265300
2005-04-13	5.528519	5.534233	5.162805	5.255662	342986700
2005-04-14	4.993016	5.100159	4.711587	4.771587	688298100
2005-04-15	4.708419	4.798419	4.51699	4.52699	432021800
2005-04-18	4.472995	4.658709	4.330138	4.561567	331794400
2005-04-19	4.679815	4.799815	4.57553	4.749816	270410700
2005-04-20	4.854622	4.86605	4.537479	4.547479	236282900
2005-04-21	4.649914	4.765628	4.578486	4.761343	189898100
2005-04-22	4.737626	4.760483	4.460483	4.546198	209782300
2005-04-25	4.665729	4.741443	4.611443	4.735729	186615100
2005-04-26	4.718847	4.823133	4.624561	4.634561	202626900
2005-04-27	4.595254	4.662397	4.540968	4.603825	153472200
2005-04-28	4.658465	4.665608	4.508465	4.551322	143776500
2005-04-29	4.63077	4.642198	4.497912	4.617913	167907600
2005-05-02	4.633867	4.696724	4.606724	4.665296	116480000
2005-05-03	4.664265	4.712836	4.611408	4.637122	124184900
2005-05-04	4.608928	4.764643	4.6075	4.7575	112044100
2005-05-05	4.778741	4.781598	4.667312	4.697312	96841500
2005-05-06	4.719027	4.781884	4.704741	4.769027	81561900
2005-05-09	4.778735	4.803021	4.703021	4.734449	88923800
2005-05-10	4.711158	4.782587	4.651158	4.664015	110065900
2005-05-11	4.501715	4.568857	4.203143	4.560286	510495300
2005-05-12	4.555039	4.579325	4.352182	4.370753	242560500
2005-05-13	4.371285	4.518428	4.352714	4.452714	175678300
2005-05-16	4.411173	4.57403	4.406887	4.552601	118573700
2005-05-17	4.496841	4.542555	4.411127	4.52827	147086100
2005-05-18	4.534025	4.835453	4.46831	4.589739	159180700
2005-05-19	4.555869	4.827297	4.555869	4.808726	198290400
2005-05-20	4.765869	4.823012	4.757297	4.808726	113162700
2005-05-23	4.818885	5.111742	4.818885	5.091742	260643600
2005-05-24	5.048343	5.125486	4.988343	5.084058	148365000
2005-05-25	5.054304	5.11859	5.02859	5.094304	99001700
2005-05-26	5.102956	5.245813	5.102956	5.217242	131380200
2005-05-27	5.205619	5.227048	5.115619	5.194191	79002000
2005-05-31	5.220313	5.231742	5.066028	5.091742	101051300
2005-06-01	5.102324	5.22661	5.098039	5.160896	113453200
2005-06-02	5.129027	5.167599	5.064742	5.127599	93493400
2005-06-03	4.885659	4.945659	4.829945	4.897088	239217300
2005-06-06	4.91468	4.957537	4.80468	4.856109	202991600
2005-06-07	4.830811	4.849383	4.666526	4.679383	186316200
2005-06-08	4.686617	4.775189	4.678046	4.728046	101001600
2005-06-09	4.728673	4.862959	4.702959	4.821531	97563900
2005-06-10	4.813039	4.813039	4.544468	4.585896	169733200
2005-06-13	4.595995	4.698852	4.585995	4.597424	108943100
2005-06-14	4.598801	4.631658	4.574515	4.610229	86961700
2005-06-15	4.717795	4.779223	4.636366	4.754938	140835800
2005-06-16	4.750935	4.878078	4.698078	4.863792	136918600
2005-06-17	4.928909	4.938909	4.837481	4.906052	149031400
2005-06-20	4.850695	4.884981	4.793552	4.816409	80929100
2005-06-21	4.828423	4.895566	4.779852	4.848423	92631700
2005-06-22	4.895358	4.94393	4.878215	4.936787	106231300
2005-06-23	4.971756	5.10747	4.946042	4.980327	168563500
2005-06-24	5.025618	5.029904	4.824189	4.835618	102677400
2005-06-27	4.713954	4.893954	4.691097	4.751097	150042900
2005-06-28	4.803705	4.817991	4.757991	4.777991	87574900
2005-06-29	4.780471	4.789042	4.621899	4.657613	112089600
2005-06-30	4.685387	4.763958	4.64253	4.713959	104597500
2005-07-01	4.721402	4.741402	4.64426	4.67426	62500200
2005-07-05	4.659506	4.888078	4.652364	4.863792	113567300
2005-07-06	4.83395	4.898235	4.761093	4.788236	98656600
2005-07-07	4.701829	4.837543	4.7004	4.818971	95930800
2005-07-08	4.844083	4.902655	4.78694	4.898369	72683800
2005-07-11	4.917731	4.957731	4.833445	4.879159	97197100
2005-07-12	4.89566	4.919945	4.849945	4.897088	96759600
2005-07-13	4.902604	4.932604	4.84689	4.911175	171208800
2005-07-14	5.224238	5.398524	5.144238	5.218524	524015100
2005-07-15	5.238116	5.32383	5.165259	5.320973	171920700
2005-07-18	5.301861	5.400433	5.296147	5.31329	146574400
2005-07-19	5.292423	5.536709	5.228138	5.530995	167765500
2005-07-20	5.477343	5.611629	5.447343	5.587343	113348900
2005-07-21	5.602372	5.650944	5.488087	5.543801	101066000
2005-07-22	5.554725	5.634725	5.547582	5.634725	75276600
2005-07-25	5.636106	5.677534	5.598963	5.610392	73656800
2005-07-26	5.641629	5.655915	5.548772	5.587343	67148200
2005-07-27	5.610586	5.644872	5.444872	5.633444	70937300
2005-07-28	5.616255	5.637683	5.537683	5.609112	62827800
2005-07-29	5.591842	5.708985	5.406128	5.461842	140520100
2005-08-01	5.448932	5.521789	5.378931	5.474646	78562400
2005-08-02	5.488138	5.575281	5.448138	5.530995	74218900
2005-08-03	5.53055	5.547693	5.47055	5.534836	64580600
2005-08-04	5.495238	5.510952	5.409524	5.469524	67326000
2005-08-05	5.433955	5.558241	5.366812	5.505383	60482800
2005-08-08	5.511842	5.547556	5.456128	5.461842	44095800
2005-08-09	5.484531	5.621674	5.481674	5.611674	95209800
2005-08-10	5.643897	5.699612	5.545326	5.555326	90236300
2005-08-11	5.547582	5.651868	5.527582	5.634725	67995900
2005-08-12	5.526511	5.920797	5.512226	5.903654	229009200
2005-08-15	5.934563	6.198849	5.930277	6.105992	271681900
2005-08-16	6.085721	6.101435	5.91715	5.922864	134405600
2005-08-17	5.930977	6.079548	5.926691	6.038119	124931100
2005-08-18	6.016409	6.029267	5.850695	5.929267	110639900
2005-08-19	5.933365	5.993365	5.860507	5.869079	94142300
2005-08-22	5.914201	5.999915	5.787058	5.874201	96933200
2005-08-23	5.873267	5.908981	5.797553	5.857553	73901100
2005-08-24	5.837109	6.054252	5.83568	5.861394	143017700
2005-08-25	5.907103	5.959959	5.862817	5.898531	69063400
2005-08-26	5.911839	5.943267	5.803267	5.857553	65264500
2005-08-29	5.788929	5.8975	5.7875	5.870358	64073800
2005-08-30	5.880986	5.995272	5.870986	5.963843	129690400
2005-08-31	6.000539	6.024825	5.916253	6.004824	100739100
2005-09-01	6.029859	6.054145	5.899859	5.924145	89091800
2005-09-02	5.930451	6.001879	5.904737	5.919022	55594700
2005-09-06	5.949423	6.260851	5.927994	6.249422	204654800
2005-09-07	6.286911	6.336911	6.125482	6.234054	240768500
2005-09-08	6.313494	6.423494	6.283494	6.374923	175660100
2005-09-09	6.393715	6.576572	6.353715	6.570858	153910400
2005-09-12	6.539527	6.615241	6.465241	6.582384	113199100
2005-09-13	6.53668	6.575252	6.43668	6.508109	123221000
2005-09-14	6.560295	6.578866	6.331723	6.353152	118606600
2005-09-15	6.405019	6.430733	6.309305	6.386448	103789000
2005-09-16	6.418052	6.558052	6.378052	6.558052	147751100
2005-09-19	6.514037	6.776894	6.514037	6.74118	195932800
2005-09-20	6.783043	6.900186	6.773043	6.811614	204957200
2005-09-21	6.794734	6.807591	6.637591	6.673306	108686900
2005-09-22	6.643557	6.727843	6.563558	6.646415	115931900
2005-09-23	6.655751	6.855751	6.618609	6.812894	139614300
2005-09-26	6.921997	6.997711	6.820568	6.894854	136640700
2005-09-27	6.912199	6.957913	6.842199	6.843628	85425900
2005-09-28	6.825689	6.831403	6.471403	6.541403	281386000
2005-09-29	6.54419	6.738475	6.48419	6.702761	159211500
2005-09-30	6.682542	6.871114	6.618256	6.865399	132908300
2005-10-03	6.931691	6.985977	6.863119	6.971691	126888300
2005-10-04	7.054758	7.111901	6.867615	6.883329	134864800
2005-10-05	6.980537	6.984823	6.754823	6.759109	152692400
2005-10-06	6.835086	6.876514	6.502229	6.6208	189384300
2005-10-07	6.629576	6.659576	6.462433	6.569576	169470700
2005-10-10	6.649051	6.670479	6.437622	6.450479	126876400
2005-10-11	6.555287	6.646715	6.436715	6.606715	306471200
2005-10-12	6.221335	6.457049	6.109907	6.307049	674371600
2005-10-13	6.267762	6.912048	6.243476	6.882048	466393900
2005-10-14	6.91963	6.965344	6.742487	6.915344	258888000
2005-10-17	6.920771	6.956485	6.735056	6.843628	154208600
2005-10-18	6.834684	6.934684	6.684684	6.686112	152397000
2005-10-19	6.625722	7.03858	6.502865	7.035722	252170800
2005-10-20	6.950825	7.240825	6.933683	7.189397	339440500
2005-10-21	7.296499	7.316499	7.08507	7.127927	199181500
2005-10-24	7.052637	7.272637	7.02978	7.272637	152438300
2005-10-25	7.227131	7.291416	7.125702	7.184274	116281900
2005-10-26	7.196228	7.379085	7.1448	7.30337	157898300
2005-10-27	7.321627	7.324484	7.095912	7.095912	102885300
2005-10-28	7.199819	7.255534	6.932677	6.975533	192446800
2005-10-31	7.033656	7.430799	6.969371	7.375085	235211200
2005-11-01	7.326418	7.45499	7.273561	7.363561	187421500
2005-11-02	7.35874	7.684454	7.341598	7.677311	214265100
2005-11-03	7.693487	7.987773	7.666345	7.92063	221095700
2005-11-04	7.716698	7.843841	7.612413	7.830984	219508800
2005-11-07	7.801741	7.918884	7.700313	7.713169	159707800
2005-11-08	7.678052	7.739481	7.556624	7.67091	118441400
2005-11-09	7.682085	7.854943	7.682085	7.6978	138232500
2005-11-10	7.757685	7.837685	7.524828	7.834828	166336100
2005-11-11	7.880932	7.96236	7.85236	7.880932	106362200
2005-11-14	7.882263	7.945119	7.792262	7.869405	92483300
2005-11-15	7.878554	8.089983	7.858554	7.975696	134210300
2005-11-16	8.06048	8.333338	8.051909	8.317623	196128800
2005-11-17	8.41541	8.456838	8.223982	8.262553	169051400
2005-11-18	8.374821	8.391964	8.240535	8.267678	131240200
2005-11-21	8.298904	8.351761	8.141762	8.318904	127927800
2005-11-22	8.278679	8.552965	8.232965	8.518679	135070600
2005-11-23	8.561378	8.718521	8.534235	8.594235	121463300
2005-11-25	8.639815	8.908387	8.616959	8.879815	98753200
2005-11-28	9.072223	9.122222	8.836508	8.920793	254629900
2005-11-29	8.991016	9.035302	8.613873	8.721017	222858300
2005-11-30	8.772301	8.832301	8.642302	8.685158	148918700
2005-12-01	8.790661	9.187804	8.770661	9.169233	203223300
2005-12-02	9.24971	9.316853	9.025424	9.301138	223940500
2005-12-05	9.215979	9.298836	9.150265	9.197408	145917800
2005-12-06	9.465839	9.59441	9.382982	9.482981	214257400
2005-12-07	9.510178	9.543036	9.351607	9.470178	169866200
2005-12-08	9.361114	9.499686	9.275399	9.486828	197619800
2005-12-09	9.501701	9.555986	9.378844	9.518843	138850600
2005-12-12	9.587406	9.655978	9.54312	9.59312	131248600
2005-12-13	9.583513	9.670656	9.492085	9.602085	123454100
2005-12-14	9.296025	9.406026	8.973168	9.22174	362679100
2005-12-15	9.314938	9.340652	9.124938	9.24351	140290500
2005-12-16	9.253627	9.276483	9.09934	9.106483	167792800
2005-12-19	9.102489	9.315346	9.092489	9.141061	132323800
2005-12-20	9.165974	9.273117	9.093117	9.234546	119777000
2005-12-21	9.283977	9.428264	9.275406	9.412549	118934200
2005-12-22	9.463427	9.546284	9.419141	9.479141	92652700
2005-12-23	9.510486	9.523342	9.3862	9.393343	57464400
2005-12-27	9.473178	9.64175	9.466035	9.506035	147647500
2005-12-28	9.550087	9.591515	9.385801	9.421515	99528800
2005-12-29	9.482882	9.488596	9.145739	9.150025	122506300
2005-12-30	9.066375	9.283518	8.984947	9.206375	156065700
2006-01-03	9.234057	9.572629	9.215485	9.572629	201808600
2006-01-04	9.623659	9.745087	9.53366	9.600802	154900900
2006-01-05	9.589531	9.599531	9.435245	9.525245	112355600
2006-01-06	9.621125	9.828268	9.521125	9.771125	176114400
2006-01-09	9.836251	9.903393	9.694822	9.739107	168760200
2006-01-10	9.696516	10.502229	9.636515	10.355087	569967300
2006-01-11	10.735825	10.872967	10.557254	10.744396	373448600
2006-01-12	10.891483	11.095768	10.698625	10.79434	320202400
2006-01-13	10.875106	11.02082	10.819391	10.96082	194076400
2006-01-17	10.989554	11.086697	10.728125	10.848126	208905900
2006-01-18	10.648113	10.786685	10.472399	10.563828	300159300
2006-01-19	10.437727	10.496299	10.079156	10.122014	423962000
2006-01-20	10.199947	10.308519	9.70709	9.744233	283689700
2006-01-23	9.72228	10.216566	9.707994	9.946567	264932500
2006-01-24	10.126399	10.220685	9.699256	9.737827	285563600
2006-01-25	9.957909	9.973622	9.36648	9.502194	318946600
2006-01-26	9.577002	9.705574	9.205574	9.262717	295346800
2006-01-27	9.355728	9.448585	9.091442	9.224299	238466200
2006-01-30	9.057502	9.833216	9.014645	9.604645	349600300
2006-01-31	9.668527	9.788527	9.418527	9.669956	228385500
2006-02-01	9.591287	9.807001	9.547001	9.658429	130296600
2006-02-02	9.661836	9.698979	9.226121	9.233264	176830500
2006-02-03	9.256962	9.335533	9.085533	9.201248	173030900
2006-02-06	9.292852	9.362852	8.538567	8.618566	412941900
2006-02-07	8.7527	8.925557	8.525557	8.656986	347207700
2006-02-08	8.766228	8.850513	8.410514	8.811942	238278600
2006-02-09	8.91048	8.929052	8.257624	8.317623	287441000
2006-02-10	8.315563	8.671277	7.989848	8.619848	440119400
2006-02-13	8.561174	8.578316	8.276887	8.286888	220874500
2006-02-14	8.299251	8.727823	8.284965	8.662108	290234700
2006-02-15	8.570159	8.921587	8.511587	8.864445	289942800
2006-02-16	8.943044	9.100187	8.881615	9.03733	237043800
2006-02-17	9.002899	9.087185	8.904327	9.001471	143999800
2006-02-21	9.062231	9.09223	8.789374	8.846516	194901700
2006-02-22	8.801947	9.183376	8.659091	9.133376	244559700
2006-02-23	9.194157	9.367015	9.142729	9.188443	214229400
2006-02-24	9.248451	9.355593	9.114165	9.151307	133686000
2006-02-27	9.233973	9.252544	9.042544	9.091116	197810200
2006-02-28	9.212391	9.329533	8.715248	8.770962	316745100
2006-03-01	8.811938	8.904795	8.694795	8.84908	190954400
2006-03-02	8.825821	8.968678	8.780107	8.914392	156318400
2006-03-03	8.912354	8.985211	8.64521	8.672354	184417100
2006-03-06	8.70121	8.705496	8.308353	8.385495	228166400
2006-03-07	8.413215	8.576072	8.316072	8.491786	218219400
2006-03-08	8.498547	8.628547	8.364261	8.408547	163312800
2006-03-09	8.479854	8.549854	8.169854	8.186997	199826200
2006-03-10	8.215088	8.277945	7.986517	8.092231	260785700
2006-03-13	8.321107	8.496822	8.283964	8.411107	215296900
2006-03-14	8.3997	8.621128	8.361127	8.621128	160505100
2006-03-15	8.692968	8.740111	8.380111	8.48154	222999000
2006-03-16	8.59852	8.605663	8.234235	8.235663	187409600
2006-03-17	8.293342	8.406199	8.201913	8.280485	203010500
2006-03-20	8.370394	8.404681	8.177538	8.194681	151360300
2006-03-21	7.915507	8.276935	7.855507	7.915507	336341600
2006-03-22	7.967579	8.123293	7.840436	7.897579	336473900
2006-03-23	7.941345	7.952773	7.625631	7.704202	356956600
2006-03-24	7.720021	7.818593	7.545737	7.678593	267995000
2006-03-27	7.740965	7.888109	7.605251	7.620966	277018000
2006-03-28	7.649944	7.722801	7.4528	7.518515	342580700
2006-03-29	7.524957	8.009243	7.316385	7.982099	586708500
2006-03-30	8.045887	8.114458	7.861601	8.035887	347662700
2006-03-31	8.107757	8.159186	7.963472	8.032043	203839300
2006-04-03	8.168795	8.23308	8.017365	8.02308	203947800
2006-04-04	7.966405	7.983549	7.816406	7.833548	232981000
2006-04-05	8.249898	8.607041	8.169898	8.607041	558352200
2006-04-06	8.703134	9.238848	8.688848	9.123134	665942200
2006-04-07	9.100299	9.140299	8.74887	8.937442	386309700
2006-04-10	9.025442	9.11687	8.762584	8.794013	225878800
2006-04-11	8.849789	8.894075	8.575504	8.706932	234829000
2006-04-12	8.728726	8.751583	8.484441	8.543012	184973600
2006-04-13	8.493704	8.650847	8.417989	8.512275	183669500
2006-04-17	8.54255	8.589693	8.233978	8.299693	180484500
2006-04-18	8.31169	8.515975	8.275975	8.480261	198711100
2006-04-19	8.574408	8.600122	8.381552	8.407266	271508300
2006-04-20	8.929402	8.999402	8.456545	8.66083	416745700
2006-04-21	8.749554	8.813841	8.50384	8.585269	197246700
2006-04-24	8.577214	8.587214	8.384356	8.420072	176757000
2006-04-25	8.443857	8.533857	8.386714	8.473857	132265700
2006-04-26	8.513136	8.745994	8.477422	8.727422	177721600
2006-04-27	8.649519	8.953805	8.595233	8.882376	211486800
2006-04-28	8.86999	9.144277	8.844277	9.014277	190009400
2006-05-01	9.080252	9.190252	8.850252	8.913109	187595100
2006-05-02	8.961793	9.223222	8.95608	9.171793	192915800
2006-05-03	9.208895	9.226037	8.97318	9.110323	171747800
2006-05-04	9.121903	9.360474	9.013331	9.109045	215105100
2006-05-05	9.20209	9.257803	9.100661	9.206375	140977900
2006-05-08	9.363518	9.479232	9.182089	9.206375	148712900
2006-05-09	9.209096	9.31481	9.037668	9.096238	132916700
2006-05-10	9.139744	9.145458	8.899743	9.041172	114972200
2006-05-11	9.104565	9.111708	8.641708	8.727422	203172200
2006-05-12	8.691221	8.811221	8.549793	8.669793	160443500
2006-05-15	8.621316	8.765602	8.585602	8.681316	132294400
2006-05-16	8.76718	8.788608	8.288608	8.321465	234185000
2006-05-17	8.278748	8.420177	8.187319	8.357319	188548500
2006-05-18	8.448094	8.530951	8.08238	8.090951	164610600
2006-05-19	8.082703	8.314132	8.019846	8.261274	246466500
2006-05-22	8.186566	8.203709	8.029423	8.116566	179743900
2006-05-23	8.331398	8.37854	8.065683	8.087111	173603500
2006-05-24	8.061443	8.155729	7.857158	8.111444	229007800
2006-05-25	8.228221	8.255364	8.08965	8.238221	115843000
2006-05-26	8.246906	8.28262	8.079763	8.138334	108237500
2006-05-30	8.135665	8.137093	7.83995	7.83995	140850500
2006-05-31	7.938547	7.942833	7.499976	7.654261	320244400
2006-06-01	7.63018	7.977322	7.583037	7.961609	235627000
2006-06-02	8.086298	8.102013	7.78487	7.896299	171446800
2006-06-05	7.848001	7.848001	7.679429	7.683715	151446400
2006-06-06	7.719289	7.777859	7.532145	7.647859	181509300
2006-06-07	7.719305	7.762163	7.469305	7.499305	187626600
2006-06-08	7.449615	7.805329	7.265329	7.781043	349370700
2006-06-09	7.86353	7.917816	7.566387	7.586387	193959500
2006-06-12	7.642387	7.68953	7.293816	7.299531	179446400
2006-06-13	7.366996	7.579853	7.331281	7.469853	270160800
2006-06-14	7.47336	7.544788	7.246218	7.377646	219534000
2006-06-15	7.307175	7.655746	7.228602	7.604317	297595900
2006-06-16	7.571244	7.604101	7.36553	7.371244	209525400
2006-06-19	7.415142	7.465142	7.296571	7.325142	176143800
2006-06-20	7.379719	7.485433	7.334005	7.359719	168243600
2006-06-21	7.39252	7.531092	7.329664	7.409664	215824000
2006-06-22	7.432786	7.654215	7.414215	7.62993	241408300
2006-06-23	7.661027	7.725314	7.519599	7.533884	165050900
2006-06-26	7.580089	7.584375	7.465804	7.554375	116634000
2006-06-27	7.591738	7.61031	7.35031	7.354596	137652900
2006-06-28	7.355457	7.356886	7.086885	7.174028	212676100
2006-06-29	7.236096	7.568953	7.18324	7.551811	218349600
2006-06-30	7.379821	7.402678	7.224106	7.334107	184923900
2006-07-03	7.359761	7.454047	7.334046	7.421189	48692700
2006-07-05	7.320959	7.385245	7.236673	7.299531	129560200
2006-07-06	7.330585	7.374871	7.119157	7.142014	158302200
2006-07-07	7.106058	7.258915	6.990344	7.09463	199840200
2006-07-10	7.143406	7.256263	6.971977	7.043406	132336400
2006-07-11	7.049503	7.175217	6.966646	7.126646	206255700
2006-07-12	7.097874	7.107873	6.776445	6.782159	231832300
2006-07-13	6.659807	6.958379	6.571235	6.691236	312476500
2006-07-14	6.750325	6.806039	6.416039	6.488897	248259200
2006-07-17	6.615174	6.812317	6.603746	6.706603	256135600
2006-07-18	6.811619	6.910191	6.624477	6.774477	250112100
2006-07-19	6.765294	7.068151	6.67958	6.928151	347685800
2006-07-20	7.813459	7.90346	7.636316	7.747746	493036600
2006-07-21	7.647351	7.837351	7.621637	7.775923	222973100
2006-07-24	7.842707	7.962706	7.724135	7.865563	180714100
2006-07-25	7.909446	7.953732	7.76659	7.930875	147267400
2006-07-26	7.912171	8.289314	7.866458	8.179315	224606900
2006-07-27	8.276267	8.350552	8.041981	8.119124	183761200
2006-07-28	8.163866	8.412437	8.101008	8.39958	172876900
2006-07-31	8.541659	8.798802	8.463088	8.703087	223210400
2006-08-01	8.608916	8.710344	8.426058	8.603201	177941400
2006-08-02	8.655843	8.802986	8.635843	8.7287	137692100
2006-08-03	8.67183	8.970402	8.657545	8.91183	210261100
2006-08-04	8.568057	8.790915	8.269486	8.746629	463216600
2006-08-07	8.679898	8.948469	8.478469	8.607041	311378200
2006-08-08	8.625851	8.628708	8.257279	8.295851	249466000
2006-08-09	8.406314	8.430599	8.116314	8.143457	238959700
2006-08-10	8.087785	8.310643	8.009214	8.204928	174440000
2006-08-11	8.091141	8.219712	7.998284	8.151141	194382300
2006-08-14	8.203991	8.371133	8.139705	8.188277	179405100
2006-08-15	8.351144	8.516858	8.274001	8.509715	215338200
2006-08-16	8.579934	8.718506	8.469935	8.705649	195321000
2006-08-17	8.714275	8.808561	8.597132	8.655703	145287100
2006-08-18	8.668115	8.766686	8.603829	8.696686	134088500
2006-08-21	8.629514	8.630943	8.465229	8.523801	131556600
2006-08-22	8.52526	8.759546	8.499546	8.659546	144242000
2006-08-23	8.71842	8.811277	8.566991	8.619848	134064700
2006-08-24	8.695309	8.738166	8.463881	8.683881	163797900
2006-08-25	8.602828	8.847113	8.598542	8.804256	135989700
2006-08-28	8.794732	8.810447	8.534732	8.577589	184540300
2006-08-29	8.586413	8.624984	8.31927	8.513556	236833100
2006-08-30	8.629311	8.697882	8.535025	8.575025	170035600
2006-08-31	8.607569	8.753284	8.518998	8.688998	143674300
2006-09-01	8.77116	8.795446	8.676874	8.756875	102123700
2006-09-05	8.795298	9.156726	8.735297	9.153869	253114400
2006-09-06	9.118175	9.205318	8.921033	8.968176	243525800
2006-09-07	9.008622	9.420051	8.958622	9.322908	316989400
2006-09-08	9.40848	9.437052	9.199909	9.287052	223980400
2006-09-11	9.274492	9.460206	9.130206	9.284491	237281100
2006-09-12	9.326852	9.418281	9.132567	9.301138	421171800
2006-09-13	9.309337	9.519337	9.230765	9.502194	286534500
2006-09-14	9.434068	9.569783	9.396926	9.498355	200432400
2006-09-15	9.560818	9.615104	9.373675	9.489389	245463400
2006-09-18	9.449639	9.601067	9.378211	9.462497	176319500
2006-09-19	9.494272	9.531415	9.308558	9.447129	177512300
2006-09-20	9.512227	9.697942	9.489371	9.637942	205697800
2006-09-21	9.645536	9.76125	9.469822	9.559822	198531200
2006-09-22	9.534233	9.539948	9.288519	9.34852	166278000
2006-09-25	9.423548	9.716405	9.41069	9.70069	214748100
2006-09-26	9.734599	9.96317	9.72317	9.938885	275737000
2006-09-27	9.893781	9.936638	9.700925	9.78521	202593300
2006-09-28	9.863476	9.92919	9.710619	9.862048	180902400
2006-09-29	9.87678	9.935351	9.815351	9.858208	101453100
2006-10-02	9.621004	9.731004	9.506717	9.586717	178159800
2006-10-03	9.539686	9.611114	9.359685	9.486828	197677200
2006-10-04	9.47045	9.664736	9.336164	9.653308	207270700
2006-10-05	9.540018	9.772876	9.482876	9.582876	170970800
2006-10-06	9.533327	9.621898	9.446184	9.504756	116739700
2006-10-09	9.43869	9.621548	9.400119	9.557261	109555600
2006-10-10	9.556534	9.562248	9.347963	9.452249	132897100
2006-10-11	9.405117	9.485117	9.287974	9.377975	142963800
2006-10-12	9.402228	9.656513	9.400799	9.637942	148213800
2006-10-13	9.694348	9.872919	9.567205	9.607205	171049200
2006-10-16	9.625869	9.724441	9.568727	9.655869	127173200
2006-10-17	9.620863	9.65372	9.478006	9.51372	120231300
2006-10-18	9.575884	9.664455	9.455884	9.544454	283476900
2006-10-19	10.154186	10.252758	9.997043	10.115615	378244300
2006-10-20	10.098548	10.244263	10.055691	10.238549	159853400
2006-10-23	10.221924	10.494781	10.187639	10.431924	208126800
2006-10-24	10.402276	10.469418	10.25799	10.379418	115803100
2006-10-25	10.412954	10.505812	10.364383	10.460097	121303700
2006-10-26	10.483982	10.583982	10.373982	10.52541	108189200
2006-10-27	10.488888	10.588887	10.240316	10.297459	148741600
2006-10-30	10.23731	10.36731	10.167309	10.298738	124979400
2006-10-31	10.43612	10.468976	10.261834	10.383262	125368600
2006-11-01	10.414526	10.454526	10.023097	10.137384	152798100
2006-11-02	10.105758	10.162902	10.045759	10.11433	116370800
2006-11-03	10.178827	10.203112	9.954541	10.02597	107972200
2006-11-06	10.099245	10.257817	10.02496	10.207817	108644200
2006-11-07	10.301693	10.380264	10.255979	10.310265	131483100
2006-11-08	10.211562	10.59299	10.19299	10.558704	172729200
2006-11-09	10.609823	10.865538	10.498394	10.67268	230763400
2006-11-10	10.705935	10.713077	10.555934	10.644506	93466100
2006-11-13	10.640594	10.816307	10.557737	10.802022	112668500
2006-11-14	10.856689	10.885262	10.728118	10.885262	147238700
2006-11-15	10.90646	11.027888	10.75646	10.763603	163830800
2006-11-16	10.85767	11.061955	10.821956	10.963384	173485200
2006-11-17	10.892688	11.006974	10.872689	10.994117	116606000
2006-11-20	10.920656	11.149228	10.892085	11.073514	142698500
2006-11-21	11.177716	11.346288	11.13343	11.346288	155666700
2006-11-22	11.376701	11.62813	11.213844	11.565272	167985300
2006-11-24	11.434314	11.941457	11.430028	11.734314	129669400
2006-11-27	11.890948	11.983806	11.460948	11.466663	268709000
2006-11-28	11.550223	11.780224	11.485938	11.757366	259043400
2006-11-29	11.927514	11.948943	11.534658	11.756085	289270800
2006-11-30	11.816728	11.883871	11.652443	11.738157	217621600
2006-12-01	11.763187	11.838902	11.52033	11.694616	198769900
2006-12-04	11.777575	11.801861	11.580433	11.669004	177384200
2006-12-05	11.742497	11.83964	11.631068	11.688211	165709600
2006-12-06	11.619516	11.72666	11.480945	11.503802	159546100
2006-12-07	11.57365	11.640794	11.126508	11.146508	251206900
2006-12-08	11.155605	11.464176	11.122748	11.302747	196069300
2006-12-11	11.386923	11.444066	11.265494	11.365495	124945100
2006-12-12	11.384113	11.41697	10.944114	11.031257	256655000
2006-12-13	11.246771	11.406772	11.132486	11.403915	214263000
2006-12-14	11.411314	11.547027	11.298456	11.339885	208082700
2006-12-15	11.419306	11.447877	11.177878	11.233591	184984800
2006-12-18	11.254023	11.306879	10.819737	10.945451	180394200
2006-12-19	10.82731	11.105882	10.668739	11.053025	227851400
2006-12-20	11.098815	11.127386	10.851671	10.854528	141922900
2006-12-21	10.873479	10.984908	10.516336	10.616336	225899800
2006-12-22	10.70669	10.789547	10.440976	10.52669	153325900
2006-12-26	10.529757	10.589757	10.349758	10.438329	122672200
2006-12-27	9.958181	10.508181	9.761038	10.43961	483938700
2006-12-28	10.263511	10.410653	10.182083	10.356368	279969200
2006-12-29	10.73763	10.944773	10.653344	10.864773	269107300
2007-01-03	11.087302	11.12873	10.460159	10.731588	309579900
2007-01-04	10.739785	11.011213	10.706928	10.969785	211815100
2007-01-05	10.994522	11.05595	10.798808	10.891665	208685400
2007-01-08	11.015451	11.096879	10.918309	10.945451	199276700
2007-01-09	10.980406	11.913263	10.794692	11.854692	837324600
2007-01-10	12.100578	12.536293	11.914864	12.422006	738220000
2007-01-11	12.288333	12.408333	12.168333	12.268334	360063200
2007-01-12	12.112934	12.180077	11.918648	12.11722	328172600
2007-01-16	12.231955	12.456242	12.199099	12.434812	311019100
2007-01-17	12.532338	12.538052	12.140909	12.15948	411565000
2007-01-18	11.839333	11.840761	11.403619	11.406476	591151400
2007-01-19	11.352051	11.497766	11.279195	11.333481	341118400
2007-01-22	11.450209	11.453067	10.951638	11.114495	363506500
2007-01-23	10.979194	11.23348	10.947765	10.974908	301856100
2007-01-24	11.100111	11.167254	11.014397	11.102969	231953400
2007-01-25	11.168198	11.366771	11.013913	11.045341	226493400
2007-01-26	11.181068	11.218211	10.878212	10.933926	246718500
2007-01-29	11.057069	11.10707	10.94707	11.005641	225416100
2007-01-30	11.081412	11.089983	10.912841	10.955698	144492600
2007-01-31	10.854462	11.017319	10.781605	10.978748	214017300
2007-02-01	11.064824	11.070539	10.851967	10.851967	166085500
2007-02-02	10.763252	10.924681	10.703252	10.853251	155382500
2007-02-05	10.800946	10.933803	10.749517	10.749517	144713100
2007-02-06	10.819265	10.822122	10.592123	10.776408	216098400
2007-02-07	10.793962	11.065391	10.661106	11.032534	266706300
2007-02-08	10.929231	11.083516	10.926373	11.036374	169757700
2007-02-09	11.036575	11.082288	10.655146	10.663718	215135200
2007-02-12	10.805613	10.912755	10.691327	10.869898	181017900
2007-02-13	10.912563	10.931135	10.789706	10.846849	145246500
2007-02-14	10.827968	10.972253	10.819397	10.923683	126995400
2007-02-15	10.945013	10.970727	10.850727	10.912156	90915300
2007-02-16	10.923494	10.94635	10.839208	10.863493	99967000
2007-02-20	10.821949	11.037664	10.751949	11.00052	154425600
2007-02-21	10.963125	11.464554	10.960268	11.423125	288828400
2007-02-22	11.64711	11.648538	11.322823	11.462824	209556200
2007-02-23	11.419333	11.587904	11.375047	11.406476	129473400
2007-02-26	11.524761	11.547617	11.20619	11.334761	153962200
2007-02-27	11.086809	11.198238	10.673952	10.748238	286453300
2007-02-28	10.605321	10.976751	10.605321	10.835322	229868800
2007-03-01	10.716215	11.327643	10.676215	11.149072	353882200
2007-03-02	11.132054	11.242053	10.909196	10.937767	215000100
2007-03-05	10.992878	11.387164	10.974307	11.054307	209724900
2007-03-06	11.238066	11.310923	11.180923	11.293781	180796700
2007-03-07	11.280734	11.412163	11.19502	11.233591	156571100
2007-03-08	11.353736	11.372308	11.192308	11.26945	127752800
2007-03-09	11.384179	11.391321	11.184178	11.265606	112959000
2007-03-12	11.251781	11.526066	11.240352	11.508924	182352100
2007-03-13	11.464959	11.634959	11.320674	11.320674	216972700
2007-03-14	11.325573	11.525572	11.22843	11.525572	199146500
2007-03-15	11.526221	11.583363	11.433364	11.470506	139874700
2007-03-16	11.465923	11.530208	11.434494	11.473066	142926000
2007-03-19	11.543139	11.730281	11.450282	11.670282	178240300
2007-03-20	11.696534	11.766534	11.655106	11.715105	122229100
2007-03-21	11.752601	12.039744	11.704029	12.021172	171724000
2007-03-22	11.999841	12.089841	11.895555	12.032698	140373100
2007-03-23	11.952063	12.05492	11.94492	11.976349	112721000
2007-03-26	12.00902	12.281877	11.910448	12.274734	216246800
2007-03-27	12.260506	12.420506	12.159077	12.224792	233013200
2007-03-28	12.174778	12.249064	11.927635	11.940492	235584300
2007-03-29	12.068661	12.068661	11.788661	12.005805	181430900
2007-03-30	12.093946	12.151088	11.875374	11.898231	150139500
2007-04-02	12.062998	12.078713	11.902998	11.992999	125498100
2007-04-03	12.050422	12.206136	11.996137	12.101851	145983600
2007-04-04	12.168112	12.196684	12.052398	12.072398	119196000
2007-04-05	12.044902	12.124902	11.959188	12.124902	88879000
2007-04-09	12.215856	12.228712	11.905856	11.992999	103335400
2007-04-10	11.986982	12.071267	11.949839	12.069839	88116700
2007-04-11	12.044394	12.051537	11.820108	11.857251	137254600
2007-04-12	11.784598	11.82317	11.596027	11.806027	164168900
2007-04-13	11.650591	11.72202	11.530591	11.556306	179985400
2007-04-16	11.585845	11.718702	11.540132	11.708703	152258400
2007-04-17	11.80611	11.848967	11.477537	11.570395	187980100
2007-04-18	11.542511	11.641083	11.462511	11.576797	116011000
2007-04-19	11.548721	11.700149	11.497292	11.56015	106478400
2007-04-20	11.638365	11.679794	11.589795	11.649794	130694900
2007-04-23	11.700786	12.0165	11.6765	11.975071	195072500
2007-04-24	12.043349	12.390492	11.663349	11.940492	263813200
2007-04-25	12.05071	12.217853	11.989281	12.210709	296786000
2007-04-26	13.04907	13.180499	12.580498	12.657641	434444500
2007-04-27	12.547375	12.800232	12.477375	12.795946	174850900
2007-04-30	12.82201	12.95201	12.762009	12.780581	154127400
2007-05-01	12.755462	12.864033	12.60689	12.738319	133130900
2007-05-02	12.750423	12.877566	12.724709	12.856138	126286300
2007-05-03	12.904558	13.007415	12.801701	12.857415	144019400
2007-05-04	12.908494	13.02278	12.865636	12.909922	95496800
2007-05-07	12.902482	13.369625	12.892482	13.308197	215389300
2007-05-08	13.22704	13.46704	13.219897	13.454184	195999300
2007-05-09	13.405828	13.698685	13.40297	13.687257	179439400
2007-05-10	13.644737	13.960452	13.543309	13.746166	299314400
2007-05-11	13.782597	13.981168	13.645454	13.925454	163424100
2007-05-14	14.041995	14.096281	13.846281	14.004852	162986600
2007-05-15	14.062074	14.152074	13.620646	13.769217	238628600
2007-05-16	13.916166	13.959023	13.186165	13.746166	281691900
2007-05-17	13.687955	14.076526	13.687955	14.015098	183822800
2007-05-18	14.119373	14.177945	14.053659	14.089373	155336300
2007-05-21	14.101805	14.407518	14.064662	14.340376	159973100
2007-05-22	14.39015	14.57015	14.321579	14.540149	143102400
2007-05-23	14.618342	14.758342	14.414056	14.456912	227843700
2007-05-24	14.478031	14.713745	14.129459	14.175173	221840500
2007-05-25	14.318967	14.573253	14.247539	14.550395	158239900
2007-05-29	14.658168	14.716739	14.40674	14.643882	161423500
2007-05-30	14.571343	15.225629	14.461343	15.209914	369611200
2007-05-31	15.359823	15.659824	15.284109	15.519823	324266600
2007-06-01	15.548244	15.561102	15.146816	15.162531	221315500
2007-06-04	15.15204	15.594895	15.047753	15.537753	221668300
2007-06-05	15.529361	15.712218	15.39936	15.709361	230196400
2007-06-06	15.642147	15.892147	15.592148	15.833576	278060300
2007-06-07	16.020075	16.39436	15.762932	15.888645	478769900
2007-06-08	16.132431	16.13386	15.628145	15.942432	310420600
2007-06-11	16.221762	16.243191	15.298905	15.391762	468564600
2007-06-12	15.268947	15.60609	15.120376	15.416092	356641600
2007-06-13	15.568703	15.574418	14.747275	15.047276	430338300
2007-06-14	14.985925	15.307353	14.874496	15.207353	243316500
2007-06-15	15.448605	15.455748	15.340035	15.431462	202804700
2007-06-18	15.760692	16.032119	15.654977	16.019264	227651200
2007-06-19	15.983281	16.028996	15.728995	15.836138	235756500
2007-06-20	15.897354	16.01021	15.558782	15.565925	224378000
2007-06-21	15.552587	15.922587	15.412587	15.866874	216761300
2007-06-22	15.873046	15.95876	15.663045	15.751616	157969000
2007-06-25	15.931382	16.059955	15.484239	15.667096	241350900
2007-06-26	15.941182	15.944039	15.189753	15.322611	336251300
2007-06-27	15.426606	15.630892	15.23375	15.609463	243674200
2007-06-28	15.696286	15.714857	15.359143	15.439143	209535900
2007-06-29	15.618678	15.908677	15.492963	15.628678	284460400
2007-07-02	15.498786	15.647359	15.248786	15.528787	248715600
2007-07-03	15.547062	16.318491	15.475633	16.285633	290620400
2007-07-05	16.435936	17.03165	16.420221	17.000221	363262900
2007-07-06	17.061161	17.09116	16.67116	16.942589	218673700
2007-07-09	16.983167	17.057453	16.526026	16.690311	248955000
2007-07-10	16.453281	17.256138	16.443281	16.948996	313751900
2007-07-11	16.908408	17.141264	16.799836	16.954121	205443000
2007-07-12	17.137832	17.193546	16.92926	17.16926	176152200
2007-07-13	17.252257	17.655114	17.179398	17.63797	226901500
2007-07-16	17.726783	17.953926	17.59964	17.685354	234028200
2007-07-17	17.70194	17.887655	17.587654	17.789083	177489900
2007-07-18	17.697916	17.733631	17.390774	17.687916	189214200
2007-07-19	17.971523	18.044382	17.878668	17.928667	183222900
2007-07-20	18.108902	18.470331	17.873188	18.408903	291943400
2007-07-23	18.346781	18.619638	18.00678	18.402496	259122500
2007-07-24	17.844271	18.147128	17.168557	17.274271	448823200
2007-07-25	17.590641	17.734927	17.254927	17.577784	374045700
2007-07-26	18.684184	19.054183	17.405612	18.697041	546657300
2007-07-27	18.755993	19.145994	18.411709	18.421707	290274600
2007-07-30	18.526086	18.686086	17.846086	18.111801	276747100
2007-07-31	18.474863	18.54772	16.839149	16.873434	440598200
2007-08-01	17.094075	17.342646	16.255503	17.288361	437539200
2007-08-02	17.502034	17.546319	17.144891	17.479176	213161200
2007-08-03	17.372109	17.470681	16.834967	16.884966	169796900
2007-08-06	16.984654	17.323226	16.327511	17.320368	231292600
2007-08-07	17.279346	17.607918	16.949347	17.292204	237484100
2007-08-08	17.554444	17.568728	16.874443	17.161585	202024200
2007-08-09	16.860031	17.130031	16.000032	16.185745	281348900
2007-08-10	15.739167	16.400595	15.33631	16.007738	352687300
2007-08-13	16.440751	16.587893	16.18075	16.365036	188227900
2007-08-14	16.492092	16.49352	15.837806	15.88352	184751700
2007-08-15	15.760337	16.063194	15.318908	15.354622	248213000
2007-08-16	14.983932	15.19679	14.213932	14.989646	466672500
2007-08-17	15.624092	15.836949	15.311236	15.631235	298765600
2007-08-20	15.900299	15.977444	15.406014	15.651728	200829300
2007-08-21	15.571146	16.535433	15.398291	16.336861	325761800
2007-08-22	16.785198	17.003769	16.658056	16.969484	265441400
2007-08-23	17.073644	17.109358	16.597931	16.785072	216709500
2007-08-24	16.645348	17.336778	16.542491	17.326777	227958500
2007-08-27	17.099045	17.280474	16.91476	16.936188	176859900
2007-08-28	16.836524	17.039382	16.213668	16.240812	294841400
2007-08-29	16.570538	17.184824	16.521967	17.170538	291715200
2007-08-30	16.937012	17.734154	16.884154	17.448439	358895600
2007-08-31	17.878301	17.901159	17.581157	17.734016	219221800
2007-09-04	17.858547	18.68569	17.844261	18.461405	329210700
2007-09-05	18.686605	18.810892	17.419464	17.51375	582055600
2007-09-06	17.368208	17.65535	16.961063	17.289637	475315400
2007-09-07	16.909004	16.950432	16.62186	16.874718	357644000
2007-09-10	17.547342	17.697341	17.113056	17.507343	371959700
2007-09-11	17.695396	17.752538	17.102538	17.35111	242971400
2007-09-12	17.402422	17.889565	17.368136	17.525278	255692500
2007-09-13	17.802952	17.827238	17.491524	17.570095	164040800
2007-09-14	17.456274	17.80056	17.403418	17.776274	151830000
2007-09-17	17.807911	18.036482	17.609339	17.725054	198342900
2007-09-18	17.780769	18.322197	17.605055	18.046482	266022400
2007-09-19	18.348705	18.368705	17.831562	18.027277	256720100
2007-09-20	17.945511	18.179796	17.826939	17.968367	172960200
2007-09-21	18.030123	18.531552	17.911551	18.460123	284720100
2007-09-24	18.767593	19.213308	18.756166	18.989023	263040400
2007-09-25	18.710808	19.622237	18.707951	19.616522	298137700
2007-09-26	19.806876	19.882591	19.346877	19.56402	243817000
2007-09-27	19.681282	19.788426	19.47414	19.785568	164549700
2007-09-28	19.649378	19.815092	19.550806	19.653664	153775300
2007-10-01	19.776918	20.174061	19.534061	20.021204	209267100
2007-10-02	20.019984	20.311412	19.925698	20.291412	198017400
2007-10-03	20.203538	20.403537	20.093537	20.223536	173129600
2007-10-04	20.259824	20.271253	19.616968	20.008396	164239600
2007-10-05	20.235602	20.694172	20.139887	20.6756	235867800
2007-10-08	20.871446	21.502874	20.79716	21.502874	208982200
2007-10-09	21.83076	21.960761	21.327903	21.496475	276071600
2007-10-10	21.468019	21.515161	21.189447	21.359447	166897500
2007-10-11	21.812626	22.154055	19.486912	20.775484	410998000
2007-10-12	20.812643	21.422641	20.639785	21.418356	247044000
2007-10-15	21.526637	21.753779	20.886637	21.38378	269482500
2007-10-16	21.139597	21.802454	21.083883	21.71674	266957600
2007-10-17	22.114126	22.164125	21.612697	22.122698	281903300
2007-10-18	21.933029	22.317314	21.868744	22.218744	205919000
2007-10-19	22.370025	22.425741	21.764312	21.824312	322945000
2007-10-22	21.756021	22.406021	21.700308	22.328878	412374900
2007-10-23	24.182865	24.18858	23.354294	23.840008	448791000
2007-10-24	23.793412	23.993413	22.854842	23.810555	322120400
2007-10-25	23.705733	23.852875	23.247162	23.407162	243400500
2007-10-26	23.737323	23.748752	23.393037	23.653038	176719200
2007-10-29	23.754416	23.917273	23.647273	23.702988	135138500
2007-10-30	23.830436	24.286149	23.623292	23.947578	234853500
2007-10-31	23.993936	24.349651	23.61108	24.325365	208327700
2007-11-01	24.169646	24.383931	22.941073	24.003931	201259100
2007-11-02	24.250425	24.283281	23.43328	24.058996	250528600
2007-11-05	23.715429	24.239716	23.56543	23.842573	201044200
2007-11-06	23.883854	24.590998	23.629568	24.560997	238681800
2007-11-07	24.473651	24.769366	23.833651	23.857937	248581900
2007-11-08	24.071026	24.103884	21.371025	22.471025	472594500
2007-11-09	22.003309	22.570451	21.154737	21.177595	381595200
2007-11-12	21.33652	21.682235	19.243663	19.690805	442266300
2007-11-13	20.463979	21.911122	19.451122	21.765409	434861700
2007-11-14	22.850937	22.90951	20.933794	21.272366	362292000
2007-11-15	21.339145	21.796287	20.469145	21.040573	371852600
2007-11-16	21.15251	21.398225	20.299653	21.308224	345873500
2007-11-19	21.302896	21.602897	20.731468	20.995754	288607200
2007-11-20	21.168973	22.04326	20.863259	21.623259	385910700
2007-11-21	21.199028	22.129028	21.031885	21.573313	304452400
2007-11-23	22.033457	22.0406	21.712029	21.967743	116439400
2007-11-26	22.24581	22.771525	22.068668	22.09581	326438700
2007-11-27	22.445075	22.526504	21.70079	22.386503	329257600
2007-11-28	22.593607	23.133606	22.383606	23.079321	287728000
2007-11-29	22.906246	23.726248	22.866247	23.600533	262731700
2007-11-30	24.066873	24.118301	22.975445	23.335445	296950500
2007-12-03	23.333729	23.659443	22.739443	22.905157	240367400
2007-12-04	22.646811	23.182526	22.623955	23.026812	193449900
2007-12-05	23.382631	23.826917	23.31406	23.755489	223100500
2007-12-06	23.788223	24.346794	23.778223	24.325365	224952700
2007-12-07	24.345283	24.980999	23.988142	24.882427	266516600
2007-12-10	24.782335	25.07805	24.653764	24.870907	180594400
2007-12-11	25.031938	25.329082	23.98051	24.144796	277731300
2007-12-12	24.810468	24.959041	23.713327	24.441898	306415200
2007-12-13	24.331837	24.607552	23.993266	24.566122	216154400
2007-12-14	24.378853	24.783138	24.260281	24.38171	168578200
2007-12-17	24.517473	24.793188	23.411758	23.614616	256173400
2007-12-18	23.938487	24.054202	22.807059	23.432772	305650800
2007-12-19	23.430702	23.667845	23.13356	23.450703	206869600
2007-12-20	23.720184	24.063041	23.420185	23.97447	193514300
2007-12-21	24.291058	24.832487	24.2582	24.832487	248490200
2007-12-24	24.920141	25.534426	24.885855	25.458712	120050700
2007-12-26	25.486492	25.765062	25.173636	25.477921	175933100
2007-12-27	25.48354	26.056397	25.319254	25.429255	198881900
2007-12-28	25.699186	25.837757	25.169185	25.590614	174911800
2007-12-31	25.569361	25.712218	25.319361	25.366503	134833300
2008-01-02	25.584438	25.725868	24.624439	24.951582	269794700
2008-01-03	25.031679	25.314537	24.643108	24.963108	210516600
2008-01-04	24.686119	24.907547	22.891833	23.057547	363958000
2008-01-07	23.264632	23.600346	21.690346	22.748917	518048300
2008-01-08	23.200607	23.532036	21.866322	21.930607	380954000
2008-01-09	21.817165	22.988594	21.388593	22.974308	453470500
2008-01-10	22.734724	23.223295	22.424723	22.797581	370743800
2008-01-11	22.587872	22.852158	21.73073	22.115015	308071400
2008-01-14	22.714909	22.986336	22.379194	22.894909	275112600
2008-01-15	22.887589	23.101876	21.021876	21.647589	585819500
2008-01-16	21.242376	21.782375	20.023804	20.443804	553461300
2008-01-17	20.692456	21.242457	20.251027	20.603884	439464900
2008-01-18	20.714071	21.291214	20.41407	20.66407	431085900
2008-01-22	18.8487	20.551558	18.554415	19.931557	608688500
2008-01-23	17.398143	17.942428	15.962428	17.809572	843242400
2008-01-24	17.99234	18.093769	16.852341	17.365198	501466700
2008-01-25	17.932188	17.946474	16.592188	16.64933	388684800
2008-01-28	16.385044	17.105045	16.140758	16.64933	368711000
2008-01-29	16.78955	17.023835	16.489551	16.845266	274995700
2008-01-30	16.811512	17.394369	16.615797	16.927225	310762900
2008-01-31	16.490177	17.518749	16.483034	17.334463	336418600
2008-02-01	17.483992	17.533993	16.903992	17.128279	252686000
2008-02-04	17.225069	17.466498	16.826498	16.859354	224808500
2008-02-05	16.718946	17.228947	16.500376	16.56609	285260500
2008-02-06	16.884984	17.040698	15.590697	15.623555	393318100
2008-02-07	15.344796	16.031939	14.959082	15.526225	520832900
2008-02-08	15.583497	16.10064	15.514925	16.06921	338993200
2008-02-11	16.371903	16.65333	16.256188	16.577616	300358100
2008-02-12	16.824099	16.866955	15.81267	15.989813	306495000
2008-02-13	16.182646	16.625504	16.032647	16.571217	242133500
2008-02-14	16.599915	16.799916	16.258486	16.322771	238524300
2008-02-15	16.194642	16.310355	15.878927	15.960355	225325100
2008-02-19	16.190889	16.299461	15.54089	15.646605	251261500
2008-02-20	15.6252	15.968055	15.550912	15.856628	241859800
2008-02-21	16.208931	16.26893	15.467503	15.564646	234528700
2008-02-22	15.729706	15.733992	14.785419	15.298277	382469500
2008-02-25	15.169849	15.395563	14.894134	15.334135	314193600
2008-02-26	15.042864	15.535721	14.728578	15.258579	376222000
2008-02-27	15.07078	15.759352	15.050782	15.746495	368784500
2008-02-28	16.249378	16.963663	16.045091	16.63652	404563600
2008-02-29	16.620298	16.751728	15.97887	16.0103	313870200
2008-03-03	15.976119	16.196119	15.056119	15.588975	398260800
2008-03-04	15.583361	15.996218	15.356219	15.959074	446345900
2008-03-05	15.812431	16.035288	15.622431	15.942432	305459000
2008-03-06	16.012241	16.425098	15.469385	15.486528	368424700
2008-03-07	15.392712	15.759854	15.198426	15.655568	307615700
2008-03-10	15.654872	15.8663	15.282014	15.32773	249897200
2008-03-11	15.844396	16.327253	15.544397	16.308683	290985800
2008-03-12	16.283926	16.518211	16.016783	16.139641	264907300
2008-03-13	15.835673	16.607102	15.67853	16.384245	315525700
2008-03-14	16.681065	16.741066	15.869637	16.213923	289160200
2008-03-17	15.632145	16.495003	15.632145	16.229288	268149700
2008-03-18	16.489182	17.034895	16.416323	17.00918	301280000
2008-03-19	17.098648	17.265791	16.605791	16.605791	252634200
2008-03-20	16.759665	17.069667	16.482524	17.066809	227196900
2008-03-24	17.079906	18.05705	17.02705	17.868479	266730100
2008-03-25	17.908454	18.357026	17.53274	18.054167	263097800
2008-03-26	17.978092	18.673805	17.945234	18.576662	295521100
2008-03-27	18.632115	18.683543	17.923542	17.960686	249957400
2008-03-28	18.141278	18.548421	18.112706	18.314135	178652600
2008-03-31	18.344028	18.6926	18.236887	18.376886	192016300
2008-04-01	18.687676	19.167675	18.303391	19.149105	258141800
2008-04-02	19.072142	19.417856	18.65357	18.887856	261242100
2008-04-03	18.765469	19.704041	18.756897	19.415468	262892000
2008-04-04	19.476576	19.836577	19.270863	19.60372	213604300
2008-04-07	19.997862	20.506434	19.852148	19.963577	289581600
2008-04-08	19.674416	20.088701	19.498701	19.572987	253573600
2008-04-09	19.660837	19.743694	19.253695	19.393694	218349600
2008-04-10	19.303398	19.916256	19.227684	19.791969	238940800
2008-04-11	19.640173	19.723031	18.737317	18.843031	302519000
2008-04-14	18.780707	19.134993	18.462136	18.924994	211271900
2008-04-15	19.147538	19.193252	18.621823	19.001825	174509300
2008-04-16	19.400261	19.740261	19.243118	19.683119	198943500
2008-04-17	19.738571	20	19.621428	19.784285	176066800
2008-04-18	20.348807	20.797379	20.243092	20.623093	256691400
2008-04-21	20.68489	21.583461	20.620605	21.534891	259788200
2008-04-22	21.544088	21.629802	20.214088	20.515516	359893100
2008-04-23	21.025725	21.138581	20.601439	20.86001	376047700
2008-04-24	21.120501	21.783358	20.241928	21.634785	424016600
2008-04-25	21.874521	21.931665	21.263093	21.73595	248118500
2008-04-28	21.701675	22.273103	21.613103	22.05739	196803600
2008-04-29	21.854383	22.504383	21.731525	22.41724	230869100
2008-04-30	22.596373	23.140658	22.129231	22.276373	284881100
2008-05-01	22.331145	23.051144	22.316859	23.051144	225894200
2008-05-02	23.064378	23.311521	22.830093	23.171522	251520500
2008-05-05	23.255451	23.739737	23.131166	23.656879	213639300
2008-05-06	23.618322	23.969751	23.264038	23.904037	229717600
2008-05-07	23.877115	24.184258	23.089974	23.38283	289283400
2008-05-08	23.514853	23.904853	23.414853	23.699139	224771400
2008-05-09	23.451536	23.60725	23.195822	23.492966	168268100
2008-05-12	23.674703	24.197561	23.337562	24.096132	204640800
2008-05-13	24.133787	24.539501	24.026644	24.326643	205809100
2008-05-14	24.562815	24.7071	23.754244	23.852816	229205900
2008-05-15	23.880049	24.321477	23.507191	24.297192	218302000
2008-05-16	24.382696	24.40984	23.93841	24.026981	191442300
2008-05-19	24.120743	24.239315	23.1836	23.512171	236455100
2008-05-20	23.223856	23.843857	22.980999	23.806713	242462500
2008-05-21	23.887924	24.213638	22.54221	22.819353	289414300
2008-05-22	22.989081	23.284794	21.951937	22.673365	301683900
2008-05-23	23.143837	23.318122	22.719551	23.200979	226729300
2008-05-27	23.348871	23.874584	23.21887	23.874584	197476300
2008-05-28	24.006002	24.083144	23.478858	23.948858	185994900
2008-05-29	23.917881	24.123595	23.737881	23.907881	161796600
2008-05-30	23.985973	24.284544	23.975973	24.171686	152546100
2008-06-02	24.189467	24.339466	23.608038	23.832323	169960000
2008-06-03	23.951698	24.143126	23.305983	23.73884	187630100
2008-06-04	23.548645	23.987215	23.435787	23.715788	181745900
2008-06-05	23.817343	24.317343	23.725914	24.25877	188861400
2008-06-06	24.110558	24.389129	23.760558	23.773415	241605700
2008-06-09	23.711611	23.73304	22.420183	23.257326	472098200
2008-06-10	23.040559	23.936273	22.827701	23.773415	285235300
2008-06-11	23.659157	23.896299	22.980585	23.154871	240387700
2008-06-12	23.363723	23.522294	21.893724	22.188009	327083400
2008-06-13	21.969751	22.32975	21.065466	22.074038	336489300
2008-06-16	21.855044	22.797902	21.536473	22.646473	262932600
2008-06-17	22.758563	23.314276	22.659991	23.234276	224914200
2008-06-18	23.229643	23.383928	22.69107	22.891071	202867000
2008-06-19	22.830685	23.372113	22.580685	23.166399	197987300
2008-06-20	23.028272	23.263986	22.406843	22.445415	222091800
2008-06-23	22.400918	22.563775	21.946634	22.175205	161445200
2008-06-24	22.061015	22.548157	21.9553	22.186728	155486800
2008-06-25	22.319763	22.922619	22.215477	22.716906	161112700
2008-06-26	22.377697	22.487695	21.511982	21.547697	217402500
2008-06-27	21.270624	21.850624	20.933481	21.782051	260562400
2008-06-30	21.835545	22.094116	21.325544	21.442688	171049200
2008-07-01	20.876997	22.375568	20.844141	22.369856	277820200
2008-07-02	22.540314	22.861742	21.537457	21.537457	209379800
2008-07-03	21.710178	22.078751	21.161608	21.785892	130840500
2008-07-07	22.145619	22.712761	21.965618	22.431334	205097900
2008-07-08	22.400657	23.014944	22.020658	22.993515	222087600
2008-07-09	23.164789	23.266218	22.299074	22.314789	223944000
2008-07-10	22.375293	22.721008	21.86815	22.619579	210172200
2008-07-11	22.513786	22.748072	21.875216	22.100929	232502900
2008-07-14	23.033118	23.041689	22.153117	22.267403	221513600
2008-07-15	22.130142	22.310143	21.260143	21.724428	260010800
2008-07-16	21.757523	22.147525	21.528952	22.130381	186947600
2008-07-17	22.32946	22.455174	21.942316	22.002316	189381500
2008-07-18	21.63086	21.792288	21.128002	21.149431	217103600
2008-07-21	21.382559	21.468274	20.556845	21.295416	340117400
2008-07-22	18.88859	20.854304	18.535733	20.748589	469898100
2008-07-23	21.110142	21.592998	20.620142	21.291571	265442100
2008-07-24	21.1214	21.255687	20.282829	20.365686	209904800
2008-07-25	20.515686	20.887115	20.265686	20.7614	158409300
2008-07-28	20.907047	20.925617	19.718475	19.77276	195178200
2008-07-29	19.877399	20.454542	19.625971	20.115971	171017700
2008-07-30	20.174542	20.561684	19.931683	20.474541	181295800
2008-07-31	20.154016	20.819731	20.074016	20.355446	159374600
2008-08-01	20.525039	20.537897	19.932182	20.062181	136159800
2008-08-04	20.104361	20.290074	19.577218	19.622931	148131900
2008-08-05	19.826155	20.594725	19.740441	20.571869	172092900
2008-08-06	20.423628	21.485056	20.142198	21.026485	197852200
2008-08-07	20.824232	21.31566	20.651374	20.94709	168093100
2008-08-08	20.900041	21.727184	20.884327	21.712898	178499300
2008-08-11	21.727855	22.646427	21.670713	22.226427	222826100
2008-08-12	22.173812	22.998098	22.172384	22.632383	209069700
2008-08-13	22.772932	23.061503	22.475789	22.961504	210586600
2008-08-14	22.822636	23.125494	22.752636	22.964066	177825200
2008-08-15	22.977034	23.078463	22.407034	22.505606	177062900
2008-08-18	22.486494	22.806493	22.236494	22.460779	138003600
2008-08-19	22.366871	22.728298	21.97687	22.222586	154051100
2008-08-20	22.365555	22.675556	22.199841	22.518414	126737800
2008-08-21	22.345627	22.485626	21.977055	22.319912	134936200
2008-08-22	22.5015	22.741499	22.465785	22.64007	109902800
2008-08-25	22.61137	22.622798	21.969942	22.097084	121106300
2008-08-26	22.110957	22.413814	22.089528	22.236671	111387500
2008-08-27	22.174292	22.524292	22.014292	22.368578	119445200
2008-08-28	22.469475	22.608046	22.108046	22.249474	107846200
2008-08-29	22.200334	22.277479	21.640335	21.710335	149822400
2008-09-02	22.169755	22.326899	21.112612	21.282612	195190800
2008-09-03	21.364077	21.626934	20.958363	21.38122	183708700
2008-09-04	21.308998	21.601855	20.587569	20.646141	185846500
2008-09-05	20.285815	20.830102	20.15153	20.512957	196721000
2008-09-08	21.173537	21.219251	19.300679	20.223536	261494800
2008-09-09	20.164435	20.607293	19.154435	19.424435	311256400
2008-09-10	19.516897	19.898325	19.01404	19.415468	243285700
2008-09-11	18.91008	19.597224	18.598652	19.548651	242783800
2008-09-12	19.354968	19.354968	18.724969	19.07354	198256800
2008-09-15	18.213344	19.021915	17.974771	17.974771	230158600
2008-09-16	17.053299	18.287584	16.809012	17.913298	299959100
2008-09-17	17.89301	17.895868	16.370153	16.370153	300113800
2008-09-18	16.668959	17.363245	15.256102	17.171816	419063400
2008-09-19	18.286634	18.515205	17.388062	18.045204	357718900
2008-09-22	18.052516	18.096803	16.726802	16.782516	214178300
2008-09-23	16.959085	17.523371	16.217657	16.243372	320091100
2008-09-24	16.277134	16.802849	15.974276	16.482847	261753800
2008-09-25	16.590921	17.303779	16.408066	16.895208	251511400
2008-09-26	15.946941	16.645511	15.674083	16.422655	281612800
2008-09-29	15.531225	15.539796	12.812653	13.479796	655514300
2008-09-30	13.78266	14.746946	13.504089	14.555517	406670600
2008-10-01	14.374114	14.436971	13.726972	13.974115	324121000
2008-10-02	13.948999	14.060428	12.804713	12.818999	402341100
2008-10-03	13.420971	13.778115	12.085257	12.430972	573599600
2008-10-06	11.68514	12.659425	11.053711	12.567997	526854300
2008-10-07	13.035141	13.180856	11.387999	11.417999	469693000
2008-10-08	10.944393	12.432965	10.911536	11.498679	551935300
2008-10-09	12.022786	12.372787	11.0585	11.364215	404345900
2008-10-10	10.81068	12.853537	10.710681	12.396394	554824900
2008-10-13	13.304395	14.15868	12.800109	14.120109	384769000
2008-10-14	15.068684	15.088683	13.194397	13.328683	495248600
2008-10-15	13.385096	13.836524	12.535095	12.543667	396043900
2008-10-16	12.745372	13.268229	11.598229	13.04823	495130300
2008-10-17	12.787517	13.136088	10.828945	12.473231	440556900
2008-10-20	12.797848	12.833562	11.920705	12.606419	387292500
2008-10-21	12.496386	12.6321	11.669243	11.716386	548415000
2008-10-22	12.476786	13.031072	11.8425	12.405358	562202200
2008-10-23	12.333808	12.725237	11.675237	12.579522	418857600
2008-10-24	11.478321	12.55975	11.446893	12.342608	397514600
2008-10-27	12.218937	12.584651	11.760365	11.793222	302192800
2008-10-28	12.154667	12.878952	11.717524	12.794667	408533300
2008-10-29	12.861731	14.101731	12.730303	13.388875	487744600
2008-10-30	13.818568	14.384282	13.729996	14.219996	409522400
2008-10-31	13.751038	14.233895	13.428181	13.778181	414939000
2008-11-03	13.55036	14.003217	13.397503	13.697503	264484500
2008-11-04	14.070737	14.32788	13.596451	14.213594	349670300
2008-11-05	14.030224	14.145938	13.184509	13.228795	314113800
2008-11-06	12.969508	13.216651	12.533793	12.690936	329768600
2008-11-07	12.723662	12.810805	12.220805	12.580805	273813400
2008-11-10	12.891435	12.924292	12.081435	12.278578	280955500
2008-11-11	12.142144	12.479287	11.777858	12.136429	306134500
2008-11-12	11.87094	11.986654	11.525225	11.54094	294744100
2008-11-13	11.411721	12.350292	10.86172	12.350292	463521800
2008-11-14	12.059163	12.09202	11.522019	11.556306	351316700
2008-11-17	11.335949	11.631664	11.161663	11.287378	290631600
2008-11-18	11.475475	11.668331	11.078331	11.514046	302423800
2008-11-19	11.500465	11.806179	11.039036	11.050465	292975200
2008-11-20	10.986278	11.159135	10.237707	10.307706	429203600
2008-11-21	10.482497	10.795354	10.083926	10.575354	392317800
2008-11-24	10.797643	12.166215	10.744786	11.903357	360564400
2008-11-25	12.175165	12.186593	11.250879	11.628022	308823200
2008-11-26	11.440171	12.201598	11.43017	12.165884	224959000
2008-11-28	12.157497	12.166069	11.751783	11.867497	74443600
2008-12-01	11.727118	11.86569	11.387118	11.388547	230941900
2008-12-02	11.493316	11.867602	10.98903	11.841888	287180600
2008-12-03	11.352565	12.32828	11.266852	12.281137	334670000
2008-12-04	12.13757	12.248999	11.370427	11.706142	272842500
2008-12-05	11.516391	12.107819	11.303533	12.03782	260948800
2008-12-08	12.421762	12.92462	12.210335	12.770334	296285500
2008-12-09	12.525302	13.319588	12.406731	12.813874	300874000
2008-12-10	12.52839	12.759819	12.332676	12.576962	234511900
2008-12-11	12.501599	13.057313	12.141599	12.165884	260154300
2008-12-12	11.803219	12.688934	11.764648	12.584647	260293600
[truncated: 2,301 more rows]
