# Supplementary material for: An Empirical Study of Machine Learning Algorithms for Stock Daily Trading Strategy
Source: Hindawi journal article supplement (doi:10.1155/2019/7816154), 2019-01-01
Supplement: f1 [file 7816154.f1.zip › Optional Supplementary Materials(Data, code, and results)/SPICS/AAPL_TechIndi.csv]

	ATR	ADX	OBV	WR	RSI	CMF	BandPer	BandWid	CO	DIS	EOM	FI	MAO	MFI	MI	MOM	NCO	PO	PSY	RMI	ROC	SROC	SONAR	SONSIG	TRIX	VMA	VOS	VROC	Return	Sigma	CCI	RSV	Kvalue	Dvalue	Jvalue	MACD	AD	VOLA	NBIAS	Ret	SMA_5	SMA_10	EMA_5	EMA_10	Label
2001-03-26	0.105960428571429	18.496316380672	691014800	0.36941118406372	57.7267399349025	0.115521235927692	0.847419652670331	0.230516465285385	47057618.6991273	107.680474537369	-1.56451241416722e-11	3226996.30679998	0.0318194679487191	51.0321743860294	207.481857091846	111.335407941523	0.0619489999999998	0.0298560888218551	0.6	13.8995631624177	0.0454376443377431	97.5483381168595	0.0658813416650665	0.0456715693951712	0.273010582398747	118923910	13.0948033581977	0.0036130214874639	0.0020154134978325	0.0484861223060024	142.835143312702	0.63058881593628	0.701128126701793	0.664168001679733	0.775048376745915	2.92848842133335	1121664331.09278	0.380442039711064	3.07616084365236	-0.0545022655292123	1.3602418	1.3196303	1.3766470679267	1.34108800247328	1
2001-03-27	0.107399857142857	18.6192967734738	826970200	0.186184916924159	61.6619851627072	0.121760096536016	1.00715357707818	0.245617182271848	60578649.3770229	112.100950473656	-3.3611133430522e-12	-2427296.7614	0.0362687820512833	58.2697239277562	192.171546024843	111.902114649409	0.167761	0.0429614644538243	0.6	4.02691462235118	0.121671130513304	97.0353680551173	0.0832613153831383	0.0531895185927646	0.349866066437121	121365230	11.6335857228787	0.259460472075819	0.00642071345546914	0.0499313849198483	138.502828408791	0.813815083075841	0.738690445493143	0.689008816284203	0.838053703911022	3.49221167877234	1215057016.48046	0.270025684190049	6.29998050957482	0.0488340742613748	1.4009974	1.3408085	1.40589404528447	1.36350618384177	0
2001-03-28	0.1101055	18.4018499647625	680804600	0.303850970158854	57.9322774587166	0.183166928600267	0.835841647117668	0.241519742558051	74472928.4731404	107.635753689004	-1.40497062920414e-11	1468791.41500001	0.0456846153846167	55.0135419143052	192.715391609894	112.609530306756	0.22699	0.0527501597198742	0.5	4.7252532964652	0.174235383608828	96.9842822467575	0.0930859834305893	0.0611688115603296	0.414916753440209	122320590	10.933756618457	1.04871167273708	0.00570503544536399	0.0504177204313992	85.3500639395359	0.696149029841146	0.724509973609144	0.700842535392517	0.771844850042399	3.61950138325333	1264751560.6572	0.0571080303342735	1.10211175570836	-0.0310855122127595	1.4271862	1.3519019	1.41045169685631	1.37369905950691	1
2001-03-29	0.116206214285714	18.8263204812321	834071000	0.243336474875104	59.2958823560532	0.148638745867408	0.880549846564504	0.22918277800546	75953622.802574	108.388973464192	2.84126667488767e-11	-1509172.2856	0.0525176794871807	60.9016440779771	191.714023408344	114.802547811251	0.190012	0.0477302301025638	0.6	3.08371636825202	0.141233337346398	96.8657088998975	0.104235907782082	0.0697822308046801	0.4733791562471	125853140	10.6503722314475	0.717576299788529	0.00879542851506844	0.0495759914962748	92.3024350655912	0.756663525124896	0.735227824114395	0.712304298299809	0.781074875743565	3.80783574554004	1273398283.02125	0.0781091749137712	0.899441152577191	0.0161076229455969	1.4387758	1.3701027	1.42117379790421	1.3862297759602	0
2001-03-30	0.113263857142857	19.0998181744705	733983600	0.320663031579058	56.7638718571072	0.154491878796486	0.757817903042881	0.225242943316426	71330807.5064971	105.460543183033	-2.79534684535717e-11	292434.709699996	0.0532062051282065	60.3684405598291	186.343304954916	107.331253792807	0.10453	0.0288098532027539	0.6	2.08612838593844	0.0768473735193071	97.0065698221526	0.11226237641423	0.07827825992659	0.513655578049188	125779990	7.29403250858483	0.023579455820034	0.0130689235336774	0.0435186620349252	57.5328502949673	0.679336968420942	0.716597538883244	0.713735378494287	0.722321859661156	3.73633163554812	1279201201.63829	0.0566427039619468	-1.48789793287868	-0.0206290640359749	1.426866	1.3857582	1.41850353193614	1.39112672578561	0
2001-04-02	0.112677142857143	19.3537803181919	648755800	0.413711360013856	54.1648881321994	0.104883104295277	0.634785071157166	0.225047055085237	45909786.8495114	102.868328362597	3.75036079776803e-12	-2783732.7861	0.0565175576923089	55.5353986412905	184.229090738797	109.663496243882	0.121819	0.0225321935113837	0.5	3.0109710133526	0.0922463660610234	97.3427700943133	0.113921039766981	0.0854068158946682	0.529622015504727	125989220	3.59837021491246	-0.262691478645987	0.00792007284105831	0.0430318809243703	42.081598737428	0.586288639986144	0.673161239250877	0.700210665413151	0.619062386926331	3.45839965134909	1219678106.11829	0.0660257129507464	-2.60879754845712	-0.0219883575879719	1.424433	1.3923374	1.40647868795743	1.38954532109732	0
2001-04-03	0.108889785714286	18.3911898262083	556584000	0.720257137955838	47.56803035789	0.063736298169902	0.356406034014603	0.224936624017766	9497053.03460789	96.726412494073	-7.90988586530807e-11	-5293452.9704	0.0579767179487192	50.3026536458972	180.778280227351	100.571462716403	0.0393790000000001	-0.00368311320315094	0.5	-137.934996220714	0.0308565396636471	98.1562134375397	0.109418421323367	0.0902091369804081	0.503709822801213	121450280	0.979997498376706	-0.259191740916314	0.00025882851646892	0.0454542570118993	-45.1681324814405	0.279742862044162	0.542021780181972	0.647481037002758	0.331103266540401	2.69887947220027	1143472834.60562	0.0576483594395873	-7.62910909662835	-0.064569529841302	1.3907528	1.3958751	1.36964812530495	1.37253471726144	0
2001-04-04	0.107933142857143	17.7559148349577	385212800	0.842566034630711	44.3774886725602	0.0560336827685419	0.225880111701204	0.232991791376123	-6262899.27743781	93.5812857215022	-5.30693937925392e-11	-8043798.15259999	0.0519994551282064	42.9165356840917	173.76993314471	90.1733987159395	-0.068033	-0.0260312811772004	0.4	-181.942173479565	-0.0530546311171161	99.0987771633837	0.107158465836954	0.0935990027517173	0.439515895846321	124774580	3.90965728580446	0.258537695385293	0.000268524867143738	0.0454457808074137	-110.134028591815	0.157433965369289	0.413825841911078	0.569595971972198	0.102285581788838	1.79175530385034	1143471235.14322	0.046284368722592	-8.66510744214356	-0.0372464397871821	1.3565602	1.3918732	1.32930008353663	1.35000185957755	1
2001-04-05	0.115181142857143	17.3881925177986	496903400	0.58476942246882	50.9383659849375	0.0396022502249474	0.504410056504627	0.233166098821649	-22371433.6695566	100.142124411298	1.83646461689704e-10	838820.621799997	0.0518567756410269	48.6316694394368	163.816232388963	90.7391261835308	0.0757159999999999	-0.0387455480101944	0.4	5.04578791323926	0.0583283265285671	99.2709729539882	0.109357430003342	0.0967506882020424	0.379557261699914	127798370	2.42381266721303	-0.0513778995400536	0.00551357597505474	0.0491077300259912	-14.6821624877528	0.41523057753118	0.414294087117779	0.517828677020725	0.207224907311886	1.57759867239151	1109517222.6911	0.157387603649062	-1.24608224504926	0.0678979300960278	1.3353018	1.3870388	1.33164205569109	1.34751533965436	0
2001-04-06	0.115257642857143	16.9882737733024	415681000	0.637459003867449	49.6493534326502	0.0541345511702241	0.444797673004492	0.232431477384095	-22082079.404175	98.7180292110638	-5.37787876743361e-11	4170743.2018	0.049806557692309	44.3815779087829	163.421413465395	94.5362592984051	0.029774	-0.0419787737078148	0.3	33.3902210884354	0.0228423982937422	99.5256304966492	0.107545396926162	0.0989096299468663	0.319682782064268	128120300	-0.759212672712281	-0.0914700173340997	0.00114305443823964	0.0477619657677016	-63.5101315539443	0.362540996132551	0.39704305678937	0.477566803610273	0.235995563147562	1.28544207586119	1126615940.34105	0.0731385167906684	-1.05722318686424	-0.0135074526393772	1.3163486	1.3716073	1.32722703712739	1.34222109608084	0
2001-04-09	0.115410714285714	16.8220290484449	349035400	0.646866073422751	49.4089547443005	0.0647687544158585	0.410156959204703	0.215414149984609	-24734881.1699321	98.0283291701726	2.30453331727822e-11	-834784.487599994	0.0408401346153862	49.1299489404417	160.255192954386	89.8119897185719	-0.069474	-0.0466385806453585	0.3	6.07978509274455	-0.0514761401485377	99.7441977072332	0.100085366393381	0.0991447772361692	0.261703325605223	126564830	-4.39785908381773	-0.627336248424559	0.00400913745284077	0.0461136264118104	-56.9559562743888	0.353133926577249	0.382406680051996	0.445846762424181	0.255526515307626	1.02268831488002	1109954722.57426	-0.0949611530678938	-0.0729776436161005	-0.00243090073242136	1.302902	1.3636675	1.32321669141826	1.33730744224796	1
2001-04-10	0.117985571428571	17.4086400343152	463379000	0.364604027319	56.2535003160382	0.0350514727428722	0.726749136468406	0.200045874969306	-12974823.3892803	104.568993000234	7.57896915087509e-11	5384513.5918	0.0316172564102577	54.5620723223536	155.528479684621	99.4136240135196	-0.061469	-0.024435100726028	0.3	3.47385763836525	-0.04263472268811	99.296952678158	0.0950462612861973	0.0983250740461748	0.234082266414082	126740390	-3.95068304179221	0.208289439182835	0.00763820011911325	0.0495298492899001	22.7443330841714	0.635395972681	0.466736444261664	0.452809989703342	0.494589353378308	1.37607331640346	1145686941.24528	0.00721545693335712	6.83474491319626	0.0704851723750918	1.3259532	1.358353	1.35255879427884	1.35075027093015	0
2001-04-11	0.118789142857143	18.1359274001746	379855000	0.409767365315215	54.9719653448783	-0.0225603422245351	0.646155395413078	0.193496652069049	-16700176.4985578	103.097039878751	4.46364939658065e-11	4849381.4586	0.0309851987179501	52.2116703997418	151.089793772131	96.759849107664	0.00128100000000009	-0.000425259593535846	0.3	17.1966988917709	0.00091812529720664	99.0802566418399	0.0904440104180284	0.0967488613205455	0.221360973500939	124944400	-5.76616298810973	-0.772397909108587	0.00153646504960757	0.0457741912830355	37.2969729440987	0.590232634684785	0.507901841069371	0.471173940158685	0.581357642890743	1.5435169288943	1112666077.93265	0.0958663102024251	4.35615049315064	-0.0109494175438957	1.3554074	1.3559838	1.36699752951923	1.35895476712467	1
2001-04-12	0.119171357142857	18.6154787184894	454588400	0.293100306809767	57.6556023331639	0.0420802323228299	0.774767089985877	0.192586947140681	-8779606.61298406	105.348457377775	-1.52198664318767e-11	841622.207299996	0.0257026474358986	47.0406022218792	147.474441968717	101.585875090135	-0.0288140000000001	0.0145264485110788	0.3	-11.6557226029921	-0.019872638515076	98.6931011741894	0.0914043942320262	0.0956799679028417	0.228452363986187	122064600	-7.86945477273666	-1.15084492680124	-0.000973760322738762	0.042988702425161	53.4011715475284	0.706899693190233	0.574234458442992	0.505527446253454	0.711648482822068	1.88754543031371	1139442580.9213	0.0645667037845243	4.88070115582	0.0280433104490922	1.375257	1.3552794	1.38985635301282	1.37288553673836	0
2001-04-16	0.113661142857143	18.8649383303504	383282200	0.432519733545271	52.3450994054359	0.0334121441540918	0.512578273043165	0.177618357407954	-9872950.96876597	100.315830775092	-3.89517321074464e-11	-753811.401699997	0.0202620512820524	50.7905446261852	145.409696407384	99.3052084410845	-0.046743	0.0251755519490642	0.3	-26.8745114698389	-0.0334819634190019	98.8179461729649	0.0902345946757166	0.0945908932574167	0.228961707280217	119750960	-9.81570136321219	-0.945845912370398	-0.000307124765533454	0.042183962177271	6.57699337445847	0.567480266454729	0.571983061113571	0.527679317873493	0.660590547593727	1.76683922168144	1121848100.19039	0.0730503374692082	-0.147470472265539	-0.0446948371166854	1.3861424	1.3512455	1.38417890200855	1.37287434824048	0
2001-04-17	0.116595714285714	17.9948938126904	211982400	0.645073875116103	47.3596723986593	-6.23672970986793e-05	0.232565117079992	0.175208648018917	-9734016.80820727	95.4860100269627	-5.35774414214144e-11	-7940915.81570001	0.00852708333333463	40.6553721340567	145.255737927235	100.790440027562	-0.136387	0.0294172121575668	0.3	-1.66390383174605	-0.0993136273101723	99.3450270837198	0.0920360873929689	0.0940799320845271	0.206466186171106	123865840	-3.58026957288034	0.231088347011955	-0.00734670658785874	0.0413497529406735	-84.0290327514728	0.354926124883897	0.499630749037013	0.518329794928	0.462232657255039	1.26256188453127	1120784551.86691	0.104903974063506	-4.85079233885679	-0.0497240409455735	1.3843494	1.3436257	1.3581962680057	1.36075737583312	1
2001-04-18	0.127488571428571	18.7626826960536	487193000	0.258555570521023	57.4006533369648	0.0620980046984163	0.840289365523809	0.17242333704788	2920500.24751365	105.903970010908	1.07199606076219e-10	15354743.2948	0.00211173076923199	54.7881270183407	143.192406509807	116.871802428953	0.046103	0.0243913357255695	0.4	8.03947765548603	0.0321031151333804	98.796471757703	0.100853311439663	0.0954346079555544	0.212488443786962	131386290	7.5398825549744	0.632796397247244	0.0032079370088558	0.0523509657528047	104.399861163676	0.741444429478977	0.580235309184334	0.538964966346778	0.662775994859447	1.74786312185062	1159313984.49433	0.307136048442058	4.46942392285993	0.110787678407578	1.393954	1.3599536	1.39188617867046	1.37866803477255	1
2001-04-19	0.131093357142857	20.0717453488708	955610600	0.00472040988048091	65.9703419736257	0.205947214581483	1.37053443373679	0.20856139782065	143856831.503578	117.985681606675	4.19543333213782e-11	64998340.0535	0.00898475000000132	63.317366828363	147.472786127515	123.239089862803	0.264447	0.030726220233269	0.5	2.63286785090872	0.175038063101154	97.3214944893443	0.119114056713536	0.100170497707151	0.28537477028856	150164980	23.4366946246725	1.11718262196756	0.0112312644728457	0.0621854495720437	238.979296667112	0.995279590119519	0.718583402829396	0.598837778507651	0.958074651472886	3.17045351407992	1614658642.59347	0.330917060947556	14.6763601521984	0.120946590379802	1.4441542	1.3997808	1.47688278578031	1.42743311935936	0
2001-04-20	0.1294075	21.2873035264867	782259800	0.100628653747032	62.8121892078022	0.147331350906167	1.07559409467864	0.243149170774444	181362782.333321	113.973578653505	1.54736053972639e-11	40165979.3766	0.0232623910256424	69.8504813277871	150.877313771905	121.612458159416	0.307348	0.0346650051728817	0.4	2.81814139839738	0.212813267934483	96.5861565167162	0.136314898504802	0.107399377866681	0.3806243182779	149791250	20.789542176022	0.549273482788767	0.0108012072373828	0.0624414539942665	190.434893060471	0.899371346252968	0.778846050637253	0.658840535884185	1.01885708014339	3.96860546923077	1589411550.36963	0.0760254908497462	9.01965592888392	-0.0267943250079726	1.4777064	1.4264817	1.51903352385354	1.45941527947584	0
2001-04-23	0.128080928571429	21.9363795500848	646878400	0.212050591868472	59.2627044309083	0.10623480949266	0.885491946198633	0.259377192798625	161325680.153037	110.064687018124	-2.00935997559488e-11	-7197999.9602	0.0373717820512833	67.7212354587413	153.853640672612	118.062326831894	0.304147	0.0421318923706928	0.4	3.12836481405486	0.218002069247351	96.3994360275154	0.148609367850586	0.115641375863462	0.467599316999867	144749220	16.8337553185551	0.462768308594899	0.0101011455411548	0.0628878006255287	120.972981111332	0.787949408131528	0.781880503135345	0.699853858301238	0.945933792803558	4.25217558015891	1521720850.36963	0.0494030064165492	4.19652302695264	-0.0320576384743148	1.5136918	1.4499171	1.53027268256903	1.47638541048023	0
2001-04-24	0.127671785714286	22.1162654763278	552594000	0.243080183089346	58.2750744750834	0.137169362446741	0.815820107242646	0.27070605376803	134115145.888466	108.512074727901	-2.32985908220235e-11	-4088158.54019999	0.043384974358976	67.1934325654777	156.078173512571	109.028990754959	0.202338	0.0563490047035647	0.4	2.23254589851866	0.140990450109512	96.4046995369147	0.154256878015926	0.123364476293955	0.537956320450039	140282800	11.5612269136337	0.0226615195282278	0.0139194873236769	0.0596797459591188	86.9633112790298	0.756919816910654	0.773560274393781	0.724422663665419	0.871835495850505	4.34119257150529	1506514375.85766	0.0368822336582839	1.3710257344718	-0.00911368904181059	1.5601784	1.4722639	1.53306978837935	1.48770879039292	1
2001-04-25	0.126600357142857	22.3049807168382	635289200	0.165463542461074	60.4985266496765	0.129415704481587	0.896704145474039	0.282884196250753	129375365.558107	111.163545770489	1.0774782695972e-12	1162686.14420001	0.05518353846154	73.4711099745931	163.439718477803	113.394465836841	0.264448	0.0602375224794188	0.4	1.76705854328799	0.18280725606921	96.2371954395211	0.167178272014701	0.132127235438104	0.603148875949833	137619790	6.50207125383822	-0.728670404807986	0.0185820012369868	0.057957512314604	81.6723491115998	0.834536457538926	0.793885668775496	0.747576998702111	0.886503008922265	4.59373649009793	1571260257.94962	-0.0439792022954723	1.20775976564561	0.0283093533203203	1.5848942	1.4894241	1.54966152558623	1.50500628304875	0
2001-04-26	0.119263071428571	23.1383414083148	435365000	0.232839595793329	60.3479452891041	0.0389854502904909	0.839133672488544	0.303753325254036	58586703.7486579	110.403082105014	4.26929395190777e-11	1634751.1215	0.0650077692307707	74.9217939356011	164.924145691759	110.124869912662	0.265728	0.0405768567843383	0.4	2.0446822048877	0.184023782278032	96.1937272793546	0.17680309724434	0.141062407799351	0.657737694289828	140307720	8.47866605256001	0.582205746159261	0.0134770227056119	0.0561760690329511	99.8835956601545	0.767160404206671	0.784977247252555	0.760043748218926	0.834844245319812	4.72038849380765	1374150753.52584	-0.0694412837401134	-0.208839295999794	-0.00121437452359879	1.5717038	1.507929	1.56008235039082	1.51880950431261	1
2001-04-27	0.121303928571429	23.8252686291001	548618000	0.0147786762187007	65.0615719697957	0.072581001302091	0.994833146370037	0.327688682587957	53473212.222187	116.201701863063	-1.83134221610001e-12	5283019.2114	0.0722440256410271	78.8597334904308	170.779103083557	122.201462095651	0.266368	0.0343046177293126	0.4	1.67181905344868	0.172899881242532	95.7321116173325	0.185736782071698	0.149997282653821	0.724999089193901	138307050	5.45327937762979	0.332433182884859	0.0188038208502551	0.0569600201141334	102.395086237227	0.985221323781299	0.851725272762136	0.790604256399996	0.973967305486416	5.2661548446858	1474167566.54402	-0.0914867769629437	5.55294443343368	0.0593612713395915	1.586559	1.5321327	1.59925856692722	1.5476825035285	0
2001-04-30	0.126252857142857	24.908845863324	424923800	0.233095757672826	61.3675986694844	0.0499831685823948	0.848089159789833	0.348031584120539	29887695.513155	112.201766555906	5.09085789632818e-11	2663353.54530001	0.0824151025641038	79.6002087098891	171.153934991986	124.951023211055	0.236274	0.0276911701952263	0.4	1.88791355332418	0.156376092610202	95.7086395797382	0.183713721912336	0.156740570505524	0.780038059541277	139487390	3.52206565449059	0.618423362726411	0.0170415850232123	0.0580388449674031	96.9574133481392	0.766904242327174	0.823451595950482	0.801553369583492	0.867248048684464	5.38112000340778	1418641636.22805	0.0033900625982739	2.38318175203117	-0.0274732061762256	1.6024386	1.5580652	1.61022204461814	1.5630400483415	1
2001-05-01	0.122657642857143	25.9150247236748	531736800	0.176690224028509	62.7780339554405	0.0754482868814167	0.859944477902539	0.36302568799272	21298375.837621	113.058659458014	-1.18339145281942e-11	-1307018.12919999	0.0939283782051299	79.7050036430882	174.192465161153	113.777954122141	0.224749	0.0204675472334633	0.5	2.12052647830786	0.145447392520889	95.627945200224	0.190022589457541	0.163396974295927	0.827996180351809	140566650	0.997643887769853	-0.0681283084198725	0.0130582454197068	0.0557701022817738	87.4545305730887	0.823309775971491	0.823404322624152	0.808837020597045	0.852538926678365	5.54606492554224	1431788364.82148	-0.0318658681029877	2.99221009300993	0.0171146103597788	1.6267704	1.5934744	1.62692236307876	1.58072785773396	1
2001-05-02	0.118678071428571	26.9166034779699	623868000	0.0920839256041162	64.8509455141529	0.127658206902957	0.894776104383002	0.367894764632869	35391455.743268	114.353283779077	1.62225519693654e-11	3451406.987	0.109562564102566	79.9287908964913	177.37510592454	103.382586181352	0.329759	0.01993793004014	0.5	1.86811195170315	0.215276577572508	95.4408045179121	0.193728159499269	0.169463211336596	0.875749839429352	140564620	-1.92960758387039	0.0980796324014648	0.0156541432488685	0.0554143397828565	98.8414391301783	0.907916074395884	0.851574906548063	0.823082982580718	0.908558754482752	5.81602623688706	1502357381.46953	-0.222199234144135	3.85366242952859	0.0251343479349341	1.650718	1.6178061	1.65214257538584	1.60288333814596	0
2001-05-03	0.117765642857143	26.8661775870317	548482200	0.301037057798955	56.4844892550702	0.112809994055464	0.680913550275247	0.340758388627424	22622590.6254606	106.097658043696	-5.87574802946972e-11	-1987275.71699999	0.128747282051284	76.4281173639243	176.10570438248	99.6805408726186	0.291982	0.0249284265916595	0.4	3.19711652639322	0.201740238905411	95.8980674803197	0.192567993383941	0.174084167746065	0.889568873866731	135765350	-5.37896553175389	0.00869181433511201	0.00924405739976109	0.0589021975542935	48.3791085096805	0.698962942201045	0.800704251765723	0.815623405642386	0.770865944012398	5.42617950102851	1449785001.67198	-0.236573299817675	-2.66474065711625	-0.0632603796126711	1.6541758	1.6129398	1.63416605025723	1.60203418575579	1
2001-05-04	0.119551357142857	25.9664848566032	618745400	0.199765761076298	59.2297924973876	0.150753074677123	0.760926451274427	0.329908705253857	33954359.6578989	108.332095639517	-9.15147260585914e-11	-2156911.11859999	0.135724993589745	76.1041088690934	178.782517009303	106.18553779711	0.189531	0.0187616816902074	0.5	2.10695065618083	0.122112361509132	96.0569301883196	0.193614993892868	0.177990332975425	0.891587172686314	133693980	-8.5749759228124	-0.0147350892428229	0.0146269922701265	0.057106690341484	28.2558821332237	0.800234238923702	0.800547580818383	0.810598130701052	0.780446481053046	5.31189899980442	1512612793.70754	-0.122770046245341	-0.271117726022485	0.0311598010112992	1.648413	1.617486	1.63904303350482	1.61053651561837	0
2001-05-07	0.115406928571429	25.1310558926338	549607800	0.365447011216293	55.4616793367206	0.125815230248866	0.638338186967102	0.306516339092185	21390969.6279669	104.052042785993	3.23724446032261e-11	28468.6752000037	0.125685320512822	82.0646104186552	180.369208617679	103.87017568488	-0.0486629999999999	0.0119354849320714	0.5	1.99525468405401	-0.0299940298819688	96.4938321503098	0.192956148208802	0.180983496022101	0.870124180461951	133089740	-11.2825879380522	-0.907316516074264	0.0159004709258799	0.055773711734652	20.0225888952453	0.634552988783707	0.745216050140158	0.788804103847421	0.658039942725631	4.90580204020801	1461510265.97829	-0.117982802254658	-2.55074094451394	-0.0311598010112992	1.6416258	1.6220322	1.62543302233655	1.60829587641503	0
2001-05-08	0.105547285714286	23.5501720010645	470748600	0.692676914324994	53.6471151700542	0.126359718640233	0.563340515253983	0.277845467229857	10328933.2058375	101.572955913183	-5.43104762729014e-11	-2733303.58	0.117020596153848	76.3315128787795	177.035610742794	99.3931812653797	-0.030095	-0.000788445232301403	0.5	3.62572797522061	-0.0189486478142247	97.0045997183232	0.192791136808125	0.183345024179305	0.826628519728323	133700420	-12.7483788432684	-1.24987263892123	0.0064159522266562	0.0479748916131684	-67.5450624466207	0.307323085675006	0.599251728651774	0.725619978782205	0.346515228390912	4.40655211922456	1447841671.63988	-0.0704632166699859	-3.49571721504421	-0.0157489429402286	1.6242092	1.6254898	1.60803534822436	1.60192208070321	0
2001-05-09	0.0964832857142857	21.8862384032492	389526200	0.859764559699204	50.9324556743477	0.105327369670413	0.456292690712734	0.262242169193654	-1722856.66050029	98.7380230640989	-2.92351480502916e-11	-2518844.7032	0.109694006410258	65.007712359245	179.293746821671	97.1244031971176	-0.017288	-0.0188374898132068	0.4	-2.58237109640776	-0.0111962322528692	97.6312034084276	0.196382280130577	0.18595247536956	0.760594467385323	132044360	-13.6785287191168	-1.75216913454646	-0.00448239520821454	0.0331237898541528	-123.323823974319	0.140235440300796	0.446246299201448	0.632495418921953	0.0737480597604381	3.77550667964186	1423844643.61754	-0.108976163921234	-4.59514924078668	-0.0243052229129593	1.5907852	1.6207516	1.58384456548291	1.58983861148444	0
2001-05-10	0.0990365	20.8416770383197	317282000	0.987220733116946	46.7047217454312	0.0926354004520781	0.280672720714013	0.249659294923305	-26219061.061095	94.4694298915468	-3.10338249575744e-11	-3800867.19949999	0.0974008910256425	57.4896160500073	173.722401171681	87.7862627271757	-0.065952	-0.0282594519331796	0.4	-2.17111164537443	-0.0438089084181091	98.4742183028173	0.19851502781284	0.188464985858216	0.667513900853134	131480370	-15.0460445975524	-0.875265240107677	-0.00551305674901471	0.0340704753478802	-142.094169846037	0.0127792668830541	0.30175728842865	0.522249375424185	-0.13922688556242	2.91944896331813	1356260812.4634	-0.0742488014284977	-6.26274181739022	-0.0417263652070505	1.565685	1.6099304	1.54680037698861	1.56854286394182	0
2001-05-11	0.097659	20.0192648483372	266520800	0.977975334018499	46.0742971451997	0.0685338807032125	0.239877675949572	0.240748351303152	-44067061.6708002	93.770495774756	-4.2884960077776e-11	-2510478.5601	0.0791726089743605	61.2350556592853	174.281788745851	89.6429798995067	-0.119738	-0.039209131286117	0.3	-3.28820752347948	-0.0786616040017485	99.1916338703331	0.192997025673391	0.189371393821251	0.55993666119778	130281760	-17.8752751181026	-0.980963697059934	-0.00372539543914347	0.0332458900035988	-154.352271090801	0.0220246659815006	0.208513080946267	0.417670610598212	-0.209801978357624	2.16366068274076	1318016872.87419	-0.158586533550004	-5.51997237915124	-0.00654334226331915	1.528547	1.58848	1.51890258465907	1.54937270686149	1
2001-05-14	0.0960774285714286	19.1035430677133	343826000	0.869634431570835	48.2796088759366	0.079887059476783	0.283349985351813	0.220641507522361	-43914660.2033165	95.214736131851	2.72830385278087e-12	845217.689400007	0.0657425512820529	67.6915548928991	175.707355995895	89.818728042676	-0.0896429999999999	-0.0446087828994469	0.4	-7.75914185592383	-0.0583740040871432	99.5904499346786	0.191449869852361	0.189787089027473	0.45568951260484	130581710	-17.8237582658054	-0.198554522768077	-0.00170192639783443	0.0337536389906406	-122.967021113391	0.130365568429165	0.182463910107233	0.339268377101219	-0.13114502388074	1.69044963035878	1330483876.85739	-0.265620739016379	-2.03995701343198	0.0190732253910065	1.5071606	1.5743932	1.50969538977271	1.53881057834122	0
2001-05-15	0.102046857142857	18.8328949316435	284569600	0.89343896602539	47.7538621985916	0.0628853044537132	0.131050474434271	0.160448529320997	-55668697.0329351	94.2295825762396	2.25872433441789e-10	880326.939800006	0.0432496346153866	67.0895225133219	167.480286338523	87.1756619207404	-0.193373	-0.0452707813731024	0.3	-2.77493877458891	-0.122469248325641	99.9360913626832	0.189726187556025	0.189774908733183	0.356892519841279	124979540	-19.256850036889	-0.333287768173264	-0.00409025900959315	0.0325991421204635	-60.5644248249758	0.10656103397461	0.157162951396359	0.278566568532932	-0.0856442828767888	1.26312327523701	1277972080.33461	-0.0918483663754291	-1.27064832632135	-0.00473397289890659	1.4893602	1.5567847	1.50120959318181	1.52888829137009	1
2001-05-16	0.103220285714286	18.3012524568591	365152200	0.694336663647302	52.4207920666186	0.0694895739849033	0.334329648072969	0.14568357256073	-43240839.0197716	97.7093009219042	-7.21145147835882e-11	2164808.4878	0.0270654102564118	56.8021932421113	164.737185274024	96.5544642672785	-0.0890030000000002	-0.0334994347026566	0.3	-10.9722442220462	-0.0560743616208315	99.8616718378219	0.185278250051716	0.18887557699689	0.280593796730377	115248140	-18.3310095231942	-0.908655549395739	-0.0011686382929084	0.0346454613463334	-65.224216717318	0.305663336352698	0.206663079715138	0.254598738927001	0.110791761291413	1.22048394449132	1319484867.51738	0.00735142511846076	2.99144144008858	0.0389216805285843	1.4908968	1.540841	1.51518839545454	1.53148060203007	0
2001-05-17	0.100873357142857	17.8075844445593	282122400	0.813366095691321	49.5700420661511	-0.172994059247092	0.205540717386334	0.149616285960304	-44619688.88516	95.9012862189087	1.14121371965244e-11	911449.667100009	0.0106472179487196	48.2189755701342	158.646934382753	91.4563163324533	-0.152394	-0.022612651693305	0.3	-1.30321514009093	-0.0962749755045554	100.008014002251	0.179645615432353	0.187029584683982	0.213216045723574	95978750	-17.1870784510452	-0.31042467457539	-0.00716721674257641	0.0299800124052915	-59.575283373012	0.186633904308679	0.199986687912985	0.236394721922329	0.127170619894297	0.9896856421856	1282583571.31423	-0.0484306747409131	0.950201692334432	-0.0230860035239451	1.4979402	1.5318126	1.51276859696969	1.52719849257006	0
2001-05-18	0.0920467857142857	17.2108158938579	242359600	0.790718969464168	49.4646683947097	-0.158952996009051	0.231637245099338	0.155033804148392	-35376659.0907853	96.1153285955332	-2.7217022568833e-11	-1487498.30669999	-0.00994119871794719	39.9338054780453	156.949167947145	94.2707886871149	-0.195935	-0.00726732262152179	0.2	-1.80171600245885	-0.122259193969984	100.124059342126	0.171293952706787	0.183882458288543	0.154438935373258	89299350	-20.253531892898	-1.13488058882378	-0.0052922352731689	0.0294537767789518	-72.1443689954747	0.209281030535832	0.203084802120601	0.225291415321753	0.158671575718296	0.790798894061817	1305523565.88641	-0.198707930919366	0.483962994321363	-0.000849870530494623	1.5066484	1.5175977	1.5107283979798	1.5234620393755	1
2001-05-21	0.0898018571428571	16.8998917873238	357609000	0.783265432817289	49.6375634117042	-0.110290147426282	0.258687272762358	0.159758455107715	-22512363.9564307	96.3736943470965	3.68889719165552e-12	85228.9753000059	-0.0202190320512807	39.8038038337317	158.693724876266	95.8893112303272	-0.0896440000000001	0.000975229553422441	0.3	-1.28283505227366	-0.0577246107030417	100.197233575403	0.168559417883188	0.180817850207472	0.10449065671494	88292750	-15.2631605158638	0.0760188338245413	-0.00643415588749412	0.0288150713473235	-59.4572221143726	0.216734567182711	0.207634723807971	0.219405851483826	0.184092468456261	0.635938434940408	1326964442.08619	-0.183124628215664	0.106206599540741	0.00127420365427133	1.510106	1.5086333	1.5100085986532	1.5207542140345	0
2001-05-22	0.0887303571428572	16.8177385748917	254380000	0.781115608930931	49.2744653284233	-0.143396440326723	0.251677619733333	0.161897249058791	-35213231.2353954	96.2325692317502	1.05067930717144e-11	-87605.8602999987	-0.0372980576923065	39.8539006242405	159.782098069609	97.9982585057406	-0.14407	0.00820351923565406	0.3	-0.7430531896772	-0.0914344446894867	100.270213873775	0.170862231892174	0.178826726544413	0.0617512631664541	88739980	-12.3474710776076	0.113736173214836	-0.00843413182678372	0.0273669345750149	-35.8412360949276	0.218884391069069	0.211384612895004	0.216732105287552	0.200689628109907	0.487163681946767	1252014430.92436	-0.245447089323444	-0.297009792212395	-0.00255003297514583	1.5142038	1.501782	1.5082480657688	1.51784017511914	0
2001-05-23	0.0846427857142857	16.1226687584873	184119600	0.829114796043891	47.5876038683781	-0.187865216815327	0.206902954402412	0.167774946177764	-40463392.8886249	95.4180398874669	-2.79222993321985e-11	-805633.806600001	-0.0534987628205121	40.2908766994414	165.698577635129	100.999991851767	-0.110774	0.00404693777184526	0.3	-1.38514894714907	-0.0718302808826443	100.419419887764	0.159886137131237	0.175038608661778	0.0217410508948745	88118240	-12.9440525245887	-0.0704105884040835	-0.0048761426154279	0.0228263311920938	-75.4371488631281	0.170885203956109	0.197884809915372	0.210449673496825	0.172755082752466	0.274059620807798	1240173212.68992	-0.214834776347239	-1.47733753360669	-0.0115556372044568	1.5030624	1.4969796	1.50131171051253	1.51231268873384	0
2001-05-24	0.0784693571428572	15.2022944610624	116180400	0.80390124298278	47.3935519626123	-0.0527610947091318	0.233435306912589	0.173047393260028	-26278849.7313542	95.5873782133124	-1.74586724600818e-11	-672552.529599992	-0.0618185769230764	40.6161436439271	175.290676889791	101.531808678381	-0.0877209999999999	0.000213602153077925	0.3	-0.580663891752242	-0.0573729809908103	100.534591400159	0.135175126582681	0.167065912245958	-0.0146222285548281	81518990	-13.5428259012169	-0.0336350033512289	-0.00722908252404411	0.0203331853937529	-107.096509001921	0.19609875701722	0.197289458949321	0.206062935314324	0.179742506219316	0.0934719867581091	1288130130.48618	-0.28558113862521	-0.974543350497275	-0.00129164304839463	1.4985804	1.4982603	1.49604747367502	1.50744110896405	0
2001-05-25	0.0778060714285714	14.2590521731688	76494600	0.912060384792049	44.524396498157	-0.128211498043989	0.161418620066786	0.173475700715463	-21753171.9065804	94.4437789293188	-1.97355386561464e-12	-624275.496599996	-0.0610387564102557	34.7844861044045	182.773902173268	97.7243725360948	-0.0781180000000001	-0.00602148235013699	0.3	-0.680097502827277	-0.0522156771192582	100.776095005977	0.113547039922475	0.156362137781262	-0.0531364408374757	77840630	-16.7626477945446	-0.555105280622996	-0.00639239855340917	0.0195186975167834	-126.98415173222	0.087939615207951	0.160839511035531	0.190988460554726	0.100541611997141	-0.198725285301526	1274566290.92426	-0.246899398755077	-2.303590057347	-0.0191479190414071	1.4887198	1.4976841	1.48314664911668	1.49833272551604	0
2001-05-29	0.0794202857142857	14.6495963205866	-52502800	0.85375523499302	37.3796576075669	-0.110311266980714	-0.059926255474229	0.186091983984333	-26223304.370697	89.8401747444317	-7.39533199273783e-11	-5886646.48459999	-0.0604107499999993	33.608596122515	191.808336141102	92.6229486106676	-0.0979669999999999	-0.01646801714143	0.2	-0.472176980821774	-0.0688373396415653	101.437888049092	0.0911198830053612	0.143313686826082	-0.110012294883777	78105790	-10.3197625198417	0.492128265281753	-0.00932474390721209	0.0236574669303033	-270.579973270918	0.14624476500698	0.155974595692681	0.179317172267378	0.109289442543287	-0.868730268329343	1246322663.15946	-0.0971510711242599	-6.46236980548726	-0.0583480277293576	1.461955	1.4860305	1.44701276607779	1.47586222996767	0
2001-05-30	0.085109	15.9548584652426	-246772400	0.917918540986864	30.4792250686658	-0.152764238825865	-0.230218587851953	0.225162900424677	-44984434.8851032	83.8472891131763	-5.55980210285089e-11	-15838840.7324	-0.0657835769230759	31.1999074578863	196.646911806134	82.0746708347752	-0.196575	-0.0353131124868837	0.2	-0.343732500164137	-0.144279800129673	102.595906812527	0.0631774304664874	0.127286435554163	-0.199911261906005	82478620	0.0604685516797502	0.872055813864851	-0.0132320819175523	0.0299503726245961	-303.47825827801	0.0820814590131361	0.131343550132833	0.163325964889196	0.0673787206201056	-1.98223661426472	1179792692.74733	-0.193886660930925	-11.3931905655896	-0.0819858027514269	1.414316	1.4642599	1.38685251071853	1.43780218815537	1
2001-05-31	0.0810273571428572	17.1668875995661	-136049200	0.891857210915786	31.8423300556792	-0.178319914998567	-0.0955663270372339	0.244511311074743	-41840477.5260587	85.7751182538785	-6.31032852645158e-12	-9908581.73480001	-0.0735575705128193	30.6276796506579	203.680580751047	84.7134049414793	-0.213863	-0.0476388091977344	0.2	-0.539083834338943	-0.154794628974847	103.383076332189	0.0348232435075269	0.108793797144836	-0.301160156686597	83408220	0.905363667825926	0.426981346232239	-0.00969901565212762	0.0293510066583379	-196.107086780401	0.108142789084214	0.123609963116627	0.150087297631673	0.0706552940865339	-2.79374762185184	1204890447.4579	-0.265621662539076	-8.19846884620165	0.00855839654583296	1.3723118	1.4376871	1.35037434047902	1.40864142667257	1
2001-06-01	0.0829661428571429	17.3708178946356	-22030400	0.747763384381875	38.9677073841997	-0.100752604708844	0.120980724674625	0.253855526566295	-16144508.6446397	90.60943092515	2.84433347921572e-11	4034005.1542	-0.0763445897435888	37.6054898603191	210.917163136776	88.7803255969543	-0.146631	-0.0580351484074151	0.3	-1.38595670995671	-0.10401931265641	103.529845249145	0.0134278401607939	0.0897206057480272	-0.387879888846721	85339870	1.80076979383661	0.809231063849971	-0.00586760974469339	0.0330637974176615	-110.846678545524	0.252236615618125	0.166485513950459	0.155553369737935	0.188349802375508	-3.07364318324364	1277820717.9117	-0.224449426896332	-2.11636159092276	0.0460413434195297	1.3427294	1.4206549	1.34611856031934	1.39572607636847	0
2001-06-04	0.0815375	17.5083263856677	-92510600	0.783020155276306	37.9230398051506	-0.153426637674372	0.121591253118851	0.25802602404637	-11261934.2499435	90.6120732943505	1.2884260430589e-11	2912357.82390001	-0.0847753205128194	36.8672815574416	216.754093228301	87.6910502602135	-0.220266	-0.0656933491123967	0.3	-0.832722015643841	-0.154012011701978	103.680476290202	-0.0148920706208053	0.0687980704742607	-0.462836533456223	85350720	-0.947501355714546	-0.0924294043976381	-0.00802948414821305	0.032274773609053	-84.0925589853492	0.216979844723694	0.183316957541538	0.164807899005803	0.220335074613008	-3.34703604732159	1250711313.8538	-0.188258082573688	-1.23494887779257	-0.0110710185169834	1.3158364	1.4022781	1.33837237354623	1.38248133521056	1
2001-06-05	0.072813	17.7527299527645	25438000	0.680202432608382	40.0307182252355	-0.0815436651562824	0.199975280251774	0.254879470836806	9891000.17934465	92.6568982452203	-2.88778990170298e-12	538310.297700003	-0.0857481089743581	39.0918772857095	226.772190784562	89.1063960439336	-0.167121	-0.0584034669443234	0.3	-1.12292587873792	-0.117464768934251	103.610729950561	-0.0361573728807434	0.0478069818032599	-0.520322319297528	87791270	0.677335624144575	0.688375145287566	-0.00672412450912488	0.0327843473822686	-69.2065678637997	0.319797567391618	0.228810494158231	0.186142097389945	0.314147287694802	-3.42614672415821	1318333827.48779	-0.180193399774294	1.57649188950997	0.013461239243782	1.309049	1.385502	1.33918424903082	1.37490436517228	0
2001-06-06	0.0674558571428571	17.9796761222115	-30356200	0.712984728286617	38.9622445621932	-0.0640080679348931	0.195771507716786	0.254981530622872	22443091.6131797	92.5136802927988	-4.01845345035867e-12	682186.843799999	-0.0889660320512811	40.1418284346181	239.785117188036	89.2380796792339	-0.179286	-0.0352330998361353	0.3	-0.441841931345489	-0.126693801790728	103.588796210332	-0.0589884211206864	0.0264479012184706	-0.565244222142314	86638020	-3.08966522617146	-0.367612823981123	-0.0102753626533045	0.0299393630613189	-64.4871572484198	0.287015271713383	0.248212086676615	0.206832093818835	0.330972072392175	-3.52962376678102	1336931026.24179	-0.179935102362594	1.16308358844789	-0.0100789033869718	1.321215	1.3677655	1.33524349935388	1.36626029877732	1
2001-06-07	0.0683232142857143	17.307912042225	50939000	0.512836988670188	45.8550278368471	-0.00624470571243947	0.380873572531246	0.252134986337496	47310494.9383237	97.1671097441921	2.73535519071237e-11	2045419.52580001	-0.0885883525641016	46.607826095225	256.037080194246	93.3620505695316	-0.121658	-0.0108695943515122	0.4	-1.35539281918247	-0.0840825473666179	103.107602220015	-0.0787333118037106	0.0054116586140344	-0.583403817333261	86641660	-3.98524014407501	-0.0211126052827275	-0.00544077493285873	0.0330597604922208	-30.3030786599784	0.487163011329812	0.327862394894347	0.247175527510673	0.489236129661697	-3.22987847828718	1413023610.2348	-0.090204419625068	4.10960309451312	0.0438854580783816	1.3431136	1.3577127	1.35246599956925	1.3700149717269	0
2001-06-08	0.0704661428571428	16.6841311108089	-34717200	0.581411171062205	43.9030307771237	0.0471159952354567	0.340131006927904	0.251890066410043	60248118.5941257	96.0035972691501	7.85081192604869e-12	1488113.36730001	-0.0872420256410247	45.1881711452445	272.239703577849	93.6730835869338	-0.139587	0.00218400999777434	0.4	-1.14421175898044	-0.0973544989177264	102.844288364973	-0.0906055955111176	-0.013791792210996	-0.58735994878677	87312260	-4.28487832515572	0.767409807930289	-0.00650134385904495	0.0331392096442774	-24.8652816726348	0.418588828937795	0.358104539575496	0.284151864865614	0.506009888995262	-3.08369381797423	1438536892.98654	-0.0309477408179644	1.36290037952118	-0.0158219845262543	1.3486202	1.3456748	1.3566906663795	1.3691286132311	0
2001-06-11	0.0723919285714286	16.7539569360576	-108217200	0.839568352121859	37.441268113198	0.0332582474529706	0.145333991789916	0.260655830058661	42616934.156882	90.8143067601095	-4.17844897959185e-11	-3944440.5651	-0.0921469551282037	37.4346941891932	279.807104143641	93.3394920512531	-0.204259	0.00926537141370517	0.4	-0.689691674133777	-0.147714477219682	103.152906934311	-0.111760318933339	-0.0333854975554647	-0.600593519175718	88449200	-5.55564029830712	-0.449813069570663	-0.0108808305817383	0.035963502158464	-65.9240841249518	0.160431647878141	0.292213575676378	0.286839101802535	0.302962523424063	-3.41049732965474	1376850180.48654	0.036867694863459	-4.07662029276076	-0.0619156155064125	1.3406802	1.3282583	1.33218711091967	1.35350159264363	1
2001-06-12	0.0734123571428571	17.0296093576089	-32268600	0.766628126539324	39.4652826502114	0.0340844006397978	0.223458025569384	0.267422057340836	35369040.562072	92.6635773796012	-1.95509210703027e-11	-2355492.32729999	-0.0941705576923062	29.6262304666769	290.835236759293	102.679521717572	-0.18505	0.00884105535863291	0.5	-0.853715162309919	-0.133039237508335	103.214768091814	-0.126066755938467	-0.0519217492320651	-0.61254517204995	88381370	-6.3106835866707	-0.30689302563195	-0.00973652041869475	0.0364999504832673	-70.9709868879366	0.233371873460676	0.272599674937811	0.28209262618096	0.253613772451511	-3.53295829780562	1390732397.34088	-0.100954587549469	-2.51198482733978	0.0133835966629523	1.3326124	1.3208307	1.32161440727978	1.34385930307206	1
2001-06-13	0.0773919285714285	15.9635135875038	95603200	0.701592661890202	40.6898467100762	0.0259640664480838	0.268612460001464	0.258394247765936	10081846.6472754	93.9745377394042	4.35391968987687e-11	1311560.9682	-0.0953321538461522	38.03940911781	290.928748673141	102.606507814983	-0.146631	0.00303464394484056	0.6	-1.05614634877793	-0.106044260201971	103.136207174089	-0.136563620866277	-0.0688501235589076	-0.618440244497132	91812140	-2.22758426296857	0.598819859559505	-0.00835315939150334	0.0367942392142783	-20.4149578420484	0.298407338109798	0.281202229328473	0.281795827230131	0.280015033525156	-3.53198669001064	1325648410.40863	-0.0445979262255708	-1.37315118959952	0.00784705826495652	1.3292828	1.3252489	1.31798093818652	1.33783288433168	0
2001-06-14	0.0773918571428571	15.2228000348352	21266000	0.845259282921857	37.6642051325623	-0.0241112974214524	0.18983584737353	0.254680716506472	-14448098.7149243	92.1586694428117	-3.37843826711255e-11	-749132.075300001	-0.092266083333332	38.1395796653828	287.780070624044	95.1651718329823	-0.101809	-0.0140168932308431	0.5	-0.869204227403089	-0.0769422160039012	103.286498080866	-0.146253111568871	-0.0843307211609003	-0.627714490620168	91499870	-3.6882138725752	0.0899983118089054	-0.0103197057745286	0.0371220250468292	-91.8223276767174	0.154740717078143	0.239048391911696	0.267546682123986	0.182051811487116	-3.71756474819631	1275361255.9255	-0.0507528668940864	-3.55753944452512	-0.0292459835312874	1.3064878	1.3248007	1.30296595879101	1.32603345081683	1
2001-06-15	0.0805041428571428	15.0354315080924	134922200	0.641840823255022	42.0674585335912	0.0301512320111517	0.316364522568263	0.245780532673071	-4853211.73297954	95.4426684244314	-7.41578550048298e-12	633529.810900011	-0.0800262564102547	44.154947291773	286.301325673114	98.9351263909047	0.0422610000000001	-0.0206149789101198	0.5	-1.52970004041804	0.0328228818184523	103.093378014707	-0.147612026063574	-0.096986982141435	-0.62741829589702	93031190	-1.38840012106291	1.05218466117434	-0.0069529558027984	0.0383932060938073	-72.1208620379179	0.358159176744978	0.278751986856124	0.271281783701365	0.29369239316564	-3.61126921877241	1338683671.1935	0.0072701488947613	0.146992207346996	0.0277792950709266	1.2952184	1.3219193	1.30490830586068	1.32289882339559	0
2001-06-18	0.0755736428571428	14.7144019461649	48444200	0.582908268444675	41.4480595895475	0.0072512367627246	0.314521668093922	0.23469644894446	-5767405.67039204	95.6435478504469	1.93765226705057e-11	1733109.6657	-0.0714231730769215	51.9905934522858	280.706619040837	97.0869058060513	0.0243310000000001	-0.0160701228285812	0.5	-3.36438821512477	0.0188678916952525	102.945753117157	-0.148669408674068	-0.107323467447962	-0.620934137874141	95366950	-1.90902748966839	-0.399902202790777	-0.00328893054251007	0.0356310076467759	-20.5121842309844	0.417091731555325	0.324865235089191	0.289142934163974	0.396309836939625	-3.5303444017756	1319354132.56219	0.0425621798322633	0.419820873170311	-0.00539659357736683	1.2989322	1.3198062	1.30385520390712	1.31905340096003	0
2001-06-19	0.0724869285714285	13.6999138527273	-31827600	0.635706628656245	40.6282379887012	-0.0358330246770174	0.298917962513842	0.216482275620236	-22811383.0470066	95.7439122795474	2.60185925817037e-11	-664353.723599997	-0.0686074935897423	62.7740576651412	266.051550356301	97.3950587707046	-0.0448219999999999	-0.0135721924094994	0.4	5.84621962320358	-0.0340833905935857	102.847937758633	-0.152502223391448	-0.116359218636659	-0.611242795361266	93618070	-2.84366629750673	-0.883828508848513	0.0018417009966691	0.0283653627570228	4.29664741495086	0.364293371343755	0.338007947174046	0.305431271833998	0.403161297854141	-3.4820720794992	1259872069.8357	0.157779398383649	-0.39468652495314	-0.00690993886930852	1.2973954	1.3150039	1.30016513593808	1.3142773280582	1
2001-06-20	0.0782012142857143	13.035540644243	76077400	0.0775306576823855	51.5408011121323	0.0506061562719235	0.676800938746226	0.186171816611817	-1917354.25718331	103.210133724548	5.0157980816461e-12	4753084.4074	-0.0592286282051269	71.309178830827	247.19937801376	100.04614571519	0.0646709999999999	-0.00629207348044863	0.5	2.46246243746514	0.0477291446484845	102.072990388144	-0.148208744669029	-0.122729123843133	-0.573661596408825	93851870	-1.15306758463095	-0.0257821827923905	0.00646374632633272	0.0342185849330878	106.971420322712	0.922469342317615	0.532828412221902	0.381230318629966	0.836024599405774	-2.83732628159269	1347004078.91701	0.396766397075643	5.72450818639538	0.0707415167250867	1.3127628	1.3210228	1.32929375729205	1.3275998138658	1
2001-06-21	0.0822317857142857	13.50330019813	161410200	0.148353886001922	56.3299994663766	0.0773496592945014	0.950958557682492	0.16604134004546	18517035.685065	107.304707438386	1.19287785154126e-10	7353061.947	-0.0492586538461526	70.7944115696827	229.068363150153	105.487788798219	0.099248	0.0147449818999863	0.5	2.5623971756085	0.0714095844056512	101.124850085697	-0.14473807200218	-0.127130913474942	-0.505446265504705	94605490	-1.75947228917736	-0.289804441286741	0.00580105697457813	0.0334519522363562	236.982527699039	0.851646113998078	0.639100979480627	0.467187205580186	0.982928527281509	-1.98950062303003	1386527261.06771	0.425973554523765	7.95197823053095	0.0371416790009487	1.3461868	1.3263373	1.36621450486137	1.34804639316293	0
2001-06-22	0.085242	13.9595469379749	89903800	0.213779575328615	54.6971374009059	0.0446051726602958	0.929985058756628	0.152557056719276	21236265.8954771	106.446041886744	3.13048785633173e-11	1713661.95560001	-0.0365633141025627	70.9477066785171	222.467601560422	111.077869044094	0.0979670000000001	0.0271178990196384	0.5	2.5623971756085	0.0712091503375368	100.515985224197	-0.139958220309705	-0.129696374841895	-0.424463298181132	94783850	-3.44463408703977	0.0144551368752985	0.00585700516713364	0.033422314997191	185.240487778412	0.786220424671386	0.688140794544213	0.540838401901529	0.982745579829583	-1.39255967756446	1372687130.37933	0.406863088249224	4.85162138592143	-0.0102793374550861	1.369494	1.3323562	1.38591933657425	1.36209777622422	1
2001-06-25	0.0893789285714285	15.0922354192822	199791200	0.00233750269711857	63.311898305215	0.105087327759962	1.38092906095843	0.166726750515262	52071669.6306098	114.382449904814	4.79181908025851e-11	5559796.0474	-0.0252142628205112	71.0851973100028	220.449404596173	118.11915547391	0.149192	0.0414556334639214	0.6	1.85579288341168	0.102169717762504	99.3753103630088	-0.126926434132035	-0.129142386699923	-0.310049449335592	98293930	-1.35860523237652	-0.0707927311917693	0.0104402871210306	0.0385630236321108	213.906009699591	0.997662497302881	0.79131469546377	0.624330499755609	1.12528308688009	-0.27029009695041	1481155219.69876	0.402125243580648	9.93663441589875	0.0748460255033486	1.4163648	1.3576485	1.43598055771616	1.39373508963799	0
2001-06-26	0.0911909285714285	16.144017580496	131595800	0.0525758298951881	61.5629657837621	0.157180125741934	1.16609570074049	0.195671743406974	77311598.9570177	112.626008334216	1.07946474835547e-11	5562354.0679	-0.0127897756410242	75.9467859773234	233.623907186181	116.023480332094	0.155596	0.0562806652735554	0.5	1.87332205690009	0.107937440712264	98.6679328269966	-0.116226939198802	-0.126559297199699	-0.18512440167523	95253830	-3.37312372822518	0.200707192561776	0.0104420296207472	0.0385620281372639	162.506209290882	0.947424170104812	0.843351187010784	0.697337395507334	1.13537877001768	0.511308186739368	1545762842.69548	0.300717744591502	6.06628724472711	-0.0100542615764945	1.461955	1.3796752	1.46423237181078	1.41682616424927	0
2001-06-27	0.0924664285714285	16.4191152155537	38063200	0.1517364575622	58.5854633968569	0.209048187089054	0.987582166616529	0.20950093258551	83875039.5086615	109.755256580158	-7.98023052390275e-12	-1751735.0298	0.00536057692307801	68.2371936268599	242.048919399082	117.40440996248	0.211303	0.0574980918081303	0.4	2.73395026026605	0.152438955661602	98.3368217388733	-0.108074405414279	-0.122862318842615	-0.0679698401713669	90216980	-2.68005282638025	0.140223064406996	0.00600445684317318	0.0378646468792149	113.699645496658	0.8482635424378	0.844988638819789	0.746554476611486	1.0418569632364	0.962102738290538	1556986615.02032	0.189771810501477	1.84728798270105	-0.0174141005570737	1.4833414	1.3980521	1.47431591454052	1.43094558893122	1
2001-06-28	0.0926195	16.6745630195358	125165600	0.110518523286877	59.6116075950922	0.209326157900548	0.965877675410901	0.219602110095399	84678181.8651197	109.769182628727	8.76551136363633e-12	-670039.006699995	0.0224970384615397	75.2197361471394	249.045866465415	115.166340284522	0.20682	0.0503081264681441	0.5	2.19680707727293	0.147587704353739	98.0521943235078	-0.0982340665362569	-0.117936668381343	0.0404615348747583	89035940	-2.67989379105656	0.0167428282395328	0.00773776570184822	0.0373466614058267	100.669269221869	0.889481476713123	0.859819584784234	0.784309512669068	1.01083972901456	1.3716821305136	1577641472.16317	0.218326044700677	1.3417531787329	0.00853234535508895	1.496788	1.4214874	1.48530694302701	1.44482620912554	0
2001-06-29	0.0959998571428571	17.9764887362024	-3682000	0.338891638691345	57.3910627088452	0.0989969897672429	0.836769566701907	0.238730333043873	41134700.4229465	107.823591183514	5.68060829072484e-11	-638568.874999995	0.0372816025641038	81.8232893493865	242.748127404162	114.363060774389	0.178006	0.0463648010137627	0.4	1.5507191240605	0.127344663449189	97.9857952262214	-0.0904313691103911	-0.112435608527153	0.131421555589073	89777380	0.973163269653262	0.561344904396449	0.0111462178014	0.0325554798393775	104.882627439175	0.661108361308655	0.793582510292374	0.787400511876837	0.805946507123449	1.57013616624406	1455574525.2955	0.250649890176637	-0.449587970568421	-0.0123959826395934	1.5094662	1.4394801	1.48644462868467	1.45280689837544	1
2001-07-02	0.0968162142857143	18.9877781572359	53830000	0.232153710822795	60.9061447523478	0.127653220321638	0.910653279047232	0.250690235785941	25979405.6972699	110.011504071642	-5.14743990732369e-11	539.177800000762	0.0570080512820523	82.3188120549197	243.980626747784	118.375445259653	0.257404	0.030480663968024	0.5	1.49485765265497	0.184163889568507	97.7375188037907	-0.0778601099480534	-0.105520508811333	0.21622075807648	89128970	-2.3490379898291	-0.278063174010594	0.0121807424224272	0.0328637861394354	84.1542149774092	0.767846289177205	0.785003769920651	0.786601597891442	0.78180811397907	1.93450738887431	1478263314.74282	0.255318368400518	1.14973323003218	0.0275732425880309	1.5083136	1.4623392	1.50107641912312	1.46690382594355	0
2001-07-03	0.0917652142857142	19.9268326196241	25694200	0.242006837177215	60.4107075055901	0.094478168020934	0.855188160971867	0.260325278173678	17417748.246105	109.007758877521	1.98796858806222e-11	1142775.8482	0.0724904038461549	80.9917362268937	243.903083287883	110.01383012228	0.217705	0.0157376847176422	0.5	1.54274882188286	0.153870884563951	97.6188429308134	-0.0601975630289724	-0.0964559196548608	0.289788094373122	84638330	-7.91638934929512	-1.5139854127053	0.0114387081133229	0.0330849501591534	78.7984025880485	0.757993162822785	0.776000234221363	0.783067810001416	0.761865082661257	2.17246584667792	1478263314.74282	0.0810403891328506	1.0026614274752	-0.00251370993363015	1.509466	1.4857105	1.50955027941541	1.47773913031745	0
2001-07-05	0.0921871428571428	20.1080503406178	-12378800	0.348744765045765	55.1747367560518	0.0724129476305513	0.715612702996247	0.26058468302396	6948052.88217139	105.442636268288	-3.89753318624748e-11	-846348.001799997	0.0835152692307697	82.8760060077956	243.235511591979	103.112517846528	0.183129	0.0080274884000147	0.4	1.56945508285949	0.131623869133693	97.8057208218996	-0.038771135103667	-0.084918962744622	0.339628514261525	83752270	-11.6594797498329	-0.669106129880205	0.0115499536573396	0.0329414689485516	46.0392968071075	0.651255234954235	0.734418567798987	0.766851395933939	0.669552911529081	2.10524510674392	1458226001.07078	-0.102609420567839	-1.36112897311495	-0.0276436090076247	1.507545	1.4954432	1.50132618627694	1.47903710662336	0
2001-07-06	0.0919312857142857	18.7098811575144	-88109000	0.593914006315921	47.2962763824654	0.00439418653983467	0.50384148921506	0.258390894220155	-8792733.72598743	100.084038261053	-7.7679240151221e-11	-3604767.2976	0.0877921987179495	75.7952928414594	241.413647852574	98.9667648662168	0.117817	-0.00288279672809061	0.3	2.79468557987282	0.0872177576327087	98.4018614861309	-0.0255438170187696	-0.0730439335994515	0.351193875813882	83474020	-10.6478260897721	-0.406001078180598	0.0059649282710862	0.0363582645643472	-26.4946063170697	0.40608599368408	0.624974376427351	0.71955905609841	0.435805017085233	1.62368064005365	1420359618.537	-0.164448101114141	-5.4168226082932	-0.0513160503702926	1.4882076	1.4924978	1.47108479085129	1.46659435996457	1
2001-07-09	0.0943292142857142	17.4625652376308	-3742200	0.472733641032015	51.5955034550797	0.0166900066767263	0.611689076684133	0.256010319912899	-1194347.52373815	102.805651321437	-5.54036475248552e-12	-1002758.12419999	0.0865156987179498	75.9175942436014	236.456130781378	94.6227564167247	0.065952	-0.00955397112622611	0.4	2.19699049173436	0.0464361822784554	98.6291248223057	-0.0146638310942488	-0.061367913098411	0.348886104500101	83409550	-8.82501692484435	-0.0247160870443004	0.00852173643605406	0.0367553754449381	-29.5619821617283	0.527266358967985	0.592405037274229	0.677174383157016	0.422866345508655	1.46230804136158	1466379011.91459	-0.126043339452613	-1.95089325014077	0.0299599413708334	1.4811642	1.4953152	1.46522419390086	1.46421411269829	0
2001-07-10	0.0986149999999999	17.0505775659422	-102559800	0.754882409766514	42.8341730903172	0.0102151300308834	0.317015784625556	0.24608042014632	-19601838.7838454	95.5027258649539	-2.57246206546203e-11	-3125636.17099999	0.0786965897435912	68.0819416184476	216.87106375434	89.010518590998	-0.086441	-0.0216121075166241	0.3	5.01725257659184	-0.0619032103519395	99.405500655654	-0.0111716133177684	-0.0513286531422825	0.311235314414127	84675430	-5.83210775326533	0.207857350331025	0.00410486984719998	0.0420791917613611	-100.961968955816	0.245117590233486	0.476642554927315	0.610330440413783	0.209266783954379	0.769725338224037	1394149591.04396	-0.0108457462959475	-7.28067423519051	-0.0711977136294462	1.4458192	1.4770664	1.42802112926724	1.44410518311678	1
2001-07-11	0.0969823571428571	16.6680175850885	15066800	0.615237791718773	50.8932793662291	0.0688840233737499	0.561322924817635	0.232602396764544	8533272.41337681	101.317033403162	-2.18497754419492e-11	336854.437500001	0.0755607500000013	68.4555061504831	205.78640552881	96.5723932624192	0.0179289999999999	-0.0280913861124543	0.4	5.33046707352337	0.0125003937231949	99.4671420179908	-0.00243148921640168	-0.0415492203571063	0.276912453627043	86759330	-1.68104953008645	0.0862639899700817	0.00359923611529048	0.0412174252316645	-95.4668262828145	0.384762208281227	0.446015772711952	0.555558884513172	0.226929549109512	0.71217677842712	1510259031.65309	0.103560490212989	-0.14766463638364	0.0641242666200483	1.4291712	1.4693186	1.43310008617816	1.44395114982282	1
2001-07-12	0.0979084285714285	16.8164391674811	168767200	0.211547854522529	58.9878114155261	0.140090206387493	0.875327728631201	0.234375203842355	37347091.9838166	108.548872477132	1.04834696132866e-10	14228015.5591	0.0691124615384628	70.5022279161273	195.126718758535	103.483406300981	0.0236909999999999	-0.0219473070192491	0.5	3.19320476652947	0.0153050714909488	98.8402078676773	0.0156349330310139	-0.0301123896794823	0.275788567393165	88050760	4.52720009389047	0.588446347221591	0.00666388193266224	0.0453473354376537	102.270349121222	0.788452145477471	0.560161230300459	0.557092999775601	0.566297691350173	1.29950288731211	1572349393.22814	0.0833978246858247	7.50218536237957	0.0776507032711025	1.4441544	1.4758497	1.47533139078544	1.46501348621867	1
2001-07-13	0.0975513571428571	17.0744507486975	282452800	0.102862368668096	60.8584798304835	0.21083479274532	0.938135874269515	0.225618389228551	69209949.6423755	109.519582564779	1.67631969396298e-11	10739257.7572	0.0648354551282064	71.7049420466896	201.409276689007	106.88168359396	0.070433	-0.00268187958962514	0.5	2.5344347133758	0.0452745380235979	98.232773256409	0.0301443997209359	-0.0180610317993987	0.301627987550712	90018180	5.67304029767519	0.463649787475653	0.00883113345451303	0.0452028164393904	129.829072878086	0.897137631331904	0.67248669731094	0.595557565620714	0.826344960691392	1.90742688049683	1654940542.39772	0.100740341506945	8.34178304189732	0.0199152049561546	1.4802678	1.4842377	1.51394392719029	1.48795085236073	0
2001-07-16	0.0956592857142856	17.464642670907	212786000	0.30026985177205	55.8734675102242	0.143730966238211	0.737042936250249	0.209722856285099	57786506.6760678	104.784404684824	1.50047081249607e-11	-201608.11579999	0.0624794358974374	64.8393476519178	200.609820236444	100.25105532104	0.0396989999999999	0.00509200859981952	0.5	41.4507983661348	0.026217012339871	98.1425661710302	0.0408288305116333	-0.00628305933719226	0.326150345009379	87818710	2.84844916433286	-0.455732327984805	0.000721651603249432	0.0419614728719553	99.0652020010996	0.69973014822795	0.68156784761661	0.624227659619346	0.796248223611138	2.04850791018969	1591129032.03537	-0.0191391090568528	3.01684703107964	-0.0364716262408005	1.4964036	1.4887839	1.5206899514602	1.49635651556787	1
2001-07-17	0.102061642857143	16.6230699310875	374743600	0.0474093883475298	60.3532296282289	0.227170567203836	0.970383095070509	0.191725706739674	91058788.3894506	108.636832928733	-3.53713985635746e-11	3925996.54020001	0.061494320512822	67.5269215914726	201.702172537352	105.285234569583	0.099888	0.0327372995948597	0.5	4.22928007797514	0.0641665508234721	97.7090987687565	0.0626109973953539	0.00749575200931698	0.365602236973839	91592690	8.11562727412371	0.86495745868617	0.00483472212059138	0.0436187046703438	86.8921182251904	0.95259061165247	0.771908768961897	0.673454696066863	0.968816914751965	2.52189262410771	1735497399.34269	0.138394640671573	6.09368596448859	0.0464818838386901	1.547116	1.4964676	1.54951896764013	1.51650569455553	0
2001-07-18	0.116008785714286	16.8244780893723	90490400	0.916387473148386	42.7023410036093	0.137783015737193	-0.055230577608251	0.177617785035563	37784595.3460889	89.8657370300346	-8.76268014572922e-11	-33312198.8024	0.0465208653846165	59.9041478288547	194.130436270432	89.6506649031099	-0.157517	0.0313286176670247	0.5	-2.66098643006263	-0.111833645662798	98.9621494754283	0.0601589206726341	0.0180283857419804	0.339743642900037	101791760	19.5584146360646	1.11155535163558	-0.00619743189138356	0.0642774771024176	-134.463096146061	0.083612526851614	0.54247668825847	0.629795360130732	0.367839344513945	1.38850040821732	1540375583.23563	0.378485930203051	-11.9068141368333	-0.188396179125863	1.524705	1.4769381	1.47674697842675	1.48281429554543	0
2001-07-19	0.119580214285714	17.3867024145556	-124794600	0.95807772389989	40.260464122755	0.0150381107636567	-0.199304102695639	0.190646220597974	-34750875.6442547	86.5981165493383	-3.67684681886803e-11	-44943906.9709	0.0263593269230782	50.5556342037494	187.050619603705	90.6037280536962	-0.252282	0.00824165608682062	0.5	-1.80207178729286	-0.180148194601738	100.263151339915	0.0530193113901236	0.025026570871609	0.261831793554479	107160760	22.5358792484883	0.904878293701788	-0.00966110230526124	0.0647255176352788	-152.688769670358	0.0419222761001101	0.375625217539016	0.545071979266827	0.0367316940833955	0.182061321439297	1379233986.48496	0.479444637066331	-13.8541088702987	-0.0407413063509092	1.4683578	1.4562561	1.41051731895117	1.44558587817354	1
2001-07-20	0.1127945	18.0730896001955	-13648600	0.905764772718094	40.3489395135166	0.0334966518824983	-0.0681255477596545	0.225356694000531	-40843160.3418574	87.1594233260181	-2.12482346103323e-11	-5649527.22249998	0.00696942948718049	43.2402200625974	180.633926658424	88.0175685911897	-0.24716	-0.0264141691884926	0.6	-1.98789258809722	-0.176633466361296	101.260142564803	0.0494333643601141	0.0299079295693101	0.157225502939107	108451420	18.6741592500362	-0.147785658257003	-0.00870960313239113	0.0647813208548343	-148.883027370832	0.0942352272819064	0.28182855411998	0.457324170884545	-0.0691626794091498	-0.774947682253635	1459182450.30576	0.278205096182141	-10.9625922457702	0.00100101830681223	1.4059916	1.4431297	1.36679087930078	1.41535899123289	0
2001-07-23	0.112284357142857	18.1892688034245	-73988600	0.981618745809898	38.9805296679308	0.0138157567444993	-0.0615891230817751	0.253965428559148	-55423427.8827093	85.7487657421357	2.30690987321841e-11	-778845.969999982	-0.0116693076923065	46.7823369432135	181.179012519574	92.4313781983799	-0.233713	-0.0544748353364876	0.5	-1.3178415528931	-0.171257496725737	102.190741737962	0.0411978747939514	0.0321659186142383	0.0356023574654918	107893100	12.3598462147068	0.0480016120493438	-0.0122794922818266	0.0639774068064852	-123.041587051132	0.0183812541901024	0.194012787476687	0.369553709748592	-0.157069057067122	-1.68981816146401	1402499626.85953	0.170294140346767	-9.34816449411511	-0.0222676393720661	1.3493882	1.4228959	1.32824891953385	1.38550553828146	0
2001-07-24	0.114886357142857	18.7873419164064	-161082600	0.938646471587547	37.5768762733598	-0.0529512957725773	-0.0361520016423479	0.288465029472694	-66142622.0576921	84.6844810264415	-4.41547351137852e-11	-2104742.668	-0.0240321987179477	43.6879403983733	177.625216892552	84.693866238746	-0.188251	-0.107940912731065	0.5	-1.20596164502783	-0.143240510079162	103.067323702805	0.0319212690405708	0.0321169886995048	-0.0960763677139043	106753430	8.75584066987668	1.12994520833269	-0.0137451482157826	0.0639714317699113	-128.232004720976	0.061353528412453	0.149793034455276	0.296300151317487	-0.143221199269146	-2.56991253279675	1368100570.76542	-0.0185948304664166	-7.97041945507833	-0.0232990637237172	1.272423	1.4097695	1.29294961302257	1.35584107677574	0
2001-07-25	0.117780785714286	19.7639504093106	-272052200	0.923818076329104	35.6710273942425	-0.0942191115633278	-0.0285094257276115	0.327646732515753	-72440700.9179707	82.9050543676849	-3.82672371532381e-11	-3457454.33319999	-0.0420224615384603	42.3401880054661	172.547449052374	75.8210379062876	-0.270851	-0.113458314744967	0.4	-1.21388925010095	-0.206217130648701	103.973414066854	0.0209940175759116	0.0298923944747862	-0.23549953514439	108892140	7.37365409861924	1.06975092043202	-0.0141174737201832	0.0640712639744641	-130.544294662458	0.0761819236708957	0.125255997527149	0.239285433387374	-0.102802874193301	-3.48254535905129	1340568428.95489	-0.0434234125149788	-5.94922281894192	-0.0330166791987056	1.2427128	1.3837089	1.25618374201505	1.3243521537256	1
2001-07-26	0.115740714285714	20.7489146148808	-179767000	0.889482928053191	36.3440034003875	-0.0757756101990497	0.0632344412547352	0.363126953932757	-54154045.2630703	84.3428471662851	-1.69335145993076e-11	-1848131.33679999	-0.0516886987179479	42.3272937118427	166.564344353169	74.8088983634045	-0.163279	-0.0992473361213033	0.4	-1.72359772859141	-0.128543171158181	104.554935632385	0.00420870853161071	0.0247556572861511	-0.368589421029841	108829770	4.9298540093432	0.19770675787279	-0.0100804108613843	0.0634121674588021	-113.392752403437	0.110517071946809	0.120343022333702	0.19963796303615	-0.0382468590711936	-4.13367015377416	1392053770.42887	-0.106732422342629	-3.53710882102676	0.00647624586107348	1.2251684	1.3467631	1.2342344946767	1.29998558032095	1
2001-07-27	0.1128325	21.1729581863085	-96233200	0.839948146444477	38.4809007146803	-0.0766916448061683	0.153215589565297	0.383269328212598	-36673076.2131631	86.924628500348	2.34385710694355e-11	1344059.36630001	-0.064117282051281	41.8478598053558	167.95224010339	79.1318761398582	-0.229231	-0.0799787180364223	0.4	-1.49559866827032	-0.172960125071581	104.750738164786	-0.0135018844323593	0.017104148942449	-0.482804334115616	108651340	2.29089127074977	-0.00992261891428825	-0.0108311588922718	0.0629564580518398	-81.3979647089158	0.160051853555523	0.133579299407643	0.177618408493314	0.0455010812362989	-4.46863709224889	1410988472.66329	-0.145772405597996	-0.758964499230175	0.0197073127066479	1.2121062	1.3090489	1.2274986631178	1.28435674753532	0
2001-07-30	0.105791642857143	21.431090301425	-157073000	0.843964706128338	38.3684280476851	-0.0215207235883236	0.184968453055419	0.394565852446659	-26383313.7957742	87.6551168249408	4.49817972774389e-12	931063.000000003	-0.0843239743589734	46.1144436727916	166.661292351096	75.4183266684379	-0.347688	-0.0602401705098019	0.4	-2.60973773658077	-0.252194418691152	104.834788782227	-0.0288650471683316	0.00791030972029288	-0.57776230656843	105250950	-1.59983181971752	-0.485031546466306	-0.00603545066024574	0.0607250306331945	-69.5154942209085	0.156035293871662	0.141064630895649	0.165433815960759	0.0923262607654289	-4.70162053020798	1410272993.24833	-0.168352397746111	-1.37501706942344e-05	-0.00158359034846842	1.2042944	1.2768413	1.22236777541187	1.27122024798344	0
2001-07-31	0.102526357142857	21.5770103892357	-215829600	0.862707257406904	37.8130324433893	-0.0430093430861084	0.199449201212954	0.402517719451001	-26007143.0678327	88.0485654571139	3.5167964109562e-12	-321783.709099993	-0.108113903846153	40.7178273741345	173.666691167801	90.3800547324488	-0.388027	-0.0299763605826666	0.3	-1.10188339793843	-0.279532497951695	104.8855698256	-0.0522570435399983	-0.00412316093176535	-0.655858119820207	105313180	-5.0114973305045	-0.694111713223421	-0.011294042053423	0.0570634165511821	-62.0497437313661	0.137292742593096	0.139807334794798	0.156891655572106	0.105638693240183	-4.89439898791004	1387674300.94063	-0.280908127574737	-0.0797551260178151	-0.00742287430438793	1.2004526	1.2364378	1.21595918360791	1.25884238471373	1
2001-08-01	0.0968147142857143	21.2886214973714	-139795600	0.826560311121333	39.6280921732357	-0.0679927208824825	0.253608268233127	0.400775505867783	-38702333.7171957	90.3253252619826	2.07197684983033e-11	393890.814800008	-0.122118634615384	36.6962842168347	181.830827703434	95.4909714582593	-0.313752	-0.0143643892483507	0.4	-0.468518113697916	-0.22879408431274	104.710602877575	-0.0713377324984601	-0.0175660752451043	-0.712525066547998	107708090	-6.33985637933642	-0.703824644345545	-0.0160351883596077	0.051293820910735	-45.0336539560456	0.173439688878667	0.151018119489421	0.154933810211211	0.143186738045842	-4.88903683885705	1331795992.73971	-0.37613275776195	1.38296062147455	0.0142667873981545	1.2080082	1.2253605	1.21744945573861	1.25185831476578	1
2001-08-02	0.0945764285714286	21.0060527358329	-76773200	0.724810253622431	44.5355231050044	-0.0338397906658987	0.362699270359385	0.397094274392931	-26742030.5288053	94.6830631559385	5.99074900352903e-12	2190698.93280001	-0.140613679487179	33.5782889395058	191.841838294401	99.1992733741982	-0.338083	-0.000575521438112094	0.5	-0.549874228951374	-0.236175963750924	104.132425230207	-0.0831878299985787	-0.0306904261957992	-0.737746344746604	108955560	-8.51016069090874	-0.589946524907109	-0.0146237858741433	0.05261975772714	-24.7024708988786	0.275189746377569	0.19240866178547	0.167425427402631	0.24237513055115	-4.52774936798904	1384485334.22507	-0.423485667434239	4.17872976761268	0.0391000044005053	1.2237598	1.2244641	1.23466430382574	1.25499207571745	0
2001-08-03	0.0930968571428572	20.959933303745	-123286800	0.767652163004161	42.9523617414668	-0.0142829093492792	0.341222344741805	0.400165887038972	-17995205.8352985	93.7207311304504	-8.08108256509916e-12	1056929.20480001	-0.138040044871794	34.4442279253459	203.795160126884	99.795310770362	-0.0825989999999999	0.00754423262937317	0.4	-0.622698473753349	-0.0640569174596431	103.786435597332	-0.0966876123063805	-0.0438898634179154	-0.744961364104013	107494730	-11.7912193750417	-0.403979134220801	-0.0132188449615898	0.0522718769181628	-23.2881465178241	0.232347836995839	0.205721720188927	0.180190858331396	0.256783443903988	-4.32180029904092	1389652868.85469	-0.352343558451865	1.68608938590706	-0.0162771328345821	1.2306752	1.2213907	1.23931086921716	1.25383060740519	0
2001-08-06	0.0851886428571429	20.9171081168062	-148199800	0.739679694641033	41.1316579795982	-0.0439259790106435	0.314990882266218	0.401585338590877	-16744394.0248623	92.7380054362004	-1.10425471239917e-11	-771651.22999999	-0.131608224358974	24.3435198735296	215.228118100566	100.209514288449	-0.0531459999999999	0.0117341654852227	0.4	-0.264883886478718	-0.0424727336555131	103.640780361762	-0.109543026744351	-0.0570204960832026	-0.744403194250942	104522040	-16.7221163990051	-1.8719448169971	-0.0179726943781108	0.0492566996955275	-19.2079860539474	0.260320305358967	0.22392124857894	0.194767655080577	0.282228435575665	-4.26164896622931	1374554353.2108	-0.34985518146983	-0.39055130404237	-0.0191571225467792	1.2332364	1.2187654	1.23451124614477	1.24857267878606	1
2001-08-07	0.0671088571428572	20.911669212208	-106062600	0.611553304882282	41.9905163572228	-0.0141389326529625	0.344499170958403	0.404867526530927	-17133408.7365546	93.7492417931309	-1.45563604131251e-12	-133228.275599992	-0.125652467948717	33.8765623991056	227.549374991272	104.223051244153	-0.0467420000000001	0.0156055810896574	0.5	-1.19957791145169	-0.0372202422760053	103.412766785611	-0.124020024687093	-0.0704204018039807	-0.734591229400861	101688020	-19.0357042127138	-1.90893442927723	-0.00525936499968264	0.0218908317731658	2.12506906976363	0.388446695117718	0.278763064091866	0.222766124751007	0.390756942773584	-4.1198550461243	1365394389.71609	-0.361197563123494	-0.0432774168923741	0.00625350968632007	1.2391272	1.2197899	1.23387283076318	1.24566782809769	0
2001-08-08	0.0645067857142857	21.3299141970598	-175105000	0.601081982683887	40.1506312976789	-0.0861654198543479	0.319613107835051	0.407112488644066	-23170416.7208998	92.8678388403026	-1.44652684364969e-11	-611763.49079999	-0.116753814102563	39.3979893020597	233.414558777599	101.667512366256	-0.04098	0.0117494593308656	0.5	-1.83662502375893	-0.0333018767881171	103.351723486029	-0.138811792018855	-0.0840986798469556	-0.723205280279049	99258810	-17.8069752191402	-1.13724192308813	-0.00370646605018644	0.0199256455542149	-25.9874254712681	0.398918017316113	0.318814715166615	0.25478232155621	0.446879502387426	-4.10583117107126	1339205490.89523	-0.319055875031511	-1.95401698204699	-0.018349273884178	1.2370782	1.2225432	1.22597688717545	1.2392164048072	1
2001-08-09	0.0637925	21.7182845401364	-124938800	0.548381964029014	41.3370130730638	-0.109644396932524	0.357396317365936	0.37937041082738	-17093083.1029377	94.8421960417016	-8.7694897959185e-12	-532731.437699994	-0.105170769230769	42.1933975197931	241.659441377489	100.474701139266	-0.00256100000000004	0.00140871535882755	0.5	-2.31323161378864	-0.00209734076679877	103.177293876614	-0.148525346478943	-0.0969840131733531	-0.706561217026991	94082100	-18.7975639984795	-0.795503159206262	-0.00321108865319233	0.0201367871636164	-36.4189310190656	0.451618035970986	0.363082488768072	0.290882377293497	0.507482711717222	-3.98956933816543	1366037890.89523	-0.35014705151636	-1.16730435083225	0.00790547229760122	1.2272174	1.2254886	1.2239145914503	1.23568433120589	0
2001-08-10	0.0624659285714286	21.7539322200924	-171679200	0.442347979300489	41.1612739803151	-0.154615185141607	0.371353698608223	0.329313826885903	-10830915.8496077	96.0873071543	1.8412769574073e-12	196029.021300009	-0.091966442307692	41.1492429520336	250.675372348351	100.475453466941	0.0352170000000001	-0.00393294276890158	0.4	-4.91998626373626	0.0293432357878022	103.007403698528	-0.151925935211332	-0.107972397580949	-0.685827192443356	90734840	-19.8955489382438	-0.255386346676506	-0.00175061120523056	0.0193953892140586	-25.0059428500575	0.557652020699511	0.427938999411885	0.336567917999627	0.610681162236403	-3.86696194863008	1374360860.68984	-0.312577734352545	-0.635603476550617	-0.00157610264410465	1.2210704	1.2258728	1.2218993943002	1.23244518007755	1
2001-08-13	0.0593026428571429	21.7816884101124	-134680000	0.392456530920493	41.7831547480248	-0.118363195559417	0.400657649046279	0.2599222455131	-5792330.40721393	97.6420621545717	6.50392703085467e-12	38021.0530000097	-0.0820581025641023	47.9037568273297	263.221819571921	101.59656964847	0.0320149999999999	-0.00519360731835623	0.5	11.9098	0.0265404333376321	102.796060354676	-0.158020247887383	-0.117981967642236	-0.66028163170555	89101460	-21.9016371750322	-0.85609170435929	0.000157241298998935	0.0184309282546876	0.672397966839092	0.607543469079507	0.487807155967759	0.386980997322338	0.689459473258603	-3.69947184332203	1380202361.34318	-0.314910785866633	0.0873807249010645	0.00367344341090342	1.2205582	1.2268973	1.22204992953347	1.2306098746089	0
2001-08-14	0.0560373571428572	21.6686437063646	-191917600	0.5574636534786	39.4724696343814	-0.24001398601269	0.273501567801252	0.135872336063766	-15711378.5459096	97.3872438951179	4.47760213565973e-13	-576776.751599992	-0.0735083141025641	50.9519839694335	272.701707697365	98.2686430192637	-0.0147269999999999	-0.0103913917055698	0.5	4.46930351245871	-0.0122048796616341	102.762831501862	-0.157735228819123	-0.125932619877613	-0.637415290998311	83865460	-20.815165279397	-0.66204526484012	0.00113007386275751	0.0168691431431888	-40.7594050751929	0.4425363465214	0.472716886152306	0.415559626932327	0.587031404592265	-3.67560501118047	1332919732.47494	-0.303681425436048	-1.45562414930194	-0.0190380002926183	1.213899	1.2265131	1.21446661968898	1.22491717013456	0
2001-08-15	0.0549659285714286	22.1379950017576	-264237400	0.849077367327535	37.6654370688048	-0.158911449552225	0.111373663893459	0.0995265706736378	-25139381.2690935	96.4687458906166	-2.16636095301701e-11	-1331145.14189999	-0.0694735128205131	52.1617161070634	276.140588158325	93.0373163847595	-0.0313749999999999	-0.0120322030926607	0.4	282.060759493731	-0.0262256043713714	102.830588094838	-0.165796134294575	-0.133905322761006	-0.620605569986266	73268790	-17.8188463334256	-0.243785831362974	-0.000439959038530169	0.0173472851764581	-169.879614674203	0.150922632672465	0.365452134992359	0.398857129619005	0.298642145739068	-3.73772525303588	1307510590.71888	-0.275154179263635	-2.28737697280063	-0.0156043150582057	1.2080082	1.2225432	1.20322141312599	1.21688332101918	1
2001-08-16	0.0551190714285714	22.8734805484088	-192214400	0.63083050216233	39.8140399156531	-0.0137416039742868	0.236722518805611	0.0860703611374284	-12263599.374403	97.9027967683421	-1.28057163683825e-11	-187242.554099991	-0.0606405576923081	42.3655817142277	284.133946619977	95.6409718373479	-0.00896499999999989	-0.0101139293711716	0.4	-10.2709644670051	-0.00747922307451743	102.73182964098	-0.181166970118069	-0.143357652232418	-0.602746179829472	66105690	-15.3013420084249	-0.148265827921445	-0.00104816783715114	0.0167170093483806	-171.651888341541	0.36916949783767	0.366691255940796	0.388135171726268	0.323803424369851	-3.6594006849917	1361066022.23642	-0.21089687438663	-0.95595681523566	0.0113235069924661	1.2028856	1.2150515	1.20020660875066	1.21275489901569	0
2001-08-17	0.0538432142857143	23.5564314131562	-244321000	0.913096351019602	36.1116307109444	-0.104585937844924	-0.0564198755616671	0.0879788898163517	-14171241.1737437	95.3360372864225	-3.59993960457983e-12	-483356.826399992	-0.0504325641025647	35.0560092057326	292.653432514319	94.4589488877568	-0.063391	-0.0127447301614916	0.4	-2.24485765637828	-0.0533391001538599	102.893588345075	-0.200625664724372	-0.154811254730809	-0.593718978881919	63153720	-15.62387095232	-0.15495255987598	-0.00315651821402445	0.0185503659259197	-185.359772115361	0.0869036489803979	0.27342872028733	0.349899687913289	0.120486785035412	-3.80143958616781	1327082629.61385	-0.258995294081005	-3.19645896718211	-0.031593089681188	1.1907196	1.205895	1.18581740583377	1.2026247355583	1
2001-08-20	0.0513432142857143	24.4198445637909	-181245400	0.840787184170034	36.6585505354864	-0.035850875349134	0.0256252386076517	0.0878641529356083	-6495520.26767921	95.9593263284619	-6.97044498982171e-12	-866583.41979999	-0.0429294935897442	34.9922480512654	306.425512767275	94.1298689919487	-0.108853	-0.0179329059144306	0.5	-3.17227439895445	-0.0896755179028464	102.941991636334	-0.213957613591728	-0.166640526502993	-0.587838056683598	63290500	-14.3520751608532	0.070930519826927	-0.00243060380763192	0.0185705650425214	-162.915480808813	0.159212815829966	0.235356752134875	0.311718709320484	0.0826328377636572	-3.85281218603657	1357119230.33385	-0.273044195140817	-2.14220479265843	0.00276358665151882	1.1782976	1.1994279	1.17729193722251	1.19491860182042	0
2001-08-21	0.0486797857142857	25.3322278847206	-227670800	0.891966587604414	35.3549951219329	-0.00896332491218536	-0.0018450178565783	0.0973918238701035	-2764950.78177285	95.1951043963673	-3.83360755103885e-12	-196277.800599989	-0.0364853589743594	26.0816285224164	326.655634975836	94.8148423588129	-0.101169	-0.0196820924912443	0.4	-1.38237955393285	-0.0844971107603868	103.027728954655	-0.232864104853902	-0.179885242173175	-0.585951452387301	61257070	-15.3345388798237	-0.493333885418927	-0.00424534707804765	0.0180362851042238	-139.130111510461	0.108033412395586	0.192915638888446	0.272117685843138	0.0345115449790606	-3.93770730362097	1357119230.33385	-0.286118863807527	-2.19228140441379	-0.0110987256921224	1.1679246	1.1909118	1.16733962481501	1.18628521967126	1
2001-08-22	0.0482139285714286	26.3305237892328	-184177000	0.721760188016542	38.7557789434908	0.0471708878947102	0.194219679852548	0.104537183881577	8948248.01496458	96.8025022779851	-1.50404733548226e-12	106556.349900007	-0.0244261666666674	23.5968607121586	351.53276227296	95.5905524721469	-0.058908	-0.0184677116982	0.5	-0.612181759587497	-0.0492864862274658	102.896397965068	-0.227659096788217	-0.189440013096183	-0.579411322540246	57883280	-16.4223332069409	-0.370871819551372	-0.00593759127163628	0.0143034908524978	-104.434856520428	0.278239811983458	0.221357029920117	0.255197467202131	0.153676155356088	-3.83913019835621	1395176543.19205	-0.323624047141885	-0.137075525145782	0.0160535019861418	1.1649792	1.1864937	1.16689441654334	1.18259772518557	0
2001-08-23	0.0474996428571429	26.8774570531195	-238446600	0.880393394413965	35.9468272039954	-0.0163432802744714	0.0312896028456655	0.111030613069139	7170846.47075987	94.8728651843718	5.10354179872336e-12	-291158.311499989	-0.024770948717949	23.4798911467864	364.045182140397	93.6383141372348	-0.092204	-0.02108060302427	0.4	-0.580254958660857	-0.0777504514185878	102.948679887452	-0.220736550881431	-0.195699320653233	-0.575815508001065	55982500	-15.7036365490412	0.154219474543851	-0.00635332292725711	0.0147020333740767	-99.0885451899377	0.119606605586035	0.187440221808756	0.232611718737673	0.0970972279509231	-3.89170291778645	1373755016.66956	-0.220136273022799	-1.76498085937012	-0.0222104555048019	1.1542222	1.1785539	1.15806027769556	1.17492395697001	1
2001-08-24	0.0490812857142857	26.8181905103212	-165863600	0.542880129836802	44.2192417618689	0.0251354824538032	0.413252164017186	0.113849543537747	23893266.0357952	99.0241574872646	6.56462011765842e-12	1071076.76690001	-0.0231085897435901	31.2882845270299	382.593794291907	97.276068821476	-0.0211300000000001	-0.0129646481974284	0.5	-4.08597285067873	-0.0176143664858253	102.558127627821	-0.210701662352091	-0.198699788993004	-0.558279513433191	55434960	-12.4963990426851	1.06934097904809	-0.00194996864762214	0.0191807018257272	-45.2540884824213	0.457119870163198	0.277333437926903	0.247518958467416	0.336962396845878	-3.56405235765325	1438856161.95144	-0.129872942208	2.50229664062604	0.0417868110485845	1.1606254	1.1756725	1.16839185179704	1.17749323752092	1
2001-08-27	0.0513771428571429	25.2370132460874	-121952600	0.387443560524619	47.5770808772582	0.0395878911158243	0.581028075719736	0.113571325414293	32710184.3747599	100.893227858989	7.40104508665254e-11	2258097.975	-0.0211917948717952	31.3411254579845	400.338436932038	101.014425081297	-0.008324	-0.00317165759762973	0.5	-10.8156334231805	-0.00684751628372307	102.053923141412	-0.19754761140193	-0.19846935347479	-0.524759115313533	54588520	-13.6806788372717	0.0412338971841812	-0.00105178030962089	0.0198771662291754	45.9859101762831	0.612556439475381	0.389074438443063	0.294704118459298	0.577815078410592	-3.11635060953932	1453493880.96701	0.0233887568788982	3.62391659786954	0.0186723224997034	1.1708704	1.174584	1.18274990119803	1.18367010342621	0
2001-08-28	0.0492342857142857	23.7687772150132	-164886400	0.545846986867844	43.3971839431324	0.0212703481344001	0.342164241826886	0.113368644348852	21856004.6418324	98.2223307866998	8.25286602863008e-12	-222738.658799991	-0.02169258974359	32.4993488291656	406.693718012748	99.7830157758202	-0.0397000000000001	0.00386256037719802	0.5	-5.46775072674417	-0.0331410717003084	101.900155114263	-0.185750256678705	-0.195925534115573	-0.491299113775112	53797380	-14.6881972769534	-0.475061414119232	-0.00171627538202242	0.020634934809678	35.7652702901231	0.454153013132156	0.410767296672761	0.333391844530453	0.565518200957377	-2.95272519912131	1410560080.96701	0.031590033446349	0.518917753676057	-0.02786965806069	1.1770172	1.1724709	1.18122293413202	1.18266990280326	0
2001-08-29	0.0521425	23.3243903063088	-224879200	0.847094170181505	39.3195089195327	0.0177103263338129	0.0965248390138324	0.112902659122115	-1315665.3772316	95.4931274126366	-3.23981297589045e-11	-1809561.98009999	-0.0253128012820518	32.1743502544095	397.823351225438	95.6032480947129	-0.0806789999999999	0.00305916269476625	0.5	-1.62619278311166	-0.0682821989801426	102.032130762929	-0.174614083088035	-0.191663243910065	-0.468939240265287	52995320	-12.9508143575636	0.178883061869552	-0.00449588481432957	0.0218214617259563	-42.2191973381013	0.152905829818495	0.324813474388005	0.330532387816304	0.313375647531409	-3.03693272458356	1350567280.96701	0.0890592770036689	-2.51504321053898	-0.0314676838689308	1.1721508	1.168565	1.16803928942135	1.17521573865721	1
2001-08-30	0.0530097857142857	23.708555452536	-224879200	0.72317546665915	39.3195089195327	-0.0123372000039081	0.133620346464265	0.111196356349082	-5035638.22578192	96.0047360246489	-2.98900574678973e-11	-1094778.61079999	-0.0285389807692313	24.5578561581758	390.758401267824	98.6718684504152	-0.057628	0.00775524331656919	0.5	-1.67338399021104	-0.0492441986875243	102.096597201639	-0.164925615158186	-0.186315718159689	-0.453191402621123	54452860	-7.10713997628368	0.679060528803522	-0.00438339472528615	0.0218417277765512	-112.295738007299	0.27682453334085	0.30881716070562	0.323293978779409	0.279863524558043	-3.07088846026454	1371049417.73297	0.101234281812923	-2.17630289845267	0	1.1724068	1.1633145	1.15925019294756	1.16911687708317	1
2001-08-31	0.0549485714285714	23.2945702480197	-170653000	0.39831446026791	46.6616482061073	0.0272759158509881	0.512581625909929	0.103801521829518	7355314.04864621	100.137631134228	2.86400883521251e-11	1249968.13620001	-0.0278535256410262	25.9757617575156	384.082771933467	102.373041462937	0.00704300000000013	0.00491626246661512	0.6	-6.20063473979742	0.00594722895578087	101.753665861834	-0.154258490915249	-0.179904272710801	-0.427264420027085	54838490	-7.48973985121496	0.382267895693055	-0.00176189997861263	0.024875727063178	-10.0913257251691	0.60168553973209	0.406439953714444	0.351009303757754	0.517301253627823	-2.75167232368879	1419568269.6274	0.216275511468009	1.08990202286355	0.0395871125850994	1.1721506	1.166388	1.16875812863171	1.17250908124987	0
2001-09-04	0.05602	21.9176407279755	-257706400	0.514186505751682	44.258713386481	-0.0245902605466772	0.367137544532359	0.0970900211812033	-8485791.02909517	98.7527382078698	2.82769813585684e-11	413863.755900009	-0.0282393205128209	35.4227117976148	367.587567769449	101.841498646982	-0.025612	-0.00313689657282403	0.5	-7.34955389438151	-0.0216807448680819	101.6167626504	-0.145741760844845	-0.17307177033761	-0.40088184324838	57945510	-3.49691538821691	0.419310698376048	-0.00157006757219754	0.0247437527628438	77.3526328327189	0.485813494248318	0.432897800559068	0.378305469358192	0.542082462960821	-2.60004792802527	1346056449.4426	0.325172623160735	-0.255046079861554	-0.0163044668313967	1.1635704	1.1672204	1.16869375242114	1.17179197556808	1
2001-09-05	0.0564791428571428	20.7906719905578	-167692000	0.373173005630555	47.1875996404638	-0.0133280738918347	0.561147786207077	0.0885029788659946	-13308936.9353321	100.566509696333	-5.93117398438472e-12	28438.9245000086	-0.0247422243589746	45.155685851711	342.362626827397	101.867060490359	0.0307350000000002	-0.00494460962989489	0.6	10.0687672358152	0.0262168116445028	101.341372666617	-0.135713010010626	-0.165600018272213	-0.368698106019971	60339370	-0.116076493163393	0.218871706938259	0.000710025893665327	0.0248336443455401	78.9394417341128	0.626826994369445	0.497540865162527	0.418050601292971	0.656521392901641	-2.32178671695664	1349310238.07716	0.398575842270116	1.72744020305959	0.0163044668313967	1.1654914	1.1712543	1.17505383494743	1.17469779819206	0
2001-09-06	0.0590301428571428	20.3560316880523	-238284200	0.763311090066876	40.8001229664925	-0.0436686606480338	0.0589721795322283	0.0842894607449042	-32104351.9291096	96.3750904873652	-1.47118521734697e-11	-1011267.92969999	-0.0242414423076924	45.2887799526584	319.738266215714	99.4946474545595	-0.025612	-0.00346538923176225	0.5	-3.19197545814161	-0.0223220169078367	101.518363083011	-0.131873624625193	-0.158854739542809	-0.349577565740056	60416860	0.189161509697057	-0.0200658556397322	-0.00329934702347707	0.0273779413633702	-23.5797522901962	0.236688909933124	0.410590213419393	0.415563805335111	0.400643029587956	-2.4375113516803	1286439023.76004	0.51204489618663	-2.21646213505556	-0.0457752419008207	1.1640828	1.1681168	1.16157888996495	1.16741256215714	0
2001-09-07	0.0605611428571428	20.523880097536	-298741800	0.958547306118897	37.8732442155095	-0.106108746856854	-0.146976248235321	0.0888335393276809	-50561975.3822248	94.4365518886585	-4.51492567187579e-11	-2727477.4457	-0.0232727884615385	44.9665634353353	286.455031961448	93.0533070379419	-0.04098	-0.00664082830714289	0.5	-3.89700374531836	-0.0363678055614548	101.843343622356	-0.134240191961717	-0.153931830026591	-0.346933169678854	60931430	-0.764017944725319	0.148650672698132	-0.00285161714165533	0.0269360270854483	-151.470960063772	0.0414526938811031	0.287544373573296	0.372890661414506	0.116851797890876	-2.69541354158657	1236730737.26531	0.441572940847555	-4.15972930915836	-0.0251445143457406	1.1570394	1.1647231	1.14320425997663	1.15632936903766	1
2001-09-10	0.0613775	21.0517785175083	-221530400	0.797247260822668	38.8397343285185	-0.0760799517054911	0.00519770675100853	0.0972047235721547	-42597653.516305	95.3583680865177	-1.72202759113293e-11	-629181.562099997	-0.0217212628205128	44.4292001020856	262.127978928584	91.8076116044528	-0.0537860000000001	-0.0132330561588721	0.5	-4.22683638850168	-0.0472262986742409	102.012025999303	-0.134405254118508	-0.150026514844974	-0.351639163322204	62454980	0.46495752801002	0.202213107555593	-0.00267725160935044	0.0269830588297905	-173.822050727615	0.202752739177332	0.259280495441308	0.335020606090107	0.107800274143711	-2.83129335716761	1279329423.44649	0.229720557991861	-3.24914478830121	0.00519500887335576	1.1419282	1.1570394	1.13287550665109	1.14830912012172	0
2001-09-17	0.0672992142857143	22.6952295616629	-336032200	0.626124741402946	36.2739096468135	-3.36208958648221e-05	-0.0237841598603648	0.119297455169932	-6420003.51030517	93.8129806101536	-4.60143673723906e-11	-1170544.24969999	-0.0199153012820512	41.6947788756155	255.39077411366	92.3370076788644	-0.0525060000000002	-0.0167784042599679	0.4	-3.24359724716946	-0.0471356994171069	102.297967009289	-0.134606849955546	-0.146942581867089	-0.366748856789845	66330110	5.48944495543535	0.902743820145705	-0.00345151189943627	0.0273937913379642	-220.145399281319	0.373875258597053	0.297478749826557	0.322506654002257	0.247422941475156	-3.07745091781459	1380157759.78876	0.215335463634481	-3.97513684020683	-0.0221198562476679	1.1257924	1.1446814	1.11787900443406	1.13732309828141	0
2001-09-18	0.0719420714285714	22.86613940855	-417807600	0.814981597028938	32.0179313016836	-0.0169713891965935	-0.246057479919783	0.129024781654918	-11513309.2529154	90.5047791309675	5.98150529009946e-11	-3251865.51619999	-0.0251157820512822	43.6164830402192	248.780165215508	91.3067851361862	-0.146631	-0.0313520540840595	0.4	-1.25152315548512	-0.131610103643226	102.844700878822	-0.138881092266658	-0.145330283947003	-0.399926993108457	67557000	5.6889385230325	0.631358065682164	-0.00759239453462759	0.0285544971856421	-141.968104232501	0.185018402971062	0.259991967541392	0.301668425181969	0.176639052260238	-3.55963544844143	1309989009.67585	0.368123919192375	-6.24820689433959	-0.0426875931775342	1.0967224	1.1311069	1.09272733628937	1.1200687167757	1
2001-09-19	0.0757175714285714	23.6267878540955	-324478000	0.594659292088447	39.9288945441914	0.0625672433900133	0.157512778093598	0.145602272618399	11713001.2369711	94.9935876689388	-5.50738962826369e-11	352281.601000011	-0.0297621474358976	42.2692405221724	244.968990110888	95.4571015142703	-0.121659	-0.0350835388018289	0.5	-4.66997659233706	-0.105830580154486	102.821557123283	-0.137457777476915	-0.143755782652985	-0.426403358539207	68607490	6.94675585117887	0.542173096207602	-0.00277666224942833	0.0314794079741462	-132.846894476551	0.405340707911553	0.308441547664779	0.303926132676239	0.317472377641859	-3.57055376255492	1393362221.22304	0.397531351298727	-0.526012414544186	0.0444518459884432	1.087758	1.1259204	1.09175389085958	1.11456658645284	0
2001-09-20	0.0781665	24.3331042678164	-427271600	0.937553201267639	32.5437066727845	-0.0320591313111297	-0.203791489764233	0.168935131907879	-2272005.32101941	88.2460146004238	9.90434161270696e-13	-2198830.01519999	-0.0363458141025643	34.4690891284873	229.058436518485	84.5282856839769	-0.174164	-0.0420566343224005	0.4	-0.804730077120823	-0.159964537100127	103.474347963297	-0.14348294844023	-0.143701215810434	-0.47207711892695	70146020	8.71432471807441	0.347992359642234	-0.0114483437187029	0.0345667019055708	-138.944869055573	0.0624467987323613	0.22644329802064	0.278098521124372	0.123132851813174	-4.15490634597834	1316089612.91376	0.439604785972995	-6.4997411837565	-0.0820036150063309	1.067268	1.1121537	1.06250426057305	1.09446447982505	1
2001-09-21	0.0803604285714285	25.6667743435405	-284642400	0.749011943684973	33.0414311778145	0.0248790553767793	-0.0417776737725461	0.202034749275068	6279103.75847864	89.1142387584966	-4.29727970499729e-11	-4181598.88439999	-0.0393749615384618	27.9985924303149	221.02001242399	86.1917822286308	-0.134465	-0.0457161077041795	0.4	-0.626272141831266	-0.125312700883879	103.890117560585	-0.148650567790981	-0.144691086206543	-0.524336756032318	74672150	13.4517919662011	1.1780833974315	-0.0125668089535061	0.0337548078755866	-149.2479806567	0.250988056315027	0.234624884118769	0.263607308789171	0.176660034777964	-4.5568186910125	1364238080.71291	0.482772833205699	-4.73402340993149	0.00318415234731719	1.0462658	1.094097	1.04407184038204	1.07859948349323	1
2001-09-24	0.0818677142857143	26.0103914213047	-211008000	0.590378969300916	39.915475112936	0.0107843136630085	0.195054498561944	0.211059063853622	11708566.0189047	93.6361311300006	5.27513667796575e-11	1925695.90360001	-0.0404093141025641	33.3219715106609	213.906343791273	88.6792436945075	-0.088363	-0.0415846282447185	0.5	-1.46056938882117	-0.0805572171699641	103.738577257823	-0.150219139499367	-0.145796696865108	-0.561602998894128	75200090	10.7160890829242	0.539452913337598	-0.00733416593338252	0.036804667071796	-69.6203066118234	0.409621030699084	0.292956932978874	0.273390516852405	0.332089765231811	-4.49239119642361	1373338857.49478	0.388911754824777	0.560350492741099	0.0447554837139146	1.0393504	1.0825714	1.04715089358802	1.07400121376718	0
2001-09-25	0.081897	26.7501965571846	-304609200	0.787467359391701	35.0217555127748	-0.0235298764204471	0.0208175369243263	0.230728053474184	-1583667.19157338	89.0595360395219	-2.44578083293805e-11	-1029630.80639999	-0.047727705128205	32.7178300791402	213.694239621616	87.697476443842	-0.192733	-0.0324547531940317	0.4	-1.22783994847436	-0.177052303795452	104.073507654469	-0.15437605184557	-0.147512567861201	-0.603753552355912	77558880	10.2315758814946	0.44481864889266	-0.00907282810883766	0.0385414768239539	-104.705568252504	0.212532640608299	0.266148835522016	0.270976623075609	0.256493260414829	-4.82400187021986	1320620213.09968	0.328803216805462	-3.57807504223746	-0.0569079740403887	1.0298738	1.0632981	1.02978092905868	1.05964481126406	0
2001-09-26	0.0822031428571429	27.728482103543	-428058400	0.871933812287752	33.1461611691181	-0.0867037340769085	0.00264343790909137	0.253812275729405	-25445993.9808965	87.5925056668095	-1.32757537958933e-11	-4268364.072	-0.0554524615384613	32.3203223965202	214.079165966442	87.673606246978	-0.198496	-0.040674852688	0.4	-1.03810572823524	-0.186164576315711	104.48640404609	-0.158705740165141	-0.149751202321989	-0.652367044894075	81556650	12.2862911091515	0.29216031955584	-0.0108654319168358	0.0386704449080368	-113.073360760781	0.128066187712248	0.220121286252093	0.254024844134437	0.152314170487406	-5.22679073715836	1253751221.31598	0.184363070558728	-4.88646179600162	-0.0254167393516558	1.0059262	1.0468421	1.00987695270579	1.04335830012514	1
2001-09-27	0.0802272142857143	28.6368901108757	-347498200	0.793965039033432	36.5254237588986	-0.0662176848196913	0.132819885572775	0.270004211874632	-30294169.7717001	90.27412885652	9.65323286188421e-13	-612890.12609999	-0.0644578205128203	33.1361700920397	213.492679001953	89.2918474615588	-0.194654	-0.0316407724160573	0.5	-0.783681913199822	-0.178984743469908	104.515547586409	-0.161963529383207	-0.152193667734233	-0.692835852543139	82871180	10.0450845879103	0.395840544546967	-0.0120524960599678	0.0372035776634827	-93.2087856978211	0.206034960966568	0.215425844490251	0.241158510919709	0.163960511631337	-5.32110348620473	1264004263.11204	0.0831359850465656	-1.06315203799736	0.0234842996772	1.0037492	1.0355086	1.00429130180386	1.03422406373875	1
2001-09-28	0.0782884285714286	29.1756383717279	-347498200	0.789119649923317	36.5254237588986	-0.133644203764548	0.168196569024926	0.277876218464119	-41845242.4375138	91.0852611863812	5.08676943968489e-12	928496.58510001	-0.0685172756410255	32.5447474311694	209.151532489303	91.2889769700134	-0.141509	-0.022645898551729	0.5	-0.874671340929009	-0.133209501569087	104.461840141046	-0.162113950199884	-0.154177724227363	-0.723719879208573	83805890	9.09809264098004	0.0473793067726227	-0.0108973340269789	0.0373167203487557	-77.1187766873089	0.210880350076683	0.213910679685729	0.232075900508382	0.177580238040422	-5.34117109288474	1214852733.15485	0.0603524096072101	-0.884018372997777	0	1.0009318	1.0235988	1.00056753453591	1.02675059760443	1
2001-10-01	0.0779313571428571	29.8230407124878	-295446200	0.782469162301671	36.8340165761714	-0.147382114709619	0.201953117815226	0.274729354339524	-45342867.9673724	92.1762836303936	-3.21166788980264e-12	49995.9460000067	-0.0715710833333332	25.7353809344073	214.969279370268	95.4545367336132	-0.111414	-0.0253074413243915	0.6	-0.697312472295644	-0.106132547548891	104.328597958573	-0.162351338646046	-0.1558124471111	-0.743955565990728	84212940	4.74938521559895	-0.547726438617119	-0.0119333198805712	0.0366956168348	-69.7791830174016	0.217530837698329	0.215117399023262	0.226423066680009	0.192506063709769	-5.28677898186519	1205264257.30472	-0.0660971290184047	-0.490924546227416	0.00193243967445574	0.989278200000001	1.0143143	0.998725356357271	1.02098521622181	0
2001-10-02	0.0762476428571428	30.68865428342	-354417000	0.86487786649715	33.9323900879735	-0.143010993724682	0.126728055933956	0.272763626461116	-53152190.5499349	90.1656638497597	-1.67879645773841e-11	-875108.478999991	-0.0763898397435896	26.2235287539964	213.626687896799	88.4253817419048	-0.148552	-0.0238405124215257	0.6	-0.79162291955294	-0.143366737216193	104.447821524014	-0.163998851057889	-0.157449727900457	-0.76415045450976	85014790	1.78502749739828	-0.179877250668753	-0.0109896058638121	0.0359492206739701	-91.1651631095714	0.13512213350285	0.188452310516458	0.213766147958825	0.137824635631724	-5.4313228077965	1167399088.9831	-0.151496029926586	-2.16683189349959	-0.0320391807939458	0.983003200000001	1.0064385	0.987038904238181	1.01056354054512	0
2001-10-03	0.0743598571428572	31.5303280970783	-525177800	0.873391403925397	33.5260888730467	-0.14205692155427	0.147577979859576	0.276789166897878	-70167058.9681644	90.519090154724	-4.00227933460135e-12	-1307779.37779999	-0.079874583333333	24.3837946780753	219.620837967443	95.5357792042868	-0.128702	-0.0127953351980193	0.5	-0.928251415084031	-0.125908719507334	104.506068445554	-0.167292785591898	-0.159418339438745	-0.782203634983214	90553190	9.61673676087669	1.03832145391985	-0.00954817479052716	0.0357555903621295	-104.499392974928	0.126608596074603	0.16783773903584	0.19845667831783	0.106599860471859	-5.52583760490898	1093293132.80063	-0.270017836600088	-2.02744203466014	-0.00466183853880947	0.980826200000001	0.993376200000001	0.977753936158787	1.00122180590055	1
2001-10-04	0.0778292142857143	30.734575127973	-424897200	0.602931375953894	42.9799205720818	-0.129932447855075	0.364118753337687	0.274706097699385	-58897155.1217886	96.5261898720275	2.76796808156313e-11	2506810.25560001	-0.0762707628205126	31.3355932335798	226.277515275819	100.953627208707	-0.025612	-0.00922547339869918	0.6	-2.09923190408168	-0.0248765278003179	103.930974684853	-0.16393026362329	-0.160320724275654	-0.776536479033307	90958560	9.21448592276808	0.261425141996494	-0.00562876703790437	0.0402256134928881	-21.4673306779127	0.397068624046106	0.244248034039262	0.213720463558307	0.305303175001171	-5.09075298299669	1134680050.64952	-0.239378151883612	3.03885715501726	0.058344598529482	0.985564600000001	0.994656900000001	0.990773290772525	1.0040563866459	1
2001-10-05	0.075581	30.0275524490336	-339225600	0.524798896158142	45.3959099028985	-0.108446626511772	0.446342315422288	0.261681841339068	-25028116.7890177	98.8304751237844	-5.31398720812971e-12	3602615.60680001	-0.076853576923077	38.4863013737698	237.926624778087	98.115557732821	-0.0563469999999999	-0.00367298737984221	0.6	-4.41036780263811	-0.0530882203873903	103.28555391885	-0.163289089498422	-0.160914397320208	-0.748386254434763	92530830	7.5734368263935	-0.290069161277096	-0.00289664220955463	0.0403359524393878	-9.87150742411578	0.475201103841858	0.321232390640127	0.249557772585581	0.464581626749221	-4.56161482508007	1218875142.39071	-0.244295028205132	4.01720569213027	0.0162401534013709	0.993632600000001	0.997282200000001	1.00500219384835	1.00940249816483	1
2001-10-08	0.0720095714285715	29.0114340810457	-287229600	0.356488993662555	45.9649238852108	-0.0515193519703329	0.488694322022763	0.234130794316049	293998.340048313	99.8244246405238	2.90906654165707e-11	813014.714400005	-0.0682421730769232	36.8809826195822	255.196970931505	104.247161674745	0.0332969999999999	0.00638997817350398	0.6	40.954694546946	0.0326261101994902	102.719672546443	-0.164125621075466	-0.161556642071259	-0.704104878412148	90777960	3.23554207616292	-0.45280967233721	0.000353851643205378	0.0387636297747006	60.440628792518	0.643511006337445	0.428658595872567	0.309258047014576	0.667459693588548	-4.06465065153376	1252520015.99482	-0.217321236620504	3.63580505422967	0.0037107155805496	1.0020848	0.995681500000001	1.0157687958989	1.01447513486213	0
2001-10-09	0.0672646428571429	28.0678955964856	-330736000	0.43211578221916	44.3074405903264	-0.0473787609839039	0.464385505401872	0.196749553689969	13940611.0898581	99.3726735938505	7.1589949984361e-13	-178708.916399995	-0.0596103141025639	38.4580797852583	277.10608211043	105.610528735585	0.017288	0.0154041811757372	0.6	-2.75517066820943	0.0170186545712948	102.370884232549	-0.163321650223507	-0.161909643701709	-0.654312674016899	88452560	-1.22276956953308	-0.763229259991732	-0.00377479730594317	0.0366087671328222	66.8819776600563	0.56788421778084	0.475067136508658	0.364527743512603	0.696145922500767	-3.72830805294063	1265494784.10407	-0.235064517415153	1.85671091857228	-0.0124233032808782	1.0142506	0.998626900000001	1.01867753059927	1.01629692852356	1
2001-10-10	0.0644585	26.1702653585896	-253796200	0.027960714021979	51.9564305236151	0.0286517232645148	0.803255517832137	0.162278063974494	38029498.2639825	104.758369743399	2.38763332176585e-11	1741307.33700001	-0.0537449038461537	45.7417473524243	305.582992632587	108.446209924279	0.023692	0.0274556905187253	0.7	2.4687936768037	0.0222436892808774	101.610447638698	-0.155733138667853	-0.160674342694938	-0.58413517452155	88769940	-1.5664647867415	-0.289699796381043	0.00550963039825852	0.0323741629120722	182.344280151958	0.972039285978021	0.640724519665112	0.45659333556344	1.00898688786846	-3.01466125841509	1337307258.86179	-0.207795937840061	5.10310732120037	0.0499805184234971	1.037814	1.0093201	1.03811868706618	1.02733403242837	1
2001-10-11	0.0609891428571429	25.3361490012859	-170255400	0	58.7942112742662	0.102373736071019	1.17692968812601	0.158220643544861	67395033.9020569	110.330222665392	4.34684797129067e-11	4480511.29260001	-0.0417842499999999	55.3804101852282	345.915482825569	114.377819397454	0.140868	0.0358263031287451	0.7	1.87889143631671	0.132404548098868	100.531820874751	-0.144196974154941	-0.157378868986938	-0.483506745547002	89924100	-1.1689692620388	-0.534913120327346	0.00918870903389998	0.0349170134802153	239.420590805123	1	0.760483013110075	0.557889894745651	1.16566924983892	-1.97123755888301	1420848058.86179	-0.125503348047817	7.75457120094775	0.0532528847776019	1.0616334	1.023599	1.07071545804412	1.04707493562321	1
2001-10-12	0.0619308571428572	24.9431252690834	-98302400	0.0238405164809485	60.5679295658028	0.114439017706347	1.23220931452785	0.167577565191367	91462030.940495	111.786925732798	1.27196830917403e-11	3082572.45520001	-0.0269668525641025	55.5200371389143	395.709660871165	115.894420430917	0.183128	0.0423497725825663	0.7	2.10934769947583	0.172926161315905	99.6108447968569	-0.135764668450715	-0.153056028879694	-0.362553211874272	89661180	-1.99051481165109	-0.0230991797597859	0.00700638108392737	0.0333753949314749	205.071724253023	0.976159483519051	0.832375169913067	0.649384986468123	1.19835553680295	-1.00818642724965	1484544170.75833	0.0264326704358566	7.0854698791152	0.0151048738653813	1.0855808	1.0396067	1.09820930536275	1.06636985641899	0
2001-10-15	0.0589933571428572	24.9282822627274	-177990400	0.120434579600872	60.3607575964338	0.0224768321992379	1.08049024476003	0.199828190519997	77423754.1822035	111.317376628605	1.9191046719707e-11	570961.412000009	-0.0123546538461536	63.3106273847098	433.685154814839	119.534880342359	0.158797	0.048001188629214	0.6	1.38900740669719	0.148331287383757	98.9683848564259	-0.12660184780066	-0.147765192663887	-0.235727548507281	87920490	-1.84701001784925	-0.16092419407132	0.0108784554883781	0.0283554923227178	179.580869830888	0.879565420399128	0.848105253408421	0.715625075448223	1.11306560932882	-0.259582511311152	1419681241.80085	-0.0452942203871799	5.04088181122242	-0.00111057425494787	1.1085038	1.0552943	1.11611187024183	1.08192388252463	1
2001-10-16	0.0562892857142857	24.5743784301078	-127253000	0.114900736692837	60.5062369844725	0.0669183835473324	1.01171598031314	0.220898824176576	66058651.8214095	110.847773803821	-7.8732115559726e-12	-18528.3839999913	0.00157617307692348	66.8105919823453	471.845833751411	120.226880348296	0.160077	0.0528958402432215	0.7	1.20682656062301	0.149441861638705	98.5140742236223	-0.119523013354456	-0.142116756802001	-0.112054577094478	86368590	-4.68563149147423	-0.889166424179496	0.0127504300942971	0.0266091173318316	128.226052876611	0.885099263307163	0.860436590041335	0.763895580312593	1.05351860949882	0.333323028590171	1425581938.3171	-0.141778616149823	3.33744740667008	0.00111057425494787	1.1342442	1.0742474	1.12847358016122	1.09488263115652	0
2001-10-17	0.0608162142857143	23.0699573288659	-198637600	0.421138076356163	50.3518716254882	-0.021233515685888	0.70269946939402	0.230954033068887	35547362.4816301	104.579595478727	-2.01404901967652e-11	-2298627.8693	0.013155102564103	59.7753747141598	474.291158564272	106.989886035963	0.092845	0.0433849702909457	0.7	2.00466754481416	0.0892077001745788	98.7094187664272	-0.113924550788728	-0.136478315599346	-0.0203093092486561	85271340	-4.76219507856727	-0.120922571221474	0.00700779033798136	0.032148617084006	76.5650293145429	0.578861923643837	0.766578367908836	0.764789842844674	0.770155418037159	0.312196296565004	1357150014.5141	0.0757523996100711	-3.4293139611491	-0.0583017217896704	1.1364212	1.0871176	1.11494438677415	1.09361051640078	1
2001-10-18	0.063956	21.6729948777127	-45494400	0.152620980298532	57.888267110491	0.0679240186935321	0.921549347351435	0.24467668204938	41490015.8386848	110.010981464186	-9.27285344696934e-13	2620862.13830001	0.028206480769231	62.5278867782726	473.249005377787	111.524103496991	0.188891	0.0342695087382265	0.7	1.62120434143664	0.17899346980261	98.3815190065866	-0.101614816112672	-0.129505615702011	0.0683106306734071	87788820	3.3429814180186	0.517472401142186	0.0112539679180377	0.0349551623773877	83.073214004649	0.847379019701468	0.79351191850638	0.774363868065243	0.831808019388654	0.76446382970019	1435349001.92902	-0.0072880848294179	1.18043859660665	0.0577465888340855	1.1397508	1.1006921	1.1274819245161	1.10432805887337	1
2001-10-19	0.0627315	20.5855629183061	-3796800	0.0728601382631979	59.8384431277805	0.0584772201523927	0.936839477746033	0.25753688697856	46581909.5874321	110.973030180343	2.22015687233797e-11	5352467.39160002	0.0434097307692312	66.6932231426695	473.271894569925	112.96295582193	0.212583	0.0253107922517605	0.7	1.56368689952122	0.200185221904739	98.0288205620985	-0.0892175994886202	-0.121448012459333	0.155550719141462	82742240	-1.23072850470497	-0.221799645722882	0.0123063236632656	0.03487468504556	90.9168620642871	0.927139861736802	0.838054566249854	0.795594100793447	0.922975497162669	1.24493535199071	1461008804.40055	-0.127506036383254	2.3299688626233	0.0165299135633193	1.1434648	1.1145228	1.14224361634407	1.11658968453276	1
2001-10-22	0.0628845714285714	20.3987996205781	94187800	0.0130856391338271	64.1314501774236	0.104606384955754	1.02655444363083	0.281645256503615	68925942.5921533	114.447335171767	1.86475731900727e-11	2659148.46260001	0.056100980769231	72.7676470660739	477.832569794613	118.875055515156	0.201057	0.0208149325745485	0.7	1.27963346366241	0.180430367582865	97.4729105506148	-0.0723560149125722	-0.111629612949981	0.251365118330749	83959750	0.645960667110395	0.507767917324696	0.0173688496140193	0.0331217476954502	108.694005886536	0.986914360866173	0.887674497788627	0.826287566458507	1.01044836044887	1.93030248233086	1548993376.08055	-0.0812013791627981	5.36424869502543	0.0385897442076084	1.1566552	1.1325795	1.16745207756271	1.1350041055268	0
2001-10-23	0.0680886428571429	20.749609007274	-77057400	0.303113386134806	56.2211301184974	0.0664748024064264	0.793684477258472	0.292881577840947	39236793.7743802	108.304921094555	7.21002707229169e-12	-2566019.25019999	0.0639406153846156	70.6479358792075	453.060608315306	107.847717875842	0.128061	0.0103925512811663	0.7	1.59220013469155	0.116817957178002	97.5218369588552	-0.0576288599192973	-0.100829462343844	0.325654073081516	87841950	8.52875731689026	0.00283270073571984	0.0143962272574875	0.0369018228175815	90.2366972531157	0.696886613865194	0.824078536480816	0.82555122313261	0.821133163177228	2.03845279146149	1437405738.48458	0.133407120306503	0.350319814963548	-0.0473722570034925	1.15832	1.1462821	1.16547505170847	1.13982535906738	1
2001-10-24	0.0684967857142857	20.6937497951022	16549400	0.13116270434601	60.9907085075959	0.149219534613286	0.919022216516874	0.295218753024849	44855999.5599611	111.872042974667	-2.25596642765269e-11	-2397157.1204	0.0720388653846158	70.8803695112829	419.69248947019	106.820792862809	0.176085	0.0198572747025954	0.7	1.60871838315382	0.15679251123531	97.2315701031793	-0.0436897168485821	-0.0894015132447919	0.398383393169133	86349830	7.62917335158627	-0.0688692261017572	0.0132943189787157	0.0356415435850174	87.8342850813203	0.86883729565399	0.838998122871874	0.830033523045698	0.856927322524226	2.4617129598512	1511452850.24671	0.199886460109197	3.93055690181859	0.0436852696378579	1.1834202	1.1599207	1.18144570113898	1.15320020287331	1
2001-10-25	0.0681396428571429	20.8107209286264	80287200	0.0910829368186476	62.301199369685	0.177858431587608	0.924158434534166	0.298846989159248	59070144.1713257	112.071474507391	2.26976746216531e-11	2917234.5307	0.0837163333333337	70.6730799445071	382.977174743415	106.551959465729	0.204259	0.0245727811298558	0.7	1.61251668339065	0.181800839559304	96.9641498947534	-0.0230405847833066	-0.0761293275524948	0.468845505561899	85508710	4.27883749825868	-0.295743588942194	0.0130294481399252	0.0356306835261303	102.548420316164	0.908917063181352	0.862304436308367	0.840790494133254	0.905332320658592	2.86482154909011	1568173164.06563	0.204462100126103	3.17203469703757	0.0125850250431153	1.1986596	1.1692052	1.19721513409266	1.16693725689635	0
2001-10-26	0.0670172142857143	20.9887802643239	10546200	0.225562316827721	57.7724878256162	0.174488613018767	0.78637311923081	0.299805774058986	44240807.2108133	108.037729130724	1.30826558265582e-11	-671318.781699994	0.0862241730769235	71.3480574233784	355.86652128429	103.779873029046	0.118457	0.0249015745250661	0.6	1.94580032826661	0.104349048876141	97.0547587812014	-0.00678738595382145	-0.0622609392327601	0.519975739313217	84431900	2.05651995395144	0.293621587572261	0.0108283783282768	0.0371687607260598	98.8316486827157	0.774437683172279	0.833015518596337	0.838198835620949	0.822648884547115	2.91253601482797	1509500835.66563	0.0420894110087666	-0.222681086964226	-0.0274712722596661	1.2033978	1.1734313	1.19662942272844	1.17212284655156	0
2001-10-29	0.0695682142857143	19.5168840734268	-49249200	0.521159887774474	49.9518136604571	0.146072363237621	0.563341386974526	0.28769746635161	18271405.1377053	101.406360568455	-6.32049388414492e-11	-3151995.80639999	0.0809580641025649	70.0711591401663	318.017078289681	97.8901263184001	-0.00704300000000013	0.012205663103793	0.6	2.86084759248411	-0.00621962243851655	97.6389365821163	-0.000453202418912113	-0.0498993918699905	0.531608007005557	84819070	-0.698035349405698	0.318020681211546	0.00773139825639726	0.040870289889431	-5.15430941021546	0.478840112225526	0.714957049806067	0.797118240349322	0.550634668719558	2.45717511732335	1453058697.35507	0.17554694960325	-5.21503724886673	-0.0573157865370553	1.1855972	1.1711262	1.17404161515229	1.16425796536036	0
2001-10-30	0.0697723571428572	18.8512449361925	-118440000	0.692731011127237	49.7426232381363	0.173423993271945	0.537235580043003	0.264996468925426	8840631.39484048	100.496783321749	-4.17200758988189e-11	-2057405.40179999	0.075938243589744	64.3088578550146	315.510276572114	103.590357813227	-0.0262519999999999	0.00863761387719559	0.5	4.58247697851328	-0.0230276535846813	98.13038344253	0.00972812084408092	-0.0379738893271762	0.51623408890078	85330070	-2.01868347945127	-0.106155392084265	0.0039490894072041	0.0389375504563678	-90.6298084795346	0.307268988872763	0.579061029494966	0.72443250339787	0.288318081689158	2.05907911155405	1463364718.6946	0.277964791324677	-4.15682307877999	-0.00170315728078346	1.178682	1.168501	1.15834274343486	1.1574737898403	0
2001-10-31	0.0701295	17.6135724297512	-186877600	0.706815982759379	49.445216188006	0.198683983821499	0.498493607198288	0.232546564200791	-10073964.1470773	99.535145958539	2.82077868014074e-11	-154126.328999992	0.0686690512820516	63.9130728184781	306.230327925692	97.5555221997697	-0.0275340000000002	-0.00970771169349593	0.5	-141.404980340747	-0.0241930703056897	98.5484189978438	0.0208501115483826	-0.0262090891520645	0.483000756293039	80213910	-3.1360923410548	-0.199412754077109	-0.000120177086840978	0.0360995834471357	-54.262715992841	0.293184017240621	0.483768692076851	0.64421123295753	0.162883610315492	1.70584381189509	1412037516.73461	0.0964997256225386	-3.8686664026711	-0.00227599097595631	1.1608812	1.1721507	1.14702282895657	1.15145728259661	1
2001-11-01	0.0717111428571429	16.8763386208243	-108628800	0.374472207935122	56.6333842109428	0.212464478430208	0.741419287908059	0.210756623232844	248720.328346252	104.570427563977	-1.16201081677953e-12	2492702.98760001	0.0632921602564107	64.1745671615335	294.672104695893	101.584700712684	0.037139	-0.0197112793158773	0.5	5.60998324105305	0.0316975348886141	98.4041260879857	0.0344167183523529	-0.014083927651181	0.461353703185563	79112320	-3.00777460184444	0.0838803657533163	0.00298250362729231	0.0392487365211676	-4.646022568282	0.625527792064878	0.531021725406193	0.606481397107085	0.380102382004411	1.86752028384412	1470851206.77359	0.197032275285078	2.10549581385554	0.0570011794492517	1.1531976	1.1759286	1.16146055263772	1.15852614030631	0
2001-11-02	0.0730887142857143	16.0603317512637	-157929800	0.382133416264967	56.4654504486772	0.168466462715104	0.722737817507651	0.186228363686321	6690129.70813918	103.748823936268	3.60073832173792e-11	2548794.26270001	0.0641869487179492	63.2584279217372	277.371083657802	97.634064090637	0.101169	-0.0223457071993895	0.4	5.61010225295941	0.0889225104656914	98.3359357012026	0.046841201556018	-0.0018989018097412	0.445829669833198	77293790	-5.86965310258008	-0.480174645024277	0.00298491727487766	0.0392484665291929	53.6474977133687	0.617866583735033	0.559970011515807	0.590977601909992	0.497954830727436	1.96214140925828	1479303370.21359	0.213949735824182	2.57779858442277	-0.00107674621259318	1.151917	1.1776574	1.17065870175848	1.1640768420688	1
2001-11-05	0.0741601428571429	15.056564424833	-98981400	0.190663014485126	59.6831202633938	0.162653821206241	0.863472790385522	0.16696334417114	15450126.6785057	105.694860589893	2.03962094645484e-11	912039.22250001	0.0611290576923083	67.9741889292214	283.950093006295	105.126812171282	0.068513	-0.00651057309140789	0.4	3.79058210162701	0.0577445711762673	98.0875465404012	0.060624878359401	0.0106058542240872	0.443754465341417	77641410	-7.13620260575489	0.149999173735303	0.00482874238823572	0.0397567181972239	107.562772568486	0.809336985514874	0.643092336182163	0.608349180000715	0.712578648545057	2.23154035879727	1505093456.40163	0.0977423564627402	4.95318849019178	0.0265686495446614	1.1703578	1.1779775	1.18746246783899	1.17443923441993	1
2001-11-06	0.0723235	14.5926755301156	-19976600	0.0212258965445532	62.6556776828111	0.196026588998184	1.06243690476555	0.139931175716645	37861862.2763202	107.403561670805	6.56234079448356e-12	2208325.3514	0.0579808333333336	74.2660990230437	293.229481381492	103.271750892337	0.0813189999999999	0.00706933671019948	0.5	1.8675799086758	0.0670964429043328	97.717686515429	0.0782245031009856	0.0241295839994669	0.458538922080631	79416330	-5.89016325660265	0.10142645030751	0.0107469107035083	0.0358814521436681	128.037442923546	0.978774103455447	0.754986258606591	0.657228206202674	0.950502363414424	2.63013224609687	1576849029.71715	-0.01507567343617	5.82193212406968	0.0258817852913848	1.195586	1.187134	1.20933697855932	1.18873864634358	1
2001-11-07	0.0706122857142857	14.8353907159512	75770800	0.188551316207562	62.773942923492	0.12819834224761	1.03373364181969	0.131910284146707	34514079.9063709	106.702299684746	2.78337235528066e-11	1326035.04810001	0.0498415256410261	73.2008731941389	290.67217959578	102.084469307933	0.0364979999999999	0.0248454709742154	0.5	2.35944906537877	0.0295284527327482	97.4823270602285	0.0949136182470633	0.0382863908489862	0.480962582589495	80356710	-3.08312678456918	-0.469659957733818	0.00657375285234528	0.0330690749367071	178.163320407869	0.811448683792438	0.773807067001873	0.696087826469074	0.929245548067472	2.91441329888276	1543339199.07123	-0.105089015939247	4.06378499113071	0.00102175403602386	1.2215828	1.191232	1.22434698570622	1.20067107428111	0
2001-11-08	0.0746938571428572	13.9855588363203	-9765000	0.46400410627429	54.5851300638162	0.0342417720345031	0.637175069895787	0.128513211234296	10620248.174655	101.640574171902	-3.21922917070981e-11	-2348559.41949999	0.0436970641025645	66.6194464017512	281.386273289589	100.214227517822	0.0364979999999999	0.0285833909592149	0.4	6.74721394681674	0.0309390062000091	97.7403219781605	0.101551570689597	0.0509394268171083	0.486269757671698	80456460	-1.94501259543922	0.718491428565365	0.00217455636295003	0.0356211530037145	73.7379430030838	0.535995893725711	0.694536675909819	0.695570776282656	0.692468475164146	2.7231120284847	1475947494.10225	-0.0458357983312602	-1.61264824082021	-0.0459617035362316	1.2231194	1.1881585	1.21557099047081	1.20018887895727	1
2001-11-09	0.0732652857142857	13.1663375562407	-9765000	0.46400410627429	54.5851300638162	-0.0170757077462097	0.614764260267204	0.123738756873479	-4952360.51904583	101.447685473468	-3.51044279101906e-11	-2409885.62919999	0.0354468974358981	61.4687060469281	280.834802351085	106.125882079893	-0.015368	0.0297960947731605	0.5	-20.1520812182738	-0.0127462634378488	97.9705155096648	0.106398296021166	0.0620312006579199	0.479121940552885	78537480	-6.53617088684021	-1.07107623669625	-0.000635729299643308	0.0339772077098905	34.2600285673781	0.535995893725711	0.641689748515116	0.677610433693476	0.569848378158397	2.54202761634477	1457722509.64625	-0.0274827391355813	-1.71600477793752	0	1.2249122	1.1884146	1.20972032698054	1.19979435551049	1
2001-11-12	0.0715306428571429	12.8936621960762	40609800	0.451479969691785	54.8953947945791	0.0346724040751536	0.622382620708061	0.12269244954072	-6479752.92181301	101.455593060466	-4.15607184842424e-11	64530.1188000068	0.0266714166666673	69.1703440254307	280.131158065054	106.534125445341	-0.028173	0.020665139598616	0.6	4.0982470444354	-0.0231950415249748	98.158342670474	0.110773734788769	0.0717797074840897	0.463997256105997	77071820	-8.44207549764623	-1.22360539751679	0.00282185872780407	0.0313367677153498	-1.80358230785387	0.548520030308215	0.610633175779483	0.655284681055478	0.521330165227491	2.38815967540082	1473126547.5178	0.00344510448446944	-1.66080056878083	0.00213624695598935	1.2208144	1.1955861	1.20667388465369	1.19993738178131	1
2001-11-13	0.0681632857142857	12.3932613425102	96777800	0.257414513724244	59.5112657675066	0.0649102921186883	0.866847267427124	0.123623762889341	7432777.17061973	104.426138259473	2.599164198476e-11	1179436.83480001	0.0225997371794879	67.9804157911184	289.340887930608	110.307608706286	0.0448220000000001	0.009303156355346	0.7	5.12002276854688	0.0368077850230508	98.0545433945247	0.118851524420402	0.0811940708713522	0.455998436857064	77343350	-9.25170307619214	-0.510755830702397	0.0019942138238121	0.0302822226817339	65.6928717204207	0.742585486275756	0.654617279278241	0.655062213796399	0.653727410241924	2.50453869790981	1525989527.15586	-0.0451069817569392	1.32520881352087	0.0325315542883595	1.2182532	1.2069196	1.21787592310246	1.20727240327562	1
2001-11-14	0.0664286428571429	11.8131980420642	152065200	0.182294136338083	61.1678679087755	0.118483069791575	0.93442477262862	0.12087104256757	15808456.0875411	104.978574713359	3.11549056385361e-11	1539707.45390001	0.0242743589743597	67.7559786388752	296.906261274791	105.48677012205	0.126781	-0.00126121329243928	0.8	5.12002276854688	0.106437388570359	97.9081442324953	0.123451099464987	0.0896454765900791	0.45587146659507	76538490	-9.93327605933637	-0.142232758709753	0.00197459914372736	0.0302748675823672	106.971252657425	0.817705863661917	0.708980140739466	0.673034856110755	0.780870709996889	2.66634659912595	1538520319.56234	-0.0759988716629013	2.54486476156714	0.0123138170102527	1.2185092	1.220046	1.23046628206831	1.21606778449823	0
2001-11-15	0.0666327857142857	11.2986044549274	98807800	0.232376017402782	59.4222832812592	0.0593268845876732	0.824971006490478	0.120447831646945	12986280.9518259	103.719487789453	3.63041229951146e-12	151989.706400004	0.0276688141025649	61.0207641963963	300.814130045365	104.738805185631	0.118457	0.00198145613735962	0.7	3.15115774723075	0.0999479376274437	97.9076950209636	0.122377399506142	0.0961918611732916	0.455411428209818	71544200	-10.6502389139031	-0.269651618047387	0.00332732973557809	0.029282804012155	92.0776201945907	0.767623982597218	0.728528088025383	0.691532600082298	0.802519063911555	2.69241216096134	1520238891.85537	-0.201097282378287	1.83244689114716	-0.00819260822369866	1.2279858	1.2255526	1.23544485471221	1.22140127822583	0
2001-11-16	0.0662771428571428	11.2933192064777	41141800	0.382621660596876	54.4061242912508	0.0521327411676734	0.59887713391408	0.117483333662039	15104638.3332541	100.979428135145	-5.27801573284085e-11	-1158993.28649999	0.0321633269230779	60.9774349421956	301.945877385546	99.4756238381092	0.090284	0.00260014615264305	0.7	1.97172263337544	0.0772355243920018	98.1528469662184	0.117692214928746	0.100491931924383	0.443332413208219	72342620	-10.5796197663324	-0.0362609898517299	0.00554342939357738	0.0253864625904691	6.75945907040492	0.617378339403124	0.691478171817964	0.69151445732752	0.691405600798851	2.47901320206736	1536437186.07758	-0.141651670762156	-0.905474617504552	-0.0249884042113982	1.2313154	1.2281138	1.22851890314147	1.22017686400295	1
2001-11-19	0.0670424285714286	10.6389916442016	124289200	0.0621180338449746	61.8485203786444	0.0439672523384562	1.01513230581952	0.12400619493751	35891583.9450033	106.185279535691	3.70092157782444e-11	1855686.40740001	0.0347860641025648	68.9871626204325	303.274144593357	102.197215514338	0.0902829999999999	0.0106261970636315	0.7	1.55702799467234	0.0731079345772282	97.9186328131278	0.118539121472689	0.104101369834044	0.444079115080998	71600760	-7.25133378603583	0.183747030550336	0.00954329156774106	0.0283908357479293	101.773250607594	0.937881966155026	0.773612769930318	0.718880561528452	0.883077186734048	2.71506650143867	1611955149.73146	-0.0375277429693812	3.31466321446948	0.0528735896344781	1.247323	1.2340687	1.24588560209431	1.23116634327514	0
2001-11-20	0.0657158571428571	10.2959248787236	55143200	0.234869454259913	57.2558745890691	0.083712509938126	0.771500408199152	0.130496254128713	24369901.2548096	103.308763605112	2.03334249269661e-11	1701428.80040001	0.0361159487179494	69.2496602978356	301.507673181251	99.6937100545534	0.0614700000000001	0.0124537767774531	0.6	1.87190580423381	0.0504045891409667	97.9864775751651	0.116907496744021	0.106662595216039	0.441288258989392	66495800	-6.27786039438104	0.010297829976782	0.00802713654053538	0.0296109759941149	112.570819432022	0.765130545740087	0.770785361866908	0.736182161641271	0.839991762318181	2.66979418144402	1548736344.85146	-0.102923272712397	0.21383331953185	-0.0237800916488547	1.249372	1.2338126	1.24743206806288	1.2346860990433	1
2001-11-21	0.0606648571428571	9.60085116212099	105539000	0.248025675938533	58.3195830413018	0.0507342397083472	0.8048133282847	0.133159063857028	24515044.9072039	103.90156614752	-1.83438922291144e-11	-798439.230399988	0.0352580961538465	62.6258081116287	317.051961243539	105.184391900295	0.039059	0.0127009528514038	0.6	2.4876367601168	0.0314865731326028	98.0072940080537	0.121164073917557	0.109562890956343	0.437836586793083	64335250	-7.72767115236201	-0.439985655567842	0.00438591621080021	0.0257945154649231	67.1979559986961	0.751974324061467	0.764515015931761	0.745626446404767	0.802292154985747	2.66508402830132	1576732850.15064	-0.137300811016106	0.716465682845643	0.00765063353629752	1.2502684	1.2343888	1.25166437870858	1.23931208103543	1
2001-11-23	0.0590322142857143	9.1489042968208	120540000	0.18159891071776	59.4780431388246	0.012016544710058	0.83495610126169	0.138577332180164	23814460.2052672	104.566877335703	2.75835919938672e-11	318843.254100005	0.029679993589744	61.2112493625869	339.165625154262	106.039553629784	0.017288	0.0108650555086952	0.7	2.28584412882314	0.013702036472363	97.9892357692566	0.12090660669313	0.1118316341037	0.43568064765287	61898410	-13.5613987684533	-1.18982749927184	0.00504350812086568	0.0257618861249376	92.794832151473	0.81840108928224	0.782477040381921	0.757909977730485	0.831611165684792	2.69574135822293	1583049264.29056	-0.274058163161577	1.33650353190676	0.008097248631145	1.2552628	1.2416243	1.25790091913906	1.24495970266535	1
2001-11-26	0.0642873571428571	10.3920933643635	235712400	0.0542384178598243	68.4953397380394	0.127702689575324	1.24176692704897	0.163331042162731	47885634.3116646	111.835001443154	5.89276303437282e-11	5718389.87790001	0.0308784423076931	64.0514696345649	364.070945457949	113.973234625569	0.113974	0.0212606151053471	0.7	1.74662207272797	0.0869679942738484	97.3700768523211	0.126727175409043	0.114810742364769	0.4628829214397	64169980	-4.98442127673695	0.669767651254208	0.00862864507624091	0.031821108150684	233.818754959359	0.945761582140176	0.836905220968006	0.784241725476326	0.942232211951366	3.31235295990633	1673394416.38553	-0.0523069951016902	7.39589948794285	0.0742877118375093	1.2859976	1.2586565	1.29471427942604	1.2673926658171	0
2001-11-27	0.0639301428571428	11.554328945137	168574000	0.156298786825506	64.7432868157241	0.169684398966128	1.02822990746747	0.176314115127106	53011268.0908265	108.93810563225	2.58375049375618e-11	4846259.33820001	0.0364483461538467	63.832063273475	374.156297253075	108.415035314606	0.146631	0.019818543801612	0.6	2.38939978732622	0.115464396807813	97.1246417020906	0.126731315762193	0.117194857044254	0.496621643064632	64537130	-4.3851248592292	-0.162752449648288	0.00551912409452206	0.0320957356551789	200.631147559219	0.843701213174494	0.839170551703502	0.802551334218718	0.91240898667307	3.59596288113659	1672077579.65604	-0.0753597463484089	3.77203414486948	-0.017465301002267	1.2988038	1.2730634	1.31135951961736	1.28143945385036	0
2001-11-28	0.0639301428571428	12.5618275100014	105921200	0.282935183743546	60.2299123289621	0.128372929846875	0.854195920273945	0.169027765444661	38413074.8738148	105.696743432709	-9.85843708501461e-12	-1738024.59879999	0.0424410320512827	54.881137809124	373.939678667757	104.691525564112	0.116537	0.0237258026395042	0.5	3.43922836911767	0.0928296066963149	97.187947551718	0.128754676088178	0.119506820853039	0.520784026372945	64210230	-4.41029638091232	-0.424105100564265	0.00384749399968116	0.0329461334900715	129.089453781529	0.717064816256454	0.798468639887819	0.801190436108418	0.793025047446621	3.58281305503214	1628221825.71943	-0.0422826920909155	1.00864754452636	-0.022634790111498	1.31161	1.280491	1.31242501307824	1.28746064405938	0
2001-11-29	0.0597975	13.1265804905075	55230000	0.312576533510632	59.189806193661	0.16677511375296	0.798890308924919	0.157692154438817	27708081.533787	104.362033560367	-1.81506890742378e-11	-1121271.08799999	0.0457369102564109	56.8940420017915	376.987920537979	104.987144713113	0.106931	0.0268030120054204	0.4	2.02016854543781	0.0853204884453334	97.3284841875756	0.126090854850626	0.120823627652556	0.533384168469864	63322910	-5.87226744256573	-0.523182676244598	0.00667342250977081	0.0300068666378266	78.0749299085576	0.687423466489368	0.761453582088336	0.787944818101724	0.708471110061559	3.48553444246809	1623251227.10298	-0.0840600742153296	-0.260502682452964	-0.00537287129499214	1.3210866	1.2856775	1.31078734205216	1.29110634513949	1
2001-11-30	0.0622975	14.3415587433323	131208000	0.0754625674862502	64.4748139627861	0.166510790930839	1.04067937318606	0.156240352322304	37350514.6452017	108.110897496187	2.46817499802575e-11	1962069.76560001	0.050247820512821	62.9621589755305	383.951089550294	112.2826256085	0.12358	0.0315427757821822	0.5	1.69325697647306	0.0949817542791909	97.1244974899451	0.126784327554424	0.12201576763293	0.553124948002504	63209370	-3.82126385041582	0.816709737927578	0.00975167887977517	0.03144560257323	109.246878681758	0.92453743251375	0.815814865563474	0.797234833922307	0.852974928845807	3.716758454323	1681352050.63239	0.0372810099096199	2.6836383101989	0.042192820122217	1.3397838	1.2975233	1.32847822803477	1.30433428238686	0
2001-12-03	0.0595933571428571	15.469752835241	85916600	0.16330350269438	62.017642411406	0.171960425593453	0.915554242452756	0.156714574477557	41765696.0169556	106.17373537371	9.26080603602454e-12	1778091.80640001	0.0533508782051288	68.4204128098419	385.887650069746	105.250039238837	0.0922050000000001	0.0186003297182124	0.5	1.87690038214292	0.0708612365892632	97.1269182770983	0.12875430235793	0.12336347457793	0.568725005563686	63008890	-5.99546146911097	-0.106373881044199	0.00876054991948348	0.0319191278257644	91.3986115086197	0.83669649730562	0.822775409477522	0.805748359107379	0.856829510217809	3.7514726192206	1696004081.02501	-0.0136366137958132	0.501331527888631	-0.011806700679675	1.335686	1.3108418	1.33493615202318	1.31224659468016	1
2001-12-04	0.0655117857142857	17.5081531818544	181021400	0.0420539426721129	68.908320706379	0.20787455356328	1.21424052792876	0.175382883022979	63005236.5823364	112.04205168345	5.52955116566147e-11	3748012.1952	0.0599058782051289	70.1531405200505	400.654295210097	114.695347953859	0.188892	0.020246158656067	0.5	1.67598792239748	0.141214372719341	96.6519114690178	0.142344586791936	0.127159697020731	0.604292148529662	64816710	-1.46476880471253	0.526632241748789	0.0109795973321661	0.0346978247257767	145.846088236417	0.957946057327887	0.867832292094311	0.826443003436356	0.95061086941022	4.25695931626568	1774568349.49544	0.139411499686922	6.07736686222777	0.0621605279063792	1.3536148	1.3262093	1.36805543468212	1.33443703201104	1
2001-12-05	0.0711750714285714	20.1989338713505	323166200	0.0525921098200478	74.0214151807103	0.219640747494806	1.31263760174675	0.223364949693149	95816710.1145546	117.612143602874	8.80684950909210e-11	10299651.2976	0.0703684230769237	73.3972074284476	409.835400445149	120.731766350905	0.306709	0.0298817444394139	0.6	1.50016864384958	0.225145223359233	95.8632569370947	0.161735849346402	0.134074927485865	0.672573727600723	67973710	6.91549644233022	0.944301221885876	0.0144313292526784	0.0371648571822237	212.815951419776	0.947407890179952	0.894357491456191	0.849081166109635	0.984910142149304	5.10704515645086	1875444959.20506	0.361261087517373	10.1189584351193	0.0589424464284937	1.3949788	1.3532944	1.41916228978808	1.36842593528176	0
2001-12-06	0.0755040714285714	22.6975159401683	238432600	0.223708717266279	65.6440914525869	0.242588982191072	0.998111966189842	0.249090169950867	99091132.5173275	111.877859719431	-1.46171117478781e-11	3530610.03680001	0.0724453782051284	70.3339285265916	400.005522604324	114.818628214998	0.178007	0.0365264114213738	0.5	1.85302655628427	0.130151341933317	95.7376209509259	0.17500563016591	0.142261068021874	0.734126646343447	67423020	6.99973023478383	0.464375455139891	0.0120680137965319	0.0396788439984989	148.478243774609	0.776291282733721	0.855002088548701	0.851054806922657	0.862896651800789	5.32254412992283	1870460835.0322	0.501427949204148	3.77346588375907	-0.0421202917914381	1.4252016	1.3731441	1.43231685985872	1.38482594704871	0
2001-12-07	0.0742533571428572	24.7997892535897	187553800	0.291342633581393	63.7414448792097	0.320464402243909	0.901436120624665	0.257160836315993	98469114.8168597	109.667694101434	-3.13371668750046e-11	-3049469.3992	0.0762420384615388	70.1657559839629	390.806520378029	105.475024135066	0.192733	0.0351463193052551	0.4	1.7336781353865	0.143339594849856	95.8103829827144	0.180999197076224	0.150008693832744	0.779779343160381	65690170	3.49209360854616	-0.125221411221123	0.0130782163457369	0.0388425456442356	103.531257474475	0.708657366418607	0.806220514505336	0.83611004278355	0.746441457948909	5.3321043502812	1896974715.34927	0.536051254605479	1.05355581213137	-0.0105918387323158	1.4410812	1.3904325	1.43596390657248	1.39544995667622	1
2001-12-10	0.0725697142857143	26.9192615444438	187553800	0.313667146486847	63.7414448792097	0.326160268972366	0.858254207892581	0.260221622002203	87159260.6288536	108.65531018877	2.32636404361145e-11	-390952.699199993	0.0817750192307698	69.1998506306305	386.820043386599	107.333358122932	0.183129	0.0426241629013321	0.4	2.01395976575397	0.135688961313558	95.9380732711591	0.186630258839592	0.157333006834114	0.809557827058827	66136630	-0.35904331728148	-0.671049685828962	0.00919990472382145	0.0370811890072081	94.0451897292694	0.686332853513153	0.766257960841275	0.812826015469458	0.673121851584909	5.27311037694596	1889145330.24077	0.172490211024246	0.125846026623271	0	1.4601624	1.3979242	1.43839527104832	1.40414232818963	0
2001-12-11	0.0751207142857143	27.935897628144	136185000	0.470378349482986	57.6092682114324	0.283879669971071	0.690151665389573	0.249433142568026	63143075.883477	104.230446991049	-3.35255191478096e-11	-1249905.64159999	0.0842213397435907	63.3174766685215	379.316646573284	106.088595693147	0.12422	0.0339505849792706	0.4	2.25670316546483	0.0932919881802719	96.379322334074	0.1856220850827	0.162990822483831	0.810500387856616	66186330	-2.50280109584631	-0.297189226905125	0.00847000587662665	0.0378666030608746	51.6547287086886	0.529621650517014	0.687379190733188	0.771010407224035	0.520116757751494	4.88379379050987	1848905617.85773	0.173288692934408	-3.77028973690249	-0.0342997245021412	1.4522224	1.4029186	1.42379484736555	1.40240626851879	0
2001-12-12	0.0757839285714286	28.2332109004356	88069800	0.568548971938088	55.4184199946335	0.235067287879431	0.615132317109329	0.238710983019758	43987008.3812342	102.323561523991	-4.5112109343825e-11	-1696631.21599999	0.0789018653846161	63.1598766005082	370.415095340771	105.239951908663	0.00768400000000002	0.00989823857209385	0.4	2.68542288873356	0.00559985080690611	96.8763345610351	0.180800309307108	0.166552719848486	0.785795308890891	65783690	-4.62824042019216	-0.0463097027639598	0.00697036582606705	0.03831339593623	2.66835071698284	0.431451028061912	0.602069803176096	0.714696872541389	0.376815664445511	4.41622574571001	1835261399.05588	0.11911150307332	-4.41103342461747	-0.0134044255358565	1.4231522	1.4090655	1.40787156491036	1.39760967424265	0
2001-12-13	0.0792022857142858	27.4196969946373	38609200	0.703182062780269	51.8317168933738	0.224747956046935	0.502324281257958	0.230231080394745	31490272.602397	99.6606653106324	-5.5156781357282e-11	-1222638.73689999	0.0753801730769237	59.5680436341598	355.323499698492	98.5914976610502	0	-0.00887080937218143	0.4	3.89006360055057	0	97.4845743601303	0.173837439360407	0.168009663750871	0.735676608405833	65492350	-6.15782599906035	1.1930595274879	0.00476098692727963	0.0391246265332962	-52.0861294364844	0.296817937219731	0.500319181190641	0.64323764209114	0.214482259389644	3.81891646202099	1832905755.54655	0.224053770023612	-4.63938454053831	-0.0230651518091731	1.400357	1.4127793	1.38679770994024	1.38798064256217	0
2001-12-14	0.0750024285714286	26.1793854614396	-8862000	0.916456140350878	47.693418433913	0.232877715277086	0.362262715630518	0.222318607669649	21112470.0873148	96.5503960712238	-3.99123172260235e-11	-1703001.96289999	0.0726629358974367	51.7723841688867	338.229024026491	96.864566732846	-0.00896500000000011	-0.0248602952338521	0.3	-4.35776303317535	-0.0068431542084918	98.2188492926064	0.168740097871146	0.168155750574926	0.660173883456205	65203040	-7.61206612111262	-0.886306924856413	-0.00282218219522438	0.0339707965554816	-96.2632344312417	0.0835438596491225	0.361394074010135	0.549289786064138	-0.0143973500978714	3.08058507465578	1823925591.54178	0.0785921568285119	-5.70372642336162	-0.0294779443199898	1.3728236	1.4069524	1.35972880662683	1.37300070755086	1
2001-12-17	0.0739310000000001	25.1927472485806	34566000	0.859040935672514	49.3359142597948	0.224967980977223	0.382646536494182	0.201859464011438	15674867.3767865	97.2595328954174	1.0580738095238e-11	-607306.722399987	0.0690262948717959	50.4885502255554	317.612672782226	92.0535120414643	0.0128060000000001	-0.0415086206001382	0.4	-17.0666341054984	0.00974652194016062	98.7117069981869	0.165167705727211	0.167558141605383	0.576413526016184	64491140	-9.28675399451099	-0.435651766097017	-0.000779781068353873	0.033891980662995	-77.8525042790877	0.140959064327486	0.287915737449252	0.462165103192509	-0.0605829940372631	2.5523708182962	1826606017.21197	0.0948444899859142	-3.20764925035764	0.0112168048536603	1.3482356	1.404199	1.34659187108455	1.36342203345071	1
2001-12-18	0.0755125714285715	24.6018864919198	93375800	0.761684210526316	52.0835328702841	0.18929673833646	0.457915362087452	0.19126202115555	19061162.6829519	98.863574858629	1.34438481341546e-11	1054081.24080001	0.0618145256410267	57.0310746747439	298.79008562516	88.425872368172	-0.01857	-0.0425320321333005	0.4	6.61783767859773	-0.0137093116618324	98.9469975455925	0.16359395913281	0.166765305110868	0.498134549842044	63274260	-8.44190212760546	-0.0632998653969139	0.00216980253715742	0.0336636064991716	-59.8208258509777	0.238315789473685	0.271382421457396	0.398570875947472	0.017005512477245	2.25603668368395	1851507370.50452	-0.064003553084958	-0.182131432412787	0.018736986520224	1.3383748	1.3952986	1.34615791405637	1.36012530009603	1
2001-12-19	0.079084	24.3648811641706	165865000	0.609407407407407	56.0943184069033	0.290088371862076	0.595664632567563	0.180597876427566	37336594.0452418	101.236162927632	2.01681468963651e-11	2149976.99420001	0.0577879423076932	63.3522146873718	299.200335997767	94.9077419434454	0.036497	-0.0310112477273057	0.4	3.55413015189378	0.0267177788589881	98.8966580003016	0.162092039199517	0.165830651928598	0.437213051877117	63441420	-5.84171800648145	0.357685259734527	0.0046263990972804	0.0343204530119608	-35.2068638545809	0.390592592592593	0.311119145169128	0.369420299021357	0.194516837464671	2.22750591491929	1916808709.57982	-0.145453625207574	2.84626860848193	0.0286203898411455	1.3400396	1.3815959	1.35888827603758	1.36452960916948	0
2001-12-20	0.0776126428571429	24.1448047884034	110649000	0.846557504873294	49.1889557337005	0.228757703940968	0.315336952037362	0.165551212500405	28109330.3283658	96.5639723548858	5.37141209069864e-12	-263689.200599994	0.0453552371794879	56.5541751390079	287.361140685628	91.7036316445154	-0.110774	-0.0241588347356244	0.4	-8.31516150296637	-0.0803778880662507	99.2578910565398	0.154844420799555	0.163633405702789	0.372245227322243	63682430	-6.0414098175192	-0.319191058340881	-0.00159046507424552	0.0346969183186238	-58.3187760195747	0.153442495126706	0.258560261821654	0.332466953288123	0.110746878888717	1.82244740114226	1868089779.51427	-0.192090954165341	-1.0294230181071	-0.0449351390188596	1.3358136	1.3680853	1.34709885069172	1.35707331659321	1
2001-12-21	0.0784076428571429	23.9829012701702	174732600	0.764179337231969	51.425854305108	0.193234638622212	0.380010194039724	0.151621569482923	13901314.8950915	97.8405090194958	5.35097571765629e-12	-1002323.798	0.0272048782051291	57.4424022740156	277.371083926106	93.1676803454407	-0.176726	-0.0108654540171683	0.5	40.2194763165646	-0.123481432370925	99.4068404821469	0.150567773045742	0.16102027917138	0.313540686145686	66136560	-4.95240996298694	0.347071311965916	0.00038826903323166	0.0348632615476284	-44.3545996813761	0.235820662768031	0.250980395470446	0.305304767348897	0.142331651713544	1.60870393174328	1838646749.71689	-0.165196705807253	0.550642482699375	0.0158389021238197	1.3436254	1.3582245	1.34628256712781	1.35481453175808	1
2001-12-24	0.071826	23.8325622889536	187390000	0.674311890838206	53.8145891247945	0.142406784535574	0.485652633784922	0.150145409619698	8984725.74822116	99.5200817290884	-7.15580395657901e-12	822926.097700005	0.0149239871794882	53.1586396210919	284.835473950375	98.0716251468169	-0.0909249999999999	0.00179823841809447	0.5	-3.71107734172072	-0.0643636686614755	99.3820489325271	0.150757482811454	0.158967719899395	0.267542292463818	61010810	-11.2288170454537	-2.01673741708729	-0.00296818833701441	0.0302049309294662	-31.9171282233179	0.325688109161794	0.275882966700895	0.29549750046623	0.236653899170226	1.55872806894086	1847161481.86575	-0.179702441986542	1.48875291435827	0.0169974719180112	1.353102	1.3506688	1.35342204475188	1.35715752598388	1
2001-12-26	0.0682545000000001	24.6402329681966	223990200	0.593332211853452	54.6812861956906	0.13496935126635	0.51600379426406	0.149245661943018	2035890.33310914	100.011610875411	8.59500847126521e-11	298212.896100009	0.00311516025641101	45.5326841555349	285.22404891833	100	-0.0672329999999999	0.0076785783914502	0.6	-0.969797046198404	-0.0477041500379977	99.322249187859	0.146499676441343	0.156474111207784	0.233414544010047	59483900	-12.9159150818277	-1.35679255147831	-0.00687019301872496	0.0242958816776689	20.6476804946125	0.406667788146548	0.31947790718278	0.303490969371747	0.351451782804846	1.55044682584597	1832647647.53189	-0.150248277487082	1.4077812107913	0.00606767989116197	1.359249	1.3488119	1.36095636316792	1.360587975805	1
2001-12-27	0.0640781428571429	25.3902128846365	271867400	0.325446169452884	58.4294567217721	0.192848502283524	0.680381021117373	0.147077026902955	4838320.09149885	102.344112336395	9.63393360513986e-12	1041361.75920001	-0.00449060256410161	55.5055150606413	290.604442031534	105.09522924181	-0.030095	0.00914724693222435	0.7	-4.74863942700843	-0.0210726035439039	99.0588515438429	0.147741085945855	0.154727506155399	0.217847951057704	58745120	-12.426415042761	-0.570872817762922	-0.00199627217038137	0.023706537284083	66.2301773794606	0.674553830547116	0.437836548304225	0.348272829015906	0.616963986880863	1.74301271610278	1854799993.88875	-0.132107201562172	3.28367161188722	0.0266315464940938	1.3650118	1.3525257	1.37835857544528	1.37014707111318	1
2001-12-28	0.0655315000000001	26.7521050048584	346648400	0.211209445649129	60.607237430014	0.187123132683014	0.766399393971648	0.144052601329338	3528733.32904553	103.53101326261	3.74439943434831e-11	1750920.14230001	-0.00816415384615277	64.6427216892264	293.017993285794	110.004894335209	0.0416200000000002	0.0186432840719467	0.8	64.7672530446512	0.0294071511059253	98.742034097815	0.149921387026943	0.153766282329708	0.219870530055233	59949610	-7.81566131049726	0.385117508170985	-7.85879988920276e-05	0.0240460570414891	126.518042922308	0.788790554350871	0.554821216986441	0.417122291672751	0.83021906761382	2.00558381206808	1847610403.62948	-0.109081583220059	4.30939638479444	0.0161800301476879	1.3875506	1.3616821	1.39764371696352	1.38215924000169	0
2001-12-31	0.0658885714285715	27.8512326160315	312202800	0.38725708890572	55.9593394262052	0.11890082420484	0.577425920358769	0.14263306668185	-5124030.82621241	100.944922066101	-2.21413441049076e-11	277415.47470001	-0.0114436730769221	59.056223172163	290.276118737125	106.207595442916	0.0262529999999999	0.0198169334879689	0.8	-6.17985797288574	0.0188991491649153	98.7391509888789	0.148535434178717	0.152720112699509	0.22230707891564	57872990	-10.1747111267914	-0.21018398256242	-0.00176635876285897	0.0248557268730024	99.3448584064281	0.61274291109428	0.57412844835572	0.469457677233741	0.783469990599679	1.98950041207819	1818974974.83636	-0.0769551116460658	0.88293436798974	-0.0239124274768665	1.3990762	1.3713508	1.39918847797568	1.38581719636502	1
2002-01-02	0.0666029285714286	29.2942975824968	444577000	0	63.8466047227149	0.205171838883898	0.987709423629185	0.145872539735999	29936877.8108728	106.844025563412	1.23962068137145e-11	5348803.45160001	-0.00769208333333271	70.4151332499099	292.41504979644	110.899657322956	0.147272	0.0248674012957467	0.8	2.61903697078116	0.103931465453026	98.221097103824	0.146615862318816	0.151499262623371	0.248200118160469	62227130	1.93697497273559	0.946601776197483	0.0052083245698259	0.0286157567261946	159.091745757092	1	0.716085632237147	0.55166699556821	1.04492290557502	2.46772067346346	1951349174.83636	0.0378936190549126	5.469688074056	0.0619671644789374	1.4239204	1.3885112	1.43009965198379	1.40510897884411	1
2002-01-03	0.0681845714285715	30.9519086692349	597578800	0.0510572633508669	65.1893095846712	0.212447274868577	1.00594509767035	0.158658457787376	69376777.6775558	107.836191835789	1.96402591342062e-11	7304784.52760001	0.00388684615384682	79.6630560640231	292.375495454679	109.065705252072	0.204259	0.0315148963379658	0.8	2.07908221797323	0.145354496322575	97.7752748964708	0.148045411371214	0.150808492372939	0.290342833241075	65121980	12.0272959903714	1.1568515505215	0.00701773173465482	0.0281515209186559	165.200613950247	0.948942736649133	0.793704667041142	0.63234621939252	1.11642156233839	2.90778246446859	2051268093.19636	0.00561291142865539	4.97885613130471	0.011945086549559	1.4506854	1.4049672	1.45668310132252	1.42415280087245	1
2002-01-04	0.0677253571428572	32.6256859341766	700072800	0.0738988392498303	65.7278826076671	0.176435271562365	1.02022355364364	0.162763161695493	92249242.3250604	108.356630089046	9.49111647023249e-12	1732492.00320001	0.0136434102564111	86.0342221141052	302.283583863133	114.610583897485	0.196576	0.0361619935306543	0.8	1.67944074976405	0.138792206496986	97.4534924811613	0.15222176434266	0.151091146766883	0.340185593780173	63139440	13.5931747215792	0.728627867245113	0.00897962806897759	0.0268401035092518	143.233515337063	0.92610116075017	0.837836831610818	0.700843090131953	1.11182431456855	3.25066259808735	2098245444.05897	-0.0404828614352217	3.7745824810745	0.00465451502807174	1.4714316	1.4182217	1.47675340088168	1.44101483707746	0
2002-01-07	0.0697823571428572	33.7985224687562	588926800	0.306899097332619	58.7038627828509	0.11116406991771	0.782543771441716	0.167897351985757	69049553.9601152	104.714445645106	-7.56327434185786e-13	-2450176.33699998	0.0178916730769239	79.8097129598852	300.70619577462	109.047633213104	0.121019	0.0304240290673679	0.8	1.79282793847163	0.0861387556846933	97.5518559531777	0.152727551700916	0.15141842775369	0.376409733388616	64460060	15.3284500110763	0.850721440990863	0.00867248227089737	0.0273288982940348	103.340919799567	0.693100902667381	0.789591521963006	0.730425900742304	0.907922764404409	3.19478989760873	2013773687.36699	0.0398472991099545	-0.290282719933155	-0.0339164642920687	1.4774506	1.4325006	1.47327193392112	1.44561377579065	0
2002-01-08	0.0686599285714286	34.2735262949663	476417200	0.379428870513516	56.324372718513	0.0455244795279886	0.696720160854898	0.169928541314676	39059763.2220535	103.371822570814	-1.57846716324651e-11	-3855755.58619999	0.0177808717948726	70.5462539183683	293.963153241494	105.8520831673	0.063391	0.029419532431958	0.7	2.12004628079929	0.0447737267933825	97.7728738156592	0.147431586185461	0.150621059440044	0.39561800125516	67541600	16.4550150589418	0.951934156967521	0.00696221661863108	0.0278964838218895	52.0360682715802	0.620571129486484	0.733251391137498	0.731367730874036	0.737018711664424	3.01019566845915	1958470639.07902	0.0050951149946703	-1.68141615958274	-0.0127446390501653	1.486543	1.4428096	1.46476128928075	1.44600036201053	0
2002-01-09	0.0714150714285715	32.6559175097741	394458400	0.653594313382096	49.2129571410862	0.0173521068921583	0.445806951284118	0.167607258667076	9983084.99754167	99.1845235882795	-5.65537818513692e-11	-3563599.0992	0.0221481153846161	63.8970444406986	286.304391638974	100.744535891426	0.0627499999999999	0.0141571732084197	0.6	5.22497057669677	0.0463218329726853	98.3300781705654	0.139045925709656	0.148306032693967	0.3854977572326	69514410	14.3621791235268	0.331908174291179	0.00257843756744767	0.0305681867738202	-16.6697630698555	0.346405686617904	0.6043028229643	0.68901276157079	0.43488294575132	2.48887738597463	1913269759.69808	0.234843258470382	-5.68506466447108	-0.0433870328395568	1.4654126	1.4446665	1.43859752618717	1.43514029619043	0
2002-01-10	0.0721625714285715	30.8314353962407	281274000	0.726031686392385	46.4498079178098	0.0926386762767878	0.350112505908058	0.171321263645668	17188202.4977469	97.3830774375482	-6.58062011902701e-11	-4040937.75259999	0.0229320961538468	55.7398270606644	277.677119266912	96.1939280889749	0.0147270000000002	-0.00535330846544084	0.5	-15.1823403686882	0.0108927504166145	98.935975129079	0.122587239116606	0.143162273978495	0.349956127987272	72605190	15.3123821269959	0.445580761838322	-0.000881093030847927	0.0300806176098353	-107.583291376616	0.273968313607615	0.494191319845405	0.624072280995662	0.234429397544892	1.9007718481028	1983426591.70622	0.190949588583799	-6.10351306173765	-0.0195901804322511	1.435318	1.4430017	1.41219068412478	1.42136515142854	0
2002-01-11	0.073889	28.6420494069677	194073600	0.771138612311353	45.2765734985912	0.0833254698378981	0.308769820654214	0.173021313736897	11736927.0966303	96.654986598584	2.78352389381242e-11	-2024426.33959998	0.0246027051282056	61.3477342966539	269.463353842583	93.8475742472918	-0.019849	-0.0249452447560827	0.4	6.6209367354072	-0.0146190138819593	99.4802160580883	0.0998094514922516	0.134491709481246	0.297232744327514	74559450	13.5766138933648	0.45695615170473	0.0016519327388206	0.0275635504577482	-90.6317894832365	0.228861387688647	0.405748009126486	0.551297523705937	0.114648979967584	1.35182647889149	1959515423.09799	0.282739578536794	-5.13030647636529	-0.00851429238056267	1.4015096	1.4364706	1.39074445608318	1.40799912389608	1
2002-01-14	0.0721756428571429	26.6090481312142	298072600	0.74607833928236	46.0912540585901	0.0819094411805335	0.33271672061121	0.172083415620174	8439866.51466179	97.0807146547933	-1.97132873393011e-12	-169539.506499997	0.0292162692307698	54.3904754981245	268.183589595953	96.5753580958983	-0.0217700000000001	-0.0356579963669026	0.4	10.8433052792655	-0.0159474203212132	99.8592233798397	0.0841032629159246	0.124414020168182	0.238270981405031	77286370	13.5124705022477	0.484192802753171	0.000850898392593637	0.0272770616292806	-93.3881604820884	0.25392166071764	0.355139226323537	0.48591142457847	0.0935948298136715	0.941271341778283	1959515423.09799	0.115270226575239	-2.82562265578374	0.00473927345190811	1.3790988	1.4282747	1.37858130405546	1.39822746500588	1
2002-01-15	0.0721911428571429	25.1250143794277	370652800	0.608244880706368	50.4596933048207	0.122440128723544	0.462894335547743	0.162684311937917	20715317.193013	99.3067009002358	1.07497631585474e-11	1610981.25020001	0.0299017884615393	56.4836987440176	265.688972144715	93.1330190184205	-0.0236909999999999	-0.0435475586151456	0.5	7.07402977558151	-0.0169066355809665	99.9267622874873	0.0734963965377766	0.114230495442101	0.187757492032392	78541820	10.5810480136342	1.74645013298473	0.00148389502055456	0.0277823616725331	-61.3632950462776	0.391755119293632	0.367344523980236	0.446389124379059	0.209255323182589	0.809288451918611	2016259002.56141	0.0386806405380999	0.626025502096185	0.0256723312343405	1.3674452	1.4269941	1.38221153603697	1.39663556227754	0
2002-01-16	0.0719091428571429	23.7459549342939	228929400	0.838804871939383	44.0320734417155	0.0809666350790523	0.192927605390304	0.159082356521187	8822612.11964035	95.0616235213546	-1.42416848593811e-11	-2896363.4336	0.0254319615384626	49.8388590806998	256.11613135738	88.1255091565387	-0.105651	-0.0402228468282692	0.4	-6.10301167446843	-0.0764083236578686	100.346312463574	0.0591739814194863	0.103219192637578	0.129459553285693	83456590	14.0610153528765	1.35382356580433	-0.0019791625313858	0.0300903775428541	-108.198160569356	0.161195128060617	0.298628058673696	0.397135435810605	0.101613304399879	0.3591240384754	1961750002.56141	-0.051331963983967	-2.25778359357719	-0.0433216579292142	1.3563038	1.4108582	1.36499535735798	1.38462236913617	1
2002-01-17	0.0774398571428572	23.0101440083423	394073400	0.412772402780387	55.3500749496031	0.0995102487029964	0.665197556255019	0.153810059565867	21363541.4233911	102.493963575671	3.15537231174006e-11	4813818.03070001	0.0286745641025652	53.8487611190948	247.194630544592	94.8923260293732	0.0371380000000001	-0.0229563023441613	0.4	7.94803188701624	0.0261394186567868	99.970916395155	0.0580699828487565	0.0941893506798136	0.098201676126175	88773300	18.0017000326002	1.23817842112067	0.00193657996461567	0.036937934218258	16.1668569056755	0.587227597219613	0.394827904855669	0.396366258825626	0.391751196915754	0.626309548839532	2028184433.72823	-0.0624691298910045	5.05491163717993	0.0786353148377889	1.3723116	1.4038148	1.38980223823865	1.39458484747505	0
2002-01-18	0.0753990714285715	22.326891005673	309370600	0.490458075020352	53.236007125138	0.0460139882602088	0.558820129305329	0.151013205484084	16950000.0648682	100.954029219745	2.74172990739361e-13	8147576.97740001	0.021684480769232	48.4605697526831	251.0565503012	96.8122680826483	-0.0723549999999999	-0.0053564168034343	0.3	-39.8809989468929	-0.0497133260593808	99.8191783716233	0.0569524457065447	0.0867419696851598	0.0796913432565383	89383980	14.6908867072286	0.124584816943784	-0.000213509742959972	0.0369128844940242	9.05366085418554	0.509541924979648	0.433065911563662	0.408599476404971	0.481998781881043	0.713990781115581	1999066977.70723	-0.111112955236056	2.8531992935742	-0.0138855802372302	1.3866546	1.3940821	1.39972382549244	1.39912705702504	0
2002-01-22	0.0739705714285715	21.5414910657469	227542000	0.578170987538355	50.8733623373517	0.0270896816912777	0.434449446007516	0.144454935409498	-7150109.73780441	99.1007662818672	-5.10131412489018e-12	-1757563.31589999	0.0114805833333342	46.9911114702569	252.650378241606	96.5060024590051	-0.112694	0.00578253925432524	0.3	54.3437884378827	-0.0775715662440348	99.84855788585	0.0566104114214259	0.080715658032413	0.0639172121223552	90714610	11.6866530229968	0.865245547785737	0.000346603281509142	0.0365883189384095	-10.4123913702964	0.421829012461645	0.429320278529656	0.415506410446533	0.456948014695903	0.646495839039218	1917238377.70723	-0.210893926094844	0.630303673436216	-0.015913153635095	1.3952348	1.3871668	1.39886788366162	1.39876868302049	1
2002-01-23	0.0745317142857143	21.4166897340128	338361800	0.277443797357379	57.7900976044219	0.100135785275191	0.798276018644551	0.140030233495996	14910155.8035231	104.073438916598	6.38931979213093e-12	3340600.10900001	0.00293076923077007	46.1656826388919	268.734553282543	106.327988054275	-0.0429009999999999	0.0158248586010306	0.4	-31.8176314793801	-0.0286897783987318	99.4031978197686	0.0652097643890084	0.0776144793037321	0.0706123104361023	93051420	11.4714361780284	-0.177727301756917	-0.000291405226402514	0.0354546594421269	34.4064885239597	0.722556202642621	0.527065586567311	0.452692802486792	0.675811154728349	1.02278483083862	2025002289.97032	-0.0212529557184046	4.66015642057721	0.0535363028733747	1.412139	1.3897921	1.42390958910775	1.41244583156222	1
2002-01-24	0.072644	21.748746269186	424362400	0.229832018285428	58.7796130409783	0.092665789544113	0.824003427133313	0.140959879608687	22944042.3789451	104.495375797774	3.14960031209084e-11	4780629.13580001	-0.00236003205128132	43.5285819222975	283.083509688326	109.326404669198	0.019849	0.0301242743847605	0.5	-18.0046012269941	0.0134459074698144	99.0175178019953	0.0729505517437001	0.0766816937917257	0.0933615221341055	96718580	9.21802624743877	-0.576095413055757	-0.000560235362080869	0.0353683194296999	101.691917532409	0.770167981714572	0.608099718283065	0.504495107752217	0.815308939344762	1.37116021421537	2026411553.45145	-0.191661088175482	4.33019030513332	0.00821922157647748	1.443258	1.3997809	1.44465905940517	1.42584804400545	1
2002-01-25	0.0716236428571429	21.6639759673388	470841000	0.219804778007389	58.997619316182	0.112870933696013	0.808684937418378	0.142877841210112	31046147.5133464	104.26243581778	-1.41103468262811e-11	582637.736100006	-0.00542203205128122	37.5957201205416	303.932911203892	110.451295839603	0.04098	0.0278047465905752	0.6	-13.3177616375042	0.0279129705208295	98.7394238352598	0.0783720477634158	0.0770197645860637	0.124653480896852	97212500	4.01177065479939	-0.790812268671669	-0.000770339353789173	0.0353436172685434	98.3554732727453	0.780195221992611	0.665464886186247	0.55815170056356	0.880091257431621	1.63942941609485	2052096960.37037	-0.22779729045528	2.61125489804142	0.00172242400084971	1.4531188	1.4127152	1.45934603960344	1.43727930873173	1
2002-01-28	0.0694807857142857	21.7216774123775	517452600	0.0906523798516021	59.1139642460093	0.109347212298708	0.788652590139666	0.146054815954751	35666518.5295689	104.072060332739	8.44170082125479e-12	89370.5106000056	-0.002343634615384	43.2078343832826	322.790616924779	110.02359230721	0.10373	0.0274504169627517	0.7	7.22201774954738	0.0721594329669193	98.5515552478525	0.0804704287046913	0.0777098974097892	0.158925117534214	97149220	-0.388384952372832	-0.868995215165203	0.00167305691599655	0.0340779804998436	107.211155516114	0.909347620148398	0.746759130840297	0.621020843989139	0.998235704542614	1.83523832024566	2067259921.56862	-0.248439826101054	2.10615065065824	0.000859429606533013	1.4672054	1.42693	1.4695640264023	1.44686488896233	0
2002-01-29	0.069991	21.7872670316277	457371600	0.151641898911423	57.3604659210878	0.102619780044231	0.711532697188304	0.149364619846332	28555974.2063055	103.030212358946	4.73081942710661e-12	-354837.178499992	0.00390353205128258	44.9944463403313	331.797455773328	106.313405379885	0.117818	0.029658042417638	0.6	6.1669496895197	0.0831185126503253	98.5136726017284	0.0861015495735611	0.0793882278425436	0.188819256318662	96414220	-2.74540992797084	-0.627344899545729	0.00196375765311462	0.0339634393257199	98.8447284056447	0.848358101088577	0.780625454256391	0.67422238074489	0.993431601279393	1.89485676792085	2045490524.6202	-0.19186773731554	0.566739383167645	-0.0086311007488451	1.4832132	1.439224	1.4721076842682	1.45237945460554	1
2002-01-30	0.0676951428571429	22.3846302747114	575265600	0.0139150217568304	63.3344600296899	0.166316103086399	0.96830671536576	0.157047396130194	53843928.705019	107.061911563041	1.24300345861537e-11	3465218.9145	0.0117021602564109	53.0448847743259	351.768538355696	115.928821108057	0.194654	0.0283171571841255	0.6	1.85656536490291	0.134896152401509	98.1389574362931	0.0946980457602102	0.082450191426077	0.230320527811934	100586640	0.946371444621478	0.363569233688033	0.00815462413280551	0.0331322542200308	121.178346168103	0.98608497824317	0.849111962251984	0.732518907913921	1.08229807092811	2.27695429503141	2153558534.58345	-0.0435654816465681	3.30927741608815	0.043263347370621	1.4969158	1.4545274	1.49557378951213	1.46876609922271	1
2002-01-31	0.0639375	23.437720955045	692377000	0.00261907640010704	66.4600909722008	0.158048565347966	1.05615394881086	0.175267966710377	88711094.4925261	109.516186492986	2.20071675259625e-11	6211965.89930001	0.0215899807692315	61.8319197460347	380.586095883055	109.964388335269	0.22859	0.0240709137497624	0.7	1.49471019582984	0.155972373124711	97.6765443797649	0.103963119163271	0.0867527769735158	0.285597696767925	99823500	3.59496478652839	0.0341072714699706	0.0114082769778627	0.0324477723596811	158.204088344487	0.997380923599893	0.898534949367954	0.787857588398599	1.11988967130666	2.76295008368854	2266888394.09662	-0.0928640208925633	4.73834685573319	0.0258154941751105	1.5162532	1.4797556	1.52466419300809	1.48950771754586	0
2002-02-01	0.0607742857142858	24.6445993180147	592800600	0.134670693372732	63.5876534052778	0.0712946832950222	0.925092361623436	0.189895789883497	74899660.23141	107.94438149783	8.32649595687328e-12	1373832.40050001	0.0285389679487185	62.5913624872572	395.987683259997	110.103714724279	0.173524	0.0254683469831405	0.6	1.54997246206872	0.117680673391119	97.4931506207616	0.110348340766096	0.0914718897320319	0.33921589264112	97152230	4.02558410757388	0.132716270662449	0.0111181391418286	0.0326567561417154	137.350737412006	0.865329306627268	0.887466401787725	0.821060526194974	1.02027815297323	2.9975266569652	2189796842.58146	-0.126537200442255	2.5558541520354	-0.0126193684992513	1.5311084	1.4921136	1.53744146200539	1.50286922344661	1
2002-02-04	0.064958	26.1418817403739	723394000	0.03739011285083	68.0912786739991	0.095633201216563	1.07087533051312	0.207973265277839	90331759.0950341	111.691236110072	5.80906198935014e-12	2941897.09450001	0.0434179807692308	70.8868619311485	417.425392255063	116.177792601542	0.292622	0.0290612317006367	0.7	1.44392141397483	0.198788107546679	97.0812457278177	0.11801554532255	0.0967806208501355	0.402361125731576	98557200	6.88296032924715	0.227707395867068	0.0135294401572782	0.0333885348780248	144.797110025565	0.96260988714917	0.91251423024154	0.851545094210496	1.03445250230363	3.46122810885459	2286752254.83779	0.0336239238424241	4.96170433724365	0.0377857762263454	1.5577454	1.5124754	1.56602264133693	1.52474481918359	1
2002-02-05	0.0667281428571429	27.8611387173676	837615800	0.106077078698281	68.5371025783272	0.127985487016227	1.00402055013767	0.233276144449693	82841371.9880137	111.505432269086	2.65181295295644e-11	4295824.16900001	0.0509416089743588	72.0905328509187	423.128389087191	110.556020279608	0.190172	0.0330591906431341	0.8	1.49506229109693	0.124089746360638	96.8038462345615	0.123812349528508	0.10218696658581	0.466942893460476	98710990	7.59699678320401	0.453450014812827	0.0119537265816227	0.0332748460706547	151.653112488143	0.893922921301719	0.9063171272616	0.869802438560864	0.979346504663071	3.80841586310172	2266445169.94707	0.108327187736196	3.81398371152374	0.00393695365174773	1.588224	1.5357186	1.58721109422462	1.54380721569566	0
2002-02-06	0.0704285	27.8814465137627	688221800	0.310490601098336	61.3381527630774	0.121069087910621	0.816287947745094	0.246637136785389	53184203.0811796	107.602399093375	-2.40128811933546e-11	-3364985.87529999	0.0587648205128204	70.438577199798	410.722068657953	106.290448256511	0.160077	0.0309390220271148	0.7	1.44332853431938	0.106847609660385	96.9202596283742	0.127931861103238	0.107335945489296	0.513347696420241	100555210	10.6855666839008	0.0527098405720885	0.0127929010608501	0.0319192509865684	95.5764946968288	0.689509398901665	0.834047884474955	0.857884253865561	0.786375145693742	3.76979685223406	2201953190.26624	0.152205146101268	-0.45059409097844	-0.0311277169374829	1.5956516	1.5462837	1.58468872948308	1.55032299466009	0
2002-02-07	0.0675002142857143	27.8465987679426	601263600	0.389106233305128	58.2143982028266	0.115740908591578	0.722863130135464	0.250588318041539	20435277.5835295	105.379533796313	-2.42569758746155e-11	-4760773.80519999	0.0660872820512823	62.2906823701547	389.577977510872	104.516094362943	0.158796	0.0232726707930027	0.6	2.09494531200607	0.107648835051199	97.1839912261381	0.123016333326066	0.11047202305665	0.537674711148117	100805180	8.21610135680124	-0.641390277141596	0.00587804061491185	0.0256972259897185	59.201911865873	0.610893766694872	0.759663178548261	0.825143895426461	0.62870174479186	3.57163396795031	2146615422.17683	0.258595444482759	-2.08195540060481	-0.0151119282442815	1.590273	1.5532631	1.57510981965539	1.55134645017644	0
2002-02-08	0.0707144285714286	26.7246791059674	512430800	0.446471886250892	55.9743221337237	0.0836885091091123	0.656717421201056	0.23749421669576	6182704.90471601	103.579814112732	-4.75608017871774e-11	-1797977.56039999	0.0696787628205133	61.809360970984	367.371574079514	103.266040268456	0.0646709999999999	0.0171243768002484	0.5	2.05338621346739	0.0429394626604263	97.5192755207845	0.115769999993292	0.111531618443978	0.540708163387427	99587600	6.31150609793995	0.0476072922045709	0.0060693790175513	0.0255490637937998	11.8287501508549	0.553528113749108	0.690951490281877	0.7804130937116	0.512028283422431	3.28549799114806	2150113347.10132	0.32585841816777	-2.71911708594361	-0.0111730695173977	1.5854066	1.5582575	1.56296121310359	1.54904055014436	1
2002-02-11	0.0743368571428572	25.9786646210697	612081400	0.244626947389378	61.5767588228337	0.143242173018601	0.810117509458314	0.227285746631747	27420798.9105911	106.770358416211	1.71987925812789e-11	2262952.45050001	0.0756755384615388	68.0581456560161	354.842452379968	108.279069452577	0.113335	0.00725098410912616	0.5	1.53489500181316	0.0734924376802594	97.4884157439883	0.113218384609192	0.111868971677021	0.544005374858414	100210110	5.58717338626716	0.197043251961365	0.0100208687121924	0.026178907603896	42.3957204864652	0.755373052610622	0.712425344391459	0.757750510604886	0.621775011964603	3.33834200692542	2246601701.39465	0.360218965656372	0.739325122295333	0.0387721965963106	1.5806682	1.5692068	1.57513847540239	1.55821372284538	0
2002-02-12	0.0699490714285715	25.3637680337147	556011400	0.401565492106354	59.2683511380119	0.143351025874123	0.737370946380221	0.214182319631525	31905553.5537658	104.818863413874	2.163394556804e-11	2546154.09370001	0.0809539935897439	66.9422094947428	335.909407669976	102.573669081352	0.093485	-0.00542021736877841	0.5	2.1070449700538	0.0609027534060747	97.6010255520094	0.11342435502387	0.112180048346391	0.540756464446157	97813660	1.41828471389825	-0.681304548573607	0.00532060332987117	0.0232233694999861	52.2503360568222	0.598434507893646	0.674428398892188	0.72997647336732	0.563332249941924	3.25020228492952	2239949193.20804	0.282564836653432	0.081007461246788	-0.010867260273335	1.5711916	1.5797078	1.5774939836016	1.56257577323713	1
2002-02-13	0.069847	24.9914714604315	634229400	0.316809184691005	61.0170501751481	0.122802203109585	0.773474508984392	0.204466449650287	35272351.2031701	105.351817654926	6.50075898770096e-12	266575.701000002	0.0850421474358978	66.8969296477352	308.574062075723	101.173140768679	0.111414	-0.00638064680577873	0.5	2.04478827361564	0.0721108690112578	97.6250350493189	0.116520481560495	0.113048134989212	0.536466695452109	98095550	-0.121178931419108	-0.0948544728810887	0.00559828616564612	0.0232842925667973	66.9051177343149	0.683190815308995	0.677349204364457	0.712434050366366	0.607179512360639	3.24124033974735	2257185995.66634	0.0877844339999652	1.59782231258319	0.0120675452117161	1.5755456	1.5855986	1.58546732240106	1.5696372690122	0
2002-02-14	0.0703061428571429	24.2462439431648	569186800	0.440685659839731	57.390722107833	0.140068862661045	0.67211762782611	0.175753334467985	24872170.9570427	102.797705882547	-6.50194437184222e-12	-102504.386599997	0.0883052179487185	65.7804399110789	291.425898190877	100.778376912033	0.0979669999999999	-0.0034460825195782	0.4	2.62914497832894	0.0642131049224976	97.8221418905951	0.122087521440457	0.114856012279461	0.523248682680744	94261510	-2.5307926570207	0.336050448232218	0.00430422038706399	0.0240083632500381	39.3743743643867	0.559314340160269	0.638004249629728	0.687624116787486	0.53876451531421	3.06144830487198	2225812052.52966	0.125895429775914	-0.0202900911785246	-0.0165288648376053	1.5793876	1.5848303	1.58203221493404	1.57064176555544	0
2002-02-15	0.0718367857142858	22.804850956355	504140000	0.671241050119332	51.7370447558391	0.0774945300162413	0.481249730396893	0.165409242425457	1571155.29080391	99.5771092895442	-2.81424427104795e-11	-2311513.00239999	0.0817502307692313	61.466361288216	263.363946910601	94.2800728197956	-0.0121659999999999	-0.00243509189320094	0.4	5.01152165276122	-0.007918433640278	98.2435218924555	0.125847173637345	0.117054244551038	0.492571098136874	89256650	-4.48076131436341	0.333257573626952	0.00221027146774841	0.0255601390123786	-37.0707963784428	0.328758949880668	0.534922483046708	0.636723572207227	0.33132030472567	2.65613566729415	2166522476.57972	0.224309561671998	-2.60136595102007	-0.0288681911921546	1.5777228	1.5815647	1.5648014766227	1.56331417181808	0
2002-02-19	0.0754082142857143	22.4507634871928	406575400	0.95741690974514	43.3311337905418	0.0498022258105576	0.128087683077121	0.156021317951954	-30625529.582051	94.1558226273271	-8.04981603470929e-11	-5455961.14279999	0.0671216217948725	59.8969283430355	239.301204283865	88.8801341197898	-0.134465	-0.0107166383564914	0.3	-13.4084507042253	-0.0887781702804786	99.0344315791584	0.123899544896011	0.118423304620032	0.431668929533413	89899740	-2.96691781564463	0.484821070916279	-0.00100135469116444	0.0295374497310965	-226.789636873003	0.0425830902548599	0.370809352116092	0.548085498843515	0.0162570586612452	1.88569032166748	2088611120.74304	0.178273064557436	-6.92636195332251	-0.0550442424650901	1.5475002	1.5640842	1.52599431774846	1.54241704966934	1
2002-02-20	0.0736224285714286	22.3121919921983	477936200	0.77524980535957	47.0243535759915	0.129217597381938	0.231688497916649	0.143387986564067	-24728895.1819973	96.0169307251768	-2.75183800630039e-11	-2833018.16559999	0.0551691602564106	53.4140359055179	236.176369779369	93.757580822008	-0.08196	-0.0143803333851895	0.3	-4.26704876627162	-0.0538626493647058	99.4670831612558	0.124121195288626	0.119562882753751	0.363162875378009	89376350	-4.17574684407284	-0.502037216691868	-0.00254894612562882	0.0274823609193331	-204.942644743803	0.22475019464043	0.322122966290871	0.472764654659301	0.0208395895540123	1.42783356326159	2148218321.90258	0.13548509023478	-3.60492125811291	0.0222961524165215	1.5272664	1.549229	1.51100821183231	1.53125685882037	0
2002-02-21	0.0783672857142858	22.8791721137595	366248400	0.988101426096228	38.4087098981348	0.0104747834576395	-0.19721596867153	0.151148994799429	-50559143.5076747	89.5329949136239	-2.69896092321631e-11	-4663248.70059999	0.0337639487179493	45.1129456323917	231.535359486687	88.4774080434358	-0.246519	-0.0314469889297604	0.3	-0.913889865887785	-0.164725634438135	100.399250935901	0.113588334112577	0.118367973025516	0.267985899965306	89419750	-1.3565237333549	-0.0474181395731428	-0.00945055617351796	0.0315515048870334	-202.607625866611	0.0118985739037718	0.218714835495171	0.388081381604591	-0.120018256723668	0.502764124051924	2043735340.33205	0.0453002001381704	-8.35462295675651	-0.0730772088470839	1.4823168	1.5289312	1.46622747455487	1.50314942994394	1
2002-02-22	0.0826020000000001	23.4751937366317	467867400	0.710286762853956	46.447057722882	0.0496163056833432	0.175753939252136	0.160718773226295	-35584237.3595071	94.7894924346696	-9.35031370117817e-12	-1794255.16199999	0.0167423846153851	44.8078793968565	229.968036636897	94.6317064674289	-0.173524	-0.0414434803165874	0.4	-2.66871621342797	-0.112590317280684	100.636057558112	0.114504693026994	0.117595317025812	0.181248588107352	90200670	-0.0905008467143684	0.0203053368117807	-0.00443525630998509	0.0362528499965583	-130.87095674325	0.289713237146044	0.242380969378796	0.339514577529326	0.0481137530777355	0.187250469907152	2115920033.7627	0.0761670291150225	-1.48025722265931	0.0560722708091985	1.4584972	1.5189424	1.46283964970325	1.4945884426814	1
2002-02-25	0.0879080714285715	21.8293283029579	574579600	0.486185206870271	52.2395326943278	0.0473328172030363	0.4455909863787	0.157618514743298	-18889234.1358061	99.1339724230957	1.35873702430463e-10	7689759.16030002	0.0046913910256412	43.4848487136016	221.398039889588	95.3162658417386	-0.055067	-0.0413005269995839	0.5	-3.01336222462983	-0.0354825106615472	100.400299440665	0.112247485871072	0.116525750794864	0.120984651916989	93212350	1.3230676699926	-0.201953188537146	-0.00382491146764858	0.0370936398779989	-30.7502574546841	0.513814793129729	0.332858910629107	0.33729602189592	0.323984688095482	0.301581193549905	2140337022.84267	0.236922073392788	3.74726822298985	0.0459800896816542	1.4573446	1.5175337	1.48341876646883	1.50004090764842	0
2002-02-26	0.0890305714285715	20.3010246859751	509546800	0.515505866421564	51.455336378395	0.030179986719938	0.398692231689305	0.154420634786296	-14940535.7743704	98.4690999487552	2.49984623144012e-11	3364109.46970001	-0.0016008461538457	40.878120908789	210.857532769043	95.7911901428702	-0.0403389999999999	-0.0260774608931559	0.4	-2.50641981245492	-0.0262675993647375	100.271782945176	0.111001217727143	0.11542084418132	0.0778796827608286	94133410	-1.23361975604016	-0.563250414169278	-0.00452665270369442	0.0370282182561283	-9.7532299790683	0.484494133578436	0.38340398494555	0.352665342912463	0.444881269011724	0.339962815062078	2124078822.84267	0.167484574482819	3.30982593711484	-0.0058970169474718	1.4707912	1.5091457	1.49415017764589	1.50287219716689	0
2002-02-27	0.0965816428571429	20.7176616438633	252007000	0.751683685293998	42.9701469216572	-0.00972376449758204	-0.0252650334238246	0.16252269674492	-42132183.8245227	91.5667750374849	-6.80585374745959e-11	-14390879.6703	-0.0121289871794867	38.237382578167	190.79903037519	87.8049024174885	-0.132544	-0.0245425220908236	0.4	-1.59368043834544	-0.0900803691810361	100.812799735565	0.103152200978901	0.112967115540836	0.0212206136153359	104006350	12.1678702653364	0.544587160017254	-0.00749773403540099	0.0407655503247014	-100.616187697748	0.248316314706002	0.338374761532368	0.347901815785765	0.319320653025573	-0.216651329324735	2025263859.54714	0.622784828835804	-3.69124651429969	-0.0749858393336963	1.455808	1.4915372	1.46480678509726	1.48528088859109	0
2002-02-28	0.0967346428571429	21.1045388190453	137772600	0.804080878636733	41.8403843499201	-0.0857425460711917	-0.0152975752747553	0.180154880451374	-63648605.2009139	90.9357691914009	-3.31227118976422e-11	-15050289.8063	-0.029335198717948	37.8034723154999	174.275873884395	88.2113712748276	-0.210021	-0.00821040378526768	0.3	-1.6654205010225	-0.140762885166361	101.309235092979	0.0887158009036011	0.108116852613389	-0.0441303648292757	103823370	11.1343745037753	0.272824934355238	-0.00727211662207417	0.0407295699276586	-116.387506581606	0.195919121363267	0.290889548142667	0.328897726571399	0.214873191285204	-0.744281124438118	1975516932.87362	0.676092220589815	-3.8262622235512	-0.0119103193890144	1.4583692	1.470343	1.43969519006484	1.46786109066544	1
2002-03-01	0.0988265	20.6089923459238	225020600	0.413511375083218	51.1500565566423	-0.102274876505824	0.410997339947233	0.183301400524436	-42564385.6799836	98.5314798361592	4.99809737759031e-11	3937356.5504	-0.0371174102564098	44.215433044595	167.579150512741	98.1171504371577	-0.0806790000000002	0.00305438997518056	0.4	-13.7319994104207	-0.0523375194482661	100.981883073893	0.0830736623725548	0.103108214565222	-0.0835266634411358	102330200	8.28709359891887	-0.0180013129837135	-0.000718123436939396	0.0469688864521545	-40.8468716294449	0.586488624916782	0.389422573734039	0.349072675625612	0.470122369950892	-0.546375175362923	2057572222.74029	0.725320260045901	2.45393917145774	0.0775581054447601	1.4674616	1.4629794	1.46030546004323	1.47398198327172	1
2002-03-04	0.101683642857143	19.1522596040886	312085200	0.226037734533756	54.8832241330323	-0.0358417866594726	0.613332327116217	0.181308150679329	-12543429.5614228	102.086702927197	9.8441502057093e-11	7229671.98380001	-0.0436190128205118	43.5623729361392	167.916026656458	107.382869136553	-0.0461019999999999	0.00551842599181538	0.5	-10.6964687984553	-0.0292108203767434	100.406568023679	0.0818058421900505	0.0988477400901878	-0.0914649311645643	101704610	5.91079681670874	-0.135019695862294	-0.000983320281630269	0.0467340279427363	33.0200214224642	0.773962265466244	0.517602470978107	0.405249274076444	0.742308864781434	-0.0967142634950346	2116891343.90337	0.701197051129529	4.93951163998907	0.0351942442832388	1.4736086	1.4654766	1.49197430669548	1.4887692590405	0
2002-03-05	0.103928571428571	17.799579200956	243409600	0.395658402434307	51.0797096099346	-0.112161558894019	0.449126989734468	0.17591575281383	-13502940.8052027	99.2721983841538	2.47707402265144e-11	670413.58860001	-0.0500180512820503	38.8608265810905	162.896215064459	101.729330009534	-0.068514	0.000348005551784071	0.5	-5.57707033573836	-0.0444708084122701	100.263297686342	0.0767937004831236	0.094436932168775	-0.0912012782783411	98608720	2.51561255116476	0.202793058611377	-0.00244621128362743	0.0473812982391393	39.9492019709051	0.604341597565694	0.546515513173969	0.452338020442286	0.734870498637337	-0.0049019547799678	2065550099.72292	0.470547840389411	1.86143945744135	-0.031788852873132	1.4718156	1.4713034	1.49686553779699	1.49201993921495	1
2002-03-06	0.108112214285714	17.0412051618317	299961200	0.27513863763903	53.5432434812455	-0.086706933882658	0.607967910677616	0.162760368468656	-2568031.67864895	101.846943747493	-4.27341186986753e-11	-693322.362599993	-0.0510811602564092	33.36116487267	166.290885530664	111.953444045251	0.010885	0.0143539996287805	0.5	-7.59098607264543	0.00708762182583383	99.9529727675466	0.0758118773690373	0.0907119212088275	-0.0772923959430627	95725210	-1.30863328554213	-0.324346304384861	-0.00167414208342038	0.0477240972253637	46.1875528607428	0.72486136236097	0.605964129569636	0.503546723484736	0.810798941739437	0.251143255506392	2100444380.8596	0.499205086593604	3.89927174389452	0.0226902390459494	1.4988366	1.4773223	1.51165202519799	1.50096631390314	1
2002-03-07	0.108469357142857	16.1679701136707	364523600	0.169236379549267	54.9459325135737	-0.031699057005476	0.707663406607369	0.156289942140126	14154392.9073563	103.221998228978	2.92923312330396e-11	1618474.15660001	-0.044916064102563	38.4219544642381	170.511685050339	107.211976946068	0.112695	0.0243901929952147	0.6	-98.0753609004169	0.0749289960296207	99.6135411200519	0.0714085791098806	0.0868512527890381	-0.0508912421834262	91483630	-3.7743197869968	-0.00741024184839389	0.000416742067642274	0.0476708403098061	91.896735753913	0.830763620450733	0.680897293196669	0.56266358005538	0.917364719479245	0.552906353991167	2143954294.21748	0.269798866759066	3.43658899613897	0.0127971317386967	1.5331572	1.4957632	1.528126350132	1.51189516592075	1
2002-03-08	0.106734642857143	15.2234121212283	431967200	0.111099857480811	56.2313139999989	-0.00477080043186492	0.780508356745444	0.157187551980755	18093737.0723004	104.327932660709	3.56180682006893e-11	1245346.2504	-0.038155878205127	43.6482544602364	177.405364174229	103.569908243401	0.0979669999999999	0.0262134322442637	0.6	7.13843478853793	0.0640517923180718	99.2719232444114	0.0656200730245051	0.0826050168361315	-0.0140592508722337	90507900	-5.50336021373652	0.0361846822318306	0.00326959061161051	0.047000460020543	135.066740603794	0.888900142519189	0.750231576304175	0.625186245471645	1.00032223796924	0.875551075758652	2137979519.60868	0.106985943169355	2.4795482081851	0.0114189487049727	1.5486526	1.5080571	1.54508523342133	1.5240965902988	1
2002-03-11	0.104948857142857	14.1829376519311	497663600	0.0206231705688516	58.0717392055914	0.0243174689229577	0.867393697037263	0.161708756815112	33649474.7220514	105.789741787194	-9.40203382529339e-12	1445905.37700001	-0.0199973910256399	49.8446298015209	189.697993982798	105.872409381551	0.22795	0.0272390343259177	0.6	2.67315743882192	0.153219841576911	98.8944726873864	0.0637739135610818	0.0788387961811216	0.0329880409457139	89351080	-7.03216886452364	-0.395470593238933	0.00825371354755773	0.0441224607309844	115.823723491176	0.979376829431148	0.8266133273465	0.692328606096597	1.09518276984631	1.24958103961554	2193569189.32397	-0.0987662937120072	2.99337421890029	0.0160908404117556	1.5585134	1.516061	1.56492882228089	1.53873648297174	0
2002-03-12	0.105330428571429	13.2167827875836	434149800	0.0991998325314815	55.9193567540095	0.00371838268736742	0.779277481711048	0.1614953720939	52499143.2622221	104.411714795913	-8.47180670972287e-12	149961.47670001	-0.0101957307692297	49.9684545917168	215.698592885049	112.568272978124	0.126781	0.0323866619967271	0.6	3.68234220858786	0.0834869559018425	98.7580485261194	0.0557651509794601	0.0742240671407893	0.0778007975166695	87544240	-8.4340135819552	-0.116491493849139	0.00567412059302864	0.0442779851534275	84.8589751042976	0.900800167468519	0.851342274053839	0.745333162082344	1.06336049799683	1.41226293553867	2253112161.12254	-0.148865616634347	1.29762830689462	-0.0136606148658703	1.5737528	1.5227842	1.57090088152059	1.54675621334052	0
2002-03-13	0.100993714285714	12.3839371356024	383958400	0.152353040961212	54.449189908005	0.0067217534989283	0.725062486925005	0.15951449007679	55057636.1302714	103.488337253671	7.386723621975e-12	-1060963.8438	-0.00444935256410184	56.266173154675	241.172006302995	112.857114069229	0.0435409999999998	0.0254237234469549	0.6	2.04375732184342	0.0281591796646679	98.7598704656518	0.0467470624425785	0.0687286662011471	0.11449737576632	87250310	-10.8748135045843	-0.799863781701472	0.0100431782975666	0.03887460711087	80.2786738476199	0.847646959038788	0.850110502382156	0.780258942182281	0.989813622781904	1.44615698271697	2251678694.73854	-0.375491906585421	-0.298552000544317	-0.00934768655552043	1.5791314	1.538984	1.56997325434706	1.55064017455133	0
2002-03-14	0.0973202142857143	11.7234224002758	329634200	0.166216113791971	54.0500590240709	0.0136626687100028	0.726926800102102	0.153548709970923	58847431.1575811	103.361512088232	-1.77413591088316e-11	-473913.999999997	0.00211794230769313	50.1422558305423	267.938837663392	104.179148413015	0.0486639999999998	0.0147535865623142	0.6	2.81120519739792	0.0316037588288299	98.8037495094906	0.0419690576393033	0.0633767444887783	0.142538576703055	86055620	-12.3871148424568	-0.62626072568554	0.0057486388008774	0.0364535655924306	55.4350529103715	0.833783886208029	0.84466829699078	0.801728727118448	0.930547436735445	1.43585827301087	2280700984.20022	-0.380487959204388	-0.78512175666348	-0.00245243778330978	1.5797718	1.5564645	1.56807450289804	1.55311959736018	1
2002-03-15	0.0889018571428571	11.0503853038645	389859400	0.0460430148664407	56.9930884599251	0.0660832294002032	0.872692364705368	0.152950189332471	70603691.5957832	105.483484154067	1.90152658853767e-11	898299.503500006	0.0173827820512829	48.2580670034796	302.753365510626	102.717204007942	0.191453	0.0109988987586771	0.6	3.57973878259194	0.127651464373232	98.6767546990741	0.0419422839747414	0.059089852385971	0.17100920320301	85814750	-12.8839842171104	-0.572044621664997	0.0039080437402272	0.0348216021090093	85.7383741317392	0.953956985133559	0.88109785970504	0.828185104647312	0.986923369820496	1.5822346178135	2339230368.73309	-0.417452782130707	0.937257277259434	0.0210618662107061	1.5834858	1.5660692	1.57790733526536	1.56120203420378	0
2002-03-18	0.0869120714285714	10.5671182164932	313720400	0.094576402097688	55.4484837728462	0.106623837505077	0.80207539897804	0.156197524506079	72057553.93311	104.410216201595	4.97707157304403e-12	490708.563100006	0.0325203333333342	48.8840010272074	336.399603829764	105.142408844003	0.194654	0.00660838332422412	0.5	3.78413765873168	0.131109016819324	98.6791741352959	0.0422130313612996	0.0557144881810367	0.193989935938199	86369360	-11.4051361757481	0.1576688591623	0.00372679523431508	0.0348830163063144	74.4032847390616	0.905423597902312	0.889206439104131	0.848525549466251	0.970568218379889	1.6086342545677	2350703128.70087	-0.453577086671804	0.0336892224482672	-0.00845276694292241	1.5793878	1.5689506	1.57998022351024	1.56537002798491	1
2002-03-19	0.0751263571428572	10.4233350762631	374306800	0.124180961211559	56.1192727841972	0.158630682147501	0.799930607258636	0.159675197792295	67792661.9716563	104.383233267385	8.72431106651008e-12	-298565.558899989	0.0379711602564112	64.2536635603886	360.954800487296	103.240539181495	0.0896430000000001	0.00230852534571158	0.6	1.55933637188604	0.0579870419073674	98.666270431622	0.0383255674104304	0.0522367040269154	0.213111159143065	84520450	-11.832750506885	-1.4471038258204	0.00920460672277695	0.0272138019046358	79.283323588856	0.875819038788441	0.884743972332234	0.860598357088246	0.93303520282021	1.64629532765492	2356761853.52132	-0.402199865922064	0.620840319271186	0.00443613053280312	1.5810526	1.5774027	1.58370981567349	1.57006075016948	1
2002-03-20	0.0720651428571429	10.2898221603353	447886600	0.116113594861785	56.5675365621959	0.136791913348243	0.789353252236146	0.160619908218772	65888129.0035748	104.285265150665	5.66300954881749e-13	378284.129300011	0.0414805576923087	74.2137435301537	384.271882867726	102.214948032606	0.04034	0.0023409145601503	0.6	1.42765288185771	0.0256062615476613	98.6561533944743	0.036411831455782	0.0490717295126887	0.228917463592437	84631400	-10.6069724210007	-0.439881946238923	0.0102515422740036	0.0266173346530587	82.8848979851079	0.883886405138215	0.884458116600894	0.868551610259129	0.916271129284426	1.67911755037213	2379756144.60939	-0.426434515423671	0.768315472772838	0.00281346392353266	1.5865594	1.5828454	1.58769054378233	1.57471370468412	0
2002-03-21	0.0716196428571429	10.5156477676782	293798400	0.390786638538859	51.3252653127783	0.277354896496117	0.604997505467627	0.144776690522127	99837157.6917024	100.979816070949	-3.34946873770996e-11	-3041723.3644	0.0465127564102574	60.8962537046377	417.08658333972	98.4184957216674	0.047383	0.00149522546462858	0.5	3.14496440284778	0.030964884547685	98.8952170777589	0.0299660751899524	0.0452505986481415	0.230874462005026	86751420	-1.2151312675575	0.568770527556978	0.00262804011068213	0.0191384707351415	-87.0737003207618	0.609213361461141	0.792709864887643	0.843271028468634	0.691587537725663	1.47336211271887	2524953962.63187	-0.360500406894114	-1.7143981107279	-0.0264302298731083	1.5845102	1.582141	1.57647069585489	1.57095321292337	0
2002-03-22	0.0658543571428572	10.325696568491	243250000	0.494177939773479	49.9450161655014	0.232023936859755	0.529150858846788	0.131681515746982	99804629.9149613	99.950222714797	3.15942522611993e-11	-3497937.6411	0.0488851987179495	59.4803758119184	434.569019252462	96.1292919926013	0.00128099999999987	-0.00317414055115743	0.4	-50.8873841767624	0.000830811814444166	99.1544319249703	0.0251489924830328	0.0412302774151198	0.220766381865367	84197890	-4.34109427136851	-0.543719078716464	-0.000460323355069673	0.0167038532511651	-43.4470852411666	0.505822060226521	0.697080596667269	0.794540884534846	0.502160020932117	1.23660878568734	2506638552.02439	-0.334645224793901	-2.21890898279856	-0.00744383368729146	1.5734968	1.5784913	1.56514913056992	1.56578099239185	0
2002-03-25	0.064936	10.7772452572092	177542400	0.783953863842071	44.6309307385198	0.193310663347552	0.295537148130855	0.131793704096758	77413689.7626615	96.972470191526	-3.12423793899033e-11	-1847996.76039999	0.0464676217948725	59.6983341542376	432.334601567123	94.4579538741949	-0.065952	-0.00761446868610729	0.3	-93.6327868852456	-0.0431662087975951	99.6225698735848	0.0205054545997227	0.0370853128520404	0.191976003573679	82147660	-5.30738894516145	-0.0441793726253401	-0.000419558782906996	0.0166233332994339	-153.081686604043	0.216046136157929	0.536735776497489	0.708605848522394	0.192995632447681	0.794035503241286	2457937395.78366	-0.311701238755042	-4.18546885498881	-0.0311998888733426	1.5556962	1.567542	1.54180708704662	1.55293408468424	1
2002-03-26	0.0610074285714286	11.4620553777357	242002600	0.78664701336987	45.558163899445	0.220448345956135	0.339179012605944	0.13375427168989	68578776.2435517	97.4717790523916	-1.8053640820227e-11	-1329715.01109999	0.0411481538461544	59.2872087354069	434.594702867627	95.7941940593756	-0.076837	-0.0140311865122676	0.4	-3.96627550844831	-0.0498855686656448	99.9412113491095	0.0230654965535901	0.0342813495923503	0.154796134307711	82119030	-6.16862489808517	0.130894483374419	-0.00172234245366352	0.0153141382242509	-175.505670518399	0.21335298663013	0.428941513208369	0.615384403417719	0.0560557327896705	0.473291955839494	2486138909.54312	-0.279912787409656	-2.88396918878613	0.00469958883692301	1.5378956	1.5594741	1.52859339136441	1.54370352383256	1
2002-03-27	0.0586605	11.9701677820663	273928200	0.782484756790452	45.6473767191465	0.323341263318273	0.308785066059361	0.121523709265968	58052881.1425753	97.2084399146553	1.24216165553661e-11	237228.749100005	0.0305707243589752	57.842235754354	434.501692627711	96.0703890679208	-0.101809	-0.022125854967586	0.5	-1.98986906439049	-0.06554978294151	100.177035073217	0.0229659198956216	0.0320182636530046	0.114553890778302	70838320	-10.4467123851504	-0.704224002201371	-0.00261181733123962	0.014752129051425	-126.302066705503	0.217515243209548	0.358466089875429	0.529744965570289	0.0159083384857091	0.219143953809553	2483362897.15002	-0.28746497182131	-1.90858964881968	0.00042662613589034	1.5193266	1.552943	1.51999792757627	1.53626779222664	1
2002-03-28	0.0567727142857143	12.2094523814683	301042000	0.699330532522093	47.4983806975741	0.381940787746931	0.297795060678097	0.0916251797361032	48469298.497396	97.638456131246	1.25886080151068e-11	183841.81620001	0.023638173076924	55.8619809517471	427.0205989756	94.8697180034966	-0.067232	-0.024101987043234	0.6	-1.70303427608168	-0.0434038831676601	100.277257424191	0.0318875414421125	0.0319921192108262	0.0776619928575473	66482290	-14.6596093193799	-0.911248869685007	-0.00282346067333105	0.0145542672049429	-81.743637965121	0.300669467477907	0.339200549076255	0.466230160072278	0.0851413270842095	0.0835209482606958	2483362897.15002	-0.305662298618332	-0.203769740193627	0.00848528490797962	1.511643	1.5480766	1.51853628505085	1.53251237545816	1
2002-04-01	0.0587115714285715	11.3589451907509	350803600	0.37086290526808	54.1418684466441	0.355011450425689	0.648782215825853	0.0780541437803347	49682965.5621724	100.687484504622	3.46785933631556e-11	1432204.9294	0.0161884807692316	54.9834559105296	423.628191511749	98.8682718420126	-0.00191999999999992	-0.0188327949683339	0.6	-4.07829544654796	-0.00122514784096933	100.060302264128	0.0379064997927192	0.0331749953272048	0.0568308662884709	64607970	-15.2314044936554	-0.277800527213923	-0.00159810787254708	0.0168258753816757	-11.9023019335062	0.62913709473192	0.43584606429481	0.456102128146455	0.39533393659152	0.238867145319666	2516303605.51548	-0.127831889491792	2.98950737981715	0.0328310487711703	1.5163814	1.5449391	1.53442352336723	1.53863703446577	0
2002-04-02	0.0567975	10.5691885136562	299854800	0.533022083985377	50.7290453610329	0.315163488707242	0.43458646798697	0.0769880018033533	44809958.221478	99.1269101012234	5.82916620214789e-12	622423.076800006	0.0109920576923088	55.8437018294488	428.553629139817	96.8611756513607	-0.0230519999999999	-0.00986312417827196	0.6	-3.66530676786844	-0.0148461816507244	100.039984316521	0.0362712305778947	0.0337942423773428	0.0409146760199874	62802180	-15.4179570468685	-0.220435998233192	-0.00176791148666527	0.0169673630560825	-12.2770103702824	0.466977916014623	0.446223348201415	0.452809201498108	0.433051641608027	0.228220538356871	2512750426.84777	-0.169209473664836	1.36157188123547	-0.0160734715930649	1.5256018	1.540649	1.53669068224482	1.53910757365381	0
2002-04-03	0.0577669285714286	10.1364820707409	246222200	0.66606494678675	48.0527530892816	0.331705862458341	0.256048815965545	0.076136477763965	28968047.1673918	97.7648276359525	-5.79623363402064e-13	-1185611.36189999	0.00473670512820612	49.8635360690411	417.838908845412	95.3049913138955	-0.0768369999999998	-0.00280511062528445	0.5	-3.10034241078596	-0.0492911744337172	100.13982615846	0.0338752128411335	0.0338104364701009	0.0239927147618113	62050030	-15.0775357096918	0.0663133948672758	-0.0020528999121517	0.0171363461471303	-25.1194884724199	0.33393505321325	0.408793916538693	0.43813743984497	0.350106869926139	0.111037858819474	2477197274.05723	-0.157569445189954	-0.265927184548314	-0.0133831265722866	1.5293158	1.5336057	1.53137245482988	1.53576728753493	1
2002-04-04	0.0610832857142858	9.74538379596528	330846600	0.187924910553691	56.8610952592064	0.349057481399343	0.86607263285151	0.0747163410600516	38985086.0979071	102.323860524086	1.62992942461041e-11	2566219.6763	0.00256130128205201	57.6357528585253	401.587556574334	102.595829812919	0.0102450000000001	0.00914366663940215	0.5	4.72719110091285	0.00644646540751348	99.7975310895444	0.0457502733918156	0.0361984038544438	0.0248536699178237	63453670	-10.602437452734	0.443252841254839	0.00158067624368439	0.0218034695793028	58.0214103907751	0.812075089446309	0.543220974174565	0.473165284621502	0.683332353280692	0.399265278018746	2543423945.5745	0.017533580891794	3.51994113159355	0.0472848728983082	1.5476286	1.5334776	1.55237196988659	1.54642250798313	0
2002-04-05	0.0630220714285715	9.60335455945163	261259600	0.254449588644378	55.4522503996522	0.323051393693374	0.758198286643729	0.0761295583129565	42958968.1005087	101.591209288469	2.41004599781568e-11	2759199.4395	-0.0048719999999991	58.0763497173345	392.09982645424	102.698206684447	-0.00704300000000013	0.0159121267800225	0.5	-45.3252103278215	-0.00443613053280312	99.6074621032993	0.0572044062078298	0.040399604325121	0.0339094646925053	63704900	-8.91734926287643	0.144486898909868	-0.000398678346119016	0.0211243022803219	86.0143367304981	0.745550411355622	0.610664119901584	0.518998229714862	0.793995900275027	0.566494641373905	2555553428.81942	0.0239279389731346	1.95753844906209	-0.00644646540751348	1.5613312	1.5364871	1.56295664659106	1.55327768834983	0
2002-04-08	0.0641004285714286	8.98603937072048	195881000	0.329285793133901	53.836268268738	0.365964692011609	0.674598801054035	0.0745342568286775	53881003.7013555	100.872809673187	-2.78383613139468e-11	-733203.589999995	-0.013836339743589	50.2162134827599	400.815510620563	105.182048567242	-0.0230510000000002	0.014792669554911	0.5	-102.449836065573	-0.0145514936748575	99.5381826187682	0.0582713749610739	0.0439739584523116	0.0444976384395668	63601650	-8.01725725557834	-0.152365629376458	-0.000317118515227366	0.0210931432626087	36.1479214959624	0.670714206866099	0.630680815556423	0.556225758328716	0.779590930011836	0.631247844347183	2603498684.68229	0.0646154059997723	0.600783196366137	-0.0073018992185217	1.5626118	1.5394966	1.56617143106071	1.55679101774077	0
2002-04-09	0.0640493571428572	8.95409372495158	147998200	0.497570767555798	49.838776935183	0.295604799742656	0.427225650472903	0.0725533912802477	42530036.6675172	99.1789779483907	3.40331837319458e-11	-1081938.11949999	-0.0163441923076917	49.4385585339457	392.160712230569	102.728060680378	-0.010885	0.0119623466726752	0.5	-3.92375667359228	-0.00702901049324528	99.6575054497289	0.0528531153486835	0.045749789831586	0.0482153643332595	62710970	-9.43072314925263	-0.235314086934466	-0.00197255431989717	0.0215940764686937	60.8097304313089	0.502429232444202	0.587930287852349	0.566793934836594	0.63020299388386	0.523407660164099	2564322463.89432	0.0825608913882732	-1.0402615162879	-0.0189077466914961	1.562996	1.5442989	1.5584962873738	1.55431010542427	1
2002-04-10	0.06558	8.82493320046863	204243200	0.253579205225912	54.2885436938826	0.26685218611579	0.744445287722091	0.0727041517240909	39985625.7203708	101.496061314303	-7.07720287136634e-12	303194.545500007	-0.014213967948717	48.3579167050748	383.489056444365	105.070245214455	0.036497	0.0143948233810042	0.5	-27.1570160926449	0.0233852686292252	99.5538652484647	0.0543532603218617	0.0474704839296411	0.0558224758537396	62347530	-9.40985618524536	-0.268653383298219	-0.000514063436370766	0.0226082275371429	93.6504866539509	0.746420794774088	0.640760456826262	0.591449442166483	0.73938248614582	0.61702858233541	2585863654.71094	0.137257399648663	0.851981529027634	0.0229704454351791	1.5746494	1.5519826	1.5653318582492	1.55879972261986	1
2002-04-11	0.0601035714285715	9.04861810807006	306056800	0.166433043004899	55.7968195870255	0.217273742004136	0.827550865885277	0.0765659764501501	22680735.3523192	102.241425893464	1.06957488685204e-11	1660351.87010001	-0.00943217948717878	63.9404383319295	372.638554280833	105.027470732964	0.096687	0.00842004115016433	0.5	4.04725925615856	0.0626632558603337	99.415257422619	0.0540633941432571	0.0487890659723643	0.0681066296543742	64928640	-3.58964783155421	-0.414381475262445	0.00192842388659451	0.0214507690288915	144.427252006751	0.833566956995101	0.705029290215875	0.62930939151628	0.856469087615064	0.748443337800664	2533824466.25933	0.119665533219291	0.906523859285738	0.00807809835776585	1.5741372	1.5608829	1.57415790549947	1.56480159123443	1
2002-04-12	0.0596443571428572	8.88395683822379	386117200	0.079293685356559	57.3135100246091	0.229424430359508	0.899043843837516	0.0801356629693286	26620803.0579023	102.930606437146	-4.80706891297072e-12	1164590.12880001	-0.00333279487179428	55.6168900452858	365.980333095311	102.452946562312	0.10245	0.00535534880986341	0.5	2.85924282346415	0.0659764090774004	99.2541056568837	0.0532539792091604	0.0496820486197236	0.0851919136141133	66215450	-1.75677722739648	0.459850056669076	0.00303279009799124	0.021330325751635	114.457976891896	0.920706314643441	0.77692163169173	0.678513471574764	0.973737951925663	0.907436090532454	2584529822.14518	0.153616022052061	1.60832868440495	0.00801274205398972	1.5782352	1.5697832	1.58431060366631	1.57204057464635	0
2002-04-15	0.0570933571428572	8.73105708765226	311274600	0.105436853565596	56.6851031629649	0.191188236106255	0.849375983563175	0.0827093059423028	28241558.495832	102.673614181145	2.65373597389722e-12	368854.106600006	0.00330423717948802	63.6952307239728	362.540755845749	103.863744748496	0.0979669999999999	0.00671077887841831	0.4	1.78277749435803	0.0631525695978109	99.1696533974032	0.0508322115776867	0.0499120812113162	0.102851566356987	66946320	-0.923547383460654	0.130172645461155	0.00505592242762904	0.019110605654473	108.62255256797	0.894563146434404	0.816135469939288	0.724387471029605	0.999631467758654	1.00126123410984	2595217345.42518	-0.129703258371648	1.18725867708948	-0.00239721334369913	1.5838698	1.5732408	1.58979840244421	1.57726483380156	1
2002-04-16	0.0584881428571429	9.72407082411627	464919000	0.0970000488856777	62.1910100706813	0.218756174458043	1.11033567925129	0.0940244984000128	44245125.8037529	105.496125402974	1.45421537882279e-11	3496293.66800002	0.0116898012820519	73.9097448261387	373.523960253724	108.378903373104	0.132544	0.0130465233364433	0.5	1.5803475841555	0.0838377163533657	98.8688328113801	0.050271349148634	0.0499839347987798	0.130474551575444	70821590	7.97325605793066	0.868592862361229	0.00683373719539659	0.0202025222212007	177.409270391726	0.902999951114322	0.845090296997633	0.764621746352281	1.00602739828834	1.30191796837653	2660556330.64959	-0.0102372086792963	3.35966342743864	0.0291704316635344	1.604872	1.583934	1.60925126829614	1.59015431856491	1
2002-04-17	0.0601718571428572	10.8281605551727	563981600	0.0220674173501594	64.6131401295008	0.266552046390446	1.15455925976183	0.107373431959801	69477439.2974801	106.737009644547	7.39208473228051e-12	4813561.86220001	0.0179081666666676	75.7872277931364	388.599525159031	104.859471227211	0.105651	0.0150272766269604	0.6	1.50562996391908	0.0652791732216765	98.5453429871945	0.0532507838295082	0.0506373046049254	0.167382734475541	72745400	8.90680076270698	1.13234377774426	0.00783003198042032	0.0202061808809009	176.038058796148	0.977932582649841	0.889371058881702	0.806204850528755	1.0557034755876	1.63845447268143	2744570558.23115	-0.0314465193367163	3.45377250015956	0.0142725056394811	1.6234412	1.5990453	1.63011717886409	1.60500789700765	0
2002-04-18	0.0639346428571429	10.9889569255722	463554000	0.252843381061975	57.1534767657429	0.290682471453403	0.868405979360649	0.11052344411004	90689834.0276003	103.771475659152	-1.6338491201622e-11	-1077187.384	0.0233590256410263	68.1143248889568	413.8872279786	102.708181041155	0.0858019999999999	0.0172793413688203	0.5	2.11478906880591	0.0541768682945556	98.5686727819182	0.0536860312272383	0.051247049929388	0.196316941297292	74087790	9.6069262491461	1.30939424651104	0.00530637308976745	0.0222192662792182	76.8164227831923	0.747156618938025	0.841966245567143	0.818125315541551	0.889648105618327	1.65702703765418	2810476582.6438	-0.174012706442371	0.183996010768599	-0.0271757765201858	1.6304846	1.6023109	1.62908711924273	1.60901137027899	0
2002-04-19	0.0595468571428572	11.1601420237096	369702200	0.451842637409282	53.0980226671904	0.146626737202415	0.683943708697742	0.111462220148585	71500225.8823223	101.867676716116	1.65963785457501e-12	-3542740.67419999	0.0287153782051286	61.0653654382716	418.953462554744	101.710033250647	0.078757	0.0157183361359007	0.5	4.76221272664279	0.0504922758378316	98.7548682952024	0.0522652595943738	0.0514506918623852	0.211355344675712	71075970	9.41024725297358	0.634473340135596	0.00171359987516225	0.0213821869556795	52.6680840507652	0.548157362590718	0.744029951241668	0.793426860774924	0.645236132175157	1.5150574941972	2733386714.1238	-0.240902386047278	-1.5890005615307	-0.0170677190290106	1.62946	1.6038476	1.61922241282849	1.60728075750099	0
2002-04-22	0.0603313571428572	10.5881317966594	302345400	0.621709576054851	49.1664228843675	0.150957880941611	0.512031304806127	0.110855535690052	54598823.3341942	99.9429839873165	-3.09322889448431e-11	-2262433.46979999	0.0264948589743592	60.1538647343978	432.708868141972	101.784277054796	-0.0236909999999999	0.0121875063907488	0.5	5.22570016474465	-0.0149706544812299	99.0667471671556	0.046176162702499	0.0503957860304079	0.209518986707202	71916390	6.71447366374361	0.27918265597847	0.00156582484353314	0.021520318301791	-42.9923997969756	0.378290423945149	0.622116775476162	0.73632349900867	0.393703328411146	1.24279027922161	2723765468.8118	-0.237582256972883	-3.02429105637181	-0.0181780574207532	1.6234412	1.6036555	1.60304160855232	1.60062607431899	0
2002-04-23	0.0593109285714286	10.2367852864498	243978000	0.727409931553286	46.8421860483331	0.16389413179921	0.388860910125196	0.105423613056324	34442465.5753512	98.621337782104	-6.99677895537559e-12	-1493610.29649999	0.0256041987179489	59.8658606858824	437.955271508422	98.337431911149	-0.0313749999999999	-0.000159565184868063	0.5	4.9072950136856	-0.0200046392074631	99.4113903232929	0.0402106886484608	0.0483587665540185	0.192696297872796	71549380	3.60740709727919	0.0846004226458916	0.00170005123442841	0.0214261597711039	-82.9017359266161	0.272590068446714	0.505607873133013	0.659418290383451	0.197987038632136	0.925330734031959	2692467866.10109	-0.250205603369436	-3.6551455192614	-0.0114804501337468	1.60436	1.604616	1.58627807236822	1.5919215153519	0
2002-04-24	0.0564537142857143	10.4716806840545	208866000	0.95996188032165	43.0823175258007	0.127653260911995	0.167257899243334	0.0978661583023962	15617386.6956835	96.6083371928128	-3.51831352956256e-11	-1062818.21729999	0.0237776282051283	55.0178386945717	434.761229193356	95.6154314899391	-0.0505849999999999	-0.0155767294248024	0.4	-2.1256515115067	-0.0326951645968733	99.8464184028145	0.0317980972139638	0.0450466326860076	0.160096388509801	70081970	-1.40285533466622	-0.879679688717971	-0.00317241551149749	0.0173534486945005	-131.009182381192	0.0400381196783503	0.350417955314792	0.556418178693898	-0.0615824914434202	0.510645217817607	2665062749.57585	-0.227792162511072	-4.31399767137175	-0.0199924246079319	1.5743934	1.5989173	1.56485738157881	1.57921142165156	1
2002-04-25	0.0549230714285714	10.9352746216177	257416600	0.763870039786106	46.4571315067109	0.143280639168589	0.289489691046775	0.0918097740029554	12310238.2963171	97.9015340396333	-1.50470869978949e-11	4450.0883000074	0.0256821474358975	49.7883956327151	429.017608890898	96.2490091087213	0.00128100000000009	-0.023304589448664	0.4	-5.21754941243814	0.000829777999419468	100.051958501558	0.0254117051205818	0.0411196471729224	0.124733438399316	70913220	-4.11197854187976	-0.359971215230942	-0.0016616811492445	0.0179585274311728	-113.000913510371	0.236129960213894	0.312321956947826	0.475052771445207	-0.013139672046937	0.292184474918988	2686572726.89208	-0.132728668027201	-1.59118235706795	0.0146171959047967	1.5578734	1.594179	1.55804725438587	1.57288698135127	0
2002-04-26	0.05711	11.9631253126513	181171200	0.996491331524945	38.6336122863164	0.0872818637031606	-0.18186883716359	0.0940892798422779	-11851238.3154955	93.5214049071867	-1.3295878721864e-11	-2165499.0315	0.0215817884615384	49.4170764882692	405.638982164312	92.0400381315539	-0.10565	-0.0315841485577777	0.3	-1.73624058802438	-0.0692528794596716	100.60182254051	0.0172509585728449	0.0363459094529069	0.0730360969236843	73369800	-3.1257464024199	0.153762098008301	-0.00442913481782172	0.0215219158454827	-154.219994127195	0.00350866847505544	0.209384194123569	0.386496579004661	-0.144840575638615	-0.24506663999293	2611439954.82058	0.0600013420824288	-4.56239635873702	-0.047112212023912	1.5326454	1.5810527	1.52981583625725	1.55478989383286	1
2002-04-29	0.0570079285714286	12.9287054384638	249243400	0.695520735340233	46.8788278576122	0.100406489229453	0.249186130098999	0.0982914664002259	-5632739.85678196	97.48159117468	-1.51512145927412e-11	-639150.852899995	0.0175428782051283	50.2272496935282	385.598582636643	93.084700061948	-0.057628	-0.0321551349208781	0.4	208.286679536674	-0.0368743935909245	100.660855897953	0.0152836540672416	0.0321334583757739	0.0286189513172941	74285330	-3.23398419877083	0.351812548096444	-0.000142262173602509	0.0242575761087513	-115.509617357982	0.304479264659767	0.241082550968968	0.338025236326097	0.0471971802547115	-0.354242595041643	2665478189.24651	0.211379903442344	0.083534395393269	0.0404565842265129	1.5253458	1.5743935	1.5312712241715	1.55104300404507	1
2002-04-30	0.0554262857142857	13.1834184654376	319484200	0.59826748196927	49.2738840299563	0.131852184596984	0.37652625543148	0.0980545873351129	9322862.8140521	98.7026356285462	2.09541676632385e-11	2767486.74650001	0.0128841923076923	50.7868021447653	361.653988695539	92.9528324627404	-0.0505850000000001	-0.025812174579235	0.4	-13.3433742986909	-0.0320322753536894	100.581034566195	0.018639372985146	0.0294346412976483	-0.00409403847840828	75249930	-3.04001825666949	0.222212190538855	-0.000877866360000447	0.0236424428953633	-57.7285767305946	0.40173251803073	0.294632539989556	0.323561004213917	0.236775611540834	-0.33413568433065	2711187780.07317	0.108176823206966	1.56224539144901	0.0128548602912249	1.5256018	1.5649809	1.53885781611433	1.55158627603687	0
2002-05-01	0.0575217142857143	13.9445181612257	265808200	0.689244277202885	47.1330416171109	0.167359120885622	0.260547962093251	0.0989878260660256	19541577.5812531	97.4777198843724	-1.85607893192486e-11	198776.83560001	0.00589007051282042	43.6747643132972	332.348062387321	94.3723121988756	-0.0653109999999999	-0.0150829239872577	0.3	-4.03413381664402	-0.0416552980535501	100.616832874296	0.0197668827555195	0.0275010895892225	-0.0319483418943944	75252100	-4.75537162616434	-0.640177716239528	-0.00231065891906937	0.0236636097941298	-74.26140028074	0.310755722797115	0.300006934258742	0.315709647562192	0.268601507651843	-0.40990291721017	2729079780.07317	0.121316825495559	0.53807115905408	-0.0120202360435598	1.5282912	1.5513423	1.53772621074289	1.5486547713029	0
2002-05-02	0.058236	14.4688445137676	205972200	0.780225972091565	45.0261565165767	0.0948320928620957	0.16303218290889	0.101878570417034	9830175.47737741	96.5362910335353	1.10438233504914e-11	-1053875.32599999	-0.00561497435897418	50.085110650568	312.909172951303	94.8359261340937	-0.131263	-0.0115212617726728	0.3	-2.24085844419855	-0.0829928707677204	100.738404081283	0.0193299686974027	0.0258668654108586	-0.0592938864467762	74012680	-5.37316587471933	-0.291173863292542	-0.00374911253813666	0.0235976851750995	-61.798718084707	0.219774027908435	0.273262632141973	0.301560642422119	0.216666611581681	-0.560442398821825	2683799492.42915	0.126856908913447	-0.622229986842649	-0.0121671410506359	1.5227846	1.540329	1.53078214049526	1.54288008561146	0
2002-05-03	0.0594605	15.1823789240845	148276800	0.836699396362496	43.7197806704389	0.0587040365461927	0.126797040450813	0.106406486686742	-5849237.76239777	96.0434630471876	-1.1810476519792e-11	-888045.932199992	-0.0195868910256409	43.7808295033686	296.843871227447	95.8418010033871	-0.166481	-0.00113060032660133	0.3	-2.03924782802145	-0.104892812995897	100.88248334588	0.0170549711052945	0.0241044865497457	-0.0870752677885722	73418100	-6.07485927050057	-0.260209793950381	-0.00412083248020274	0.0236156841792767	-76.229926680738	0.163300603637504	0.236608622640483	0.279909969161574	0.150005929598302	-0.732223267387222	2641752205.33046	0.116231318341886	-0.954931693702979	-0.00762743658869552	1.5291876	1.5309165	1.52231076033017	1.53605970640938	0
2002-05-06	0.0601065	16.9332744408231	85860600	0.943313631711952	38.0410275317582	-0.000926205401657904	-0.0972041515706962	0.120812504630646	-22839889.8847003	92.8925644078635	-5.57611777070695e-11	-2051035.03289999	-0.0318020576923079	31.5245120088282	282.496868779289	93.4020329080451	-0.176726	-0.00427608519745009	0.3	-0.674883953666637	-0.114983301962911	101.294961830501	0.00682789640488735	0.0206491685207741	-0.125858022338521	73269980	-6.00193580433377	-0.900815984377303	-0.00884800963459989	0.0229611493484818	-145.256084558058	0.0566863682880475	0.176634537856338	0.245484825393162	0.0389339627826903	-1.14607089592936	2602141423.65718	0.183234109964818	-4.33622071715578	-0.0372662654871995	1.5124114	1.5188786	1.49830750688678	1.52046721433494	0
2002-05-07	0.0602085	18.8570384252689	25173400	0.893206654705594	36.9590215038208	0.0179811530863216	-0.047155675961356	0.138851859398379	-30763345.7281756	92.4634388817753	-2.83520960433174e-11	-2068246.43269999	-0.040294294871795	21.5707881276119	276.096673595135	94.5309379139247	-0.160717	-0.0121667663515122	0.3	-0.462131230583711	-0.105893951897174	101.652954240176	-0.00157801870318086	0.0162037310759831	-0.171156694747776	73910200	-6.09434517296924	-0.49001917085285	-0.010442400377183	0.021978502330263	-180.703781135075	0.106793345294406	0.153354140335694	0.214774597040673	0.0305132269257365	-1.52169155935403	2590902276.31114	0.181561029649191	-4.09047695918817	-0.00797836896327392	1.4893604	1.5074811	1.47846367125786	1.50561426627405	1
2002-05-08	0.0637581428571429	18.0392793326379	134344000	0.342005110639917	52.3623817487407	0.0601377702949239	0.524287510235455	0.139450333433664	-5906858.58597183	100.341764589701	7.18116295504468e-11	6291083.02270001	-0.0418868910256414	33.3552830702865	270.638799777452	101.036500915874	-0.0102450000000001	-0.0113548669967765	0.4	-3.97137404580153	-0.00654401806456245	101.172522068026	0.00159713658167937	0.0132824121771223	-0.188708398973925	76556480	-0.382560006119646	0.0834747264146181	-0.00248760553041296	0.0329928371354884	9.1353881989908	0.657994889360083	0.321567723343823	0.25037230580839	0.463958558414691	-1.16102593034195	2677942374.8875	0.310360140684635	3.94541633577527	0.0811718764118584	1.4943548	1.511323	1.50578744750524	1.51558167240604	0
2002-05-09	0.0637140714285715	17.2799316037663	78190000	0.273529443726025	51.08877007578	0.1128259088946	0.483301332190929	0.13755966166842	10754177.0724602	99.7381735225504	1.56730529436905e-11	6317177.51070001	-0.0432906346153852	41.3913607736269	282.231169270617	105.128166841212	-0.0038419999999999	-0.00733855922654181	0.3	-5.53784742755766	-0.00247738434580275	100.866999092089	-0.00202279700152697	0.0102213703413925	-0.190284216148684	74273500	-2.06039362090891	-0.513619025987239	-0.00180642776056653	0.0327695680052475	53.2224673086083	0.726470556273975	0.456535334320541	0.31909331531244	0.731419372336743	-0.925903153058272	2701423969.14499	0.190177293806563	3.02383976911721	-0.00741381641498706	1.50075780000001	1.5117712	1.52016129833682	1.52164118651403	0
2002-05-10	0.066809	17.4683726212417	19341000	0.555326875823105	45.3477481757095	0.0605029473413708	0.242273807423929	0.137610347650708	8456636.96930408	96.4972052554588	-3.97385379105844e-11	-1962766.12349999	-0.0418006858974362	41.9270872115031	280.815727466164	97.3288697168915	-0.0288140000000001	-0.0102991701531126	0.3	-3.33068555677405	-0.0191129644051139	100.94947073892	-0.00886135107833264	0.00640482605744746	-0.194361529277154	73212930	-3.07780663286745	-0.135029021658912	-0.00308867646111358	0.0337879256477649	-31.4939157879221	0.444673124176895	0.452581264272659	0.36358929829918	0.630565196219617	-1.02262869261041	2673121783.11513	0.121581008025053	-0.419907055592307	-0.036628004667243	1.49832460000001	1.5137561	1.51117486555788	1.51647042532966	1
2002-05-13	0.0691559285714286	17.7597850295223	85743000	0.259559369377304	49.6868491027819	0.0872256483105419	0.44820868727109	0.135826207795487	20669581.7053757	99.2804616159571	-1.62784213879102e-11	-321104.122499991	-0.0407909935897441	49.1415127608124	278.625889557759	98.640310264081	-0.0115259999999999	0.00080311868293656	0.3	-26.8474111675129	-0.00749094922462223	100.763733094444	-0.0112335548415381	0.00287714987765035	-0.189731893691203	72790900	-2.96195356305904	0.128969661716937	-0.000374298517889092	0.0345846255715545	-9.45803077673272	0.740440630622696	0.548534386389338	0.425237660995899	0.795127837176216	-0.879027860272652	2722202014.29734	0.134532325626329	1.91569106581128	0.0262392110852884	1.5148446	1.513628	1.51841691037192	1.51945780254245	1
2002-05-14	0.0729674285714286	16.9454163726061	217369600	0.0217743480760181	59.1051597882935	0.125994256006252	0.988327696373091	0.129622480338386	58338734.3108006	106.234697446943	7.14218698880014e-11	8355594.29460002	-0.0295035064102569	58.1121633780989	281.198543174355	106.797298274201	0.16648	0.0211232264304342	0.3	2.9055524695463	0.107053651634165	100.005015549195	-0.00293197369988119	0.00171532516214404	-0.154313848605259	71690010	4.39491943744928	1.32142617373981	0.00602226082844061	0.0387475429316338	229.647808675577	0.978225651923982	0.691764808234219	0.514080043408673	1.04713433788531	-0.199800006812889	2841206920.1102	0.298258592074119	6.78248536800727	0.0674323888348754	1.555056	1.5222082	1.55888894024795	1.54134420208019	0
2002-05-15	0.0747531428571429	16.5577424305488	133413000	0.197240214912938	56.8408865674519	0.0546189882511109	0.916820560167968	0.121522848627736	63018947.71874	105.046652613531	3.42358667692591e-11	6150546.31660001	-0.0253661282051292	64.5624835039876	281.986561322704	106.711675304932	0.0845210000000001	0.0230913246462554	0.3	4.1407755470122	0.0536278713199494	99.5738879460036	0.000347408892417578	0.00144174190819875	-0.106739818205248	70934710	4.76443198142751	0.547693445604054	0.00405011739964888	0.0389725329371402	205.128446877153	0.802759785087062	0.728763133851833	0.585641073556393	1.01500725444271	0.221141750279696	2822058200.07287	0.283777857337383	3.38764717798613	-0.0129691960877029	1.5667096	1.5305322	1.5788269601653	1.55540943806561	0
2002-05-16	0.0713347857142857	16.082394106361	76650000	0.214924772582032	56.3476748795166	0.0213966979831319	0.900393569510303	0.119924658164495	63934749.2248302	104.799276035679	-1.90493807585926e-11	-1014235.7435	-0.0217048782051292	65.5494961022686	286.904623967807	107.230922937116	0.060189	0.0250080423007961	0.3	2.31308370949247	0.037999667603353	99.291975175615	0.00204453128530835	0.00156229978362067	-0.0554411501248464	68751480	2.16392478969221	-0.295072380781136	0.0071394142010644	0.0363223501675375	134.895431401147	0.785075227417968	0.747533831707212	0.639605326273332	0.96339084257497	0.523120942641619	2839897675.71287	0.228809955445098	2.5143716484147	-0.0027733434253715	1.5797718	1.5402648	1.5906246401102	1.56610226750822	0
2002-05-17	0.0723552857142857	16.0399535225978	17526600	0.265441936425535	54.8826761810846	0.065518370126032	0.831245927934702	0.11988183330229	53183982.2857203	103.961395045336	1.16827276509811e-11	-505801.394699995	-0.0165783461538471	65.3692650409413	290.61140386849	110.41942327834	0.0659509999999999	0.0321870506705918	0.3	3.73082401077274	0.0420550247457503	99.1676018889043	0.00164095195566949	0.00157803021803043	-0.00796957531131737	67015060	0.295827711427461	-0.140942121473369	0.00362374678821982	0.0351252928368242	109.880339983202	0.734558063574466	0.743208575662963	0.674139742736543	0.881346241515804	0.686968222575191	2821201064.22577	0.332034165605553	1.1390304257572	-0.00796487890116254	1.6014142	1.5498694	1.5942210934068	1.57252258250673	0
2002-05-20	0.0714472857142857	15.9196524329803	-49952000	0.333639713133832	52.8837381771077	0.0752080412062881	0.73257534873959	0.120962108601736	44746483.5405951	102.794219777521	-1.32173255150522e-11	-961852.148599994	-0.0101876025641034	58.3241831645184	297.81611790648	110.102336986438	0.067232	0.0300356924094154	0.3	6.69135802469136	0.0433680125109683	99.1840863395063	0.000234109497541102	0.00130924607393257	0.0300816739532195	67021150	-0.274100430857118	-0.0401188282090601	0.00192851116679676	0.0352137956129343	58.5626047654097	0.666360286866168	0.717592479397365	0.68862398829015	0.775529461611794	0.718948402350716	2824576057.02966	0.116300139672743	-0.901253514029613	-0.0108541532854179	1.6116592	1.5632519	1.5908560622712	1.57463229477823	0
2002-05-21	0.0748655714285714	15.1324803648356	-120199800	0.65695587341912	44.5917215644464	0.0496398446934609	0.298252181183601	0.120428585499968	18214997.0975857	97.6360644144824	-4.6183974160045e-11	-3462039.86239999	-0.00666182051282127	57.3471267042864	288.538950869356	96.265848945967	-0.00320200000000015	0.00917534453387805	0.3	-11.5160750311198	-0.00212932004081973	99.6573765071917	-0.0110139758484236	-0.00115539831053866	0.0405663759336816	67615170	-0.411921928403984	0.269063016758786	-0.000913633625857216	0.0379216006817375	-10.722053801285	0.34304412658088	0.592743028458536	0.656663668346279	0.464901748683052	0.318004472963973	2759595996.85553	0.269327525279758	-5.7263550652678	-0.0531247691404835	1.5841258	1.5695909	1.5612927081808	1.56145660481855	1
2002-05-22	0.0764472142857143	14.6041081667237	-47481000	0.439727335126904	50.2373894118342	0.115350817881387	0.5959469715174	0.120465347088294	24176884.6255584	101.099538053331	-3.27145456195647e-11	-876551.764199985	0.0057462564102555	50.7865329374553	279.614032165877	100.537410525731	0.106932	0.00162937281203079	0.3	6.42358807286596	0.0711394073161413	99.7132854723485	-0.0189833623216218	-0.00472099111275529	0.0464949825068617	69495510	-0.239855339223154	0.194992461570692	0.00256863918038037	0.0390379738305089	-15.4248149459352	0.560272664873096	0.581919573930056	0.631748970207538	0.482260781375093	0.281212457487356	2825390027.92753	0.10998235726263	-1.41871658397224	0.0360024618697615	1.5718318	1.5692707	1.55993947212053	1.56068867666973	1
2002-05-23	0.0794063571428571	14.0024853246016	44868600	0.222498796834689	55.1579114608886	0.154630009462492	0.869948231530879	0.123233752407733	47969765.7780924	104.444511383597	4.6601328013332e-11	4544910.79140001	0.0224969358974354	57.9372813061348	284.678692366163	107.976013961942	0.173524	-0.00264851304637332	0.4	3.23627407382068	0.113868978854487	99.4575365278869	-0.0186559498353429	-0.00750798285727281	0.0620632843957747	71685460	2.03483437895077	0.470403927655344	0.00563724652638379	0.039857183524684	53.8005540636832	0.777501203165311	0.647113450341808	0.636870463585628	0.667599423854168	0.530252779695428	2908267194.05454	0.226431523091063	2.13632345344046	0.0347512025750715	1.5714478	1.5756098	1.57739298141369	1.57007255363887	0
2002-05-24	0.0797805714285714	13.4393177411447	3325000	0.48267047471775	48.9189414434732	0.193430005845014	0.508154391617217	0.1215034303057	45998658.2574887	99.9358124347833	-9.27792653982843e-12	1172745.1862	0.024426012820512	58.8992184484817	279.934635485717	100.877160364564	-0.0140880000000001	-0.0131308948328713	0.4	3.56848914621957	-0.00906925337082581	99.6390401887774	-0.0213090306172397	-0.0102681924092662	0.0667302435966244	69950370	-1.79413019901981	-0.40708137891594	0.00532826547532715	0.0402247114242245	8.03872412985031	0.51732952528225	0.603852141988622	0.625864356386626	0.559827713192614	0.382748783215603	2882049964.3798	0.116411542158381	-1.33463978529047	-0.0417663558134541	1.5604344	1.5809243	1.56704432094246	1.56575881661362	0
2002-05-28	0.0795765	12.7203560780385	-34104000	0.642953998195251	47.9549412743691	0.169993605507966	0.446702690239087	0.12069660435188	45329435.3504772	99.228304433053	-6.74249245237644e-11	-1573651.14339999	0.0257682051282044	60.0358942443903	272.224341219491	93.6353274998125	-0.0134460000000001	-0.0196547782429828	0.3	3.54704884381415	-0.00871884790706645	99.8403792979792	-0.0223788744159137	-0.0126903288105957	0.0617059968702982	68418210	-5.48080208970318	-0.483286997660056	0.00539312994369801	0.0402023842954661	-67.1764164247612	0.357046001804749	0.521583428593998	0.591104047122417	0.38254219153716	0.207074462346468	2898091353.25253	0.021917196771905	-1.3371372944006	-0.0070634109512277	1.5507018	1.5811805	1.55651721396164	1.56025048632023	1
2002-05-29	0.0751722142857143	11.8895463128926	-34104000	0.642953998195251	47.9549412743691	0.140978249517018	0.449584299703822	0.12091502797873	42027717.3826551	99.2878744275251	1.18425455739028e-11	-203688.61799999	0.0306444551282046	57.8311020344735	270.489392829702	94.8576113097956	0.0422610000000001	-0.00859293271207399	0.3	-17.1496794015496	0.0279091567601766	99.9931099683248	-0.0219872686916127	-0.0145497167867991	0.0509218149687518	67678590	-6.2453067207651	-0.67745893773656	-0.000646676510835974	0.033122643924373	-55.7552052562529	0.357046001804749	0.466737619664248	0.549648571303027	0.30091571638669	0.066819173807442	2902011963.03277	-0.0630332965902536	-0.820262995733048	0	1.5573612	1.5707435	1.54949914264109	1.55574367062564	1
2002-05-30	0.0767979285714286	11.1180801024001	14989800	0.574981542336813	49.4501052769214	0.149526726884489	0.522555259451547	0.120558476896244	44743664.865592	100.153107574448	-2.06009175293025e-12	345767.633400009	0.0321549423076919	57.5120811501669	269.832424145895	95.9936687688171	0.016648	-0.00514434662420424	0.4	25.4559210526317	0.0108019023019062	100.028261139076	-0.0181780172537964	-0.0152753768801986	0.0404647521440538	67449480	-7.61633069118162	-0.134365162488219	0.000536193633801395	0.033159118659269	-47.5580334262541	0.425018457663187	0.452831232330561	0.517376124978872	0.32374144703394	0.0282738316422115	2930789779.56239	-0.0961937615115372	-0.418375265293621	0.00913195662701799	1.5558244	1.5638281	1.54951576176073	1.55461736687553	0
2002-05-31	0.0750632857142857	10.4464905785417	-76384000	0.853062524429261	43.8943743578459	0.115452684054392	0.219945223045627	0.121641591331815	17428562.5658178	96.5063427290814	-4.70089409655715e-12	-2287031.3529	0.0209864871794865	55.6469041174287	267.369948020916	93.1627923822322	-0.147911	-0.0129587175129463	0.4	31.0608944954127	-0.0945291857882539	100.37750201047	-0.0208185543881196	-0.0163840123817828	0.0172149044497028	69026370	-3.31166972788219	0.439983944080296	0.000448749655934396	0.0332642289348154	-93.2861139973425	0.146937475570739	0.350866646743954	0.461872965567233	0.128854009097397	-0.29884948949479	2843185086.16978	-0.0358317258374771	-3.44634325972356	-0.0378986992552847	1.5317488	1.5515983	1.53031784117382	1.5432182092618	0
2002-06-03	0.0736347142857143	10.7070022016813	-135161600	0.895387127983454	41.7075301508991	0.135527548988641	0.117023908287534	0.127659968791601	781527.597336769	95.0089979952211	-5.35896891417822e-11	-3366725.48869999	0.0113202435897428	49.5290854060406	260.545479521932	92.6030505149212	-0.151754	-0.0146995532332172	0.4	-4.13125536173864	-0.0984404775648013	100.776423936644	-0.0197097425121104	-0.0170491584078483	-0.0182112906367604	69080480	-3.92684074971768	-0.121966346567866	-0.0026459146808279	0.0326552735130271	-155.784715082014	0.104612872016546	0.268782055168151	0.397509328767539	0.0113275079693758	-0.683039779555827	2828998368.07764	-0.0807742462627935	-3.55040433641593	-0.0168804878642503	1.5158692	1.5381518	1.50919489411588	1.52935108030511	0
2002-06-04	0.0700272857142857	11.4006556934534	-222117000	0.830560541485131	40.9748404062298	0.185780754456925	0.0895199151017339	0.131095367998995	3307508.16568851	94.4444859916804	-1.97556992895206e-11	-1095791.39949999	-0.00107950000000079	37.6847931403287	268.736712014198	97.1015187402724	-0.155594	-0.0167277373475956	0.4	-0.725554445787848	-0.101356971148719	101.112221559396	-0.0240056084727176	-0.0184404484208222	-0.0606603278123008	70307440	-0.978851724192716	-0.414573782596019	-0.00803388683200786	0.0251506183370014	-161.811317591126	0.169439458514869	0.235667856283724	0.343562171272934	0.0198792263053038	-1.02251341594548	2863376808.59988	0.0157867563157388	-3.16681662656187	-0.00568983700928871	1.5005018	1.5256018	1.49233859607725	1.51649197479509	0
2002-06-05	0.0666599285714286	12.0447625072418	-291387600	0.837877371231483	40.6200099909634	0.219119931746777	0.0637915984397042	0.129516167397325	13282968.3925142	94.1468672050298	-4.8776634676187e-13	-494968.354999997	-0.0102449423076929	28.8706201639377	277.396297154395	93.4210230582064	-0.146631	-0.0245880766048332	0.4	-0.807042619542621	-0.0960302403612495	101.368733335621	-0.0297934847440469	-0.0207110556854671	-0.105395848425893	70736610	-0.773137100570708	-0.192279424903095	-0.00730168774635404	0.0251477250845708	-149.99519420307	0.162122628768517	0.211152780445322	0.29942570766373	0.0346069260085056	-1.29975362412017	2900898299.4151	-0.182649675514764	-2.55204363104391	-0.00263814811369351	1.4843658	1.5208635	1.4798200640515	1.50527216119598	0
2002-06-06	0.0691599285714286	11.8525673082986	-356386800	0.965166890867638	37.3684146523122	0.124813982295736	-0.043195526290942	0.141815889234916	1383563.84904957	92.2487654420313	9.62146457187153e-12	-1298441.61509999	-0.0188152628205136	28.8216296394477	271.164236278201	88.0063263660609	-0.1652	-0.0334592110002066	0.3	-0.670394076440684	-0.110132588266116	101.753308938336	-0.0364660628406588	-0.0238620571165054	-0.156789144532332	68528040	-1.10311323589721	0.135490257109858	-0.00886441352974457	0.0255214201893333	-130.97822846048	0.0348331091323621	0.152379556674335	0.250410324000598	-0.0436819779781911	-1.69494902579198	2849007526.31393	-0.125169010100614	-3.70103005908438	-0.0249565011902844	1.4582412	1.5070328	1.459522042701	1.48957285916035	0
2002-06-07	0.0690643571428572	12.8538170421942	-509481000	0.880058164876703	33.4544252077262	0.0933362000961027	-0.106903350144009	0.170847607903331	-6575806.29405403	89.605386591179	-3.77417373388411e-11	-4890349.68449999	-0.023453333333334	20.3289837678254	270.100126494364	88.612905124141	-0.131903	-0.0341163116721284	0.2	-0.561697663587324	-0.0919053743238075	102.313496522065	-0.0449402887759927	-0.0280777034484029	-0.219965701112179	73375050	8.15972336794196	0.95142663307476	-0.0107474431097158	0.0264046869855412	-179.49089011968	0.119941835123297	0.141566982823989	0.214129210275062	-0.00355747207815671	-2.25129560215073	2838394936.12222	-0.127467660169156	-5.07871124401651	-0.0348975551981751	1.4339094	1.4828291	1.42976902846733	1.46788015749483	1
2002-06-10	0.0693090714285715	13.7835489379544	-440087200	0.861758379958127	34.2352143478388	0.0911610397281341	-0.0048824754171119	0.1912681731856	-16823968.0020685	90.288136125062	5.39283263058086e-12	-3547294.00549998	-0.03316467948718	26.8674756292185	267.329055587792	89.5746103943892	-0.181848	-0.0354170813916863	0.3	-0.650806828988485	-0.124176836486635	102.669310330281	-0.0514820357932237	-0.0327585699173671	-0.284514012274828	73902290	6.36075298264131	0.0279870157715791	-0.00970934110520016	0.0266868378635859	-133.671226805897	0.138241620041873	0.140458528563284	0.189572316371136	0.0422309529475796	-2.64220841188658	2807861975.00894	-0.195608663315119	-3.42450940510706	0.00373099970693391	1.4155966	1.4657329	1.41164101897822	1.45106285613213	0
2002-06-11	0.0677275	15.412027379779	-527461200	0.988480540756698	29.4846801661719	0.00337568520666003	-0.112299480938365	0.219687841949256	-42621588.2220297	86.634376794276	-3.23424313354086e-11	-2675524.1352	-0.0508388717948727	26.7082089797503	258.173304318187	85.321105099895	-0.302226	-0.0413510142463315	0.3	-0.710311271225536	-0.207578106820297	103.314884262572	-0.0583085715014375	-0.0378685702341812	-0.360483370264186	74950890	6.68562685359804	0.218168764569665	-0.0094055771354926	0.0261912432400266	-146.503676607816	0.0115194592433015	0.0974788387899564	0.158874490510743	-0.0253124646516164	-3.28449275990619	2727262226.50932	-0.0749359351706705	-6.29005024643971	-0.04865006775859	1.3858862	1.443194	1.37778534598548	1.42542851865356	0
2002-06-12	0.066503	17.2655116043117	-659640800	0.968573087956635	27.9685402893626	-0.13148433591557	-0.0730917633689366	0.246693160222145	-71878829.9564714	86.0735595307293	-2.10002548729153e-11	-4419041.1986	-0.0661980448717958	25.6858862480248	244.686967507979	83.0165422326109	-0.259965	-0.048868219783076	0.2	-0.284741097408099	-0.184061748366748	103.913148252863	-0.0655459121551731	-0.0434040386183795	-0.443348652298203	74978540	11.0525723309443	0.597561655778396	-0.013315782365722	0.0226293434813757	-151.741219517811	0.0314269120433649	0.0754615298744259	0.131070170298637	-0.0357557509739966	-3.89660544969792	2644036849.31382	-0.0940461511812847	-6.05565146139528	-0.0182499973599056	1.35220600000001	1.4182859	1.34731756399032	1.40014733344382	0
2002-06-13	0.063952	19.3484556151615	-747661600	0.968827909767873	25.8414087286204	-0.14897521152918	-0.0648842628870628	0.273639367575986	-89415401.5752769	84.759363251859	-2.22542270349735e-11	-3115713.79839999	-0.0826737371794881	16.7218462255745	239.752528636352	83.8626282071047	-0.284298	-0.0529279936856771	0.1	-0.0547026072593165	-0.204756846951001	104.549741504216	-0.0842939189124676	-0.0515820146771972	-0.532529487454525	75181750	10.1188891861884	-0.0480082251026488	-0.0177971297698007	0.0179832316873748	-153.799080309192	0.0311720902321268	0.0606983833269929	0.107612907974756	-0.0331306659685329	-4.5471664999744	2598053857.88519	-0.115931168387353	-6.30545062869789	-0.027758509535481	1.3186538	1.3884475	1.31526670932688	1.37305963645404	1
2002-06-14	0.0697513571428571	22.0371802572667	-641436600	0.664314508987084	31.5497007100362	-0.103128936486412	0.0983014075384654	0.297594005959735	-63995681.7153006	88.1656038223349	-5.81418379383388e-11	354540.655700016	-0.0928612692307702	16.0170260932882	238.111866414275	87.7346110873657	-0.248441	-0.0506540832082396	0.2	-0.220856312042516	-0.176500941737893	104.712645412455	-0.0979549251499701	-0.0608565967717518	-0.610143544078057	77654850	10.8885077429755	0.938816007851063	-0.01282819771137	0.0205363217086659	-132.235747253944	0.335685491012916	0.152360752555634	0.122528856168382	0.212024545330138	-4.81566557587203	2679728433.84263	0.142488941278127	-2.00701979152803	0.0282559052131088	1.30200560000001	1.3679575	1.30585180621792	1.35741642982603	1
2002-06-17	0.0698023571428571	24.145387073937	-560284200	0.597778675187334	35.7354699892829	-0.0501840098327986	0.198013372650116	0.300172532113486	-30938581.2435699	90.987618534356	4.70486181185028e-11	3047648.77130001	-0.103401724358975	21.9500104161492	238.606408200967	90.1667733881063	-0.234353	-0.0486945488096632	0.3	-0.395872866403192	-0.16397821689727	104.558898004238	-0.104112700138434	-0.0695078174450882	-0.667420991781731	78756300	9.12628776245749	0.773883063362732	-0.0107618141839697	0.0225230464844551	-76.5772008284722	0.402221324812666	0.235647609974645	0.160235107437136	0.386472615049662	-4.81628797280249	2742154925.55387	0.101953697465021	0.842812934172849	0.0216546814676404	1.28996780000001	1.3527822	1.30896653747861	1.34973998803948	0
2002-06-18	0.0678635714285714	26.1023023109184	-648624200	0.651891609664502	33.7646297278027	-0.0761418162493508	0.173137673294124	0.302801616215317	-24721275.2928109	90.1767780035378	3.00839160629394e-12	40180.6188000045	-0.112403044871796	16.4966288044374	233.898261540303	88.6884160730501	-0.201698	-0.0388369249154189	0.3	-0.353848639043696	-0.145249374884447	104.542908270008	-0.114771492435477	-0.078560552443166	-0.712747885640763	79799370	8.28583513573611	0.465740147612479	-0.0121180487571544	0.0223964791133229	-70.5609988776423	0.348108390335499	0.273134536761596	0.197868250545289	0.423667109194209	-4.9122743552486	2703054677.68258	0.0367510890925284	0.016550252885511	-0.0191698572424616	1.28599780000001	1.335942	1.30271902498574	1.33891889930503	0
2002-06-19	0.0785074285714285	29.0712983356201	-1075991000	0.964338314832998	23.1036527979099	-0.101887392910573	-0.117334237396473	0.360652938403508	-57878498.14849	77.7192576595345	-2.34763825009336e-11	-42560584.4076	-0.126502153846155	9.71105344754932	237.937818689973	77.2563192160831	-0.370739	-0.0417650870209766	0.3	-0.155982216768658	-0.291325957719173	105.873282587893	-0.147760069940441	-0.0924004559426209	-0.793225698784661	97655320	30.808881273617	2.16390990696368	-0.0235142000859309	0.0423933272364625	-188.233420194024	0.0356616851670021	0.193976919563398	0.196571140217992	0.18878847825421	-6.09429256581844	2560599077.68258	0.0838919163148431	-12.6084760713875	-0.162957070698976	1.24796340000001	1.3000847	1.23388268332383	1.2947900085223	0
2002-06-20	0.077385	31.8367958020392	-1175150200	0.956660334825283	23.0777670697941	-0.149124228603302	-0.0217562750541248	0.404341281719059	-74334317.989872	78.9662063169722	-5.38911871011458e-13	-41489302.1116	-0.135823628205129	9.84958951187521	241.679618113747	79.9532644463143	-0.363056	-0.0418333683419128	0.3	-0.178989626040502	-0.286220120945482	106.837342774923	-0.176634910714253	-0.109247346896947	-0.888837978003776	98977340	25.5675441113113	0.0817678540764142	-0.0208995071651795	0.0426132870899927	-158.73084617553	0.0433396651747169	0.143764501433838	0.178968927289941	0.0733556497216315	-7.00043058263556	2530191638.3934	-0.0230126581570371	-10.3875501047184	-0.000584000235598139	1.21684440000001	1.2677491	1.18777845554922	1.25856818879097	0
2002-06-21	0.0765176428571428	34.4152059068717	-1286444600	0.989815030495487	22.3754734137625	-0.235324529510728	0.0141838266012381	0.429931940655228	-98760464.5804491	79.2904032090904	-1.86307666872732e-12	-958145.52959998	-0.146384570512821	9.68336116751476	241.49908562395	78.4450899202769	-0.375861	-0.0539391455793412	0.3	-0.18293137791745	-0.298894354100992	107.619750085047	-0.204224379120849	-0.128242753341728	-0.990146559534255	99924580	21.8640914007439	0.638418112607436	-0.0207892880304082	0.0426268699413464	-140.084870806879	0.0101849695045134	0.0992379907907296	0.15239194845687	-0.00706992454155198	-7.77360517116216	2437973098.5534	-0.0787863430480317	-9.62722514024572	-0.0153123812692032	1.17522440000001	1.238615	1.15149297036615	1.22590524537443	1
2002-06-24	0.0773850714285714	36.4705824750613	-1178461200	0.905372395439913	26.2781870450533	-0.209472539876276	0.107368036764335	0.446427263736659	-96544974.3342462	82.60385446906	1.53230429862364e-12	525530.210800027	-0.152923160256411	15.4636986476818	248.263080032828	84.4085143281983	-0.313112	-0.0690960764037118	0.3	-0.280168138804943	-0.249318532058267	107.882607436755	-0.226637888419245	-0.147921780357231	-1.07991747425664	103246570	18.5179953979184	0.216582168077164	-0.0186036766543148	0.0442163191470388	-108.726566077716	0.0946276045600868	0.0977011953805153	0.134161697431419	0.0247801912787086	-8.15406613185053	2449503539.35153	0.0421922036402809	-4.97071299421825	0.0246193208524405	1.13334800000001	1.2116579	1.13626664691076	1.20407047348817	0
2002-06-25	0.0791197857142857	38.3791464312374	-1253761600	0.924716737748544	25.8450880144373	-0.224682587547244	0.133897613116893	0.459821970644815	-93350667.3011918	83.3455093451017	3.80398345161523e-12	1138582.18180002	-0.156272506410257	19.6367752389821	254.580138407652	85.3161036146339	-0.272772	-0.0873201294773591	0.3	-0.276554023703397	-0.221976026740932	108.027447250005	-0.24663766623315	-0.167664957532415	-1.15661986974923	105140140	13.5708916313098	0.0834648731213932	-0.0189530988663861	0.0440995909375144	-91.2950265160177	0.0752832622514557	0.0902285510041621	0.119517315289	0.0316510224344867	-8.43654868399987	2425628179.04694	-0.0598201819189074	-2.65048606412174	-0.00755504988083992	1.09480140000001	1.1903996	1.12334143127384	1.18469238739941	0
2002-06-26	0.079732	40.4672606850031	-1393499800	0.895561478258862	23.9181216692407	-0.226107502384571	0.113945368190904	0.472496507758287	-88770368.256712	81.9570316298975	-2.74495878936468e-11	-2952947.34349998	-0.162408820512822	19.1254778046767	257.512053844089	84.6980214440142	-0.315673	-0.073775326164972	0.3	-0.275031928845923	-0.260736518831702	108.336212068176	-0.261700461138292	-0.18647205825359	-1.2273808857639	109354630	13.7572868884299	0.765395709848917	-0.0196513416592006	0.0442737350997181	-96.9762848061781	0.104438521741138	0.0949652079164873	0.111333279498162	0.0622290647531373	-8.83304395306175	2407493917.76299	0.0495157605067991	-2.68525475307404	-0.0350294923838357	1.0875018	1.1677326	1.10213162084923	1.16196868059952	1
2002-06-27	0.0781948571428571	42.4062239206427	-1330585200	0.80798270614314	28.8559066678468	-0.223302117298437	0.196987347180428	0.469117034821451	-70131812.5558395	86.0030569612949	1.08347893016883e-11	-1612315.14009998	-0.164789525641027	23.9634892252745	261.070313569402	84.8756276116492	-0.217706	-0.0597974129912002	0.4	-0.480415834562049	-0.181735807278062	108.149648053908	-0.277328502589193	-0.204643347120711	-1.27868359022926	110045670	8.58130535691119	-0.889275166970503	-0.0150005147151404	0.0460031711891448	-73.3296844286203	0.19201729385686	0.127315903229945	0.11666082074209	0.148626068205655	-8.8494441352896	2439321157.35189	0.0802693708598099	0.372610387607582	0.0303506437950491	1.0868614	1.1518529	1.09887708056615	1.14931401139961	1
2002-06-28	0.0798275	43.2998504858413	-1263120600	0.695424960555463	34.7571726357007	-0.162082626577125	0.290592213878659	0.453428815371635	-42268002.2906904	90.604654824932	3.07989006160269e-11	2452830.31910002	-0.16118160897436	23.1729172807953	264.980554270558	86.2707155435388	-0.151753	-0.0351645733508094	0.4	-0.718681204389053	-0.125527901555062	107.501543212967	-0.292739463928485	-0.222262570482266	-1.3001590913838	108850210	4.55171575706638	-0.0281945104812102	-0.0125041187615555	0.0480030595348331	-41.6112530430704	0.304575039444537	0.186402281968142	0.139907974484107	0.279390896936212	-8.48942599862433	2490330527.36435	-0.181359419752564	3.63587040580084	0.0379579083630948	1.09800280000001	1.1366136	1.1107943870441	1.14664400932695	0
2002-07-01	0.0774805714285714	43.8942319021699	-1318793000	0.766729088440738	31.9069648818509	-0.180780836719065	0.236620259174309	0.440269563801191	-41818840.8430767	88.5543548268766	9.38237444406908e-12	249175.082100019	-0.154417307692309	23.846819194015	262.789188846658	84.6649884051141	-0.158797	-0.0173623334906043	0.3	-0.798436251239734	-0.135727300382676	107.25941114904	-0.305142505164756	-0.238838557418764	-1.30902722970723	108694950	0.245476323050142	-0.450713243110059	-0.0117727561167825	0.0475045036007398	-40.81235921974	0.233270911559262	0.202025158498515	0.16061370248891	0.284848070517726	-8.40348210142939	2435999087.9149	-0.148443308415627	-0.428021345464341	-0.0379579083630948	1.0953136	1.1143308	1.1046522580294	1.13677564399478	0
2002-07-02	0.0750315714285714	44.5696248107226	-1395090200	0.7829666880332	31.4027312961499	-0.209320257220082	0.24504945679928	0.427855987945812	-43515055.7854829	89.2847353364513	-1.00974393490194e-11	-1469519.49059999	-0.15352253846154	25.0188117754295	264.494741045763	98.9485591264448	-0.202338	-0.000937632520889953	0.3	-0.865110747112647	-0.171042322152031	107.023299144298	-0.316345312459775	-0.254339908426966	-1.30767711910925	108162040	-1.60927000175191	-0.549525363491956	-0.0109834550381736	0.047483362125374	-55.2682407243255	0.2170333119668	0.207027876321277	0.176085093766366	0.2689134414311	-8.30381615368534	2410566687.9149	-0.183727828353185	-0.810028329959021	-0.00705911655624661	1.09275220000001	1.0937768	1.0979961720196	1.12730443599573	1
2002-07-03	0.0763580714285714	44.3416308448073	-1345332800	0.653911727583313	36.8645583625474	-0.212007080636078	0.341292237271959	0.402619316642334	-30339777.6464729	93.7775231964686	1.49557587414134e-11	678603.300900017	-0.153641570512822	28.9685009699494	271.862306004427	102.571538103453	-0.191453	0.00816628049681113	0.4	-1.74497964606292	-0.157320626311824	106.385434172063	-0.323681826885946	-0.268208292118762	-1.28537649316934	107186380	-5.43122146801974	-0.570413953923143	-0.00645585873502793	0.048803626021287	-31.5685081596715	0.346088272416687	0.253381341686414	0.201850509739715	0.356443005579811	-7.87020731529792	2446412869.26012	-0.116786567083769	2.35224145594441	0.0353763773078476	1.10555840000001	1.0965301	1.10657844801307	1.12665690217832	1
2002-07-05	0.0703721428571429	42.6314527801043	-1304920400	0.402148988614061	45.9121372445148	-0.171277053776582	0.52974151148217	0.362078076489348	-11076974.8423605	101.059655044253	1.17087709267452e-10	2511388.96470002	-0.148260506410258	33.3009259301698	290.393784982343	111.216566165117	-0.090284	0.0178388654220081	0.5	-3.18153395085753	-0.0725442911662485	105.153196394765	-0.325676224817796	-0.279701878658569	-1.22595813948118	105957040	-9.51545290039656	-0.966422817434292	-0.003659605939638	0.0519879396260781	53.9891541072757	0.597851011385939	0.368204564919589	0.25730186146634	0.590009971826087	-6.91733735421228	2486047333.55218	-0.0402493734865536	7.01436977572823	0.065606477903114	1.12707280000001	1.1069671	1.13769896534204	1.13998110178226	0
2002-07-08	0.0714150714285715	41.0434302914515	-1357721400	0.556592676786033	41.9414474239091	-0.182121849367653	0.440945887515572	0.335977708406762	-6428891.46069956	98.0188946105448	-8.46073038389239e-13	305613.249900021	-0.128267282051283	27.6938818346402	300.752698051502	104.284897821876	0.0569870000000001	0.014495929558408	0.5	-1.42806860571451	0.0506793093107251	104.552446951244	-0.326679976754888	-0.289097498277833	-1.15551212656537	100942380	-11.6678455373801	-0.429798738457833	-0.00800569832614626	0.0522303752449358	66.0970602611372	0.443407323213967	0.393272151017715	0.302625291316798	0.574565870419548	-6.41140360767259	2470718677.61878	0.0142605030420948	1.92413384810119	-0.0397334702220025	1.13078640000001	1.1143946	1.1428649768947	1.14238399236731	0
2002-07-09	0.0725375714285715	39.7395279172689	-1414408800	0.430437582917256	39.5212210216848	-0.191546344469713	0.379647896706415	0.299626597081005	-16773351.7613983	96.4432366231399	-1.64547374019624e-11	-2105153.84729998	-0.111816237179489	28.5758748830675	304.620292781722	102.275371734256	0.0268930000000001	0.0182492975490843	0.4	-1.3759103961055	0.0242506021773372	104.283440601654	-0.328049670850666	-0.296887932792399	-1.08711053893578	100307060	-12.9623794177478	-0.443641042351913	-0.00855311569992783	0.052394229535172	86.4523913648847	0.569562417082744	0.452035573039391	0.352428718557662	0.651249282002849	-6.15426131058872	2423592961.65885	-0.0295074375460582	-0.614146607451353	-0.027012707368986	1.1368054	1.1160595	1.1360643179298	1.13876199375507	0
2002-07-10	0.0621487857142857	38.7190980824193	-1466129000	0.50446170530175	38.4750966946867	-0.176361932288181	0.355720802018231	0.269675098995279	-31589756.3496804	96.1180815697061	-1.30017161959929e-11	-1218856.04049998	-0.0955417500000013	38.7674493474228	305.929712361744	104.652584853243	0.0300940000000001	0.0214245460035062	0.4	9.51789002893972	0.0275107411698548	104.121225783027	-0.329708157708307	-0.303451977775581	-1.02429927516332	98524370	-14.4733020042372	-2.11179424000644	0.00133205812443688	0.0330710615235626	44.2552845183022	0.49553829469825	0.466536480259011	0.390464639124778	0.618680162527475	-5.97871062808758	2379743261.09581	-0.00381154016186891	-2.04543089157543	-0.0120522422766856	1.14167180000001	1.117212	1.1270482119532	1.13335363125415	1
2002-07-11	0.065363	38.1445000379337	-1372709800	0.159024975640906	45.6985416940748	-0.0919607752817855	0.591352221938866	0.24562631322521	-9748018.78210068	102.063623802294	-1.14172194313373e-11	2583333.34490002	-0.07901262820513	48.0897786432111	309.563279721159	107.26852123094	0.0659529999999999	0.0198554369992456	0.5	3.24623826815318	0.0579311505708203	103.414237401728	-0.326116453269207	-0.307984872874306	-0.947120627983944	96586350	-11.0216408865205	-0.0596297478046601	0.00541537397274995	0.0361977036666701	70.8645171944653	0.840975024359094	0.591349328292372	0.457426202180643	0.85919558051583	-5.34057933518566	2466393736.76106	0.0104333151660316	2.18711110813956	0.055039730253406	1.1512766	1.1284175	1.14195447463547	1.14033788011703	0
2002-07-12	0.0695977142857143	36.7379890973046	-1483582800	0.472225522046558	41.4715668698535	-0.105547270316823	0.426679844198115	0.229390504700894	-21684843.1094775	98.2135309618923	3.14586719309479e-11	126818.757100013	-0.0642075705128222	58.8183721190703	298.404836127122	98.8148548997073	0.0236909999999999	0.00372171462539891	0.4	5.35430539609645	0.0213568204740277	103.244422147907	-0.323933956863883	-0.311174689672222	-0.877060662593121	97728960	-6.46484535826661	-0.0037935404146765	0.00341722380530116	0.0381428163288595	70.9896759302564	0.527774477953442	0.570157711512729	0.495003371958005	0.720466390622176	-5.12943231368682	2391753358.70715	0.140565361255936	-2.18788190297004	-0.0441293799776325	1.13552500000001	1.1312989	1.13503031642364	1.13685499282302	1
2002-07-15	0.0734752142857143	35.9674859367821	-1409584400	0.234111345829051	46.3427908132762	-0.127223052209813	0.632036915798784	0.214160542410087	-11787129.7015147	102.791062611561	-4.86981558587751e-11	-1098518.23409998	-0.0455646987179503	50.0394658626963	295.05381325788	106.858128396291	0.107572	0.0033188608278195	0.4	4.18393731635652	0.0966825096435363	102.690595826716	-0.314629729412815	-0.31186569762034	-0.799044270988747	96117630	-6.55860645441112	-0.377934040258094	0.00457395422941911	0.0390792960466774	53.495516296732	0.765888654170949	0.635401359065469	0.541802700993826	0.822598675208754	-4.58716187661938	2435160868.64716	0.310168178013101	2.3198993587789	0.0402961967856729	1.13834240000001	1.1345644	1.14578154428243	1.14238753958247	0
2002-07-16	0.0741895714285714	35.2378720794736	-1521276400	0.356473997097302	44.3022499748024	-0.184605218040076	0.58223490928039	0.169562689952315	-21528285.0061865	101.471519056838	1.85645742040612e-11	382689.532400027	-0.0325778717948733	51.9954799306992	286.798625207547	105.430982664075	0.0512250000000001	0.00252194967058949	0.4	5.33004170974296	0.0458272435367521	102.424747371358	-0.30825759638106	-0.311144077372484	-0.725011434285905	97644610	-2.86408704377931	0.394259636221744	0.00366186495756866	0.0395298568018011	74.7024261410454	0.643526002902698	0.638109573677878	0.57390499188851	0.766518737256614	-4.27358705615599	2381640835.16411	0.2844408568676	0.384079422937224	-0.0205046223117351	1.14256840000001	1.1396869	1.14505202952162	1.14260671420384	0
2002-07-17	0.0799500714285715	36.1917337869325	-1825147800	0.870788041243895	34.4550627548834	-0.166260373131467	-0.247021441487174	0.135189584668737	-34485088.3271127	89.9568495579724	-3.66982226576769e-11	-23017794.2533	-0.0293229935897452	45.8688402056277	273.407948155151	89.0598651115068	-0.133825	-0.00925386689218941	0.4	-6.11405087102316	-0.125502048287158	103.343767825487	-0.308335473582517	-0.310582356614491	-0.698290549166181	108421180	14.9392548615916	0.77683391361305	-0.0027979150032749	0.0517368527674152	-254.629175737642	0.129211958756105	0.468477035370621	0.538762339715881	0.327906426680101	-4.9790819631412	2342531760.8395	0.418179840696825	-10.5579293278198	-0.133371383460815	1.120926	1.1312989	1.09696935301441	1.11682440253042	0
2002-07-18	0.0797650000000001	37.2740154486194	-1965013400	0.936490942096099	32.2402037973173	-0.146231516793725	-0.244972490529296	0.177954566841995	-52109599.7083392	86.8054533407258	-1.39970959049258e-11	-24560592.8113	-0.0268971730769247	38.775050389062	251.054654630424	79.9893327999733	-0.132544	-0.0337212228338063	0.3	-2.17366823345084	-0.129353161550396	104.353714081894	-0.309737206383862	-0.310413326568365	-0.712764559220258	94046120	15.1596527500847	0.798903710274772	-0.00792384345655516	0.0517053351954285	-236.24411200207	0.0635090579039011	0.333487709548381	0.470337462993381	0.0597882026583816	-5.79126374873247	2285548942.15928	0.30549210258251	-12.270784439955	-0.0418090216263334	1.0785374	1.114907	1.05125423534294	1.08827887479761	0
2002-07-19	0.0788466428571429	38.3914970253423	-2061315200	0.892390915906973	32.1359183185505	-0.112636861596608	-0.0924118979624604	0.216848780080664	-45940034.3397052	87.1744006744597	-1.023632679763e-11	-2958344.02289999	-0.0248284487179502	32.9750514282171	239.950632609066	83.0649923647044	-0.126781	-0.0428554245528308	0.2	-1.34417547353142	-0.124297459080223	105.087111191413	-0.308469882815873	-0.310024637817867	-0.750378871547319	93903250	12.2376745154175	0.355883994353228	-0.0108301949202928	0.0499991864722933	-176.274163215537	0.107609084093027	0.258194834396596	0.399623253461119	-0.0246620037324498	-6.40413592783214	2318652290.91896	0.153908258505404	-9.49788917250213	-0.00200341408607312	1.04588160000001	1.0907033	1.02013715689529	1.06457417028896	0
2002-07-22	0.0775711428571429	39.3869227683123	-2169039600	0.901363594957642	31.9873687227625	-0.0596918033829019	-0.00729782615616453	0.246973142951285	-37335646.362808	87.432991273925	1.48737572453414e-12	-230438.97309998	-0.0274840576923092	39.1272694044087	238.727447947124	85.1112241561637	-0.168401	-0.067189892268322	0.2	-1.76427660478957	-0.162350965066897	105.595377677505	-0.310255276445421	-0.310070765543377	-0.798698716929447	93724750	10.5829099263574	0.66009160129153	-0.0083606957969449	0.0494448194858122	-130.755958462716	0.0986364050423583	0.205008691278517	0.334751732733585	-0.0544773916316196	-6.85438871349776	2326081111.57116	0.0512560014080841	-7.31958446178104	-0.00267712867882663	1.00349320000001	1.0709178	0.99853877126353	1.04471377569096	0
2002-07-23	0.0794078571428572	40.382182262376	-2269012200	0.992568306010929	30.2908047961182	-0.115031838781238	-0.0258914198900068	0.276379561109041	-54566879.8865943	85.4973632265776	-2.40823210559694e-12	-1578246.34239998	-0.0364032371794887	38.8285532980032	240.011450933135	83.5450525510903	-0.273412	-0.0950379978672548	0.2	-1.5126555792543	-0.258582567994472	106.168827032532	-0.316287024411158	-0.311314017316934	-0.857408765503098	93324210	8.62607326694303	0.270259908073889	-0.0100126005930858	0.0497822642514585	-111.517731046141	0.00743169398907096	0.139149692182035	0.269551052549735	-0.121653028553365	-7.36822666177838	2234798429.7694	0.0129078080522953	-6.47419899818208	-0.0306251250244606	0.960080200000005	1.0513243	0.974535180842353	1.02322545283806	1
2002-07-24	0.079612	41.4599592344936	-2167363800	0.779109170987998	36.2022639521345	-0.0493304562818819	0.177946286900916	0.297674586790149	-29557811.1909428	90.3283761224909	-6.11519068672012e-12	935370.332400018	-0.0382461089743606	40.5183234318991	242.050422567895	83.0601134867256	-0.179926	-0.0871344022084767	0.3	-1.65010108776126	-0.169630800856439	106.057780331242	-0.316338253302607	-0.312318864514068	-0.902139114796263	94641610	7.10864080762781	0.714360603403239	-0.00898116704242376	0.0509451500432606	-85.6337028639715	0.220890829012002	0.166396737792024	0.235166280963831	0.0288576514484091	-7.35103109272711	2332253902.9559	0.0208274842743603	1.14232329096624	0.0492182969160304	0.954573600000005	1.0377498	0.974113787228236	1.01414282504932	0
2002-07-25	0.0797459285714286	42.5491377068373	-2287202400	0.92141503236129	32.759642998169	-0.0565088642506122	0.0669837273818823	0.324007188898862	-25113246.0820463	85.8953944974612	-6.72418331405747e-12	-847203.808499984	-0.0409017948717965	35.8505493141007	250.451391539436	82.0102356263301	-0.202979	-0.069746972442629	0.2	-0.575309847073092	-0.199468013803364	106.397547330844	-0.305598849202407	-0.310974861451736	-0.949801667183703	93646630	7.13978578427618	1.0870091688911	-0.0177719230899598	0.0471529464771988	-89.0101931627739	0.0785849676387104	0.137126147740919	0.202486236556194	0.00640597011037009	-7.6813599758395	2301656623.71905	-0.0672886394830615	-3.08217060364509	-0.0568499203159114	0.946505600000005	1.0125215	0.955903858152157	0.99693212958581	0
2002-07-26	0.0784479285714286	43.6813493775408	-2339128400	0.884160862997366	32.6799990385548	-0.0605644308342883	0.117420027422891	0.35163245550758	-14364996.9041147	86.4793244960049	-2.24454095443515e-11	-3256112.02909998	-0.0499564102564121	36.1731680879406	260.997799731926	78.6615767885108	-0.190812	-0.0571700993153532	0.2	-0.691559292955781	-0.188808826503364	106.566263605376	-0.295734783879145	-0.307926845937218	-0.994212619286439	93097200	2.07658531967798	-0.0167105018040914	-0.0150888971902183	0.0469230332561747	-87.5090917630878	0.115839137002634	0.130030477494824	0.178334316869071	0.0334227987463311	-7.88237853459544	2326553578.74657	-0.18578776271361	-2.50424192830244	-0.00139305497668539	0.938565800000005	0.992223699999999	0.943337238768105	0.982617924206572	1
2002-07-29	0.0779376428571429	43.6937807716984	-2270388400	0.75339886299136	38.1852708555761	-0.0590927425559717	0.26239144589651	0.36232704804203	5667831.93874574	91.3236524219386	2.70681000727378e-11	1463271.53000002	-0.0623111282051299	40.3516229408674	279.691452949901	84.0985385534889	-0.210022	-0.033860213754071	0.2	-1.32125558990963	-0.197518802149143	106.148567005094	-0.281999569734595	-0.302741390696693	-1.01717786351289	93160970	-0.828181628577117	0.192779307605221	-0.00979812056445353	0.0496175964866605	-53.6158500433566	0.24660113700864	0.16888736399943	0.17518533257919	0.156291426839908	-7.61886270375741	2380227783.03486	-0.295960633201792	2.04959737019971	0.0463297546076267	0.939846400000005	0.971669799999999	0.949473159178737	0.978822847078104	1
2002-07-30	0.0780907142857143	43.0084748799176	-2181678800	0.674556053084429	41.302164358931	0.00949156695635361	0.350900092543231	0.36717950004009	33805233.5755796	94.2837408123267	1.4071345643538e-11	2660950.73440002	-0.0699127179487197	45.0803435405643	305.870373479441	98.7204287752647	-0.133184	-0.00416944811919983	0.3	-2.03021131708372	-0.126458091479828	105.472505161668	-0.269370064370396	-0.296067125431434	-1.0137737422997	94812830	-1.53549790668048	0.539519692575613	-0.00699260903196462	0.0505857160937635	-32.4783769158471	0.325443946915571	0.221072891638143	0.190481185598841	0.282256303716748	-7.12097793947679	2453997534.40023	-0.252876473143863	4.23330865816921	0.0269313306916823	0.952140400000005	0.956110299999999	0.962314772785825	0.980491056700267	0
2002-07-31	0.0737030000000001	42.3721194089784	-2259353600	0.707248805480226	40.3926564423749	0.0386292368248493	0.338766809540595	0.372084603884898	49731694.3644948	93.7259716839965	4.8708023451621e-12	741662.628000021	-0.0808103076923096	43.9794763451121	336.631008708271	101.80116354665	-0.190172	-0.000873640976683636	0.3	-0.880772250954483	-0.177833679604533	104.984275342137	-0.257909213264981	-0.288435542998143	-0.994379693021796	94881710	-3.01048619776993	-0.184566011115752	-0.0118212399650606	0.0471608302109009	-23.3994935207742	0.292751194519774	0.244965659265354	0.208642676821012	0.317611624154037	-6.73783651704423	2483870848.83364	-0.290619749481144	2.17605520151049	-0.0110793913390321	0.952908600000005	0.953741099999999	0.967247181857216	0.979876682754764	0
2002-08-01	0.0694172857142858	41.901327556467	-2316592600	0.783822090022753	37.957157260212	-0.00428707672626534	0.281882970207019	0.375183895934645	39657508.0985346	91.6749115992477	-2.29772866402275e-12	-1265742.68939998	-0.0913754166666684	37.5329142964879	351.621999256851	98.9304762590784	-0.195935	0.00627921490044746	0.3	-0.994587950392604	-0.187936661736097	104.823094395715	-0.246689581475367	-0.280086350693588	-0.972643850091226	95255790	-5.98038783839205	-0.661149917900442	-0.0108908177629361	0.0466201815524797	-28.5803432165308	0.216177909977247	0.235369742835985	0.217551698826003	0.271005830855948	-6.59941552611244	2438245491.6531	-0.271045729001358	-0.459595171808587	-0.030607604443299	0.958543400000005	0.952524499999999	0.960717454571478	0.974018740435716	0
2002-08-02	0.0641112142857143	41.8798699936445	-2361357600	0.855041375891393	36.1701060773351	-0.0359743855434155	0.245710035473636	0.365370564900164	26329731.7666326	90.7121710392477	-3.53684103205629e-11	-1344572.96049998	-0.092500102564104	38.6496604955763	358.672218459021	96.8498192270412	-0.075557	0.0111392027934786	0.3	-0.502234557419722	-0.0784982270531911	104.841358207862	-0.240568921361877	-0.272182864827246	-0.955109462519677	95473420	-9.5987687547128	-0.502616887262679	-0.0155170985884117	0.0442135007145616	-68.7612014629711	0.144958624108607	0.205232703260192	0.213445366970733	0.188807375839111	-6.60276531036191	2417355381.14761	-0.219159909630967	-2.91156082829486	-0.0239329487779089	0.959952000000005	0.949258899999999	0.948893969714318	0.965151151265585	0
2002-08-05	0.0629377142857143	42.062750777006	-2412363800	0.900170490345058	33.910439017664	-0.0532448556181409	0.18995096619504	0.358023435238474	5612593.25129604	88.9468081419832	-1.76973298246096e-11	-1252782.51489998	-0.0902754423076938	31.4779148331479	362.421457498777	96.6827769910893	-0.0640310000000001	0.00365202813464942	0.3	-0.490063078216989	-0.0690405748225214	105.068689424514	-0.240435619718656	-0.265833415805528	-0.948166825058427	95383680	-11.9677181884001	-0.783797889135567	-0.016341229279847	0.0444164926489232	-135.711346899474	0.0998295096549423	0.170098305391776	0.198996346444414	0.112302223286499	-6.77968792172542	2369144872.22024	-0.164288520879167	-5.63237669810118	-0.0323513693956637	0.946761600000005	0.943303999999999	0.931193646476212	0.952540578308206	1
2002-08-06	0.0564238571428572	41.2782334615711	-2344350400	0.469137436211303	40.4435794212585	-0.0231338421631224	0.343478374955562	0.344988909048406	-520940.788420677	94.5539205108184	2.0906105708581e-11	881969.453400019	-0.084110352564104	44.0435338720831	358.789245816368	96.9737103026803	-0.0140859999999999	-0.00757789478778839	0.4	-3.5022665843744	-0.0148142288140583	104.673030274863	-0.23336757204799	-0.25934024705402	-0.928976901502887	95949980	-12.0786575746165	-1.49689984100346	-0.00359333066912308	0.0356138874646635	-24.4383842370825	0.530862563788697	0.290353058190749	0.229448583693192	0.412162007185864	-6.4558729091854	2379199127.80136	-0.0453803263520434	-0.259316175337439	0.05222293192239	0.937925400000005	0.945032899999999	0.935401430984142	0.95095447316126	1
2002-08-07	0.0574252857142858	40.348085088717	-2260981800	0.274605539971949	42.7980404781129	0.0145309470526466	0.41793458728238	0.328086448895066	5090151.35274887	97.1275031802335	1.0505346377413e-11	2407131.84320002	-0.0785240897435914	53.8944567890094	359.863155805149	104.665769061778	0.00704300000000002	-0.0095876917153245	0.4	14.5791736326725	0.00734518694805394	104.114917009507	-0.224823835736606	-0.252436964790537	-0.893862777959964	97532400	-10.4663712037674	-0.517410221843907	0.000736696749534868	0.034387030973765	41.6093176876469	0.725394460028051	0.435366858803183	0.298088008729856	0.709924558949838	-5.97749451849177	2408088023.90216	-0.028287130175482	2.16379583058206	0.0194822870832856	0.934980000000005	0.943944299999999	0.944395953989428	0.953032750768303	1
2002-08-08	0.0572722142857143	39.4843758853525	-2204144600	0.123053997194951	44.9791605079975	-0.00855562562478396	0.497532068037155	0.298898112501492	17773730.3200116	99.8401618193425	1.05153562631517e-11	1265323.25780002	-0.070056410256412	61.2294679921325	363.233102656141	106.69459074454	0.053146	-0.0091143542820755	0.5	6.3082055962985	0.0557755967305119	103.463389668562	-0.218611925295329	-0.245671956891496	-0.841890642882015	95703300	-11.8311355266572	-0.527295969286392	0.00216285049461335	0.034677543467351	95.9813813615713	0.876946002805049	0.582559906803805	0.392911974754506	0.961855770902404	-5.39235504951161	2450017704.64394	-0.0894409012890404	3.9520218499218	0.0178052847579973	0.941383200000005	0.949963299999999	0.956155302659619	0.957876614264975	0
2002-08-09	0.0569607142857143	38.6823601965141	-2255573600	0.291444600280505	43.0164968825411	0.0314165290393331	0.457470352871954	0.258367027267893	21347031.4567356	98.69066842443	-2.17988654261214e-12	-2646.36959998182	-0.0648436987179504	53.9785586831463	362.317875189516	99.8668046103697	-0.012807	-0.00607606323989013	0.5	13.2534056341754	-0.0132460624203254	103.10862958211	-0.220216854118765	-0.24058093633695	-0.786321072583163	92731100	-13.455717200961	-0.739373898055181	0.000953206544648223	0.0351513591529194	57.6447920489589	0.708555399719495	0.624558404442368	0.470127451317127	0.933420310692852	-5.03004103853655	2450019144.62714	-0.123828908738903	1.68338809114611	-0.0198033622348069	0.948426600000005	0.954189299999999	0.957591535106412	0.95834704803498	0
2002-08-12	0.0551240000000001	38.0176497504592	-2300515000	0.297054698457223	42.9492569181165	0.02828046058078	0.490467491309123	0.203623562457728	29082625.1361837	99.6874329777682	-5.39273413823335e-12	-508356.792999981	-0.0522468012820531	57.0018545660721	363.095301036282	97.148374794281	0.04034	0.00752741687550204	0.4	4.62901884700665	0.0429372911892413	102.7984422268	-0.218151942263476	-0.236095137522255	-0.729379135002861	91278250	-15.4523824803978	-0.799536729523311	0.00305996240627697	0.0340084044260481	25.6879952240482	0.702945301542777	0.650687370142505	0.530314090925586	0.891433928576342	-4.69462125389821	2486788687.66731	-0.190429164455299	0.999428792605706	-0.000666566706344643	0.961232800000005	0.953997199999999	0.958335690070942	0.958615584755892	0
2002-08-13	0.0535423571428572	36.8280272875254	-2367982400	0.52156381486676	40.2385476852797	0.0257434713188109	0.295507262250095	0.0881662121037336	14039686.5817981	98.0939597230871	3.3155795984431e-12	-878368.772399978	-0.042490301282053	48.1634341073089	348.921692671722	95.6095104757694	0.016008	0.0111467408198315	0.3	-5.28837881551328	0.0172838050456539	102.765130407977	-0.21585186978167	-0.232046483974138	-0.681603745520387	89067020	-14.3374135912328	-0.409875281413839	-0.00244958719179672	0.0319246518950808	4.78252027750845	0.47843618513324	0.59327030847275	0.551299496774641	0.677211931868968	-4.59061389734713	2427498720.66055	-0.213378639429531	-2.35357405159529	-0.0270465411202728	0.959311800000005	0.948618599999999	0.950294460047295	0.95417856934573	1
2002-08-14	0.0520474285714286	35.5281784051589	-2268211400	0.196029102384292	45.599907184026	0.0890118142698999	0.818960035137552	0.073153375719009	21646087.0799332	102.151380646187	2.03837658237399e-13	988610.28910002	-0.0358778910256428	60.0418864157975	351.273301149994	102.499952514515	0.00960400000000006	0.0135909244425695	0.4	3.08432878040895	0.00993648422658835	102.338333308508	-0.209837649029234	-0.227604716985157	-0.626815581573981	78862000	-9.64933168975158	-0.183268277529475	0.00433729670805045	0.0298665401741926	50.1326485158475	0.803970897615708	0.663503838187069	0.588700943912117	0.813109626736974	-4.15118576604768	2482924754.77856	-0.122439235039321	1.0434632452528	0.0389824337885611	0.961104600000005	0.948042299999999	0.95731264003153	0.957300465828325	1
2002-08-15	0.0520984285714286	33.4984583009867	-2187691800	0.086836460893199	49.3149198573662	0.163007729525559	1.14867524823362	0.0799435078351413	36182148.6845822	104.895318822221	1.82601098428208e-11	2986877.41870002	-0.0307062051282069	66.7266089213273	364.282754917055	108.027694226515	0.011525	0.0122742868321924	0.5	2.39803326799461	0.011597491727126	101.719973334024	-0.206945829873139	-0.223472939562753	-0.558665608847297	75894700	-8.02739001911455	0.438681004926654	0.00650851871072481	0.0305158280692203	163.393210588147	0.913163539106801	0.746723738493646	0.641375208772627	0.957420797935686	-3.5269921920301	2532977396.75975	-0.0911472410392085	3.30905215910429	0.02859233819222	0.965074400000005	0.953228799999999	0.97138276002102	0.964977290223175	1
2002-08-16	0.0525576428571429	31.2751505717113	-2126385800	0.149365445630229	50.9545393014851	0.156631524789576	1.15614574231575	0.0949777652004555	43716117.8510666	105.9368060628	1.97421319936059e-11	1526852.57620002	-0.0216391794871811	66.5980026550604	382.581248676255	113.009367119413	0.035218	0.0138505646023486	0.6	3.10723776512338	0.0354086015338471	101.121302110295	-0.199400150652128	-0.218658381780628	-0.479763436831826	74144910	-8.75327160050885	-0.114453553987168	0.00403661630723741	0.0282656085020741	194.055319495944	0.850634554369771	0.781360677119021	0.688037031554758	0.968007968247548	-2.89289536733298	2550920897.09268	-0.0587181988974553	4.04744880776711	0.012731718467689	0.975447600000005	0.961937099999999	0.985031840014013	0.973586873818961	1
2002-08-19	0.0504147857142858	29.4681099081501	-2072246400	0.13018442512286	52.3649804744399	0.1565927763468	1.11056358152576	0.114426947115128	42567358.5854964	106.696966548145	1.38542492343839e-11	687226.655500018	-0.0115748012820529	65.4191961942543	401.925406681401	108.412435885346	0.075557	0.0136080851243899	0.7	3.82342924121459	0.0767112323757274	100.567910129369	-0.195143908294272	-0.213955487083357	-0.393375966608467	71465660	-10.0757439889165	-0.49380591170209	0.00285484245578679	0.0275552208230338	194.839181609015	0.86981557487714	0.810845643038394	0.728973235382637	0.974590458349909	-2.27517977830733	2549901233.82829	-0.0959507611309337	4.04777395905022	0.0106950263985812	0.988125800000005	0.974679299999999	0.997759560009342	0.982610169488241	0
2002-08-20	0.0506188571428572	27.3962966280869	-2118902800	0.1604404061133	51.7056213469888	0.241109637098696	0.991999214418701	0.124308501757498	42469227.4807177	105.72135650625	-1.02721170085991e-11	190096.692100024	0.00192919871794694	58.6086624418007	423.330088837873	105.855037225227	0.0934860000000001	0.0227446941882388	0.6	3.34910210960655	0.0962542484051956	100.194238424959	-0.189737453810098	-0.209111880428705	-0.307942224129787	68799850	-11.96488923916	-0.509720770707126	0.00332898030216512	0.0273545246436155	130.516088632358	0.8395595938867	0.820416959987829	0.759454476917701	0.942341926128086	-1.80244700692156	2566564567.08829	-0.20015345569722	2.56799301670209	-0.00438993274844058	1.00503	0.982170899999999	1.00475070667289	0.989177956854015	1
2002-08-21	0.0511290714285715	25.7414523671763	-2068295600	0.0696724631419778	53.5934655554517	0.203436530010477	1.03075825370962	0.13447515761753	48091354.5088453	106.790324694922	1.05426934309747e-12	235675.213200019	0.0175798525641009	65.0289584819824	444.860421008842	105.359435893981	0.136386	0.027571579125366	0.6	1.97130796330974	0.141718021114849	99.8009363408626	-0.172728803517013	-0.201835265046367	-0.222401590090993	66247790	-12.9531401353232	-0.123141625574235	0.00642488617546962	0.0256759415536762	113.66677581055	0.930327536858022	0.85705381894456	0.791987590926654	0.987186274980372	-1.30412004019184	2601798313.32516	-0.203888771550086	2.24100424461008	0.0131124033139896	1.01719600000001	0.989150299999999	1.01389347111526	0.996996328335103	0
2002-08-22	0.0503127142857143	24.2598939898583	-2132873400	0.134942750538084	52.0290252846185	0.238975119482591	0.905200338129231	0.138467297014158	46863845.2886934	105.235469089618	5.85245121388471e-12	30129.6100000183	0.0233056730769213	70.8813263415543	461.381261432749	106.466770227723	0.078758	0.0277606403718019	0.5	1.73608005366726	0.0801469434394485	99.5996348006333	-0.154614972477243	-0.192391206532542	-0.144914552755593	63484750	-11.9078394904418	0.366444114389353	0.00744947469148427	0.0246492203925178	98.6649450175499	0.865057249461916	0.859721629117012	0.814565603656774	0.950033680037489	-0.976651386152616	2605082138.0505	-0.180784805682411	0.44028415885585	-0.00934814575301041	1.0218064	0.993440399999999	1.01678731407684	1.00164699591054	0
2002-08-23	0.0491145000000001	22.6133494708171	-2173684800	0.24241094989068	49.5371404736628	0.226707854762186	0.770411302649817	0.129927414492143	43776779.6167769	103.181369294946	-1.44107994579946e-11	-623697.393199979	0.025218416666665	71.3383491439756	470.628465422017	104.936634216273	0.0448219999999999	0.0222056270987645	0.5	1.53466651292273	0.0455218541621795	99.5901190810639	-0.138928897671301	-0.181698744760294	-0.0824063876339931	62929020	-13.9607361672004	-0.222985739816284	0.00864982720682974	0.0229389251544216	52.5256392231123	0.75758905010932	0.825677436114448	0.818269547809332	0.840493212724681	-0.83182479817846	2611883641.2763	-0.164011273912347	-1.19349489122324	-0.0151428021939834	1.0207818	0.998114699999999	1.01359387605123	1.00265790574499	0
2002-08-26	0.0472148571428572	21.6825066560281	-2221177000	0.374135025357057	47.4957870983913	0.184793002564449	0.651198325655977	0.128894694211185	37721856.9451323	101.699371886329	-9.69965892293902e-12	-617687.35419998	0.0250418974358957	65.1163816981449	481.758597837048	106.442756033962	0.0147269999999999	0.0132476337881414	0.5	2.28287996830846	0.014920682565442	99.7000050396021	-0.125237520927355	-0.170406499993706	-0.0374394102802822	61866630	-14.6786231112226	-0.359139257555839	0.00391232954087941	0.0195355083107482	22.2392781510764	0.625864974642943	0.759073282290613	0.798537459303092	0.680144928265655	-0.811001549253088	2608878189.35974	-0.0273968671791887	-2.16295990200569	-0.0127958868387402	1.015019	1.0015724	1.00719625070082	1.00115665015499	0
2002-08-27	0.0473169285714286	21.5543539181688	-2286734800	0.789109149415793	41.2687910572516	0.0882440690916433	0.30509021401367	0.128917554373645	18444186.0494485	97.4313778712547	-2.0807007953287e-11	-1731318.64149998	0.0244139487179471	56.6950755889705	472.255653935335	97.8906654559793	-0.00960399999999995	-0.00179021421458271	0.5	-78.5167213114749	-0.0100496627783743	100.165049324338	-0.113732173163712	-0.159071634627707	-0.0219112748286343	60709040	-12.7180550999585	-0.240339543404673	-0.0006204893173306	0.0227026875276134	-53.7863688522732	0.210890850584207	0.576345805055145	0.724473574553776	0.280090266057881	-1.13444835418197	2561141788.80518	0.0763936207194922	-5.32355452372284	-0.0447737075786232	1.0014444	1.0032372	0.988417500467213	0.992011804672263	0
2002-08-28	0.0466026428571429	21.5164768020126	-2348728200	0.871749866639134	40.0222442467236	0.0237515434999128	0.241500667662605	0.131029841463142	-3083638.78429556	96.6246928493129	-1.25506631593041e-11	-1724949.38839998	0.0223001089743576	49.7512739797098	456.724067210905	94.1704192900013	-0.0185690000000001	-0.0172570905994654	0.4	-3.60494739434883	-0.0195358431359512	100.597883906442	-0.107446313689581	-0.148746570440082	-0.0286991652567736	59924970	-11.5001188012514	0.0868368868340248	-0.00262521258493268	0.0221681821366692	-95.4809169258003	0.128250133360866	0.426980581157052	0.625309243421535	0.0303232566280849	-1.45532580263227	2512337059.46736	-0.0274743160062457	-5.05922776535915	-0.0101527470639216	0.983259600000005	1.0002278	0.972696666978142	0.982783294731852	1
2002-08-29	0.0468630714285715	21.7400376440654	-2348728200	0.871749866639134	40.0222442467236	0.0510952826722927	0.251109116091021	0.133102838322707	-15104959.6250114	96.6564590457592	-6.37706247685327e-12	-297723.303499982	0.0241184102564087	50.3980150264434	442.016234989381	92.9790680904448	0.00704299999999991	-0.0283407701131155	0.4	-11.1248778368986	0.00751069798432159	100.913814387374	-0.0975065203288437	-0.138498560417834	-0.0484867062452432	59115140	-13.2199719483928	-0.225596537008638	-0.00122460089457153	0.0216254149517928	-99.2511648027219	0.128250133360866	0.32740376522499	0.52600741735602	-0.0698035390370706	-1.69323654946709	2498655587.42334	-0.0657945117848393	-3.58550746361157	0	0.966995600000005	0.994400999999999	0.962216111318761	0.975232695689697	1
2002-08-30	0.0480365714285715	21.7786434736859	-2300348400	0.84420009292241	40.7145978242523	0.052526231886373	0.2636716077098	0.129655487479164	-23488102.3281212	96.8897040282306	3.53370621623084e-12	77456.0598000214	0.0209169102564088	55.8314377033471	427.06671534387	92.302888444755	-0.026892	-0.0347511686365302	0.4	-19.6852990497484	-0.0280756678177576	101.106355612091	-0.0879865572266249	-0.128396159779592	-0.0735577861302628	59295880	-13.5119001340766	0.0737229523137692	-0.000934016197500942	0.0216607969122189	-87.892140703119	0.15579990707759	0.270202479175857	0.440739104629299	-0.0708707717310277	-1.83657603889975	2479647164.00334	-0.117104492844391	-1.94989648642131	0.00339606798648192	0.954445600000005	0.987613699999999	0.956296407545841	0.969637114655206	0
2002-09-03	0.0478707857142858	22.623272625954	-2369582600	1	34.6797269064063	0.0342716792579767	-0.0896186585089158	0.129936138866829	-41992569.0271297	92.2733321879961	-1.79634571858995e-11	-1474151.59639998	0.0133071025641011	55.8896495676794	406.495637164565	88.3092036873253	-0.0998880000000001	-0.0425052090214672	0.3	-4.29877527769864	-0.105289039672588	101.64767357777	-0.0859960528245769	-0.119916138388589	-0.11652748503147	60207280	-10.7219035702033	0.0258504419391485	-0.00241786609603831	0.0241311459398223	-157.804503003224	0	0.180134986117238	0.353871065125278	-0.167337171898844	-2.29969985103248	2410412964.00334	-0.108697494971451	-4.83179865240051	-0.0486210336626101	0.935492400000005	0.975255699999999	0.937409271697227	0.956909457445169	1
2002-09-04	0.0472352857142858	22.8369732412282	-2264417400	0.807380719182874	40.5126890829157	0.0265364262170223	0.142139157422201	0.133362896279676	-45298466.7339015	95.1785894573859	3.86054111055746e-12	-103850.930399979	0.00754015384615225	55.9779733007974	381.406414396188	89.8262801316438	-0.085162	-0.0379748032240461	0.4	-2.80995289780872	-0.0878751047299496	101.769851138537	-0.0840602026073017	-0.112744951232332	-0.157128897327041	62064870	-3.84782778210492	0.05265488717043	-0.00307126501609596	0.0229987475888016	-108.55428761105	0.192619280817126	0.184296417683867	0.297346182644808	-0.0418031122380146	-2.41345635407383	2412138724.66984	-0.0785859474391762	-0.742635999165032	0.0301456534103269	0.930754000000005	0.966099199999999	0.933995514464818	0.951501919727865	0
2002-09-05	0.0454951428571429	23.1945572642407	-2320962000	0.935469972620256	37.9654724477838	-0.00417320195156643	0.0492098560776566	0.144854902394587	-44531639.7471738	93.4677937181763	-6.68308623635147e-12	904674.115100021	0.00101391025640873	47.8942873632123	363.160320946976	88.7914333911938	-0.115256	-0.0320123000367429	0.3	-0.832144083173947	-0.119505686650927	102.014263826724	-0.0829134947144324	-0.106778659928752	-0.200334721557027	60723670	-4.60005996957643	-0.353470925762949	-0.00662290437708941	0.0214515008631679	-117.005045788688	0.0645300273797439	0.144374287582493	0.24635555095737	-0.059588239167261	-2.63810524983332	2403019781.13915	-0.188496073448538	-2.04927280707138	-0.0209355555223961	0.924094800000005	0.953677199999999	0.925316676309879	0.94358502523189	1
2002-09-06	0.0436037857142858	22.7139874733992	-2275564200	0.8464788536643	40.6448070732088	-0.0498486229190393	0.170491093443309	0.151433856781123	-43265117.8110418	95.0743560733997	1.01149174629608e-11	-252400.497299981	-0.00498289743589897	46.5551562903476	344.806899660467	91.4176529750091	-0.0979680000000002	-0.0255429149318714	0.4	-0.832121620793231	-0.101110131039735	102.04079149615	-0.0786042258902453	-0.101143773121051	-0.237038218209495	60151700	-6.59047579872234	-0.300414071711131	-0.00653068657447369	0.0215440568619412	-79.5163345249757	0.1535211463357	0.147423240500229	0.213378114138323	0.0155134932240403	-2.67977107593504	2390048116.41915	-0.204380492414048	-0.300456269798211	0.0140056228627512	0.919996800000005	0.943496199999999	0.923799450873253	0.939435929735183	0
2002-09-09	0.0428385000000001	22.4308528374067	-2315125400	0.850926324859975	40.5505440590141	-0.045100911929234	0.193619584533298	0.158328682054635	-37360950.8555961	95.2065512661347	-4.85039479338344e-12	278022.529400021	-0.0132617692307706	40.3558127638038	339.721232757089	92.5305787101984	-0.112054	-0.0214806545602616	0.4	-0.61217101729509	-0.114917850234396	102.03199781938	-0.0729517469756111	-0.0955053678919627	-0.266947722763466	59558310	-8.9635222073468	-0.313713361780898	-0.00734836491972984	0.0210491935833871	-77.9124376917285	0.149073675140025	0.147973385380161	0.191576537885602	0.0607670803692782	-2.68899230830189	2396296462.74786	-0.20492167687853	0.0116120895438177	-0.000695315880671551	0.915130400000005	0.934787999999999	0.922574633915502	0.935924851601513	0
2002-09-10	0.0418691428571429	22.2233199579803	-2377492600	0.868723158816417	40.1492817896091	-0.0679016350688325	0.200571122929382	0.164771512206811	-29603915.204658	95.1495914271169	-9.33553005425907e-13	-92520.7835999767	-0.0217171858974372	39.8334495019614	355.780861915447	96.4983278295438	-0.105011	-0.00913024065537767	0.4	-0.625069925084183	-0.108356902595889	102.015515012525	-0.065665381823641	-0.0895373706782984	-0.290913748809085	60429600	-7.69368806818762	0.290229386414424	-0.00723429394870989	0.0210708316445641	-74.590431118302	0.131276841183583	0.142407870647968	0.175186982139724	0.0768496476644566	-2.68873522805718	2404723314.7362	-0.27543802396329	0.221509585641565	-0.00278719811450294	0.918716200000005	0.927104299999999	0.920904422610335	0.932586514946692	0
2002-09-11	0.0401344285714286	21.6600012169116	-2428095600	0.886526941946603	39.725777054068	-0.0351525254192075	0.201901347872262	0.169631109799703	-28378614.3622046	94.9785175152201	3.3633813212655e-12	-144683.642599979	-0.0301397435897449	39.4299267917033	370.874163184822	97.2108514695805	-0.092205	-0.00789657780401242	0.4	-0.406253207311271	-0.0960101816007903	101.993648310792	-0.0628307370679765	-0.084196043956234	-0.309739336844816	59586380	-8.21197188537777	-8.29955874479538e-05	-0.00837650278164105	0.0202972100061907	-63.6058596796704	0.113473058053397	0.132762933116445	0.161045632465298	0.0761975344187384	-2.68106091906152	2385606485.90877	-0.349057334766302	-0.337128441198118	-0.00279608119888484	0.916283000000005	0.923518499999999	0.91893694840689	0.92938933041093	0
2002-09-12	0.0391140714285715	21.172953012688	-2495553200	0.946511516925426	38.1032203553435	-0.13615089239674	0.169087730309831	0.175999798449505	-39471355.5161204	94.3044034962493	-1.31138787920115e-12	-388753.838199979	-0.0360790064102579	30.8720501372678	382.557093514564	96.190511604188	-0.0890029999999999	-0.00454480531590872	0.4	-0.406253207311271	-0.0937659197965256	102.03683539408	-0.0623812188319783	-0.0798330789313829	-0.32680478467414	57970710	-6.23344010296153	0.0436285538871601	-0.00846161451362086	0.0203038982563813	-67.9367820775978	0.0534884830745736	0.106338116435821	0.142809793788805	0.0333947617298519	-2.72793199986294	2325069476.79111	-0.326715407373705	-0.991923726943202	-0.0105516250344755	0.915770800000005	0.919932799999999	0.914423965604593	0.925027270336215	1
2002-09-13	0.0380674285714286	20.9096485733707	-2424815400	0.931232501908883	38.6430431130378	-0.191454423474015	0.211028952041365	0.180974059966145	-43037764.1676936	94.9604807099668	-2.57510627274245e-12	-255987.73829998	-0.0375895000000014	29.9455070423486	398.555674470741	96.0677934516871	-0.0435410000000001	-0.00378673713279726	0.4	-0.505762726949092	-0.04687274103832	102.015611375058	-0.0631484327679801	-0.0764961496987023	-0.339913993376473	57481620	-4.19375275424682	0.550018629345008	-0.00723658270322256	0.020394376753891	-76.992145702114	0.0687674980911169	0.0938145769875862	0.126478054855066	0.0284876212526273	-2.71886181114995	2312875188.41071	-0.352411250023053	-0.770281943351116	0.0021194711795824	0.913081600000005	0.916539199999999	0.912055643736396	0.92180758482054	1
2002-09-16	0.0365367857142858	19.8478035920566	-2353155000	0.742775939667759	44.388260073679	-0.171173310629032	0.354395085963686	0.178031492765765	-30812208.014153	97.6003758320206	4.73835619114602e-12	825035.782900018	-0.0366864743589758	37.56719154204	423.325203877123	103.202854490988	-0.012806	-0.000209894239533464	0.4	-1.19016299685445	-0.0136986392028868	101.758965220495	-0.0607535533242893	-0.0733476304238197	-0.34066884497671	57999340	-2.45376167139677	0.411372806745568	-0.00466495706345611	0.0218672219414327	-24.0950251655967	0.257224060332241	0.148284404769138	0.133746838159756	0.177359537987901	-2.50021507456379	2352362116.25071	-0.316491370079311	1.39859847098306	0.0230213547715117	0.914746400000005	0.914938399999999	0.917520095824264	0.923015114853169	1
2002-09-17	0.0338271428571429	19.1154748703028	-2246155800	0.334822519757748	49.05815624179	-0.162869616871612	0.489110418257178	0.165331618101095	-23008939.9230423	100.016865467396	8.85963386174851e-12	1784765.94240002	-0.0356603525641042	48.0566277857695	446.576318673286	102.209955477324	0.00640300000000005	0.00111266151240931	0.5	12.6215063253899	0.00677958648700234	101.353719810351	-0.0570160492224209	-0.07008131418354	-0.325351550857811	60642330	3.16431515448022	0.489889161532844	-5.95640707763333e-05	0.0196737178058061	112.05355014234	0.665177480242252	0.320582096593509	0.196025257637674	0.56969577450518	-2.13564355283293	2352365372.76226	-0.281723913026713	2.98037269600582	0.0204782256898891	0.920765200000005	0.919740699999999	0.927566063882843	0.92749563942532	1
2002-09-18	0.0343373571428572	18.209533462636	-2163995400	0.14353222345944	52.2264585893804	-0.121935843430295	0.606598815359174	0.153675009971502	-1892584.3179307	101.809794285453	-6.29091667031822e-13	1606370.59380002	-0.034293570512822	56.1615334406778	475.175447751452	105.923835767915	0.017288	0.00743500418981584	0.5	3.27609052148245	0.0181391835911692	100.899046208738	-0.0505122762053116	-0.0661675065878943	-0.294624241546493	62417530	4.40732897278908	0.281645506391811	0.00172375373368282	0.0198244228632754	130.029674779922	0.85646777654056	0.49921065657586	0.297087057283736	0.903457855160107	-1.70541904834783	2414345883.78058	-0.242857743348705	3.68154498433307	0.0147556650906488	0.930113800000005	0.923198399999999	0.938959042588562	0.933722795893444	0
2002-09-19	0.0339518571428572	17.3683021555167	-2215481800	0.526112816056055	46.056809186914	-0.165509168001395	0.433922543658557	0.137187934567006	2644598.30833006	99.3458253025588	-3.78749525117309e-12	-146592.139399979	-0.0314409166666682	55.5476631312928	500.803252417293	101.39080004127	0.0339360000000001	0.0106746642580478	0.5	43.1295336787548	0.0370278924274796	100.814854383824	-0.0495327164972108	-0.0628405485697576	-0.266026140562581	62461490	1.81316295828994	0.226712016440324	-0.00036872251670431	0.0214959269441005	60.4859833080077	0.473887183943945	0.490769499031888	0.361647871199787	0.749012754696091	-1.5889909175037	2395039328.48461	-0.215219361452397	0.309555276192875	-0.0297323248262997	0.935748400000005	0.925759599999999	0.937163028392375	0.93369519664009	1
2002-09-20	0.0332375714285715	16.9089269923172	-2127284600	0.21455223880597	50.229946761503	-0.118823719441828	0.629743311309807	0.113754149049671	18291673.1728606	101.702991566996	1.45701904368842e-12	93577.98660002	-0.0286211089743604	57.4029909389728	531.869215268448	103.479418557261	0.024972	0.0167410702471898	0.5	6.51784199513657	0.0265773038836195	100.564187025534	-0.0493673536897331	-0.0601459095937527	-0.232477709569023	63642460	3.98003230648945	0.600492845243391	0.000809023987805548	0.0221598470724504	115.181773688583	0.78544776119403	0.588995586419269	0.437430442939614	0.892125873378578	-1.32158243111302	2453837461.81794	-0.184522009595051	1.45550910141602	0.0196950648664669	0.944712600000005	0.928897099999999	0.942155352261583	0.937048797250983	0
2002-09-23	0.032638	16.2365112903619	-2193212000	0.233355858502761	49.9431277438293	-0.0928822891970002	0.678471557982754	0.0936753817250572	32388780.5878172	101.872839905492	-9.04519759614303e-13	776673.36740002	-0.0231743717948732	57.4591779188889	564.689356134155	103.628738703785	0.0429010000000001	0.0181461171089491	0.5	1.88248264597795	0.0461676148521188	100.381820950078	-0.0502983264828305	-0.0581763929715683	-0.197650474712641	64898260	3.07925247465741	-0.048940823608099	0.00410285378820386	0.0173356231168998	87.7833481042501	0.766644141497239	0.648211771445259	0.507690885774829	0.929253542786118	-1.10792260977336	2491325662.20226	-0.112778883239357	0.541676219767128	-0.00134524455389678	0.949194800000005	0.931970599999999	0.945056901507722	0.939559925023531	0
2002-09-24	0.0313257857142857	15.5068128787936	-2255877400	0.43089669761429	46.9124912980103	-0.0827024252311415	0.576060303176204	0.0728957125980987	37347807.3527703	100.739696811462	-2.50521021169578e-12	-463524.352899978	-0.0189056153846168	48.6916390359371	597.522743942052	102.44928426386	0.0166480000000001	0.0139263669859549	0.5	4.33302049888859	0.017919107278838	100.365392688001	-0.0530293782918435	-0.0571469900356233	-0.168669888881723	65656920	1.96069818759421	-0.517722985907035	0.000906670304541335	0.0161586354076857	40.0348926576811	0.56910330238571	0.621842281758743	0.5457413511028	0.774044143070627	-1.04194606887912	2500278459.01559	-0.0781940286029229	-1.0365122065417	-0.0142428847105296	0.947145800000005	0.933955499999999	0.942508934338482	0.939169575019253	1
2002-09-25	0.0319434285714286	15.7908240619598	-2192206800	0.230474474635976	51.3066482864868	-0.0426798533684887	0.888010760849222	0.0675663213337145	37209443.2930555	102.706959494449	1.12486639987686e-11	169818.868800019	-0.0133316474358988	55.1789123671863	626.954192176278	105.586935248366	0.035857	0.00839297787764818	0.6	1.83187701428743	0.0382295540433909	100.175033442966	-0.0537771953463171	-0.0564730310977621	-0.137342989534084	65562560	1.17070315839325	0.118693210288502	0.00380143457095627	0.0156073710637919	114.198492691079	0.769525525364024	0.67107002962717	0.58751757727759	0.838174934326329	-0.820968093183194	2505177779.85992	-0.0380501158127512	0.77623407091463	0.0196151308838814	0.945993200000005	0.938053499999999	0.946999956225654	0.942226379561207	0
2002-09-26	0.0329164285714286	15.7522057699529	-2244368000	0.451566289931362	47.9189773472147	-0.0267941503155693	0.655007863970923	0.0673916258788257	26535562.1511645	101.124748330981	-1.01224032422569e-12	207060.689500017	-0.00837747435897562	49.9044940823827	632.738426910553	103.740250121512	0.0236909999999999	0.00621700632170561	0.6	3.06608724171859	0.0254917589206205	100.167320848361	-0.0566346418581389	-0.0565053532498375	-0.111728010137757	65070950	-0.841850345669813	0.13887527776534	0.00169363008090819	0.0160939919929539	75.4290992379143	0.548433710068638	0.630191256440992	0.601742136998724	0.687089495325529	-0.76316788773968	2477466643.15782	0.0664756885824374	-0.417740729906395	-0.0155249932372733	0.947530000000005	0.941639199999999	0.945084970817103	0.942049765095533	1
2002-09-27	0.0328653571428572	15.4295455837921	-2192829800	0.435038963719873	48.2391238188162	-0.00447039232681299	0.682592278553628	0.0664862793021047	23294027.2092414	101.255406281603	-7.58459837557385e-12	-351078.779099979	-0.00263516666666785	49.2234867117659	637.477868312991	101.517261583566	0.0275340000000001	0.000474085912029756	0.6	2.92388386658849	0.0296478638136963	100.146902949756	-0.0584349770998204	-0.056891278019834	-0.0903148392539466	65595740	-2.54180428500637	0.264474440318903	0.00184048887736705	0.0160798927019695	26.3198587188093	0.564961036280127	0.608447849720704	0.603977374572717	0.617388800016677	-0.698347262968879	2492790813.56799	0.0921655099844125	-0.439598280760613	0.00136002369419087	0.945609200000005	0.945160899999999	0.944235313878069	0.9421381714418	0
2002-09-30	0.0338205	14.6510240067687	-2252254200	0.616787944470248	44.9656831024002	0.0402282870635762	0.477105928731857	0.0645638834108101	29469980.1101608	99.8278962848919	-1.06033499707191e-11	-385545.54429998	0.00290598076922965	49.3565257220575	651.770192040351	97.9730029187745	0.0230509999999999	-0.00428624404569653	0.5	4.53751496289204	0.0251408259510941	100.259397450569	-0.0599982865536803	-0.0575126797266033	-0.0779162043805348	66147970	-2.88974531985628	-0.0483345797174053	0.000971736681780926	0.0166667648184144	-69.6726141376413	0.383212055529752	0.533369251657053	0.580441333600829	0.439225087769501	-0.758992276996739	2532867554.52	0.0487682269660477	-1.51685805432525	-0.0150586628970776	0.941127000000005	0.945160899999999	0.938973209252046	0.939649231179654	1
2002-10-01	0.0345857857142858	14.3615088436696	-2166648400	0.564220348106944	45.1477979183022	0.136173095179245	0.481005938167231	0.0629281723550075	44777498.3760738	99.7387770674531	-2.00428007798529e-12	-391161.905399978	0.00772468589743469	42.547678547035	665.052645825505	96.6045053522503	0.0217700000000001	-0.00408936091307782	0.5	3.96089176734337	0.0237104389521042	100.332675583965	-0.0604070337418587	-0.0580915505296544	-0.0712556658387209	66966550	0.100658286180126	0.525742174788167	0.00122041507165737	0.0166322221826301	-82.4146360697138	0.435779651893056	0.500839385069054	0.553907350756904	0.394703453693354	-0.792714883765733	2592793811.74286	0.0968979147697571	-1.06819783897144	0.000689084180592506	0.939462200000005	0.943303999999999	0.935678472834697	0.93772918914699	0
2002-10-02	0.0353000000000001	13.8503099115567	-2223985400	0.824642622166398	40.2666663552214	0.107211356311449	0.125231144888892	0.0641920297927885	36349602.3641849	97.5056255580826	4.72676043392568e-12	-596719.388999978	0.00931316025640894	42.9736760254966	658.693908208008	97.1880017695494	-0.02113	-0.00874641401112094	0.4	8.00318765204265	-0.0230213547715117	100.585218633913	-0.0591096465309465	-0.0582951697299128	-0.0766486208193085	64575140	-1.01556538632845	-0.162553112773853	0.000296457709131178	0.0176606701605419	-98.3461156522253	0.175357377833602	0.392345382657237	0.500053361390349	0.176929425191014	-0.99592818961628	2550602491.53787	0.0598230963500657	-2.86755771567446	-0.0237104389521042	0.929729600000005	0.937861399999999	0.926225315223132	0.932200063847537	1
2002-10-03	0.0365754285714286	13.5504015433332	-2169511400	0.72506728871344	42.8125749608433	0.109762254477934	0.250514310208661	0.0622201777286567	28068208.5493169	98.3595586316718	-2.45131258949229e-12	-397392.456999982	0.0079997435897422	49.2575325355793	638.432912971725	96.1668452118386	-0.032015	-0.0123959666331753	0.5	5.55604671469112	-0.0343671269567159	100.685474437163	-0.0565329044901044	-0.0579427166819511	-0.0855354798582009	64471610	-2.25536275565039	-0.261256559873956	0.000800212190985044	0.0178166342658978	-105.698188007302	0.27493271128656	0.353207825533678	0.451104849438125	0.157413777724784	-1.0737686642096	2544550766.40759	0.142766666881792	-1.26580367561664	0.00913245350468489	0.924607200000005	0.936068599999999	0.922697876815421	0.92918968860253	0
2002-10-04	0.0361672142857143	13.4128690232042	-2217217800	0.931885878342006	39.0863140594562	0.0898822561354296	-0.00325950671282369	0.0659835003813393	13021124.8478422	96.6186526030429	-4.69356543356862e-12	-185677.18679998	0.00436719871794722	42.9562953127983	606.165876211282	94.4780514481627	-0.063391	-0.0162914126547752	0.4	-4.01487932321474	-0.0681851427864122	100.913021033254	-0.055484296452404	-0.0574510326360417	-0.102364124319465	64587040	-4.10305982332592	-0.406872732974019	-0.00221194527416274	0.0172788500209329	-142.982109799286	0.0681141216579936	0.25817659090845	0.386795429928233	0.000938912868882924	-1.27171096481425	2506152693.86534	0.113627151331374	-2.37740858733048	-0.0190623507390475	0.915770800000005	0.930689999999999	0.914583251210281	0.923583199765706	0
2002-10-07	0.0359176428571429	13.9291789670407	-2278392200	0.992504959952972	35.8505652904735	0.0391361306364238	-0.169632147728715	0.0743023672140558	-8504571.89981794	95.0244677987043	-6.8705515378982e-12	-921613.68039998	0.00233546153845976	33.0823806880993	569.404275444068	94.057368523799	-0.051865	-0.0191438382687377	0.4	-1.09862024592508	-0.0571583508307854	101.228768917219	-0.056043273648373	-0.057169480838508	-0.129044794376199	65667700	-3.79104816360964	-0.559092556445883	-0.00501344622690109	0.0164392804788835	-161.7645293537	0.00749504004702762	0.174616073954642	0.316068977937036	-0.108289734010146	-1.55801363443304	2447696056.46373	0.0659687357537477	-3.11916726489602	-0.0187055328706729	0.906422200000005	0.923774599999999	0.903624167473521	0.915969163444669	0
2002-10-08	0.0360707142857143	15.3976990943941	-2391803400	0.814424201091193	34.7774564734336	0.0370369463735429	-0.103925002659669	0.089175497602916	-14586926.9283104	94.6156780856512	-8.52067199712197e-12	-835953.372799982	-0.00137908974359147	22.9972595076235	539.821413220703	91.6276666297064	-0.076196	-0.0243744873258623	0.4	-0.625097294230948	-0.0834099208504678	101.502006187392	-0.0535546372138826	-0.0564465121135829	-0.161834739828548	68219900	2.90370931529667	0.322346717691143	-0.00654202662167542	0.0154115277607405	-181.358273499958	0.185575798908807	0.178269315606031	0.270135757160035	-0.00546356750197741	-1.81768767331553	2455256450.29437	0.12826233793741	-2.81785225926893	-0.00655650515321549	0.895793200000005	0.917627699999999	0.894397444982347	0.908691861000184	0
2002-10-09	0.0357930000000001	16.7613249269365	-2480975000	0.86121395167576	33.6912196112228	0.0380872507497597	-0.0615685918905393	0.10273032916688	-19663014.6543574	94.2212637954685	-5.2057642792098e-13	-583685.63259998	-0.00696949358974519	22.2194824287037	530.709590246102	92.4490175350994	-0.0806790000000001	-0.0232809554984948	0.3	-0.887488293687957	-0.0886656022618314	101.739291353783	-0.0538186651205071	-0.0559209427149678	-0.197986046325482	70148330	4.95236233047987	0.549244908115128	-0.004919492350619	0.0139591698901098	-154.596969504083	0.13878604832424	0.1651082265121	0.23512658027739	0.0250715189815212	-2.05396384681666	2439041626.59651	0.0700623751103575	-2.39404525618768	-0.00660092596526041	0.888365600000005	0.909047599999999	0.886325296654898	0.901689886272877	1
2002-10-10	0.0369154285714286	16.6758067248708	-2400581400	0.590883995843076	44.4806646283946	0.117755825539724	0.306701697557066	0.106364744254818	-6178249.9038744	97.8366557312786	8.77875339579266e-12	1081444.68740002	-0.00888630128205281	21.176831660912	522.519471932149	95.8559673052276	-0.0339360000000001	-0.0218271732696466	0.4	-1.60644543879161	-0.0368733003879507	101.555924039852	-0.0500235370343143	-0.0547414615788371	-0.220327876918947	70795130	5.46853896441293	-0.0926406454506186	-0.00360713437780697	0.0170028866789157	-74.829968048147	0.409116004156924	0.246444152393708	0.238899104316163	0.261534248548799	-1.92501873955773	2491800256.33795	0.0534673723029779	1.4135208374451	0.0375494171633511	0.885932400000005	0.905269799999999	0.892042531103265	0.902014816041445	1
2002-10-11	0.0377827857142858	16.0163124264248	-2326912000	0.382940374123148	51.075320920423	0.136798188192114	0.559443870992345	0.105387379648863	3902329.56521177	100.491702387017	2.34790315449835e-11	2281802.98920002	-0.0119400769230784	28.8865889849171	503.647600187723	100.068932165364	-0.0268929999999999	-0.0132787507479646	0.4	-7.45238297510834	-0.0285345482595676	101.141638379406	-0.0455352649547516	-0.05290022225402	-0.222117545861034	70941710	5.06663951644667	0.11103337965131	-0.0014862344405301	0.019037064893975	33.8101304236646	0.617059625876851	0.369982643554756	0.282593617395694	0.54476069587288	-1.57725201877336	2506969136.31571	0.165924323094183	4.02674055950715	0.0279538830122645	0.892079400000005	0.903925099999999	0.904391354068844	0.906937394943	1
2002-10-14	0.0383528571428572	15.8454332453199	-2278311000	0.247775396206807	54.8310252703441	0.11850537943078	0.716549782954468	0.106856520996157	10400266.5374355	102.196827040717	1.37797220839076e-11	1347965.06040002	-0.0125270384615401	34.6771425461308	478.190182087948	101.791862781714	0.0044820000000001	-0.000849057604622863	0.5	5.69580877537657	0.0047504265292107	100.657399959808	-0.0400623984197706	-0.0503326574871701	-0.203956607268263	69788740	1.89597226182903	-0.254165354365153	0.000803805737099095	0.0193237396282071	87.8883776254414	0.752224603793193	0.497396630300902	0.35419462169743	0.783800647507846	-1.14171528845473	2517768938.52463	0.181132404045046	4.96265908318209	0.017759981551505	0.904885600000005	0.905653899999999	0.918173236045896	0.913991868589728	1
2002-10-15	0.0380978571428572	16.2241343336973	-2176931400	0.0518254588838454	59.8142597900836	0.16397810004568	0.943371504366087	0.111056182122179	27447986.3005919	104.7648346985	6.25892769353991e-12	1670380.40960002	-0.0121248269230787	37.3787743277414	481.674194839416	106.986517421105	0.028173	0.015178733601309	0.5	4.47983985117483	0.0294526174556477	100.056881941961	-0.0328925985413266	-0.0468446456980014	-0.164235341245356	69507760	5.26877228371667	0.465148969910107	0.00127495090032758	0.0198947317373177	151.093455980369	0.948174541116155	0.647655933905986	0.452015059100282	1.03893768351739	-0.57228180568748	2580320381.22688	0.0920568327409799	5.98924103257107	0.0260622146206279	0.923838600000005	0.909815899999999	0.935685157363931	0.924304074300686	0
2002-10-16	0.0411080714285715	15.7218107616294	-2253837600	0.361520664887828	50.5707555449901	0.123909336967771	0.582027628425839	0.108228578429613	33534419.9108295	100.778710332458	-3.57288697595251e-11	-211465.510199982	-0.0123710833333353	36.4787420975122	472.81688927937	101.818175861116	0.00384200000000001	0.0255778145529208	0.5	106.923745173742	0.00412954572895513	99.976687254899	-0.0290324755766092	-0.043282211673723	-0.128312284959775	69245050	5.11271786694236	0.388247573960168	-0.000451631648115855	0.0223509561134303	49.7962182618868	0.638479335112172	0.644597067641381	0.516209061947315	0.901373079029514	-0.452750861524454	2585948048.45658	0.331275793364804	0.761273922432164	-0.0403817346237702	0.936260600000005	0.912313099999999	0.934553771575954	0.925756242609652	0
2002-10-17	0.0419417857142858	15.2553674447092	-2371161800	0.593796099991133	44.9589621609806	0.103289490310005	0.309508983505751	0.108845012493143	23297625.3982368	97.8230911790181	-5.01660283215231e-12	-3167580.94519998	-0.0140621474358992	34.3044675457897	470.000669100563	100.570265173862	-0.0256120000000001	0.0268772390934812	0.4	-3.76792043773013	-0.0279538830122645	100.188094117261	-0.0269469774553315	-0.0400151648300447	-0.107822400721569	72536940	9.04968851852469	0.822617762707402	-0.00275646078512884	0.0237684341858267	-21.8788371324478	0.406203900008867	0.565132678430543	0.532516934108391	0.630364167074848	-0.602740595566953	2544885399.70956	0.216045917697212	-2.9350842826397	-0.0313943445606271	0.936260600000005	0.911096499999999	0.924194847717303	0.921705471226079	1
2002-10-18	0.0412417142857143	14.9879425532622	-2299087000	0.475078798236209	48.1273345052869	0.111313363914991	0.474069736969109	0.107332882405088	33372843.8559728	99.6006283858928	-1.89761192538862e-12	-1159566.95959998	-0.0136476025641042	40.5927437718047	484.896191953572	104.139475063116	0.010885	0.0224841759345803	0.5	-507.01632653072	0.0119254909444229	100.203211701741	-0.0240368253433828	-0.0368194969327123	-0.0918512167180197	71730820	7.39912796262429	0.192999552198682	-0.000524588797061187	0.0240016725842003	-12.2617394382513	0.524921201763791	0.551728852874959	0.53892090703058	0.577344744563717	-0.586349521012197	2613529439.22956	0.186665595691223	-1.61233837193178	0.0161689350045832	0.934083600000005	0.913081499999999	0.922197898478202	0.921068840094065	1
2002-10-21	0.0413947857142858	14.0428793880987	-2239456800	0.361520664887828	51.0310830775893	0.118028814197653	0.631491438743287	0.104953260467049	46534512.7092147	101.230643375106	8.20532213542796e-12	950728.103500021	-0.0132207307692322	47.3224965604854	508.946111631927	106.432717160001	0.016648	0.0142307061326612	0.6	10.4276624753826	0.0180184469957819	100.078197145755	-0.0218923003169686	-0.0338340576095636	-0.0737669165606913	71415960	4.74042453605154	-0.361590880715816	0.00052202441279051	0.0243752400182098	29.8586111347258	0.638479335112172	0.580645680287363	0.552829164782841	0.636278711296407	-0.444975482675791	2659908483.674	0.223057149228331	-0.159976182950185	0.0152254095560439	0.931394400000005	0.918139999999999	0.925562265652135	0.923109232804235	1
2002-10-22	0.041854	13.4914036126086	-2184919800	0.289260062393693	52.8401750453827	0.128504519002712	0.725128618404751	0.104826178698135	53625016.7337232	102.182664397328	1.39491520985754e-11	664440.147700019	-0.0101381858974373	52.7247789468941	533.021601726126	108.167726024816	0.042901	0.000899510277438507	0.7	3.33735433357611	0.046649891208761	99.9009115083878	-0.0207008156772018	-0.0312074092230912	-0.0517479218560712	71009540	2.00084115789235	-0.0500667691847454	0.00288249431505266	0.0234600863192847	71.4578279636681	0.710739937606307	0.624010432727011	0.576556254097565	0.718918789985904	-0.251913392488479	2682779394.66167	0.181789735737992	0.880689546886784	0.00956909347393164	0.925503600000005	0.924671099999999	0.930793177101423	0.926408463203465	1
2002-10-23	0.0415479285714286	13.1713317516135	-2132660600	0.196346663872117	55.1353001541145	0.147706513950603	0.858015925350534	0.102331240563556	59160014.0126963	103.451902022537	7.09349228461205e-12	545604.603600021	-0.00441230769230916	52.699422008175	558.000317898471	105.45713947339	0.071075	-0.00358164185603127	0.8	3.17858203572489	0.0775264095108472	99.6656073959196	-0.0197979837020323	-0.0289255241188794	-0.0240108658881022	70438970	-0.503005489247139	-0.0415075717173892	0.0031018565783444	0.0235376724471754	91.773688771015	0.803653336127883	0.683891400527302	0.612334636240811	0.827004929100285	0.000904726315331672	2713263673.95934	0.166960812984634	2.4440805053635	0.0121709854314133	0.929601600000005	0.932931099999999	0.938122451400949	0.931203469893744	0
2002-10-24	0.0428235	13.4370437329922	-2176347600	0.297928146882595	52.2450640240584	0.150427102196226	0.728302078076383	0.102417304716222	49443435.4268808	102.134479951759	1.23077685924876e-11	35421.7486000215	0.00178963461538306	57.1382351665189	561.018958532017	101.240570063794	0.064671	0.000410125959795652	0.7	2.86699450833318	0.0712317546991546	99.6106645960338	-0.0177332157249528	-0.0266870624400941	0.000720718474056525	70015260	-3.56149677808864	-0.0880149857945867	0.00353849062835314	0.0231520352353649	87.8871974639438	0.702071853117405	0.68995155139067	0.638206941290764	0.793440771590481	0.0941117675607117	2688110496.58412	0.13644989955766	0.985341111754981	-0.0128511599649081	0.937029200000005	0.936644899999999	0.938953300933966	0.93291465718579	1
2002-10-25	0.0449152857142858	14.0272520525555	-2106580000	0.0157023157616949	60.7568532447605	0.183444011715145	1.15458544506947	0.110881510362638	58733136.4051123	106.949702959315	4.04970338667231e-12	1364825.44240002	0.0094856538461523	63.347996713692	574.160118614241	104.400906383064	0.117177	0.00882169825211541	0.7	1.69971120257324	0.126331452979998	99.1514805246282	-0.0136600452845719	-0.0240816590089897	0.0404536779484488	70926730	-2.86620146351208	0.131440917268222	0.00841175871905748	0.0252357833519134	122.341283567789	0.984297684238305	0.788066929006548	0.688160270529358	0.987880245960927	0.564228259845034	2753012491.34873	0.165434679987857	4.43620665582595	0.0484987723155825	0.950860000000005	0.942471799999999	0.955088200622644	0.942813446788374	1
2002-10-28	0.0454255	15.4367338712726	-2019255000	0.145875003754091	62.6239884308095	0.153922511584846	1.11103382869543	0.132962878604577	57855380.9957423	107.852245068976	2.29161179501861e-11	2161727.77590002	0.0156670641025625	73.2645057886925	570.621149028741	102.968345817336	0.0960460000000001	0.0170651154031605	0.7	1.56267077908953	0.101027512031018	98.725457580032	-0.00886596487806646	-0.021038520182805	0.0913471685660472	72321760	-0.246614628540581	-0.261383361155872	0.00975860280527517	0.0248773282643306	177.404721799651	0.854124996245909	0.810086284753002	0.728802275270573	0.972654303717859	1.02501090165399	2755506493.34873	0.18897768030967	4.22875364779199	0.0122454762143718	0.964306400000005	0.947850399999999	0.969899800415096	0.953124274645033	0
2002-10-29	0.0478745	15.924065391929	-2084049800	0.222335307764762	59.8787161656545	0.116110315288913	0.95185753815629	0.144993682932925	53014655.0699511	106.336078791081	-1.17642332795224e-11	178508.613500024	0.0191764807692292	74.3346669871592	573.4938659376	106.043928344262	0.059549	0.0247896091839827	0.6	1.62497956514631	0.062123702166865	98.5341727111287	-0.004243582964369	-0.0176795327391178	0.14104646789026	71281210	-0.807453973554483	-0.319337250015575	0.00945067374011765	0.0251206028718439	128.514869899507	0.777664692235238	0.799279087247081	0.752294545929409	0.893248169882424	1.27922840448704	2758323487.08836	0.312413750525642	2.09388021348764	-0.0109499268518887	0.973783000000005	0.949643299999999	0.976145866943397	0.959581315618663	1
2002-10-30	0.0491500714285715	17.0905649191716	-2016380800	0.167890118367445	65.1108479382999	0.150481899813762	1.07668103464809	0.167574172949437	48514509.0275311	109.373416663424	3.01344376006739e-11	817249.807500019	0.0223329038461523	74.2591008261371	571.617122569501	113.253021382946	0.0774779999999999	0.0294918419411204	0.7	1.61880867594691	0.078740392333519	98.1222680308239	0.00125461572519781	-0.0138927030462547	0.199808796478029	71797810	-0.90916443880626	-0.172306398488683	0.00921575052951745	0.0248442845601175	174.697851880976	0.832109881632555	0.810222685375572	0.771603925744797	0.887460204637123	1.74837547928408	2766687908.56322	0.112565691381592	4.19474790949952	0.0343766717181589	0.987869800000005	0.958735699999999	0.991835577962265	0.97115107641527	1
2002-10-31	0.0483337857142858	18.2656248435168	-1942421600	0.1552291228606	65.9086922272082	0.131125450634364	1.00445034020367	0.190172535792954	34418639.9232101	109.327106896782	8.8130203612261e-12	1382971.96170002	0.0243810705128188	74.4841656562628	555.643100025938	112.064094689198	0.058268	0.034067690048221	0.8	1.73058932731509	0.0582936514515563	97.8092867577035	0.00790595297710561	-0.00953297184158263	0.26162872030957	72772070	-0.253759355484813	0.00392607356906893	0.00759310846248921	0.024232899215011	157.865061825611	0.8447708771394	0.821738749296848	0.78831553359548	0.888585180699583	2.13738280659734	2735396175.8545	0.134843196804733	3.44377971310539	0.00561547373866522	1.00554220000001	0.971285699999999	1.00421605197484	0.981664880703403	1
2002-11-01	0.0486909285714286	19.1676390824624	-1894964400	0.0580049768270118	68.4155215660681	0.175177433561651	1.02008242698386	0.207344446965655	32167121.1025281	110.424937733934	-9.85133615130998e-13	653716.557200022	0.0298975833333316	74.5784347263591	535.373348371081	112.362663588944	0.115256	0.0327836632009337	0.8	1.71803058760397	0.116561521813749	97.4677634221193	0.0153755719788666	-0.00455126307749278	0.327398065967288	72759610	-2.83636531968021	-0.0238158546093707	0.00760228151943255	0.0242371324073128	134.336892476041	0.941995023172988	0.861824173922228	0.812818413704396	0.959835694357892	2.56300902121063	2761069528.80027	0.176868900992615	3.45703836775318	0.0178861357384223	1.01758000000001	0.984219999999999	1.01865970131656	0.993643447848239	1
2002-11-04	0.0515480714285715	21.125329380654	-1800759800	0.151295739944236	72.4084428536334	0.213642266998235	1.07002714606729	0.23235178579567	29602906.0059652	112.814346496848	3.43127894603872e-11	2039103.75480002	0.0393873012820496	74.6863883373294	507.031365250306	114.897981949631	0.178006	0.0336883397229384	0.8	1.66473744348949	0.179837873210218	96.9918972495547	0.0259646818266461	0.001551925903335	0.4030369807414	74411120	0.631024392752656	-0.0734028748232056	0.00803020142031508	0.0246441066503161	155.269799757594	0.848704260055763	0.857450869300073	0.827695898902955	0.916960810094309	3.13179824292638	2765643263.79728	0.266314358395012	5.1790430258584	0.0318820068358425	1.03397200000001	0.999139199999999	1.03960080087771	1.0096142755122	1
2002-11-05	0.0483848571428572	22.9399731759517	-1748086200	0.150989827082372	72.4791044764492	0.247076423463201	1.00853526329735	0.239193591575522	36812342.9731393	111.680129971813	-1.24693267215453e-11	1615319.20480002	0.047136679487178	75.8893566161234	479.460113752039	113.575207733991	0.163919	0.0374695179586424	0.8	1.26193127784173	0.164260543163901	96.699675431184	0.035739244763058	0.0083893896752796	0.478055638704733	71374240	-1.47500707624063	-0.378472116184938	0.0108994183802365	0.0206973097354098	116.65583011865	0.849010172917628	0.854637303839258	0.836676367215057	0.890559177087662	3.5352788178117	2807954289.22645	0.212594562289207	3.85085819971029	0.000591604958265463	1.05266900000001	1.013226	1.05377486725181	1.02279767996452	1
2002-11-06	0.0488267142857143	24.9854785350555	-1693988800	0.060949618790235	74.7120006800657	0.291263979179759	1.02881231045205	0.245762561065561	45927373.2634873	112.446111071197	1.88204080048208e-11	571083.415000023	0.0546561794871779	86.5234225578714	482.010514262717	117.222561834544	0.170322	0.0377515819121436	0.8	1.06240436844924	0.167793098688826	96.3895794599465	0.0480126874735921	0.0163140492349421	0.553519327316798	69620530	-2.99986869193397	-0.774154917443301	0.01445953694394	0.0168894652149076	124.268408018295	0.939050381209765	0.882774996296094	0.852042576908736	0.94423983507081	3.96169117551466	2844600678.60459	0.224654650695334	3.9227403008313	0.018757965080969	1.06854860000001	1.0282092	1.07005424483454	1.03730955633461	0
2002-11-07	0.0532655000000001	24.8071602153892	-1778033600	0.410309020839281	56.0429961912777	0.210242974213616	0.674911501630542	0.238728322741075	28463459.9985805	103.838753491019	-3.35676722712173e-11	-2728477.98019998	0.0570860769230753	77.2516415220565	446.833102475542	103.761249718947	0.08324	0.029087187756468	0.8	1.78397296437386	0.0847409960525797	96.8332741810784	0.0526926345910081	0.0235897663061553	0.591721264426504	69803090	-0.602611081279846	0.153645521371626	0.00823464930939517	0.0283383567224098	54.6835525244403	0.589690979160719	0.785080323917636	0.829721825911702	0.695797319929503	3.63574883770943	2785312441.35596	0.373571984896529	-3.45939636621101	-0.0734830091623145	1.06765220000001	1.0365972	1.05486782988969	1.03497963700104	0
2002-11-08	0.0535206428571429	24.0387238225354	-1825549600	0.494698945595842	54.1325500012465	0.201144395574007	0.614504421940893	0.232914530419158	17994347.8725238	102.358602578256	-4.22357439599292e-11	-3526106.55319998	0.0584159166666651	71.7784896992462	420.905001435287	101.473402813142	0.0614690000000001	0.0204585742711978	0.7	2.10281755999956	0.0625196254701559	97.2984405098999	0.0575544319301614	0.0303826994309565	0.598860262485079	68495420	-3.05740352339329	-0.227095660718529	0.00642450963824544	0.0286570311319515	3.14845394372399	0.505301054404158	0.691820567413143	0.783754739745516	0.507952222748398	3.2591958542759	2782518533.42547	0.230630487076583	-4.20323553945842	-0.0100503851510105	1.06099280000001	1.0392864	1.04132855325979	1.03121061209176	0
2002-11-11	0.0542859285714287	22.6564437067447	-1863793400	0.763834525400193	46.826592523885	0.169525780308923	0.41427112286916	0.228633609396037	2848974.93212414	97.8411347652122	-2.92316663093104e-11	-1075987.35789998	0.0581408653846138	67.1469096566789	399.447848961659	98.1864949556865	0.0300940000000001	0.00234203985607627	0.6	4.67402544735641	0.0314928156833334	98.0428234301756	0.0599735525509183	0.0363008700549489	0.568180513919869	67977560	-6.23270333896144	-0.354897914773005	0.00267134665911748	0.0315062123149805	-52.3995623079143	0.236165474599807	0.539935536475365	0.702481671988799	0.214843265448496	2.58629551965421	2748247916.57456	0.205010336388455	-7.19315681361992	-0.0438779697517305	1.03883800000001	1.036405	1.0177887021732	1.02021031898417	1
2002-11-12	0.0560730714285715	21.5512417898039	-1807845200	0.610574754127943	51.7744310315557	0.125546393662632	0.541719277996976	0.227089152750298	-4397013.07164097	100.782915198385	7.29693435177542e-12	27197.315600019	0.0547093910256395	67.3886056033924	383.007231320605	97.8722946790264	0.014086	-0.0146507947279212	0.7	3.4709782997801	0.0141655484496216	98.3830736965917	0.06501404850854	0.0420435057456671	0.526579892184853	65705990	-6.47123535123382	0.0682103107583636	0.00405828028661035	0.0323754764331608	-36.455395227701	0.389425245872057	0.489765439607595	0.631576261195064	0.206143796432657	2.27108494766892	2745303382.95754	0.114225535920612	-3.01777025563497	0.0311715050818707	1.02270220000001	1.0376856	1.01234046811546	1.01679826098705	0
2002-11-13	0.0567362857142858	20.5899817635851	-1865780000	0.627564208034563	51.2396642283338	0.113413298891737	0.511878068221973	0.219041896656704	-10331517.9147391	100.128485332014	1.40498267017407e-12	767059.31610002	0.0498989166666652	61.6584761140685	368.475062981736	97.0131499537891	-0.00128000000000006	-0.0332993221791851	0.6	3.01085349263619	-0.00128143153417752	98.6907200816963	0.06986389093096	0.0476075827827257	0.47806836337243	64757420	-6.33460708233199	0.282267665291204	0.0047420339999936	0.0320926049904122	-48.6620428174645	0.372435791965437	0.450655557060209	0.571269359816779	0.209427951547069	1.9731237493209	2732835101.05494	0.0642061276184918	-2.00099676786742	-0.0032015037694273	1.00182820000001	1.0351884	1.00764131207698	1.01342457717122	1
2002-11-14	0.0561570714285715	20.1832935772283	-1830351600	0.448883927194675	57.8918294166733	0.173918031632803	0.704001707407134	0.203979884714379	-5817650.20392275	103.957430348382	3.1432833545969e-11	712598.313000023	0.047813833333332	60.3233167879136	353.864905859752	99.6332384131691	0.0550670000000001	-0.0308162656107272	0.6	3.04967820700257	0.0542039231336265	98.5645165281076	0.0752765147055016	0.0531413691672809	0.44385916132692	60662630	-9.22701880020617	-0.677655960232499	0.00444545787127746	0.0316615264597791	11.04819923705	0.551116072805325	0.484142395641915	0.542227038425158	0.367973110075428	2.07558536579633	2755891903.77494	0.0842670519809288	3.4592652778543	0.0445354278159153	1.00567020000001	1.0366612	1.01966254138465	1.01893010859464	0
2002-11-15	0.0551558571428572	19.8056545470399	-1870600200	0.587111656623348	53.9821269260006	0.113403945965194	0.572709094539221	0.184721153590859	-5507473.46590948	101.205600340373	-3.57523844307629e-12	354317.273100019	0.0431223269230754	53.2609224831123	347.983119442646	94.4345865815736	-0.00192100000000006	-0.0267674134799686	0.5	5.98571023889713	-0.00187918034628882	98.6816989614765	0.0765787058820014	0.057828836510225	0.410385050103046	59071320	-10.8787401698875	-0.774561570041946	0.00203165061666963	0.0322967385954726	-19.5150458796956	0.412888343376652	0.460391044886827	0.514948373912381	0.351276386835719	1.95496399303643	2747507854.85701	0.0356956244189968	1.2912989109277	-0.0217064317617564	1.00707900000001	1.0340359	1.0202063609231	1.01935990703197	0
2002-11-18	0.0539313571428572	18.937415005465	-1911744800	0.769684655287255	50.8142879760393	0.053473770098722	0.439039530815093	0.166058938455118	-11585221.9721913	98.9597652657825	-9.18562173407962e-12	-846199.570299982	0.0380737435897421	54.7134831768493	330.166549379253	92.6035210415082	-0.0268930000000001	-0.0125740856600887	0.4	8.11106372089058	-0.0264832733199769	98.9507524633849	0.0750224208141552	0.061267553371011	0.370885754011496	58147040	-12.0207952300066	-0.454132661930153	0.00146598800959146	0.0326083163567617	-58.2006948963323	0.230315344712745	0.3836991448288	0.471198630884521	0.208700172717358	1.68714210202658	2722095312.65162	-0.0589714161872869	-0.413666035111814	-0.0189886192350229	1.01335400000001	1.026096	1.01416557394873	1.01621883302616	0
2002-11-19	0.0531660000000001	18.0585387569052	-1964482800	0.881939720662933	47.0483370436861	0.0203560823252261	0.261725162858462	0.152926521168981	-17213640.0378165	96.3832844148387	-3.1544517985134e-11	-1036778.02199998	0.031026192307691	47.2814267663835	303.606395070184	88.6759905787434	-0.069794	-0.00698303556219678	0.3	-4.38765439061531	-0.0689494376249035	99.3740954636342	0.0697933115207586	0.0629727050009606	0.320019109532921	58057090	-11.0878392167573	-0.24929191421262	-0.00276649617184549	0.0317589468291103	-118.636388780498	0.118060279337067	0.295152856331556	0.412516706033532	0.0604251569276022	1.26603903009397	2706415692.73373	-0.0169844706608308	-2.94489738892561	-0.0245800285665043	1.00861580000001	1.015659	1.00202804929916	1.00922504520322	1
2002-11-20	0.0528088571428572	17.2424393832426	-1912297800	0.776104411287913	49.7903098648679	0.00508847502148576	0.342662891335535	0.141304182073337	-14855644.7745352	97.8237099289884	2.99471622113644e-12	-207196.198999979	0.0228581282051269	45.6048714798102	307.073106357782	97.0625527699013	-0.087082	0.00298616635812738	0.3	-6.77412923177082	-0.083947980533115	99.5597030732262	0.0692022875576234	0.0642186215122931	0.270635334449598	58053380	-10.314312806294	-0.348718492530757	-0.00195253009717409	0.0321345434543579	-82.6309152225879	0.223895588712087	0.271400433791733	0.365477948619599	0.083245404136	1.05310234531015	2719171737.4402	-0.0583620704570688	-1.17721300940139	0.016883463927631	1.00784740000001	1.0048378	0.999485699532771	1.00652976425718	1
2002-11-21	0.0539062142857143	16.8806720977581	-1807677200	0.442317594929467	57.3001864438101	0.0886970071376664	0.696727734409347	0.127615245354588	7913384.70231247	102.453221427799	1.80049271080455e-11	3180940.24150002	0.0155151089743575	49.4353499725003	316.479990733427	103.21971900419	-0.0352170000000001	0.00139684414563575	0.4	21.4142536595793	-0.033085704803608	99.2597253669159	0.0749120346685754	0.0663573041435496	0.243624743063364	61100060	-2.17422324608001	0.790512220750042	0.00052986848262002	0.0350118975749946	18.7475120121753	0.557682405070533	0.366827757551333	0.365927884930177	0.368627502793645	1.28957666426199	2796498345.74276	-0.1764518793997	3.208813857972	0.0514538806877725	1.00848760000001	1.0070789	1.01529246635518	1.0138708980286	0
2002-11-22	0.0507672857142858	16.5447453326653	-1864641800	0.561982812437738	53.7128980439891	0.0147623343810463	0.506724197369937	0.11814703975522	10466575.7921205	100.13763924062	1.44102400438173e-12	2126492.63050002	0.00437949999999865	39.2973019914039	331.619039159791	105.606932664681	-0.077477	0.00107851724439217	0.4	-3.59203400435843	-0.0728575307021449	99.2355730079224	0.0773751089248388	0.0685608650998074	0.222897567298386	60459910	-2.43029072446832	-0.503038990391921	-0.00326943798857953	0.0341636847433494	17.2009161764457	0.438017187562262	0.390557567554976	0.374137779138443	0.423397144388041	1.28723962417285	2770863079.51009	-0.213530573179671	1.37191569480642	-0.0210138608175679	1.00925600000001	1.0081675	1.01857364423679	1.01591909838704	0
2002-11-25	0.0498488571428572	15.7932389449208	-1914498600	0.578991060873723	53.2902355312436	0.0220109580214015	0.476304925173444	0.115920957053141	13064118.5599346	99.7751394297994	-7.51820525986435e-12	-683901.303399975	0.000205230769229292	39.5720429338329	350.380951609566	102.110053083348	-0.00191999999999992	9.86821844263245e-08	0.4	-3.34705739888594	-0.00187585237731141	99.252542090201	0.0783681005460051	0.0705223121890469	0.205522196460595	58586500	-3.57091917397491	-0.0549594849313237	-0.00349015121052189	0.0341467978152332	2.59073252393093	0.421008939126277	0.40070802474541	0.382994527674099	0.436135018888032	1.25031804272748	2781297393.19114	-0.254356576608385	1.09732395979132	-0.00250133083748103	1.01335420000001	1.0133541	1.01990742949119	1.01712926231667	0
2002-11-26	0.0499610714285715	15.0549472844899	-1974564200	0.808624943531292	47.638029424174	-0.00890819584270569	0.16675478591001	0.114214188431537	4251928.99669075	96.2855034119157	-1.50907507791481e-11	-1140727.74199998	-0.00418244871795026	32.044378068752	363.095066117437	98.8454714934139	-0.0275320000000001	0.0032169718834926	0.3	-1.37258605222154	-0.0275204177628922	99.5803138344437	0.0758369389655431	0.0715852375443462	0.177449895323423	58350040	-3.04662583601016	0.104651172754004	-0.0073473226066295	0.0344672301650286	-71.5241897320727	0.191375056468708	0.330930368653176	0.365639808000458	0.261511489958612	0.924811298913397	2747927615.41337	-0.239558555440183	-2.20007007529057	-0.0356949505365913	1.01514720000001	1.0118815	1.00884428632746	1.01159994189546	1
2002-11-27	0.0455115000000001	14.3693907426612	-1902864600	0.496723418266013	50.7519582409211	0.00339376388255486	0.345523037314005	0.115816832510903	5652814.02332306	98.302248110176	1.10527696109885e-12	-365303.429399979	-0.00370628205128343	42.0182000343761	375.862907117855	96.4417148523769	0.0358579999999999	0.00478242308912994	0.4	-20.8374117053483	0.0362740778419837	99.6630547293526	0.0741407128912706	0.0720963326137311	0.15133694888092	58551570	-1.04505314589143	-0.158864821215516	-0.000849876148240273	0.029838969932846	-28.0624048706257	0.503276581733987	0.388379106346779	0.373219574115898	0.418698170808541	0.815735192836731	2770662112.63388	-0.284010807101964	-0.705341381381472	0.0199165258531453	1.01758040000001	1.0127139	1.00808519088497	1.01068486155083	0
2002-11-29	0.0444400714285715	13.6283221552096	-1938722800	0.646341592939151	48.5454488245234	0.0115994294123436	0.245138147061225	0.117661698591977	288003.169579506	97.099546308514	8.54790145629116e-13	459015.448500022	-0.00598016666666812	42.7036116347244	383.714106680308	97.1786772467086	-0.00896399999999997	-0.000890239667372687	0.3	-14.0355989804587	-0.00899137619188939	99.8506070242425	0.0724271965150189	0.0721625053939886	0.12241137412361	56646520	-4.31058133460705	-0.281494224713697	-0.00113523653479376	0.0299520960062848	-41.0854805326643	0.353658407060849	0.376805539918136	0.374414896049978	0.381586827654452	0.609589528849241	2748537522.0584	-0.2794379645401	-2.06404794961907	-0.0140939489520025	1.00669520000001	1.0075914	1.00288346058998	1.0073748867234	0
2002-12-02	0.0460727142857143	13.7187856304072	-2038408400	0.863966097734538	45.4501910608053	-0.0684487117189643	0.103362724402688	0.120246056814124	-21273083.605073	95.4476829615639	-3.17213524822036e-12	-1273846.20369998	-0.00937464743589889	39.5356809448787	381.804013475059	96.9968585467885	-0.026253	-0.00662104719967718	0.3	14.6440031912065	-0.0266512173055966	100.170040700832	0.0656737198600176	0.0708647482871944	0.0857668028649838	59257940	1.71731806424334	0.958039777605372	0.000456478163434225	0.0280947509694209	-85.9724172067495	0.136033902265462	0.296548327367245	0.348459373155733	0.192726235790267	0.278126364983944	2679946935.75788	-0.0870509553176498	-2.88946769493003	-0.0208613448831345	0.996066000000005	1.002661	0.992585640393322	1.00094127095551	0
2002-12-03	0.0430610714285715	13.802787428805	-2095375800	0.87757161216318	45.2559166851953	-0.0994653001599439	0.116480105873671	0.114598128715533	-33883292.3080282	95.8431729157426	-7.15633297289329e-12	-1057766.59169998	-0.0148173012820529	32.7312920200595	385.428201411117	99.279572652807	-0.0729960000000001	-0.0140314507724856	0.3	-6.48488063660479	-0.0725054291283587	100.417645007317	0.0584054337169393	0.0683728853731434	0.0460352312211754	57396080	0.785252253607062	0.0180529117370902	-0.00189926032632279	0.0266208995017263	-134.620460359261	0.12242838783682	0.23850834752377	0.311809031278412	0.0919069800144847	0.00399105280048939	2651464897.2932	-0.186101282012722	-2.13046830981963	-0.0013187840068468	0.985692800000005	0.999523499999999	0.985293426928881	0.995444494418146	0
2002-12-04	0.0425509285714286	14.9287502006535	-2176815200	0.738462497273378	43.3602793827344	-0.10791406253931	0.0651777761614425	0.115958406185481	-28156396.8939052	95.2229007508464	-1.53599280323775e-11	-531883.489899978	-0.0184703974358987	31.9711362523302	387.927704974185	96.394010062339	-0.0627509999999999	-0.0179016992671182	0.3	-4.52740740740742	-0.0634113064588164	100.703566953837	0.0515977080464055	0.0650178499077958	0.00238831270911177	58834370	3.12179350726115	0.340540945089618	-0.00256616909942253	0.0267724157707839	-172.852819067303	0.261537502726622	0.246184732591387	0.289934265049404	0.158685667675354	-0.309487084668103	2680973171.55364	-0.163525437248945	-2.30590858818423	-0.0126123090922141	0.980057800000006	0.997602499999999	0.976376617952588	0.988735131796665	0
2002-12-05	0.0415485714285715	15.9742870602271	-2237664800	0.908058334112368	40.1217002776812	-0.170984390046006	-0.133931664782172	0.102783007759377	-33074763.6612978	93.8331803708912	-2.20157996108389e-13	-1157743.76619998	-0.0219181730769243	26.9413431356789	381.40628955891	89.4801443491584	-0.065311	-0.02664395677875	0.2	-0.918190071390251	-0.0673961201183143	101.102105790896	0.0409792689659128	0.0602101337194192	-0.0487709726233909	59171980	2.34197264079695	0.540891487482153	-0.00744142411162185	0.0233313828366112	-164.826651613554	0.0919416658876319	0.194770377023469	0.258212969040759	0.0678851929888885	-0.72931134394254	2642250980.4423	-0.115693304783119	-3.70775571683164	-0.0229734328945208	0.966099000000005	0.991839699999999	0.963175411968392	0.979287471469999	1
2002-12-06	0.0423967142857143	16.7064017678361	-2176325200	0.7484341404132	44.3358163606533	-0.108265203788128	0.111125327486428	0.103466954946126	-27502063.517405	96.2095461187225	9.39747838264306e-13	-33923.6939999806	-0.021089057692309	33.0668734780521	377.03969475354	93.3791223798598	-0.02049	-0.0248367247946764	0.2	-2.02646628787178	-0.0211789110653732	101.196758287662	0.0323105559685349	0.0546302181692424	-0.0936758111842462	58036720	1.76292695461351	0.421350416983572	-0.00434531666294183	0.0241865396796621	-118.620449220294	0.2515658595868	0.213702204544579	0.243376047542032	0.154354518549673	-0.886025517257016	2659645294.99607	-0.0993450847248531	-0.763335301856221	0.0216371804864368	0.959055600000006	0.982875399999999	0.961204607978928	0.975283022111817	0
2002-12-09	0.0403558571428572	17.3862225677588	-2235346400	0.848197313888629	42.3306597670217	-0.126398839238493	0.0517942613072286	0.111202303625267	-28088056.2975636	95.256571565451	-5.87754908405784e-13	250511.458400022	-0.0220002884615397	32.5381793337935	371.900755492236	92.3606581424345	-0.049944	-0.0222940824226059	0.2	-2.29894807567136	-0.0515303866560628	101.364277415615	0.02189512858634	0.0480832002526619	-0.136308949924036	58611980	0.996288601040583	0.360804010104378	-0.00395733471003535	0.0239793473895648	-110.401697404325	0.151802686111371	0.19306903173351	0.226607042272525	0.12599301065548	-1.10429532019988	2634348808.67607	-0.122995603939204	-1.27171376378887	-0.0134680116630585	0.953549000000006	0.974807499999999	0.955622071985952	0.969678290818759	1
2002-12-10	0.0402537857142858	16.6861104521301	-2158193800	0.583824125144121	48.9231504414882	-0.0604199395848787	0.369172033213304	0.113270163748045	-14926727.5987782	98.6410843257248	1.07171940284579e-11	931212.57320002	-0.0250499358974371	39.8920993512676	377.701491862836	99.1562938955203	-0.0685129999999999	-0.0160231677614656	0.3	13.4800751879699	-0.0676829967059573	101.154648090395	0.0122808879258524	0.0409227377873	-0.162108785375503	60557420	2.64038465982555	0.380449020499434	0.000343533665696077	0.0254108796670818	-44.3941057567798	0.416175874855879	0.267437979440966	0.240217354662005	0.321879228998888	-0.985998463361171	2675070403.41824	-0.0160743937907536	2.1617998036245	0.035301270637878	0.955085800000006	0.970389299999999	0.963212381323968	0.971262783397167	1
2002-12-11	0.0400497142857143	15.9861683560618	-2094818600	0.479067339752578	51.2988587513435	-0.00562770226553186	0.497744109330075	0.113439256551086	6846433.81499767	100.045239443752	5.71901210568175e-12	1735228.47400002	-0.024376794871796	40.5726333892836	390.25099609563	98.5369081243474	-0.033296	-0.00952050501525105	0.4	18.8502486893398	-0.0330187617441275	100.857947826439	0.00439135808540214	0.0336164618469204	-0.170596104057907	60928770	2.18843404212316	0.194277520452893	0.00010904586281998	0.0252597841794919	-8.7748518525939	0.520932660247422	0.351936206376451	0.277456971900154	0.500894675329046	-0.772238912889378	2738445603.41824	-0.0805738607049951	3.18644751961447	0.0136503741442619	0.961745200000006	0.970901499999999	0.972754920882645	0.975004095506773	0
2002-12-12	0.0385952142857143	15.079401904922	-2132153800	0.605732958305758	47.8731704231323	-0.00570509379518891	0.33880539398603	0.113921929607174	11986698.0849233	98.2344552632668	1.92311589331244e-12	67498.5612000229	-0.0243276089743601	31.3080620463003	399.417049786072	97.9999596969208	-0.049945	0.00145399511166008	0.3	-1.36477067645778	-0.0500754922089622	100.79767355623	-0.00594513099809035	0.0257041432779183	-0.174406041226427	59898790	-1.49737920669686	-1.03040389159009	-0.00504585942034038	0.0206167748415999	-13.3383351906416	0.394267041694242	0.366046484815715	0.306986809538674	0.484165835369796	-0.752701280997781	2726000536.75157	-0.0275093216138198	0.941370847946295	-0.0195580613023157	0.968916600000006	0.967507799999999	0.97271328058843	0.974572441778269	0
2002-12-13	0.0390300000000001	15.0144149224624	-2173348800	0.804431710324394	43.6845692157405	-0.0398897492256566	0.140027205650786	0.111832166548097	8494184.27873898	96.1169783304484	-2.09658822429907e-11	-886147.76599998	-0.0216515192307702	32.0361586203931	417.541034818417	97.4308377658206	-0.0397	0.00403984992361547	0.3	-1.28779470918113	-0.041066183926461	100.971489731346	-0.0114475824597757	0.0182737981303795	-0.183867143809269	60187120	-4.023065806724	-0.324113132502347	-0.00544143932167709	0.0209919125991571	-79.8536686153219	0.195568289675606	0.309220419769012	0.30773134628212	0.312198566742795	-0.938523634851895	2707874921.30665	-0.0131249996125212	-1.8905480539838	-0.0266856422540901	0.966867600000005	0.962961599999999	0.964148187058954	0.969562543273129	1
2002-12-16	0.0393361428571429	15.0599442718456	-2110442600	0.770351183770501	44.4694565096004	-0.0333628669523517	0.204239138065254	0.11092056738837	5975649.06238461	96.8531042578046	-2.03525248703628e-12	-406700.359799978	-0.0234616538461548	31.6961426724537	432.333921675116	97.9552059371037	-0.055707	0.007539754760693	0.4	-1.48365875394961	-0.0569339719279008	101.049658421179	-0.0154431530397929	0.011530407896345	-0.194135795451611	61320000	-3.04143150774371	0.232489831673529	-0.00497321430885241	0.0211352285614453	-73.4774556038046	0.229648816229499	0.282696551922507	0.299386414828916	0.24931682610969	-1.04292303840592	2706591634.82665	-0.178989038611626	-1.38349629520036	0.00404873785170558	0.968148200000006	0.960848599999999	0.959718791372636	0.966162080859833	1
2002-12-17	0.0387647142857144	14.8879264185703	-2054777200	0.639715078991954	47.4905158078273	0.0137443603538118	0.362296999517484	0.109854212894656	12597149.7950616	98.5363290508674	2.24324831044059e-12	530734.98310002	-0.0238310833333343	38.3102176639852	450.71575601778	100.734865311207	-0.0268930000000001	0.00543772855269024	0.5	-9.54909711616206	-0.027470654663846	100.954947735646	-0.0146492181905781	0.00629448267896038	-0.198179036699375	62046040	-3.22251683547063	-0.0760785293030999	-0.00136225123050115	0.0198797364018857	-39.3924669414023	0.360284921008046	0.308559341617687	0.30244405709184	0.320789910669381	-0.992137129574877	2739150975.29737	-0.0725844544804488	-0.220552473094976	0.0153693683120522	0.965587000000006	0.960336399999999	0.961674860915091	0.966057520703499	0
2002-12-18	0.0393223571428572	14.9982780045198	-2092452600	0.929390684182981	42.0301509885648	0.00792181349526044	0.102282560299367	0.116302084546196	8886059.8546834	95.4220762566742	-9.36923841551779e-12	-205271.758299981	-0.025633000000001	31.0753881926832	468.921353660629	99.5898686234552	-0.0390590000000001	-0.00416227548349858	0.5	-1.35838204789742	-0.0410142732130567	101.168170208607	-0.0187925860220722	0.00127706893875386	-0.209473368298496	61292910	-5.86406282737643	-0.643477807213149	-0.00521482447158759	0.0206099873745935	-107.054224108741	0.0706093158170187	0.229242666350797	0.278043593511492	0.131640812029408	-1.21072470201624	2716126712.76577	-0.158705419028858	-2.83429609367769	-0.0344049634323451	0.953805200000006	0.957775199999999	0.952093573943394	0.960034516939227	0
2002-12-19	0.0411080000000001	15.9120890698089	-2179332400	0.94732572802289	38.5657976516073	-0.0545269026325228	-0.0359406536799701	0.125467733904193	-11292901.2727385	93.4057151263347	-6.34116130561996e-12	-1644298.60209998	-0.0272091089743599	29.4412297467255	468.805731905103	94.9833013497858	-0.061469	-0.01476389163972	0.5	-1.18025669033315	-0.0654176466035438	101.529718569378	-0.0241933870972975	-0.0038170222684564	-0.232487835423045	63027650	-1.03945515889377	0.884953282443597	-0.00602904352635079	0.0212002570420442	-156.828437121384	0.0526742719771104	0.170386534892902	0.242157907305295	0.0268437900681145	-1.56722545363245	2650437686.74607	-0.047377980404951	-3.9241909413896	-0.0257221573973339	0.941127200000006	0.955021899999999	0.937809049295596	0.950799150223004	0
2002-12-20	0.0395263571428572	17.3418290778215	-2258856600	0.783296814427777	38.0185108395733	-0.12317579131448	-0.0122742312983562	0.126981243035575	-20171626.3566923	93.6920309029163	-1.67031586737119e-11	-1181900.65909998	-0.0280668974358986	30.3965012068471	463.226345048005	95.8643961556746	-0.053145	-0.0182591569154064	0.4	-1.52745971162002	-0.0570397972116053	101.813197490355	-0.0329713573205823	-0.00964788927888159	-0.261859501587969	61772830	1.5861945233363	-0.225959855381436	-0.00485620457774891	0.0207794705469467	-210.636594658663	0.216703185572223	0.185825418452676	0.223380411021089	0.110715433315849	-1.86471065554796	2644320001.40306	-0.00437080095803855	-3.18383385308316	-0.00423445970027565	0.932803200000006	0.949835399999999	0.927005366197064	0.942544395637003	1
2002-12-23	0.0404957857142858	18.6694447995475	-2227400000	0.594429462329345	43.0916547361894	-0.085842857482191	0.19769986492223	0.12068948113166	-16526661.507143	96.4970947927073	8.97968939745561e-12	199720.94310002	-0.0243563589743602	35.069443845254	460.951517258124	94.8298894207134	-0.00896399999999997	-0.0215231099566503	0.5	-3.3086018237082	-0.00961509771103791	101.780930425334	-0.0376262529113068	-0.0152435620053666	-0.284129038562064	60497430	-2.68155325429924	-0.593870356350433	-0.00299402136281546	0.0222379436130205	-120.33847070427	0.405570537670655	0.259073791525336	0.235278204522504	0.306664965530998	-1.89059963551431	2666997634.27951	0.0464380137907594	-0.44656261596181	0.0244512666060466	0.928193000000006	0.948170599999999	0.927273244131376	0.939865232793911	0
2002-12-24	0.0378760714285715	19.9022308268645	-2237235000	0.664587898196528	41.725425304746	-0.100171286808649	0.14725159206229	0.113843188488603	-14037944.78723	96.1466934425141	5.59569039145913e-12	311548.74380002	-0.0235888397435908	39.6424138325397	453.16748879611	92.7048717535086	-0.037779	-0.0253623503817885	0.4	-3.74593069272858	-0.0402655277028306	101.806190679135	-0.0410857719181295	-0.0204120039879192	-0.302805375911053	58496340	-9.52067768328677	-2.11391173354702	-0.00273971026928991	0.0221406090384478	-97.7584101497247	0.335412101803472	0.284519894951381	0.25169210133213	0.350175482189883	-1.96062527575475	2664104320.16322	-0.138467695766585	-0.783120212054916	-0.00901324950535588	0.918972400000006	0.942279699999999	0.924676829420917	0.936159554104109	1
2002-12-26	0.0377740000000001	19.7757766279538	-2215879400	0.642996797572897	42.3313930286703	-0.0844302187743242	0.193172122497677	0.111304411777107	-14684870.463583	96.7416985966544	1.97363178510553e-11	-13581.6638999786	-0.0223780384615396	44.7124482195249	446.26573553254	94.7992556264972	-0.022411	-0.0201843290225859	0.4	-23.5699174952404	-0.024015045319287	101.769551280171	-0.042210481770581	-0.0247716995444516	-0.316149461651782	56560840	-13.6143313979182	-1.04709124550718	-0.000918431824191942	0.0214079593653347	-57.1270840516068	0.357003202427103	0.308680997443288	0.270688400035849	0.384666192258166	-1.97258517811422	2652418733.50817	-0.0793809316545667	0.278561832098617	0.00278247072048508	0.916795400000006	0.935300299999999	0.923799886280612	0.933593453357907	0
2002-12-27	0.0362434285714286	20.1830489539922	-2235888200	0.826470588235294	38.6531593777937	-0.12305735832478	0.0244026710443037	0.109657054663743	-16984835.4801393	94.9871294826693	-2.97010562352564e-11	-190449.268799978	-0.0259079487179499	38.4506437912414	442.639654660263	95.0641909657472	-0.0781179999999999	-0.0142758095497818	0.4	-1.93506852813485	-0.0832111576020727	101.922487669714	-0.046203983172844	-0.0290581562701301	-0.332455758004746	53976300	-17.3114245264513	-1.12025346085214	-0.00416733053828362	0.0211326721052108	-111.878999285205	0.173529411764706	0.263630468883761	0.268335756318487	0.25421989401431	-2.14599065424894	2637818494.83096	-0.121929650374351	-1.50616711267105	-0.0238948416449078	0.915002400000006	0.928064799999999	0.915958257520408	0.927535552747379	1
2002-12-30	0.0363965	20.9112312828514	-2197127800	0.821068599359514	38.8217131202274	-0.0849597836063239	0.0760007876990556	0.109328303776218	-12270447.0003462	95.5161432561914	-8.20299421574592e-12	-205383.084199979	-0.0298893717948729	39.7518342313544	446.130635362153	94.7474917443157	-0.090924	-0.010227041502838	0.5	-2.72997227274083	-0.0961497804361622	101.998298962094	-0.0538798306210868	-0.0340224911403214	-0.348212341016918	54121410	-16.8552438288715	-0.42049759451216	-0.00316092136353506	0.020995355402753	-117.633211782365	0.178931400640486	0.235397446136002	0.257356319590992	0.191479699226024	-2.25427392635266	2656574656.41702	-0.165750558161312	-1.28621121388018	0.00071175131017237	0.914106000000006	0.923454599999999	0.910944171680272	0.922695634066037	1
2002-12-31	0.0348148571428572	20.931229436799	-2146946200	0.680768582504635	43.1876520600068	0.0188445610746409	0.266334451625777	0.105153974208626	934177.147749901	97.5626664829321	5.54751562325634e-12	430134.346600021	-0.0295035128205138	36.8002964021568	454.48356622766	95.0265486175767	-0.0550659999999999	-0.00884593835691534	0.5	-1.46133112986681	-0.0582814103869266	101.858015689429	-0.0580099974963877	-0.0388199924115347	-0.355229990853967	51646210	-14.2377166868794	-0.430136853181409	-0.00440754902929554	0.0189102222338502	-73.4018566492645	0.319231417495365	0.26334210325579	0.259351580812591	0.271323148142188	-2.17188402059012	2699411938.93025	-0.165333957791619	0.315045624218439	0.0183103087469199	0.912057000000006	0.920124999999999	0.913150781120181	0.921762609690394	1
2003-01-02	0.0356311428571429	19.4361923251826	-2101589000	0.427153210854542	50.1176034636323	0.072658647674227	0.592025701970855	0.100322928728888	12959098.9825644	100.886132918075	2.76537474755937e-11	1100201.42680002	-0.0264702564102575	34.646984318369	471.512807635137	101.578573335005	0.000639999999999974	-0.000697728801753892	0.5	-2.66002574454391	0.000675577274786357	101.430522496852	-0.0593105361505117	-0.0429181011593301	-0.34388448226369	51065700	-12.8857822437387	-0.33450368860575	-0.00304656714839438	0.0208982456584864	31.9946698475236	0.572846789145458	0.366510331885679	0.295071164503621	0.509388666649796	-1.82435461536865	2725672191.38395	-0.121355832911321	3.23178725705757	0.0322713454076229	0.917691800000006	0.918332099999999	0.924653187413454	0.926470862473959	1
2003-01-03	0.0346107857142858	18.0479435786817	-2064725600	0.20672994880546	51.4738892321776	0.0768443091167915	0.663609940418705	0.0998259866868955	23542298.7179766	101.592023044368	5.39500029839896e-12	800507.963500021	-0.0235683525641037	40.82395704557	518.892594044941	104.929501561744	0.00320100000000001	0.00394948656783572	0.6	-11.3581514762517	0.00336077245501002	101.030866659857	-0.0572602641389339	-0.0457865337552509	-0.318335423713667	48836900	-13.2177059803637	-0.0127173924777217	-0.00118051713623739	0.0204911601103146	75.8487873984028	0.79327005119454	0.508763571655299	0.366301966887513	0.793686781190871	-1.47660246423773	2756029928.35175	-0.112694511300776	3.2809263656242	0.00673393303192925	0.924094800000006	0.920445099999999	0.93445579160897	0.931487251115057	1
2003-01-06	0.0346107857142858	17.8406228730134	-2064725600	0.315519684894443	51.4738892321776	0.0236391702068785	0.648776282680206	0.102543555932518	3404170.46678925	101.498599084411	9.66730161461464e-12	118018.175100022	-0.0232728141025651	52.2326070335546	542.609799245671	105.374763363736	-0.0115259999999999	0.0106164398214978	0.7	5.71073167869506	-0.0120085958570422	100.719698757953	-0.0568945515128622	-0.0480081373067731	-0.284519758498925	50676080	-2.96710873727151	0.862900709743286	0.000700391915949537	0.0191708309354404	135.256722193456	0.684480315105557	0.567335819472052	0.43331325108236	0.835380956251437	-1.18752221576617	2666209790.05305	-0.187137908510774	2.68777575169936	0	0.934852000000006	0.924927199999999	0.940990861072647	0.935591569094138	0
2003-01-07	0.0348149285714286	16.5957612773886	-2150311800	0.344978005190406	50.6750314681416	0.0421130108224213	0.620101329677294	0.101962900767048	4204171.79476404	101.192523549084	-1.23160076507661e-11	-136980.713099979	-0.0196361538461548	50.5389134550922	562.918515334573	102.48445531354	0.0179290000000001	0.0162645389572579	0.7	9.3486	0.0190355951202928	100.508352857176	-0.0557195860118728	-0.0495504270477931	-0.247938911471113	51888410	2.43292233905165	0.307879327191731	0.000170957884247068	0.0191733518567183	63.6253170794514	0.655021994809594	0.596564544584566	0.487730348916429	0.814232935920841	-0.974845016168335	2703348838.43384	-0.2188374114853	1.42290297806968	-0.00336077245501002	0.944840800000006	0.929473399999999	0.944280574048431	0.938367647440658	0
2003-01-08	0.0340441428571429	15.4398183671656	-2207723000	0.521755535513795	46.0557918035368	0.056332332383579	0.427002545786043	0.101901947742702	1921753.30808687	99.2158690694848	-3.09356375585251e-12	-688386.58349998	-0.0154289935897445	42.3207615551931	579.720606935371	101.323242166258	0.022411	0.0187837766823593	0.6	-3.29039939839573	0.0243491953060242	100.522590698036	-0.0545364640109595	-0.0505476344404263	-0.218393406908701	51807910	2.42463987718103	0.0308806372441914	-0.00237831330183711	0.0193519524460596	24.1794237442785	0.478244464486205	0.557124517885112	0.510861738572657	0.649650076510024	-0.960270427351273	2692718016.80044	-0.240000489357498	-1.1660306001481	-0.0204085572116026	0.947658200000006	0.929857599999999	0.940070716032287	0.937146438815084	1
2003-01-09	0.0334972857142857	14.8445065165653	-2153909800	0.445151018755406	48.2568976684385	0.00983344787393432	0.529939911407231	0.0976084145690147	-1021331.40356159	100.30752544144	4.83979767046004e-12	-327435.33199998	-0.0113162307692316	48.9573820457963	599.213114731143	101.944479993406	0.034577	0.0150243900995462	0.7	5.10930532738792	0.0374786531346889	100.446442948343	-0.0527055052408856	-0.0509792086005182	-0.191034106222865	50640940	1.87860553745211	0.356511428657122	0.000675580870525367	0.0172700742509473	59.8865583791383	0.554848981244594	0.556366005671606	0.52602982760564	0.617038361803539	-0.867230144678821	2685029904.29378	-0.133023235177248	-0.676544564837328	0.00889499812838911	0.946121600000006	0.931906699999999	0.940038810688192	0.937660722666887	1
2003-01-10	0.0309972857142858	14.2520494467454	-2110134600	0.421582521948795	48.9471035957582	-0.0364151605247597	0.590852108679394	0.087478623239965	1720666.61177778	100.846112036019	-2.27524398517882e-12	280024.682000022	-0.00900540384615456	52.016803684016	627.454772042239	104.694232317903	0.014727	0.0104478984582457	0.7	2.07049150036955	0.0157482222421251	100.358569111604	-0.049882543299279	-0.0507598755402704	-0.16505856082184	49660940	-0.0317560781224652	-0.685458107177897	0.00268405955118664	0.0155548954033717	45.3306804825697	0.578417478051205	0.563716496464806	0.538592050558695	0.613965388277027	-0.762678866441158	2702277381.38003	-0.180043715277377	-0.316015246572387	0.0027208357134828	0.943816600000006	0.933955699999999	0.940871207125461	0.938547136727453	0
2003-01-13	0.0297728571428572	13.3560362598638	-2154870200	0.496567461654744	47.4143930665916	-0.0237084750837707	0.550826832643228	0.0775092770257422	2685968.83516407	100.422137823602	-9.65257065960837e-13	-72851.4877999799	-0.00672734615384696	54.6517837724324	641.329794972812	103.980060294189	0.017289	0.00292813702001735	0.7	2.16662235649547	0.0186283472163938	100.340903081447	-0.0460454245839499	-0.0498169853490063	-0.143179495438439	50030960	-1.42734115340572	-0.575291772628368	0.00254914181569377	0.0156274590138156	27.3896797055657	0.503432538345256	0.543621843758289	0.540268648291893	0.550328234691082	-0.721009439756704	2702277381.38003	-0.0898484171663246	-0.622682048482256	-0.00613312453108721	0.940359000000006	0.937605499999999	0.939505138083641	0.93822456641337	0
2003-01-14	0.0292625714285715	12.5240240149023	-2201585400	0.508901491445132	47.0616282325189	-0.0182272258198773	0.544454030522127	0.0754216534024662	-9823.82226848602	100.346808185302	9.75582433554778e-13	-158826.71699998	-0.00555757692307779	55.7535075523108	642.86138135634	101.953869157901	0.013446	-0.00403046926794476	0.6	3.80212633602896	0.0144774802486999	100.333829231852	-0.0441781611544154	-0.0486892205100881	-0.125153251581278	50306970	-2.22924216797037	0.39546077547055	0.000683419627430919	0.0142732625126102	26.8226428599778	0.491098508554868	0.526114065357149	0.535550453980312	0.507241288110823	-0.69105805412214	2689535791.25657	-0.0703708747590985	-0.431679281186255	-0.00136839624720883	0.937285400000006	0.941063099999999	0.938167425389094	0.937727736156394	0
2003-01-15	0.0306067857142857	12.1214010366034	-2294367600	0.619869245804408	43.897246581117	-0.0368168671949683	0.395190180061444	0.0733821438984945	-6201736.76201582	99.253722845779	-3.78304321303008e-12	-564578.513099979	-0.00230262820512916	48.206871827849	633.987216932066	97.5000474854853	0.0236919999999999	-0.00636367502980288	0.5	4.64220120140855	0.0259760845109248	100.430236299692	-0.0423559949117681	-0.0474225753904241	-0.114598004218824	51800770	3.90467734384788	2.24430735920835	0.0004443504419203	0.0144740567475588	-30.39070509749	0.380130754195592	0.47745296163663	0.516184623199085	0.399989638511721	-0.75786251010439	2668448793.4329	-0.0460434615222743	-1.18693981207036	-0.0123962373826828	0.935748600000006	0.941703399999999	0.933433950259396	0.935225784127959	1
2003-01-16	0.0307088571428572	11.941269990953	-2154600000	0.50272966233066	47.8811456826445	-0.00186451755336004	0.601015245589773	0.0684626563301839	9231053.98159409	100.719948485193	-2.94713302653836e-13	315548.883300021	0.000952275641024625	55.3515196862446	615.17608260871	98.1208748706844	0.0352169999999999	-0.00595809408583532	0.5	3.18997799642962	0.0383455368828403	100.380795549824	-0.0423486106877861	-0.0464077824498965	-0.104155056662403	56005880	13.7523625167877	1.87866704291938	0.0011858355516729	0.0148639090433876	-14.0079551762632	0.49727033766934	0.484058753647533	0.505476000015234	0.441224260912132	-0.698128398042464	2737062496.37034	-0.0435913008048696	0.0342304976992226	0.0130812036820879	0.934980200000006	0.940550899999999	0.934333633506264	0.93539073246833	0
2003-01-17	0.0313014285714286	11.9880296608088	-2221290400	0.82331815249521	39.5943551228135	-0.0349789590238614	0.103873144242827	0.0696693616252794	-353469.974072456	97.2950959591214	-4.08149529767405e-12	-260055.468399978	0.00263102564102458	52.5365319812907	607.638339923097	94.6309512704114	-0.014727	-0.00904825722804873	0.4	6.11662155707692	-0.0161803045542341	100.649960516895	-0.0459374098656488	-0.046313707933047	-0.106913720242374	57456630	12.1612494096882	1.20388883774459	0.000331837309846824	0.0166360493746871	-103.02083400171	0.17668184750479	0.381599784933286	0.464183928321251	0.216431498157354	-0.927808563450139	2675931250.63739	0.0202202076146163	-2.88138309830984	-0.0362155326901545	0.927040400000006	0.935428499999999	0.923834755670843	0.929471872019542	0
2003-01-21	0.0318116428571429	12.2345226585307	-2284654400	0.925534087659818	38.4905487224553	-0.0281505999398007	0.0567022086152483	0.0726480051451505	-17804924.0825195	96.8031310369592	-3.52324944763591e-12	-1272568.66519998	0.00208925641025526	51.158049740903	590.326111711187	94.4107439581011	-0.049944	-0.0114935501353998	0.3	11.2085907619889	-0.0541421456204608	100.889408620868	-0.0481665321836757	-0.0466842727831727	-0.119128481727038	56280840	10.3983109310062	0.491496769939847	-0.000124329841663384	0.0167122068465253	-150.923394452327	0.0744659123401819	0.279221827402251	0.402529894681585	0.0326056928435841	-1.14274082536335	2618750898.52375	-0.0200608219541881	-2.65017578434239	-0.00569049565860383	0.919228600000006	0.929793799999999	0.915127837113895	0.923697713470535	0
2003-01-22	0.0315055714285715	12.9651764480741	-2338439600	0.945732164731129	36.5694896949782	-0.0497907216959165	-0.032724126031491	0.0772782606360704	-29960663.701201	95.9226169179327	-7.1548492893956e-12	-403372.152399978	-0.000127173076924336	45.746620327015	570.125672580399	95.3951640689486	-0.065311	-0.0150597847936391	0.3	-3.16508982672478	-0.0709116295864685	101.140118032645	-0.0489435681695468	-0.0471361318604475	-0.139376613152908	54993890	7.76671939785466	0.0693499107427478	-0.00215749649266514	0.0159907584189544	-196.183607603999	0.0542678352688706	0.204237163357791	0.336432317573653	-0.0601531450739341	-1.3772693671688	2589556291.96375	-0.086140337293057	-2.77841336193806	-0.0100355509340784	0.909880200000006	0.923582799999999	0.906335224742597	0.917343583748619	1
2003-01-23	0.0308931428571429	12.9450350887056	-2281375600	0.769406804607306	42.9243870858196	-0.0650968555357147	0.243280669366865	0.0794809244032418	-31219318.597559	98.0351670160981	5.49760904423105e-12	288745.44160002	-0.00249545512820648	46.3112576521528	556.150328053083	96.5258650496024	-0.0467420000000001	-0.0161038997712792	0.4	-1.58288012129602	-0.05023351349333	101.128390671518	-0.0485279860026587	-0.0474145026888898	-0.155569637722408	56274260	5.98863260586942	0.229604515856579	-0.00300780525059784	0.0142059332055415	-104.562198640328	0.230593195392694	0.213022507369425	0.295295714172244	0.0484760937637876	-1.3859394851047	2593732086.80752	-0.0171743115818015	-0.234683106335052	0.0206781160931385	0.906550600000006	0.921149599999999	0.906663149828398	0.915520932157961	0
2003-01-24	0.0326278571428572	13.8237642967038	-2357742800	0.859324481790878	37.7304129059134	-0.0778791983258344	-0.00833148575479759	0.087183169701882	-34822664.8193903	95.6605733991945	-9.844188735478e-12	-374835.143199978	-0.00551232051282191	40.7862214073132	527.894069469769	93.7499469516284	-0.067233	-0.0217235790794494	0.3	-0.688685177218122	-0.0733318103567593	101.330973642057	-0.0510996793870696	-0.0481515380285257	-0.176928750146543	59600870	6.87303450193318	0.728334095717496	-0.00535557325216553	0.0151525734797871	-144.190926294531	0.140675518209122	0.188906844315991	0.259832757553493	0.0470550178409864	-1.58373478318062	2571270960.66077	0.0962083817695247	-2.11613660784519	-0.0264590693184393	0.896049400000006	0.915514799999999	0.898984433218932	0.909722035401968	1
2003-01-27	0.0344135714285715	13.8301931260849	-2259891200	0.597511857063234	44.2138396883368	-0.0539869610992578	0.276531855933707	0.0896950420740619	-29671272.8312402	98.0398361027184	6.24068908428676e-12	129156.302800023	-0.00541387179487318	40.39620930708	503.708769140974	96.5823096950916	-0.026894	-0.0170715415110515	0.3	-1.59652961530633	-0.0292918816794775	101.252710581456	-0.0493361655880642	-0.0483884635404334	-0.191282484659305	63425670	9.89522793070993	0.0022344457560699	-0.00364751576378445	0.0170337168479834	-76.0772625820216	0.402488142936766	0.260100610522916	0.259922041876634	0.26045774781548	-1.53757989661493	2583935549.92849	0.312413360003256	0.808504506217534	0.0236313714656792	0.896433400000006	0.911736899999999	0.900908622145955	0.908819301692519	1
2003-01-28	0.0344135000000001	13.3619543455366	-2188327400	0.2598031643754	51.6124624504045	-0.00910895616900257	0.614629739850559	0.0881003714278927	-14330885.3995914	100.979966600726	1.14641477325128e-11	2064821.82060002	-0.00597215384615524	48.5307574629155	486.715065323657	99.7946535085281	-0.00640399999999997	-0.00864526173388305	0.4	-12.5619426533132	-0.00683626122935661	100.893181031028	-0.0436694605428285	-0.0474446629409125	-0.188584369415512	66003420	9.08454696630483	-0.178934695675473	-0.00113306171681647	0.0194998896847243	26.0844019244514	0.7401968356246	0.420132685556811	0.313325589770026	0.63374687713038	-1.23257449355871	2625794049.63528	0.237564907280777	3.42867398681388	0.03135061857851	0.903604800000006	0.911416699999999	0.911796081430637	0.913319610475698	1
2003-01-29	0.0365617857142858	12.9651038842828	-2095066400	0.119460842188115	56.4503066919426	0.0166209710406937	0.869718953535349	0.0857018352912875	7769396.51135302	103.09702389092	1.04488596197767e-11	2076055.80210002	-0.0066494230769244	56.2692826942765	478.05831196948	103.464950588062	0.013446	0.00390981441385908	0.5	3.31988581748274	0.0141649695430825	100.40028927584	-0.0364191943472263	-0.0452395692221752	-0.166236652086371	68728450	10.7036991959441	0.485162607790457	0.0020246086385724	0.0197522039037527	97.6734229515316	0.880539157811885	0.573601509641836	0.400084229727296	0.920636069470915	-0.785454226196403	2679421327.95945	0.409050541112052	4.7841745149712	0.0237220664859219	0.917051200000006	0.913465699999999	0.926524720953758	0.921076408571025	0
2003-01-30	0.0383985714285715	12.6839720366837	-2196831000	0.51506090701945	47.5308481301842	-0.0798840118810456	0.359743026362718	0.0840653154964132	-9236415.67023563	98.8881589388032	1.68872984810044e-12	-942375.620199978	-0.00874685897436023	48.4425866184476	448.58258076769	97.9479411579338	-0.0198499999999999	0.00675831254924678	0.5	-8.09462151394424	-0.0214174910829081	100.401537243426	-0.0344551024743627	-0.0430826758726127	-0.14796278893261	71307600	12.5975941230751	0.637143512739211	-0.00153197279184557	0.0226783149116542	56.9500064152068	0.48493909298055	0.544047370754741	0.448071943403111	0.735998225458	-0.764764579588051	2585485195.61807	0.478371603176768	-0.0116499299642014	-0.0417155851570778	0.918972000000006	0.912761299999999	0.923324147302505	0.920321243376294	1
2003-01-31	0.039266	11.873637045074	-2111524800	0.490438511311304	48.1097844589171	-0.0816553162990656	0.40716715944578	0.0839315716640479	-10264708.3221421	99.3152421630189	-1.14878389261273e-11	-1878177.16659998	-0.00976066666666797	46.6531186321356	437.280492003909	101.843854427765	-0.016008	0.0162469440477645	0.5	-8.09462151394417	-0.017259950969185	100.371233451007	-0.0318047099763348	-0.0408270826933571	-0.13178883156425	73305050	12.176450305624	0.667179689519376	-0.00152708017750445	0.0226793112160783	-9.52253285947927	0.509561488688696	0.532552076732726	0.476231987846316	0.645192254505545	-0.717714919609314	2605957250.50258	0.349982248630561	0.046424379762938	0.00278914386651434	0.926143400000006	0.911096399999999	0.92204409820167	0.920169017307876	1
2003-02-03	0.0393680000000001	11.8075218174557	-2045328600	0.305746507580929	52.3563178826668	-0.0956108889736053	0.6641878433618	0.0821719950032914	-7946746.9300909	101.474365910881	1.29025533187706e-11	745049.09010002	-0.00927226282051408	51.7963983577983	433.332689916481	104.564928251091	0.014727	0.0195606147851548	0.6	10.4740374129686	0.0158131907858465	100.160984270899	-0.0280775784396937	-0.0382771818426244	-0.109911322246847	74771690	9.77821247122712	0.391853454256132	0.000401956098843993	0.0233963301097093	82.3450244914629	0.694253492419071	0.586452548628174	0.512972174773602	0.733413296337319	-0.506507897676634	2613050173.33258	0.314432062076316	1.12674392319035	0.0206769043723486	0.932930800000006	0.914682099999999	0.92759406546778	0.923537195979172	0
2003-02-04	0.0394383571428572	11.641259041191	-2124682000	0.342684908327004	51.4494490433883	0.00193012260583892	0.65501435637439	0.0729098348520586	6347609.67011261	101.16407422896	-3.14311951346761e-12	483376.619600023	-0.00987155128205253	46.1676140715716	438.220793813811	105.187285513361	-0.00128099999999998	0.0158500922108929	0.6	13.3398504273504	-0.00136933241064341	100.039490050347	-0.0232579954827942	-0.0352733445706584	-0.0870512613796226	73857700	9.13527936164915	0.529841700679754	0.000207280372437081	0.0234235087605494	50.8855512355227	0.657315091672996	0.610073396309782	0.545339248618995	0.739541691691354	-0.368608779523671	2669060878.38075	0.232748710054859	0.171550847521105	-0.00410131951440204	0.933187000000006	0.918395899999999	0.93001337697852	0.925594433073868	0
2003-02-05	0.0396934285714286	12.2035895705984	-2180085600	0.435030910192191	49.1570718407201	-0.0604235116002198	0.519665377129461	0.0709962926283705	-1533337.86688471	100.26362836636	9.95097791479251e-12	-418513.670399978	-0.00896451282051391	52.7991934070806	431.357583555247	101.975931287673	0.02241	0.00538746979634803	0.6	11.0692375886524	0.0245187011839481	100.038981641923	-0.0195973035225793	-0.0321381363610426	-0.0684967649758117	72348570	6.02642798181383	-0.51561023745791	0.000353378011334504	0.0233456139679867	77.5583252223661	0.564969089807809	0.595038627475791	0.561905708237927	0.661304465951518	-0.33920229345864	2615917745.26075	0.257738577587368	-0.710046641300622	-0.010327499095563	0.927040000000006	0.922045599999999	0.928424584652347	0.925531263424073	0
2003-02-06	0.0387750714285715	12.0350771376442	-2224873000	0.447337300862409	48.8447370145709	-0.0493246857340386	0.507884752466345	0.0704874231866073	-3221040.18736649	100.166625109764	-1.17143503195095e-11	-294739.724999979	-0.00766333974359101	43.8664034997658	435.776070907281	104.565274714331	0.026253	0.00510356629251559	0.5	-52.0290858725759	0.0288248246666705	100.04991755996	-0.0175972801746886	-0.0292299651237718	-0.0539916067538448	71717380	2.25796250428242	-1.1380541934199	-0.000685947081259273	0.0230533349287107	19.9646574797887	0.552662699137591	0.580913318029724	0.568241578168526	0.60625679775212	-0.323334088216864	2621969272.19707	0.195133444999027	-0.276390329702383	-0.00138437217588148	0.928448800000006	0.923710399999999	0.926938723101565	0.925246851892424	0
2003-02-07	0.0389987857142858	11.5165349566373	-2292298400	0.619713299554855	44.5727078715794	-0.0760602161023986	0.245951770861273	0.0686743779112538	-15466344.8215017	98.4039729643709	-1.64453088895281e-12	-633098.934299979	-0.00577936538461665	43.8299250792349	436.408644356146	100.141584978066	0.017288	-0.000207289235772829	0.5	8.53685326869175	0.0192652666508187	100.225762755641	-0.0194451816997127	-0.02727300843896	-0.0497197137573679	72397990	1.78729007146049	0.0109607869988473	0.000468568844677799	0.0215262284022874	-16.9344028514635	0.380286700445145	0.514037778834865	0.550173645057306	0.441766046389982	-0.462074853898875	2574897768.99819	0.0857095749380674	-2.01961616226439	-0.0195951089499302	0.925759600000006	0.925951499999999	0.919971815401043	0.921754333366528	1
2003-02-10	0.0395089285714286	10.9417958085527	-2250326400	0.496591706646413	48.0665684052282	-0.0840978489251068	0.464678246430849	0.0666676139569038	-17631537.1792064	99.9233808807594	-2.52432188125415e-12	-335688.282299978	-0.00371071794871913	48.9573488993573	433.101755720742	98.4225088397133	0.011525	-0.00604324457554445	0.5	4.03151300995824	0.012622261008017	100.231731238009	-0.0206583984920424	-0.0259500864495765	-0.0467158875089413	72307830	-1.61778397957453	-0.41189314753094	0.00188345459275226	0.0217413192382064	-10.2432676152283	0.503408293353587	0.510494617007772	0.536947302374128	0.457589246275061	-0.455046455530284	2580658722.11118	-0.0535896957176192	-0.623291841831281	0.0140351104503367	0.921789600000006	0.927360199999999	0.919595876934029	0.921225181845341	1
2003-02-11	0.0399170714285715	10.5842050091624	-2250326400	0.496591706646413	48.0665684052282	-0.0929377330227498	0.476092439015347	0.0648654564123699	-19903973.4591503	100.020889300748	5.32564879232909e-12	268746.716000021	0.000578532051280889	53.7107480303177	425.955795417406	96.1151988217351	0.0352169999999999	-0.00794643518094435	0.5	3.13016910260887	0.0390813303264563	100.232149909601	-0.0217782909157315	-0.0251157273428075	-0.0445032105853893	72130800	-4.52923006646144	-0.266681446618382	0.00259669479429274	0.0214842717443859	3.45705346078882	0.503408293353587	0.508132509123044	0.527342371290433	0.469712784788265	-0.444383464697751	2568203920.71768	-0.0778202029693741	-0.266435495402256	0	0.918588000000006	0.925887499999999	0.919345251289353	0.920792239691643	1
2003-02-12	0.039305	10.2521564097286	-2193154600	0.471959696570556	48.8151825973054	-0.0942317009058294	0.531905721236396	0.0626858070890349	-22507819.2494721	100.376731661648	4.67323549372247e-13	73237.07580002	0.00322191025640883	53.7653729406218	437.475234334252	100.488917826251	0.0166489999999999	-0.00502288139784415	0.5	4.54577157802964	0.0182343649526098	100.204244587208	-0.0223687300760599	-0.024566327889458	-0.0417414135150396	72653630	-4.78950578129107	0.00188732484910403	0.00130347311991669	0.0208332479752215	6.34772576015548	0.528040303429444	0.514768440558511	0.523151061046459	0.498003199582614	-0.408803225162169	2552610288.61891	-0.204539163341094	0.255515341257036	0.00278440609183271	0.917819800000006	0.922429899999999	0.920032167526235	0.920903832474981	1
2003-02-13	0.0378763571428572	9.77745574723421	-2141031200	0.394755258737903	51.6299669569807	-0.0635633247049643	0.6986337202004	0.062676016940608	-15384614.1663594	101.38408479713	-4.12750568842342e-13	323533.642600021	0.00377195512820372	60.4155154765762	452.417766418083	101.253529153308	-0.00256100000000004	-0.00501529326116687	0.6	2.07549274175278	-0.00274699957839689	100.089599368951	-0.0206973662240553	-0.0237925355563774	-0.0348880439835275	70620690	-5.61463354778142	-0.381939300412593	0.00391313713055879	0.0193719187840655	8.12078467645402	0.605244741262097	0.544927207459706	0.530409776517542	0.573962069344036	-0.293186749069596	2578671076.44573	-0.26914405801482	1.19474090094949	0.0103692540475033	0.919228400000006	0.923838599999999	0.92369144501749	0.922741317479529	1
2003-02-14	0.0354274285714286	9.56690127258735	-2080206800	0.42596440386035	53.9915652841154	-0.0854975059658693	0.837264624661519	0.063226101378235	-826653.05310154	102.272717374736	2.53060442848591e-12	503447.719600023	0.00208912179487042	58.9515950184524	476.428516274662	100.068179832832	-0.016648	6.91228611408512e-05	0.6	2.38445835296229	-0.017567970908789	99.9256214470757	-0.0191545688222049	-0.0228649422095429	-0.0225810634348123	66673530	-5.05954729706562	-0.475461021010958	0.00284371019240964	0.0185799842972988	50.7990276172614	0.57403559613965	0.554630003686354	0.538483185573812	0.586923639911438	-0.127518674434046	2623054085.79153	-0.267755697861928	1.81606785035279	0.00890109515552978	0.925887600000006	0.925823599999999	0.92890563001166	0.925758168846888	1
2003-02-18	0.0356825000000001	10.828224571604	-2007482400	0.0259584519411303	62.9763478865673	0.00919998037829489	1.29123503839404	0.0759522573436831	21915746.9988894	106.023297619685	1.67994845471396e-11	1650150.51460002	0.00570528846153695	59.1396647390527	505.546343883362	104.589068644021	0.0608299999999999	0.00846769661034766	0.6	2.13903141264627	0.0642335826347182	99.4520273393995	-0.0149721404512662	-0.0212863818578876	0.00747201041613188	66975230	-3.01326225177036	0.0160875945669865	0.00349035516272104	0.0197854807355416	235.457800854336	0.97404154805887	0.694433851810526	0.59046674098605	0.902368073459478	0.332932935361963	2688254666.67402	-0.215525725866156	4.62490041805236	0.0400859683864293	0.937669400000006	0.929729499999999	0.94518808667444	0.93521177451109	0
2003-02-19	0.0343892142857143	11.9994533492624	-2067574600	0.351717037126764	54.8950489744953	0.0395756584013752	0.855447785800019	0.0796014719140507	25152237.128828	102.810891687645	-2.05536472287584e-12	588969.594500022	0.0079998012820498	50.6729123391403	531.308979486946	102.768233779737	0.0313760000000001	0.0134971611293522	0.6	19.1648216482163	0.0335541951172117	99.3612900889285	-0.0127368219550148	-0.019576469877313	0.0357326989279816	66811640	-3.01502732254149	-0.439521964608701	-0.000188971579123953	0.0204551134631191	144.107938708899	0.648282962873236	0.679050222164763	0.619994568045621	0.797161530403046	0.458101420007129	2671633191.36126	-0.147810490456901	1.16954387381052	-0.0278902436509921	0.944072600000006	0.931330299999999	0.947078724449627	0.938056906418164	0
2003-02-20	0.0316850714285715	13.0870229285165	-2123662800	0.413772636424202	53.4869874721247	0.0395305419658427	0.759033664101049	0.0760158336924474	18241367.4136138	101.942902674207	-1.63118694306466e-12	-951699.691599977	0.00824194871794715	53.377277761755	552.492393368487	102.356144754088	0.00704300000000002	0.0163967370709329	0.6	2.40856392023497	0.00747497021015221	99.3521987506971	-0.0109689894969367	-0.0178549738012377	0.0589360234865444	66926790	-3.50566032885424	-0.595736851249196	0.00234457910658566	0.0169219666962942	94.8207165991967	0.586227363575798	0.648109269301775	0.629366135131006	0.685595537643312	0.506949867587414	2642469337.57843	-0.204688568940848	0.146873510880397	-0.00540232053471087	0.948938800000006	0.933379299999999	0.946631482966418	0.939453287069407	1
2003-02-21	0.0312257857142858	13.7118023052915	-2084301800	0.237653792529902	56.9087667044138	0.0579782673431411	0.929986213452342	0.0766409373167069	20359774.7590642	103.234660372108	-2.03114885292607e-13	146164.79920002	0.00941582051281908	61.3472408240211	591.299780124769	106.007032817608	0.025612	0.0186426981316945	0.7	2.07242055708121	0.0270282730376394	99.2234170617731	-0.00731775953563385	-0.015747530948117	0.0831594351862641	66041640	-6.12088345464037	-0.773471658133296	0.00325736091648209	0.017288696031265	100.699977234458	0.762346207470098	0.686188248691216	0.648306839651076	0.761951066771495	0.664330036793648	2670311684.00151	-0.163070796640038	1.01006843281104	0.0154519833130851	0.954829600000006	0.937028999999999	0.951242321977612	0.943273416693151	0
2003-02-24	0.0346441428571429	13.8658661615434	-2129365000	0.349528201352424	52.2312602208897	0.0952711316430288	0.6987743579909	0.0647725001160555	26178418.8105597	101.118280758774	-5.75221672673046e-11	-85248.8216999793	0.0101998589743575	54.4810278522004	616.37777142537	102.717871586472	0.01857	0.0156104331972974	0.7	5.71592937909145	0.0198715625267263	99.2924620958559	-0.00616377803289281	-0.0138307803650721	0.0995726060030178	64476440	-7.42260111674043	-0.384557110577628	0.000527046609192719	0.0173077764152876	-29.5000790643734	0.650471798647576	0.674282765343336	0.656965481548496	0.708917332933015	0.638424021035888	2694125828.72305	0.117296645238931	-0.962982459668898	-0.017484209606476	0.955726200000006	0.940806899999999	0.948767214651741	0.943372250021669	1
2003-02-25	0.0354411428571429	13.9391445311858	-2082204600	0.175844296758443	56.3886024406697	0.117877708646746	0.985495739228345	0.0603967472359671	35088255.4730096	102.725445473467	2.0879563171644e-11	47662.2804000207	0.0123629487179474	63.2129534516602	652.793958429228	104.669018897658	0.037778	0.00779780385725137	0.7	2.82899194969235	0.0400729860444392	99.1940804358826	-0.0011582566457472	-0.0112962756212072	0.116878522694996	61941880	-8.11181437531956	-0.520356736798202	0.00217619863398603	0.0179227437447232	82.0464735404831	0.824155703241557	0.724240411309409	0.679390458135467	0.813940317657294	0.762514916989576	2729966887.60192	0.0924065195794879	0.524251373080668	0.0188170513418314	0.952524600000006	0.945096999999999	0.953093143101161	0.946712750017729	0
2003-02-26	0.0356962142857144	14.1261055361129	-2136478400	0.498411191412683	48.0284291927656	0.0441388906891174	0.382321376158172	0.0600431772630858	22845233.9231386	99.1961836485581	-1.32718443337303e-12	-480804.39679998	0.0132454551282039	55.807701486014	660.764842000704	100.76437531338	0.022411	0.00209368272980916	0.6	7.90562036055146	0.0244342042138314	99.4358841701189	0.00129507078854096	-0.00877800633925753	0.120094263869497	61077380	-7.54923083030718	-0.0206029676984265	0.00043719506614314	0.0202533140240052	20.9280743126369	0.501588808587317	0.650023210402045	0.66960137555766	0.610866880090816	0.569152881396318	2679711805.62323	0.118191492889882	-2.11520782024909	-0.0352338907805379	0.948042400000006	0.946057499999999	0.944878428734107	0.943392068196324	1
2003-02-27	0.0363084285714286	14.3194934946668	-2097893000	0.275096394179535	53.201391111486	0.0144206713879318	0.790428302529847	0.0602771346861844	19852276.5688157	101.683315728886	-2.09217735205543e-12	-458834.194699978	0.0138980961538449	61.5011233339779	666.534211700339	102.200835651604	0.032656	0.000134956463115426	0.6	3.39490581621506	0.0349233285175981	99.4161111031358	0.00602237303557618	-0.00581793046429079	0.123193279356615	58343600	-9.35499953674252	-0.149052883284089	0.00230939803912188	0.0212585806529311	42.3656319404692	0.724903605820465	0.674983342208185	0.671395364441168	0.682159297742219	0.606336277522446	2696248405.62323	0.165467281285237	0.303739894077454	0.0245242347541034	0.949195000000006	0.949066899999999	0.947085619156072	0.944866237615174	1
2003-02-28	0.0352370000000001	14.2052742202099	-2049118400	0.182044525391874	55.2022740830008	0.121333836938026	0.916599290033389	0.0636163724117187	22221337.8498459	102.46786234984	5.33787378061536e-12	678956.044200021	0.0146369615384603	69.8016849868435	670.589432726946	102.317705949109	0.042261	-0.00290017140631674	0.6	2.10592158851645	0.044967305969382	99.3250295007022	0.00969649818668583	-0.00271504473409547	0.12932330554305	55694100	-9.18765415434449	-0.323812115972867	0.00441646662200907	0.0203847968844872	82.9024978748287	0.817955474608126	0.722640719674832	0.688477149519056	0.790967859986384	0.70947285526739	2720636772.57428	0.106857366801044	1.043440778822	0.0100439774517839	0.949323200000006	0.952076399999999	0.951758746104048	0.94781873986696	0
2003-03-03	0.0357472142857143	14.6297996817586	-2100058800	0.405359322625021	49.7093463891967	0.0745161498118553	0.503541973073491	0.0613063717406029	12309980.5848627	99.9113843427211	-2.30426682947128e-12	-352873.563699978	0.0148421794871781	63.1689544817037	641.582052272076	95.9397721101342	0.0166480000000001	-0.00398430409041677	0.5	4.25265320095856	0.0179067523351128	99.4775313909888	0.0131373060184792	0.000455425416419463	0.127387267447743	53975810	-8.62911856952345	0.19365359260016	0.00169375826932433	0.0215020243701598	27.9548763483336	0.594640677374979	0.679974038908214	0.685642779315442	0.668636558093758	0.587427036015908	2686398641.3861	0.190008434212181	-0.991192100860833	-0.0242761475424365	0.948170600000006	0.951948399999999	0.947190497402699	0.946043332618422	0
2003-03-04	0.0354410714285715	15.2981967746002	-2131662400	0.461190443897619	48.4123271889745	0.0595679136034948	0.405007087260741	0.0613536933164869	4572910.87982798	99.3314427538569	-1.31811360098218e-11	-678179.353599978	0.0130772371794858	58.3298877706491	624.415534052042	98.0471362766338	0.00128099999999998	-0.00543617723736911	0.4	5.29790591546893	0.00137497935311377	99.6522298707235	0.0142447440170578	0.00321328913654713	0.117991042235444	52246180	-11.1486396137324	-0.265045851612907	0.00125493187218423	0.0216017104132761	-51.5946170713341	0.538809556102381	0.63291921130627	0.668068256645718	0.562621120627373	0.436358001954051	2675294092.05963	0.0645546793828295	-1.39954141830361	-0.00616251893449572	0.942279800000006	0.947402199999999	0.942223998268466	0.943542908505982	1
2003-03-05	0.0351860000000001	15.9188512179531	-2099991600	0.423969696382554	49.3609366263709	-0.00282292232381439	0.463705473352251	0.0607426624687018	-927319.622519016	99.7339846088432	1.29835684605382e-12	-30226.1665999799	0.0116037179487165	56.853721093272	610.410657222429	98.984495689605	-0.00320100000000001	-0.00223867645471879	0.5	5.07542362599586	-0.0034135531131845	99.7529919233718	0.013346071400361	0.00523984558930991	0.105767300884363	49862050	-13.166162715813	-0.59066564909444	0.00135012792425454	0.0216119217140567	-46.752700660244	0.576030303617446	0.613956242076662	0.650030918456033	0.54180688931792	0.34548379669983	2666245744.49963	-0.0215762941146941	-0.544202317047624	0.00411256268923151	0.943816600000006	0.945929499999999	0.940193665512311	0.942195652413985	0
2003-03-06	0.0342360000000001	16.8170470553563	-2124956400	0.461190443897619	48.402433822809	0.0675500927069643	0.40327960436268	0.0612967031456607	-289424.527543068	99.2874092062032	-6.28611925591235e-12	12882.2260000212	0.00786444871794734	51.4257006440883	596.525278341181	97.0667302470473	-0.045462	-0.0049044931842776	0.5	10.2735573087492	-0.0476120841888453	99.8672784952777	0.0104970659080256	0.00629128965305304	0.090739463656786	48340110	-15.9560634419883	-0.736147151499427	0.000312462299355054	0.0214911980586157	-110.729531051966	0.538809556102381	0.588907346751902	0.629656394554656	0.507409251146394	0.237745198167216	2681225323.50005	-0.0406104398449889	-1.01971662112624	-0.00411256268923151	0.939974800000006	0.944584899999999	0.937559443674874	0.940394806520533	0
2003-03-07	0.0343890000000001	17.1034152331209	-2175202400	0.47980081765515	47.9015759722692	0.0661144370310303	0.361405587148972	0.0600893358700844	1182046.98105478	99.0490547637888	5.32514856904099e-13	-96218.6637999778	0.00714202564102417	43.0627913492839	594.969986539646	98.5752534654493	-0.02049	-0.00829671166353438	0.4	103.833976833974	-0.0217844817603544	99.9721608743924	0.0107239839151005	0.00717782850546254	0.0739048226949146	48613040	-13.562545817569	-0.191060082475222	-0.000473347925156988	0.0213521176896293	-105.865573461663	0.52019918234485	0.566004625282885	0.608439138130732	0.481135599587189	0.13423849552614	2686249747.63641	-0.0377511625505834	-0.852964809340519	-0.0020626412225012	0.933827800000006	0.941575499999999	0.935162962449916	0.938572114425891	0
2003-03-10	0.0333175714285715	17.3693285410451	-2208845800	0.555752085718959	45.2144161701197	0.0963674288872017	0.152549905787749	0.057014888725369	-3150972.03056288	97.8849510205567	-4.73283615805823e-13	-220599.599499979	0.00488453846153714	33.8218816330289	574.750303482936	95.672449557835	-0.0256120000000001	-0.00963652468926674	0.4	-1.45194003527337	-0.0274549873353283	100.145500529896	0.00994836976778501	0.00773193675792704	0.0528028593673069	46923940	-14.5052045265398	-0.77086005393733	-0.00418134813056085	0.017831823840847	-113.765500233686	0.444247914281041	0.525419054948937	0.580765777070134	0.414725610706542	-0.0357110545709305	2665336558.01934	-0.297346346841101	-1.22581434693381	-0.0110728261096848	0.930242000000006	0.939206299999999	0.930150308299944	0.935218093621183	0
2003-03-11	0.0324170714285715	18.1362794901178	-2249143400	0.647401030590544	42.9444206067485	0.0729535390238583	-0.00488211589611763	0.0578997573006076	-8407787.58905315	96.9709695633603	-7.75307768949023e-12	-352952.159699979	0.00109607051281924	35.063980126957	577.649008269004	98.1379698831061	-0.049303	-0.00878159772616556	0.3	-2.32846223778578	-0.0526968905126577	100.356022843629	0.00706518747795537	0.0075985869019327	0.0267937019316822	46840220	-13.9203927527562	-0.399588135595295	-0.00291258049155341	0.0166365188333283	-155.94056619988	0.352598969409456	0.46781235976911	0.543114637969792	0.317207803367744	-0.245457910272662	2649001918.4643	-0.291249452652594	-1.71518584431003	-0.00978991986424428	0.926016000000006	0.934147899999999	0.923820538866629	0.93084407659915	0
2003-03-12	0.0328252142857143	19.0234170012274	-2304783600	0.653954686733191	42.779026571152	0.0831645178366634	0.0242768142585683	0.0616689239336313	-10171014.6745553	96.9456921735775	-2.38928760141048e-12	-198446.527299978	-0.000595064102565379	35.2247679062748	578.486773896169	95.6931161324225	-0.033297	-0.0124461745517915	0.3	-2.74231669112106	-0.0359164265416195	100.513192401835	0.0046500192104203	0.00700887336363022	-0.000874345882329042	47562480	-10.5194619809919	-0.00801949013835568	-0.00257799076448414	0.0166300125391097	-147.328892706728	0.346045313266809	0.427223344268343	0.504484206735976	0.272701619333076	-0.413193573582316	2647314135.044	-0.308553740494378	-1.39840450492737	-0.000703745635437847	0.920893400000006	0.932354999999999	0.919387025911086	0.927148789944759	1
2003-03-13	0.0339477142857144	18.1470761864709	-2220922200	0.326619499427449	52.5987005475719	0.160815905527069	0.572461458483271	0.0603912093237725	6319711.48451757	100.241767527215	7.98057866908975e-12	1324620.60710002	-0.00249135256410393	39.6397134098476	579.36340958083	98.0679530332274	-0.0192089999999999	-0.00922722804802641	0.3	-10.9033804238144	-0.0201752278834603	100.319661720214	0.0056222485019265	0.00673154839128948	-0.0153468054859718	48896960	-3.10826224009422	0.756389957728707	-0.00117868059735859	0.0189386500377718	-21.9503907577323	0.673380500572551	0.509275729703079	0.506081381058344	0.515664426992549	-0.265509012135778	2709878466.61733	-0.210938158725006	1.95083723589107	0.0345582499999906	0.922942400000006	0.931458599999999	0.927103350607391	0.929946464500257	1
2003-03-14	0.0295600000000001	17.1345374779507	-2182647600	0.372781536012733	53.6271445242727	0.126437191622048	0.621689868894882	0.0597812925845622	10342171.8696012	100.568190542895	1.64634883839413e-11	1415978.79780002	-0.00181000000000142	46.1676131977912	595.683170166997	100.887368957437	0.0179290000000001	-0.00414827499826466	0.3	7.1876442958363	0.0191266144270997	100.135800219859	0.00691369092485516	0.00676797689800262	-0.0193606983542427	48204520	-4.7977774795113	-0.163279458101787	0.000350496875695351	0.0183903844061317	73.9357965897446	0.627218463987267	0.548589974464475	0.520250912193721	0.605268099005984	-0.114077571236781	2700567959.09151	-0.168373179929724	2.10710490209643	0.0040679515300221	0.926144000000006	0.929985899999999	0.933528233738261	0.932934016409301	1
2003-03-17	0.0288457857142858	16.3235856211262	-2082669400	0.177437325905292	57.4390595986604	0.143698523904361	0.855764521179563	0.0610708126527774	26316746.0813966	102.015168560853	7.56443054585865e-13	809714.982300018	-0.00243796794871931	50.420739152763	623.376540162588	103.090665897236	0.00960499999999997	0.00219299184451824	0.4	9.30373931623929	0.0100439774517839	99.8621852644333	0.0106177916229433	0.00753793984299075	-0.010984148983495	50162210	3.43571199901786	0.751397604825229	0.000105227413216383	0.0181438404587396	112.304191752167	0.822562674094708	0.639914207674553	0.560138677353998	0.799465268315662	0.131101580500026	2767218796.44714	-0.219712186624379	3.12608137772542	0.0154415977787876	0.934340000000006	0.932290999999999	0.942720489158841	0.938056013425792	0
2003-03-18	0.0274682857142858	15.6489728874373	-2140164600	0.185939779811646	57.2185918996474	0.0993235642755277	0.86429456665878	0.0588212221317401	34475961.0395527	102.040758869605	1.58175174623276e-12	717762.264100018	-0.00458469230769365	58.6536904016654	656.225268137878	102.599096495904	-0.000641000000000003	0.00962962743299157	0.4	2.07266452457456	-0.000667163160704733	99.6699242836267	0.013002576882717	0.008630867250936	0.00416110956811266	49400750	3.34938874186289	0.0576598601648968	0.00253047476182153	0.0151707399507363	109.559758000074	0.814060220188354	0.697962878512487	0.606080077740161	0.881728480057138	0.315449133830392	2786387838.03171	-0.226593071083779	2.31917962616135	-0.000667163160704733	0.944200600000006	0.935108299999999	0.94863499277256	0.942130192802921	0
2003-03-19	0.0268050000000001	15.2717922097267	-2175493600	0.228398991908741	56.0613777293949	0.115056084985306	0.797424011946319	0.0598253769284085	33780082.8099904	101.666101302137	1.05027886438901e-12	-74971.2760999789	-0.00446159615384745	53.2062890556454	672.003847490179	102.678562809252	0.0192089999999999	0.0171232905444283	0.3	4.06217090655333	0.0202706541889764	99.5635668333104	0.0149576863532772	0.00989623107140424	0.0211801288242608	48162590	0.0176964129213149	-0.0881698101652155	0.000519032518183415	0.0137911578151521	97.4136824866181	0.771601008091259	0.722508921705411	0.644889692395244	0.877747380325743	0.428617324214353	2782461172.32431	-0.169287427609504	1.15021029307175	-0.00333833019275537	0.953549200000006	0.937221299999999	0.951510995181707	0.944881612293299	0
2003-03-20	0.0271621428571429	14.2537002532349	-2216288200	0.26236901445815	55.1012117491051	0.173057144905006	0.751347193950486	0.059874634133334	36057530.5195475	101.345863238147	-8.33396470366173e-12	-108781.549799977	-0.00397316666666814	46.5075662150783	696.177042692233	102.615303588895	0.0224110000000001	0.0172806528655834	0.3	15.1312204614954	0.0237542521896585	99.5160615661892	0.0163683258645636	0.0111906500300361	0.0371688644215995	47397910	-1.87588367497678	-0.178659965843426	-0.0003931048618652	0.0135289241488028	58.5055110537895	0.73763098554185	0.72754960965089	0.672442998147126	0.837762832658419	0.490441565009569	2806520277.15972	-0.0697090300100184	0.100726122806084	-0.00267892093381364	0.955982400000006	0.939462399999999	0.952574663454471	0.946667137330881	1
2003-03-21	0.0257336428571429	13.7590284633292	-2141801200	0.152987289012794	56.8901977312863	0.145443885540438	0.839806786552044	0.0613277970124514	35224829.4826212	101.957525164045	4.08373104031576e-12	162359.56170002	-0.00344781410256534	55.7467674306464	726.800885135169	104.384078250238	0.024331	0.0170294188691852	0.4	1.85711200246838	0.025658940626996	99.437458527865	0.0173749161826741	0.0124275032605637	0.0536084362002365	49154210	1.74882228171537	0.379968291619083	0.00175112678589753	0.0117664688358747	101.277877744718	0.847012710987206	0.767370643429662	0.704085546574638	0.893940837139711	0.581647001578056	2813295269.86293	-0.0885110857652619	0.390357704791346	0.00601725112656901	0.958799600000006	0.942471799999999	0.955204442302981	0.949175657816175	0
2003-03-24	0.0268293571428572	13.7317699956994	-2182076400	0.709717487613344	43.7480213841636	0.0843050571055013	0.137770382334238	0.0610537737403496	22776943.9500675	97.7983428727794	-1.96524239109924e-11	-597733.599399982	-0.00404299358974469	55.0851981422472	733.354842638922	100.983799789499	-0.012166	0.00855435430710255	0.4	-27.7880886426591	-0.013135467332186	99.7546573569508	0.0145607687840067	0.0128541563652523	0.0533948185869049	48914810	-0.54846790795466	0.242464856755777	-0.000810010524979683	0.0165478460619672	-40.6515422683712	0.290282512386656	0.608341266415327	0.672170786521535	0.480682226202912	0.306058329447034	2776601145.73014	-0.037306585462204	-3.3841238629271	-0.0429069706484134	0.950603600000006	0.942471799999999	0.943511294868654	0.943893720031416	1
2003-03-25	0.0277477142857144	13.6594756412757	-2140152000	0.550643830133734	47.4812324457115	0.0385588026528802	0.352707557337519	0.0603079073233538	13390680.3604202	99.1820431138285	3.56592700193756e-13	-570720.329199978	-0.00364074358974464	55.714699035872	731.889031619781	102.320761762509	0.00128099999999998	0.00033889299893549	0.5	12.3002899601304	0.00137592454875181	99.8900622718314	0.00989440195446778	0.0122622054830954	0.0474043938978097	48653010	-2.15266433816208	0.280472875606339	-0.00020961566700743	0.016889477833719	-19.336652397793	0.449356169866266	0.555346234232307	0.633229269091792	0.399580164513336	0.183749366288977	2767486923.82309	0.010487202303392	-1.66699239656709	0.0124487506584366	0.944841000000006	0.944520799999999	0.93955786324577	0.941667770934795	0
2003-03-26	0.0279834285714286	13.7769106374466	-2184737800	0.674372386380888	44.9807282614459	0.0839924060844604	0.218072704873317	0.0622380122255778	6914921.23954821	98.2577853996961	-4.62673470028579e-12	41754.4687000219	-0.00130936538461646	54.2677804048624	725.343631663172	97.8939796464008	0.00256100000000004	-0.00832880561101304	0.5	171.830379746824	0.00277945122827906	100.075333385098	0.00696606334258554	0.0112029770549934	0.0346530231975617	48168610	-3.00274158343366	0.579948589975544	-0.000603800265521267	0.0170509907404891	-64.1818177325473	0.325627613619112	0.478773360694575	0.58174396629272	0.272832149498286	0.00958388473391025	2760627754.65611	-0.0243799939684261	-1.96169892424001	-0.0096692994301575	0.937925600000006	0.945737399999999	0.933933908830513	0.938216539855741	1
2003-03-27	0.0278814285714286	13.3066781243492	-2154139400	0.603668382626937	46.7078678692119	0.0640146433267436	0.321697537055214	0.0625785090697311	2888246.28789949	98.9281308175892	4.54447255412047e-12	-121478.046899979	0.000964544871793871	59.956293691982	721.753067704161	98.0378876093908	0.016648	-0.0125652648070208	0.5	9.81260922166962	0.0181062821224276	100.16453302418	0.00505113539315594	0.00997260872262593	0.0204885317764747	47769260	-5.96089906942979	-0.495983221771137	-6.00300160849633e-05	0.0171222016486777	-40.5971005305398	0.396331617373063	0.451292779587404	0.538260237390948	0.277357863980317	-0.0837059356245229	2757407048.44088	-0.124064836419108	-0.900464037246986	0.00553691102990429	0.932547000000006	0.944264699999999	0.931892272553675	0.93632425988197	1
2003-03-28	0.0272692142857144	12.8700336479016	-2117813600	0.532978180162028	48.4502331682464	0.0621073857720597	0.430063183193912	0.0602914970871495	5423356.70076036	99.6239052907037	-8.17495856939131e-13	171408.17540002	0.00332466666666564	64.7138236938277	718.773832992384	97.0685825169987	0.022411	-0.0171293505655125	0.5	3.42532666842059	0.0243153782494284	100.180358868558	0.00254466343983617	0.00848701966606798	0.00828329412003725	47146820	-7.3727696857544	0.0767113324616169	0.00112084718365085	0.0168771288604864	-39.723016264171	0.467021819837972	0.45653579300426	0.511018755928719	0.347569867155343	-0.112322894132988	2779200087.32759	-0.15634194551368	0.0343122695313467	0.00550535049156296	0.927040400000006	0.942919999999999	0.932238515035784	0.935707303539794	0
2003-03-31	0.0278814285714286	13.4604222417753	-2181978400	0.902543182252299	40.7395779123176	0.057340652347903	-0.00016624334242125	0.0635177876879657	-3430330.22475433	96.8526405854646	-6.44718755454702e-12	-790294.345399977	0.00234775641025531	62.7049359251918	691.420393893586	94.2667294141165	-0.037138	-0.0143430058597793	0.4	18.437101722917	-0.0401994888481717	100.44625908228	-0.000606387593997337	0.00666833821405492	-0.0126667391142421	47808040	-3.67907245351194	0.465162859898101	-0.000291310687480236	0.0185956103833562	-116.195514842785	0.0974568177477012	0.336842801252074	0.452960104369837	0.104608195016547	-0.368664922848627	2741225525.40759	-0.0731252618752919	-1.9530736743314	-0.0299566170976096	0.924095000000006	0.937349299999999	0.923291676690522	0.930196521078013	1
2003-04-01	0.0274222857142858	14.0086402218009	-2143393000	0.885065626108549	41.2083816956997	0.0584407453736833	0.076375501040361	0.0684172537977734	-8678612.52823162	97.1227196533881	-3.08046542215451e-12	-858610.770499977	0.000467891025639933	64.1411268805699	673.669515156002	94.7157677670609	-0.039699	-0.014003037317126	0.5	12.891540834551	-0.0428535929386099	100.625528133943	-0.0047955885483052	0.00437555286158289	-0.0370435024819704	48157130	-5.03177095951175	-0.366031995006434	-0.000140000297648998	0.0186006161626016	-132.961763609787	0.114934373891451	0.2628733254652	0.389597844734958	0.00942428692568265	-0.555398701004572	2731580863.50478	-0.0780066083362858	-1.57549436834953	0.00141384743958391	0.919100600000006	0.931970799999999	0.917754117793682	0.925920608154738	1
2003-04-02	0.0266795714285715	13.0510326741586	-2100550200	0.500682184080552	50.4857576166855	0.092183258800748	0.524345968384715	0.0684416969290182	-4194764.44163322	100.147459681588	1.22257415481715e-11	628219.050900021	-0.000685512820513878	62.0098162107744	654.816493327348	97.9208171764593	-0.026253	-0.00889375951266547	0.6	32.6234887737481	-0.0276954361983441	100.481594607196	-0.00393415865997393	0.00271361055727153	-0.0508966667345789	48715730	-5.34613615733485	-0.67162783317325	-0.000432113564885468	0.0180268268028433	-37.2043180168184	0.499317815919448	0.341688155616616	0.373627948362177	0.277808570125493	-0.453762182128681	2756061239.42478	-0.0356445244255483	1.42408579557722	0.0305997545190534	0.921533800000006	0.929729699999999	0.923453411862454	0.927544497581149	0
2003-04-03	0.0265775000000001	12.1706354029055	-2136978200	0.622984146041968	47.8959813201325	0.0621895721375825	0.384406605061174	0.0684679829459024	-5054306.25696707	99.2212068440695	2.91671241901831e-12	440234.806200022	-0.00346834615384717	56.5918302125137	631.830524903359	96.400073297906	-0.0345759999999999	-0.00618650868435789	0.6	-6.83641563393706	-0.0366632240201583	100.451337306135	-0.00560168491689894	0.00105055146243744	-0.0607893902094259	49288890	-6.66741630480633	-0.0494487810977411	-0.00140817931003979	0.0181335727505725	-32.9486173274066	0.377015853958032	0.353464055063755	0.366906650596036	0.326578863999191	-0.44591604291323	2742530423.10478	-0.048123264510589	0.393435903885949	-0.00963495098251896	0.921149600000006	0.926848299999999	0.924264941241636	0.927243316202758	0
2003-04-04	0.0261692857142858	11.3531236510276	-2173483200	0.666671214560537	46.969130042206	0.0257112076089767	0.335235421396476	0.0685309434856026	-11583395.476243	98.9187969632209	3.97753732365432e-13	-221714.800999979	-0.00524153205128286	46.1407481957407	630.76650204867	100.278331748404	-0.034577	-0.00431933131149403	0.5	-2.00524297125163	-0.036789189227379	100.451309421518	-0.00812609376944529	-0.000784777583939109	-0.0686798004569056	48601840	-7.66850472129611	-1.00750292471459	-0.00276673194823738	0.0174645572022165	-30.1897898888721	0.333328785439463	0.346752298522324	0.360188533238132	0.319879829090707	-0.462236120289883	2711241987.60478	-0.064843416525307	0.138954358503583	-0.00346429539997603	0.919100600000006	0.923070499999999	0.923738627494424	0.926414713256802	1
2003-04-07	0.0275467857142858	11.6230047205673	-2124267600	0.596774633667149	48.680260539936	0.0114130819846758	0.406067446024404	0.0681455993085985	-21952375.9794536	99.4270675295384	7.93393798917413e-12	67621.2544000202	-0.00620200000000082	45.2930735018018	621.168207444908	99.5876138167619	-0.0268930000000001	-0.0002772897026589	0.6	-2.74155815493268	-0.0285733572636611	100.39518882359	-0.00828908655641103	-0.00228563937843349	-0.0726193409862907	49380450	-6.09424546542019	-0.155490819646012	-0.00232250275473489	0.0176006419047585	26.3760829708107	0.403225366332851	0.365576654459166	0.361984573645144	0.372760816087212	-0.425760185910873	2676608220.50514	-0.00862944544879474	0.788331349016563	0.00553691102990429	0.923582800000006	0.923838899999999	0.925095418329616	0.926668219937384	0
2003-04-08	0.0271897142857143	11.6622018992865	-2156501200	0.629856149637288	47.8487562643269	0.0157015838915482	0.350425892635167	0.0657941665346462	-26822117.4966083	99.0777361458974	-7.84357239030079e-12	84774.5178000217	-0.00864417307692378	45.6079803339228	609.813234793433	100.277559212993	-0.0352169999999999	0.00441919110222681	0.5	-2.82113008720931	-0.0373557721332023	100.370933912633	-0.00819331066745643	-0.00346717363623808	-0.0746462210400645	48977250	-7.86821668651166	-0.0916947696472121	-0.00228168704295546	0.0175987813646279	-20.7729670664368	0.370143850362712	0.367099053093682	0.36368940012799	0.373918359025065	-0.414361094511506	2664382326.45735	-0.0842809987837613	0.150112904892979	-0.00276516374297227	0.927296400000006	0.923198499999999	0.925145945553078	0.926409816312405	0
2003-04-09	0.0276489285714286	10.8625688406443	-2193182600	0.85815174910522	42.740015209221	-0.0124634634175767	0.060767992023553	0.063782548267915	-33529576.0570283	97.3050352358992	-6.54708617991665e-12	-346627.215199978	-0.00869344230769287	46.0186498253766	591.36746898761	97.9295307547135	-0.0115259999999999	0.000277643474984436	0.5	-1.72035564911503	-0.0126056776484936	100.503823732355	-0.00968105600072899	-0.00470995010913626	-0.0815952688635879	48029310	-8.41052474624822	-0.106279905110696	-0.00337580828469996	0.0180943135834792	-95.7411028174834	0.14184825089478	0.292015452360714	0.339798084205565	0.196450188671014	-0.544149901145641	2635341904.08087	0.0334138739534591	-1.68594471388253	-0.0181568761637047	0.922045800000006	0.921789799999999	0.919630297035385	0.923171486073786	1
2003-04-10	0.0269345714285715	10.120052429048	-2166407600	0.649581003348769	46.9621345553833	-0.0590994351574184	0.274221958534286	0.0660199618726944	-29352647.1691971	98.6577876712855	-3.75248920634927e-12	-151031.64859998	-0.00903825000000047	36.3381571692363	572.098103411445	98.6273368555659	-0.011526	-0.00013921266873645	0.5	-2.23718645967236	-0.0124487506584366	100.484702961187	-0.00987220553913448	-0.00574240119513591	-0.0863153328655941	45174990	-10.7119205191081	-1.02315599718109	-0.00290080307352892	0.0184442806841692	-84.4180804270378	0.35041899665123	0.311483300457553	0.330359822956227	0.273730255460204	-0.540524879754267	2656482138.77249	-0.0649018287159253	-0.173659769338542	0.0126056776484936	0.920893200000006	0.921021399999999	0.91979519802359	0.922617579514916	0
2003-04-11	0.0316552857142858	12.3680799863427	-2514584800	0.85686826031779	30.9749851669561	-0.220659250821489	-0.526017980154759	0.0888963228482537	-90102636.5286989	91.1193437234729	-1.08160901948778e-11	-12887717.2326	-0.0121453589743595	24.0012334703262	540.21975105382	93.3522053284854	-0.077477	-0.00756728147560469	0.4	-1.0455665783474	-0.0877050475546905	101.183003152981	-0.0156636512668933	-0.00772665120948738	-0.118284857977879	60670120	30.4783202362102	2.15697565067036	-0.00571650882036052	0.0262355496352403	-303.281476720137	0.14313173968221	0.255366113532439	0.305361919814965	0.155374500967387	-1.18257334089692	2432819494.56251	0.594003388286567	-6.94391867404945	-0.0849255963264114	0.905397800000006	0.912249199999999	0.894933132015727	0.908543292330385	1
2003-04-14	0.0319137142857143	14.4555341466879	-2388845200	0.676287450925094	38.3194378613626	-0.30639124366941	-0.101470611218818	0.101119399587768	-115997046.958473	94.2074724508953	-1.00781456677132e-12	-11512273.584	-0.0146614487179494	30.2952630385217	508.546918859433	95.9039527771129	-0.058268	-0.0166930314065179	0.5	-1.54826328919593	-0.0648604064178934	101.453354139535	-0.0183498319386707	-0.00985128735532404	-0.15491381935574	61958190	30.8548190727634	1.09834510544563	-0.00455496689185423	0.0274377981885719	-198.802426731491	0.323712549074906	0.278148258713261	0.29629069944773	0.241863377244323	-1.46512081937573	2387549858.65502	0.338037463120779	-3.32220890090492	0.0283815521667014	0.893744200000006	0.908663499999999	0.886469088010485	0.901451966452134	0
2003-04-15	0.0321178571428572	16.6893511263172	-2464837200	0.766585277157255	36.242780609572	-0.341294504768008	-0.106653803999948	0.113788400193667	-122638956.247318	93.4109304562098	-3.12896336456469e-12	1067450.64160002	-0.0185443653846161	29.4575657101087	471.859611040398	91.7122710332759	-0.075557	-0.0267714313241368	0.4	-1.45863465432456	-0.0844570136605911	101.753879445245	-0.0210757679433883	-0.0120961834729369	-0.196327434179699	62883030	26.5382514156466	0.533212648907558	-0.00486709100800559	0.0275245988655478	-173.408571595469	0.233414722842745	0.263237080089756	0.285272826328405	0.219165587612457	-1.78028313499615	2357155186.38847	0.327134002541329	-3.41434014977211	-0.0140912567511347	0.880169600000006	0.903732999999999	0.876770725340323	0.893437790733564	0
2003-04-16	0.0340056428571429	19.2812918265471	-2718881200	0.831628030319772	34.6466786589598	-0.313314199875468	-0.0858404351848113	0.126378926737736	-124198599.376858	92.9188008578689	-2.10043892396593e-12	-1682216.61999997	-0.020908583333334	21.5806964404411	437.97482033811	91.5629104168107	-0.057628	-0.0311300480481688	0.3	-1.07878467710847	-0.0657652534427343	102.04843195212	-0.0242814781015892	-0.0145332423986674	-0.241194193358163	73818780	36.0577888702728	2.1165597603531	-0.00606379915145753	0.0274006738449684	-149.572097504417	0.168371969680228	0.231615376619913	0.267387009758908	0.160072110341924	-2.09629938459764	2319891732.49465	0.423188046376049	-3.08648867187523	-0.0112648568797528	0.868003800000006	0.8950248	0.867103816893549	0.885134556054734	0
2003-04-17	0.0354342857142858	21.9195909115065	-2872945600	0.808437030680111	33.3800593314627	-0.256751298873595	-0.0296576660272598	0.14462680171522	-93791388.405468	92.6586102002606	-5.22320307611622e-12	-1811834.71279997	-0.0237490000000007	16.8973150938114	414.46897427127	91.0478754419163	-0.066593	-0.0404328189334138	0.3	-0.850202184802945	-0.0762842059214224	102.315414785692	-0.030294441324544	-0.0176854821838427	-0.287620510973086	79482270	34.9106598186647	1.44484246420447	-0.00710553571382164	0.0272028988492529	-144.343959112121	0.191562969319889	0.218264574186572	0.251012864568129	0.152767993423457	-2.39335718022843	2398376755.96128	0.439211017343011	-2.6947137171931	-0.00910510503910422	0.851996000000006	0.886444599999999	0.858097877929032	0.876943909499328	1
2003-04-21	0.0340057142857143	24.3694400618259	-2834865600	0.799848476721734	33.8144635686126	-0.254291130433235	0.0447727499919586	0.151580336594978	-69018138.8621292	93.413439183845	2.75577731092437e-12	-567525.184799982	-0.0276483012820518	20.1201038971309	413.296080490554	90.6832117386229	-0.093485	-0.0318188695949152	0.4	-1.32731209861005	-0.105360277949402	102.464324940269	-0.0360418689149636	-0.0213567595300669	-0.330703561787893	77661920	26.0523212990944	-0.521765563804326	-0.00488859223671978	0.0264917692597878	-106.964997056401	0.200151523278267	0.21222689055047	0.238084206562243	0.160512258526924	-2.59153009072839	2418320521.29462	0.338106907797999	-1.04178367007784	0.00152368249107368	0.851227600000006	0.878312699999999	0.852520918619355	0.87047538049945	1
[truncated: 3,724 more rows]
