# Supplementary material for: An Empirical Study of Machine Learning Algorithms for Stock Daily Trading Strategy
Source: Hindawi journal article supplement (doi:10.1155/2019/7816154), 2019-01-01
Supplement: f1 [file 7816154.f1.zip › Optional Supplementary Materials(Data, code, and results)/SPICS/AAPL_TradeSignal_Cart.csv]

	pre_signal
2010-01-22	2
2010-01-25	2
2010-01-26	2
2010-01-27	1
2010-01-28	1
2010-01-29	2
2010-02-01	2
2010-02-02	2
2010-02-03	1
2010-02-04	2
2010-02-05	1
2010-02-08	2
2010-02-09	1
2010-02-10	2
2010-02-11	2
2010-02-12	2
2010-02-16	1
2010-02-17	2
2010-02-18	1
2010-02-19	1
2010-02-22	1
2010-02-23	2
2010-02-24	2
2010-02-25	2
2010-02-26	2
2010-03-01	1
2010-03-02	2
2010-03-03	2
2010-03-04	2
2010-03-05	2
2010-03-08	2
2010-03-09	2
2010-03-10	2
2010-03-11	2
2010-03-12	1
2010-03-15	2
2010-03-16	1
2010-03-17	2
2010-03-18	1
2010-03-19	2
2010-03-22	2
2010-03-23	2
2010-03-24	1
2010-03-25	2
2010-03-26	2
2010-03-29	2
2010-03-30	1
2010-03-31	2
2010-04-01	2
2010-04-05	2
2010-04-06	2
2010-04-07	1
2010-04-08	2
2010-04-09	2
2010-04-12	2
2010-04-13	2
2010-04-14	2
2010-04-15	1
2010-04-16	1
2010-04-19	1
2010-04-20	2
2010-04-21	2
2010-04-22	2
2010-04-23	1
2010-04-26	1
2010-04-27	1
2010-04-28	2
2010-04-29	1
2010-04-30	2
2010-05-03	1
2010-05-04	1
2010-05-05	1
2010-05-06	1
2010-05-07	2
2010-05-10	2
2010-05-11	2
2010-05-12	1
2010-05-13	1
2010-05-14	2
2010-05-17	1
2010-05-18	1
2010-05-19	1
2010-05-20	2
2010-05-21	2
2010-05-24	1
2010-05-25	1
2010-05-26	2
2010-05-27	2
2010-05-28	2
2010-06-01	2
2010-06-02	1
2010-06-03	1
2010-06-04	1
2010-06-07	1
2010-06-08	1
2010-06-09	2
2010-06-10	2
2010-06-11	2
2010-06-14	2
2010-06-15	2
2010-06-16	2
2010-06-17	2
2010-06-18	1
2010-06-21	2
2010-06-22	1
2010-06-23	1
2010-06-24	1
2010-06-25	2
2010-06-28	1
2010-06-29	1
2010-06-30	1
2010-07-01	1
2010-07-02	2
2010-07-06	2
2010-07-07	1
2010-07-08	2
2010-07-09	1
2010-07-12	1
2010-07-13	2
2010-07-14	1
2010-07-15	1
2010-07-16	1
2010-07-19	2
2010-07-20	2
2010-07-21	2
2010-07-22	2
2010-07-23	1
2010-07-26	2
2010-07-27	1
2010-07-28	1
2010-07-29	1
2010-07-30	2
2010-08-02	2
2010-08-03	2
2010-08-04	1
2010-08-05	1
2010-08-06	2
2010-08-09	1
2010-08-10	1
2010-08-11	2
2010-08-12	1
2010-08-13	1
2010-08-16	2
2010-08-17	2
2010-08-18	1
2010-08-19	1
2010-08-20	1
2010-08-23	1
2010-08-24	2
2010-08-25	1
2010-08-26	2
2010-08-27	2
2010-08-30	2
2010-08-31	2
2010-09-01	2
2010-09-02	2
2010-09-03	1
2010-09-07	2
2010-09-08	2
2010-09-09	2
2010-09-10	2
2010-09-13	2
2010-09-14	2
2010-09-15	2
2010-09-16	1
2010-09-17	2
2010-09-20	2
2010-09-21	2
2010-09-22	2
2010-09-23	2
2010-09-24	1
2010-09-27	1
2010-09-28	2
2010-09-29	1
2010-09-30	1
2010-10-01	1
2010-10-04	2
2010-10-05	2
2010-10-06	2
2010-10-07	2
2010-10-08	2
2010-10-11	2
2010-10-12	2
2010-10-13	2
2010-10-14	2
2010-10-15	2
2010-10-18	1
2010-10-19	2
2010-10-20	1
2010-10-21	1
2010-10-22	2
2010-10-25	1
2010-10-26	1
2010-10-27	1
2010-10-28	1
2010-10-29	2
2010-11-01	2
2010-11-02	2
2010-11-03	2
2010-11-04	1
2010-11-05	2
2010-11-08	1
2010-11-09	2
2010-11-10	1
2010-11-11	1
2010-11-12	1
2010-11-15	1
2010-11-16	1
2010-11-17	2
2010-11-18	1
2010-11-19	2
2010-11-22	1
2010-11-23	2
2010-11-24	2
2010-11-26	2
2010-11-29	1
2010-11-30	2
2010-12-01	2
2010-12-02	1
2010-12-03	2
2010-12-06	1
2010-12-07	2
2010-12-08	1
2010-12-09	2
2010-12-10	2
2010-12-13	1
2010-12-14	2
2010-12-15	2
2010-12-16	1
2010-12-17	2
2010-12-20	2
2010-12-21	2
2010-12-22	1
2010-12-23	2
2010-12-27	2
2010-12-28	1
2010-12-29	1
2010-12-30	1
2010-12-31	2
2011-01-03	2
2011-01-04	2
2011-01-05	1
2011-01-06	2
2011-01-07	2
2011-01-10	1
2011-01-11	2
2011-01-12	2
2011-01-13	2
2011-01-14	1
2011-01-18	1
2011-01-19	0
2011-01-20	0
2011-01-21	1
2011-01-24	1
2011-01-25	1
2011-01-26	1
2011-01-27	1
2011-01-28	1
2011-01-31	0
2011-02-01	0
2011-02-02	0
2011-02-03	0
2011-02-04	0
2011-02-07	0
2011-02-08	0
2011-02-09	1
2011-02-10	0
2011-02-11	0
2011-02-14	0
2011-02-15	0
2011-02-16	1
2011-02-17	0
2011-02-18	0
2011-02-22	0
2011-02-23	0
2011-02-24	1
2011-02-25	1
2011-02-28	1
2011-03-01	1
2011-03-02	1
2011-03-03	0
2011-03-04	1
2011-03-07	1
2011-03-08	1
2011-03-09	0
2011-03-10	0
2011-03-11	0
2011-03-14	1
2011-03-15	1
2011-03-16	1
2011-03-17	1
2011-03-18	1
2011-03-21	0
2011-03-22	0
2011-03-23	1
2011-03-24	1
2011-03-25	1
2011-03-28	1
2011-03-29	1
2011-03-30	1
2011-03-31	0
2011-04-01	0
2011-04-04	0
2011-04-05	0
2011-04-06	0
2011-04-07	0
2011-04-08	0
2011-04-11	0
2011-04-12	0
2011-04-13	1
2011-04-14	1
2011-04-15	1
2011-04-18	1
2011-04-19	1
2011-04-20	1
2011-04-21	1
2011-04-25	0
2011-04-26	1
2011-04-27	1
2011-04-28	0
2011-04-29	0
2011-05-02	0
2011-05-03	0
2011-05-04	0
2011-05-05	0
2011-05-06	0
2011-05-09	0
2011-05-10	0
2011-05-11	0
2011-05-12	0
2011-05-13	1
2011-05-16	1
2011-05-17	1
2011-05-18	0
2011-05-19	0
2011-05-20	0
2011-05-23	1
2011-05-24	1
2011-05-25	1
2011-05-26	0
2011-05-27	0
2011-05-31	1
2011-06-01	1
2011-06-02	1
2011-06-03	1
2011-06-06	1
2011-06-07	1
2011-06-08	1
2011-06-09	1
2011-06-10	1
2011-06-13	1
2011-06-14	0
2011-06-15	1
2011-06-16	1
2011-06-17	1
2011-06-20	0
2011-06-21	1
2011-06-22	1
2011-06-23	1
2011-06-24	1
2011-06-27	1
2011-06-28	1
2011-06-29	1
2011-06-30	0
2011-07-01	1
2011-07-05	0
2011-07-06	0
2011-07-07	1
2011-07-08	1
2011-07-11	0
2011-07-12	0
2011-07-13	0
2011-07-14	0
2011-07-15	0
2011-07-18	1
2011-07-19	0
2011-07-20	0
2011-07-21	0
2011-07-22	0
2011-07-25	0
2011-07-26	1
2011-07-27	0
2011-07-28	0
2011-07-29	0
2011-08-01	0
2011-08-02	0
2011-08-03	0
2011-08-04	1
2011-08-05	1
2011-08-08	1
2011-08-09	1
2011-08-10	1
2011-08-11	1
2011-08-12	0
2011-08-15	0
2011-08-16	0
2011-08-17	1
2011-08-18	1
2011-08-19	1
2011-08-22	1
2011-08-23	1
2011-08-24	0
2011-08-25	1
2011-08-26	0
2011-08-29	0
2011-08-30	0
2011-08-31	0
2011-09-01	0
2011-09-02	0
2011-09-06	0
2011-09-07	0
2011-09-08	0
2011-09-09	0
2011-09-12	0
2011-09-13	0
2011-09-14	1
2011-09-15	0
2011-09-16	1
2011-09-19	1
2011-09-20	1
2011-09-21	0
2011-09-22	0
2011-09-23	1
2011-09-26	0
2011-09-27	0
2011-09-28	0
2011-09-29	0
2011-09-30	0
2011-10-03	1
2011-10-04	1
2011-10-05	1
2011-10-06	1
2011-10-07	1
2011-10-10	1
2011-10-11	1
2011-10-12	1
2011-10-13	1
2011-10-14	1
2011-10-17	1
2011-10-18	0
2011-10-19	1
2011-10-20	1
2011-10-21	1
2011-10-24	1
2011-10-25	1
2011-10-26	0
2011-10-27	0
2011-10-28	0
2011-10-31	0
2011-11-01	0
2011-11-02	1
2011-11-03	0
2011-11-04	1
2011-11-07	1
2011-11-08	0
2011-11-09	0
2011-11-10	1
2011-11-11	1
2011-11-14	1
2011-11-15	1
2011-11-16	0
2011-11-17	1
2011-11-18	1
2011-11-21	1
2011-11-22	1
2011-11-23	0
2011-11-25	0
2011-11-28	0
2011-11-29	0
2011-11-30	0
2011-12-01	1
2011-12-02	1
2011-12-05	1
2011-12-06	1
2011-12-07	1
2011-12-08	1
2011-12-09	0
2011-12-12	0
2011-12-13	0
2011-12-14	0
2011-12-15	0
2011-12-16	0
2011-12-19	0
2011-12-20	0
2011-12-21	0
2011-12-22	1
2011-12-23	0
2011-12-27	0
2011-12-28	0
2011-12-29	0
2011-12-30	0
2012-01-03	0
2012-01-04	0
2012-01-05	0
2012-01-06	0
2012-01-09	0
2012-01-10	0
2012-01-11	0
2012-01-12	0
2012-01-13	0
2012-01-17	1
2012-01-18	1
2012-01-19	1
2012-01-20	0
2012-01-23	0
2012-01-24	1
2012-01-25	1
2012-01-26	1
2012-01-27	1
2012-01-30	1
2012-01-31	1
2012-02-01	1
2012-02-02	1
2012-02-03	1
2012-02-06	1
2012-02-07	1
2012-02-08	1
2012-02-09	0
2012-02-10	0
2012-02-13	1
2012-02-14	1
2012-02-15	1
2012-02-16	0
2012-02-17	0
2012-02-21	0
2012-02-22	0
2012-02-23	0
2012-02-24	0
2012-02-27	0
2012-02-28	1
2012-02-29	0
2012-03-01	0
2012-03-02	0
2012-03-05	0
2012-03-06	0
2012-03-07	0
2012-03-08	1
2012-03-09	1
2012-03-12	1
2012-03-13	1
2012-03-14	1
2012-03-15	1
2012-03-16	0
2012-03-19	1
2012-03-20	1
2012-03-21	0
2012-03-22	1
2012-03-23	1
2012-03-26	1
2012-03-27	1
2012-03-28	1
2012-03-29	1
2012-03-30	1
2012-04-02	1
2012-04-03	1
2012-04-04	1
2012-04-05	1
2012-04-09	1
2012-04-10	0
2012-04-11	0
2012-04-12	0
2012-04-13	0
2012-04-16	0
2012-04-17	1
2012-04-18	1
2012-04-19	1
2012-04-20	1
2012-04-23	1
2012-04-24	1
2012-04-25	1
2012-04-26	0
2012-04-27	0
2012-04-30	0
2012-05-01	0
2012-05-02	0
2012-05-03	0
2012-05-04	0
2012-05-07	0
2012-05-08	0
2012-05-09	0
2012-05-10	1
2012-05-11	1
2012-05-14	1
2012-05-15	1
2012-05-16	0
2012-05-17	1
2012-05-18	0
2012-05-21	0
2012-05-22	0
2012-05-23	0
2012-05-24	1
2012-05-25	0
2012-05-29	0
2012-05-30	1
2012-05-31	0
2012-06-01	0
2012-06-04	0
2012-06-05	1
2012-06-06	1
2012-06-07	1
2012-06-08	1
2012-06-11	1
2012-06-12	0
2012-06-13	1
2012-06-14	1
2012-06-15	1
2012-06-18	1
2012-06-19	1
2012-06-20	0
2012-06-21	0
2012-06-22	1
2012-06-25	0
2012-06-26	0
2012-06-27	0
2012-06-28	0
2012-06-29	1
2012-07-02	1
2012-07-03	1
2012-07-05	1
2012-07-06	1
2012-07-09	1
2012-07-10	0
2012-07-11	0
2012-07-12	0
2012-07-13	0
2012-07-16	1
2012-07-17	0
2012-07-18	1
2012-07-19	1
2012-07-20	0
2012-07-23	1
2012-07-24	1
2012-07-25	0
2012-07-26	0
2012-07-27	0
2012-07-30	1
2012-07-31	0
2012-08-01	0
2012-08-02	0
2012-08-03	0
2012-08-06	0
2012-08-07	0
2012-08-08	0
2012-08-09	0
2012-08-10	0
2012-08-13	1
2012-08-14	0
2012-08-15	0
2012-08-16	0
2012-08-17	1
2012-08-20	1
2012-08-21	0
2012-08-22	1
2012-08-23	0
2012-08-24	0
2012-08-27	1
2012-08-28	1
2012-08-29	1
2012-08-30	1
2012-08-31	1
2012-09-04	0
2012-09-05	0
2012-09-06	0
2012-09-07	1
2012-09-10	1
2012-09-11	1
2012-09-12	1
2012-09-13	0
2012-09-14	0
2012-09-17	1
2012-09-18	1
2012-09-19	0
2012-09-20	0
2012-09-21	0
2012-09-24	1
2012-09-25	0
2012-09-26	0
2012-09-27	0
2012-09-28	0
2012-10-01	0
2012-10-02	0
2012-10-03	0
2012-10-04	0
2012-10-05	0
2012-10-08	0
2012-10-09	0
2012-10-10	0
2012-10-11	0
2012-10-12	0
2012-10-15	0
2012-10-16	1
2012-10-17	1
2012-10-18	1
2012-10-19	1
2012-10-22	1
2012-10-23	1
2012-10-24	0
2012-10-25	1
2012-10-26	1
2012-10-31	1
2012-11-01	1
2012-11-02	1
2012-11-05	1
2012-11-06	1
2012-11-07	1
2012-11-08	1
2012-11-09	1
2012-11-12	1
2012-11-13	0
2012-11-14	0
2012-11-15	1
2012-11-16	1
2012-11-19	0
2012-11-20	0
2012-11-21	0
2012-11-23	1
2012-11-26	0
2012-11-27	1
2012-11-28	1
2012-11-29	1
2012-11-30	0
2012-12-03	0
2012-12-04	0
2012-12-05	1
2012-12-06	1
2012-12-07	1
2012-12-10	1
2012-12-11	1
2012-12-12	1
2012-12-13	1
2012-12-14	1
2012-12-17	1
2012-12-18	0
2012-12-19	0
2012-12-20	0
2012-12-21	0
2012-12-24	0
2012-12-26	0
2012-12-27	0
2012-12-28	0
2012-12-31	1
2013-01-02	1
2013-01-03	1
2013-01-04	0
2013-01-07	0
2013-01-08	1
2013-01-09	1
2013-01-10	1
2013-01-11	1
2013-01-14	1
2013-01-15	0
2013-01-16	0
2013-01-17	0
2013-01-18	0
2013-01-22	1
2013-01-23	1
2013-01-24	0
2013-01-25	0
2013-01-28	0
2013-01-29	0
2013-01-30	1
2013-01-31	1
2013-02-01	1
2013-02-04	1
2013-02-05	1
2013-02-06	0
2013-02-07	0
2013-02-08	0
2013-02-11	0
2013-02-12	0
2013-02-13	1
2013-02-14	1
2013-02-15	0
2013-02-19	1
2013-02-20	0
2013-02-21	0
2013-02-22	0
2013-02-25	1
2013-02-26	0
2013-02-27	0
2013-02-28	0
2013-03-01	1
2013-03-04	1
2013-03-05	0
2013-03-06	0
2013-03-07	0
2013-03-08	0
2013-03-11	0
2013-03-12	0
2013-03-13	0
2013-03-14	1
2013-03-15	1
2013-03-18	1
2013-03-19	1
2013-03-20	1
2013-03-21	1
2013-03-22	0
2013-03-25	0
2013-03-26	0
2013-03-27	1
2013-03-28	0
2013-04-01	0
2013-04-02	0
2013-04-03	0
2013-04-04	0
2013-04-05	0
2013-04-08	0
2013-04-09	0
2013-04-10	0
2013-04-11	0
2013-04-12	0
2013-04-15	0
2013-04-16	1
2013-04-17	0
2013-04-18	0
2013-04-19	0
2013-04-22	0
2013-04-23	0
2013-04-24	0
2013-04-25	0
2013-04-26	1
2013-04-29	1
2013-04-30	0
2013-05-01	1
2013-05-02	0
2013-05-03	0
2013-05-06	0
2013-05-07	0
2013-05-08	0
2013-05-09	0
2013-05-10	0
2013-05-13	0
2013-05-14	1
2013-05-15	1
2013-05-16	1
2013-05-17	0
2013-05-20	0
2013-05-21	0
2013-05-22	0
2013-05-23	0
2013-05-24	1
2013-05-28	1
2013-05-29	0
2013-05-30	0
2013-05-31	1
2013-06-03	1
2013-06-04	1
2013-06-05	1
2013-06-06	1
2013-06-07	1
2013-06-10	0
2013-06-11	1
2013-06-12	1
2013-06-13	1
2013-06-14	1
2013-06-17	1
2013-06-18	1
2013-06-19	1
2013-06-20	1
2013-06-21	1
2013-06-24	1
2013-06-25	1
2013-06-26	1
2013-06-27	1
2013-06-28	1
2013-07-01	1
2013-07-02	1
2013-07-03	1
2013-07-05	1
2013-07-08	1
2013-07-09	1
2013-07-10	0
2013-07-11	1
2013-07-12	1
2013-07-15	1
2013-07-16	1
2013-07-17	1
2013-07-18	1
2013-07-19	1
2013-07-22	1
2013-07-23	1
2013-07-24	0
2013-07-25	1
2013-07-26	1
2013-07-29	1
2013-07-30	1
2013-07-31	0
2013-08-01	0
2013-08-02	1
2013-08-05	1
2013-08-06	1
2013-08-07	1
2013-08-08	1
2013-08-09	1
2013-08-12	1
2013-08-13	1
2013-08-14	1
2013-08-15	1
2013-08-16	1
2013-08-19	1
2013-08-20	1
2013-08-21	1
2013-08-22	1
2013-08-23	1
2013-08-26	1
2013-08-27	1
2013-08-28	1
2013-08-29	1
2013-08-30	0
2013-09-03	0
2013-09-04	1
2013-09-05	1
2013-09-06	0
2013-09-09	0
2013-09-10	0
2013-09-11	1
2013-09-12	1
2013-09-13	1
2013-09-16	1
2013-09-17	1
2013-09-18	0
2013-09-19	0
2013-09-20	0
2013-09-23	0
2013-09-24	0
2013-09-25	0
2013-09-26	0
2013-09-27	0
2013-09-30	0
2013-10-01	0
2013-10-02	0
2013-10-03	0
2013-10-04	0
2013-10-07	0
2013-10-08	0
2013-10-09	0
2013-10-10	0
2013-10-11	0
2013-10-14	0
2013-10-15	0
2013-10-16	1
2013-10-17	1
2013-10-18	1
2013-10-21	1
2013-10-22	1
2013-10-23	0
2013-10-24	0
2013-10-25	0
2013-10-28	0
2013-10-29	1
2013-10-30	1
2013-10-31	1
2013-11-01	1
2013-11-04	1
2013-11-05	1
2013-11-06	0
2013-11-07	0
2013-11-08	0
2013-11-11	1
2013-11-12	1
2013-11-13	1
2013-11-14	0
2013-11-15	1
2013-11-18	1
2013-11-19	1
2013-11-20	1
2013-11-21	1
2013-11-22	0
2013-11-25	0
2013-11-26	0
2013-11-27	0
2013-11-29	0
2013-12-02	1
2013-12-03	0
2013-12-04	1
2013-12-05	1
2013-12-06	1
2013-12-09	1
2013-12-10	1
2013-12-11	1
2013-12-12	0
2013-12-13	1
2013-12-16	1
2013-12-17	1
2013-12-18	1
2013-12-19	1
2013-12-20	1
2013-12-23	0
2013-12-24	1
2013-12-26	1
2013-12-27	0
2013-12-30	1
2013-12-31	0
2014-01-02	1
2014-01-03	1
2014-01-06	1
2014-01-07	1
2014-01-08	1
2014-01-09	1
2014-01-10	1
2014-01-13	1
2014-01-14	0
2014-01-15	0
2014-01-16	0
2014-01-17	1
2014-01-21	0
2014-01-22	0
2014-01-23	0
2014-01-24	0
2014-01-27	0
2014-01-28	1
2014-01-29	1
2014-01-30	1
2014-01-31	1
2014-02-03	1
2014-02-04	1
2014-02-05	1
2014-02-06	1
2014-02-07	1
2014-02-10	1
2014-02-11	1
2014-02-12	1
2014-02-13	1
2014-02-14	1
2014-02-18	0
2014-02-19	0
2014-02-20	0
2014-02-21	1
2014-02-24	1
2014-02-25	1
2014-02-26	1
2014-02-27	1
2014-02-28	1
2014-03-03	1
2014-03-04	1
2014-03-05	0
2014-03-06	1
2014-03-07	1
2014-03-10	1
2014-03-11	1
2014-03-12	1
2014-03-13	1
2014-03-14	1
2014-03-17	1
2014-03-18	1
2014-03-19	1
2014-03-20	1
2014-03-21	1
2014-03-24	1
2014-03-25	1
2014-03-26	1
2014-03-27	1
2014-03-28	1
2014-03-31	1
2014-04-01	1
2014-04-02	1
2014-04-03	1
2014-04-04	1
2014-04-07	1
2014-04-08	1
2014-04-09	1
2014-04-10	1
2014-04-11	1
2014-04-14	1
2014-04-15	1
2014-04-16	1
2014-04-17	1
2014-04-21	1
2014-04-22	1
2014-04-23	1
2014-04-24	0
2014-04-25	0
2014-04-28	0
2014-04-29	0
2014-04-30	0
2014-05-01	0
2014-05-02	0
2014-05-05	0
2014-05-06	0
2014-05-07	0
2014-05-08	0
2014-05-09	0
2014-05-12	0
2014-05-13	0
2014-05-14	0
2014-05-15	0
2014-05-16	0
2014-05-19	0
2014-05-20	1
2014-05-21	1
2014-05-22	1
2014-05-23	0
2014-05-27	0
2014-05-28	1
2014-05-29	0
2014-05-30	1
2014-06-02	0
2014-06-03	0
2014-06-04	1
2014-06-05	1
2014-06-06	0
2014-06-09	0
2014-06-10	0
2014-06-11	0
2014-06-12	1
2014-06-13	1
2014-06-16	1
2014-06-17	1
2014-06-18	0
2014-06-19	0
2014-06-20	1
2014-06-23	1
2014-06-24	1
2014-06-25	1
2014-06-26	1
2014-06-27	0
2014-06-30	0
2014-07-01	1
2014-07-02	1
2014-07-03	1
2014-07-07	0
2014-07-08	1
2014-07-09	1
2014-07-10	1
2014-07-11	1
2014-07-14	0
2014-07-15	1
2014-07-16	1
2014-07-17	1
2014-07-18	0
2014-07-21	0
2014-07-22	0
2014-07-23	0
2014-07-24	1
2014-07-25	1
2014-07-28	0
2014-07-29	1
2014-07-30	1
2014-07-31	1
2014-08-01	1
2014-08-04	1
2014-08-05	1
2014-08-06	1
2014-08-07	1
2014-08-08	1
2014-08-11	0
2014-08-12	1
2014-08-13	1
2014-08-14	0
2014-08-15	0
2014-08-18	0
2014-08-19	0
2014-08-20	1
2014-08-21	1
2014-08-22	1
2014-08-25	1
2014-08-26	1
2014-08-27	1
2014-08-28	1
2014-08-29	1
2014-09-02	1
2014-09-03	1
2014-09-04	1
2014-09-05	1
2014-09-08	1
2014-09-09	1
2014-09-10	0
2014-09-11	0
2014-09-12	0
2014-09-15	0
2014-09-16	1
2014-09-17	0
2014-09-18	0
2014-09-19	1
2014-09-22	0
2014-09-23	1
2014-09-24	1
2014-09-25	1
2014-09-26	1
2014-09-29	1
2014-09-30	1
2014-10-01	1
2014-10-02	1
2014-10-03	1
2014-10-06	1
2014-10-07	1
2014-10-08	1
2014-10-09	1
2014-10-10	1
2014-10-13	1
2014-10-14	1
2014-10-15	0
2014-10-16	1
2014-10-17	1
2014-10-20	0
2014-10-21	1
2014-10-22	1
2014-10-23	1
2014-10-24	0
2014-10-27	0
2014-10-28	0
2014-10-29	0
2014-10-30	0
2014-10-31	0
2014-11-03	0
2014-11-04	0
2014-11-05	0
2014-11-06	0
2014-11-07	0
2014-11-10	0
2014-11-11	1
2014-11-12	1
2014-11-13	1
2014-11-14	0
2014-11-17	0
2014-11-18	0
2014-11-19	0
2014-11-20	0
2014-11-21	0
2014-11-24	0
2014-11-25	1
2014-11-26	0
2014-11-28	1
2014-12-01	1
2014-12-02	1
2014-12-03	0
2014-12-04	0
2014-12-05	0
2014-12-08	0
2014-12-09	0
2014-12-10	1
2014-12-11	1
2014-12-12	1
2014-12-15	1
2014-12-16	1
2014-12-17	1
2014-12-18	1
2014-12-19	1
2014-12-22	0
2014-12-23	0
2014-12-24	0
2014-12-26	0
2014-12-29	0
2014-12-30	0
2014-12-31	0
2015-01-02	0
2015-01-05	0
2015-01-06	0
2015-01-07	0
2015-01-08	0
2015-01-09	1
2015-01-12	1
2015-01-13	0
2015-01-14	1
2015-01-15	1
2015-01-16	1
2015-01-20	1
2015-01-21	1
2015-01-22	1
2015-01-23	0
2015-01-26	0
2015-01-27	1
2015-01-28	1
2015-01-29	1
2015-01-30	0
2015-02-02	0
2015-02-03	0
2015-02-04	0
2015-02-05	0
2015-02-06	0
2015-02-09	1
2015-02-10	1
2015-02-11	1
2015-02-12	1
2015-02-13	1
2015-02-17	1
2015-02-18	1
2015-02-19	1
2015-02-20	1
2015-02-23	0
2015-02-24	0
2015-02-25	0
2015-02-26	0
2015-02-27	0
2015-03-02	0
2015-03-03	1
2015-03-04	0
2015-03-05	0
2015-03-06	0
2015-03-09	0
2015-03-10	1
2015-03-11	1
2015-03-12	0
2015-03-13	1
2015-03-16	0
2015-03-17	0
2015-03-18	0
2015-03-19	1
2015-03-20	1
2015-03-23	0
2015-03-24	1
2015-03-25	1
2015-03-26	1
2015-03-27	1
2015-03-30	0
2015-03-31	1
2015-04-01	1
2015-04-02	0
2015-04-06	1
2015-04-07	0
2015-04-08	1
2015-04-09	1
2015-04-10	0
2015-04-13	1
2015-04-14	1
2015-04-15	1
2015-04-16	1
2015-04-17	1
2015-04-20	1
2015-04-21	1
2015-04-22	1
2015-04-23	0
2015-04-24	0
2015-04-27	0
2015-04-28	0
2015-04-29	0
2015-04-30	0
2015-05-01	0
2015-05-04	0
2015-05-05	0
2015-05-06	0
2015-05-07	0
2015-05-08	0
2015-05-11	0
2015-05-12	1
2015-05-13	1
2015-05-14	0
2015-05-15	0
2015-05-18	0
2015-05-19	0
2015-05-20	0
2015-05-21	1
2015-05-22	1
2015-05-26	0
2015-05-27	1
2015-05-28	0
2015-05-29	0
2015-06-01	0
2015-06-02	0
2015-06-03	0
2015-06-04	1
2015-06-05	1
2015-06-08	1
2015-06-09	1
2015-06-10	1
2015-06-11	0
2015-06-12	1
2015-06-15	1
2015-06-16	1
2015-06-17	1
2015-06-18	0
2015-06-19	1
2015-06-22	0
2015-06-23	1
2015-06-24	0
2015-06-25	0
2015-06-26	1
2015-06-29	1
2015-06-30	1
2015-07-01	0
2015-07-02	0
2015-07-06	1
2015-07-07	0
2015-07-08	1
2015-07-09	1
2015-07-10	1
2015-07-13	0
2015-07-14	0
2015-07-15	0
2015-07-16	0
2015-07-17	0
2015-07-20	0
2015-07-21	0
2015-07-22	1
2015-07-23	1
2015-07-24	1
2015-07-27	1
2015-07-28	1
2015-07-29	1
2015-07-30	1
2015-07-31	1
2015-08-03	1
2015-08-04	1
2015-08-05	1
2015-08-06	1
2015-08-07	1
2015-08-10	1
2015-08-11	1
2015-08-12	1
2015-08-13	0
2015-08-14	0
2015-08-17	0
2015-08-18	1
2015-08-19	1
2015-08-20	1
2015-08-21	1
2015-08-24	1
2015-08-25	1
2015-08-26	1
2015-08-27	1
2015-08-28	1
2015-08-31	1
2015-09-01	1
2015-09-02	1
2015-09-03	1
2015-09-04	0
2015-09-08	0
2015-09-09	0
2015-09-10	0
2015-09-11	0
2015-09-14	0
2015-09-15	0
2015-09-16	0
2015-09-17	0
2015-09-18	0
2015-09-21	0
2015-09-22	0
2015-09-23	1
2015-09-24	0
2015-09-25	1
2015-09-28	1
2015-09-29	1
2015-09-30	0
2015-10-01	1
2015-10-02	0
2015-10-05	0
2015-10-06	0
2015-10-07	0
2015-10-08	0
2015-10-09	0
2015-10-12	0
2015-10-13	0
2015-10-14	0
2015-10-15	0
2015-10-16	0
2015-10-19	1
2015-10-20	1
2015-10-21	1
2015-10-22	1
2015-10-23	1
2015-10-26	0
2015-10-27	1
2015-10-28	1
2015-10-29	1
2015-10-30	1
2015-11-02	1
2015-11-03	1
2015-11-04	1
2015-11-05	1
2015-11-06	1
2015-11-09	0
2015-11-10	1
2015-11-11	1
2015-11-12	1
2015-11-13	1
2015-11-16	1
2015-11-17	0
2015-11-18	1
2015-11-19	1
2015-11-20	1
2015-11-23	1
2015-11-24	1
2015-11-25	1
2015-11-27	1
2015-11-30	0
2015-12-01	0
2015-12-02	1
2015-12-03	1
2015-12-04	1
2015-12-07	1
2015-12-08	0
2015-12-09	1
2015-12-10	1
2015-12-11	1
2015-12-14	1
2015-12-15	1
2015-12-16	1
2015-12-17	1
2015-12-18	1
2015-12-21	1
2015-12-22	0
2015-12-23	0
2015-12-24	0
2015-12-28	0
2015-12-29	0
2015-12-30	0
2015-12-31	0
2016-01-04	1
2016-01-05	1
2016-01-06	1
2016-01-07	1
2016-01-08	1
2016-01-11	1
2016-01-12	1
2016-01-13	1
2016-01-14	0
2016-01-15	1
2016-01-19	1
2016-01-20	1
2016-01-21	0
2016-01-22	1
2016-01-25	0
2016-01-26	0
2016-01-27	1
2016-01-28	1
2016-01-29	1
2016-02-01	1
2016-02-02	1
2016-02-03	1
2016-02-04	1
2016-02-05	1
2016-02-08	0
2016-02-09	0
2016-02-10	0
2016-02-11	0
2016-02-12	0
2016-02-16	1
2016-02-17	1
2016-02-18	1
2016-02-19	1
2016-02-22	1
2016-02-23	0
2016-02-24	1
2016-02-25	1
2016-02-26	1
2016-02-29	0
2016-03-01	1
2016-03-02	1
2016-03-03	1
2016-03-04	1
2016-03-07	1
2016-03-08	1
2016-03-09	1
2016-03-10	1
2016-03-11	1
2016-03-14	1
2016-03-15	1
2016-03-16	1
2016-03-17	0
2016-03-18	0
2016-03-21	0
2016-03-22	0
2016-03-23	0
2016-03-24	1
2016-03-28	1
2016-03-29	1
2016-03-30	0
2016-03-31	0
2016-04-01	0
2016-04-04	0
2016-04-05	1
2016-04-06	0
2016-04-07	1
2016-04-08	1
2016-04-11	0
2016-04-12	1
2016-04-13	1
2016-04-14	1
2016-04-15	1
2016-04-18	0
2016-04-19	0
2016-04-20	0
2016-04-21	1
2016-04-22	1
2016-04-25	1
2016-04-26	0
2016-04-27	0
2016-04-28	0
2016-04-29	0
2016-05-02	0
2016-05-03	0
2016-05-04	0
2016-05-05	1
2016-05-06	1
2016-05-09	0
2016-05-10	1
2016-05-11	1
2016-05-12	1
2016-05-13	1
2016-05-16	1
2016-05-17	1
2016-05-18	1
2016-05-19	1
2016-05-20	1
2016-05-23	1
2016-05-24	0
2016-05-25	0
2016-05-26	0
2016-05-27	0
2016-05-31	0
2016-06-01	0
2016-06-02	1
2016-06-03	1
2016-06-06	1
2016-06-07	1
2016-06-08	1
2016-06-09	1
2016-06-10	1
2016-06-13	1
2016-06-14	1
2016-06-15	1
2016-06-16	1
2016-06-17	0
2016-06-20	1
2016-06-21	0
2016-06-22	1
2016-06-23	0
2016-06-24	0
2016-06-27	0
2016-06-28	0
2016-06-29	0
2016-06-30	0
2016-07-01	0
2016-07-05	0
2016-07-06	0
2016-07-07	1
2016-07-08	1
2016-07-11	1
2016-07-12	1
2016-07-13	1
2016-07-14	0
2016-07-15	1
2016-07-18	1
2016-07-19	1
2016-07-20	1
2016-07-21	0
2016-07-22	0
2016-07-25	0
2016-07-26	1
2016-07-27	0
2016-07-28	1
2016-07-29	1
2016-08-01	1
2016-08-02	1
2016-08-03	0
2016-08-04	0
2016-08-05	0
2016-08-08	0
2016-08-09	0
2016-08-10	1
2016-08-11	1
2016-08-12	0
2016-08-15	0
2016-08-16	1
2016-08-17	1
2016-08-18	0
2016-08-19	0
2016-08-22	0
2016-08-23	1
2016-08-24	1
2016-08-25	0
2016-08-26	0
2016-08-29	0
2016-08-30	0
2016-08-31	0
2016-09-01	0
2016-09-02	0
2016-09-06	1
2016-09-07	0
2016-09-08	0
2016-09-09	0
2016-09-12	0
2016-09-13	0
2016-09-14	0
2016-09-15	1
2016-09-16	0
2016-09-19	1
2016-09-20	1
2016-09-21	1
2016-09-22	1
2016-09-23	0
2016-09-26	0
2016-09-27	0
2016-09-28	0
2016-09-29	0
2016-09-30	0
2016-10-03	0
2016-10-04	1
2016-10-05	1
2016-10-06	1
2016-10-07	1
2016-10-10	0
2016-10-11	0
2016-10-12	0
2016-10-13	0
2016-10-14	0
2016-10-17	0
2016-10-18	1
2016-10-19	1
2016-10-20	1
2016-10-21	0
2016-10-24	0
2016-10-25	0
2016-10-26	0
2016-10-27	0
2016-10-28	0
2016-10-31	0
2016-11-01	0
2016-11-02	1
2016-11-03	1
2016-11-04	0
2016-11-07	0
2016-11-08	0
2016-11-09	0
2016-11-10	0
2016-11-11	0
2016-11-14	0
2016-11-15	0
2016-11-16	0
2016-11-17	1
2016-11-18	0
2016-11-21	1
2016-11-22	0
2016-11-23	0
2016-11-25	1
2016-11-28	0
2016-11-29	1
2016-11-30	1
2016-12-01	1
2016-12-02	1
2016-12-05	0
2016-12-06	1
2016-12-07	0
2016-12-08	1
2016-12-09	0
2016-12-12	0
2016-12-13	0
2016-12-14	0
2016-12-15	0
2016-12-16	0
2016-12-19	1
2016-12-20	1
2016-12-21	1
2016-12-22	1
2016-12-23	1
2016-12-27	1
2016-12-28	1
2016-12-29	1
2016-12-30	0
2017-01-03	1
2017-01-04	1
2017-01-05	0
2017-01-06	1
2017-01-09	1
2017-01-10	0
2017-01-11	0
2017-01-12	0
2017-01-13	1
2017-01-17	1
2017-01-18	0
2017-01-19	0
2017-01-20	0
2017-01-23	0
2017-01-24	0
2017-01-25	0
2017-01-26	1
2017-01-27	0
2017-01-30	0
2017-01-31	1
2017-02-01	1
2017-02-02	0
2017-02-03	0
2017-02-06	0
2017-02-07	0
2017-02-08	0
2017-02-09	1
2017-02-10	1
2017-02-13	1
2017-02-14	1
2017-02-15	1
2017-02-16	0
2017-02-17	0
2017-02-21	0
2017-02-22	0
2017-02-23	0
2017-02-24	0
2017-02-27	1
2017-02-28	1
2017-03-01	0
2017-03-02	1
2017-03-03	0
2017-03-06	0
2017-03-07	1
2017-03-08	0
2017-03-09	0
2017-03-10	0
2017-03-13	1
2017-03-14	0
2017-03-15	0
2017-03-16	1
2017-03-17	0
2017-03-20	0
2017-03-21	1
2017-03-22	0
2017-03-23	1
2017-03-24	1
2017-03-27	1
2017-03-28	1
2017-03-29	1
2017-03-30	0
2017-03-31	0
2017-04-03	1
2017-04-04	1
2017-04-05	1
2017-04-06	0
2017-04-07	0
2017-04-10	0
2017-04-11	0
2017-04-12	1
2017-04-13	1
2017-04-17	0
2017-04-18	1
2017-04-19	0
2017-04-20	1
2017-04-21	1
2017-04-24	1
2017-04-25	0
2017-04-26	0
2017-04-27	0
2017-04-28	0
2017-05-01	1
2017-05-02	1
2017-05-03	1
2017-05-04	1
2017-05-05	1
2017-05-08	1
2017-05-09	1
2017-05-10	0
2017-05-11	1
2017-05-12	1
2017-05-15	1
2017-05-16	0
2017-05-17	0
2017-05-18	1
2017-05-19	1
2017-05-22	1
2017-05-23	1
2017-05-24	0
2017-05-25	1
2017-05-26	1
2017-05-30	0
2017-05-31	0
2017-06-01	0
2017-06-02	0
2017-06-05	0
2017-06-06	1
2017-06-07	0
2017-06-08	0
2017-06-09	1
2017-06-12	1
2017-06-13	1
2017-06-14	1
2017-06-15	1
2017-06-16	1
2017-06-19	1
2017-06-20	0
2017-06-21	0
2017-06-22	0
2017-06-23	0
2017-06-26	0
2017-06-27	0
2017-06-28	0
2017-06-29	0
2017-06-30	0
2017-07-03	0
2017-07-05	0
2017-07-06	0
2017-07-07	0
2017-07-10	0
2017-07-11	0
2017-07-12	0
2017-07-13	0
2017-07-14	0
2017-07-17	0
2017-07-18	0
2017-07-19	1
2017-07-20	1
2017-07-21	1
2017-07-24	1
2017-07-25	1
2017-07-26	1
2017-07-27	1
2017-07-28	0
2017-07-31	0
2017-08-01	0
2017-08-02	0
2017-08-03	0
2017-08-04	0
2017-08-07	0
2017-08-08	0
2017-08-09	1
2017-08-10	1
2017-08-11	1
2017-08-14	1
2017-08-15	1
2017-08-16	0
2017-08-17	0
2017-08-18	0
2017-08-21	0
2017-08-22	0
2017-08-23	0
2017-08-24	1
2017-08-25	1
2017-08-28	0
2017-08-29	0
2017-08-30	0
2017-08-31	0
2017-09-01	0
2017-09-05	1
2017-09-06	1
2017-09-07	0
2017-09-08	0
2017-09-11	1
2017-09-12	0
2017-09-13	1
2017-09-14	0
2017-09-15	0
2017-09-18	0
2017-09-19	0
2017-09-20	0
2017-09-21	0
2017-09-22	0
2017-09-25	0
2017-09-26	0
2017-09-27	0
2017-09-28	1
2017-09-29	0
2017-10-02	0
2017-10-03	0
2017-10-04	0
2017-10-05	0
2017-10-06	0
2017-10-09	0
2017-10-10	0
2017-10-11	1
2017-10-12	1
2017-10-13	0
2017-10-16	0
2017-10-17	0
2017-10-18	0
2017-10-19	1
2017-10-20	0
2017-10-23	1
2017-10-24	1
2017-10-25	1
2017-10-26	0
2017-10-27	1
2017-10-30	1
2017-10-31	1
2017-11-01	1
2017-11-02	1
2017-11-03	1
2017-11-06	1
2017-11-07	1
2017-11-08	1
2017-11-09	1
2017-11-10	1
2017-11-13	1
2017-11-14	1
2017-11-15	1
2017-11-16	1
2017-11-17	1
2017-11-20	0
2017-11-21	1
2017-11-22	1
2017-11-24	1
2017-11-27	1
2017-11-28	1
2017-11-29	1
2017-11-30	1
2017-12-01	1
2017-12-04	1
2017-12-05	1
2017-12-06	1
2017-12-07	0
2017-12-08	1
2017-12-11	1
2017-12-12	1
2017-12-13	0
2017-12-14	0
2017-12-15	1
2017-12-18	1
2017-12-19	0
2017-12-20	0
2017-12-21	0
2017-12-22	1
2017-12-26	0
2017-12-27	1
2017-12-28	1
[truncated: 1 more rows]
